# Supplementary material
Source: ML conference proceedings conference paper supplement (https://proceedings.neurips.cc/paper_files/paper/2020/hash/aab085461de182608ee9f607f3f7d18f-Abstract.html)
Supplement: Supplementary file 16 [file aab085461de182608ee9f607f3f7d18f-Supplemental.zip]

Archive with 245 entries (196 files):
- supplemental/
- supplemental/Supplemental_Materials.pdf
- __MACOSX/
- __MACOSX/supplemental/
- __MACOSX/supplemental/._Supplemental_Materials.pdf
- supplemental/evidential_regression/
- supplemental/evidential_regression/train_depth.py
- __MACOSX/supplemental/evidential_regression/
- __MACOSX/supplemental/evidential_regression/._train_depth.py
- supplemental/evidential_regression/download_data.sh
- __MACOSX/supplemental/evidential_regression/._download_data.sh
- supplemental/evidential_regression/environment.yml
- __MACOSX/supplemental/evidential_regression/._environment.yml
- supplemental/evidential_regression/run_uci_dataset_tests.py
- __MACOSX/supplemental/evidential_regression/._run_uci_dataset_tests.py
- supplemental/evidential_regression/figs/
- supplemental/evidential_regression/figs/toy/
- supplemental/evidential_regression/figs/toy/evidence_noreg_4_layers_100_neurons.pdf
- __MACOSX/supplemental/evidential_regression/figs/
- __MACOSX/supplemental/evidential_regression/figs/toy/
- __MACOSX/supplemental/evidential_regression/figs/toy/._evidence_noreg_4_layers_100_neurons.pdf
- supplemental/evidential_regression/figs/toy/ensemble_4_layers_100_neurons.pdf
- __MACOSX/supplemental/evidential_regression/figs/toy/._ensemble_4_layers_100_neurons.pdf
- supplemental/evidential_regression/figs/toy/evidence_reg_4_layers_100_neurons.pdf
- __MACOSX/supplemental/evidential_regression/figs/toy/._evidence_reg_4_layers_100_neurons.pdf
- supplemental/evidential_regression/figs/toy/gaussian_4_layers_100_neurons.pdf
- __MACOSX/supplemental/evidential_regression/figs/toy/._gaussian_4_layers_100_neurons.pdf
- supplemental/evidential_regression/figs/toy/bbbp_4_layers_100_neurons.pdf
- __MACOSX/supplemental/evidential_regression/figs/toy/._bbbp_4_layers_100_neurons.pdf
- supplemental/evidential_regression/figs/toy/dropout_4_layers_100_neurons.pdf
- __MACOSX/supplemental/evidential_regression/figs/toy/._dropout_4_layers_100_neurons.pdf
- __MACOSX/supplemental/evidential_regression/figs/._toy
- supplemental/evidential_regression/figs/depth/
- supplemental/evidential_regression/figs/depth/ood_Entropy_pdf_per_method.pdf
- __MACOSX/supplemental/evidential_regression/figs/depth/
- __MACOSX/supplemental/evidential_regression/figs/depth/._ood_Entropy_pdf_per_method.pdf
- supplemental/evidential_regression/figs/depth/ood_Entropy_cdfs.pdf
- __MACOSX/supplemental/evidential_regression/figs/depth/._ood_Entropy_cdfs.pdf
- supplemental/evidential_regression/figs/depth/adv_ood-False_method_sigma.pdf
- __MACOSX/supplemental/evidential_regression/figs/depth/._adv_ood-False_method_sigma.pdf
- supplemental/evidential_regression/figs/depth/calib_errors.csv
- __MACOSX/supplemental/evidential_regression/figs/depth/._calib_errors.csv
- supplemental/evidential_regression/figs/depth/calib_eps-0.0_ood-False_panel.pdf
- __MACOSX/supplemental/evidential_regression/figs/depth/._calib_eps-0.0_ood-False_panel.pdf
- supplemental/evidential_regression/figs/depth/adv_ood-False_cdf_method.pdf
- __MACOSX/supplemental/evidential_regression/figs/depth/._adv_ood-False_cdf_method.pdf
- supplemental/evidential_regression/figs/depth/ood_Entropy_violin.pdf
- __MACOSX/supplemental/evidential_regression/figs/depth/._ood_Entropy_violin.pdf
- supplemental/evidential_regression/figs/depth/adv_ood-False_method_error.pdf
- __MACOSX/supplemental/evidential_regression/figs/depth/._adv_ood-False_method_error.pdf
- supplemental/evidential_regression/figs/depth/calib_eps-0.0_ood-False.pdf
- __MACOSX/supplemental/evidential_regression/figs/depth/._calib_eps-0.0_ood-False.pdf
- supplemental/evidential_regression/figs/depth/cutoff_eps-0.0_ood-False.pdf
- __MACOSX/supplemental/evidential_regression/figs/depth/._cutoff_eps-0.0_ood-False.pdf
- supplemental/evidential_regression/figs/depth/cutoff_eps-0.0_ood-False_trial.pdf
- __MACOSX/supplemental/evidential_regression/figs/depth/._cutoff_eps-0.0_ood-False_trial.pdf
- supplemental/evidential_regression/figs/depth/cutoff_eps-0.0_ood-False_trial_panel.pdf
- __MACOSX/supplemental/evidential_regression/figs/depth/._cutoff_eps-0.0_ood-False_trial_panel.pdf
- supplemental/evidential_regression/figs/depth/ood_Entropy_box.pdf
- __MACOSX/supplemental/evidential_regression/figs/depth/._ood_Entropy_box.pdf
- __MACOSX/supplemental/evidential_regression/figs/._depth
- __MACOSX/supplemental/evidential_regression/._figs
- supplemental/evidential_regression/data_loader.py
- __MACOSX/supplemental/evidential_regression/._data_loader.py
- supplemental/evidential_regression/gen_depth_results.py
- __MACOSX/supplemental/evidential_regression/._gen_depth_results.py
- supplemental/evidential_regression/preprocess/
- supplemental/evidential_regression/preprocess/cache_apolloscape.py
- __MACOSX/supplemental/evidential_regression/preprocess/
- __MACOSX/supplemental/evidential_regression/preprocess/._cache_apolloscape.py
- supplemental/evidential_regression/preprocess/preprocess_nyu_depth.m
- __MACOSX/supplemental/evidential_regression/preprocess/._preprocess_nyu_depth.m
- supplemental/evidential_regression/preprocess/cache_nyu_depth.py
- __MACOSX/supplemental/evidential_regression/preprocess/._cache_nyu_depth.py
- __MACOSX/supplemental/evidential_regression/._preprocess
- supplemental/evidential_regression/models/
- supplemental/evidential_regression/models/toy/
- supplemental/evidential_regression/models/toy/deterministic.py
- __MACOSX/supplemental/evidential_regression/models/
- __MACOSX/supplemental/evidential_regression/models/toy/
- __MACOSX/supplemental/evidential_regression/models/toy/._deterministic.py
- supplemental/evidential_regression/models/toy/evidential.py
- __MACOSX/supplemental/evidential_regression/models/toy/._evidential.py
- supplemental/evidential_regression/models/toy/__pycache__/
- supplemental/evidential_regression/models/toy/__pycache__/h_params.cpython-37.pyc
- __MACOSX/supplemental/evidential_regression/models/toy/__pycache__/
- __MACOSX/supplemental/evidential_regression/models/toy/__pycache__/._h_params.cpython-37.pyc
- supplemental/evidential_regression/models/toy/__pycache__/bbbp.cpython-37.pyc
- __MACOSX/supplemental/evidential_regression/models/toy/__pycache__/._bbbp.cpython-37.pyc
- supplemental/evidential_regression/models/toy/__pycache__/evidential.cpython-37.pyc
- __MACOSX/supplemental/evidential_regression/models/toy/__pycache__/._evidential.cpython-37.pyc
- supplemental/evidential_regression/models/toy/__pycache__/dropout.cpython-37.pyc
- __MACOSX/supplemental/evidential_regression/models/toy/__pycache__/._dropout.cpython-37.pyc
- supplemental/evidential_regression/models/toy/__pycache__/ensemble.cpython-37.pyc
- __MACOSX/supplemental/evidential_regression/models/toy/__pycache__/._ensemble.cpython-37.pyc
- supplemental/evidential_regression/models/toy/__pycache__/gaussian.cpython-37.pyc
- __MACOSX/supplemental/evidential_regression/models/toy/__pycache__/._gaussian.cpython-37.pyc
- supplemental/evidential_regression/models/toy/__pycache__/deterministic.cpython-37.pyc
- __MACOSX/supplemental/evidential_regression/models/toy/__pycache__/._deterministic.cpython-37.pyc
- __MACOSX/supplemental/evidential_regression/models/toy/.___pycache__
- supplemental/evidential_regression/models/toy/bbbp.py
- __MACOSX/supplemental/evidential_regression/models/toy/._bbbp.py
- supplemental/evidential_regression/models/toy/ensemble.py
- __MACOSX/supplemental/evidential_regression/models/toy/._ensemble.py
- supplemental/evidential_regression/models/toy/h_params.py
- __MACOSX/supplemental/evidential_regression/models/toy/._h_params.py
- supplemental/evidential_regression/models/toy/dropout.py
- __MACOSX/supplemental/evidential_regression/models/toy/._dropout.py
- supplemental/evidential_regression/models/toy/gaussian.py
- __MACOSX/supplemental/evidential_regression/models/toy/._gaussian.py
- __MACOSX/supplemental/evidential_regression/models/._toy
- supplemental/evidential_regression/models/depth/
- supplemental/evidential_regression/models/depth/deterministic.py
- __MACOSX/supplemental/evidential_regression/models/depth/
- __MACOSX/supplemental/evidential_regression/models/depth/._deterministic.py
- supplemental/evidential_regression/models/depth/evidential.py
- __MACOSX/supplemental/evidential_regression/models/depth/._evidential.py
- supplemental/evidential_regression/models/depth/__pycache__/
- supplemental/evidential_regression/models/depth/__pycache__/bbbp.cpython-37.pyc
- __MACOSX/supplemental/evidential_regression/models/depth/__pycache__/
- __MACOSX/supplemental/evidential_regression/models/depth/__pycache__/._bbbp.cpython-37.pyc
- supplemental/evidential_regression/models/depth/__pycache__/evidential.cpython-37.pyc
- __MACOSX/supplemental/evidential_regression/models/depth/__pycache__/._evidential.cpython-37.pyc
- supplemental/evidential_regression/models/depth/__pycache__/dropout.cpython-37.pyc
- __MACOSX/supplemental/evidential_regression/models/depth/__pycache__/._dropout.cpython-37.pyc
- supplemental/evidential_regression/models/depth/__pycache__/ensemble.cpython-37.pyc
- __MACOSX/supplemental/evidential_regression/models/depth/__pycache__/._ensemble.cpython-37.pyc
- supplemental/evidential_regression/models/depth/__pycache__/gaussian.cpython-37.pyc
- __MACOSX/supplemental/evidential_regression/models/depth/__pycache__/._gaussian.cpython-37.pyc
- supplemental/evidential_regression/models/depth/__pycache__/deterministic.cpython-37.pyc
- __MACOSX/supplemental/evidential_regression/models/depth/__pycache__/._deterministic.cpython-37.pyc
- __MACOSX/supplemental/evidential_regression/models/depth/.___pycache__
- supplemental/evidential_regression/models/depth/bbbp.py
- __MACOSX/supplemental/evidential_regression/models/depth/._bbbp.py
- supplemental/evidential_regression/models/depth/ensemble.py
- __MACOSX/supplemental/evidential_regression/models/depth/._ensemble.py
- supplemental/evidential_regression/models/depth/dropout.py
- __MACOSX/supplemental/evidential_regression/models/depth/._dropout.py
- supplemental/evidential_regression/models/depth/gaussian.py
- __MACOSX/supplemental/evidential_regression/models/depth/._gaussian.py
- __MACOSX/supplemental/evidential_regression/models/._depth
- supplemental/evidential_regression/models/__init__.py
- __MACOSX/supplemental/evidential_regression/models/.___init__.py
- __MACOSX/supplemental/evidential_regression/._models
- supplemental/evidential_regression/trainers/
- supplemental/evidential_regression/trainers/deterministic.py
- __MACOSX/supplemental/evidential_regression/trainers/
- __MACOSX/supplemental/evidential_regression/trainers/._deterministic.py
- supplemental/evidential_regression/trainers/util.py
- __MACOSX/supplemental/evidential_regression/trainers/._util.py
- supplemental/evidential_regression/trainers/__init__.py
- __MACOSX/supplemental/evidential_regression/trainers/.___init__.py
- supplemental/evidential_regression/trainers/evidential.py
- __MACOSX/supplemental/evidential_regression/trainers/._evidential.py
- supplemental/evidential_regression/trainers/bbbp.py
- __MACOSX/supplemental/evidential_regression/trainers/._bbbp.py
- supplemental/evidential_regression/trainers/ensemble.py
- __MACOSX/supplemental/evidential_regression/trainers/._ensemble.py
- supplemental/evidential_regression/trainers/dropout.py
- __MACOSX/supplemental/evidential_regression/trainers/._dropout.py
- supplemental/evidential_regression/trainers/gaussian.py
- __MACOSX/supplemental/evidential_regression/trainers/._gaussian.py
- __MACOSX/supplemental/evidential_regression/._trainers
- supplemental/evidential_regression/README.md
- __MACOSX/supplemental/evidential_regression/._README.md
- supplemental/evidential_regression/edl/
- supplemental/evidential_regression/edl/__init__.py
- __MACOSX/supplemental/evidential_regression/edl/
- __MACOSX/supplemental/evidential_regression/edl/.___init__.py
- supplemental/evidential_regression/edl/losses.py
- __MACOSX/supplemental/evidential_regression/edl/._losses.py
- supplemental/evidential_regression/edl/layers.py
- __MACOSX/supplemental/evidential_regression/edl/._layers.py
- __MACOSX/supplemental/evidential_regression/._edl
- supplemental/evidential_regression/run_cubic_tests.py
- __MACOSX/supplemental/evidential_regression/._run_cubic_tests.py
- supplemental/evidential_regression/data/
- supplemental/evidential_regression/data/uci/
- supplemental/evidential_regression/data/uci/concrete/
- supplemental/evidential_regression/data/uci/concrete/Concrete_Readme.txt
- __MACOSX/supplemental/evidential_regression/data/
- __MACOSX/supplemental/evidential_regression/data/uci/
- __MACOSX/supplemental/evidential_regression/data/uci/concrete/
- __MACOSX/supplemental/evidential_regression/data/uci/concrete/._Concrete_Readme.txt
- supplemental/evidential_regression/data/uci/concrete/Concrete_Data.xls
- __MACOSX/supplemental/evidential_regression/data/uci/concrete/._Concrete_Data.xls
- __MACOSX/supplemental/evidential_regression/data/uci/._concrete
- supplemental/evidential_regression/data/uci/boston-housing/
- supplemental/evidential_regression/data/uci/boston-housing/boston_housing.txt
- __MACOSX/supplemental/evidential_regression/data/uci/boston-housing/
- __MACOSX/supplemental/evidential_regression/data/uci/boston-housing/._boston_housing.txt
- __MACOSX/supplemental/evidential_regression/data/uci/._boston-housing
- supplemental/evidential_regression/data/uci/yacht/
- supplemental/evidential_regression/data/uci/yacht/yacht_hydrodynamics.data
- __MACOSX/supplemental/evidential_regression/data/uci/yacht/
- __MACOSX/supplemental/evidential_regression/data/uci/yacht/._yacht_hydrodynamics.data
- __MACOSX/supplemental/evidential_regression/data/uci/._yacht
- supplemental/evidential_regression/data/uci/protein/
- supplemental/evidential_regression/data/uci/protein/CASP.csv
- __MACOSX/supplemental/evidential_regression/data/uci/protein/
- __MACOSX/supplemental/evidential_regression/data/uci/protein/._CASP.csv
- __MACOSX/supplemental/evidential_regression/data/uci/._protein
- supplemental/evidential_regression/data/uci/kin8nm/
- supplemental/evidential_regression/data/uci/kin8nm/dataset_2175_kin8nm.csv
- __MACOSX/supplemental/evidential_regression/data/uci/kin8nm/
- __MACOSX/supplemental/evidential_regression/data/uci/kin8nm/._dataset_2175_kin8nm.csv
- __MACOSX/supplemental/evidential_regression/data/uci/._kin8nm
- supplemental/evidential_regression/data/uci/power-plant/
- supplemental/evidential_regression/data/uci/power-plant/Readme.txt
- __MACOSX/supplemental/evidential_regression/data/uci/power-plant/
- __MACOSX/supplemental/evidential_regression/data/uci/power-plant/._Readme.txt
- supplemental/evidential_regression/data/uci/power-plant/Folds5x2_pp.xlsx
- __MACOSX/supplemental/evidential_regression/data/uci/power-plant/._Folds5x2_pp.xlsx
- supplemental/evidential_regression/data/uci/power-plant/Folds5x2_pp.ods
- __MACOSX/supplemental/evidential_regression/data/uci/power-plant/._Folds5x2_pp.ods
- __MACOSX/supplemental/evidential_regression/data/uci/._power-plant
- supplemental/evidential_regression/data/uci/wine-quality/
- supplemental/evidential_regression/data/uci/wine-quality/winequality-red.csv
- __MACOSX/supplemental/evidential_regression/data/uci/wine-quality/
- __MACOSX/supplemental/evidential_regression/data/uci/wine-quality/._winequality-red.csv
- supplemental/evidential_regression/data/uci/wine-quality/winequality.names
- __MACOSX/supplemental/evidential_regression/data/uci/wine-quality/._winequality.names
- supplemental/evidential_regression/data/uci/wine-quality/wine_data_new.txt
- __MACOSX/supplemental/evidential_regression/data/uci/wine-quality/._wine_data_new.txt
- __MACOSX/supplemental/evidential_regression/data/uci/._wine-quality
- supplemental/evidential_regression/data/uci/naval/
- supplemental/evidential_regression/data/uci/naval/Features.txt
- __MACOSX/supplemental/evidential_regression/data/uci/naval/
- __MACOSX/supplemental/evidential_regression/data/uci/naval/._Features.txt
- supplemental/evidential_regression/data/uci/naval/README.txt
- __MACOSX/supplemental/evidential_regression/data/uci/naval/._README.txt
- supplemental/evidential_regression/data/uci/naval/data.txt
- __MACOSX/supplemental/evidential_regression/data/uci/naval/._data.txt
- __MACOSX/supplemental/evidential_regression/data/uci/._naval
- supplemental/evidential_regression/data/uci/energy-efficiency/
- supplemental/evidential_regression/data/uci/energy-efficiency/ENB2012_data.xlsx
- __MACOSX/supplemental/evidential_regression/data/uci/energy-efficiency/
- __MACOSX/supplemental/evidential_regression/data/uci/energy-efficiency/._ENB2012_data.xlsx
- __MACOSX/supplemental/evidential_regression/data/uci/._energy-efficiency
- __MACOSX/supplemental/evidential_regression/data/._uci
- __MACOSX/supplemental/evidential_regression/._data
- __MACOSX/supplemental/._evidential_regression
- supplemental/README.md
- __MACOSX/supplemental/._README.md
- __MACOSX/._supplemental
