# Supplementary material
Source: ML conference proceedings conference paper supplement (https://proceedings.neurips.cc/paper_files/paper/2020/hash/aab085461de182608ee9f607f3f7d18f-Abstract.html)
Supplement: Supplementary file 16 [file aab085461de182608ee9f607f3f7d18f-Supplemental.zip › supplemental/evidential_regression/data/uci/kin8nm/dataset_2175_kin8nm.csv]

theta1	theta2	theta3	theta4	theta5	theta6	theta7	theta8	y
-1.5119208e-02	3.6074091e-01	4.6939777e-01	1.3096745e+00	9.8802387e-01	-2.5492554e-02	6.6407094e-01	6.2762996e-02	5.3652416e-01
3.6047801e-01	-3.0139478e-01	6.2918307e-01	-1.4401463e+00	-7.4163685e-01	-1.1967495e+00	-1.0384439e+00	-7.1746120e-01	3.0801430e-01
1.5632379e+00	-1.2947529e+00	7.8987171e-02	1.4329368e+00	1.1491364e+00	-1.2921402e+00	1.5629882e+00	-9.3773069e-01	5.1889978e-01
1.9948468e-01	9.0115659e-01	-1.3563042e+00	-8.0524638e-02	-9.7662848e-01	8.2989378e-01	-8.5564902e-01	9.3062954e-01	4.9415079e-01
6.5973667e-01	1.2055156e-01	-8.7562194e-03	6.4883889e-01	6.2683171e-01	-6.4653937e-01	1.3180738e+00	-8.9917230e-01	4.7021765e-01
1.5136662e+00	-2.1721217e-01	4.8907586e-01	5.6705131e-01	1.4003115e+00	3.8172143e-01	1.4959806e+00	-1.3281023e+00	2.8517032e-01
-4.2916947e-01	-1.5432012e-01	1.4916375e+00	-1.1607759e+00	1.3649491e+00	4.5987858e-01	7.8013127e-01	-4.0000056e-01	5.2743972e-01
4.5435426e-02	1.2972702e+00	4.1723630e-02	1.2943647e-01	7.8913725e-01	8.6135091e-01	-1.3414275e+00	1.9887659e-01	1.1177628e+00
2.2619045e-01	5.6802604e-01	6.7388457e-01	1.4566167e+00	-7.7444761e-01	2.6581168e-01	-1.3026241e+00	-1.3569806e-01	5.7456790e-01
2.5574014e-01	-4.8646636e-01	5.3642514e-01	-1.0744508e+00	-5.2253870e-01	1.5208582e-01	5.5605189e-01	1.1900247e-01	7.9019284e-01
5.2576581e-01	1.5255593e+00	-6.7358732e-01	-4.1959610e-01	-1.5565182e+00	-1.1500165e+00	-6.7409671e-01	-1.1199496e+00	6.7938934e-01
-7.5409541e-01	1.5374519e+00	1.3178684e+00	7.2393068e-01	-3.6011512e-01	-1.2494858e+00	-9.6025625e-01	1.4309194e+00	5.7751391e-01
-8.9679110e-01	3.5512910e-01	1.1862098e+00	-2.8548339e-01	1.3942862e+00	1.4385891e+00	-6.6534825e-01	5.7069010e-01	5.4140341e-01
9.9347572e-01	-3.7127026e-01	8.1449761e-02	-9.0731517e-01	6.2903747e-01	6.6936080e-01	1.5617882e+00	3.0619354e-01	6.2963212e-01
-2.1854018e-01	-7.3622589e-01	-8.0825886e-01	4.4664244e-02	7.7353236e-01	-9.6277706e-02	9.6804199e-01	2.6606137e-01	1.2299687e+00
-4.8304739e-01	9.8492065e-01	-1.6008452e-01	-1.6868901e-01	8.4794730e-01	-2.1918561e-01	-4.2659888e-01	1.2071212e+00	9.4067874e-01
-7.0202732e-01	5.0975332e-01	-1.3372290e+00	-1.4395670e+00	1.1860183e+00	1.2356681e+00	-7.3290792e-01	-3.1971355e-01	1.3044195e+00
8.4890688e-01	3.0083374e-01	1.4616293e-01	-1.3981803e+00	4.0777898e-03	-1.1944747e+00	2.0142198e-01	-1.3022388e+00	6.1655412e-01
-1.5359397e+00	1.2900445e+00	-1.6501629e-01	-1.0376638e-01	-5.7962538e-01	-7.5990029e-01	-1.3377046e+00	7.4890609e-01	6.3863788e-01
-7.1351500e-02	-1.4938764e+00	5.9745815e-01	-4.1770934e-01	3.1498155e-01	-1.0700519e+00	-1.5633567e+00	-1.4971342e+00	6.2526404e-01
8.8373901e-01	2.7981876e-02	9.4892602e-01	1.0187642e+00	3.1125447e-01	1.2560535e+00	9.4559753e-01	-1.3189854e+00	3.7683645e-01
-4.4847905e-01	-9.4751475e-01	-1.2662242e+00	6.9072685e-01	5.0203626e-01	-1.0119485e+00	-6.5953250e-01	-1.1106774e+00	1.1351477e+00
-9.0662327e-01	-1.4723249e-01	-2.8089623e-01	8.6126749e-01	-5.9439056e-01	7.6346047e-01	-1.2239095e+00	1.8785035e-01	8.8741745e-01
-8.9293850e-01	1.0384792e+00	7.9082759e-01	-1.1362771e+00	3.4250282e-01	1.2157264e+00	9.0241171e-01	-9.9826331e-02	4.6601327e-01
-2.2918853e-01	-9.6954996e-01	-6.3915664e-01	3.3313937e-01	1.0471561e+00	-2.0584408e-01	-7.7568326e-01	-1.7066987e-01	1.3441938e+00
-3.7902806e-01	2.1493572e-01	-1.2004137e+00	7.5536518e-01	3.5027565e-01	-7.2794820e-01	7.0092802e-01	-1.7440831e-01	1.0074333e+00
8.2526422e-01	-4.0683440e-01	-4.4819061e-02	2.4662562e-01	-2.6184741e-01	-1.2635992e+00	-4.7527851e-01	-1.7452203e-01	8.1236277e-01
8.4224076e-02	-1.5601190e+00	7.0828526e-01	1.2761265e+00	5.0184828e-01	-1.4609317e-01	1.0642746e+00	1.0557551e+00	5.8446871e-01
-1.3042462e+00	-1.1884058e+00	6.5572137e-01	2.0566060e-01	-6.1223676e-01	1.3375583e+00	-9.6577055e-01	3.5989512e-01	8.7028780e-01
1.5674126e+00	7.0971984e-01	1.9562323e-03	7.8575701e-01	-1.1473617e+00	-8.9409122e-01	9.0356660e-01	1.1913925e+00	5.8425999e-01
1.2487533e+00	-3.6601100e-01	1.4624705e+00	-1.0375058e+00	-6.1253707e-01	-7.5348705e-01	-2.1497101e-01	-7.7730285e-01	5.2122202e-01
-1.1845123e+00	-3.0847449e-01	-8.0024553e-02	-1.5212140e+00	8.8574597e-02	-9.6783148e-02	-1.8618583e-01	-1.3866696e+00	1.0426291e+00
1.7493348e-01	-9.0282173e-01	-3.7100410e-01	-7.6216340e-01	-4.4167289e-01	7.1061882e-01	-1.9889709e-01	-1.4221960e+00	8.5285490e-01
-4.2377231e-01	1.6774687e-01	5.9544078e-01	-1.4069705e+00	3.8723050e-01	-9.6475621e-01	-2.0886786e-01	1.5300024e+00	1.5939153e-01
-3.5073654e-01	1.3129634e+00	-1.5410831e+00	-1.8606166e-01	-1.1970095e+00	-8.9801631e-01	-1.2831606e+00	8.1488019e-01	1.1956055e+00
-1.2012340e+00	4.2858738e-01	1.4481101e+00	-1.2536457e+00	6.2056057e-01	-7.4899880e-01	9.5349152e-01	1.4890531e+00	6.9272769e-01
-1.2659781e+00	-4.0383153e-01	4.6765658e-01	6.3863535e-01	-3.2619221e-01	-6.1059077e-02	6.7781217e-02	5.8754522e-01	8.0980840e-01
7.1286766e-01	-1.3563816e+00	-3.6063826e-01	-1.2777530e+00	-2.3323602e-01	1.0808974e+00	-1.1992131e+00	8.4673996e-01	6.0346477e-01
-8.6753878e-01	-1.3090537e+00	-1.1149833e+00	7.3341353e-01	7.0986103e-01	-1.1879907e+00	1.2833355e+00	-2.5627032e-01	1.1264575e+00
-5.9283290e-01	-6.9193034e-01	7.5754084e-02	-1.1283005e+00	-1.1345393e+00	1.4034904e+00	-1.1559226e+00	-1.1682848e-02	8.1107379e-01
1.3893216e+00	9.0270106e-01	8.5387046e-01	-6.9360648e-01	1.2659674e+00	1.3850401e+00	1.7653245e-02	1.5667037e+00	6.6601999e-01
-1.1304668e+00	9.4578989e-01	2.0556672e-01	1.0062508e+00	-8.9252680e-01	-8.3298842e-01	1.3883847e+00	-1.2408177e+00	1.6067133e-01
5.9678293e-01	-5.6814579e-01	-7.9203232e-01	8.6363200e-01	4.0692487e-01	-1.0995326e+00	-1.1678187e+00	-5.3153754e-01	9.0508746e-01
-9.7462155e-01	-1.5262471e+00	-7.5916994e-01	9.0498158e-01	-6.0898849e-02	-9.9593113e-01	1.1419747e+00	1.1381542e+00	9.9087222e-01
-2.0037867e-01	-5.3073440e-01	-1.3614030e+00	-1.5661481e+00	6.3224943e-01	-2.0885547e-01	1.1797135e+00	-2.0080303e-01	1.1605411e+00
2.2974055e-02	-1.0714748e+00	-8.8033648e-01	1.1532746e+00	1.3497381e+00	-1.0748819e+00	8.5289745e-01	-8.2606505e-01	1.0504132e+00
-2.9094736e-01	-6.6865770e-01	1.0862226e+00	-5.4009911e-01	-3.9187098e-01	-1.3819579e+00	-4.3987739e-01	-9.7741361e-01	7.3385537e-01
1.5074016e+00	-6.5306035e-01	3.4817918e-01	-1.3846075e+00	-1.3973144e+00	-7.7201578e-01	-8.5183699e-01	-2.6102489e-03	2.2132653e-01
1.0950623e+00	7.3939005e-01	-9.3969724e-01	-1.3214585e+00	-1.2588476e+00	-4.9151434e-01	-5.8664119e-01	1.1184408e-01	5.7695208e-01
1.2628763e+00	-1.2120054e+00	-7.0516883e-01	1.3077102e+00	1.1744834e+00	1.5072309e+00	-1.3607575e+00	1.0910499e+00	1.1722645e+00
5.6168370e-01	-8.7909180e-02	1.4565041e+00	1.0292230e-01	9.1615371e-01	1.3676163e+00	5.4391753e-01	-2.0125735e-01	3.5994711e-01
-2.6791663e-01	-9.4103310e-01	1.7475850e-01	-1.2024764e+00	8.4979754e-01	-1.5061953e+00	-4.1273488e-01	9.6301508e-01	2.8333815e-01
-9.7256636e-01	-1.1658314e+00	-2.2293939e-01	-1.5578492e-01	8.6707999e-01	3.2972014e-01	-1.9846652e-01	-9.0846116e-02	1.3459304e+00
-2.1630768e-01	-1.4287008e-02	9.7768320e-01	-1.3304892e+00	-8.3494123e-01	-1.6296822e-01	7.4454418e-01	-3.6647139e-02	6.7822628e-01
-6.6051887e-01	-1.3607004e+00	1.3919586e+00	3.2525473e-01	6.3711153e-01	4.6188751e-01	5.9054703e-01	-1.7630119e-01	2.4686742e-01
1.0477574e+00	1.5028454e+00	-7.9168780e-01	1.8506573e-01	1.3857981e+00	6.7898846e-02	1.0327992e+00	-5.7215495e-01	8.1654611e-01
1.0310845e+00	-8.2002541e-02	-1.2519808e+00	2.2291916e-01	-6.5890260e-01	7.7777502e-01	9.5615484e-01	2.0680374e-01	7.4152645e-01
4.1286281e-01	9.4246860e-01	3.4674719e-01	-1.3177742e+00	-6.1878627e-02	-1.0232295e-01	8.4790161e-01	1.1490335e+00	7.0528018e-01
-7.9289612e-01	1.5956438e-01	1.2557918e-01	3.9659531e-01	-1.2691079e-01	-1.2905658e+00	4.1813345e-01	4.3647951e-01	9.9175241e-01
4.3099733e-01	-1.1215383e+00	-5.4106470e-01	-8.8220492e-01	1.5182817e-01	-9.8401979e-01	-1.7392956e-01	2.9223178e-01	7.8589652e-01
-7.4058346e-01	-1.3830495e-01	1.2363460e+00	1.0992216e+00	8.0288442e-01	-1.0769531e+00	-1.5529457e+00	1.2301933e+00	5.9385283e-01
3.8858886e-03	2.8723744e-01	7.7328074e-01	-1.0895073e+00	9.3797376e-01	1.5066037e+00	-6.3094508e-03	1.0373619e+00	8.2834900e-01
-6.6331628e-01	-1.0281866e+00	-2.3942031e-01	9.9450765e-01	1.3123861e-02	2.5119485e-01	7.7120996e-01	-8.9723851e-01	5.1830445e-01
1.1555610e+00	1.1693638e+00	4.4307860e-01	1.4171560e+00	6.6124222e-01	-4.6871404e-01	-4.8551777e-01	-2.4288656e-01	8.5680827e-01
1.8763412e-01	-3.0702443e-01	1.2474985e+00	-1.4146745e+00	-1.4568569e+00	1.4375607e+00	-1.3810736e+00	-1.2655878e+00	5.0022092e-01
-5.9235426e-01	1.4771964e+00	-2.8240109e-01	-8.6088572e-01	1.7999484e-01	-9.0582612e-01	1.5238280e+00	9.8944150e-01	9.8412045e-01
9.1030553e-03	-7.6680414e-01	6.3133861e-01	1.2694334e+00	-1.8044583e-01	-6.1585928e-02	7.1398804e-01	1.0934046e+00	6.0887038e-01
-9.4298964e-01	-8.6410297e-01	-1.3918973e+00	8.1124675e-01	-1.1161552e+00	-1.4907009e+00	-8.8698762e-01	-1.4663998e+00	1.1949203e+00
5.0799229e-01	6.0424631e-01	-1.3197722e+00	1.1199921e-01	-7.7152273e-01	-8.0352348e-03	-7.4371145e-01	1.3135971e-02	6.6761958e-01
-1.0224892e+00	-1.2012854e+00	1.3735913e+00	5.5676446e-01	1.5118968e+00	4.0292521e-02	8.3889074e-01	8.6477559e-01	4.1543189e-01
-4.6488361e-01	1.0125032e+00	1.5262201e+00	-1.2641585e+00	1.2485594e+00	-1.3876056e+00	-2.3123834e-01	1.2757326e+00	5.0710849e-01
-1.5792020e-01	-8.6582970e-01	7.7296072e-02	-1.2026410e-01	-1.3010763e+00	-1.4442792e+00	-2.7269168e-01	-1.3147167e-01	8.3476123e-01
4.8097814e-01	-1.4255450e-01	-1.5042822e+00	-1.2345757e+00	1.4364149e+00	1.0854871e+00	4.5458632e-01	-1.1047273e+00	7.1203666e-01
4.8174648e-01	1.1217509e+00	1.0665344e+00	7.0526164e-01	-1.3149333e+00	5.5303227e-01	-1.2108917e-01	-3.3958088e-01	1.5981160e-01
8.2880370e-01	5.6904508e-01	-6.8441910e-01	1.0328733e-01	1.0203120e+00	-1.1593092e+00	6.0631807e-01	9.3795739e-01	1.0360063e+00
-1.1796206e-01	9.3268978e-01	1.4804833e+00	-1.3505246e+00	1.5705981e+00	-3.5140067e-01	-9.3868987e-01	-2.6205680e-01	6.4134995e-01
-2.4343913e-01	-8.3015231e-01	1.0696464e+00	-2.6075677e-01	1.3804459e+00	2.0308416e-01	5.1770718e-01	1.2426581e-01	5.6168099e-01
-1.1278375e+00	-5.5685553e-01	1.3545609e+00	-1.7238347e-02	4.9209838e-01	1.4658005e+00	-1.1070639e+00	-6.2359969e-01	5.2661844e-01
8.0495439e-01	-2.6644790e-01	-1.0165199e+00	-6.9837606e-01	-1.1160108e+00	-6.6112087e-01	1.2305666e+00	-4.8689141e-01	7.0760228e-01
1.1704253e+00	-1.4203336e+00	-6.6985287e-01	-6.1630658e-01	-1.4848034e+00	3.5472859e-01	1.0278630e+00	6.6489041e-01	8.7304188e-01
-1.3152255e+00	1.4151630e+00	1.2508589e+00	-4.3377262e-01	-1.4205588e+00	-8.1946320e-01	-3.2539761e-01	1.6808578e-01	6.9099652e-01
-7.4905717e-01	-3.5344253e-01	-3.5245113e-01	1.2201957e+00	7.7240689e-01	2.4200082e-02	5.5511342e-01	7.2593414e-01	9.6046348e-01
-1.0421155e+00	4.4315067e-01	1.3976813e+00	-4.8783664e-01	7.8173410e-01	1.4653206e+00	-7.3886340e-01	-1.1707443e+00	1.9630649e-01
-4.5623584e-01	-6.8292554e-01	1.1409926e+00	4.8648138e-01	4.6462142e-01	6.9866563e-01	6.3851960e-01	-9.0460691e-01	3.3287683e-01
6.7195499e-01	1.4500111e+00	3.8057436e-01	-1.2731219e+00	-1.1072133e+00	-8.0005107e-01	-8.1602995e-02	-1.5614873e+00	3.8816368e-01
-4.7805307e-01	1.0025848e+00	3.0585252e-02	2.8540473e-02	-1.2811208e+00	-4.4171748e-01	1.3744585e+00	9.4867863e-01	4.7022107e-01
1.5561313e+00	-1.0604639e+00	-1.1748575e+00	-9.8394093e-01	6.7848650e-01	-3.6228766e-01	3.9375915e-01	8.5893514e-01	1.1436294e+00
1.3935437e-01	-9.6126964e-01	-9.2022690e-01	2.4844799e-01	-6.5866879e-01	-5.6219968e-01	-1.4257179e+00	5.0460795e-01	1.1052736e+00
-1.4992423e+00	1.1521672e+00	-1.9283292e-01	4.8875168e-01	7.2608987e-01	1.0206682e+00	-1.1139881e+00	-1.3544164e+00	8.0296923e-01
9.4850184e-01	-3.0283171e-01	1.1807699e+00	-8.1538137e-01	1.4465208e+00	1.2740674e+00	1.0940395e+00	3.0407523e-01	3.9646365e-01
1.0292799e+00	-3.1240928e-01	-2.4116235e-01	-4.8752757e-01	-1.1104684e+00	1.5485977e-01	-2.2037886e-01	-7.7887631e-01	6.1050498e-01
1.4973256e+00	-1.0614700e+00	-5.6112627e-01	-6.0227556e-01	5.6014655e-01	1.4894912e+00	3.0228653e-02	4.4251264e-01	1.0908929e+00
1.3939725e+00	9.7873957e-01	2.1184522e-01	-2.3384510e-01	-9.7007112e-01	-1.4740847e+00	-8.8503912e-01	1.1601032e+00	7.2730303e-01
-1.5029446e+00	2.9681700e-01	1.0581945e+00	-1.0217010e-01	8.8057459e-01	-3.4261916e-01	5.8868009e-01	1.1305299e+00	6.8618572e-01
1.5559394e+00	-2.4585931e-01	5.1904372e-01	1.2783853e+00	-2.2591837e-01	1.3906062e-01	1.0709263e+00	4.6351825e-01	2.6131916e-01
5.6499437e-02	-9.6312267e-01	-6.3501746e-01	4.6965344e-01	1.1755295e+00	-1.5303216e-01	8.7444096e-01	-7.9856910e-01	7.3648214e-01
8.2506353e-01	1.4241930e+00	-7.4812389e-01	-1.3569353e+00	-3.5132006e-01	9.5279822e-01	3.5880534e-01	-6.6697001e-01	8.8095717e-01
-1.4718711e-01	6.1755526e-01	-1.0643877e+00	-1.1897192e+00	1.5578670e+00	9.8195229e-01	-1.4165824e+00	-5.6241986e-01	1.2203113e+00
-1.3402690e+00	-5.7081828e-01	-9.3588222e-01	6.2588172e-01	1.0374898e+00	8.8600484e-01	-1.5116445e+00	4.6168087e-01	1.3424423e+00
-6.8236149e-01	6.8116138e-01	5.8194064e-01	1.1418709e+00	1.2516638e+00	-6.5828070e-02	-1.4980789e-01	-2.6348415e-01	6.0816582e-01
1.5052708e+00	3.1561723e-01	8.9847309e-01	-5.6477752e-01	6.0894348e-01	-5.3175131e-01	-1.4054656e+00	1.2675084e+00	2.3973652e-01
-1.5867039e-01	1.5703312e+00	-9.9867638e-01	-1.4643619e+00	-7.9574842e-01	6.8676072e-01	-2.4359828e-02	-1.2546194e-01	8.0560810e-01
4.3890134e-01	3.7100260e-02	7.7555788e-01	-2.9289817e-01	-3.8381155e-01	1.7600921e-01	-1.0085834e+00	-6.3015378e-01	6.5753671e-01
1.5530054e-01	1.5087259e+00	3.3343775e-01	1.3616216e-01	-1.0309951e+00	-1.1934523e+00	7.7206510e-01	-6.8573093e-01	5.9127035e-01
-5.2724246e-01	1.3620264e+00	-5.1305090e-01	1.3980234e+00	1.0906238e+00	7.1565904e-01	1.3204002e+00	1.4236666e+00	6.3638754e-01
1.0687718e+00	-1.2080732e+00	8.2528847e-01	6.0830119e-01	-1.0788423e+00	-1.0768386e+00	-2.4458117e-01	1.1953192e+00	6.4520210e-01
-7.7881022e-01	2.7686773e-02	4.9168422e-01	9.7568221e-01	1.1707340e+00	2.8834976e-01	-1.4724769e+00	-7.5449923e-01	8.2609617e-01
1.5532423e+00	3.7587845e-01	1.3479652e+00	-8.2279604e-01	7.3089789e-01	-1.1830129e+00	1.5478132e+00	-1.4005758e+00	4.9029809e-01
-1.2916605e+00	-3.5363455e-01	1.2262338e+00	5.5774463e-01	5.7354046e-01	2.4231856e-01	-1.4320810e+00	4.7546514e-01	7.8361273e-01
-5.3316283e-01	3.5736985e-01	4.6331185e-01	-4.9845804e-01	1.0883259e+00	1.1440408e+00	-1.2441841e+00	-1.0690241e+00	9.0718276e-01
-1.0453584e+00	-4.1006957e-01	-1.1258952e+00	1.0432506e+00	1.1416875e+00	1.3471563e+00	-5.6209859e-01	-3.1910533e-01	1.2048732e+00
-1.5527081e+00	6.1496962e-01	-1.1079804e+00	6.8403653e-01	-5.0628027e-01	1.9712585e-01	-4.2184618e-01	-5.0456661e-01	6.4780456e-01
8.4489749e-01	-4.5502470e-02	1.5346334e+00	1.5145038e+00	1.5220159e+00	-1.2861726e+00	6.0588783e-01	-1.0924631e+00	5.9321578e-01
1.9325095e-01	-1.3530002e+00	1.0821226e-01	1.0809637e+00	-1.4671354e+00	5.9664917e-01	1.2549983e+00	-1.5600715e+00	8.1586334e-01
-4.3811988e-01	-1.0263502e+00	-2.5863835e-01	-7.3425411e-02	2.1582538e-01	-8.1140813e-02	1.0315795e-01	-3.8860669e-01	1.2085504e+00
4.1237820e-01	6.1679727e-01	1.0294942e+00	5.8502480e-01	-1.1622742e+00	-2.8244047e-01	-3.8340505e-01	5.8500695e-02	6.3688665e-01
4.8705554e-01	-7.4411731e-01	-1.1833092e+00	-6.7314160e-01	7.9852561e-02	-3.0525950e-02	-4.8206813e-01	-9.7324146e-02	1.0935504e+00
-1.0479887e+00	3.0075758e-01	1.5455748e+00	-6.1580942e-01	6.2192128e-01	-9.7004122e-01	4.8453591e-02	1.0428544e+00	7.0179846e-01
1.3635266e+00	1.0105331e-02	-1.3539912e+00	-1.5027901e+00	5.5225711e-01	1.3830399e+00	6.8701233e-01	3.0815474e-01	9.0773938e-01
-1.1270913e+00	1.9429810e-01	1.1663177e+00	1.0111553e+00	1.5206004e+00	1.0783970e-01	1.2632785e+00	-1.3296239e+00	2.7140111e-01
7.7993254e-01	1.4534560e+00	-1.2366025e+00	-1.5299027e+00	-1.2458843e-01	-2.3704243e-01	1.0381274e+00	-8.4116124e-01	8.6553581e-01
-1.5398671e+00	-7.9017606e-01	1.1987245e+00	8.6184829e-01	1.4846294e+00	-4.3269992e-01	-5.9820021e-01	-2.2996895e-01	7.9507205e-01
-1.0659627e-01	-9.7685789e-01	-7.1121725e-02	-7.9959151e-01	-1.5042684e+00	3.9944792e-01	-8.5444516e-01	-9.2915150e-01	5.8606676e-01
-8.5574298e-01	-8.7350408e-02	-1.5376231e+00	9.9879285e-01	1.2989578e+00	-6.2281893e-02	-4.3977255e-01	6.0778002e-01	1.2852731e+00
-2.6104328e-01	-9.7453340e-01	-8.9607085e-02	1.1819326e+00	6.5613404e-01	-6.2142613e-01	9.1020929e-01	-1.5004437e+00	4.4544464e-01
1.4506050e+00	1.2812990e+00	-1.2033910e+00	4.5028039e-01	6.5459227e-01	1.4865597e+00	1.4729470e+00	-3.9295440e-01	5.8316327e-01
1.5598181e+00	-8.2466194e-01	1.8029455e-01	-2.3426728e-01	-1.2511044e-01	-4.7734902e-01	6.9971296e-02	-7.5686509e-01	9.0976303e-01
-7.2794600e-01	6.1359921e-01	-1.4264137e+00	-9.1450042e-01	-1.0057325e+00	8.2262741e-01	1.0519265e+00	-3.2283754e-01	1.0457684e+00
-1.2266692e+00	-1.0867687e+00	-2.4218089e-01	-1.3372774e+00	1.5633194e+00	-2.5044885e-01	-1.1539335e+00	-3.9998776e-01	8.9839244e-01
-1.4977389e+00	-1.0106472e-01	1.1698666e+00	-6.6730670e-01	1.5693395e+00	4.4024998e-01	-1.1092513e+00	4.1396598e-01	6.7762025e-01
1.0836986e+00	1.0067941e+00	-1.2804221e+00	6.2055771e-02	-9.2259368e-01	8.3065906e-01	-9.7572595e-01	-1.1015158e+00	4.1251925e-01
-1.2318182e+00	5.7004762e-01	-1.4412160e-01	-3.7410049e-02	8.6939083e-01	-3.5089412e-01	8.7686020e-02	2.3008467e-01	1.1067183e+00
-7.3675948e-02	-1.0672386e+00	-8.3827869e-02	-4.3216425e-01	3.0423528e-01	-7.0803395e-01	3.3198612e-01	-2.6746562e-01	1.1686622e+00
-4.8414823e-01	1.4150708e+00	-1.4614892e+00	-2.2309867e-02	-1.2304747e+00	4.2635998e-01	2.2223983e-01	3.2442811e-01	3.4716132e-01
-3.5433851e-01	1.2391771e+00	8.6347698e-01	-1.1124119e+00	5.1555338e-01	-1.4062425e-01	-1.6877020e-01	-1.1415973e+00	8.9832405e-01
1.0923735e+00	1.2313284e+00	1.4411602e+00	-6.8926296e-01	3.9317782e-01	-9.9417639e-01	3.3740787e-01	-1.1191387e+00	6.8807487e-01
5.4519505e-02	1.2658265e+00	-9.9836079e-02	-1.3904924e+00	1.3703378e+00	1.0087177e+00	2.3928143e-01	-6.4957728e-01	9.0528959e-01
-1.0357329e+00	-1.1972036e-01	-3.3449481e-01	3.0256475e-01	2.5107218e-01	1.4842098e+00	3.6437130e-01	-4.1093017e-01	4.8907374e-01
2.1509921e-03	-1.5207102e+00	-1.5450299e+00	-1.0327312e+00	6.1118734e-01	8.6824294e-01	1.0243700e+00	-1.2827572e+00	6.9617017e-01
-1.5473878e+00	1.4220871e+00	1.0875758e+00	1.8604652e-01	-7.8232439e-01	-1.3870398e-01	6.5922903e-01	1.4503427e+00	5.5841646e-01
-8.4257301e-01	-2.1915287e-01	1.1002745e+00	9.9919210e-01	-9.6073079e-01	-1.3599942e-01	-7.3492914e-01	2.9156198e-01	7.6898642e-01
1.1751280e+00	-1.3557599e+00	8.9992586e-01	-1.5326368e+00	7.8393589e-01	1.3371376e+00	7.8824267e-01	-6.0225848e-01	6.9788498e-01
-8.1603565e-01	-2.8483447e-01	1.4268282e+00	-1.1082219e+00	-2.2901051e-01	1.4593896e+00	-1.0159638e-01	5.3334146e-02	4.7800018e-01
1.0824104e+00	5.7430092e-01	9.2456752e-01	6.1679500e-01	-5.2857195e-01	1.5465673e+00	1.4960931e+00	1.0330931e+00	4.2453349e-01
-8.9100972e-01	1.3029562e+00	8.8907340e-01	-7.8222757e-01	7.1523600e-01	-3.8161028e-01	-4.7116792e-01	-3.8614597e-01	8.9823042e-01
7.7176668e-01	-1.2581495e+00	1.2420251e+00	6.6652812e-01	1.2380156e+00	1.4082372e+00	1.0357850e+00	5.7502518e-01	4.0411978e-01
-5.5346483e-01	3.4130279e-01	-1.1678894e+00	-5.8129761e-01	5.5935879e-01	-5.1701561e-01	8.7379488e-01	9.0919912e-01	1.1713728e+00
1.7245843e-01	-2.7222079e-01	-4.6991607e-02	4.8425303e-01	1.4979454e+00	1.6387984e-01	-1.0750869e+00	2.0293719e-01	1.0360416e+00
-1.1811045e+00	-1.0559447e+00	-1.2481761e+00	-1.0259455e+00	-7.5450387e-01	-8.4834628e-01	1.4558387e+00	-1.0042361e+00	1.0250167e+00
9.0124034e-01	-4.0572163e-01	1.4605902e+00	1.1364408e+00	-1.4785912e+00	1.5330751e+00	1.5568006e+00	-1.5602348e+00	5.4436687e-01
1.5282708e+00	1.4342202e+00	-2.6529727e-01	-7.2287625e-01	-6.8504477e-01	-9.4957241e-01	-1.1769906e+00	7.0557146e-03	7.4079821e-01
-1.4509235e-02	-5.0180728e-01	-9.3131784e-01	-8.4231014e-01	3.8965722e-01	-1.7285596e-01	9.2812130e-01	-7.9512537e-01	1.0383610e+00
1.1875074e+00	1.3013686e+00	-1.2444067e+00	-6.8999636e-01	-1.2517455e+00	7.8306954e-01	9.2712942e-01	6.6297878e-01	6.3831186e-01
-1.0182816e-01	3.3408529e-01	-1.1612861e+00	-1.1502582e+00	1.1590817e+00	9.1817822e-01	-3.5367464e-02	-5.4485422e-01	1.0474024e+00
7.4210419e-01	9.4545316e-01	9.8024202e-01	9.7163757e-01	-3.3062130e-01	3.1827360e-01	-6.5996171e-01	3.7776794e-01	6.4949058e-01
4.2225197e-01	5.5616811e-02	4.1571240e-01	3.1396445e-01	7.2522594e-01	-9.0785677e-01	9.8713730e-01	-1.2945734e-02	7.1858947e-01
-6.8934867e-02	-1.4428737e+00	-2.3696616e-02	-1.0751023e+00	-5.0719120e-01	3.6676985e-01	6.5878826e-02	-8.0906500e-01	1.0205836e+00
6.5937547e-01	-4.2469586e-01	7.1325022e-01	1.1971315e+00	-1.2216849e+00	4.9610789e-01	1.3848064e+00	-1.1424275e+00	5.5120546e-01
-1.4154104e+00	-1.6486067e-01	-7.2108075e-01	1.4292305e+00	5.9207065e-01	2.9843200e-01	1.5235370e+00	6.3567505e-01	7.9384142e-01
-6.6323670e-01	7.1483241e-02	1.0603134e+00	4.5915044e-01	1.5075215e+00	-1.3767879e+00	-1.0347524e+00	-7.6607478e-01	7.6012863e-01
-6.4843533e-01	1.3304425e+00	-1.5682681e+00	1.1898534e+00	-3.1604021e-02	1.2978002e+00	7.7350649e-01	-1.1721980e+00	9.2326194e-01
-6.7618509e-02	-1.1098343e+00	8.0454987e-02	-1.5134861e+00	-2.3962706e-01	5.0377918e-02	4.1312153e-01	-2.0398421e-01	9.4309060e-01
7.9226518e-01	-1.3500300e+00	1.3221295e+00	3.1473619e-01	1.0977780e-01	-1.5283458e+00	4.1386725e-01	-8.8510231e-01	5.8502247e-01
1.5311321e+00	-1.3722119e+00	5.4623085e-01	-6.7080589e-01	9.2058282e-01	-1.2464240e+00	3.8068243e-01	-4.7324385e-01	7.9821997e-01
9.5217517e-01	-3.3379142e-01	7.6809246e-01	9.4142434e-01	-1.0829560e-01	-5.0869444e-01	-1.2945987e+00	7.0314038e-01	6.9610955e-01
-6.4862618e-02	8.5204381e-01	5.2580235e-01	1.4582886e+00	-1.1420735e+00	-1.3538082e+00	3.5081570e-01	-9.9124286e-01	5.2421871e-01
-1.3374181e-02	9.2104842e-01	-1.4010225e-01	-1.2498937e+00	3.0174712e-01	1.1008623e+00	-6.0989258e-01	4.7166340e-02	1.0571889e+00
1.4148163e+00	1.4338339e+00	1.4959888e+00	8.6738604e-01	9.3323801e-01	1.3527371e+00	5.5218314e-01	1.0433354e+00	4.0101153e-01
1.0305292e-01	-7.1098742e-01	9.1841005e-01	1.1672939e+00	-1.0409268e+00	-2.5437162e-01	2.7734543e-01	-1.0317898e+00	3.9875179e-01
9.9282204e-01	1.0528361e+00	1.0729509e+00	-5.3770568e-01	6.7305690e-01	4.8385656e-01	-7.7884853e-01	2.9952059e-01	8.3248063e-01
1.3614540e+00	1.5663848e+00	3.4461354e-01	1.1427659e+00	-8.0781776e-01	-1.4061792e+00	9.0935102e-01	1.2110993e+00	8.1521701e-01
-1.4033819e+00	-3.1726261e-01	-1.1770330e+00	-1.2302034e+00	9.7038041e-01	5.4738442e-01	-3.8561230e-01	5.6698818e-01	1.4275434e+00
4.3734336e-01	-9.5003098e-01	2.1479559e-01	-1.2071862e+00	1.1761459e+00	1.3066762e+00	1.1973036e-01	9.1980252e-01	9.4017212e-01
-8.9702576e-01	1.5448228e+00	3.7951963e-01	-7.7252648e-01	5.8337692e-01	-1.5677124e+00	-1.4526810e+00	-6.5650124e-01	2.3659981e-01
1.9122203e-01	-1.4271463e+00	1.1533876e+00	3.4982512e-01	-9.4713463e-02	-4.4326952e-03	1.2482940e+00	-5.4290862e-01	2.4862364e-01
1.9298047e-02	1.1232050e-02	1.3581114e+00	-1.5507281e+00	9.3830042e-01	8.9791582e-01	5.2077447e-01	-1.4801651e+00	3.5373448e-01
7.5822500e-01	2.8150882e-01	-1.0331952e+00	-4.3434974e-01	-7.7989747e-01	-9.3997414e-01	1.7939833e-01	1.1367613e+00	7.4623301e-01
1.1877639e+00	8.0262142e-02	-1.3287174e+00	9.4517500e-01	-1.0121967e+00	9.2411452e-01	-7.8119860e-01	1.5226253e+00	6.7438727e-01
1.0675134e+00	1.2225798e+00	-1.3119543e+00	-1.4777884e+00	-2.6553697e-01	-4.4126140e-01	-8.8910839e-01	-6.5092445e-01	7.8008234e-01
6.1857385e-02	-1.2580129e+00	8.2244105e-01	2.4259153e-01	1.3232442e+00	1.0198771e+00	1.3115386e+00	-1.0616523e+00	5.8315783e-01
-2.3009629e-01	-5.0356893e-01	-2.4095402e-01	-5.5148062e-01	4.3135884e-01	5.4480113e-01	-1.5267841e+00	1.0568820e+00	8.1275524e-01
7.2218154e-02	-3.2428550e-02	-2.0132040e-01	-1.0364446e+00	-9.4778863e-01	-1.2700152e+00	-1.3171983e-01	4.5165448e-01	5.6133928e-01
1.1157545e+00	-1.5311057e+00	-9.6671415e-02	6.0632584e-01	1.5327990e+00	-1.1645041e+00	1.0076712e+00	8.6903258e-01	1.1400137e+00
3.1892867e-01	-5.0790790e-01	-5.5307236e-01	-8.0813149e-01	6.9264385e-01	3.0158112e-01	-3.9637554e-01	5.6624547e-01	1.1121948e+00
6.7712418e-01	-7.0076249e-01	4.8554436e-01	-1.1609870e+00	-1.4772483e+00	1.2849384e+00	1.4342832e+00	1.0033912e+00	6.5487106e-01
-1.5640903e+00	1.1568562e-01	-1.3136701e+00	-2.7686392e-01	-1.0471603e-01	6.5150316e-01	5.5733830e-01	-7.3031357e-02	1.0768147e+00
1.1809388e+00	-3.1766621e-01	2.5984802e-01	-5.5322813e-01	-6.7037191e-01	1.3632518e+00	-1.0444591e+00	9.2471415e-01	6.0018004e-01
-5.4344233e-01	-1.4501276e+00	4.5193733e-01	1.0091097e+00	-1.1893696e+00	5.3735183e-01	9.9527806e-01	2.1181306e-01	2.0315809e-01
-1.0253375e+00	1.8068145e-01	-6.6025438e-01	-1.3518206e+00	2.1929842e-01	-8.0669892e-01	-1.3424655e+00	5.1766809e-01	4.2800666e-01
-1.2112907e+00	-1.2069807e+00	-7.9009976e-01	-5.1490107e-02	6.6040332e-01	9.2509037e-01	1.0049762e-01	1.3775325e+00	1.3042058e+00
-6.4271280e-01	-4.6093623e-01	3.0544170e-01	-1.4562569e+00	1.5168730e-01	2.5175907e-01	-1.1134166e+00	-1.3494255e+00	8.0872043e-01
-1.2785469e+00	2.1220311e-01	1.9622555e-01	8.3931447e-01	-1.5647954e+00	-4.1062678e-01	1.2746942e+00	-6.3659799e-01	1.1150369e-01
-4.4781369e-02	7.9001292e-01	-7.0948213e-01	6.0727742e-01	-1.2435005e+00	6.7480288e-01	1.2658474e+00	9.6210520e-01	4.9782285e-01
1.3417761e+00	1.3765526e+00	1.2195046e+00	-5.2296456e-01	1.5031454e+00	2.6245310e-01	2.3256597e-01	3.2467481e-01	7.4926284e-01
8.7912476e-01	1.0313350e+00	4.6255148e-01	7.1085794e-01	-1.3234710e+00	2.5314039e-01	5.9492791e-01	-1.3699040e-01	2.3699584e-01
5.3956553e-01	1.4812245e+00	-1.3390748e+00	-8.7437603e-02	-1.1007921e+00	8.1415874e-01	-7.3600984e-01	3.8973729e-01	3.9999835e-01
-1.3000922e+00	9.5940514e-01	5.4016616e-01	7.0155996e-01	-1.7426948e-01	-1.2115750e+00	1.4744489e+00	9.4013799e-02	4.9190113e-01
-8.7210826e-01	-1.0729056e+00	-6.3017542e-01	7.2107615e-01	-9.8283249e-01	8.6235570e-01	1.8040868e-01	-1.3118229e-01	5.9734099e-01
1.1477541e+00	4.1815715e-01	-1.0495241e+00	-1.1376403e+00	2.8514607e-02	1.4452666e+00	4.9183544e-01	6.1721298e-01	8.5632504e-01
9.2385271e-01	2.2450706e-01	6.9131939e-01	-5.8794426e-01	-1.4186684e+00	-1.9896485e-01	7.4790885e-01	-4.0315169e-02	4.1200280e-01
1.4416396e+00	2.3731244e-01	1.3952904e+00	-1.2702965e+00	1.1292495e+00	-1.3477008e+00	5.9189842e-01	1.0069701e+00	5.7789745e-01
-1.4676134e+00	-1.3124386e+00	-1.3430827e+00	3.9109121e-01	9.3579487e-01	7.6296979e-02	-1.3872601e+00	3.8713881e-01	1.2284387e+00
-1.5352221e+00	-1.0339874e+00	-8.4779613e-01	8.5818151e-01	1.0916202e+00	5.5352458e-01	1.2203614e+00	4.0365013e-01	8.5966451e-01
-5.7732482e-01	1.0635458e+00	1.3547312e+00	4.0484942e-01	-3.9928169e-02	8.3178378e-01	-8.4472492e-01	1.4491289e+00	6.4853316e-01
1.2815063e+00	-6.4715219e-01	-1.2956633e+00	-3.8542969e-01	1.2280997e+00	-2.9726960e-01	-4.3460368e-01	-1.2584680e+00	1.2293144e+00
-4.8300146e-01	-4.9305640e-01	1.3071376e+00	4.7316721e-02	4.0748186e-01	-1.0778615e+00	-1.8116342e-01	1.2713735e+00	6.9723909e-01
6.9816081e-02	7.2258611e-01	-9.4968144e-02	4.2919059e-01	-1.2434644e-01	-1.1952988e+00	-6.1032945e-01	-1.1383477e+00	8.7304503e-01
-1.5567822e+00	-8.9246472e-01	-2.0052833e-01	3.0945714e-01	-7.3145361e-01	1.0984996e+00	-5.0712625e-01	9.0287429e-02	7.4732362e-01
1.4871343e+00	1.4503100e+00	6.4928958e-01	-1.4311984e+00	-4.8882489e-01	-6.5655815e-01	-1.3003492e-01	7.1573500e-02	4.0956186e-01
-2.4432338e-01	-2.5700447e-01	-1.2828331e+00	1.0235810e+00	-4.1518661e-01	-1.4994270e+00	1.0515467e+00	-2.9416515e-01	6.2161630e-01
-2.8142479e-01	2.1583970e-01	1.7391942e-01	-3.5664219e-02	-5.6414814e-01	9.8732928e-01	-1.2548805e+00	8.3309262e-01	8.6126301e-01
1.3321041e+00	-9.2163869e-01	1.3825314e+00	6.3567247e-01	-3.1120703e-01	1.5077450e-01	-1.2655988e+00	-2.9078302e-01	4.2946711e-01
-1.4576831e+00	1.2118707e+00	9.8519950e-01	-8.0942213e-01	2.9525495e-01	-1.1982523e+00	8.0518454e-01	1.1279913e+00	7.0752936e-01
-1.1405213e+00	9.6526068e-01	-1.0869027e+00	-8.6155886e-01	-1.3664153e+00	-1.4169611e+00	-1.2445195e+00	-1.3610487e+00	9.2653784e-01
1.2560686e+00	-4.8286174e-02	7.8690847e-01	-6.1924945e-01	-2.9920282e-01	1.5483021e+00	8.4653107e-02	-1.2092240e+00	3.2386087e-01
-7.5793752e-01	-1.0148139e+00	-5.3442612e-01	3.7096116e-01	9.8805523e-01	5.0174820e-01	-3.7669997e-01	-4.6523839e-01	1.3404791e+00
5.0236053e-01	-2.7049469e-01	-2.8641887e-01	-1.3171999e+00	-2.1453508e-01	8.4724280e-01	-8.8721890e-01	1.6243556e-01	8.4474212e-01
-1.4276612e+00	-3.1971642e-01	-9.2207137e-01	6.2445763e-01	8.5728937e-01	-1.2297909e+00	-1.4893161e+00	1.0470871e-02	7.7001571e-01
7.8222734e-01	-1.3503806e+00	2.2300379e-01	-8.0167408e-01	1.1184909e+00	-5.5759894e-01	1.2748500e+00	5.4732494e-02	9.5747310e-01
-6.7036373e-01	-9.8207749e-01	1.0474652e-01	5.5454663e-01	-8.1350001e-01	-1.9456273e-01	7.4193787e-01	-5.9761658e-01	5.0142254e-01
-1.0520005e+00	1.5150809e-01	1.1828443e+00	-8.4024884e-01	-2.8347018e-01	3.8211455e-01	7.6856774e-01	-4.7018325e-01	4.7026520e-01
-8.9764062e-02	-1.4350934e+00	6.5050973e-02	-6.0319978e-01	1.5127186e+00	7.8378290e-01	-9.1106523e-01	-1.2644276e+00	1.0171352e+00
-7.0011018e-01	1.5337555e+00	3.7465551e-02	-5.9131843e-02	-6.4819666e-01	3.4119689e-01	-1.5074612e-01	-1.5022855e+00	6.5946995e-01
-1.4873223e+00	1.0609403e+00	1.3649805e+00	-1.0856059e+00	8.0200429e-01	1.0894752e+00	-1.4662983e+00	6.8122877e-02	7.6958757e-01
2.2765736e-01	-4.5595271e-01	1.3170996e+00	5.9241876e-01	-1.2879930e+00	-1.5335342e+00	-1.4225185e+00	1.4014760e+00	5.1167418e-01
-2.2256451e-01	-8.5275873e-01	8.3066999e-01	1.0749002e+00	1.4163809e+00	-4.8388138e-01	-7.4888859e-01	-1.0546143e+00	7.1883711e-01
9.9505810e-01	-3.7032628e-01	-1.6727643e-01	-1.4508925e+00	1.2657760e+00	9.8905628e-01	-1.3504194e+00	-3.6941709e-02	8.8820113e-01
1.2437542e+00	-5.7881438e-01	3.1047621e-01	-1.0761222e-01	-9.6761216e-01	9.0222230e-01	1.5087640e+00	1.1560418e+00	4.6986743e-01
-3.8130644e-01	1.3791263e+00	-1.1747201e-02	9.1886771e-01	1.3675944e+00	-8.1750205e-01	-1.1385517e+00	-1.1563182e+00	9.9317367e-01
2.3165452e-01	3.0568220e-01	4.8513452e-01	-6.5992271e-01	1.2664655e+00	1.5693206e+00	-1.9750235e-01	-3.4758227e-01	5.8802286e-01
9.8414046e-01	1.0966808e+00	1.2229366e+00	-1.4989343e+00	1.1951941e+00	-1.2402120e+00	1.2414566e+00	1.5471869e+00	4.9442289e-01
-3.6608272e-02	1.8970321e-01	-1.5447578e+00	-1.5726949e-01	2.8357921e-01	2.2490179e-01	-1.2967388e+00	6.0803924e-01	9.7318576e-01
4.7693325e-01	-3.7470426e-01	-6.2318976e-01	-1.1489036e+00	3.1979481e-01	5.8838569e-01	-1.0616032e+00	-2.8532066e-01	1.0085440e+00
-1.5273393e+00	1.2388003e+00	1.1961892e-01	-1.3944772e+00	-4.7370346e-01	-7.3537289e-01	-1.2607176e+00	-1.3139681e+00	4.4983309e-01
-3.7611922e-02	1.1828752e+00	-1.8407238e-01	-6.9760720e-01	-7.3832886e-01	-3.8662686e-01	1.1613215e+00	1.5348043e+00	6.9524526e-01
-6.8344194e-01	5.8539124e-01	7.6421417e-01	-2.6049629e-01	1.9780503e-01	-1.2240166e+00	-3.8395169e-01	-1.6112078e-01	8.0435469e-01
-9.4593572e-01	-7.9753687e-01	1.3167634e+00	1.2189806e+00	7.0410484e-01	-8.9899878e-01	-2.4469023e-01	9.5962941e-02	5.5645010e-01
1.2587816e+00	9.7364362e-01	1.4639970e+00	1.0805648e+00	-4.8943754e-01	-1.5534979e+00	-1.6393854e-01	1.2121260e+00	5.6899176e-01
8.5748600e-01	-5.2782617e-01	4.4451154e-01	-4.9432649e-01	-1.2871369e+00	1.3689922e-01	-1.3834063e-01	-1.0269799e+00	5.4958645e-01
1.2817708e+00	6.8315762e-01	1.9808086e-01	1.3672686e+00	9.7056707e-02	1.2194049e+00	-3.1237217e-01	-5.4073410e-01	3.2106615e-01
8.2093077e-01	-6.9110477e-01	-9.4327474e-01	-1.0663946e+00	7.4548399e-01	-1.2115462e+00	-4.3769109e-01	5.0956275e-01	4.2240151e-01
-4.9151423e-01	-9.2978390e-01	-1.1420549e+00	-1.0756541e-01	6.7790943e-01	1.3472411e+00	1.3358921e+00	2.3961560e-01	5.6865364e-01
1.5090503e+00	-5.9607374e-01	6.1501345e-01	-1.4361538e+00	-9.3282893e-01	-1.5181350e+00	-6.2359398e-01	-3.0241901e-01	3.1834045e-01
5.3131279e-01	3.2754193e-01	6.9120573e-01	-5.8018756e-01	-1.5084899e+00	7.2013638e-01	-3.9085356e-01	3.4054640e-01	4.0712945e-01
1.3677143e+00	9.2686287e-01	-5.1499248e-01	2.9134105e-01	-5.3722618e-01	-1.2243880e+00	-5.5239297e-03	-4.1854759e-01	7.4940826e-01
1.4156941e-01	-1.3736481e+00	-3.9090365e-01	-1.1739820e+00	-2.2309361e-01	-8.5773306e-01	1.4070938e+00	-5.0344127e-01	1.1188766e+00
1.1715036e+00	6.6072284e-01	-8.4749020e-01	1.2283146e+00	1.5273111e+00	8.4919110e-01	-8.8439821e-01	-1.0284136e+00	9.6083044e-01
1.0995673e+00	-7.6122153e-01	2.1323461e-01	8.7793042e-01	-4.3672558e-01	9.9404287e-02	-1.2058380e+00	4.9548017e-01	9.1451159e-01
-1.5616402e+00	-1.2849647e+00	-7.2308763e-01	-6.8404395e-01	-1.2863645e+00	-6.3944760e-01	-1.0481461e-01	-8.2696381e-01	6.1308309e-01
1.5191565e+00	-1.0937789e+00	-1.2533313e+00	1.5024315e+00	5.1278616e-01	1.9265982e-01	8.1440795e-01	-3.7478361e-01	9.9157976e-01
7.3941664e-01	1.4587369e+00	-3.6015679e-01	-7.5607868e-01	1.0083642e+00	-9.4836693e-01	-1.6475180e-01	-9.4886626e-02	9.4148790e-01
-7.6505811e-01	1.3193319e-03	6.9384425e-01	3.2794616e-01	-1.3147265e+00	1.2382068e+00	-1.2403990e+00	1.1695478e+00	7.3325504e-01
2.0712679e-01	1.8286332e-01	-1.5167539e-01	1.4376304e+00	1.3552109e+00	6.3235423e-01	2.2328318e-01	-3.5549007e-01	6.7215736e-01
2.9533083e-01	9.0624901e-01	-1.3766324e+00	2.6506858e-01	4.8365953e-01	-3.0447510e-02	-1.4828614e+00	5.8757272e-01	9.2800682e-01
-9.1098468e-02	8.8598860e-01	7.6953869e-01	2.2915890e-01	1.5655688e+00	3.4830329e-01	-1.9748225e-01	1.3089805e+00	8.3979281e-01
-1.1363330e+00	-3.3882046e-01	-3.0014164e-01	-1.1891321e-01	-1.4658892e+00	1.1463600e+00	-1.5622578e+00	-5.3770332e-01	6.5567727e-01
-6.0643834e-01	1.1519483e+00	9.1733841e-01	-5.2142658e-01	-8.3085891e-01	-5.1491577e-01	5.6397830e-01	1.1823023e+00	5.9933649e-01
-1.0825799e+00	-8.3971506e-01	-1.2300190e+00	1.4269288e+00	1.3371896e-01	8.9840330e-01	5.9821831e-01	3.8069013e-01	8.9282018e-01
1.1835040e+00	-1.0567981e+00	-1.2497017e+00	-5.2564264e-01	1.1758577e+00	9.7003001e-01	1.1586634e+00	-1.1652205e+00	5.6645382e-01
-1.4135208e+00	9.5967907e-01	9.5210961e-01	-3.1734795e-01	-1.1195328e+00	1.5700422e+00	-1.0774512e+00	8.2783893e-01	6.1974158e-01
-3.1964658e-01	3.8941783e-01	-1.1668392e+00	7.5733738e-01	-9.9010259e-01	1.4622602e+00	-5.8143685e-01	-6.2495529e-01	6.5114756e-01
-1.7665841e-01	1.0080045e+00	-1.2452768e+00	-1.1640405e+00	3.6198137e-01	-4.7297406e-01	1.2856299e+00	-1.2793837e+00	8.3812569e-01
-2.9283534e-01	-1.0780903e+00	-7.7237432e-02	-1.3318125e+00	-1.4441661e+00	-1.0456125e+00	-2.9293484e-01	-1.5409981e+00	4.3827930e-01
1.1922097e+00	1.2423155e+00	-6.5175454e-01	7.5649281e-02	-1.5482160e-01	4.6006280e-01	-4.8011761e-01	-2.6601979e-01	8.6918643e-01
3.9126405e-01	5.7148324e-01	6.9495641e-01	-9.0756115e-01	-8.4786191e-01	8.1600785e-01	1.4148001e+00	-5.0822819e-01	6.5899645e-01
6.2147577e-01	1.0700049e+00	-3.0915712e-01	-9.4784570e-01	2.4923866e-01	-1.5496422e+00	-1.6893140e-01	1.9916426e-01	6.2381107e-01
-6.5224007e-01	1.0958946e+00	1.9049216e-01	5.7367439e-01	1.2112318e+00	-1.0334925e+00	7.6972988e-01	1.5575981e+00	9.0160426e-01
-1.1821500e+00	-4.5707277e-01	3.1876293e-01	1.9759897e-01	-3.4689999e-01	-4.2721377e-02	-2.2842473e-01	-3.4049928e-01	9.3224179e-01
-9.6274858e-01	-8.2794988e-01	1.0331273e+00	3.8253216e-01	4.4779997e-01	1.4065425e+00	-1.0828970e-01	1.2103804e+00	3.2947853e-01
1.4283154e+00	-1.2397182e+00	1.8838463e-01	1.5194993e+00	-1.0818347e+00	-7.2478983e-01	-1.0429131e+00	1.0515460e+00	9.1520114e-01
7.8706694e-01	-9.0187121e-01	-5.4496661e-01	2.1818293e-01	1.1427217e+00	1.5536415e+00	-1.2944974e+00	-1.2668299e+00	7.9673162e-01
-1.0126526e+00	4.3506344e-01	-1.5111978e+00	7.6187526e-01	1.1675016e+00	-8.6618621e-01	-1.0891170e+00	-1.0374093e+00	1.1049122e+00
1.4974561e+00	-1.5163783e+00	1.0751459e+00	-2.9414435e-01	-1.8861985e-01	1.4866536e-01	1.2712290e+00	1.0088161e-01	6.0239440e-01
4.4551459e-01	-1.1710099e+00	-4.6376714e-01	1.1827235e+00	-2.6680236e-01	1.0524911e+00	-4.2565706e-01	-9.4281387e-01	4.3443470e-01
1.3484490e+00	9.1380168e-01	-2.4294327e-01	1.1774321e+00	-1.0944949e+00	-1.0904371e+00	-6.1178721e-01	3.2065777e-01	1.0629879e+00
-6.6601605e-02	-9.8158422e-01	9.2297789e-01	2.0964605e-01	-1.1510167e+00	1.0757893e+00	1.2509468e-01	1.4637564e+00	4.9264091e-01
-9.6619168e-01	-9.8293613e-01	-6.9510001e-01	-1.3457304e+00	7.9029850e-01	9.2508120e-01	7.4073100e-01	-4.5896792e-01	1.0322213e+00
1.0891452e-01	1.4281734e+00	1.0371902e+00	-1.3659392e+00	-1.0682993e-01	9.7769034e-02	-6.6570543e-01	-1.2639143e+00	7.4189134e-01
-1.0221141e+00	1.5417280e+00	-6.4255948e-01	1.4185535e+00	1.5004137e+00	1.5119322e-01	-1.2996734e+00	8.4114296e-01	9.8220079e-01
-4.4278796e-01	-3.3961430e-02	1.2983950e+00	8.2144527e-02	-1.1165002e-01	-4.4402165e-01	-1.1765636e-01	-7.7224330e-02	6.8244345e-01
4.9578357e-01	9.8010270e-01	6.2280616e-01	1.4438975e+00	-9.7109275e-01	-1.3893217e+00	-1.3886484e+00	-4.3155101e-01	9.8970061e-01
1.1308175e+00	1.2158107e+00	-2.8365685e-01	-1.2179550e+00	-5.8202725e-01	1.1289916e+00	-1.2236925e-01	8.5967203e-01	7.3901935e-01
-9.8512248e-01	1.2120789e+00	1.5169517e+00	4.4847181e-01	7.8747976e-01	-2.5833064e-01	1.0832171e+00	3.2313734e-01	2.7137363e-01
-7.6021963e-01	1.3225832e+00	1.3834560e+00	7.8501466e-01	-3.5745944e-01	-8.1956787e-02	1.0045511e-01	-8.4440656e-01	2.2909359e-01
-1.5397129e-01	-1.2531514e+00	8.1860004e-01	-9.4772113e-01	-1.0956545e+00	-1.4301328e+00	1.3137685e+00	-1.3670840e+00	6.6277970e-01
8.7686891e-01	-4.7766348e-01	1.1766381e+00	-4.7428813e-01	1.3512091e+00	8.3732512e-02	1.3941618e+00	1.0283293e+00	3.9960611e-01
3.2457511e-01	-1.3208124e+00	-5.6992574e-01	-1.1400969e+00	-8.0251148e-01	-1.4118241e-01	-1.4618143e+00	1.2300828e+00	7.1827806e-01
1.3289556e+00	-3.9986732e-01	-2.5841562e-02	-1.0349851e+00	-9.5317699e-01	-9.5032485e-01	-1.4583434e+00	-8.2015670e-01	4.9394927e-01
-9.6680161e-01	-7.0330804e-01	-7.7934777e-01	3.3145854e-03	-1.0647539e+00	-2.5274797e-01	3.2836300e-01	9.3487977e-01	8.5179916e-01
-7.1750015e-01	1.3149138e+00	-1.1982610e+00	-8.4043049e-01	-8.0708583e-01	-5.0193337e-01	-9.8142462e-01	1.4193892e+00	8.6344181e-01
1.5491277e+00	-1.3489208e+00	-1.5631078e+00	-5.1463230e-01	7.0548522e-01	-8.1795522e-01	-1.4421074e+00	1.5613223e+00	6.7640608e-01
-1.3305646e+00	1.5630195e+00	-1.1553925e+00	-6.2050783e-01	7.1944002e-01	2.3610911e-01	-1.1242962e-01	-5.7900496e-01	1.1540587e+00
-9.4354645e-01	-3.2842432e-01	-4.9738862e-01	1.2125877e+00	-3.6162892e-01	4.5425911e-01	-1.5073736e+00	1.3176869e+00	1.0998737e+00
5.7456246e-01	-4.9175148e-02	1.6745193e-01	4.4937869e-01	1.0844953e+00	6.6266276e-01	-6.2428999e-01	1.2772606e+00	8.4161362e-01
-5.8461640e-01	-2.4784261e-01	-5.0238396e-01	3.1891774e-01	-4.0801397e-01	4.2701487e-01	4.7765897e-01	4.1642232e-01	6.7155348e-01
1.2539091e+00	2.6107367e-01	1.0339208e+00	4.9335897e-01	6.0599880e-01	1.4413325e+00	1.2450590e+00	-6.5848261e-01	3.0477095e-01
6.4629093e-01	-9.3970627e-01	9.5777729e-01	1.2211559e+00	-2.1527442e-02	-3.4625379e-01	-4.4184474e-01	7.1369374e-01	6.6106472e-01
-1.4158084e+00	-8.5704436e-01	-1.5785318e-01	-5.7408147e-02	-5.2855475e-01	-1.2578351e+00	6.4048347e-01	4.4987941e-01	1.0976437e+00
-1.0696559e+00	-1.4230692e-01	-1.5341982e+00	-3.8977445e-01	1.0042839e+00	-6.5817780e-01	1.5092007e+00	-6.9027897e-01	1.0776854e+00
-1.5131488e+00	-1.0004334e+00	9.2373150e-01	-7.1850572e-01	-7.7814108e-01	-4.4651380e-01	-8.3200854e-02	3.8308565e-01	7.9751522e-01
-2.9897022e-01	-4.8012553e-01	-5.9551360e-01	3.5649403e-01	2.3316008e-01	7.0748913e-01	-3.4801824e-01	1.3972390e+00	1.0795198e+00
-1.3857797e+00	1.2817093e+00	3.1712907e-01	5.7791662e-01	1.1553576e+00	-1.5832177e-01	5.0290034e-01	-9.4863969e-03	7.1686683e-01
9.6914470e-01	-2.1306204e-01	-1.2944666e+00	-7.5985075e-01	-8.9607721e-02	1.5008610e-02	1.3617556e+00	7.8335284e-01	8.6713013e-01
-7.4296351e-01	4.8193159e-01	-5.7113709e-01	-2.3747794e-01	-1.2140865e+00	9.2229289e-01	5.2359156e-01	-6.0370797e-01	6.3932965e-01
8.4305398e-01	7.9836052e-01	-1.5355239e+00	-1.4690202e+00	-5.0751897e-01	3.5840709e-01	4.0239176e-01	8.2449770e-01	6.7061090e-01
6.2529067e-01	3.0308265e-01	6.3407340e-01	-4.6159601e-02	-4.4722692e-01	1.3148784e+00	-8.5068973e-01	-2.3229577e-01	5.7841624e-01
6.3282866e-01	1.3884422e+00	5.8933549e-01	1.6896807e-01	1.2883798e+00	1.1981273e+00	-1.5405317e-01	8.0469795e-01	8.9571577e-01
-1.4814282e+00	-2.0281776e-01	-4.8000572e-01	-1.5340093e-01	-1.1981034e+00	-6.8402060e-01	-4.9930486e-01	2.1164146e-03	8.7439304e-01
-1.2415890e+00	-1.3002773e-01	1.5381356e-01	1.0381243e+00	1.0844242e+00	-1.2466993e+00	-6.2274125e-01	1.0130603e+00	7.9551682e-01
-9.2828562e-01	1.1724423e+00	-3.8632425e-01	-6.5005475e-01	1.5384901e+00	1.1482742e+00	1.3745446e+00	-9.2790040e-01	6.1478610e-01
-5.4732580e-01	1.1682434e+00	7.2034006e-01	9.8905651e-01	-1.0456322e+00	2.4046185e-01	-1.3014877e+00	-3.5606977e-01	7.2912889e-01
-3.2148909e-01	-2.8740348e-01	-9.4269589e-01	9.0600874e-01	1.2835602e-01	1.3540821e+00	8.0603030e-01	2.6932762e-01	6.0453316e-01
2.7222359e-01	1.3791493e+00	-8.3811955e-01	-1.0680191e-02	-9.9449149e-01	3.6133820e-01	4.0364657e-01	-4.4573399e-01	5.1738615e-01
1.1029064e+00	6.9229234e-01	6.2616697e-01	-4.3118395e-01	-1.1456388e+00	3.1251217e-01	1.3893818e+00	1.2473843e+00	4.7974888e-01
1.1508300e+00	-1.1018662e+00	-3.4711750e-01	7.4565258e-01	6.9427123e-02	-3.5087580e-01	-1.1752070e-01	9.3968843e-01	1.0596886e+00
-7.8653250e-01	6.2351378e-01	-6.6217222e-02	3.6990062e-01	1.3307832e+00	-4.0012764e-01	8.9145151e-01	5.5725185e-01	9.6450760e-01
5.7014312e-01	-9.5692191e-01	-7.8904874e-01	-2.9215657e-01	1.4744551e+00	1.2045982e+00	3.7018051e-01	6.4417374e-01	1.0035037e+00
5.3779343e-01	-1.1738138e+00	-8.7951722e-01	3.3911723e-02	2.8392107e-01	1.2587977e+00	1.2703107e+00	6.9980332e-01	4.3542756e-01
3.3207651e-01	9.1347052e-01	-8.5243017e-01	1.3260639e+00	-2.1788778e-01	1.1282901e+00	-1.5092282e-01	-5.2850963e-01	6.1191260e-01
-1.4003025e+00	-2.6426708e-01	-1.1313842e+00	6.9752751e-01	1.0570618e+00	5.1898773e-01	-1.2945029e+00	-1.3788654e+00	1.2569511e+00
-1.2129506e+00	6.7526701e-01	8.8658917e-01	-1.0789933e+00	3.3132026e-01	1.5655468e+00	-1.1814913e+00	9.3764243e-01	7.9382667e-01
-2.6572812e-01	-1.3615481e+00	3.3023572e-01	-1.3671389e+00	-1.5441214e+00	1.3072141e+00	6.8227447e-01	7.2756429e-01	9.7057124e-01
1.2522895e+00	-1.7880851e-01	-9.2243208e-01	1.0586437e-01	6.4913954e-01	1.1897164e+00	1.7377299e-01	1.0944717e+00	1.0505653e+00
-1.4405937e+00	1.2695876e+00	4.4370738e-01	1.1209578e+00	-6.6303323e-01	-6.7355643e-01	-1.0784571e+00	7.6167735e-01	9.2896577e-01
1.9640241e-01	2.6090587e-01	-7.5109388e-01	-1.9334021e-01	-3.7033293e-01	-1.3045150e+00	1.3612770e+00	-4.7888891e-01	7.9202232e-01
-8.7864666e-01	-6.1844493e-01	-7.1560017e-01	-1.0620720e+00	-6.9051432e-01	1.9180847e-01	-1.2374138e+00	7.4543910e-02	8.5558129e-01
1.2126621e+00	1.3261598e+00	-1.0754363e+00	2.8460437e-01	-4.3096993e-01	4.5086585e-01	1.3030152e-01	-6.3596992e-01	6.6539653e-01
-1.4405747e+00	-8.3249292e-01	-1.2748679e+00	-1.2998915e+00	1.2011029e+00	1.8082706e-01	2.8764367e-01	-1.0482399e+00	1.3683618e+00
5.1571721e-01	9.4520978e-01	-1.0432794e+00	-6.4155764e-01	-9.3765544e-01	1.2402880e+00	-4.8395578e-01	2.8397773e-01	4.6353604e-01
4.9407739e-03	-8.9325074e-01	-1.1679631e+00	-7.1318770e-01	-9.4616966e-01	1.0539556e+00	-2.6147656e-01	7.3440155e-01	7.7549489e-01
1.3581787e+00	8.0611570e-01	-1.2843703e+00	-1.3697014e+00	4.6855108e-01	1.5321098e+00	4.5158361e-01	-2.3076319e-01	6.8042396e-01
9.6491264e-02	-1.3025416e+00	-5.2789084e-01	1.0193885e+00	-1.0347434e+00	-1.4649253e+00	-3.2204826e-01	1.4300418e+00	1.0481982e+00
6.6686637e-01	-1.1990649e+00	-4.0377157e-01	-1.3840123e+00	9.2398054e-01	-3.3810170e-01	2.9898698e-01	1.5291716e+00	7.2307453e-01
-1.1795878e+00	6.3240809e-01	-3.4867257e-01	-7.4226873e-01	4.4850666e-01	6.6581695e-01	-1.4741413e+00	-5.8276624e-01	1.2056888e+00
1.2590010e+00	8.7480638e-01	-1.0695165e+00	-4.6038093e-02	1.3707079e+00	3.2417101e-02	-1.2930399e+00	9.3366764e-01	7.8943000e-01
1.4036388e+00	2.1724816e-01	8.2900942e-01	-9.3043101e-01	1.8844012e-01	1.3386858e+00	1.4170584e+00	-1.0320141e-01	4.2752289e-01
7.3730904e-01	7.5916682e-01	1.9790637e-01	1.0942681e+00	3.8770208e-01	-7.9500485e-01	8.6578838e-02	-3.4698422e-01	9.1052620e-01
1.5116248e+00	1.3089583e+00	-7.3425426e-01	4.8035402e-01	4.4575566e-01	-4.5299212e-01	5.7313832e-01	-9.6788552e-01	8.6680050e-01
-1.8148091e-01	-9.1069212e-01	-4.3540830e-01	-5.8311549e-01	-8.8305019e-01	-1.3595440e+00	6.1261985e-01	-8.5213762e-02	7.7199006e-01
3.3682943e-01	-1.6307263e-01	-1.1379602e+00	1.3471108e+00	-5.4087988e-01	-1.0533248e+00	1.3027449e+00	3.7855646e-01	5.3117149e-01
-5.7671102e-02	-1.2929547e+00	3.1881775e-01	-5.6721844e-01	1.2009854e+00	-3.5500701e-01	1.4746840e+00	6.7334198e-01	9.2898099e-01
1.4739239e+00	-2.9343255e-01	-1.1871068e+00	1.4934458e+00	2.2810467e-01	-7.1841685e-01	9.8994021e-01	8.4183599e-01	9.1115691e-01
7.8064542e-01	5.7967968e-01	5.5134881e-01	-9.8247576e-01	1.0121258e+00	-1.2914469e+00	5.0375791e-02	-9.9574735e-01	7.8115065e-01
1.0167042e+00	5.9757476e-01	-1.1788187e+00	-2.5911551e-01	-9.2534717e-01	-8.4670689e-02	-1.5640957e+00	-2.6169765e-01	7.3452946e-01
6.2421476e-01	-2.3269287e-01	-1.5225277e+00	-7.0689927e-01	-1.4261902e+00	8.1210230e-02	1.0910970e+00	-1.2267238e-01	7.4703668e-01
1.3996074e+00	4.1384251e-01	-8.5163200e-01	6.4735001e-01	3.7357841e-01	1.4491307e+00	5.9042797e-01	-8.6989266e-01	4.8614090e-01
-1.0444429e+00	-3.5039030e-02	-2.8284510e-01	6.7620278e-01	-1.3114554e+00	-1.2274143e+00	-9.6830909e-01	6.8622593e-01	1.1660040e+00
1.2684672e+00	-1.4231587e+00	-5.4798121e-01	-1.3421450e+00	-2.1692423e-01	-1.4548176e+00	-9.2095116e-01	6.1254395e-01	5.9512895e-01
2.7974002e-01	1.0583411e+00	1.2293938e+00	-7.9495426e-01	1.5435738e+00	-1.0312397e-01	2.0085036e-01	2.6985545e-02	7.8680384e-01
-1.3737421e+00	-1.5885589e-01	1.6637469e-01	3.9738300e-01	-4.2651400e-01	9.5459178e-01	-1.5200313e+00	1.1567128e+00	9.0623346e-01
-9.1984485e-01	4.6280431e-01	2.4202036e-01	-2.0990736e-01	6.9357139e-01	-2.8964415e-01	2.6614945e-01	6.9666395e-01	9.7043706e-01
-5.4906663e-02	-2.3134890e-01	-7.2628362e-01	9.5472203e-02	1.5455672e+00	1.4194239e+00	-4.5419524e-01	1.1510796e-01	9.7993950e-01
8.1194791e-01	1.0106939e+00	-1.5613638e+00	-7.5253565e-01	-1.4822876e+00	-9.9735546e-01	4.1081720e-01	-6.0166126e-01	2.7905466e-01
-6.6991697e-01	1.4081439e-01	-1.1730636e-01	1.8533496e-01	2.2217101e-02	9.8513527e-01	-6.1604346e-01	6.6603632e-01	9.5797501e-01
1.7354334e-01	1.0481167e+00	1.3521635e+00	-1.5351769e+00	-4.4671568e-01	9.7518608e-01	8.4690006e-01	5.7785682e-01	6.1824053e-01
1.3448720e+00	7.8736728e-01	-4.6900599e-01	1.8266752e-01	4.5608851e-01	2.6355550e-01	-7.0693443e-01	1.3766883e+00	6.7294274e-01
-4.9606228e-01	8.9369223e-01	-3.2762857e-01	7.5695929e-01	-6.5457121e-03	-6.8436739e-02	5.6444287e-02	1.7040783e-01	7.2838423e-01
4.6812513e-01	3.3088945e-01	7.5849988e-01	-1.2353845e+00	-5.8040551e-02	-3.9336528e-01	-1.0185174e-01	-1.0881190e+00	6.5359542e-01
1.2310838e+00	6.3992858e-01	-4.7542533e-01	-3.2106793e-01	1.5477677e+00	-1.3793571e+00	3.4580666e-01	-8.0467401e-01	1.0698007e+00
2.9539590e-01	-1.5335387e+00	-1.4034508e+00	1.0674166e+00	9.4516736e-01	-1.0432960e+00	2.6193610e-02	4.0030334e-01	1.3147557e+00
1.0025676e+00	-5.5916758e-01	-7.1961036e-01	-1.5650819e+00	1.5354342e+00	-1.4468072e+00	4.1303841e-01	-1.3932604e+00	9.6606051e-01
-1.3488479e+00	-1.4259089e+00	6.4040347e-01	2.2404784e-01	1.0003691e+00	-5.6197778e-01	-9.8313193e-01	9.0373642e-01	8.5739050e-01
-3.5405360e-01	-1.1822136e+00	1.6471990e-01	-1.1975182e+00	-5.9982087e-01	-1.5330717e+00	1.2790312e+00	-5.0249862e-01	7.8150234e-01
-4.0236831e-01	1.1092243e+00	7.0429827e-01	1.4951666e+00	1.8142903e-01	1.0063444e+00	-1.2418089e+00	-8.9332732e-01	4.4774363e-01
1.2447252e+00	5.2228762e-01	-3.8015130e-01	-3.3483539e-01	-1.2087184e+00	-7.0442492e-01	-1.4813474e+00	-4.8102758e-01	8.3765157e-01
2.3131368e-01	4.7814957e-01	7.9659578e-01	-9.8590720e-01	-1.3921907e+00	1.3930770e+00	1.1614429e-01	-1.3126239e+00	5.8827808e-01
1.5388374e+00	6.5890551e-02	-1.0826428e+00	-1.3826788e+00	3.3002739e-02	-8.4543587e-01	1.1080918e+00	-1.0062243e+00	8.8052548e-01
-1.4915060e+00	-1.5597193e+00	1.2703840e-01	-3.2173261e-01	-1.3848621e+00	1.8297123e-01	3.3702289e-01	-4.1815995e-01	5.6538113e-01
-9.7321628e-01	-7.5294907e-01	-1.1486246e+00	-6.7907810e-01	6.8287902e-01	-4.2178703e-01	5.2156059e-02	-2.7149332e-01	1.4395848e+00
1.4269004e+00	-4.7976682e-01	1.5321314e-01	1.4043089e-01	9.0980489e-01	-1.5416663e+00	8.2525228e-02	-1.3956589e+00	8.5877384e-01
-1.0038895e+00	1.0273703e+00	-1.0527496e+00	8.8582447e-01	9.5930275e-01	1.0703884e+00	1.5591543e+00	1.4325395e+00	5.4648606e-01
1.1230183e+00	8.1966831e-01	-1.1268738e-01	4.4228674e-02	3.4787365e-01	1.2579164e+00	6.8195349e-01	-4.7524028e-01	3.7232983e-01
-1.1955029e-01	2.8153840e-01	4.4351121e-01	-1.2061403e+00	2.0856089e-01	-1.1179611e+00	1.0623896e+00	-1.4348529e+00	7.9980960e-01
1.3375593e+00	5.7734286e-01	-9.0643207e-01	1.0970192e+00	-7.3458909e-01	2.9277848e-01	-1.2305339e+00	-7.0689018e-01	5.0306144e-01
-8.7796198e-01	-9.7822239e-01	-8.2100031e-01	-4.0617744e-01	2.2024399e-01	9.9389723e-01	-4.7880475e-01	8.0011068e-01	1.1841933e+00
1.5377042e-01	-1.0293086e+00	-6.7726596e-01	5.6677832e-02	8.4454118e-01	5.8267670e-01	1.4888771e+00	1.4436239e+00	9.0963881e-01
-1.1112306e+00	1.1605864e+00	-8.1883354e-01	6.8174022e-01	4.8801137e-01	7.0293857e-01	7.7205220e-01	4.6699395e-01	6.4035891e-01
3.1630666e-01	-1.7305013e-01	1.1821248e+00	6.1947878e-01	-6.9134661e-01	-1.2414387e+00	1.1035897e+00	1.0688573e+00	5.1570105e-01
5.9129895e-01	6.6131756e-01	5.4026562e-01	3.4177030e-01	1.2886841e+00	-1.5435369e+00	6.8899997e-02	6.5765152e-01	7.3430713e-01
1.1038889e+00	-1.9058816e-01	1.0415618e+00	1.3021426e+00	7.7347136e-01	1.0477604e+00	-1.2454375e+00	1.0260726e+00	5.0329092e-01
-1.1848375e+00	1.2092659e+00	5.7559486e-01	7.7641817e-01	-1.7716950e-01	1.0823490e+00	3.6386224e-01	1.0008809e+00	3.8167338e-01
9.9217326e-01	1.1694914e+00	1.0590952e+00	-9.1573895e-01	5.4198849e-01	1.2180162e+00	-1.2482963e+00	-1.4233100e+00	6.5126612e-01
-1.1780171e-01	-1.3032553e+00	-5.0565587e-02	-1.6214924e-01	-1.4181158e+00	5.8028391e-01	-5.5964694e-01	-1.4842033e+00	4.5816899e-01
-6.8992341e-01	-6.2859923e-01	1.5157859e+00	-1.4813631e+00	9.9132713e-01	1.3280008e+00	-5.7639795e-02	-7.5932136e-01	5.6833734e-01
7.5736554e-02	3.0883989e-01	6.3816720e-01	-1.4738200e-01	1.3692076e+00	-1.3070440e+00	-1.1415013e+00	-7.6481344e-01	6.8284879e-01
5.5924127e-01	7.6092033e-01	2.7887918e-01	-1.4743392e+00	1.0593386e-01	-1.4729658e+00	4.9371203e-01	1.1776803e+00	2.8716158e-01
-4.7714949e-01	-6.3573906e-01	-1.3381026e-01	-1.4783253e+00	-8.5256769e-01	-3.8677820e-01	8.7186094e-01	1.2392336e+00	6.4823342e-01
1.0345655e+00	-3.0969179e-01	4.3134218e-01	6.4241748e-01	-3.0109270e-01	-6.2592729e-01	9.7865918e-01	-9.6031070e-01	3.7765215e-01
-7.7340399e-01	6.2919057e-01	-1.2278867e+00	-5.4343894e-01	6.4080161e-01	1.2338039e+00	-1.0543515e+00	1.5610818e+00	1.0329549e+00
1.3095605e+00	2.0504607e-01	2.9601785e-02	-9.6844255e-01	5.7305689e-01	-1.1116971e+00	1.2381988e+00	-1.4793127e+00	7.6646710e-01
-2.1409820e-01	-1.1776333e-01	1.1455659e+00	-2.2380855e-02	-7.5593186e-01	-1.2417800e+00	4.9810777e-01	-2.4366219e-01	7.2283598e-01
-1.2248464e+00	-4.4925709e-02	-1.2959874e+00	8.3608374e-01	-3.4604407e-01	-9.9597021e-01	-6.4721523e-01	1.4063309e+00	1.1542768e+00
8.6370752e-01	-1.0841509e+00	-9.9808633e-01	-2.8453047e-01	-8.7472054e-01	-8.6567964e-01	-1.5525462e+00	-1.1392532e+00	8.2818681e-01
-9.6744108e-01	-8.6616323e-02	1.2678316e+00	-5.9962630e-01	1.2255817e+00	-7.6220688e-01	4.2467241e-01	5.7880794e-01	7.4508677e-01
1.1013347e+00	-1.2031378e+00	-9.7658297e-01	3.0994251e-01	-1.0718061e+00	1.0038394e+00	-2.2939611e-01	-1.4874332e+00	7.3981238e-01
-1.3123972e-01	1.2951261e+00	1.3915694e+00	4.4320339e-01	4.6692460e-02	1.1769523e+00	-7.2629443e-01	1.5040110e+00	5.6421454e-01
-3.4796007e-01	-9.1058181e-01	-1.0506817e+00	2.0327322e-01	-6.3798258e-01	1.5694326e+00	1.3985290e+00	6.5807380e-01	1.0138220e+00
1.4806129e+00	-1.4505889e+00	8.4235552e-02	1.5018412e+00	-3.1750992e-01	6.4108256e-01	-3.1916744e-01	-1.3012965e+00	3.1822336e-01
1.0557566e-01	-1.2881534e+00	-1.1113591e+00	-1.2511062e+00	1.1766281e+00	-9.8819351e-01	-1.5485664e+00	8.7836188e-01	5.9611664e-01
-5.8967237e-01	-1.2794651e+00	1.2970722e+00	-6.6240864e-01	-7.3647986e-01	1.0320658e+00	1.3390594e+00	2.8419421e-01	2.1801824e-01
1.1013834e+00	2.3142811e-01	3.8089652e-01	7.0232320e-01	-1.4200786e-01	1.1962169e+00	-7.9850454e-01	1.2313306e+00	6.5689447e-01
6.8616388e-01	3.2060811e-01	-8.3804191e-01	9.8237300e-01	8.8427461e-01	-1.3756926e+00	4.1799219e-01	1.3024615e+00	8.2922925e-01
-4.3037404e-01	6.2911709e-01	-1.2105796e+00	-1.4680415e+00	-8.7151538e-01	8.5616347e-01	5.9361521e-01	-1.4703860e-01	8.8778839e-01
-1.3501620e+00	-1.0299722e+00	-1.2568701e+00	6.9601081e-01	-1.4539885e+00	1.0450491e+00	-8.0735763e-01	1.1557071e+00	6.9921153e-01
-4.4848883e-01	-5.6732031e-01	-1.4648840e-01	-1.4373440e+00	1.2651161e+00	-5.0479918e-01	-7.2098994e-01	-4.9837929e-01	7.8403967e-01
-1.0709400e+00	-2.1876215e-01	9.7810083e-01	1.4061482e+00	5.0719771e-01	1.2819865e+00	-5.5497568e-01	-7.7463752e-01	1.9728111e-01
-1.1035451e+00	-1.0719820e+00	-1.0136963e+00	-1.0685852e+00	1.3311228e+00	1.3040172e+00	-8.7715391e-02	-5.7291386e-01	1.0743182e+00
6.8071651e-01	2.3277302e-01	-3.3715107e-01	7.7295430e-01	8.9922775e-01	8.6648900e-01	-8.2562463e-01	1.8260609e-02	9.1735190e-01
-8.7801239e-01	9.3336745e-01	9.3510051e-01	5.5731370e-01	-8.8143632e-01	-1.3428771e+00	1.4164283e-01	-9.7001764e-01	6.6592230e-01
-6.9353129e-01	1.1346773e+00	-1.1537992e+00	-1.4579677e+00	1.4507783e+00	-5.3337834e-01	-7.3617722e-01	-1.3622306e+00	1.1774014e+00
-8.7158108e-01	1.0537672e+00	1.1478596e+00	3.5903960e-01	1.3296772e+00	-1.5259861e+00	-1.3386291e+00	9.1713621e-01	3.3355979e-01
5.8331639e-01	1.5073300e+00	-4.4494902e-01	-6.2086894e-01	-1.4061926e+00	7.1399170e-01	-1.3948394e+00	-1.4868042e+00	4.8980569e-01
-1.1120607e+00	-1.0742700e-01	-1.2676677e+00	1.4265052e+00	3.2218967e-01	-8.2539652e-01	-5.0129419e-01	-4.9089329e-01	1.0665860e+00
-1.0693658e+00	8.9026857e-01	5.8994410e-01	-1.3628553e+00	-1.0639747e+00	8.3386852e-01	5.0005722e-01	-6.2125601e-01	8.3908768e-01
2.2096223e-01	-6.6194336e-01	3.2400996e-01	-1.5660175e-01	-2.7697643e-01	1.8334119e-01	7.0133014e-01	1.2041708e+00	7.1578328e-01
3.4965672e-01	-9.0252457e-01	1.2553292e+00	6.4897846e-01	6.9753015e-01	-4.8702534e-01	-1.4986864e-05	3.5928095e-01	5.1065055e-01
-1.2393754e+00	-1.1211012e+00	-6.1836361e-01	-2.2864588e-01	-1.0345641e+00	1.5554944e+00	-2.5188423e-01	2.9392066e-01	7.5399791e-01
-1.4233016e+00	9.2432372e-01	-4.4870062e-01	-6.8355378e-01	7.9673730e-01	-1.1389496e+00	1.4486806e+00	1.3408970e+00	1.0390647e+00
-1.3439084e+00	-6.6899866e-02	-1.4889931e+00	3.1603435e-01	1.2959537e+00	-6.0249547e-01	6.3232963e-01	-1.3300243e+00	1.1679408e+00
9.8306607e-01	3.0411762e-01	4.2070473e-01	-8.4385551e-01	4.3228421e-01	-7.8818541e-01	-4.4383318e-01	-1.2872151e+00	7.1831510e-01
7.5561827e-01	-6.6337390e-02	-9.4074148e-01	-1.5303313e+00	-1.1031517e+00	1.0640648e+00	-1.3633371e+00	-1.2169359e+00	5.3518142e-01
1.3588018e+00	3.3287228e-01	5.9382581e-01	-5.8543064e-02	1.0090220e+00	-1.3493277e+00	1.1706066e+00	-1.2729074e+00	7.5251621e-01
1.1445355e+00	-5.9216027e-01	-4.0941691e-01	-6.1477220e-01	3.1483121e-01	1.0062984e+00	-1.4092268e+00	4.9058019e-01	8.9633938e-01
2.3700426e-01	1.2780622e-01	-9.8203896e-01	2.2188735e-01	9.2606316e-01	-1.4774485e+00	-4.0712514e-01	-1.4994160e+00	1.0271676e+00
-2.0895391e-01	-8.1027127e-01	7.9896452e-01	1.9028592e-01	8.9344133e-01	-3.2870185e-01	-1.6345579e-01	1.1722255e+00	7.2861327e-01
4.1216001e-01	5.7499738e-01	1.0297222e+00	-5.9323296e-03	-7.4440582e-01	1.5694128e+00	-1.4494443e+00	6.6651983e-01	5.2683513e-01
-3.8542257e-02	4.4194275e-01	-4.9273085e-01	8.2630172e-01	-1.4066025e+00	3.0817100e-01	-9.0174028e-01	-7.2065822e-01	6.0118478e-01
-6.1162638e-01	1.0067895e+00	-8.9121541e-02	-1.3281179e+00	-2.8316506e-01	-1.0562136e+00	-5.0587072e-01	-1.2630480e+00	6.5523122e-01
-3.1347250e-01	4.9259774e-01	6.7396122e-01	-6.6104354e-01	3.5762520e-01	1.3585950e+00	-1.0194099e+00	-3.0641458e-01	9.0083740e-01
-8.1495085e-02	9.9354361e-01	-1.3169178e+00	-1.4872059e+00	7.3994639e-01	8.1047253e-01	1.0242022e+00	-8.3945681e-01	5.8018735e-01
4.6496245e-02	9.2257933e-01	-9.1734424e-01	-9.5787090e-01	-1.2864189e+00	-3.3392340e-01	9.8105588e-01	1.4199902e-01	5.2575361e-01
-7.9418132e-01	-1.1104690e+00	1.1320633e+00	-1.4155104e+00	-4.0186007e-01	-1.3661454e+00	1.5279745e+00	-1.0329046e+00	7.6283425e-01
8.2171800e-01	5.5023789e-01	1.1034670e+00	7.9717718e-01	3.6207917e-01	1.0949893e+00	1.2884765e+00	4.1306488e-01	3.7825413e-01
1.7306293e-01	-1.0006345e+00	1.1477195e+00	-7.3577813e-01	1.9956627e-01	3.4717848e-02	4.2704096e-01	-5.3832373e-01	5.5843738e-01
-4.4617900e-01	-7.1832280e-01	3.4334741e-01	-9.1431043e-01	-1.1106489e+00	-8.3335792e-01	-1.2617709e+00	1.7986737e-01	4.3153158e-01
5.1246755e-02	2.8929288e-01	-4.6586655e-01	-1.2856483e+00	6.6828549e-01	-1.0264509e+00	-8.3347163e-01	8.1871097e-01	2.2612403e-01
5.0783188e-01	-1.0399112e+00	-9.7016432e-01	-1.6495883e-02	6.8048345e-01	-1.0754212e+00	2.0399827e-01	-1.0050235e-01	1.2575447e+00
-5.7681634e-01	-1.1070367e+00	-6.8578166e-01	-7.8614460e-01	1.4880775e+00	-1.0214224e+00	1.1213859e+00	1.0337784e+00	1.2221563e+00
4.0264667e-01	-1.4548586e+00	5.7100489e-01	8.0636925e-01	-1.0033652e-01	-1.3840788e+00	7.1874065e-01	-1.4345881e+00	5.6279258e-01
2.9207299e-01	-7.9242792e-01	-6.8635344e-01	-1.8264504e-01	6.7942265e-01	1.2814148e+00	4.5028372e-01	6.0139399e-01	7.5635021e-01
-1.4385821e+00	-1.1247988e+00	3.8599817e-01	-3.7917598e-01	-6.3284832e-01	1.1207070e+00	-1.7815914e-01	1.1253017e+00	8.8417017e-01
-5.5271882e-01	-1.5312259e+00	8.2491587e-02	1.4807894e+00	1.1509508e+00	-1.2671602e+00	-3.8284071e-01	5.5777905e-01	1.0520974e+00
1.4424025e-01	6.1376724e-01	9.9374557e-01	-6.9194759e-02	1.2434412e+00	-3.0546275e-01	-4.2198930e-01	8.0031107e-02	8.3092074e-01
-1.0636885e+00	-1.4041944e+00	1.1752585e+00	-5.6703312e-01	6.4197462e-01	-5.5003628e-01	1.3420593e+00	4.8115505e-01	6.6967051e-01
1.3914128e+00	-6.5097071e-01	1.3765828e+00	1.4664448e+00	1.4382086e+00	1.2474127e+00	-6.4531851e-01	3.1339333e-01	5.9378828e-01
-5.4039351e-01	1.3024911e+00	1.5389883e+00	7.4324204e-01	5.5887394e-01	1.4175911e+00	-1.0902734e+00	-1.2491431e+00	1.6979257e-01
-4.9436996e-02	3.5046011e-01	1.0436377e+00	6.9652260e-01	-3.6780163e-01	-3.8526321e-01	6.8565903e-01	9.1622434e-01	4.8420694e-01
-1.5071244e+00	-3.0323193e-01	9.0627252e-01	8.8105456e-01	1.0123702e+00	-2.9626986e-01	5.0951117e-01	-1.1046974e+00	2.6659991e-01
4.2223818e-01	-7.5570936e-01	1.2810076e+00	1.5577810e+00	4.0903579e-02	1.6865675e-02	-6.2735592e-01	1.6320408e-01	4.7532086e-01
-3.0076818e-01	2.5193863e-01	5.6000273e-01	-4.0787253e-01	-5.4233245e-01	7.1805417e-01	-7.8606003e-01	3.6062609e-01	7.6578924e-01
-1.8824006e-01	-5.3432945e-01	-2.4572617e-01	-1.5852174e-01	-1.2211262e+00	1.4790560e+00	-9.1378448e-01	9.1049103e-01	6.0039438e-01
-1.6688801e-01	1.3382830e+00	1.2746380e+00	-2.0430564e-01	5.5729181e-01	-9.2781845e-01	1.2706813e+00	-7.5075459e-02	7.1697803e-01
5.5540624e-01	-1.2817752e+00	3.2059007e-01	-4.0831587e-03	1.3158240e+00	1.0213088e+00	-2.0674420e-01	1.1270146e+00	8.5723081e-01
1.0408570e+00	-8.9513513e-01	3.2598071e-01	4.8939012e-01	1.3839125e+00	-5.2583531e-01	-1.4835646e-01	1.0725990e+00	7.4945924e-01
1.2953053e+00	5.5106432e-01	-1.7982587e-01	4.9026367e-01	-9.3507444e-01	-4.1384881e-01	9.9746791e-01	7.1313576e-01	4.0023710e-01
-1.0414394e+00	3.2293052e-01	-1.2126864e-01	-5.3598030e-01	-1.5495992e+00	-7.0858316e-02	9.0474020e-01	4.9668142e-01	6.2585485e-01
1.4827034e+00	-1.1787892e+00	7.3164351e-01	-1.2748183e+00	-3.1074987e-01	-2.5210669e-01	6.6016318e-01	5.1294344e-01	6.9382590e-01
6.8259312e-01	-1.0269223e+00	5.3880665e-01	-2.0910727e-01	-1.4461259e+00	8.5136179e-01	-7.4269487e-01	5.1009917e-01	5.8784842e-01
-7.5386361e-01	4.2761071e-01	-1.4882173e+00	9.7629435e-01	1.4644921e+00	-1.1170020e+00	-9.2512284e-01	-1.6952892e-01	9.7434298e-01
-1.4245799e-01	-1.1107192e+00	8.9229644e-01	4.0647052e-02	-6.5998540e-01	7.0432396e-01	-7.9749798e-01	1.5191355e-01	7.4209443e-01
-3.9779540e-01	-5.1433733e-01	-1.1369904e+00	1.4294023e+00	5.8899574e-01	5.1601061e-02	-1.5143704e+00	-9.0372174e-01	1.1688268e+00
-4.3808168e-01	1.1954788e+00	9.1117796e-01	2.0589747e-01	9.2885834e-02	1.7946067e-01	1.1607309e+00	7.4925641e-01	5.0047996e-01
1.0543025e+00	-1.2149245e+00	-1.0961520e+00	-1.5163568e+00	-2.3934136e-01	2.6653849e-01	-8.8551943e-01	1.2490869e+00	7.3350849e-01
1.0794746e+00	1.1164168e+00	-7.2667692e-01	-8.0972469e-01	-1.3717115e+00	-1.9869268e-01	-1.2006498e+00	1.2821763e+00	8.6450441e-01
3.1939619e-02	-1.1155335e+00	1.2532758e+00	3.3656223e-01	-1.3485203e+00	8.5044145e-02	-8.7102075e-01	1.3525975e+00	6.1912373e-01
-4.0316608e-01	2.5338493e-01	-5.7320034e-01	-1.4069422e+00	-1.1306260e+00	-8.7709566e-02	5.7602612e-01	5.4125181e-01	5.1273699e-01
4.0297224e-01	-1.3591670e+00	1.4864974e+00	2.8952979e-01	1.0619535e+00	-7.2771814e-01	-1.1176277e+00	-1.2330800e+00	5.7177612e-01
-5.1931503e-01	-9.9970826e-01	-1.5247911e+00	-1.9984226e-01	8.6512483e-01	-5.3859873e-01	-3.8662510e-01	7.1058847e-01	1.1123595e+00
-7.8324556e-01	-8.5915480e-01	-1.1921158e+00	-3.8631799e-01	8.6228949e-01	-1.3004293e+00	-1.1943890e+00	-1.4748190e+00	1.1106323e+00
-7.3482684e-01	-1.0549651e+00	1.1873612e+00	8.2554896e-01	3.3254535e-01	-2.5532844e-01	6.8133137e-01	-1.1706359e-01	3.2761932e-01
-6.3406095e-01	3.5019306e-01	5.8391479e-01	-1.4133207e+00	1.9643535e-01	1.1042135e-01	3.1163019e-02	-8.5081447e-01	8.3381957e-01
-3.8002411e-01	1.4917696e+00	-4.7963953e-01	-9.9299669e-02	-3.2499064e-01	-8.2965358e-01	-8.8911677e-01	8.9088512e-01	9.0983136e-01
-2.0740472e-01	-8.7944237e-01	2.5164692e-02	-7.4383603e-01	1.1118591e+00	1.5420034e+00	1.1707765e+00	2.7558116e-01	5.9696427e-01
1.3167906e+00	4.0550344e-01	-1.1720326e+00	-1.2550099e+00	8.2339893e-01	1.4531213e+00	1.4456742e+00	9.8498494e-01	6.9166327e-01
-1.2203709e+00	1.1818238e+00	-5.6576537e-01	-2.9756945e-01	1.5025778e-01	-1.3105697e-01	3.6945981e-01	-1.5513766e+00	7.7961207e-01
6.8549780e-01	-1.3769467e+00	7.8242265e-01	1.6572143e-01	-4.5796647e-01	-4.1803792e-01	-1.4176549e+00	1.2325113e+00	4.1029571e-01
9.4129226e-01	-1.3723521e+00	-5.2940910e-01	-1.3126691e+00	-1.4049381e-01	-1.3621885e+00	-6.8676610e-01	-8.4536341e-01	5.6987225e-01
-7.6152340e-01	4.5170205e-01	-7.8828319e-01	1.3759661e+00	1.1981470e+00	-1.5165399e+00	-2.6639200e-01	1.4007784e+00	6.6740683e-01
-7.5336765e-02	-1.4730068e+00	-5.7939708e-01	5.9932466e-01	-3.5196960e-01	-7.4540026e-01	-4.8073134e-01	-2.1241015e-01	1.1590186e+00
-1.2316985e-01	-1.0757625e+00	1.0105265e+00	9.0352103e-01	6.5948844e-02	7.2941640e-01	5.2475362e-01	-1.1282066e+00	3.3605139e-01
1.9383859e-01	-4.7481464e-01	4.6925521e-01	-9.8088887e-01	-5.7999057e-01	8.0690679e-01	1.0834833e+00	8.8514175e-01	7.4679095e-01
1.3658654e-02	-5.6425073e-01	1.3747468e+00	1.2789322e+00	4.6047269e-01	-5.7302948e-01	1.4320972e+00	1.1362394e+00	2.3484380e-01
2.2473207e-01	1.1062775e+00	-1.0439894e+00	2.3655373e-01	1.4217560e+00	1.2165988e+00	1.5161193e+00	-9.6559757e-01	4.9365343e-01
8.7753607e-01	1.2604145e+00	-5.3524240e-01	-1.4977362e+00	4.9897565e-01	-1.2498892e+00	-4.1285552e-02	6.6927042e-01	5.8200113e-01
-1.0288474e+00	2.7185928e-02	-1.4392991e+00	1.1289146e+00	1.3729316e+00	9.4168875e-01	4.0570932e-01	1.5261662e+00	1.1869200e+00
-5.1305652e-01	1.3829607e+00	-3.6468028e-02	-1.5522846e+00	-1.3724339e-01	-3.8089626e-01	1.5004215e+00	-8.2795782e-01	9.1414081e-01
7.3082420e-01	-1.2243229e+00	-3.0757674e-01	-1.4616708e+00	-7.2069317e-01	8.4234469e-01	1.9375510e-02	-1.3732271e+00	9.9882498e-01
-6.6499379e-01	2.3765415e-01	-1.5223186e+00	9.5342134e-01	1.2911795e+00	1.2706246e+00	-1.0814474e+00	1.4537276e+00	1.2177849e+00
1.2359741e+00	1.2890127e+00	-4.7800808e-01	-1.1116207e+00	-1.2684361e+00	-1.1592302e+00	1.3681540e+00	6.3329945e-01	2.4200197e-01
8.0586716e-01	1.3667430e-02	-8.2937843e-01	4.2904582e-02	2.4269017e-01	9.7515599e-01	1.2478897e+00	1.4798611e-01	6.4189802e-01
8.0346422e-01	3.7223107e-01	-1.1661258e-01	-1.4689983e+00	1.1064632e+00	-2.4213077e-01	8.8759285e-03	-9.3884357e-01	9.7400840e-01
1.2579646e+00	1.1765876e+00	4.4622917e-01	3.2210844e-01	1.2399292e+00	-1.1293172e+00	1.5228754e+00	1.0759652e+00	9.2715356e-01
-3.0817959e-01	-1.4173750e+00	7.9207182e-01	7.1243472e-01	1.3052703e+00	1.0685385e+00	4.1111827e-01	7.3917275e-01	3.5599854e-01
9.1183716e-01	8.7597168e-01	1.4229769e+00	1.2807859e+00	-6.3430370e-02	-1.5592550e+00	1.3025950e+00	1.4190860e+00	4.9834032e-01
5.5811590e-01	9.5280045e-01	-9.7215858e-01	-2.4752026e-02	-1.0743232e+00	7.6697813e-01	-1.0457073e+00	-3.9232836e-01	4.6749291e-01
-5.4171534e-01	1.0193987e+00	3.5408396e-01	-1.3170715e+00	-1.4175973e+00	6.4679658e-01	-1.1324789e+00	3.4030454e-01	3.1159978e-01
-2.7420931e-01	-1.2124178e+00	9.1265239e-01	-3.5965177e-01	2.8091486e-01	7.9952035e-01	1.3372740e+00	-1.3417460e+00	2.4354668e-01
8.0548871e-02	-7.3528355e-01	-1.4481273e+00	-2.4299214e-01	-4.7773337e-01	9.4680151e-01	6.1075599e-01	-3.7361061e-01	8.0876888e-01
-2.4155085e-01	1.1149174e+00	-7.5640941e-01	1.0156657e-01	6.4604997e-01	7.2618081e-01	1.3927758e+00	7.7024055e-01	4.7610657e-01
-8.0750695e-01	-1.1840496e+00	1.0524674e+00	1.1445341e+00	8.1768235e-01	-1.6655540e-01	3.7594478e-01	-1.0704772e+00	1.8135921e-01
-8.9068510e-02	-1.4738271e+00	-1.4890950e+00	2.1219571e-01	1.4609859e+00	-1.3759410e-01	7.6107824e-01	3.9054090e-01	1.3972869e+00
1.5652495e+00	8.4528577e-01	-1.2920195e+00	6.6557677e-01	1.0224944e-01	-3.3186188e-01	-1.1232595e+00	1.0337716e+00	7.8154796e-01
-5.4779250e-01	4.3594354e-01	-2.8347086e-01	-8.6260434e-01	5.5154142e-02	-1.2755870e+00	-7.9179709e-01	-1.5494352e+00	7.0742089e-01
1.2595582e+00	7.0892459e-01	1.5013101e+00	6.5894437e-01	2.0583774e-01	-5.6189333e-01	5.2721962e-02	-6.9611021e-01	5.9005484e-01
1.3434367e+00	-1.1653264e+00	-7.5354588e-01	7.6394337e-01	6.2136241e-01	-1.1364897e-01	1.6888784e-01	-2.3331138e-01	1.2072699e+00
5.1396655e-01	-9.5159055e-01	-1.0856829e+00	-9.2992406e-02	5.8403630e-01	-9.9309572e-03	-1.5018157e+00	-5.5675188e-01	1.1463599e+00
-1.1440585e+00	4.6579469e-01	-7.0259245e-01	-1.5518162e+00	1.5627262e+00	-4.0518722e-01	-1.4606273e+00	1.4756335e+00	5.4425330e-01
1.4973731e+00	-2.3756210e-01	7.7550175e-01	1.2660899e-01	1.0239081e+00	9.9131735e-01	-3.5813740e-01	1.2402916e+00	6.7839758e-01
-9.4971430e-01	2.5804254e-01	-6.0995099e-01	1.0591275e+00	-8.2113726e-01	1.2048172e+00	7.6314057e-02	1.1132355e+00	3.8196909e-01
5.8401794e-01	1.5230984e+00	-4.2946338e-01	4.9143606e-01	1.6263913e-01	-1.3443872e+00	8.4055630e-01	-1.1771770e+00	8.2877420e-01
1.2540822e+00	1.0178540e+00	1.3888673e+00	3.1884480e-01	2.9026979e-01	-7.8088973e-01	-5.1238187e-01	9.3660805e-01	5.4708942e-01
4.1489603e-01	1.1009123e+00	6.5846581e-01	-7.3243909e-01	-3.2906493e-01	1.1604326e+00	-4.9666239e-01	-9.4924179e-01	5.7459474e-01
-1.1780521e+00	-9.4715979e-01	-9.9607847e-01	-1.3437279e+00	-1.3911848e+00	3.8397849e-01	-1.9306313e-01	-8.9929498e-01	7.4105644e-01
-1.2042868e+00	-4.6453944e-01	4.5648005e-01	8.7458291e-01	1.2319553e+00	6.9520267e-01	4.5318772e-01	-2.4844682e-01	4.3117774e-01
8.3335303e-01	-6.5655822e-01	2.9090271e-01	-3.9708507e-01	-7.6369666e-01	6.8824569e-01	1.5054653e+00	-4.6908186e-01	4.0999148e-01
9.4432946e-01	-1.5005334e+00	8.8371402e-01	-1.0660324e+00	1.0978697e+00	1.1113986e-03	-3.1853431e-02	1.5386719e+00	4.3889159e-01
1.9178791e-02	1.2411685e+00	-8.6857705e-01	-3.0397678e-01	1.3231266e+00	-1.7027940e-01	-1.2898679e+00	-1.1327245e+00	1.1603264e+00
-1.2461042e+00	1.4373891e-01	8.0664989e-01	-7.0806723e-01	-1.5455064e+00	1.0496847e-01	1.3210975e+00	3.5127971e-01	4.8954518e-01
-1.4164645e+00	-6.4941369e-02	1.3924601e+00	-1.3297569e-01	-6.3753213e-01	-1.3699122e+00	-1.0905718e+00	9.0548597e-01	3.7044618e-01
4.6979392e-01	-1.3369312e+00	1.3536902e+00	-1.2500540e+00	9.7009222e-01	6.1889069e-01	-1.1880339e+00	6.2791268e-01	5.7947273e-01
1.0040076e+00	-1.1319897e+00	5.7595435e-02	1.3134032e+00	-5.2600165e-01	-1.1743358e-01	6.7762516e-01	7.1870307e-01	6.0809648e-01
8.6183774e-01	1.3415757e-01	3.9594170e-01	1.5369730e+00	-6.8000206e-02	-7.8601874e-01	5.7268214e-01	-1.8133851e-01	4.6775138e-01
-9.7679193e-01	-8.7721592e-01	6.9899405e-01	-1.4119739e+00	6.6026445e-01	-2.1978436e-01	-7.7116766e-01	-4.1138975e-01	7.2391759e-01
1.0212893e+00	1.2631444e-01	-1.5635923e+00	5.4613615e-01	9.5938308e-01	5.9714934e-01	1.1963602e+00	4.1788256e-01	7.8953152e-01
-8.5242794e-01	-7.4980258e-01	1.2733753e-01	-8.2349032e-01	-1.4437307e+00	-1.0995086e+00	1.0323349e+00	-1.2489789e+00	7.1004814e-01
-1.0938148e+00	-1.0038165e+00	7.3723900e-01	1.4553931e+00	8.8022017e-01	-5.9250330e-01	-5.6416576e-01	5.3290474e-01	8.8641436e-01
8.5435732e-01	-7.9201406e-01	3.3446037e-01	3.5087738e-01	1.0051045e-01	6.4574524e-01	-6.0728686e-01	-1.5063573e-01	7.7453432e-01
-1.0365697e+00	-4.5224712e-01	9.6619651e-01	4.2678024e-01	-8.9771253e-01	-1.1624488e+00	3.6422918e-01	3.8895832e-01	8.3393573e-01
-1.4960819e+00	-1.4047274e+00	-2.7629029e-02	6.3939840e-01	1.2150523e+00	2.8737322e-01	-1.3641843e+00	-4.3184201e-01	1.2694320e+00
6.5839994e-01	-1.8530007e-01	5.9463004e-01	-1.0195049e+00	1.0317725e+00	1.2537820e+00	-5.0305644e-01	-8.8965850e-01	7.3142314e-01
1.0384726e+00	-1.0199112e+00	5.4079050e-01	-5.7303561e-01	-5.9176481e-01	-1.4895064e+00	-8.4372236e-01	1.4906938e+00	3.1703088e-01
-1.0794796e+00	-1.1176106e+00	4.3832546e-01	1.1136520e+00	4.9117310e-01	1.2184018e+00	7.0745399e-01	-1.1020492e-01	1.0046675e-01
-1.1634770e-01	-9.9249153e-02	-9.8845559e-02	-4.6046655e-01	-9.5924621e-01	7.7785886e-01	-7.4890785e-01	1.3255991e+00	6.7175247e-01
-1.3851123e+00	1.0518679e-01	6.0520968e-01	-1.3186370e+00	6.0239952e-01	1.3068715e+00	1.4674574e+00	-8.3034138e-01	4.5327272e-01
-3.8120445e-01	-8.4232279e-01	-7.1789593e-01	-1.5373239e+00	-8.2439490e-01	-1.4263152e+00	-1.0878210e+00	-5.9299466e-01	6.3800059e-01
-1.1956895e+00	-9.0270078e-01	1.1804992e+00	-1.3455328e+00	-1.1814761e+00	1.4143860e+00	1.0615935e+00	-1.3294152e+00	2.0425331e-01
8.1489385e-01	-9.4104455e-01	1.4916334e+00	-1.1864563e+00	9.3884257e-01	-8.4554002e-01	1.0979745e+00	-4.7363496e-01	5.2683207e-01
-1.4230913e+00	-1.3583005e+00	-2.7022361e-02	-1.0832291e+00	-1.0928566e+00	-1.5676174e+00	-5.7427837e-02	4.1299437e-01	6.2206953e-01
-9.4982786e-01	9.9791660e-01	1.3661168e+00	-3.0211985e-01	1.2511504e+00	-1.5495497e+00	-7.2071903e-01	1.4182120e+00	4.3583696e-01
-1.3245193e+00	-9.7887796e-01	1.5653569e+00	-9.1459256e-01	1.4056571e+00	5.2130773e-01	8.5659959e-01	6.2499044e-01	3.9398471e-01
1.3024331e-01	5.1879588e-01	1.2560767e+00	2.5563725e-01	1.0128923e-01	-2.8283009e-01	-1.0497983e+00	-1.2714508e+00	6.1578314e-01
-6.9070816e-01	1.4827165e+00	-6.2110939e-01	-1.2034565e+00	-3.7515141e-01	-2.9571588e-01	-7.7540512e-01	-1.6037623e-01	7.9279249e-01
-5.4718978e-01	9.0316546e-01	5.2683673e-01	-9.1946919e-01	6.6916601e-03	-9.7280852e-02	-9.0755452e-01	4.3206664e-02	7.8799094e-01
-1.1768596e+00	-6.7376106e-01	1.5368022e+00	-2.4402166e-02	-6.3060369e-01	-1.3711028e+00	-8.3641622e-01	4.6650698e-01	6.2693868e-01
-1.1485151e-02	1.5393792e+00	-1.1404771e+00	1.4214292e+00	1.1773569e+00	-5.4226714e-01	9.7974366e-01	-8.3246755e-01	9.9877025e-01
-1.3937833e+00	1.3311282e+00	-1.1426199e+00	1.2900300e+00	-1.0552212e+00	-1.2355070e-01	1.4646667e+00	1.3715284e+00	4.9842317e-01
1.5399689e+00	9.9098742e-01	5.4352613e-01	1.4032451e+00	-8.1157561e-01	7.6196832e-02	-8.6657175e-01	1.4117629e+00	7.1720720e-01
-1.3243621e+00	-1.1986575e+00	-7.0774916e-01	4.0425826e-01	6.4406746e-01	-1.1296458e+00	-4.7778586e-02	-9.5103507e-01	1.2968801e+00
-3.6925111e-01	1.1965054e+00	-1.0703488e+00	-8.9636518e-01	-1.0865106e+00	-1.3119225e+00	1.2330193e+00	3.7707139e-01	5.0227796e-01
-1.3578622e+00	3.3156910e-01	-5.9354391e-01	-1.2727449e+00	1.0944868e+00	1.3566485e+00	1.4096738e+00	8.4651868e-01	8.8717329e-01
-1.0601728e+00	-5.0351873e-01	-1.1359009e+00	8.1419381e-02	1.0154425e+00	-4.8749683e-01	-1.5039816e+00	-8.3367348e-01	1.2664289e+00
7.8938859e-01	8.1128342e-01	3.7138886e-01	-1.3188626e+00	1.4108150e+00	-8.5598793e-02	-1.6404191e-01	-4.6935196e-02	9.4609355e-01
3.0832219e-01	7.2832816e-01	-4.1202808e-01	9.5440688e-01	-1.1741437e+00	1.9052136e-01	1.2660389e+00	-3.0009116e-01	6.3034602e-01
1.4846835e+00	1.3664641e+00	-8.8577091e-01	-2.5566040e-01	-1.4904467e+00	8.0964766e-01	3.0833977e-01	-1.3759199e+00	9.5944414e-01
-5.9515429e-01	1.1190897e+00	8.5583731e-01	8.1441219e-01	1.1215241e+00	1.5104618e+00	-1.3614440e+00	1.7837051e-01	7.1611737e-01
7.2846302e-02	-1.7412065e-01	-1.2951626e+00	-9.3448735e-02	-1.0004399e-01	-8.7894753e-01	-1.5703043e+00	7.9368974e-01	8.4684966e-01
-8.9333665e-01	1.5185282e+00	2.9794094e-01	2.0343182e-01	-6.8721955e-01	-7.0241113e-01	4.1577256e-01	3.4107535e-01	8.5709691e-01
-6.3777139e-01	-3.9453554e-01	-2.0524146e-01	1.0257539e+00	1.5371455e+00	6.8130380e-01	9.8733169e-01	-9.5323469e-01	2.3245408e-01
9.0413227e-02	9.4333240e-01	-2.4445257e-02	-1.2146241e+00	1.4872334e+00	-4.3233150e-01	1.9126972e-01	1.1071662e+00	9.6871314e-01
-9.5573572e-01	-1.0305291e+00	6.9721133e-01	-1.1897857e-01	1.4204065e+00	3.0831922e-01	8.2096579e-01	4.8948467e-01	6.3472085e-01
-8.7007846e-02	-5.0264336e-01	-1.0970585e-01	1.5216563e+00	-1.9025009e-01	1.4348943e+00	9.7178638e-02	-1.0622787e+00	5.6077139e-01
-1.5002912e+00	-1.8430024e-01	2.8871718e-01	-1.2286552e+00	6.0812360e-01	1.4028327e+00	-3.4680937e-01	-4.6803211e-02	1.0342999e+00
-9.7095596e-01	7.6266666e-02	-1.2910576e+00	-3.2013545e-01	1.1325039e+00	-2.4375538e-01	-1.1707100e+00	-1.2233963e+00	1.2851845e+00
-1.4245140e+00	4.4051880e-02	1.7498711e-01	1.0316705e+00	-9.1638924e-01	-1.5982863e-01	-3.2840437e-01	1.0309189e-01	8.8171713e-01
2.7066795e-01	-1.0359185e+00	4.7764596e-01	8.3702985e-01	1.4748136e+00	-1.7801740e-01	2.8597385e-01	-1.4936675e+00	4.6940733e-01
9.0116395e-02	2.3546061e-02	1.0265028e+00	-9.1270733e-02	2.6926683e-02	-1.1421979e+00	-2.7426284e-01	3.9644247e-01	7.1533296e-01
3.3859534e-01	-1.0203127e-01	-1.1939383e+00	-8.8998902e-01	1.6741964e-01	1.3522421e+00	-8.1917289e-01	-3.0946504e-01	1.0885030e+00
1.3475521e+00	4.6997650e-01	-1.1681597e+00	-9.2281246e-01	-1.0451724e+00	8.5216607e-01	-1.3796918e+00	1.2985009e+00	5.9147887e-01
5.6595110e-01	9.3105305e-01	-1.4471092e+00	3.3393354e-01	-1.5679810e+00	-1.6581115e-01	-3.8513579e-01	-7.3908656e-01	3.5399707e-01
-8.0246542e-01	-6.4344625e-02	6.4573234e-01	1.5365106e+00	-1.3767175e+00	-1.9534159e-01	-1.2963118e+00	2.9620151e-02	8.7695058e-01
-1.7899780e-01	-7.3224447e-01	-1.3791118e+00	2.4123705e-01	-6.6148926e-01	-1.4182346e-01	-1.6739731e-01	1.4542344e+00	1.0343917e+00
1.2296620e+00	-1.2143785e+00	-6.1309377e-02	-1.3250407e+00	4.4647197e-01	8.4195578e-01	1.4203986e+00	-2.7373717e-01	8.7710432e-01
1.5327094e+00	8.6863851e-01	1.5682899e-02	7.9177610e-01	-1.4104636e+00	1.0174332e+00	-3.2267709e-01	-1.4089600e+00	4.5769511e-01
-8.1283434e-01	2.2631025e-01	-3.1129134e-01	-4.0552462e-01	7.9637672e-01	3.1181697e-01	-8.4494763e-01	9.3405680e-01	9.9520124e-01
1.4797193e+00	-8.7235228e-01	-1.1217583e+00	-1.5377491e+00	1.5188210e+00	5.3133184e-01	-1.0360286e+00	1.5407142e-01	1.3133337e+00
7.9416274e-01	1.8819107e-01	-6.9350582e-01	9.3391570e-01	1.3838817e+00	-1.4537521e+00	1.3153651e+00	8.0605556e-01	1.0705313e+00
-1.1340008e+00	-6.5656405e-01	-4.4349222e-01	9.2422245e-01	-1.4519479e+00	-1.0459475e+00	-4.6787544e-02	8.2834239e-01	1.2240479e+00
8.9053204e-01	1.5429807e+00	1.2255502e+00	1.3725903e+00	1.0033144e+00	1.1127400e+00	-9.6009124e-01	1.5534188e+00	6.5319334e-01
6.2463026e-01	-9.7125698e-01	1.5402752e+00	4.0948731e-01	-1.3634447e+00	-7.9416975e-02	-1.0336204e+00	-1.4661113e+00	4.5614122e-01
-1.0418712e+00	-2.0067464e-01	6.8190537e-01	-9.7626702e-01	-6.3896684e-01	4.1577590e-01	9.4859209e-01	-1.4216130e+00	5.7956823e-01
5.0790040e-01	1.3318854e+00	2.5354238e-01	4.1869222e-01	-1.1520301e+00	1.0435382e+00	-5.9547530e-01	-1.2367698e+00	3.8355147e-01
5.7485111e-01	1.1496079e+00	1.2870865e+00	-2.0745445e-01	-5.3436879e-01	-7.6571062e-01	9.6082365e-01	1.5280013e+00	5.6563165e-01
1.1252024e+00	6.6439100e-01	-9.4465346e-01	4.8094657e-01	6.7720518e-01	-1.3349002e+00	7.7676529e-01	-1.4023578e+00	8.8799247e-01
-1.1113028e+00	1.1992389e+00	8.1849301e-01	-4.8895856e-02	-2.0266894e-01	-1.5546658e+00	-1.3649074e+00	-1.1994557e+00	6.5268067e-01
-8.9766492e-01	-8.5005870e-01	-6.2221536e-01	1.3046177e+00	-7.7040717e-01	-6.4241840e-01	-8.8965727e-02	3.4789257e-01	9.3488319e-01
-1.1263724e+00	1.0268115e+00	7.8832259e-01	1.5343158e+00	1.4115559e+00	5.2794896e-01	1.5113348e-01	5.2642504e-01	6.1941854e-01
2.9594024e-01	8.5252934e-01	1.2415321e+00	1.0535763e+00	-1.2878027e+00	1.3805990e+00	-1.4479934e+00	9.0068878e-01	5.4180445e-01
7.2646479e-01	-3.4341326e-01	-2.8355653e-02	1.4403585e+00	1.4738372e+00	-7.6117445e-02	1.4930794e+00	-1.4586064e+00	2.2353621e-01
1.4647317e+00	-6.4092915e-01	9.4862947e-01	-1.0082451e+00	-6.7693677e-01	-6.7769441e-01	-8.5687572e-01	-9.4960509e-01	4.2508483e-01
2.2505361e-01	4.2499349e-01	3.2852236e-02	1.7483215e-01	-1.5693189e+00	1.4049494e+00	-4.4945518e-01	-7.2198792e-01	4.7986385e-01
-1.5406875e-03	-1.1161687e+00	-7.7278258e-01	1.0148327e+00	1.2691512e+00	7.7465264e-01	1.5372036e+00	1.5214683e+00	6.2768765e-01
-7.6159420e-01	-9.9728299e-01	-8.1285328e-01	5.8602305e-01	-7.9046184e-01	8.2697406e-01	-6.7758102e-01	-1.2472145e+00	6.1541677e-01
-1.2652128e+00	-9.3845349e-01	1.1613142e+00	3.9648199e-01	5.0320536e-01	5.4711575e-01	1.6914021e-01	-1.2275357e+00	3.5527249e-01
1.0086850e+00	1.3488755e+00	-5.0757645e-01	3.5480908e-01	2.0508862e-01	-6.7354344e-02	-4.0188397e-01	-3.5330398e-01	9.6321989e-01
9.3537288e-01	8.1789234e-01	-1.4133589e+00	5.3327890e-01	5.9723431e-01	-1.0510995e+00	-3.9701318e-02	-3.6983137e-01	9.5794219e-01
2.8231414e-01	-1.2929189e+00	-7.4060928e-01	-1.4535777e-01	3.2854432e-01	-6.5366912e-01	-1.2424123e+00	1.4559947e+00	4.9727774e-01
1.0488116e+00	3.0848827e-01	-4.3007932e-01	1.1311071e+00	-1.0754505e+00	-6.7428579e-02	9.4216207e-01	1.0380052e+00	3.4780637e-01
-9.9069359e-02	1.1344583e+00	4.6149727e-01	7.3937491e-01	-1.5134136e+00	8.4281244e-01	1.2909311e+00	4.8954451e-01	3.5994579e-01
-1.4606512e-02	5.1555612e-01	-2.0769150e-01	-1.4664836e+00	1.5340186e+00	-2.9257234e-01	8.3936462e-01	-5.6659580e-02	1.0951096e+00
-4.4742276e-01	4.3922977e-01	-3.6160565e-01	-1.3951488e+00	-7.9988131e-01	-6.7084932e-01	1.4501780e+00	-3.7498951e-01	9.1700504e-01
1.1384017e+00	-6.0799478e-01	1.4756295e+00	5.8237319e-01	-7.3013024e-01	2.1152682e-01	6.6598099e-01	-4.1387764e-01	3.8260758e-01
8.1781859e-01	1.0326014e+00	1.1726274e+00	-1.2565147e+00	-2.3803925e-01	-1.1516801e+00	-3.5208269e-01	-5.5539953e-01	4.6805444e-01
6.0910683e-01	7.7359855e-01	1.1383903e+00	-4.5696008e-01	-1.4782772e+00	-9.3446105e-01	1.3068722e+00	-9.2814896e-01	3.0261404e-01
-1.1919026e+00	-1.1811946e+00	6.2657884e-01	1.0659333e+00	1.4518794e+00	-6.6513400e-01	-1.4145133e+00	-1.3920008e+00	1.0133572e+00
-1.5117632e+00	-6.1340889e-01	2.9206931e-01	-1.3615891e+00	9.8670910e-01	-1.1204447e+00	-1.2932323e+00	8.2615689e-02	4.4299884e-01
9.9810186e-01	1.1438561e+00	-1.5003945e+00	-8.6683392e-01	-8.4775103e-01	-6.0809411e-01	1.3239014e+00	-6.2060289e-02	4.7539722e-01
-1.0067641e+00	1.3845576e+00	4.3374318e-01	-1.3125679e+00	-1.0288115e+00	-6.3687386e-01	-1.0898964e+00	-3.8515423e-02	5.1204713e-01
-6.5689070e-02	4.8354909e-01	1.4267012e+00	-6.4974630e-02	9.1495127e-02	-5.3272255e-01	7.3839042e-01	-1.6062220e-01	6.4127661e-01
-1.3371851e+00	-2.9072051e-01	-1.2095578e+00	1.2456454e+00	1.5197876e+00	7.1116369e-02	8.3675328e-01	-9.4918034e-01	9.1014799e-01
8.8449389e-01	-9.6301209e-01	2.0755121e-01	-1.0916208e-02	-1.2189755e+00	1.4476091e+00	1.5437415e+00	1.3346847e-01	6.0102153e-01
-3.2762466e-01	1.4110248e-01	1.1454026e+00	-1.2563284e+00	-9.9630426e-01	1.4724030e+00	-7.5104545e-01	1.0734849e-01	6.5113447e-01
8.2434458e-01	-3.9300033e-01	-8.9818589e-01	-4.6692207e-01	-1.9682400e-01	3.5175379e-01	9.8361207e-02	9.3192231e-01	9.4149521e-01
3.3572336e-01	-1.5287085e+00	-4.5751263e-01	1.3916417e-01	7.6102067e-02	-5.5142023e-01	6.7906933e-01	-1.1626539e+00	9.0029219e-01
2.0206906e-01	-1.0587411e+00	1.2039787e+00	-1.5542399e+00	4.1923309e-01	-2.1408606e-02	-2.8780695e-01	-1.7332597e-02	7.0699519e-01
1.1307911e-01	-2.8146913e-01	2.7118894e-01	2.3273239e-01	-5.4173075e-01	1.4687179e+00	8.8131471e-01	8.5915751e-01	3.0971474e-01
-1.4291562e-01	5.8693786e-01	-5.7849753e-01	2.5035784e-01	-5.3321155e-01	1.2480917e+00	-3.5305112e-01	1.1004516e+00	7.0902106e-01
1.3355946e+00	6.3648039e-02	4.2134575e-01	1.1716952e+00	1.2773062e+00	2.6339914e-01	7.3838624e-01	7.3336758e-01	6.1484457e-01
6.5868932e-01	-1.5504985e+00	4.0812798e-01	1.1786604e+00	1.1832745e+00	4.4526912e-01	7.6650747e-01	1.2409324e+00	4.2542226e-01
-3.8105679e-01	2.8359422e-01	1.3101359e+00	-1.1379372e+00	1.0130784e+00	3.6439710e-01	-9.8040485e-01	-6.8273324e-01	7.2007714e-01
1.2859768e+00	5.7201096e-01	3.0655569e-02	7.0596881e-01	-6.2338713e-01	1.4580156e+00	-1.0903537e-02	1.5403652e+00	4.2585315e-01
-7.4468494e-01	5.1473826e-01	6.9539365e-03	-5.7759978e-01	-5.6028344e-02	4.4550485e-01	-1.0433781e+00	-9.4779182e-01	8.8917498e-01
1.8535741e-01	-7.4022928e-01	6.3588214e-01	-1.9822488e-01	8.0941573e-01	1.1847962e+00	3.1465311e-01	1.4791742e+00	6.3732451e-01
-1.1579099e+00	-3.2667359e-01	-4.2714350e-01	-1.4773414e+00	7.5398958e-01	1.4554439e+00	1.0744023e+00	1.0573327e+00	1.0691382e+00
1.1748493e+00	1.1009551e+00	-4.6152584e-01	1.4711596e+00	-8.8187617e-01	1.2045718e+00	-3.9564382e-01	-1.3993610e+00	5.2453302e-01
7.8229235e-01	-2.2763809e-01	-2.7247318e-01	1.4459653e+00	3.4128626e-01	8.1489925e-01	1.1659212e+00	-1.0972637e+00	3.9698919e-01
4.2219594e-01	5.4652631e-01	9.8532285e-01	-1.0226056e+00	-5.4993394e-01	-1.3322905e+00	1.5243138e+00	-5.6149937e-01	6.7108798e-01
-1.0106763e+00	-5.4927686e-01	9.8631996e-01	7.2069383e-01	-1.7415329e-01	1.4662190e+00	-5.4543325e-01	2.2439303e-01	3.4050470e-01
1.5558508e-01	1.4445860e+00	-1.1048517e+00	-1.2800906e+00	9.6993720e-01	9.0626433e-02	7.0660872e-02	1.4624016e+00	1.0836962e+00
1.1134123e+00	9.2837780e-01	7.1081578e-01	-8.5671799e-01	1.0324492e-02	-5.1398049e-01	7.5254647e-02	-1.2369537e+00	6.3839964e-01
-1.3460711e+00	-1.0449496e+00	-7.9606714e-01	-9.4012277e-01	7.3614808e-01	9.0964353e-01	-1.2569870e+00	-1.5619294e+00	1.2254775e+00
-8.0780003e-01	-9.6453988e-01	5.4262027e-01	1.5676903e+00	8.4894918e-01	1.3888956e+00	1.0293033e+00	-1.9884987e-01	4.4807241e-01
1.2683289e+00	-4.0364434e-01	-2.2451491e-01	-3.6649077e-01	-8.2497435e-01	1.1346228e+00	-1.2500349e+00	5.8480903e-01	6.8820976e-01
1.0973445e+00	-1.3518371e+00	-3.6937064e-01	1.0527873e+00	-1.4954922e+00	1.3742444e-01	-1.5060472e+00	-1.1581212e+00	8.0366147e-01
-1.2221141e+00	-3.2794931e-01	-2.2524568e-01	7.4553898e-01	1.1460513e+00	6.2194657e-01	-3.2253495e-01	7.6436907e-01	1.2222701e+00
-3.3881946e-01	-1.4904684e+00	-8.5002334e-02	-1.5395217e+00	5.7949624e-01	9.7719880e-01	1.5440493e+00	7.7859322e-01	9.4721818e-01
1.1688398e+00	7.5687040e-01	7.9043816e-01	-5.8460557e-01	6.5612119e-01	-4.6616638e-01	1.2813582e+00	1.0829141e+00	7.6312397e-01
3.1155441e-01	4.1223683e-01	-9.0112564e-01	1.4359532e+00	4.3856857e-01	2.7371368e-01	1.7033547e-01	1.2912984e+00	8.9047332e-01
-7.3994851e-01	1.2526087e+00	3.9946908e-01	3.5030078e-01	8.4562087e-01	1.0141132e+00	8.3731384e-01	7.2969713e-01	4.2365187e-01
1.2507182e+00	7.8282846e-01	2.9329912e-01	1.6066014e-01	-2.1518469e-01	1.0597871e+00	1.5401639e+00	-7.5813004e-01	5.3836655e-01
4.2426470e-01	7.8635029e-03	3.1945613e-01	-1.5547908e+00	-6.3598109e-01	-9.8932393e-01	-1.1895051e+00	4.0814628e-01	3.7010441e-01
-7.9853381e-01	2.1500119e-01	1.1735808e-01	3.9890556e-01	-1.2359391e+00	8.8264926e-01	1.0839629e+00	-1.5238209e+00	5.9230390e-01
-7.3876027e-02	6.9347026e-01	-4.8297914e-01	2.4708751e-01	-2.1702677e-01	8.5654982e-02	6.8499658e-02	-5.9513320e-01	7.5992402e-01
-7.0528194e-01	-1.5407664e-01	4.4496856e-01	-3.8568992e-01	-1.7989502e-01	7.5385087e-01	1.4508389e+00	4.2727172e-01	4.7874549e-01
-4.4441104e-01	-8.9380751e-01	-1.5455620e+00	-1.1848453e+00	-1.2835332e+00	-7.1672496e-02	-7.9233083e-01	-5.2509146e-01	8.1251205e-01
1.4910396e+00	8.7325138e-01	1.5688348e+00	8.6109856e-01	9.7422688e-01	-1.3696550e+00	5.0703329e-01	-4.7843156e-01	5.8686165e-01
-5.8194447e-01	-7.8496930e-01	1.8668415e-02	-8.3392333e-01	-1.4978485e-01	-1.3424191e+00	-1.4323874e+00	1.4779029e+00	5.4164679e-01
-9.6271961e-01	-1.4314450e+00	-3.9920801e-01	-1.1045276e+00	-1.0181916e+00	8.8092197e-01	-1.0996534e-01	-1.4592473e+00	1.0537976e+00
-1.2263265e+00	1.9613381e-02	9.5280387e-01	-1.2486445e-01	-4.9025474e-01	-6.7066110e-01	-9.3105285e-01	8.4501133e-01	6.3992644e-01
1.1197433e+00	-2.2512634e-01	1.0768100e+00	-1.2976720e-02	6.8608555e-01	2.3335616e-01	6.7762255e-02	-1.0348870e+00	4.2523438e-01
1.3856584e+00	-1.2208643e+00	-7.7028473e-01	-1.3298478e+00	1.3948165e+00	1.3093189e+00	-1.5179133e+00	-1.4896528e+00	1.0886460e+00
1.3357366e-01	-1.3250928e+00	3.2791725e-01	-1.4625264e+00	1.1640516e-01	-1.1343953e+00	1.3059238e+00	-1.2432751e+00	8.0972274e-01
-1.2662232e+00	-8.5054912e-02	9.5173689e-01	-8.6075794e-01	-7.9076636e-01	5.4319606e-01	1.4949963e+00	-9.9195388e-01	1.8407744e-01
-2.6417689e-01	-9.3252698e-02	-1.1479233e+00	2.7553826e-01	-1.4732623e+00	2.7910081e-02	-5.4634776e-02	6.6329060e-01	6.4909031e-01
-9.5056998e-01	3.5663091e-01	-6.2653937e-01	2.6396342e-01	9.1369968e-01	9.8743333e-01	-9.0162059e-01	1.5544022e+00	1.1708466e+00
-1.2309727e+00	-2.6304573e-01	3.7146719e-01	5.0436446e-01	4.4561227e-01	-1.2420490e+00	1.5057609e+00	-6.4590092e-01	6.3788051e-01
1.5707529e+00	-7.8863856e-01	9.0439863e-01	8.3644008e-01	-1.5152576e-01	7.6581391e-01	-1.3471574e+00	-1.4541770e+00	4.7143299e-01
8.4023495e-01	-2.6890081e-01	1.2024928e+00	-5.7870080e-01	1.1382022e+00	-7.0659484e-02	-2.1659896e-01	1.2379021e+00	5.6746585e-01
3.6976829e-01	1.3359322e+00	4.3032631e-01	1.4653804e-01	6.0632309e-01	-5.1921333e-02	7.2719462e-01	-1.3467689e+00	4.8807251e-01
6.2537052e-01	4.9359445e-02	5.4805165e-01	-1.4373202e-01	-8.5442931e-01	7.2090865e-01	1.1644800e+00	3.0740622e-02	3.6856726e-01
-1.1666928e+00	2.0372891e-01	-4.5566185e-02	1.8067362e-01	-1.7344331e-01	-8.1111730e-01	-7.0709887e-01	1.4364329e+00	7.0870211e-01
1.2160313e+00	-2.6417603e-01	7.1774336e-01	-1.3385472e+00	3.3630681e-01	-1.0779632e+00	4.3433010e-01	-1.0119936e+00	6.1182829e-01
-1.3644043e+00	-9.3618643e-01	-6.0313687e-01	-1.7042871e-02	5.8340508e-01	2.3718397e-01	-1.2753574e+00	5.8530994e-03	1.1836339e+00
-1.0577164e+00	-1.3892899e+00	9.9819428e-01	-5.5459389e-01	3.7856678e-01	-3.3007493e-01	1.5531302e-01	9.8366929e-01	8.3992379e-01
1.2336019e+00	-1.4793771e+00	5.4646258e-01	4.5908092e-02	8.4682971e-01	4.8334857e-01	-3.1758686e-01	1.4692758e+00	7.2207454e-01
-1.3637862e+00	-1.3264361e+00	1.5212946e+00	-1.2544916e+00	1.2522321e+00	-5.1915663e-01	-1.1648984e-01	1.1993719e+00	5.4787674e-01
-9.4301469e-02	-6.7062074e-01	-1.0248677e+00	-1.0126041e+00	7.3575214e-01	-1.2627014e+00	-6.3246743e-01	1.3851203e+00	5.9972332e-01
-1.5620893e+00	9.1164501e-01	4.0110918e-01	-8.3017520e-01	4.7761603e-01	-7.6330342e-01	1.2694777e+00	5.1550008e-01	9.1439224e-01
2.5552692e-01	4.7039269e-01	-4.1583492e-01	-9.4157246e-01	5.2332446e-01	1.4238394e+00	1.5553557e+00	-5.0265915e-01	2.1496979e-01
8.3789302e-02	-1.4987466e+00	1.1062042e+00	-8.0608265e-01	-9.4523204e-01	9.5745790e-01	-3.2901642e-01	-4.4962141e-01	6.1561997e-01
8.1329518e-01	-1.4421780e-01	2.9403942e-02	-1.2836002e+00	5.1913093e-01	7.5736685e-01	-5.7587107e-01	-1.2566227e+00	8.2579812e-01
-1.7473783e-02	1.4409309e+00	9.6200149e-01	-1.5127973e-01	8.3070312e-01	-6.6875469e-01	5.8181791e-01	8.7019082e-01	8.2433557e-01
-1.5137594e+00	-8.1246919e-01	-1.4182918e+00	-1.0099216e+00	3.8964969e-01	8.5851962e-01	-1.1643000e+00	1.1833855e+00	1.1337026e+00
-1.1361541e+00	1.3335151e+00	1.1753669e+00	2.7228423e-01	-1.3783208e+00	-1.9575198e-01	5.9010852e-01	-2.6315228e-01	3.4095332e-01
-7.4206584e-01	2.6612553e-01	5.7717811e-02	-1.0194212e+00	6.6731760e-01	-7.5595585e-01	-5.4170899e-02	5.6216529e-01	7.8097023e-01
2.2232775e-01	-8.5622159e-01	-6.8887713e-01	8.3355260e-01	1.2114393e-01	-7.4920144e-01	6.1156970e-01	1.5429763e+00	1.0039834e+00
1.3087769e+00	1.1196424e+00	-1.1889343e+00	1.1569560e+00	3.1405699e-01	-3.2529426e-01	-6.3918563e-01	-1.0455105e+00	8.1830099e-01
-8.1919876e-01	-3.1012526e-01	1.2525699e+00	-1.4994788e+00	4.8009137e-01	-8.4933984e-01	1.4539332e+00	-9.6760084e-01	6.4726997e-01
1.3270013e+00	-3.7300261e-01	1.2996283e-01	1.1627627e-01	1.2856478e+00	5.4230287e-01	9.4683210e-01	1.5578506e+00	6.4783574e-01
7.4459137e-01	1.5641263e+00	8.7843475e-01	1.8463915e-01	8.7263071e-03	7.2404545e-01	1.2402513e+00	7.6194032e-01	4.0950641e-01
1.3836584e+00	-5.7707562e-01	1.5089596e+00	-6.6339424e-01	-9.9181165e-01	-1.4980822e+00	4.3686443e-01	7.9930046e-01	6.4451593e-01
1.0781391e+00	-8.1348444e-01	-9.9341722e-01	-1.5474350e-01	-8.7829881e-02	-1.5445283e+00	4.7839825e-01	3.9265790e-01	9.4079900e-01
-4.2338747e-01	-2.1714167e-02	1.2016619e+00	4.6470461e-01	3.9174415e-01	9.3524842e-02	1.1037148e+00	-1.0848644e+00	1.5098574e-01
-1.6587320e-01	-5.2525591e-01	-9.6692673e-01	2.9096604e-01	-7.3435218e-01	1.0756960e+00	-9.6959643e-01	4.8820133e-01	7.9643726e-01
-1.2381858e+00	-1.0074245e-01	3.2129132e-01	-1.1935943e+00	1.0604358e+00	-6.4282404e-01	-5.6607872e-01	-6.4018467e-01	8.2285094e-01
-2.7925653e-01	1.4008472e-01	-4.5455859e-01	1.4709594e+00	4.8985802e-01	-6.5698605e-03	-1.3425275e+00	3.7115537e-01	1.0106128e+00
7.4981232e-02	1.3509746e+00	5.8714076e-01	1.2212664e+00	-1.0705237e+00	-4.6390252e-01	-9.4141229e-01	-1.1947103e+00	6.1165172e-01
4.3091235e-01	1.5404664e+00	3.3230893e-01	-1.3419493e+00	-3.9096530e-01	6.2329479e-01	-1.2557633e+00	1.5639979e+00	3.9997031e-01
9.7278419e-01	7.5364686e-01	-6.3561811e-01	-6.4863960e-01	1.2580935e+00	-1.4960181e+00	-3.9391035e-01	4.0641909e-01	6.5115714e-01
7.3575866e-01	-3.5884759e-01	-1.4185570e+00	-3.5917014e-01	-1.2829212e+00	-1.4105241e+00	-1.1154496e+00	8.6325051e-01	1.1948948e+00
5.8717688e-01	7.0640388e-01	-1.4019506e-01	1.5685646e+00	-1.3069715e+00	-2.2104427e-01	-1.4778823e+00	7.7642308e-01	1.0340469e+00
9.3922095e-01	4.5144269e-01	-6.3851787e-02	-1.3803182e+00	-2.5417516e-01	1.4130330e+00	-1.3355174e+00	-8.3322409e-01	7.9983459e-01
-1.0164969e+00	4.5100406e-01	1.2676999e+00	-1.4874933e+00	6.4416137e-01	1.5465143e+00	6.3794464e-01	1.2227182e+00	5.7750337e-01
-2.8201337e-01	-6.3785922e-01	-4.9368506e-02	4.9394158e-01	4.9191800e-01	-1.2711775e+00	-3.2016077e-01	1.0679177e+00	8.1031506e-01
8.6466345e-01	-1.3858553e+00	-3.5602243e-01	-1.5532138e+00	-1.0060278e+00	1.2914484e+00	6.0611418e-01	5.7469024e-01	1.0551291e+00
-6.0895493e-01	-3.0189392e-01	1.0650944e+00	-1.3711689e+00	-2.5731422e-01	1.0955300e-01	-1.2239717e+00	1.5631057e+00	2.6795286e-01
6.0342684e-01	-2.5902649e-01	2.4702883e-01	1.4876124e+00	1.2930652e+00	2.8397353e-01	-1.4441565e-01	1.1198639e+00	7.1997022e-01
7.3385140e-01	7.8923575e-01	-1.3719097e+00	1.5066503e+00	-9.9086276e-01	6.6386068e-01	1.2573419e+00	2.7086765e-01	8.6795549e-01
-5.2320964e-02	8.8111124e-01	-1.5373955e+00	1.0355040e+00	1.5224401e-01	-1.4305820e+00	-1.3480117e+00	3.0475906e-01	9.3375119e-01
2.8749266e-01	-6.3115351e-01	5.9381636e-01	-7.0777674e-01	1.5086535e+00	-1.1827246e+00	1.1331642e+00	1.2895394e+00	7.2688344e-01
1.1961653e-01	1.3612821e+00	-5.6827522e-01	-1.5338434e+00	1.4571902e-01	-1.1953071e+00	7.5671247e-01	-5.5846607e-01	1.0372928e+00
-2.2434632e-01	-1.1518501e+00	-5.5996345e-01	6.0389207e-01	-1.3426642e+00	9.5911444e-01	8.9933927e-01	9.3966851e-01	5.6283038e-01
-6.7745321e-01	-6.5037565e-01	9.0582045e-01	-8.7178316e-01	-9.6983141e-02	3.2449531e-01	9.9285083e-01	2.2234873e-01	7.7946332e-01
-8.2428776e-01	-1.2626656e+00	-3.3714308e-02	3.2854731e-01	4.9093576e-01	-1.2107538e-02	-1.2962613e+00	-1.4802098e+00	1.0882925e+00
6.1917222e-01	-1.6207105e-01	-1.1497036e+00	-1.0252433e+00	1.3350735e+00	7.1213244e-01	6.8160092e-01	3.8534994e-01	1.1057568e+00
1.4726452e+00	-1.6727215e-01	8.6811274e-01	3.7205533e-01	1.3250166e+00	-6.5808787e-01	1.4198476e+00	-1.3875685e+00	3.6987776e-01
1.2814679e+00	3.8236937e-01	8.1449923e-01	1.3645860e+00	-1.1958432e+00	1.0648653e+00	-1.6001989e-01	-8.2136089e-01	3.6196002e-01
-1.1288843e+00	-1.2165714e+00	1.3693460e+00	9.7062414e-01	1.3731027e+00	-4.6169491e-01	-2.5101284e-01	-4.5432494e-01	5.8238669e-01
-1.0804992e+00	-1.4313561e+00	-7.1024452e-01	-1.0106782e+00	-4.0333091e-01	2.7520177e-02	3.8619503e-01	1.3724784e+00	9.8509686e-01
-1.5448716e+00	1.5150600e+00	9.7246832e-01	1.2217099e-01	7.7426867e-01	7.1749805e-01	2.4943496e-01	-1.4700369e+00	1.0232264e-01
6.0649723e-01	1.0043373e+00	-1.4315553e+00	-1.2737397e+00	6.5669097e-01	1.5571576e+00	1.3688075e+00	-1.4259515e+00	5.5872619e-01
-1.0691786e+00	1.2030214e-01	1.3073755e+00	-9.3022745e-01	5.9006285e-01	-1.4599983e+00	-3.3594015e-01	1.2429062e+00	5.4654438e-01
2.2479369e-01	-1.2675268e+00	7.6086120e-01	1.3739441e+00	-8.2173611e-01	7.8884603e-01	-7.0408767e-01	1.0742066e+00	5.6218362e-01
-1.2283673e+00	-1.8271483e-01	1.5120610e+00	1.1719585e+00	-4.7752702e-01	6.1424937e-01	7.7799367e-01	-5.4299115e-01	5.5352361e-01
1.3783978e+00	-1.5521114e+00	8.6570696e-01	-6.7933369e-01	9.7261387e-01	4.1574661e-01	4.3099525e-01	2.7443536e-01	6.0791667e-01
6.2730021e-01	1.4487974e+00	1.2213249e+00	-1.0136174e+00	1.0146807e+00	5.5127656e-01	-7.7544820e-01	5.7703336e-01	8.1906273e-01
-1.5037052e-01	-5.4638796e-01	-3.5944225e-01	9.8960229e-01	1.1742283e+00	7.4835981e-01	1.5100170e+00	1.0315838e-01	1.6522303e-01
-1.4367527e+00	-2.6714739e-01	1.3680318e-01	6.5419812e-01	-2.2963324e-01	-1.2537078e+00	1.0697531e+00	-3.7632391e-01	8.3954897e-01
-1.2213618e+00	-6.1033880e-01	-3.9474895e-01	-4.6644713e-01	-1.5700760e+00	-4.0575787e-01	6.0928585e-03	-8.5000208e-01	5.4594919e-01
-2.6111571e-01	-6.6414052e-01	4.9813495e-01	-1.3033093e+00	1.1107028e+00	8.2514448e-01	-1.2698847e+00	-1.1631557e+00	8.7929183e-01
2.3316665e-01	-1.3102478e-01	-1.9026092e-01	-1.5354021e+00	2.3915667e-01	1.2132262e+00	1.0283110e+00	9.7364494e-01	8.6077987e-01
1.2658281e+00	1.2293106e-01	4.2600574e-01	-4.6136713e-01	1.4091375e+00	-1.3848232e+00	9.2247151e-01	-5.0555011e-01	7.7357440e-01
-9.1862985e-02	-1.0655759e+00	1.8877962e-01	-7.4669189e-01	-1.0934110e+00	1.3360397e+00	2.1887022e-01	1.2273947e+00	7.3862216e-01
-1.4191928e+00	1.0856379e+00	-1.8949224e-01	1.0119777e+00	1.3582896e+00	-1.2850939e+00	-2.5322654e-01	1.1260613e+00	8.0672226e-01
-1.4027386e+00	-5.3613448e-02	7.7886556e-01	-2.7351006e-01	-1.1807229e+00	-1.2333999e-01	8.7966203e-01	7.5731269e-01	6.1095170e-01
-1.3168270e+00	5.5586710e-01	-6.2315527e-01	-7.3347828e-01	1.0308561e+00	4.7590784e-01	1.4475538e-01	1.5625683e+00	1.1663577e+00
6.0861513e-01	-6.3817057e-01	6.9931285e-01	4.0141971e-02	-2.8496877e-01	8.8118049e-02	1.3110395e+00	1.5119940e+00	5.6777519e-01
-3.1125384e-02	-3.3538072e-01	6.5294545e-01	-7.7631284e-01	1.4586598e+00	1.3099117e+00	-4.8933664e-01	-2.5933249e-01	7.6060850e-01
1.5216487e+00	-7.2647453e-01	4.7104512e-01	-4.5566903e-01	-1.2940115e+00	-5.9584836e-01	4.0869588e-01	-1.2120651e+00	4.3712501e-01
-1.3556976e+00	1.5132082e+00	4.1780577e-02	7.7348795e-01	7.9455420e-01	9.7398613e-01	1.4301093e+00	-1.0905778e+00	5.7656376e-01
7.6135362e-01	1.2969919e+00	-1.5105997e+00	1.0150255e-01	-8.3792930e-01	-1.0544445e+00	-4.7884985e-01	-1.2897514e+00	6.8698409e-01
3.6345448e-01	-9.6928851e-01	-1.4381317e+00	6.8521622e-02	6.8209885e-01	-3.2446933e-01	7.3099928e-01	1.3780671e-01	1.2418600e+00
1.3232490e+00	1.4675789e+00	7.3503084e-01	-1.3216005e+00	3.6373835e-01	4.4890029e-01	-8.6403185e-01	7.6363467e-01	4.6349529e-01
5.1092323e-01	9.5503642e-01	9.2103934e-01	-1.0802541e+00	-1.8892526e-01	-1.4384487e+00	-1.3419873e+00	1.0019605e+00	3.7904316e-01
1.1139834e+00	9.0032197e-01	1.2812453e+00	-5.6642556e-01	8.8339816e-01	-1.4513383e+00	-1.2872200e+00	1.0139556e+00	2.5544954e-01
-1.1726695e+00	-1.3405300e+00	1.4142585e+00	-8.8863832e-01	1.0597205e-01	-1.3174694e+00	-1.2998687e+00	1.5533559e+00	3.3738140e-01
1.2952858e+00	1.2144805e+00	1.5236283e-01	-2.1268755e-01	-2.1071716e-01	-7.6361222e-01	-2.5804549e-01	6.1840109e-01	7.8232033e-01
-1.3679828e+00	8.4595436e-01	3.6403848e-01	4.9279086e-01	-9.4838809e-01	-6.2459520e-01	1.5689263e+00	1.0787001e+00	5.6617533e-01
-1.5123790e+00	-8.9340808e-01	-1.4277383e+00	1.0977895e+00	8.8250287e-01	-1.5104139e+00	1.5576836e+00	-4.1875293e-01	1.2089222e+00
7.2231702e-02	1.3032006e+00	-5.1243964e-01	-2.6099514e-02	7.6687387e-01	-1.4575843e+00	1.0971672e+00	-8.1286784e-01	1.1556772e+00
1.3434571e+00	-2.9202170e-01	-1.4676134e+00	1.1684390e+00	-1.1054886e+00	5.1956155e-01	-1.0592685e+00	9.1664632e-01	8.7668983e-01
8.5757356e-01	-8.4103022e-01	-1.5353204e+00	-1.4133470e-01	-5.6734070e-01	-1.3565432e+00	2.7996891e-01	-2.9561261e-01	8.2722592e-01
-3.8822492e-01	-1.1695754e+00	9.1131524e-01	-3.6819264e-01	-5.6148402e-01	-8.8314895e-01	-6.6831310e-01	-1.5030864e+00	7.5917621e-01
1.9165702e-01	-1.0847160e-01	1.2110677e+00	7.2387159e-01	4.8238719e-01	9.4094951e-01	-1.1445189e+00	-8.2688612e-01	2.6348877e-01
1.0470620e+00	-9.5847625e-01	3.6616303e-02	-1.2786122e+00	-9.6915658e-01	-2.3908491e-01	4.2897159e-02	9.3092305e-01	4.5460957e-01
-1.2313739e+00	9.7674861e-01	-3.4194917e-01	-1.1408570e+00	5.4321658e-01	-2.0315676e-01	1.5478386e+00	8.9232539e-01	1.1092381e+00
1.1115448e+00	1.3922498e+00	-1.1667118e+00	-1.2439357e+00	3.7277105e-01	4.5557544e-01	-1.0059591e+00	-6.5058051e-01	1.0028621e+00
-1.3176559e+00	9.6098659e-01	8.9595426e-01	4.7179172e-01	8.2726393e-01	7.9510990e-01	8.9651692e-01	-1.5641996e+00	3.3578587e-01
-7.5576473e-01	3.7377588e-01	6.4958895e-01	2.3618581e-02	-8.6427528e-01	-9.2313662e-01	6.8146619e-01	-6.5604944e-01	6.5195208e-01
-6.7878767e-01	-1.1341362e+00	6.0706278e-01	1.1168086e+00	8.4985264e-01	1.1689745e+00	-8.4459031e-01	7.6733839e-01	6.6506660e-01
-1.2613957e+00	-1.3845521e+00	-9.8881531e-01	-8.1420029e-01	-1.3484334e+00	-5.6599378e-01	-1.3136517e+00	4.1842177e-01	1.2287791e+00
-8.1014661e-01	-3.9033877e-01	6.2729598e-03	5.1332130e-01	3.2993120e-01	8.5058223e-02	5.6905746e-01	1.5303571e+00	9.3115179e-01
-4.7153908e-01	-7.7819115e-01	-1.3845147e+00	5.7760750e-01	2.4271749e-01	1.4889368e-01	1.1406489e+00	4.9263121e-01	8.7044600e-01
1.0809109e+00	-6.0848656e-01	2.3862804e-01	3.2802105e-01	1.5655566e+00	-1.3933107e+00	8.8708030e-01	1.5561494e+00	7.7204484e-01
-9.6016509e-01	-9.4959097e-01	-1.1923835e+00	-4.4536479e-01	1.4710882e+00	5.8352514e-02	-8.4017967e-01	4.4401516e-01	1.3936948e+00
8.6673335e-01	-4.8476999e-01	-1.6945819e-01	1.1693360e+00	2.4522163e-01	5.5379993e-01	5.5921231e-01	1.2802280e+00	5.5014755e-01
-3.7765899e-01	-1.3795412e+00	1.3407078e+00	-7.7351859e-01	-3.2963864e-01	-8.2356208e-01	-9.6387897e-01	2.3451458e-02	6.6548862e-01
-1.2975596e+00	-9.9542042e-01	-1.3684993e+00	-6.1653197e-01	1.5327493e+00	2.4943693e-01	1.2794398e+00	1.4495768e+00	1.3516462e+00
8.5209346e-01	-1.0501212e+00	-7.6710199e-01	-1.0802660e+00	-1.4233964e-01	1.4019511e+00	-6.5703366e-01	-1.4286986e-02	1.0622256e+00
-1.3860525e+00	8.1198872e-02	4.1304159e-01	-7.6656589e-01	-1.5504013e+00	6.4718488e-01	-6.6493346e-02	-1.3603316e+00	6.6963891e-01
-4.7459072e-01	1.2582352e+00	-9.2972839e-01	-1.4383667e-03	-1.2254533e+00	1.0425572e+00	8.5331505e-01	1.4182323e+00	4.8115240e-01
5.7557037e-02	1.0992896e+00	3.3679164e-01	9.5811282e-01	8.8385174e-02	-1.5455979e+00	2.9551938e-01	9.6754021e-01	8.9524309e-01
-2.4942481e-01	5.4021776e-02	-6.9278472e-01	-8.0177734e-01	-4.8371296e-01	9.6580752e-01	-6.3761579e-02	5.6469830e-01	9.2303729e-01
-1.1980981e+00	2.3720179e-02	-8.9045611e-01	-1.1808471e+00	6.7807242e-01	-2.8227103e-01	-3.5776830e-01	1.3288774e-01	1.1698569e+00
1.1743152e+00	-3.1722316e-01	6.5159627e-01	-1.0558404e+00	-1.3350315e+00	-3.2422497e-01	-3.4061509e-03	-2.2810769e-01	4.2877095e-01
1.2310961e+00	-2.8688788e-01	-2.1341069e-01	1.3469569e+00	-6.2046857e-01	1.4141921e+00	-6.9851096e-01	-1.0629723e+00	2.9625985e-01
5.0335498e-01	6.2020181e-01	9.0535716e-01	-1.1886339e-02	-1.2693041e+00	-9.6291547e-01	2.5797150e-01	8.6205702e-01	5.7951392e-01
-4.2179242e-01	-7.2664628e-02	-1.5369713e+00	1.2882325e+00	1.3616773e+00	-1.3766243e+00	3.2921461e-01	-4.3302414e-01	1.2705250e+00
1.5094206e+00	8.0513798e-01	1.4390444e+00	-5.3330884e-01	-7.9195001e-01	9.0516204e-01	7.6533638e-01	1.2334316e+00	3.7121039e-01
4.7160661e-01	1.1145343e+00	-1.1018690e+00	-3.5784518e-01	6.2433083e-01	1.4668138e+00	1.3282699e+00	-1.0844707e+00	6.3353689e-01
5.4086350e-02	-1.3390640e+00	5.7674881e-01	-1.2956390e+00	2.0876827e-01	6.6273504e-01	7.5567460e-02	8.2137505e-01	9.5438243e-01
1.1090020e+00	7.2100548e-01	-1.5377177e+00	-1.4258884e+00	-3.9064200e-01	-1.4997948e+00	8.5886582e-01	6.9240342e-01	7.4114451e-01
-7.2277454e-02	8.1631371e-01	1.4609683e+00	-8.3818862e-01	4.0849686e-01	1.0878995e+00	-6.6036122e-01	7.6506936e-01	7.4054624e-01
1.0291934e+00	4.4947033e-01	-1.9410086e-01	-5.3467153e-01	1.2268259e+00	2.5741483e-01	5.5586040e-01	-1.8026143e-02	9.2652726e-01
4.4734606e-02	-1.2824795e+00	-1.2798986e+00	-1.2694627e+00	9.9067163e-01	3.9799764e-01	-7.5078024e-01	-1.3724931e+00	1.3523134e+00
1.0138846e+00	-1.6598322e-01	-7.7103552e-01	-1.3042460e+00	-2.2290366e-01	6.9553078e-01	1.4142674e+00	1.2237463e+00	8.5700346e-01
3.6055400e-01	5.4346224e-02	2.7566132e-01	-1.5702953e+00	-1.5633409e+00	-8.0458838e-02	3.0278771e-01	-5.0306122e-01	6.2264663e-01
-3.0119394e-01	-8.0647709e-01	-8.0929940e-01	5.6693506e-01	1.2097877e+00	-1.3868432e+00	-4.2705269e-01	-9.2407354e-01	1.1583052e+00
-1.0607108e+00	1.5117875e+00	1.2012143e+00	2.7014370e-02	5.1395790e-01	-1.1979806e+00	1.0646794e+00	1.1300244e+00	7.2866371e-01
1.1713642e+00	-5.8860098e-01	9.3355830e-01	-1.5004124e+00	-1.2892955e+00	7.2274173e-03	-4.4487307e-01	1.3930522e+00	2.5297595e-01
-1.2432301e+00	2.5862998e-01	1.2006899e+00	1.3299177e-01	1.5171193e+00	-1.0509108e+00	8.8046829e-03	-1.2614278e+00	5.8198567e-01
-2.3633808e-01	-1.1700842e+00	1.5462608e+00	1.5202435e+00	1.0589000e+00	-6.2446360e-01	3.2545103e-01	-1.3496158e+00	4.2160284e-01
-1.1610159e+00	7.6524928e-01	7.5059236e-01	1.5923066e-01	-1.8984829e-01	7.0130887e-01	3.4256759e-01	-6.9336584e-01	1.9718486e-01
-7.6170018e-01	-1.3572953e-01	-1.4303188e+00	-4.4719970e-01	1.0779287e+00	-3.5741546e-01	-1.0058354e+00	-1.2324771e+00	1.2781274e+00
9.5057125e-02	-4.0986958e-01	9.9398748e-02	-1.3956684e+00	-8.1633698e-01	-3.5646297e-01	-1.6629631e-01	1.4194514e+00	4.1462469e-01
-1.4455686e+00	8.3467726e-01	-7.3253498e-01	1.2733861e+00	-8.4048159e-01	-5.6027351e-02	1.0753407e+00	-5.3427893e-01	6.4340011e-01
1.4066504e+00	1.2094987e+00	1.8616958e-01	1.2711627e+00	-1.3735638e+00	8.2611048e-01	-3.3195897e-01	-9.5416394e-01	2.9149441e-01
1.0884226e+00	-1.2022290e+00	-7.4218237e-02	-1.5393126e+00	-1.0637583e+00	-1.4006461e+00	2.3422273e-01	1.1971026e+00	2.5168669e-01
-3.7616224e-01	8.6138605e-01	-1.7362322e-01	-2.1147340e-01	2.1882161e-01	-7.0590372e-01	1.6574446e-01	9.4397623e-01	9.9507744e-01
-1.2743086e+00	8.5637317e-01	4.5403478e-01	-1.0921578e+00	-1.0702367e+00	-1.4700317e+00	-9.2549343e-01	3.6557247e-01	5.7534177e-01
-1.0682971e+00	1.4279916e+00	3.4019736e-02	4.2947664e-01	1.2907011e+00	-1.3386176e+00	-7.4288137e-01	-7.7879062e-01	9.2751471e-01
-6.6693336e-01	-1.5137067e+00	-1.5270012e-04	-1.1660083e+00	1.1569182e-01	-1.2005508e+00	-9.1803756e-01	-1.2590285e+00	6.7087806e-01
5.3589455e-02	-2.5197151e-01	5.7516173e-01	1.5367274e-01	-2.1336704e-01	7.9179134e-01	-1.0957025e+00	1.2754429e+00	7.4384562e-01
-9.5912282e-01	-1.8244722e-02	6.2532529e-02	3.8862129e-01	-1.5026007e+00	-1.4944826e-01	5.4494350e-01	1.2816896e+00	5.6607052e-01
-4.6535575e-01	1.2370353e+00	-1.4493216e+00	1.8690479e-01	1.0533429e+00	1.4972289e+00	1.1228174e+00	-5.4312147e-01	4.2412974e-01
1.3316133e+00	-2.0737430e-01	1.1620901e+00	-2.8386585e-01	6.5868431e-01	-2.3026222e-01	-3.5541177e-01	1.2256470e+00	4.8688216e-01
-2.8139136e-01	-1.3136082e+00	-3.3378482e-02	1.1459587e+00	-4.6526817e-01	4.2509872e-01	-1.2379374e+00	2.6015218e-02	1.0198190e+00
-1.2476204e+00	1.2996680e+00	1.3529315e+00	-9.7741850e-01	-3.3798903e-01	6.5246699e-01	7.5350277e-01	5.5638631e-01	5.2695753e-01
1.3745715e+00	2.6560545e-02	-1.2743172e-01	-8.4731711e-02	-5.8204003e-01	-1.2872064e+00	3.6104706e-01	-1.3365597e+00	6.2300651e-01
-8.4890992e-01	2.9692906e-01	8.2127806e-01	-9.4439832e-01	5.7271001e-01	-1.0715268e+00	-1.4390066e+00	-1.1707967e+00	4.3510936e-01
1.4848228e+00	-1.5040921e+00	-9.3773220e-01	-1.1764767e+00	-3.0273111e-01	-1.5415793e+00	-1.4039954e+00	1.3561716e+00	9.2010627e-01
-1.3959656e+00	1.1198600e+00	9.0532924e-01	1.3979199e-01	1.3783831e+00	-6.0936849e-01	-4.4778571e-01	9.2124292e-01	7.2031876e-01
-5.8046487e-01	2.0549011e-01	1.1353734e+00	-4.2736887e-01	3.8076371e-01	-6.4084495e-02	1.3216097e+00	1.5610934e+00	6.0707014e-01
-1.2279510e+00	1.0619499e+00	1.8653320e-01	-1.1077242e+00	7.1420549e-02	4.9817184e-01	1.2339245e+00	-1.2846553e+00	4.0567559e-01
-1.0508610e+00	8.0400090e-01	-2.4601775e-01	-4.4196963e-01	2.7677986e-01	4.2973153e-01	9.1569493e-01	9.6481026e-01	9.8437670e-01
2.1388835e-01	8.5304905e-01	-4.8437990e-01	-1.4585559e+00	-8.5967901e-01	-2.3663556e-02	-5.7765696e-01	-1.3352245e+00	6.1269523e-01
8.3942057e-01	-1.0335164e+00	-1.1064588e+00	-1.0090190e-01	-4.4046777e-01	1.2688732e+00	-1.1591689e+00	-7.2112468e-01	9.4386889e-01
-7.5114849e-01	-4.4516572e-01	-1.1656264e+00	6.0178851e-01	-1.3494462e+00	8.2124163e-01	-1.1360828e+00	3.2188407e-01	7.8872421e-01
1.5082237e+00	1.3735045e+00	2.8813219e-01	1.4728098e+00	-9.8470448e-01	-1.5501272e+00	4.5703045e-01	8.2980322e-02	8.5885570e-01
-7.9589114e-01	6.7162675e-02	1.4434807e+00	9.0557362e-01	-1.8085944e-02	2.4028775e-01	1.1673867e-01	-2.1687000e-01	2.3006631e-01
3.5919514e-01	9.7131797e-01	1.2021819e+00	-1.0406078e+00	7.6402139e-01	1.5696674e+00	-1.4685226e+00	-6.8664269e-01	7.8563213e-01
-1.1484420e+00	1.2256685e+00	1.4885705e+00	-2.4902298e-01	1.2183939e+00	1.4468276e+00	-1.1073338e+00	-1.3338276e+00	2.7241537e-01
8.0283165e-02	3.8754635e-01	-1.2401654e+00	-7.2777661e-01	6.4562856e-01	9.0511764e-01	-1.6399432e-01	7.6418749e-01	1.1585393e+00
-1.5656938e+00	9.6993570e-01	1.0081291e+00	-1.5213025e+00	1.8112817e-02	7.2056579e-01	-1.0757792e+00	8.6836547e-01	5.7594742e-01
-6.3592845e-01	-1.5024977e-02	1.0164004e+00	8.9140803e-01	-3.1237794e-01	-2.9044910e-01	-7.5611753e-01	-1.2209411e+00	5.4464669e-01
-3.5126470e-01	-1.1973752e+00	-1.3400085e+00	-3.6062675e-01	-5.3468784e-01	4.5699661e-01	-3.2496864e-01	5.2537340e-01	9.3286365e-01
-6.5322064e-01	7.5756910e-01	5.5570146e-01	-9.2150612e-01	-1.5436107e+00	-4.5196475e-01	1.4817254e+00	-1.0662716e+00	5.9787191e-01
1.1870053e+00	-4.1118265e-01	-2.8044631e-01	2.9835131e-01	-1.9318340e-01	1.9953822e-01	-4.6988616e-02	-1.1823772e+00	5.7149998e-01
8.8541212e-01	7.5696137e-01	-1.0721619e+00	4.0864506e-01	-1.5682296e+00	1.5595568e+00	-1.1979197e+00	1.5010265e+00	5.5300012e-01
-6.0294900e-01	-1.2004706e+00	3.5109109e-01	5.7592313e-01	7.2724756e-01	1.1631671e+00	1.0309427e+00	7.6371790e-01	3.0115920e-01
1.0141227e+00	-1.0007227e+00	8.7691972e-01	2.9304612e-01	-1.0872996e+00	-7.8110208e-01	1.1712857e+00	-7.4086267e-01	3.7496332e-01
1.2196780e+00	9.4036278e-01	1.1785891e+00	-7.9109727e-01	4.0047874e-01	7.3306095e-01	5.7937872e-01	-1.5471729e+00	2.7264556e-01
2.3663955e-01	-6.7542265e-01	8.0598525e-01	-7.5166698e-01	1.5546542e+00	-7.7099010e-01	-1.3190721e+00	-3.7313252e-01	6.2068902e-01
-5.5398151e-02	-1.2541434e+00	-3.5337071e-01	-9.2288295e-01	4.4709717e-01	1.0390713e+00	5.7468532e-01	-6.1937031e-01	8.7387227e-01
-1.1653024e+00	-1.4424224e+00	-1.4913303e+00	-8.5082837e-01	-3.2748083e-01	-4.4241146e-01	1.4803696e+00	1.4812524e+00	1.0066019e+00
-5.4882658e-01	8.7738818e-01	-1.1613622e+00	6.5730611e-01	1.0009798e-01	5.4037657e-01	-8.4255427e-01	1.4288498e+00	9.3501042e-01
-4.1225667e-01	-3.7285509e-01	-2.9893499e-01	1.5039836e+00	-1.5469801e+00	-2.3528352e-01	1.4900909e+00	3.4391823e-01	3.1114706e-01
1.5556052e+00	9.0186416e-01	-7.9369375e-01	1.9782481e-01	-2.7400082e-01	8.5497153e-01	-8.1896954e-01	-2.9681697e-01	7.2066349e-01
7.2240461e-01	-5.5357406e-01	-4.0851821e-01	1.0365001e+00	4.4301017e-01	-1.3833565e-01	-1.1035810e+00	2.4640023e-01	1.0318416e+00
-8.0131559e-01	1.4782430e+00	1.5559402e+00	3.2535936e-01	9.7355438e-02	-2.2867712e-01	7.7197527e-02	6.2958399e-01	6.3637403e-01
2.9664252e-01	1.1155515e+00	6.9678211e-02	-1.1980704e+00	-5.1693280e-01	-1.2085410e+00	-1.8936848e-02	5.3401537e-01	5.6626225e-01
-3.6789656e-02	4.8669613e-02	-7.3236706e-01	-1.5015946e+00	1.5557157e+00	-1.5527497e+00	-9.7074102e-01	-3.3386033e-01	4.6752599e-01
5.7000019e-01	1.1760980e+00	-1.3319855e-01	-8.8725645e-01	-5.6211198e-01	1.4625037e-01	-9.5369664e-01	-3.0606550e-01	7.0073874e-01
1.2772350e+00	-2.2116753e-01	1.2875812e+00	1.0210969e+00	-6.4694258e-01	1.3045891e+00	-3.7364263e-01	-1.2557521e+00	4.4483479e-01
-1.4641594e-02	-6.5864072e-01	1.0871068e+00	-9.4487190e-01	-1.1181043e-01	1.0534135e+00	2.3195157e-01	-2.0571943e-01	4.9002337e-01
-1.0370499e+00	1.1979441e+00	-4.9867612e-01	2.8883831e-01	-5.2541985e-01	-1.2950730e+00	-3.0642875e-01	1.3671326e+00	9.7940440e-01
-1.4241767e-01	-6.2161397e-01	5.1964436e-01	7.4489079e-01	2.8550303e-01	-1.3383702e+00	-1.0775845e+00	-2.1139290e-01	8.4515566e-01
2.7987878e-01	1.4710985e+00	3.5169745e-02	1.3272388e-01	1.2374730e+00	-1.8492886e-01	3.1956760e-01	2.6075640e-01	1.1035963e+00
9.5840903e-01	4.1777505e-01	4.7848727e-01	1.5941633e-01	8.6457295e-01	-1.0642011e+00	-1.1508572e+00	1.0993182e-02	5.6371927e-01
1.0351084e+00	8.5671073e-02	-5.4171822e-01	-4.6834889e-01	1.0114729e+00	-9.4151685e-01	3.2972572e-01	-5.9155619e-01	1.1230141e+00
-1.0727172e+00	1.0242862e+00	-3.2259705e-01	1.2913566e+00	6.6664561e-01	1.2845467e-01	-6.9266158e-02	8.5584725e-01	9.0132413e-01
4.4222394e-01	-7.4984249e-01	5.0036912e-01	-1.4338633e+00	1.3933548e+00	6.6352608e-01	1.3745535e+00	-1.1280184e+00	6.0488854e-01
-5.5052697e-01	1.4670110e+00	-3.3980127e-01	2.1619332e-01	6.8167496e-01	-7.7114326e-01	-1.1514070e+00	9.0704486e-01	7.5387899e-01
-7.1633920e-01	8.3407953e-01	3.7542952e-01	-1.2615905e+00	-4.7730990e-01	-1.5349940e+00	5.1279035e-01	-1.4462325e+00	7.2271086e-01
-9.2983848e-01	5.8826469e-01	1.5259513e+00	-9.4279075e-01	1.4801154e+00	1.1497463e-01	1.0787330e+00	-3.2730479e-01	3.8831953e-01
-1.5135475e+00	3.7263173e-01	-1.2988735e+00	7.0916113e-01	1.1695282e+00	2.9914649e-01	1.3401795e-01	-8.2909180e-02	1.2993852e+00
-7.1724046e-01	-1.5142058e+00	7.5972357e-01	-3.3137969e-01	-6.8468895e-01	1.2068294e+00	-8.2280936e-02	1.4125487e+00	7.1019546e-01
-3.6935105e-01	7.8473834e-01	1.2414538e+00	5.4538669e-01	8.6660068e-02	1.0596403e+00	-5.9491971e-01	-3.1038132e-01	3.6148529e-01
1.0392861e-01	6.9139713e-01	-1.3436513e+00	-8.5319973e-01	-1.2032219e+00	-3.1481736e-01	8.7389522e-01	-1.5350171e+00	7.8858326e-01
2.6721684e-03	-4.3961208e-01	-9.8023527e-01	-1.4989718e+00	-1.1866614e-01	-6.9336929e-01	6.1130440e-01	-2.7436470e-01	9.4448235e-01
9.2883646e-01	4.6569199e-01	-3.0238970e-01	-7.8690015e-01	4.8945005e-01	-1.2904539e+00	1.1850747e+00	6.1055609e-01	9.9098250e-01
3.8053794e-01	1.1780538e+00	8.3317682e-01	6.7422931e-01	1.4973826e+00	8.9761895e-01	-1.4644928e-01	1.1745434e+00	7.1470988e-01
-5.8141634e-01	1.2330293e+00	1.1243616e+00	4.7228634e-02	-7.8938075e-01	3.5369306e-01	-1.5060776e+00	-1.2175086e+00	6.0803864e-01
-1.5112739e+00	-1.5632256e+00	4.6490911e-01	-1.0512824e+00	-1.7650986e-01	6.2602237e-01	-8.3343371e-01	-1.4747073e+00	9.4641798e-01
-2.0417863e-01	6.3844781e-03	5.8650080e-01	-5.8538614e-01	-9.3778801e-01	3.6412244e-01	8.4127557e-01	-1.3804843e+00	4.2137299e-01
-1.0110095e+00	4.8977247e-01	-9.9875935e-01	8.8332184e-01	-3.2748646e-02	-1.6601419e-02	-9.8998149e-01	-1.1380796e+00	9.3525244e-01
8.3737363e-01	6.3318114e-01	-6.1881045e-01	-1.1767701e+00	-6.2778589e-01	5.8169823e-01	-7.4415462e-01	1.4543355e+00	5.5171257e-01
-5.9649813e-01	1.3011329e+00	1.4659713e+00	1.4921982e+00	1.4122014e+00	-3.4240628e-02	-3.2641435e-01	1.4262754e+00	4.7574274e-01
-5.2198893e-01	-4.8501068e-01	-9.3222420e-01	4.0383471e-02	1.3573830e-01	-5.7078401e-01	-8.2524402e-01	1.0595395e+00	9.7491352e-01
1.4004116e+00	8.5849822e-01	-7.6948296e-01	1.4098466e-01	5.5734399e-01	1.2570689e+00	2.5537522e-01	1.1325653e+00	8.9321749e-01
-9.4260052e-02	-5.5553741e-01	1.2368672e+00	7.6830948e-01	-9.4886384e-01	3.4581320e-01	6.7570725e-01	1.1455475e-01	3.4195057e-01
-8.6599923e-01	-1.0393054e-01	1.0887124e-01	1.0317057e+00	-8.3023765e-01	1.3607409e-01	-2.4571263e-01	-4.7468018e-01	6.3026655e-01
1.4971846e-01	-3.5053595e-02	1.3920152e+00	1.4285994e+00	1.1503653e+00	-8.2154462e-02	1.5020948e+00	-1.4459788e+00	3.9439782e-01
-9.7553907e-02	1.4736432e+00	1.5870831e-01	-7.2215681e-01	8.2844522e-01	1.5307230e+00	-1.3155387e-01	7.9583729e-01	9.8571456e-01
3.2284509e-01	-7.9588581e-01	1.9837596e-01	-1.3170822e+00	1.4013875e-01	3.5992545e-01	6.5533154e-01	-1.2642523e+00	7.8533759e-01
5.2683346e-01	4.4876654e-01	8.7492471e-01	-5.3899127e-01	-8.8258577e-01	-1.4404078e+00	-2.6662674e-01	1.4438097e+00	5.1032142e-01
1.4818251e+00	-5.4474664e-01	-9.3565281e-01	1.5268972e+00	9.8143228e-01	1.7931011e-01	-1.2845586e+00	4.4778715e-01	1.1677207e+00
-1.5127379e+00	-9.5584942e-01	1.2961228e+00	-1.1086380e+00	-1.5706479e+00	8.7763450e-01	-5.5190845e-01	-1.2974158e+00	5.1611307e-01
3.2293175e-01	1.1437118e+00	1.3172534e-01	-9.3449005e-02	9.2299153e-01	6.2560497e-01	1.1977387e+00	1.2696172e-01	5.4495719e-01
-1.1582588e+00	-1.0410497e+00	-9.1502637e-01	1.9890776e-01	-4.6589753e-01	-3.6783211e-01	-9.3059797e-01	7.0422660e-01	1.1092820e+00
-1.5482598e+00	-1.3932814e+00	-7.5223558e-01	3.8815819e-01	-1.4909717e+00	4.9999625e-01	1.4296671e+00	1.5569850e+00	6.9748352e-01
2.0909420e-01	5.5169597e-01	-1.0546091e+00	-1.3132051e+00	-1.4191188e+00	-3.2341786e-01	1.5144521e+00	-1.2191373e+00	9.6411829e-01
-1.1959816e+00	1.5142448e+00	5.1179046e-02	-1.3493025e+00	-1.5763957e-01	-7.2865786e-01	2.1286116e-01	-5.7344834e-01	8.2729329e-01
-9.5213951e-01	-1.2993033e-01	-6.3016505e-01	1.4300107e+00	-1.0856323e+00	-6.2453506e-01	-7.1646535e-01	4.6000784e-01	1.2579107e+00
6.6430012e-01	-3.3208115e-01	-8.7522498e-01	1.0066185e+00	1.4842194e-01	-4.9972981e-01	9.1446856e-02	-1.0768649e-01	8.9064388e-01
-3.2819570e-01	1.3222133e+00	-9.6938886e-01	7.5991462e-01	1.0295969e-01	-1.4817136e+00	7.0850627e-01	-3.2952604e-01	8.9639978e-01
6.5158232e-01	-1.1872738e+00	-2.1908281e-01	1.3109333e+00	-5.7409972e-01	2.4427682e-01	1.2287726e+00	2.8363837e-01	2.3818039e-01
-4.4794860e-01	8.8618233e-01	-1.7822663e-01	8.6675348e-01	-1.0629149e+00	-5.0101572e-01	-8.4931274e-01	1.3139562e+00	9.6436831e-01
-1.4161576e+00	-2.2442007e-01	-1.5171250e+00	-3.9412001e-02	-1.3140921e+00	-1.1028686e+00	9.9775735e-01	1.4078774e+00	1.0439649e+00
-6.5471291e-01	1.2246217e+00	-1.1532905e+00	4.7854448e-01	-5.4992522e-01	-5.1576553e-01	-5.1378113e-01	-2.8092040e-01	9.1631074e-01
1.2392127e+00	-1.4982023e+00	2.7288473e-01	4.1986510e-01	-2.7662374e-02	-8.1715646e-01	1.1188278e+00	3.8452305e-01	8.6395347e-01
-1.3113431e+00	-4.2103367e-01	-3.5169277e-01	6.5555822e-01	3.4187937e-02	1.0944831e+00	-1.4344351e+00	4.2286169e-01	1.1706480e+00
-1.4705592e+00	-1.4462106e+00	-1.5645393e+00	4.0155260e-01	-3.1480007e-01	9.5213030e-01	3.1653760e-02	7.5381631e-01	8.7037407e-01
-7.7931863e-01	4.1356647e-02	-8.1338426e-02	7.5350248e-01	-4.0272324e-01	-8.1910153e-01	1.0755940e+00	-6.5249744e-01	4.6029450e-01
-7.0840890e-01	7.8918255e-01	-4.6212005e-01	3.5622796e-01	1.5627206e+00	-1.8047260e-01	7.8493795e-01	7.7552088e-01	1.0578673e+00
4.0778031e-01	-1.3102970e-02	-8.3464853e-01	-7.5227481e-01	9.3064861e-01	-1.5661268e+00	9.0453998e-01	-2.8849710e-01	1.1816590e+00
-1.3915332e+00	-3.1013609e-01	-7.2665396e-01	1.4277007e+00	-5.7870189e-01	1.5122241e+00	4.3654616e-01	-1.2932688e+00	1.0418086e+00
-1.4820319e+00	-5.5497295e-01	-1.5024198e+00	-1.1925635e-01	1.2812218e-01	4.6574179e-01	1.4124767e+00	7.1022788e-01	9.7212369e-01
1.1780111e+00	-4.1761794e-02	9.5230963e-01	-5.3316101e-03	1.3585672e+00	-1.1266867e+00	-1.5196321e+00	-1.2521730e+00	5.1892487e-01
5.1508119e-01	-1.3153171e+00	-9.4656606e-01	1.4978166e+00	3.4282277e-01	1.2963551e+00	6.9081238e-01	2.5698323e-01	7.2100170e-01
-1.2597911e+00	8.5273348e-01	8.9423766e-02	2.2220476e-01	1.4130380e-01	8.9584419e-01	-8.4285535e-01	-5.7269925e-01	8.8571507e-01
1.0261200e+00	-5.4148244e-02	1.2639536e+00	-7.5824986e-01	-1.5106579e-01	-1.2003322e+00	-4.2864588e-01	4.8352126e-01	5.9829499e-01
-1.3444532e+00	9.9232807e-01	-1.8102409e-01	1.5360174e+00	-5.5594653e-01	1.3244703e+00	-5.7931482e-01	-7.5837027e-01	2.0302710e-01
1.2510305e+00	-6.5744713e-01	-1.4102065e+00	1.3777958e+00	-6.9681953e-01	-9.5374455e-01	-7.4847510e-01	-4.8778489e-01	1.0506309e+00
-6.0971182e-01	-7.3255403e-01	-1.1653510e+00	-6.5753149e-02	4.1157998e-01	-1.1789739e+00	-6.8401445e-01	1.3561821e+00	6.7180051e-01
4.4869120e-01	-1.3405495e-01	-1.3662793e+00	7.2743625e-01	-3.6231949e-01	-9.8922584e-01	-1.1433098e+00	1.0976565e+00	8.9158062e-01
1.3305773e+00	-5.3965391e-01	-1.1563190e+00	-1.0576269e+00	-1.0971448e+00	-6.1029357e-01	1.5139529e+00	8.8134679e-01	6.5066796e-01
1.1564722e+00	-1.8529823e-01	-3.6122820e-01	-4.0403694e-01	1.4364371e+00	9.6048513e-02	1.2469648e+00	1.8619676e-01	9.8559383e-01
-2.0622542e-01	-9.8895581e-01	1.5362780e+00	1.4744076e+00	-9.4073973e-01	-4.9125924e-01	1.7222987e-01	3.8266231e-01	4.4055292e-01
-8.5394963e-01	7.8643100e-01	-5.2593062e-01	-5.1418153e-01	6.2320759e-01	-4.8857484e-01	1.2605667e+00	5.6521426e-01	1.1698255e+00
-1.5362049e+00	8.6553597e-01	1.1258098e+00	6.7242975e-01	1.8012442e-01	6.4589721e-01	-5.5651987e-01	-6.2008508e-01	3.4458708e-01
-1.3868397e+00	1.4891089e+00	-3.2693233e-01	1.2180419e+00	-1.1442707e+00	1.3917745e+00	-9.0815921e-01	-1.1071594e+00	3.8530476e-01
-1.1397088e+00	1.5262870e+00	-1.0620162e-01	1.0121592e+00	1.0719930e+00	-7.4437776e-01	1.5669317e+00	-3.7461297e-01	5.1715164e-01
-7.9526761e-01	1.2009586e+00	-5.0594827e-01	-3.6453626e-01	-4.8319369e-02	-9.3499417e-01	-5.5033774e-01	-3.6857161e-01	9.3945828e-01
1.4140255e+00	-2.2108006e-01	8.1878730e-01	-6.5521269e-01	1.5688692e+00	-2.0049602e-01	-6.7759382e-01	6.3762776e-01	5.5239244e-01
-6.2191056e-01	8.1153015e-01	1.1822644e+00	-8.7742281e-01	5.9673958e-01	1.1922993e+00	-4.5924592e-02	6.3722642e-01	6.5065069e-01
-3.7200788e-01	-1.4079938e+00	-2.5589873e-01	-2.0919922e-01	1.4384259e+00	-1.2449734e+00	9.7717188e-01	1.7504332e-01	1.2122632e+00
-5.6704892e-01	1.4663995e+00	-4.9555533e-02	-5.6903979e-01	1.0681950e+00	-1.2600898e+00	-9.1857204e-01	1.4224116e+00	3.3357279e-01
1.2009515e+00	-1.8053424e-02	-3.5778856e-01	-8.4378224e-01	-1.0492577e+00	-8.5376887e-01	-6.5400440e-01	-1.0484896e+00	4.4367667e-01
-3.4072169e-01	1.3105963e+00	-3.4398893e-01	-2.9880438e-01	-1.1142301e+00	1.5017975e+00	5.8079835e-01	-7.7137727e-01	7.6595108e-01
6.1399590e-01	1.4855249e+00	-8.9153469e-01	1.4014572e+00	1.6904616e-01	1.1550322e+00	5.4950635e-01	8.1518796e-01	7.1171959e-01
-7.0269930e-01	9.7961880e-01	1.3734787e+00	-1.3707082e+00	1.1589935e+00	7.2517334e-01	-7.2910073e-01	3.7846262e-01	7.3890820e-01
-1.0203028e+00	-6.3397922e-01	-3.6704841e-01	-1.9340675e-01	1.3287773e+00	-1.3912263e+00	1.3569404e+00	-9.0390643e-01	1.0773998e+00
-1.4172473e+00	9.9354340e-01	1.1053427e+00	9.6119349e-01	-8.2195389e-01	5.3392292e-01	1.2765123e+00	7.8663320e-01	2.9261951e-01
-1.2008713e-01	9.1896501e-01	1.2571160e+00	7.0948623e-01	-9.9614203e-01	1.2538172e+00	4.0579263e-01	1.1222720e+00	2.1243484e-01
-1.4019208e+00	9.7537623e-01	1.1373510e+00	-1.1505865e+00	-6.1191034e-01	-8.9734669e-01	-2.4090190e-01	-9.6175795e-02	6.7492786e-01
-1.3788429e-01	3.1781544e-01	-1.1330863e+00	-1.4037093e+00	1.1972265e+00	1.0804533e+00	6.7462547e-01	1.4936370e+00	1.1088233e+00
1.0740708e+00	8.1655886e-01	5.5287899e-01	1.2188087e+00	-1.1551772e-01	7.7339700e-01	4.2244658e-01	-9.1024253e-01	3.0567933e-01
3.1611660e-01	1.4280639e+00	-5.9394546e-01	1.3332277e+00	-2.0707188e-03	-1.4270139e+00	6.0193295e-02	1.1100722e+00	9.3659261e-01
5.3848966e-01	-2.9818617e-01	1.5401402e+00	-1.4226466e+00	-2.4505251e-01	-9.0435264e-01	7.5880378e-02	-9.3538908e-01	5.8952010e-01
-5.3279711e-01	-7.7463063e-01	1.5537985e+00	2.4087587e-01	3.0505839e-02	-4.2959211e-01	-1.6510368e-01	-5.5464268e-01	5.3061783e-01
-1.1818998e+00	-4.5708326e-01	-1.3684590e+00	-1.1121067e+00	6.3204010e-01	-7.7473823e-01	-8.7121291e-01	-7.7405258e-01	1.0821121e+00
1.0062186e-01	-1.0042651e+00	-9.0509658e-02	1.2995721e+00	9.7323750e-01	8.7604235e-01	4.8805703e-01	-1.6654800e-01	4.0459906e-01
9.7468140e-01	1.0929810e+00	-6.6498297e-01	1.5561630e+00	-1.0703113e+00	-1.0009077e+00	7.6144837e-02	-1.3231719e-02	5.8105366e-01
1.2061945e+00	8.3930794e-01	1.4178461e+00	6.7245543e-01	3.7979965e-02	9.7277294e-01	1.1380663e+00	6.6758062e-01	3.8433483e-01
-1.8684782e-01	4.9759363e-01	7.5880263e-01	-1.4919459e+00	5.8596973e-01	5.4665802e-01	1.4650374e+00	1.4001693e+00	7.7329463e-01
1.2413431e+00	1.3654085e-01	1.4712672e+00	1.0571879e+00	-4.9977296e-01	-1.4772535e+00	-9.1900009e-01	-1.0256952e+00	5.4684091e-01
-6.3535879e-02	1.4794727e+00	1.1136441e-01	-6.9180912e-01	9.3457934e-01	-1.9342688e-01	-1.5650280e+00	-9.4087169e-01	8.4130081e-01
2.9398675e-01	-2.0756743e-01	-6.8751077e-01	-2.0151712e-01	-4.8838165e-01	6.2289732e-01	1.1297197e+00	1.5469307e+00	6.5063336e-01
-6.8986766e-01	-1.4179033e+00	-2.1567646e-01	-2.6140194e-01	7.5122490e-01	1.2484985e+00	-5.8671014e-01	-5.5702412e-01	1.0477450e+00
1.0127572e+00	1.4218706e+00	5.2364050e-01	-1.4358127e+00	-2.2398169e-01	8.1721897e-01	6.2193909e-01	4.1733017e-02	9.2009490e-01
2.6112341e-01	-7.1677036e-01	1.2248357e+00	-1.1307785e+00	-8.3223833e-01	-4.3918456e-02	8.5145953e-01	8.3166104e-01	6.1730605e-01
-1.0383764e-01	1.2483105e+00	-1.0422848e+00	-1.4996214e+00	-1.0591769e+00	1.3678273e-01	5.2579601e-01	7.8142700e-01	5.7719062e-01
1.5263114e+00	7.9917606e-01	-1.6025020e-01	8.6078278e-01	-1.3218217e+00	-7.3847890e-01	-2.4658969e-01	-1.5552674e+00	3.0280125e-01
-1.5292153e+00	1.4434971e+00	-9.8024236e-01	1.4197807e-01	1.4853123e+00	8.1770328e-01	-6.7221415e-01	-1.3276776e+00	9.5243824e-01
-1.5256507e-01	1.4778051e+00	-4.2139206e-01	-1.3849451e+00	5.4850986e-01	-1.3287876e+00	-7.3611106e-01	4.5535748e-01	4.7134907e-01
-6.2148758e-01	3.9055585e-02	-1.1865362e+00	-7.1178436e-01	1.3722993e+00	6.4954799e-01	-2.2679305e-01	2.7339689e-01	1.3970091e+00
4.5389461e-01	-1.8565269e-01	7.1671031e-01	2.2507327e-01	-1.3392531e+00	-8.1331443e-02	-9.5884969e-01	-1.1685925e+00	4.5541221e-01
8.1980826e-01	-6.6326461e-01	8.8387659e-01	3.2881379e-01	6.8422709e-01	-3.4476504e-01	9.8364134e-01	7.0350205e-01	6.5627668e-01
-5.0793821e-01	-1.1175849e+00	-1.2778116e+00	3.1195553e-01	-1.5660675e+00	-1.3691503e+00	9.9946231e-01	-1.1957434e+00	5.1652363e-01
-1.2103335e+00	3.3282284e-01	-2.5251117e-01	-2.8155185e-01	-6.3247794e-01	8.5734597e-01	-1.3283881e-01	-9.1613996e-02	7.8297725e-01
-2.6337665e-01	-1.4230377e+00	3.3641442e-01	-8.0347193e-01	1.0928673e+00	-1.0717713e+00	1.0505517e+00	-3.7603314e-01	1.0338823e+00
-6.7289108e-02	-4.9614354e-02	-7.4957301e-01	-1.3875149e+00	-1.0708028e+00	6.3194311e-01	8.7137721e-01	8.9546824e-01	8.7712075e-01
4.5320379e-02	-1.3463933e+00	-2.8695441e-01	8.0081978e-02	1.2008471e+00	-6.5692270e-01	-8.6825405e-01	-1.2356558e+00	1.1623576e+00
1.4341915e+00	6.0064930e-02	-4.9810073e-01	1.3361526e+00	1.0455124e+00	-1.3432895e+00	-4.7913358e-02	1.4017208e+00	6.3169895e-01
-9.8435692e-01	1.0600389e+00	7.6545538e-01	6.1198566e-01	9.9944135e-01	-1.1824246e+00	-1.0320824e+00	-8.1995462e-02	7.6335268e-01
-4.5990279e-01	1.0269067e-01	1.8665453e-01	6.8673404e-02	-4.8519889e-01	7.0410411e-01	-1.4766101e+00	1.0614464e+00	7.6843838e-01
-1.2682947e+00	1.1877828e+00	-1.3483181e+00	1.2294019e+00	8.3679181e-01	-5.0168200e-01	1.1968229e+00	-1.3755534e+00	6.9504555e-01
-5.2320726e-01	1.3850579e+00	-8.7492265e-01	3.0246520e-01	-9.5034559e-01	2.6538008e-01	-6.1455712e-01	5.3901476e-02	7.6207905e-01
-2.2650277e-01	-5.3336802e-01	9.7022250e-01	4.3572271e-01	-6.0134621e-01	-8.1856190e-01	6.9506510e-01	1.1434283e+00	6.6993985e-01
7.7826097e-01	-1.3524738e+00	-1.4779263e+00	1.3909431e-01	-3.2210953e-01	-5.3554973e-01	1.5177258e+00	4.7781223e-01	9.0683348e-01
-1.3597527e+00	1.5376260e+00	1.0654822e+00	4.1306501e-01	-7.3080141e-01	-3.2138166e-01	-1.3151645e+00	6.7927733e-01	7.4935992e-01
-1.4181465e+00	1.3831445e-01	4.8175515e-01	-5.3620923e-01	1.0479896e+00	-1.0637541e+00	2.7682184e-01	6.6343856e-02	8.8580831e-01
4.7592890e-01	-1.2751858e-01	9.7445866e-01	1.1608290e+00	-1.3486759e+00	2.8781347e-01	-1.5407370e-01	-2.2419657e-01	2.8945070e-01
4.4207630e-01	-6.3851699e-01	6.0415487e-01	7.6234360e-01	-6.0447903e-01	-7.7168010e-01	-8.4433793e-01	-1.3021460e+00	6.5792007e-01
1.0981734e-01	1.2551585e-01	4.0350491e-01	1.2940863e+00	4.3151147e-01	-1.1329306e+00	-2.1364624e-01	-8.3301805e-01	7.4689182e-01
-1.5564898e+00	1.5361945e+00	-9.9155047e-01	4.6195335e-01	-1.5241920e+00	2.8576016e-02	8.8105238e-02	1.5440942e+00	8.0597921e-01
1.1727120e-01	1.2119259e+00	1.1603138e+00	1.1744733e+00	-5.4870415e-01	-3.8656876e-01	1.0946010e+00	-1.1053316e+00	1.8312788e-01
1.1985480e+00	-1.2473514e+00	1.5292574e+00	7.4539516e-01	-1.4962149e+00	-2.4760721e-01	-2.0758134e-01	-1.0715067e+00	5.2510151e-01
1.0418962e-01	-3.8679463e-01	8.5971937e-01	-8.1505384e-01	1.5646415e+00	1.0759406e+00	1.4898153e+00	-1.2040700e+00	5.7628788e-01
1.2477917e+00	-9.0206686e-01	1.1188796e+00	-1.2659441e+00	-1.3428830e+00	3.2691809e-01	8.3300787e-01	1.3359617e+00	5.0434507e-01
1.5035399e+00	2.8850291e-01	-5.6488189e-01	1.2851117e+00	-6.3295676e-01	-1.3315540e-01	1.4263465e+00	5.4619429e-01	3.5653543e-01
-9.7677427e-01	1.3909786e+00	-7.6996741e-02	4.2202608e-01	-6.7160478e-01	-1.1288347e+00	-8.8814482e-01	1.5373049e-01	9.5473533e-01
1.3181068e+00	-1.5547820e+00	2.5194620e-01	-7.2393544e-01	8.0788341e-02	-2.4642546e-01	-1.3432716e+00	1.3592281e+00	2.5725780e-01
-1.0906283e+00	5.4704383e-01	-4.0709036e-01	2.0547643e-01	6.4161953e-01	-1.0535668e+00	-8.8059139e-01	-1.1145793e+00	1.0482351e+00
1.0030397e+00	-1.2760397e+00	4.2110642e-01	8.3203439e-01	-1.3882162e+00	-1.2805167e+00	-5.6515537e-02	5.8226802e-01	7.7917105e-01
3.0267034e-01	1.2544295e+00	-4.7268203e-01	7.7303445e-01	8.5971155e-01	1.4077323e+00	-1.0956464e+00	1.1742576e-01	9.9086793e-01
7.4185459e-01	-3.1739918e-02	7.2100287e-01	-1.2372657e+00	9.8733770e-01	4.2269748e-01	1.4875209e+00	6.5452605e-01	7.4478450e-01
-6.3120980e-01	6.1795628e-01	7.7240086e-01	-5.2264201e-01	2.9224962e-01	1.1356115e+00	-3.1258445e-02	-1.2382005e+00	4.2071889e-01
4.1526248e-01	-1.1419191e-01	6.8040999e-01	-1.5122901e-01	1.5300104e+00	1.0470095e+00	-7.1471048e-01	-5.2571926e-01	7.0480579e-01
-1.3024473e+00	2.8975106e-01	2.5342804e-01	-1.5755494e-01	9.4873326e-01	1.0287653e+00	1.3113312e+00	1.5364867e+00	6.2511467e-01
3.8516625e-01	3.7753632e-01	-6.3450657e-01	3.3669178e-01	-1.3643970e+00	-8.6673157e-01	1.2712794e+00	-1.5892068e-01	2.3842084e-01
-1.3332757e+00	-7.6430379e-01	1.5551290e+00	7.7035834e-01	-9.3495217e-01	4.0770463e-01	4.2189052e-01	-6.2604268e-01	4.7418794e-01
6.1633182e-01	3.1853968e-01	-9.9844971e-01	9.0933847e-01	5.0530598e-01	4.7816032e-01	1.3935215e-01	-7.0556578e-01	6.8863348e-01
8.5797668e-01	4.2248218e-01	1.4436635e+00	-5.9662020e-01	9.5274168e-01	2.4653318e-01	-1.5366150e+00	1.0682058e+00	5.3968927e-01
1.0385628e-01	6.5864731e-01	1.1317844e+00	5.6804241e-01	3.1703709e-02	-2.7754269e-01	1.1450462e+00	-8.6792660e-01	2.0830933e-01
-1.2129468e+00	-1.0872522e+00	-4.4314157e-01	-2.1135946e-01	-1.2265157e+00	6.0516824e-01	-6.0463024e-01	-8.2775591e-01	6.9518054e-01
-2.0145701e-01	1.1969094e+00	8.3578456e-01	8.2282125e-01	1.0824486e+00	-1.4143302e+00	1.0317399e+00	-1.1213593e+00	6.7355710e-01
7.4893792e-01	8.3847643e-01	9.7036261e-01	-1.3403231e-01	-2.4994598e-01	-1.3574338e+00	-1.1387823e+00	-2.7130161e-01	5.8133088e-01
-9.6209075e-01	-9.1133836e-01	8.7699267e-01	-1.5906765e-01	-5.3277886e-01	-1.4435468e-01	-9.3105923e-01	-1.3152627e+00	7.9294741e-01
-8.1801810e-02	1.5419970e+00	-7.3693500e-01	4.5365889e-02	-8.7527202e-01	-8.5950273e-01	-3.9413630e-02	-1.3748768e+00	6.1979925e-01
1.1745682e+00	1.3452816e+00	-1.5082892e+00	-9.4251598e-01	1.3816249e+00	-6.1936885e-01	4.5117885e-01	-1.1405152e+00	1.1683718e+00
-8.0011524e-01	1.0538308e-01	-3.0625757e-01	-9.5592128e-01	1.4584021e+00	1.5058151e+00	-8.4166721e-01	1.3587696e+00	1.0162213e+00
-1.5202870e+00	-6.8489469e-01	-1.3421722e+00	-6.4162129e-02	6.5891401e-01	-4.3646975e-01	6.9098406e-01	6.0344362e-01	1.3820534e+00
-8.9055425e-01	-2.2957717e-01	-1.2522774e+00	-8.0662509e-01	2.5365929e-01	-1.2821014e-01	-1.0988621e+00	1.0157936e+00	7.7484366e-01
-9.9784034e-01	-6.2779370e-01	-1.4965559e+00	-9.7563224e-01	1.1040962e-01	3.0474082e-01	8.4795371e-01	1.0278109e+00	1.1584408e+00
-8.8105437e-01	1.2809545e+00	-1.0235573e+00	-1.4789694e+00	-1.0267205e+00	9.8301001e-01	1.2937597e+00	-1.2009009e+00	1.0825620e+00
-1.5546338e+00	-3.3145771e-01	4.3333863e-01	-7.5808523e-01	6.7689684e-01	-1.8651652e-01	1.2562778e+00	1.1910968e+00	1.0854435e+00
-1.0471952e-01	-7.6592587e-01	9.1057365e-01	1.1613034e+00	8.9813576e-01	5.2638632e-01	-3.8320717e-01	5.3564077e-01	4.1287953e-01
-7.2903712e-01	1.3306626e+00	1.3135886e+00	-6.8964514e-01	-3.8492080e-01	2.5001142e-01	-2.9801202e-01	-1.2900964e+00	3.9098720e-01
-7.1549964e-01	-5.5224850e-01	1.5126028e+00	-1.5306069e+00	-8.2458470e-01	-1.5089517e+00	-9.8925701e-01	6.2277421e-01	2.9086535e-01
6.1420052e-01	-1.3759044e+00	5.4792871e-01	-1.5492893e+00	-1.2298597e+00	1.1262130e+00	-1.1342482e+00	-8.2059353e-01	7.2787717e-01
-4.0527131e-01	4.3838082e-01	1.0298111e+00	-1.3858363e+00	1.4283923e+00	1.6679622e-01	-1.2469653e-01	-1.2364283e-01	7.6976622e-01
-4.2205695e-01	8.3173322e-01	1.0018552e+00	1.7297941e-02	-1.0617765e+00	1.0434094e+00	-3.3234484e-01	-1.4723337e+00	1.7848799e-01
2.0511957e-01	-1.1471530e+00	-7.5662246e-01	-1.4416298e+00	-1.0320519e+00	2.1077672e-01	3.1951600e-02	8.1363336e-01	7.2912412e-01
1.1175500e+00	-2.4592052e-01	6.1339216e-01	-1.5094904e+00	-9.6357220e-01	-1.1921095e+00	-2.0179639e-01	-6.1699334e-01	2.5467947e-01
-9.1969625e-01	1.1496897e+00	-1.4250853e+00	1.4969031e+00	1.5220379e-01	1.2933078e+00	1.3281238e+00	5.9022977e-01	8.5526518e-01
-6.9899878e-01	-1.1020606e+00	9.4438890e-02	5.7608541e-01	8.3262671e-01	-5.5936189e-02	7.6116288e-01	-1.1578482e+00	5.6345766e-01
1.4839541e+00	4.9851628e-01	7.3012586e-01	-1.2105673e-01	1.3034431e+00	-7.8332680e-01	2.9928586e-01	-9.2916081e-01	7.8712157e-01
-2.8723139e-01	-6.4456189e-02	1.6440040e-01	1.1515898e+00	6.4177385e-01	1.0412137e+00	4.0769000e-01	4.5135585e-01	4.1099731e-01
1.1300024e+00	5.3429883e-01	-1.5240659e+00	-5.8203223e-01	1.2055927e+00	1.0083144e+00	2.3218933e-01	-1.0084959e+00	5.8773543e-01
1.0234073e+00	1.2886491e+00	1.5705213e+00	7.0378472e-01	-8.7626226e-01	9.8974362e-01	5.4802371e-01	-8.9893870e-01	3.9830109e-01
1.8651045e-01	1.8541777e-01	9.0401300e-02	4.1339051e-01	4.4654281e-01	-1.1214188e-01	-5.1518293e-01	-5.4367440e-01	9.5333399e-01
-6.2834971e-01	-1.4348855e-01	-1.1561957e+00	-1.3486053e+00	-2.1977616e-01	1.8707819e-01	-4.5015481e-01	1.3573980e+00	7.8453966e-01
1.3609739e+00	1.1310656e+00	-1.4303112e+00	5.8136472e-01	7.3501013e-01	-5.1115467e-01	-7.9682838e-01	-4.5761531e-01	1.0252533e+00
-4.6988480e-02	4.2080095e-02	2.2698206e-01	6.4363854e-01	5.7300662e-01	1.2794475e+00	3.1483587e-01	-5.2175223e-01	1.0694003e-01
-1.1956331e+00	3.8180416e-01	9.9402991e-01	1.1294782e+00	1.5407686e+00	-5.2743419e-01	1.0043982e+00	-9.0462812e-01	2.9955694e-01
-1.3786139e+00	-1.2912797e+00	-3.2899862e-01	-1.5041798e+00	-4.4976050e-01	9.8808057e-01	1.1428619e+00	1.2236638e+00	1.1269213e+00
-1.1180087e+00	-4.1584070e-01	-2.7674242e-01	-3.5311382e-01	-4.5276251e-01	2.1134092e-01	3.8203269e-01	1.2524244e+00	9.5909818e-01
-5.0616008e-01	1.0090354e+00	1.4888917e+00	-3.1542391e-01	-6.4204265e-01	-1.1343911e+00	-5.9192371e-01	8.2640124e-01	7.1479456e-01
4.0048832e-01	5.4041936e-01	1.0170643e+00	-1.4627661e+00	5.6000246e-01	6.1516298e-01	9.6222005e-01	3.4450455e-01	6.9454787e-01
-1.4258673e+00	4.8374643e-01	3.9377462e-01	1.3942959e+00	-2.5025022e-01	6.2800280e-02	-8.8654715e-01	1.3268551e-01	8.5493873e-01
-4.8265678e-01	-1.1554040e-01	-1.1656338e+00	7.9128883e-01	6.3704229e-01	-9.0830182e-02	3.7598427e-01	-4.8548303e-01	1.1165181e+00
-4.2026557e-01	-3.8324708e-01	1.6376981e-01	8.2965363e-01	2.2200915e-01	2.3115734e-01	1.4247377e+00	-7.9710151e-01	2.1424098e-01
-1.1030873e+00	-9.6865423e-01	4.4403823e-01	-1.5411674e+00	-9.0434323e-01	-1.0886560e+00	3.4693539e-01	-1.1339399e+00	7.7595883e-01
-1.0500672e+00	-4.3856533e-01	-1.4735744e+00	3.0605116e-02	-2.7147142e-01	-4.0511852e-01	1.4708888e-01	-1.2274928e+00	8.8429359e-01
9.8775589e-01	-7.9108632e-01	-1.1892203e+00	-8.4101163e-01	-1.0275876e+00	-9.9568197e-01	-3.1056905e-01	3.6739791e-01	7.9966761e-01
1.0376534e+00	-5.6765590e-01	-4.1294264e-01	-8.5712044e-01	-1.3298991e+00	8.3723012e-01	-1.5487081e+00	-1.5144831e+00	4.8612001e-01
8.6000911e-01	4.2425228e-01	-5.4873254e-01	-1.4209922e+00	8.1806941e-01	1.3318225e-01	-1.0420204e+00	-7.3305391e-01	8.5802461e-01
-2.9465056e-01	-1.0071813e+00	1.1682373e+00	-2.2826188e-01	-1.4584937e+00	-1.5614342e+00	1.1414938e+00	8.8930402e-01	7.0214339e-01
-1.0418747e+00	-7.9540619e-01	-3.9042412e-01	-5.1275435e-01	9.4415518e-01	-1.3003718e+00	-6.2065607e-01	-1.1652485e+00	1.1354147e+00
4.4982529e-01	-9.1502769e-01	9.2885757e-01	-4.7368958e-01	2.3154314e-01	7.1205747e-01	-1.2790119e+00	3.5699282e-01	7.6188482e-01
1.5416587e+00	-7.7433953e-01	7.3533217e-01	-5.0506949e-01	-8.8773714e-01	1.2234075e+00	1.5651560e+00	-4.6361234e-01	4.5357034e-01
-1.1988568e+00	1.2938209e+00	-2.9778423e-01	-1.1950804e-01	-7.7452728e-01	8.5812056e-02	1.0209529e+00	-7.8276080e-01	6.2614416e-01
9.8850129e-01	-8.5732134e-01	-3.0239135e-01	-1.0938548e+00	1.2799578e+00	2.5219277e-01	-2.2423963e-01	1.1292729e+00	8.6586437e-01
9.9918233e-01	1.4857962e+00	8.0554074e-01	1.8223987e-01	-1.3760515e+00	5.9532825e-01	1.1157943e+00	1.3280355e+00	2.6965782e-01
1.4447129e+00	-7.4248148e-01	-1.5411977e+00	-1.4742575e-01	1.1080683e+00	-2.9069361e-01	9.8853822e-01	-7.2317026e-01	1.1229057e+00
-7.9114081e-02	-4.8026962e-01	-4.7876924e-01	9.3209422e-01	-5.7553525e-02	-5.1095065e-01	-1.5216065e+00	4.9949893e-01	1.0193810e+00
-7.7666553e-01	-1.1399150e+00	-1.0557614e+00	-1.4150709e+00	3.0843424e-01	1.5666718e+00	-1.0760607e+00	7.4289506e-01	1.2664456e+00
-1.0012889e-01	-1.1187581e+00	-4.6586623e-01	-1.2398163e+00	2.2637692e-01	1.3645759e+00	7.9669944e-01	1.1480760e+00	1.0659633e+00
1.0273529e+00	-5.3527939e-01	-9.6477970e-01	5.9085033e-01	2.4811394e-01	8.0023440e-01	6.5961073e-01	5.1266996e-02	5.6655092e-01
5.2653895e-01	1.0806538e+00	-1.2928140e+00	-1.5288077e-01	1.1575090e+00	3.8144995e-01	-6.0285466e-01	8.4802127e-01	1.1105931e+00
-3.2639196e-01	1.0005792e+00	-1.0702713e+00	3.5564319e-01	1.5115676e+00	-9.6131032e-01	-5.4188649e-01	-7.1241770e-01	1.1941999e+00
-4.4886218e-01	-2.1132166e-01	7.0970402e-01	-1.1557640e+00	-1.1425725e+00	4.6854292e-01	-9.0561044e-03	-9.9461470e-01	6.1437852e-01
-1.0626458e+00	1.4581562e+00	-6.3179933e-01	-4.5742602e-01	1.3402518e+00	-1.1719895e+00	-1.4094994e+00	-7.4785573e-02	6.2676065e-01
6.7093295e-02	-3.3369428e-01	-6.8110691e-02	-4.8192501e-01	3.9333820e-01	1.5764112e-01	1.2945677e+00	-2.8405677e-01	7.0533530e-01
-1.9475762e-01	-6.5692991e-01	-1.1966641e+00	-6.8779160e-01	9.2412395e-01	1.1116702e+00	-8.7122974e-01	1.0787166e+00	1.2293384e+00
2.4819187e-01	-1.4644556e+00	1.4284631e-01	1.3476147e+00	-2.8291942e-01	7.8939890e-01	2.0518056e-01	-1.4067097e-01	3.1818649e-01
-6.7434471e-01	1.2736098e+00	6.4117643e-01	-1.5231100e+00	1.3445784e+00	4.8149029e-01	-9.9907338e-01	1.3623203e+00	4.6619400e-01
1.1547977e+00	-1.2531954e+00	5.8942371e-01	-1.2120197e+00	8.5354095e-01	-3.3542369e-01	3.8649731e-01	5.9053024e-01	7.4713393e-01
-7.4719980e-02	-1.2174943e+00	1.0026555e+00	-3.2780712e-01	9.5061830e-01	-1.4487746e+00	-9.5325936e-01	7.5051279e-01	5.8493912e-01
8.1836239e-01	-1.2329899e+00	1.2774025e-01	8.9931530e-01	-1.0985026e+00	9.3012139e-01	6.9242825e-01	3.7387424e-01	6.8149518e-02
3.2412800e-01	-9.1554357e-01	1.2226079e+00	5.8991475e-01	6.0681811e-01	-1.4780544e-02	1.1824873e+00	5.1896392e-01	3.0849054e-01
9.7559958e-02	-1.9916061e-02	-7.8682253e-01	-1.6928432e-01	1.1822976e+00	-2.3078023e-01	3.4963227e-01	1.1653154e+00	1.1028627e+00
-2.2115216e-01	1.4211821e+00	-1.1627631e+00	1.1213606e+00	3.0208465e-01	1.1435756e+00	1.4912411e+00	7.6649763e-01	7.3120913e-01
-4.0025316e-01	2.7868621e-01	1.2882799e+00	2.9402024e-01	3.2292464e-01	-1.8855596e-01	-3.3671524e-01	-1.1458526e+00	4.2047081e-01
-9.0498907e-01	-2.3554821e-01	2.6314641e-01	-1.2699142e-01	-1.2777038e+00	8.0704641e-01	-1.1647135e+00	-3.8090906e-01	6.6930011e-01
1.4403105e+00	-4.5198494e-01	-6.6078481e-01	-1.2033727e+00	1.5601111e+00	-1.3681366e+00	-7.5509601e-02	6.2727989e-01	5.4612087e-01
1.3273278e+00	-1.3981520e-01	-2.8027039e-01	4.8933187e-01	1.0552658e+00	-9.5483405e-01	1.1356048e-01	-4.9191220e-01	1.0369897e+00
-5.0642810e-02	3.7291920e-02	-1.2571114e+00	-4.8877660e-01	1.5612659e+00	-6.4066002e-01	-1.4774264e+00	1.1034917e+00	6.8543397e-01
2.1789795e-01	-1.5532327e+00	-1.0608600e+00	3.9648815e-01	-1.5278029e+00	-1.3348974e+00	4.2590422e-02	1.5635639e+00	1.2697686e+00
-8.8620491e-01	1.4521908e+00	-1.3360204e+00	4.5832146e-01	-1.5465240e+00	-1.5077779e+00	-4.6590339e-01	-6.0349449e-01	1.1308161e+00
-1.5510894e-01	-6.3052440e-02	-1.5325616e+00	-1.7644432e-01	1.1083115e+00	-1.1370245e+00	1.5521489e+00	1.2708507e+00	1.2467565e+00
6.0599132e-01	-1.0056347e+00	1.5588308e-01	1.6379519e-01	8.8784722e-01	3.3740957e-01	-8.1857667e-01	-4.9992689e-01	9.0122560e-01
-1.4721754e-01	6.5827900e-02	-1.6137183e-01	8.7052892e-01	-5.1687374e-01	2.6785183e-01	-7.8380734e-01	1.4891001e+00	8.2240335e-01
1.2898839e+00	5.2889919e-01	-9.8193857e-01	5.8251363e-01	-5.9333829e-01	-1.1657568e-01	-7.5192713e-01	1.3775094e+00	8.2541536e-01
-1.0515965e+00	-1.4984962e+00	-6.5535172e-01	1.1038872e+00	-8.2150775e-01	1.0664183e+00	9.8789999e-01	1.4046719e+00	6.6942796e-01
4.1731538e-01	9.2286531e-01	-7.2431629e-02	-1.2134571e+00	2.1902603e-01	5.0671506e-01	3.1802921e-01	-7.4825377e-01	8.5982477e-01
-1.3568554e+00	5.5440432e-01	-1.5620338e+00	6.4664394e-01	-7.7617721e-01	-4.9764505e-01	1.2678539e+00	-1.0565238e-01	5.8278723e-01
1.5205693e-01	-9.0480653e-02	1.1884169e+00	1.3757270e+00	-1.3176043e+00	-1.0006603e+00	-6.0170096e-01	-6.9973294e-01	5.9185147e-01
1.5060760e+00	-1.7749129e-01	-5.2329920e-01	-2.7760055e-01	1.1093633e-01	-1.1513783e+00	-1.2374392e-03	-1.4302635e+00	9.1254177e-01
8.0774002e-01	1.4169838e+00	1.3697803e+00	-3.6743016e-01	1.5424190e+00	9.9595468e-01	1.1935071e+00	1.0281827e+00	5.0409540e-01
8.6464502e-01	-1.1678634e+00	3.0706983e-01	9.7238306e-01	-9.8616901e-01	6.0458749e-01	2.0537988e-01	-1.2353560e+00	2.3418930e-01
-9.1872987e-01	3.9107968e-01	-7.1415525e-01	2.7704237e-01	5.0036971e-01	1.3912408e+00	-7.9070046e-01	1.5803950e-01	1.0343033e+00
-1.6498415e-01	6.6433552e-01	1.2183051e+00	4.1086372e-01	-3.2979426e-01	-2.9043524e-01	-3.6572899e-01	1.5240149e+00	6.7396609e-01
1.1376895e+00	2.6686527e-01	-8.4627746e-01	1.6588071e-01	-1.0826472e+00	6.8993635e-01	1.2896444e+00	7.1354132e-01	6.9675948e-01
1.4147648e+00	-9.8974703e-01	-1.3953178e+00	1.3644414e+00	5.3694590e-02	1.4181156e-01	1.2050555e+00	1.0297742e+00	8.3814995e-01
-7.6313181e-01	5.4730614e-02	8.8224361e-01	-1.4594827e+00	8.0789009e-01	-1.0419486e+00	-4.8078826e-01	3.8078089e-01	5.6843880e-01
1.1664312e+00	-6.2921122e-01	-4.4893760e-01	2.9726391e-02	2.4533686e-01	-7.9239706e-01	-4.3193683e-01	3.6012421e-01	7.6782535e-01
6.7063158e-01	-5.5204613e-01	8.1122756e-01	9.8218018e-02	-1.5344925e+00	-6.0615510e-01	6.5831063e-01	-1.2415256e+00	3.3854071e-01
-7.2950256e-01	-1.1162670e+00	-2.1048734e-01	1.4140852e+00	-8.8133835e-01	5.3626597e-01	-4.6255527e-01	1.3838366e-01	6.4157861e-01
8.8656976e-01	4.9130789e-01	-2.2746907e-01	3.8083184e-01	-4.4229897e-02	-2.0723653e-01	1.2753692e+00	1.0356065e+00	7.0547038e-01
4.0610760e-03	1.3062243e+00	2.4567239e-01	1.2164249e+00	1.1855854e+00	1.0018974e+00	4.2884918e-02	1.0158642e+00	6.7185807e-01
-8.6053488e-01	2.6247766e-01	9.6317600e-01	-1.0324599e+00	-9.8891975e-01	-4.7451999e-02	1.3420923e+00	-9.2574978e-01	4.5814962e-01
8.8288871e-01	6.6593597e-01	-5.2798723e-01	-1.5374798e+00	1.3924825e+00	4.3879316e-01	-8.9277526e-02	1.2319022e+00	1.0047269e+00
9.6845655e-01	-1.1087312e+00	1.1177908e+00	-8.2376235e-01	-1.4123074e+00	1.4787142e+00	1.1939122e+00	1.4850341e+00	3.5590223e-01
2.5775474e-01	1.4831397e+00	-1.3536777e-02	2.4934774e-02	1.2239170e+00	-3.9013586e-01	7.3077683e-01	-9.8575587e-01	8.9893535e-01
-1.7243519e-01	-1.4088120e+00	-1.3179352e+00	1.2469199e+00	-7.7618070e-01	-5.0945650e-01	-1.4611048e+00	1.1607999e+00	1.2664585e+00
-1.5697966e+00	2.8020353e-01	8.3358891e-01	-5.8127143e-01	-1.3762941e+00	1.5461082e+00	1.0410625e+00	2.7381925e-01	4.1388308e-01
-4.7570032e-01	1.3335050e-01	-1.3744791e+00	9.2424212e-01	1.7156813e-01	1.3280776e+00	-1.5337628e+00	-3.5309040e-01	9.4191099e-01
2.5794355e-01	1.2662979e+00	-7.3999700e-01	-1.4383775e+00	-4.3648301e-01	-1.5893014e-02	-1.1839750e+00	7.8218194e-02	6.7223892e-01
-1.4069718e-01	1.5205861e+00	4.3569956e-01	-2.5452863e-01	-3.5114286e-01	-7.8510999e-02	-2.1977832e-01	1.4274620e+00	7.2355787e-01
9.2176573e-01	-3.6583866e-01	-2.4992539e-01	9.8649815e-01	1.3944805e+00	-6.5442188e-02	6.9871933e-01	-9.8951841e-01	4.1852957e-01
9.2326276e-01	-5.5356448e-01	-1.8661477e-01	-1.2516173e+00	7.5224011e-01	-3.2943102e-01	1.0247364e-01	7.5551267e-01	9.3075091e-01
9.5106235e-01	-1.5024506e+00	-1.1249681e+00	1.7280858e-01	1.1306083e+00	-1.2608148e+00	6.8168266e-01	-4.1607906e-01	1.4585206e+00
8.1505671e-02	4.3472314e-01	-1.2342813e+00	1.5622154e+00	-1.3602708e+00	-4.7159243e-01	-3.4795631e-01	1.4452673e-01	6.7894493e-01
1.3141720e-01	-9.5278076e-01	-6.3010556e-01	-1.2774024e+00	-7.0171031e-01	1.8428718e-01	1.5439005e+00	6.0961822e-01	1.0511091e+00
1.8922054e-01	-6.8855247e-01	1.2464071e-01	3.4281196e-01	-1.0634122e-01	-2.9578176e-01	-1.2193386e+00	1.1197099e+00	7.7217417e-01
9.3792387e-01	1.1259525e+00	-6.0592974e-01	-4.0346907e-02	2.8933094e-01	-1.2044699e+00	-8.1555498e-01	8.2506873e-01	5.4979755e-01
-8.2540020e-01	-1.0704554e+00	1.1821692e+00	4.7354942e-01	-4.0029808e-01	8.9669397e-01	-2.6382849e-01	-5.9853143e-02	4.5455400e-01
7.7205614e-01	7.5802215e-01	1.2865874e+00	1.2909318e+00	1.4817008e+00	5.1562094e-01	-1.3782737e+00	-6.4213337e-01	7.0962370e-01
1.1698032e+00	9.1998812e-01	9.2867768e-02	8.5143697e-01	-4.5943997e-01	1.5286423e+00	1.4575523e+00	-9.6477673e-01	7.4663524e-01
7.9543561e-01	-6.7875686e-01	-5.4296949e-01	1.4658663e-01	2.2711898e-01	-5.4078441e-02	-1.0584898e+00	-1.2427789e+00	1.0165801e+00
1.4096251e+00	-7.4363708e-01	6.3844980e-01	6.7293396e-01	1.5355931e-01	-9.7608327e-01	8.0117773e-01	1.0641232e+00	6.6617680e-01
8.1878141e-01	-1.0528575e+00	-1.2546614e+00	2.6748580e-01	-1.5178014e+00	3.6533370e-01	5.2796930e-01	-3.6839423e-01	5.1991563e-01
1.0833007e+00	1.2151028e+00	-7.2372421e-01	1.4777786e-02	4.4027490e-02	1.4915319e+00	-1.4192307e+00	4.7724089e-01	9.2826634e-01
1.5046584e+00	-1.2612154e+00	6.1391591e-01	1.8443324e-01	-1.4458374e+00	1.4086076e+00	1.1027815e+00	5.0154844e-01	4.8608158e-01
-1.0279161e+00	-9.2094097e-01	1.0944863e+00	-9.8250820e-01	2.9816922e-02	-5.7504985e-01	-9.4793889e-01	6.3156747e-01	4.5726491e-01
-5.6758723e-01	3.7207607e-01	1.0069107e+00	-8.0428891e-01	-1.5218164e+00	-1.3238879e+00	-9.9260810e-01	-6.8718133e-01	5.7297641e-01
-1.5633371e+00	-1.4284330e+00	-6.1115329e-01	5.8939569e-01	-1.4621012e+00	1.3165418e+00	-9.0735597e-01	-9.6198199e-01	5.1302834e-01
1.2738867e+00	3.7756215e-01	1.3546913e+00	5.3171103e-01	3.0827056e-03	8.8056999e-01	-6.4112373e-01	-1.3954789e+00	3.9383704e-01
2.5953191e-01	-3.3004353e-01	1.1748937e+00	-1.3638694e+00	1.5455505e+00	-3.0312238e-01	2.9630789e-01	1.3169506e+00	5.2689455e-01
1.4221345e+00	1.0109913e+00	1.5292043e+00	-1.4928005e+00	1.3794036e+00	1.0855079e+00	6.2242778e-01	1.4683448e+00	5.5317183e-01
5.7744990e-01	-1.1445423e+00	-3.3560522e-02	-7.3852639e-01	-1.3166676e+00	9.0308115e-01	-3.5981990e-01	1.2613034e+00	4.1563049e-01
8.2072938e-01	-3.5096623e-01	1.4349834e+00	1.9526926e-02	1.4708345e-01	1.0507692e+00	7.2835418e-02	-7.4133434e-01	3.6338773e-01
-7.3460436e-01	1.2216525e+00	-2.4117428e-01	1.4634082e+00	-4.0188615e-01	1.3858124e+00	-1.0762659e+00	-4.9869863e-02	3.3064409e-01
-3.6348702e-02	-1.1368261e+00	-7.6168459e-01	-2.7699012e-02	-7.6385516e-02	-4.1917677e-01	4.8960866e-01	6.4245423e-01	1.1099719e+00
-1.4436600e+00	5.3063673e-01	3.5718195e-01	-5.8157551e-01	1.1000223e+00	1.4882912e+00	1.0215903e+00	7.4316071e-02	5.7779971e-01
-1.0738076e+00	-5.7006926e-01	-4.2656348e-01	-1.0448002e+00	-1.9867813e-01	3.5027013e-01	1.0643664e+00	-1.3236716e+00	9.3778391e-01
9.6497407e-01	7.0356837e-01	-1.3794530e-01	1.5460411e+00	3.2961366e-01	-3.5463975e-01	5.7823588e-01	-1.3301626e+00	4.5024025e-01
1.4178361e+00	-8.1227332e-02	4.8732684e-02	1.9957133e-01	1.1889666e+00	-8.2896949e-01	1.4642844e+00	-4.6904513e-01	8.1082162e-01
5.9104373e-01	1.4050368e+00	-9.0546389e-01	-1.0256015e+00	-7.0842916e-01	4.7322759e-01	-1.0084811e+00	-9.8560835e-01	6.0731393e-01
-4.4012516e-02	-8.9863777e-01	-2.5679252e-01	6.3438515e-01	6.7295874e-02	-9.7645241e-01	-6.5009100e-01	4.9853781e-01	1.0204495e+00
-1.4440800e+00	1.3724561e+00	6.3649906e-01	-4.5423006e-01	6.8395718e-02	4.4443923e-01	3.7980869e-01	2.9732082e-01	6.3842527e-01
1.2921635e+00	1.2967966e+00	5.1665078e-01	-1.7443345e-01	-2.9608619e-01	-1.0171693e+00	-2.7162480e-01	-1.2029556e+00	7.5026586e-01
-4.3829243e-01	-1.1085466e+00	-1.2438579e-02	-5.9710334e-01	-3.7869724e-02	9.8341137e-01	-4.6394500e-01	1.2154838e+00	9.7773442e-01
6.5392763e-01	1.4429600e+00	1.4315149e+00	-1.2689130e+00	1.2668527e+00	2.7588786e-01	-9.0694777e-02	-1.1402051e+00	6.8968284e-01
1.2706514e+00	-1.2672563e+00	1.1546006e+00	-1.4894743e+00	1.4205772e+00	-1.4343126e-01	-6.3468731e-01	2.8732208e-01	3.9747017e-01
-7.0916036e-01	1.2218531e+00	-2.4564649e-01	-1.3841397e+00	-4.6250901e-01	-1.0475915e+00	-1.4826275e+00	3.9426042e-01	5.0147790e-01
3.4436176e-01	-9.0654591e-01	-5.2783390e-01	2.5782239e-01	-1.0887250e+00	-1.3844077e+00	5.9205983e-01	7.1589825e-01	9.8376580e-01
8.7446283e-01	4.0726062e-01	5.5336145e-01	9.6470119e-01	-1.5658095e+00	-1.1046767e+00	1.3256741e+00	-1.9799561e-01	2.1537367e-01
7.2631118e-01	-7.0113492e-01	1.2316014e+00	-2.6759871e-02	5.6140170e-01	5.1126139e-01	4.2869866e-01	-7.6564262e-01	3.7254409e-01
-1.1171278e+00	1.3946980e-01	-4.2868688e-01	-5.0540032e-01	1.2756555e+00	5.1434094e-01	1.4663741e+00	-1.9193665e-01	9.4105840e-01
-1.4087547e+00	4.4081573e-01	-1.2685204e+00	6.0336583e-01	-1.4274910e+00	-1.1348712e+00	-4.4432282e-01	5.3643989e-01	1.2647207e+00
1.2435571e+00	9.1448919e-01	-1.1749131e+00	-2.9160963e-01	5.0266600e-01	-1.1706509e+00	-1.6794102e-01	-4.2562476e-01	9.0632686e-01
-5.5127405e-01	1.1484964e+00	1.2864350e+00	-1.9849954e-01	5.6476356e-01	6.6524073e-01	-1.4344941e+00	-6.8851244e-02	8.0295161e-01
-7.0621724e-01	8.3337957e-01	6.7300842e-01	1.8956046e-01	1.2297994e+00	-2.2726114e-01	-9.5980308e-01	-1.0767600e+00	8.8063573e-01
-4.5604466e-01	1.3904162e+00	1.5188792e+00	3.6763857e-01	6.9973792e-01	5.9874136e-01	6.6791244e-01	-1.5315053e+00	1.8572813e-01
7.4354896e-01	1.5588428e+00	-7.7921158e-01	-6.1129864e-01	1.5138848e+00	5.2474209e-01	6.9379346e-01	-9.4149600e-01	8.9950572e-01
-4.2827927e-01	-1.4114758e+00	1.0907150e+00	-1.0883238e+00	1.0284560e-01	8.8968644e-01	-1.0052960e+00	4.7889695e-01	8.6114618e-01
-7.0100548e-01	-5.0746516e-01	4.5355897e-01	-1.1064294e+00	6.5007973e-01	-1.0210033e+00	-5.2503694e-01	6.0636868e-02	5.6898847e-01
-8.2671548e-01	4.5719101e-01	1.4617900e+00	-6.7122574e-01	-5.6927815e-01	-6.2377512e-01	4.3786201e-01	1.2478240e+00	6.7550788e-01
6.5721348e-01	-3.2640174e-01	1.0504161e+00	1.6826153e-01	1.4334001e+00	-2.9368054e-01	1.5368100e+00	-1.0941333e+00	3.1012595e-01
-5.2832796e-02	-6.1322804e-01	-1.4073213e+00	5.3813247e-01	1.4233471e+00	-4.4680986e-01	-1.0082960e+00	-1.3570662e+00	1.2529686e+00
1.1099245e+00	1.0418640e+00	2.0262211e-01	-2.5283822e-01	-1.0337334e+00	-1.1269133e+00	-6.8033748e-01	-2.4974399e-01	6.5748193e-01
-2.7602827e-01	-6.2901727e-01	-1.6655740e-02	1.1229201e+00	-9.4971682e-01	6.2989691e-01	9.6516594e-01	-2.7941125e-01	3.5641255e-01
9.2523665e-01	-4.3393307e-01	-3.3127607e-01	1.3714993e+00	5.4175243e-01	-4.8988037e-01	1.5011336e+00	6.1607730e-01	5.2229583e-01
-4.3132845e-01	-1.4764863e+00	-8.5466545e-01	9.2375483e-01	8.9764398e-01	6.9500243e-01	-5.7816078e-01	-2.7814747e-01	1.2773688e+00
1.4585399e+00	1.3568165e-01	-1.0006285e+00	-2.0339591e-01	7.7445492e-01	4.6435821e-01	-2.0214640e-01	-1.3465009e-01	1.1176224e+00
-1.6786148e-01	-3.9482240e-01	-6.1751502e-01	-4.2225950e-01	6.4540126e-01	7.5225600e-01	-1.4128111e+00	-1.1173192e+00	1.1310697e+00
-9.7758278e-02	-7.3644076e-01	1.2472631e+00	-5.7689543e-02	-6.6041776e-01	1.3976998e+00	-9.5839113e-01	-1.4851186e+00	1.5871339e-01
2.9572347e-02	5.1528347e-01	-1.0970222e+00	1.1639768e+00	-3.9451112e-01	1.4514314e+00	-7.3411114e-01	-4.3460121e-01	4.4167550e-01
6.5079634e-01	-1.0016535e+00	3.5550308e-01	2.6116004e-01	1.3536938e+00	-2.5995524e-01	-1.1716289e+00	-1.3961094e-01	8.7228430e-01
-1.0915036e+00	1.0042612e+00	-3.6889359e-01	5.1187663e-01	1.1830139e-01	8.8760555e-01	-6.4119715e-02	3.2857309e-01	7.6133317e-01
-1.1422808e+00	-1.1587519e+00	1.5093037e+00	1.4298353e+00	-3.3668108e-01	-1.4369742e+00	-9.3766543e-02	-5.9196650e-01	6.2447562e-01
-4.0970610e-02	-4.1074219e-01	-1.4925962e+00	1.1991901e+00	-5.9050251e-01	1.3390167e+00	1.1452307e+00	2.4294423e-01	1.0533408e+00
-5.8425600e-01	-1.2648864e+00	-4.4631090e-01	1.4703931e+00	-2.8441202e-01	-1.5164281e+00	-6.4611311e-01	-9.0682406e-01	1.1504856e+00
1.0280668e+00	2.1185268e-01	9.7587956e-01	1.1288799e+00	1.3912291e+00	1.1346649e+00	1.2628223e+00	-1.1259970e+00	2.9117553e-01
-4.1640147e-02	1.1834666e+00	-6.4746841e-01	1.0066391e+00	-4.8725629e-01	8.4556223e-01	-3.4504542e-01	3.2216655e-01	4.6583276e-01
7.2921225e-01	1.1003345e+00	4.7534589e-01	1.1065705e+00	8.1561864e-01	-1.2006914e+00	2.0159080e-01	-1.4524534e+00	7.8811555e-01
5.1732214e-01	-1.2346954e+00	6.8239399e-02	-9.8777764e-02	1.3337187e+00	1.5705971e+00	1.4996411e+00	-1.2101949e+00	6.9674011e-01
-1.2951973e+00	-1.3060012e+00	2.1825894e-01	-1.3969600e+00	5.4673582e-01	1.3636528e+00	-5.2910058e-01	-1.0746130e+00	1.1402621e+00
-2.8608034e-01	3.4642179e-01	-1.1022861e+00	1.5571768e+00	-1.6953072e-01	9.9378150e-01	1.2552831e+00	-4.3868166e-03	9.6695802e-01
-1.5155425e+00	9.3981931e-01	-1.5031288e-01	-1.1384952e+00	1.2179416e-01	-1.3624218e+00	-1.3928624e+00	-1.4725956e+00	3.0695085e-01
3.1101998e-01	-3.8466580e-01	-4.6813742e-01	7.5151687e-01	-1.3240369e+00	8.4613234e-01	1.3095655e+00	-4.4808254e-01	6.9374714e-01
-2.9736531e-01	3.1957949e-01	-1.4376168e+00	1.5416256e+00	-1.1875973e+00	-1.0436404e+00	-1.3072279e-01	-5.2570108e-01	6.3600719e-01
4.5518314e-01	-9.5096270e-01	-3.5964448e-02	1.3868915e+00	-1.4099935e+00	-9.5271786e-01	-1.0846070e+00	-1.2995846e+00	8.7559367e-01
4.8490068e-01	-1.5482631e+00	-1.2686808e+00	-1.1313718e+00	-7.2802152e-01	3.6869989e-01	-1.4684614e+00	1.3759216e+00	8.4234828e-01
4.3440263e-01	1.5463341e-01	-7.2808463e-01	1.0949416e+00	6.4572891e-01	1.5183065e+00	-7.9635314e-02	-1.4935753e-01	4.6465296e-01
-5.6296228e-02	8.2657348e-01	-4.1499026e-01	-7.6549925e-01	-1.4368673e+00	-9.7980662e-01	-1.1225603e-01	-1.1953535e-01	6.0597949e-01
-5.5131308e-01	9.7816378e-02	-4.0553985e-01	-9.2400200e-01	-5.5911844e-03	6.1876385e-01	1.4100283e+00	-1.5528499e+00	4.2419178e-01
-1.3622300e+00	9.4691085e-01	1.3477918e+00	-8.0910348e-01	2.7674348e-01	8.9236951e-01	1.3117232e+00	-1.5375592e+00	3.6681241e-01
9.2711864e-01	-5.7773513e-01	1.4537685e+00	1.3524218e+00	-1.4710413e+00	9.0971377e-02	-1.5659312e+00	9.8306149e-01	4.9868834e-01
-2.1652643e-01	6.6855409e-01	1.3206118e+00	7.2998780e-01	5.4252973e-01	-9.9968561e-01	-1.4837178e+00	6.7868472e-01	5.8374710e-01
-1.1953615e+00	-1.0882835e+00	1.7101321e-01	9.8569293e-01	1.3952490e+00	-4.7849478e-01	1.1181292e+00	-4.6878550e-01	7.4469196e-01
4.4615737e-02	-4.2764875e-01	-3.3824445e-01	9.2302405e-01	1.1027887e+00	4.1541344e-01	-6.0907320e-01	2.3644829e-01	1.0773317e+00
-9.8395351e-01	4.7142576e-01	1.4083073e+00	8.0603586e-02	-8.2660074e-01	1.2348600e+00	-1.3844043e+00	-1.2824607e-01	6.5337328e-01
3.7046694e-02	1.5610306e-01	6.6174701e-01	6.7803741e-01	-5.5597546e-01	9.3050031e-01	-1.0477326e+00	-2.9907321e-01	4.5446174e-01
6.0843864e-01	3.9422243e-01	7.4394086e-01	1.2182371e+00	-1.1829835e+00	7.0479791e-02	-6.1494510e-01	2.4820419e-02	4.8636944e-01
1.4418596e-01	7.7416173e-02	-1.2465945e-01	1.1507780e+00	7.3615377e-01	1.7341115e-01	4.5756043e-01	-6.7504192e-01	3.7178142e-01
1.1654708e+00	5.1425841e-01	2.9096689e-01	1.4822614e+00	9.4447070e-01	-8.7671029e-01	-4.0066357e-01	-1.1384686e+00	8.0441546e-01
2.3744932e-01	6.1977851e-01	-1.1792354e+00	-4.6156692e-01	-7.4861186e-01	-8.0031823e-01	-1.5196132e+00	1.1993493e+00	8.4400944e-01
9.8797040e-01	-9.0390256e-01	8.9940398e-01	-9.6303108e-01	1.5911158e-01	1.3512679e+00	1.0091683e+00	1.0052717e+00	5.1547439e-01
1.5012667e+00	8.5178945e-01	-1.0610750e+00	-1.7806479e-01	6.9291589e-01	1.8597030e-01	-3.6759246e-01	1.1560982e-01	1.0744390e+00
-1.4825583e+00	-2.1246948e-01	1.3336730e+00	1.2028411e+00	-4.6568678e-02	-2.8182895e-01	1.3862892e+00	1.5499865e+00	2.4927057e-01
-1.3854488e+00	1.0162742e+00	-2.2117361e-01	2.2291587e-03	-4.2320789e-01	8.2261508e-01	1.3116354e+00	5.3719028e-01	5.6324011e-01
2.4678717e-01	-3.1953449e-01	-7.6077621e-01	-2.3364109e-01	-2.8923165e-01	-4.5757197e-01	1.0035186e-01	-3.8027785e-01	8.9848076e-01
8.4960712e-01	-1.4343257e+00	-8.3737617e-02	1.8502959e-01	-1.0725570e+00	2.0674382e-01	-4.2155142e-01	-1.3303993e+00	6.1825109e-01
8.0819764e-01	-1.2717458e+00	5.5372859e-02	-3.8443544e-01	-6.1535623e-03	1.4191460e-01	-7.2330797e-01	-1.3056226e+00	9.5413106e-01
-8.6889248e-01	1.1639267e+00	7.4021319e-01	1.0495958e+00	2.4963617e-01	6.8987996e-01	1.3265695e+00	4.2482228e-01	2.4931774e-01
-1.3533371e+00	-5.8134715e-01	5.6164508e-02	5.1387454e-01	-1.5325964e+00	-8.0607665e-01	-2.3001489e-01	-8.5209731e-01	7.9377864e-01
-4.0607903e-01	-3.4844385e-01	1.4790931e+00	4.5121652e-01	-4.2875289e-01	-1.1827186e+00	1.4402289e+00	1.3213388e+00	4.1408171e-01
-1.4309787e+00	-3.6706253e-01	-3.0566231e-01	-2.0861892e-01	7.6374405e-01	-1.0951877e+00	-4.3510499e-02	-1.7715905e-01	1.2251342e+00
-1.5678512e+00	8.6800182e-01	-7.6251527e-01	-2.4071391e-01	-3.0131615e-01	-2.2880556e-01	7.1012485e-01	7.1776284e-01	8.5674860e-01
8.0424657e-01	-1.0496580e+00	-1.0376861e+00	6.9257003e-01	2.6886361e-02	-2.2568559e-01	1.5778778e-01	-2.7568368e-01	1.0654175e+00
-1.3010495e+00	-1.5586857e+00	-1.4099279e+00	4.2367105e-01	-5.1027912e-01	-1.1954286e+00	4.3497536e-01	4.3353224e-01	1.0262014e+00
-1.2534606e+00	9.0981769e-01	3.7579912e-01	-1.3512676e+00	2.8669139e-01	-1.0842593e+00	1.4474138e-01	1.0229825e+00	2.7999746e-01
6.0848722e-01	1.1744659e+00	1.4545662e+00	-1.8203634e-01	-7.8099837e-01	1.2325437e+00	1.0757394e+00	-6.7010154e-01	3.9706882e-01
9.6055689e-01	6.2177040e-01	-9.8028509e-01	4.2648705e-01	-6.6541761e-01	-2.9959990e-01	8.6729259e-02	2.1313298e-01	6.6714135e-01
-5.6498216e-01	1.1578702e+00	-1.1396352e+00	-1.1466655e+00	3.9608144e-01	5.9742107e-01	-4.0342660e-02	7.1037861e-01	1.1832950e+00
1.3794586e+00	1.2989778e+00	4.4122591e-01	-1.4775828e+00	-9.4047721e-02	3.2586016e-01	5.4492625e-01	1.2812495e+00	6.1950120e-01
-3.9329285e-01	9.9337296e-01	1.5251302e+00	5.5590288e-01	-4.3894719e-01	9.3575163e-01	8.3288436e-01	1.4841355e+00	1.8480716e-01
-1.6194334e-01	1.1958955e+00	6.0850422e-01	-3.6766084e-02	-9.2581623e-01	3.6479611e-01	-6.4945788e-01	-3.8047044e-01	5.9686511e-01
-1.1625442e+00	-4.9393585e-01	1.2463347e+00	9.6617478e-01	1.1505033e-01	-1.2606106e+00	-1.5456857e+00	-1.4256462e+00	6.7533703e-01
-1.3151017e+00	-1.4920214e+00	-9.9314483e-01	-3.9289743e-01	-1.5701290e+00	-1.8225365e-01	-5.1053476e-01	9.1771324e-02	9.4116417e-01
1.3312467e+00	-2.1033479e-01	-5.0342395e-01	2.0073509e-01	2.2012755e-01	-8.4333806e-02	-8.6814368e-01	-1.2134678e-01	9.2541301e-01
-1.6021702e-01	-8.0507722e-01	-7.3734956e-01	-3.1581667e-01	-1.1124329e+00	-5.3999530e-01	-1.3344707e+00	-5.8166062e-01	8.9198937e-01
-4.2260320e-01	-9.3351454e-02	9.4892521e-01	1.3608232e+00	-1.0424836e+00	3.6022770e-01	-6.1895661e-01	6.6630543e-01	6.6362200e-01
4.4893933e-01	-1.3031569e+00	-1.2799684e+00	5.6064073e-01	-3.5962418e-01	4.9794962e-01	-9.9046854e-01	-1.1824767e+00	7.6884345e-01
-7.8219000e-01	1.0252385e+00	1.1968349e+00	1.0523460e+00	2.2069908e-01	-1.6353042e-01	4.9468713e-01	-1.7002230e-01	2.7260180e-01
1.2978799e+00	-4.5211146e-01	-4.1358083e-01	-3.8745845e-01	-9.3155688e-01	4.3785361e-01	1.5523911e+00	1.2844892e+00	6.8079794e-01
1.3894987e+00	8.7524957e-01	1.2915916e+00	5.0746383e-01	1.0212934e+00	1.3956300e+00	1.0988345e-01	-6.1556861e-01	2.9820939e-01
-1.2955744e+00	1.3826516e+00	-6.2514319e-01	-4.7941789e-01	-7.8419828e-01	1.2222991e+00	-4.4526844e-01	-5.9704865e-01	7.1105734e-01
-3.4080329e-01	-1.3546756e-01	-1.2957546e+00	6.0864091e-01	-1.0392702e+00	3.0687645e-01	-3.5291485e-01	-3.4964434e-01	5.2900157e-01
-7.5755545e-01	8.5132999e-01	-2.2772232e-01	4.0207762e-01	2.4102133e-01	-8.2258093e-01	-1.1295193e-01	1.4473591e+00	7.7995589e-01
6.4053265e-01	1.4901618e+00	-8.6913460e-01	1.5282317e-01	1.3325558e+00	1.0315371e+00	-8.6118323e-01	4.1217972e-01	1.2463042e+00
-8.0569439e-01	3.7331608e-01	8.6058221e-01	-1.3237421e+00	-1.4807537e-01	-1.4064351e+00	-5.8911376e-01	2.9279571e-01	3.6545370e-01
-1.0412272e+00	5.6279087e-01	-8.7367778e-02	6.2524211e-01	-5.6134835e-01	-6.1113873e-01	1.0650555e+00	1.2834860e+00	7.5711315e-01
-1.2347385e+00	-5.0938846e-01	-1.2664826e+00	-1.8332099e-01	-3.7898259e-01	-1.5422581e+00	-4.0679570e-01	1.3745740e+00	9.8775696e-01
1.1104393e+00	-4.5185701e-01	-1.4823487e+00	8.2657546e-01	-1.5520087e+00	5.4969174e-01	-9.0966297e-01	-8.0664441e-01	3.9846269e-01
-1.0484004e+00	-1.1313499e+00	-1.0056043e+00	1.3108295e-01	3.2960253e-02	-7.5487233e-01	1.4259815e+00	-1.3003316e+00	8.6158098e-01
7.2692144e-01	1.4617590e+00	5.7694795e-01	8.5463397e-01	1.0426672e+00	-1.3881756e+00	-7.3918687e-01	1.3860681e+00	5.3554596e-01
-2.8520555e-01	5.2965784e-01	-1.3323690e+00	4.7155974e-01	3.0449538e-01	1.5418360e+00	1.4851412e+00	7.3767444e-01	8.0701404e-01
6.2075456e-01	-1.3141821e+00	1.4593213e-01	-7.3376336e-01	-5.2558185e-04	-1.3598830e+00	8.1390893e-01	1.3697726e+00	5.6871816e-01
-2.0729235e-01	1.0799933e+00	-9.0258090e-01	1.5320317e+00	5.9132386e-01	-4.6659060e-01	8.7303989e-01	1.7700320e-01	8.1025470e-01
6.3794897e-02	-6.7574346e-01	1.0738080e+00	3.6333863e-01	1.5224871e+00	-5.7294047e-01	-1.1978345e+00	-1.9547603e-01	7.4605866e-01
9.1774324e-01	-3.6296968e-01	-9.5892560e-01	-6.2384107e-01	1.6869615e-01	-4.2895714e-01	-6.7854012e-01	7.4029797e-01	6.8384037e-01
-7.0934281e-01	5.4156379e-01	-2.9221638e-01	-1.4022465e+00	1.5595775e+00	4.7251206e-01	-2.4240526e-01	1.4810211e+00	8.3378594e-01
4.1957835e-01	8.6870892e-01	-9.7146151e-01	6.7079912e-01	1.5111015e+00	-4.3610609e-01	5.4041220e-01	6.8226165e-01	1.2054181e+00
-1.0221496e+00	1.4097444e+00	-4.9655363e-01	-1.0551650e+00	4.4801467e-01	-2.9944415e-01	3.6351471e-01	-4.1685202e-02	1.1512520e+00
-1.0397421e+00	-3.1685930e-01	-1.5066910e+00	1.3196066e-01	-6.1495127e-01	7.3683611e-02	-8.0601226e-01	-2.8026313e-02	1.0288801e+00
-1.4078907e+00	-4.5467966e-01	1.4220464e+00	-1.0168382e-01	3.5375300e-01	6.1293632e-01	-1.0058395e-01	2.0065201e-01	4.9595756e-01
5.7594284e-02	-1.4477750e+00	-9.0324432e-01	2.6364779e-02	-1.5082055e+00	3.3842412e-01	-3.3764997e-01	1.4294653e+00	8.8744169e-01
3.7659153e-01	-1.1189815e+00	-6.5166459e-01	1.4827861e-01	1.1015108e+00	-1.5300676e+00	-1.1667581e+00	1.2634695e+00	4.7635624e-01
-9.3538582e-01	-1.1485800e+00	-9.3476537e-01	8.3554137e-01	-3.1299293e-01	1.2316203e+00	1.1865249e-01	1.1065004e+00	7.0291688e-01
-4.9981308e-01	9.0349351e-01	5.0323651e-01	2.4666821e-02	-1.4460269e+00	-1.1160953e-01	-7.1899675e-01	-1.2755488e+00	4.9041242e-01
2.6037196e-01	-1.4435474e+00	7.2852688e-01	-1.1496448e-01	-1.3870498e-02	-2.9049269e-01	1.5286305e+00	7.9342521e-02	6.0262674e-01
-1.6696114e-01	8.1850198e-01	1.5647562e+00	-1.2853546e-01	-6.4359655e-01	-2.7567927e-01	-2.5139124e-01	1.4744725e+00	6.4230865e-01
-6.7361275e-01	-4.7139709e-01	5.8522567e-01	1.1201857e+00	-4.2377455e-01	5.0763825e-01	3.0961400e-01	5.7692749e-01	2.3946401e-01
8.9044341e-01	3.2585649e-01	-4.3877995e-01	-6.0307037e-01	-3.8833047e-01	-6.8952021e-01	1.2050481e+00	1.4654445e+00	6.7499641e-01
-8.6496455e-01	8.7411136e-01	-1.2566912e+00	-1.0258089e+00	1.5593523e+00	5.6907171e-01	-6.0488018e-01	-3.6097584e-01	1.2974045e+00
-1.3100277e+00	1.1023325e+00	-2.8145204e-01	2.9080687e-01	8.6861586e-01	1.3802272e+00	-2.7352345e-02	-5.0553049e-01	4.6694825e-01
-1.3545610e+00	9.3051595e-01	8.7406793e-01	-7.2709601e-01	-1.5437436e-01	-4.2178723e-02	-1.0383414e+00	1.5571591e+00	4.1109711e-01
1.0159544e+00	3.3334223e-01	3.7243498e-01	4.9282455e-01	3.8562367e-01	1.1021397e+00	1.4309410e-01	-1.4349193e+00	2.3179039e-01
5.9015341e-01	1.0231901e+00	1.4621400e+00	-1.4775339e+00	7.1312680e-02	8.3217104e-01	-1.4774427e+00	1.3183423e+00	4.2520199e-01
7.0031389e-01	-3.2222048e-01	6.4877484e-01	1.3775601e+00	-1.5361867e+00	-7.1788099e-02	-2.3047573e-01	-2.7347474e-01	4.8499670e-01
-1.3721357e+00	5.4604396e-01	-5.0932994e-01	-8.8561132e-01	-1.0806791e+00	-1.7099715e-01	-2.1918183e-02	-1.3989255e-01	7.6419129e-01
9.4705752e-01	7.6861294e-01	5.3163356e-01	3.9646930e-01	-1.4270453e+00	6.0821261e-01	-8.1255394e-01	-1.2627351e+00	2.2795318e-01
-1.2542824e+00	-1.5124501e-01	4.7565552e-01	1.4151456e-01	-1.4315282e+00	-5.1322416e-01	-9.0874298e-02	-1.3302120e+00	4.9439661e-01
-6.3826718e-01	-4.2636750e-01	-1.0110269e+00	2.4955494e-01	-1.3774596e+00	1.0549377e+00	-5.1029620e-01	-1.2992341e+00	6.7032960e-01
1.1824198e+00	1.4245717e-02	5.4623583e-01	2.4366552e-01	-5.6649206e-01	-8.1164684e-01	-2.1739914e-04	9.8286129e-01	5.7955769e-01
-7.8492245e-01	6.6672487e-01	8.5193503e-01	-1.3504195e+00	1.1352911e+00	-5.5308643e-01	-5.1223462e-01	4.5548569e-01	6.1470159e-01
-6.4408709e-01	-4.1607534e-01	-9.0721137e-01	1.5066004e+00	-1.1967463e+00	2.4896570e-01	-1.1633748e+00	-7.1334335e-01	6.9337092e-01
7.5659869e-01	2.0697838e-01	-1.3522899e+00	1.9560304e-01	-1.2386383e+00	-2.3483937e-01	4.3255717e-01	-8.4409531e-01	3.9794235e-01
-1.0129352e+00	9.4257012e-01	1.4864065e+00	1.3944421e+00	1.5406069e+00	-1.1048917e+00	3.4296867e-01	7.2248511e-01	5.5864564e-01
-1.1133364e-01	-1.2756967e+00	8.9907899e-02	1.0667690e-01	-2.7076691e-02	3.8599976e-02	-5.4810265e-01	5.5164780e-01	1.0146068e+00
1.2046547e+00	7.3501524e-01	-2.4013485e-02	-9.3079637e-01	4.5299495e-01	-1.5598758e+00	-8.1154584e-01	7.0463535e-01	2.5333407e-01
-9.3321021e-01	6.5888993e-01	-1.4707831e+00	1.2367596e+00	1.4070958e+00	-2.4123478e-01	1.1442953e+00	-9.9791461e-01	8.8590291e-01
1.5081586e+00	-1.5099791e-01	-1.4010772e+00	1.4412838e+00	-8.5022191e-01	1.3632247e+00	-6.5831223e-01	1.0123658e+00	4.6180612e-01
1.2514453e+00	5.8505005e-01	1.4737697e+00	-1.1637557e+00	1.4253260e+00	8.2167807e-02	4.3563222e-01	-3.3522069e-02	6.5903549e-01
7.8772454e-02	-2.4883919e-01	1.3307158e+00	3.1321889e-01	8.1063874e-01	-1.3064380e+00	-1.3818001e+00	-1.0603330e+00	6.5409555e-01
1.3181346e+00	-7.8039751e-01	3.4312131e-01	-1.0394341e+00	-6.8198486e-01	-7.1271549e-01	-1.2612819e+00	1.2377661e+00	4.2559214e-01
-6.2381452e-01	8.4576802e-03	-1.1242847e+00	6.2716846e-01	1.5520029e+00	2.8351335e-01	1.1023983e+00	-4.9184095e-01	5.7086186e-01
-9.5591392e-01	7.7656186e-01	8.2609437e-01	7.7699148e-01	-1.3057169e-01	-7.8719759e-01	-1.1049203e+00	-8.4065201e-01	8.3293175e-01
5.9659333e-02	1.4992713e+00	1.4701178e+00	-7.0491561e-01	1.4548395e+00	-1.1831868e+00	-4.4090085e-01	-1.0962399e+00	7.1243819e-01
5.2635609e-01	-4.6177236e-01	-3.5635881e-01	-5.7072411e-01	4.7107238e-01	4.6043633e-01	7.9649350e-01	9.3714740e-01	9.1449371e-01
-2.5808439e-01	-1.2741542e+00	-1.4468593e+00	-8.7774908e-01	4.9996424e-01	8.1076246e-01	3.3998045e-01	-1.3092610e+00	9.9527220e-01
9.1512639e-01	1.5278967e+00	-1.4366451e+00	5.9026398e-01	-8.6128885e-01	1.3973601e+00	-5.0562324e-01	-1.0340088e+00	7.7510115e-01
-7.0842417e-01	-1.7918567e-02	5.8663810e-01	-5.8294875e-01	7.7725383e-01	-1.1160158e+00	-1.5996578e-03	7.0462096e-01	8.1300766e-01
1.5116303e-01	4.3553140e-01	1.3087800e+00	1.0078270e+00	5.6289793e-01	-1.5691131e+00	1.3888858e+00	-1.2397549e+00	2.8285525e-01
-9.5137985e-01	6.5287488e-02	-7.6660660e-01	-9.1949832e-01	1.2900796e+00	-1.5558846e+00	9.7084700e-01	-1.5187657e+00	1.2178643e+00
8.6553028e-01	8.7096966e-01	-6.8572652e-01	-5.1405753e-01	-9.0392957e-01	8.6461324e-01	-4.0672084e-01	-4.5433561e-01	6.0793879e-01
1.3934399e+00	-1.4347363e+00	1.4978956e+00	-3.8514639e-01	3.9771185e-01	-1.4528882e+00	3.4846734e-01	1.1931389e+00	5.3413593e-01
-1.0295044e+00	1.2519280e+00	1.5490073e+00	-1.4745449e+00	-9.6604780e-01	9.0803496e-01	7.6190941e-01	2.9985245e-01	5.0295687e-01
1.0114934e+00	-1.2340524e+00	-2.1267595e-01	1.3486528e+00	-6.1449611e-01	-5.1360914e-01	2.7974698e-01	5.0543651e-01	8.5731058e-01
1.0114820e+00	7.6429912e-02	6.8779245e-01	2.1722962e-01	-1.4210911e+00	8.6776312e-01	-1.2566822e+00	4.9230873e-03	5.2405086e-01
8.1994720e-01	-3.5387255e-01	-1.3331820e+00	4.4762159e-01	1.2506662e+00	1.2216234e+00	-1.3001908e-01	1.0609186e+00	1.1374166e+00
-1.3143555e+00	-5.0109033e-01	-9.5032362e-01	-9.3826550e-01	-4.4944373e-01	1.5172749e+00	1.3177776e+00	-8.2040973e-01	9.9699216e-01
1.3074296e+00	7.8474900e-01	-2.3209467e-01	1.3668446e+00	-1.4120921e+00	5.3149905e-01	-3.4014295e-01	-1.7616538e-01	1.3272492e-01
-1.4713961e+00	8.7051535e-01	1.0429198e+00	1.2323550e+00	-1.4408590e+00	1.3565968e+00	9.1601341e-01	-1.4312135e+00	5.8740700e-01
8.6350017e-01	3.5454052e-01	1.4077710e+00	-3.3057571e-01	-1.1213479e+00	-1.3578368e+00	-1.5081949e+00	7.6922574e-01	4.8942969e-01
-1.3106751e+00	-8.3878464e-01	1.0721209e+00	1.4914634e+00	-7.9299667e-02	-6.3419844e-01	1.2802111e+00	7.2328695e-01	2.3213593e-01
3.3061755e-01	-1.1272122e+00	-1.0396328e+00	2.5819405e-01	-7.5421321e-01	4.5066076e-01	-2.6070355e-01	1.4617288e+00	7.8830071e-01
-7.8824309e-01	-1.2509509e+00	4.2929431e-01	9.2798411e-01	2.6491210e-01	-1.2456720e-01	8.7712339e-01	2.1168635e-02	5.3969357e-01
9.4539832e-02	-1.1935469e+00	-1.0888739e+00	-1.3786150e+00	7.4092237e-01	-1.3002266e+00	1.4600354e+00	7.8127095e-01	1.2046167e+00
-7.1492098e-01	-8.7316997e-01	-9.2629061e-01	-1.1371130e+00	-5.9103805e-01	9.2509578e-03	-1.6519008e-01	-1.0363982e+00	8.7131097e-01
9.1498867e-01	-9.8846504e-01	1.5669161e+00	-1.1497511e+00	1.3938651e-01	1.5428074e+00	8.1830510e-01	1.3870944e+00	2.4782944e-01
1.1847426e-01	-3.8998369e-01	-8.1162659e-01	6.9567572e-02	-9.5898639e-01	-7.4261586e-01	-6.3880762e-01	-8.6322722e-01	8.4346551e-01
-5.7282131e-01	-1.0935557e+00	-2.1287246e-01	5.4971539e-01	-1.3140139e+00	4.0278613e-01	1.5240477e+00	-3.8499383e-01	7.8739265e-01
-1.5678925e+00	-1.0736367e+00	5.2660250e-01	-3.5744380e-01	7.6458368e-01	-5.0576329e-01	1.2653287e+00	1.0895380e+00	1.1173760e+00
1.0928755e-01	6.9598525e-01	7.4170338e-01	-8.3271828e-01	1.2439522e+00	7.8603291e-01	9.3879840e-01	-4.7901107e-01	4.4192272e-01
-1.0358421e+00	1.2745862e+00	-3.0858423e-02	2.9910980e-01	-1.9407857e-01	4.5803495e-01	1.3064219e+00	1.1629279e+00	4.4777575e-01
1.3087224e+00	-5.5058587e-01	-2.7472968e-01	5.9020541e-01	-9.0540999e-01	1.2914728e+00	4.4262440e-01	1.4812296e+00	3.4768750e-01
1.4065183e+00	1.4352473e+00	7.5944027e-01	-1.5673245e+00	6.4912523e-01	5.2011114e-01	-1.0319458e-01	1.0451901e+00	7.3313233e-01
-1.1316353e+00	1.0523821e+00	-3.7835097e-01	2.3221142e-01	-9.0349667e-01	-1.5444761e+00	-2.3213711e-01	-1.2760320e+00	8.4709286e-01
-1.9239418e-01	2.1967487e-01	-3.6123539e-01	9.1934057e-01	1.3903160e+00	9.7070008e-01	3.2961869e-01	1.3825291e+00	8.2205310e-01
-8.7016460e-01	7.0413576e-01	1.4153578e+00	1.0043317e+00	-1.2518808e-01	2.6557287e-01	1.2733993e+00	9.4804814e-01	1.6451249e-01
-7.4270795e-01	3.0214290e-02	-2.2070004e-01	2.6034574e-02	8.3103859e-01	-7.1987277e-01	1.4930874e+00	-3.1280766e-01	9.6025419e-01
-1.1449822e+00	-1.1264369e+00	9.1540305e-01	8.8170041e-01	-2.5528255e-01	-6.2827062e-01	-7.2226045e-01	-1.4739130e+00	7.0116244e-01
-1.4600648e+00	-7.8735003e-01	7.9980364e-01	-1.5382881e-01	8.8182217e-01	-4.5145579e-01	8.2699468e-02	-5.9835545e-01	9.3223810e-01
-3.2933357e-01	-6.0371004e-01	-5.7515844e-01	1.2987909e-01	-1.2488514e+00	-6.7125677e-01	1.3460032e+00	-3.2190546e-01	4.8306489e-01
3.7696747e-01	7.8963296e-01	-7.3095338e-03	-5.2911236e-01	-4.6428508e-01	-3.5333269e-01	-3.3366371e-01	-4.4244612e-01	8.2989495e-01
-9.0008680e-01	1.2738353e+00	-3.2922148e-01	1.0573311e+00	4.7683675e-01	-8.5245478e-01	-1.4305609e-01	-4.2194063e-02	1.0552896e+00
-9.9030175e-01	-6.0382529e-01	-8.8074900e-01	-1.4265791e+00	-7.5717399e-03	-1.5449911e+00	-1.0253483e+00	8.4431768e-01	8.0251109e-01
1.5641140e-01	-1.1473517e+00	4.3611904e-01	1.2063293e-01	1.5470655e+00	-1.4026019e+00	-1.3928677e+00	-1.2678902e-01	6.8391733e-01
-7.0668062e-01	-4.4445853e-01	5.1699226e-01	1.1503806e+00	-1.4319661e+00	9.8139374e-01	1.2216169e+00	-9.4329272e-01	5.9446940e-01
1.1805699e+00	6.9276490e-01	-5.5639092e-01	1.0861443e+00	6.8768638e-01	9.2319323e-01	1.4065584e+00	-1.4442323e+00	3.6672238e-01
-4.6163220e-01	5.5729868e-01	1.2591098e+00	-9.6709193e-01	2.5661935e-02	-2.1749655e-01	-4.5703452e-01	-1.2681083e+00	6.4825386e-01
1.0814533e+00	1.4311875e+00	8.9986255e-02	6.8626882e-01	9.0194402e-01	1.3492731e+00	-1.8518962e-01	-5.3216117e-01	4.7549122e-01
-1.2702229e+00	-1.2069528e+00	1.2929296e+00	1.3333934e+00	7.8862011e-01	1.2179434e+00	8.3642727e-01	8.1528923e-02	5.7186283e-01
-1.5148931e+00	7.9428940e-03	-1.2929629e-01	1.3617628e+00	-4.1292116e-02	-6.4273579e-01	-7.9401147e-01	5.2220718e-01	1.1695381e+00
-1.3409165e+00	1.5493274e+00	8.9940870e-01	6.4411833e-01	2.9538626e-01	1.4767306e+00	5.3480506e-01	-8.7387949e-01	3.6061156e-01
1.0013172e+00	-1.1153811e+00	-9.8180568e-01	-2.3146390e-01	8.4051297e-01	8.2943808e-01	3.7209719e-01	-3.4701590e-01	1.0394276e+00
-3.7371255e-01	-3.2614104e-01	-1.5634127e+00	-9.2203718e-01	-1.2406566e+00	1.1192812e+00	-1.0734667e+00	-1.5002244e+00	7.1089894e-01
-9.4307378e-01	6.2675272e-01	3.6348533e-03	7.9768192e-01	-9.6565442e-01	-9.7510887e-02	4.1226866e-01	1.5150183e-01	5.5566866e-01
-9.0614421e-01	7.2795941e-02	1.4007191e+00	1.4641836e+00	-2.8619067e-01	1.0458828e+00	-1.3540880e+00	-1.5404252e+00	3.5021383e-01
8.7539383e-01	1.4018394e+00	-1.2097679e+00	4.3890149e-01	-2.2824751e-01	9.4069408e-01	-4.5941680e-01	-6.1810418e-02	6.5531477e-01
6.6575659e-01	-1.2295118e+00	-1.8207901e-01	1.5783303e-01	-2.7133200e-01	-1.3905023e+00	6.1665500e-01	1.0194704e+00	9.4187208e-01
-9.8207801e-01	9.9136996e-01	-2.9072345e-01	1.1955824e+00	1.3155787e+00	1.3480585e-01	6.4622541e-03	-7.2238288e-03	1.0060806e+00
1.4275503e-01	-1.0524700e+00	-1.0124571e+00	5.2637015e-01	4.0177835e-01	5.9358177e-01	-1.3446383e+00	1.1112234e+00	1.1633671e+00
-8.9301968e-01	1.4456247e+00	-1.5003544e+00	-2.1800780e-02	1.4061918e+00	-1.3693979e+00	1.2819409e+00	-4.3678426e-01	1.2561087e+00
1.5479093e+00	-4.6353211e-01	1.1077293e+00	1.1606232e+00	-3.3514716e-01	-1.6272630e-01	5.3758299e-01	8.6903301e-01	5.0162880e-01
1.8303179e-01	5.6555559e-01	5.2773001e-01	4.4499993e-01	5.7363302e-02	1.3863399e+00	-6.3208791e-02	5.7347412e-01	4.8710166e-01
5.9605194e-01	-1.1665207e+00	8.4219123e-01	-1.0182390e+00	-3.6392355e-01	-9.7793480e-01	-4.9183051e-01	-2.6706488e-02	4.9691580e-01
-6.9401510e-01	9.6567959e-01	-1.3085302e+00	-1.2870542e+00	2.1786861e-01	6.6261063e-01	-6.6504977e-01	3.9181354e-01	1.0745870e+00
4.2172146e-01	7.0918996e-01	-1.3191393e+00	1.4868764e+00	-1.3792287e+00	-4.4910311e-01	2.9511784e-01	4.3192011e-01	3.9724469e-01
4.3956679e-01	1.5318612e-01	-5.5507488e-01	-1.4378834e+00	1.1149495e+00	1.1711401e+00	-5.2931313e-01	-9.3936765e-01	1.0494657e+00
-1.2268891e+00	-1.5069255e+00	1.3866641e+00	-1.3753023e+00	-6.4411328e-01	1.2734076e+00	8.2464134e-01	-1.4489665e+00	1.4619656e-01
1.0889725e+00	6.2237436e-01	1.3284448e+00	1.1323193e+00	3.1633913e-01	-1.5096364e+00	-9.5983706e-01	8.4697142e-01	5.4173497e-01
-5.5812044e-01	-1.2576976e+00	-1.2755208e-01	-8.7746345e-01	1.1370625e+00	-9.5653708e-01	9.6750291e-02	4.9226020e-01	9.5131544e-01
4.6544565e-01	-1.4883709e+00	-1.2015899e+00	-8.9233176e-01	3.0053159e-01	-9.8902421e-01	-1.2628488e+00	-1.5377848e+00	9.9109269e-01
1.7927409e-01	1.4522264e+00	-9.6425950e-01	5.4338004e-01	-6.4656717e-01	-3.6319571e-01	-9.9369375e-02	3.3288002e-01	7.3811296e-01
2.7222230e-01	5.3510652e-01	1.1671089e+00	-2.1539056e-02	-8.5461176e-02	-1.1577257e-01	1.2261981e+00	-4.6194612e-01	2.5817828e-01
1.0812696e+00	-8.4443976e-01	-5.0549221e-01	-7.2375304e-01	-6.3814735e-01	-1.1437024e+00	-1.3681409e-01	-1.0530368e+00	7.2390275e-01
-1.2155859e+00	1.2165253e+00	-9.4105858e-01	1.2935011e-01	5.4819166e-02	1.1988754e+00	2.1137713e-01	1.3441901e+00	8.4235343e-01
-5.7505158e-01	6.5584917e-01	1.5474020e+00	5.2059220e-03	8.5908047e-01	-6.7683313e-01	-5.2585628e-01	6.0986487e-01	7.5560105e-01
-1.3528763e+00	-9.9159467e-01	1.0810449e+00	-4.6866337e-01	-1.9436295e-01	1.7263959e-01	-7.6633183e-01	-1.0179889e+00	7.6271367e-01
1.0556255e+00	4.1733590e-01	1.2910448e+00	-8.5242744e-01	5.9828162e-01	-1.2780070e+00	7.9078372e-01	-2.2518360e-01	6.6783275e-01
1.3245560e+00	-1.0119207e+00	-3.9027320e-01	-1.0854306e+00	-9.1884166e-01	-3.9503939e-01	-1.3764795e+00	9.5845657e-01	6.5335609e-01
4.8697078e-01	1.2316020e+00	3.2385920e-01	3.9689668e-01	1.0977727e+00	-1.2418032e+00	1.9699551e-01	-1.3075457e+00	9.6704973e-01
6.6901784e-01	-4.1951584e-01	-1.2784621e+00	1.0413264e+00	-3.0769745e-01	-1.3869569e+00	-3.3510846e-01	-4.7930829e-01	1.0265439e+00
4.2279233e-01	-1.0687309e+00	1.3806899e+00	-2.4040311e-01	-4.0954404e-01	3.3107857e-02	7.0779479e-01	-6.9082474e-01	2.7650127e-01
-4.1196424e-01	1.4664914e+00	1.4511205e+00	-3.6692807e-01	2.2797499e-02	3.8185578e-01	-1.3043670e+00	6.3506838e-01	7.2293133e-01
1.8729106e-01	1.5267644e+00	7.9794468e-01	-1.3701620e-02	-1.1674245e-01	-4.2369349e-01	-4.6324957e-01	-1.5375123e+00	7.0871315e-01
-7.5054510e-02	-1.9979025e-01	-4.0276023e-01	-9.4686002e-01	1.4050629e+00	9.7397608e-01	-9.6896845e-01	-1.3702881e+00	1.0773814e+00
1.4791042e+00	4.8773466e-01	9.4098246e-01	1.4320442e+00	-4.6041896e-01	-1.2233836e+00	5.6359527e-01	5.8428012e-01	5.7056948e-01
-1.1766809e-01	9.4125602e-01	3.1474321e-01	6.2574068e-01	-5.1878870e-01	3.1596843e-01	4.4386776e-01	-6.2264736e-01	3.4167815e-01
1.5557544e+00	-1.3705991e+00	-5.5288537e-01	-1.2285626e+00	-1.3620668e+00	1.1897858e+00	-1.1970372e+00	-1.8898828e-01	6.5405602e-01
8.7926110e-02	-1.5018959e+00	4.8662205e-01	1.2365580e+00	5.2916962e-01	4.9345348e-01	1.5443521e-01	-1.7579659e-01	2.0829347e-01
1.2255815e+00	3.3223097e-01	1.0911157e+00	1.1949728e+00	-9.4936362e-02	-3.3195195e-01	6.3705900e-01	-1.5162692e+00	2.5287718e-01
-1.0746828e+00	1.1957930e+00	9.0534165e-01	-2.9468450e-01	3.3362998e-01	3.5206948e-01	5.0284488e-01	6.6366712e-01	6.5497222e-01
-1.1782812e+00	9.2470427e-01	1.3438734e+00	1.5291705e+00	-4.2372952e-01	-1.5287723e+00	4.2962781e-01	-1.5422532e+00	1.6701134e-01
1.2286805e+00	4.5775268e-02	1.5702271e+00	-6.0064118e-01	3.6846552e-01	1.0106993e+00	1.3746921e+00	6.3173944e-01	3.4408237e-01
7.4414282e-01	-3.4527504e-01	1.4288665e+00	-1.0391645e+00	7.2092108e-01	2.3127093e-01	1.1772036e+00	-9.3834438e-01	3.6667824e-01
1.2806889e-01	-5.1603353e-01	6.2497525e-01	-1.1244365e+00	-6.0222391e-01	8.2042217e-01	-4.8988205e-01	4.1123942e-02	7.9291264e-01
4.6290230e-01	9.6171581e-01	-1.5268879e+00	1.4165617e+00	6.3435579e-01	3.8518171e-01	6.6672708e-01	1.9703677e-02	8.9850724e-01
1.4155306e+00	6.3492595e-02	1.2656523e+00	1.1628004e+00	-9.4777021e-01	-1.0734620e+00	-3.7902233e-01	1.2924734e+00	5.3338296e-01
-4.5772541e-01	-1.0214501e+00	9.4438865e-02	-6.6115711e-01	-1.2991908e+00	4.9006276e-01	9.2152336e-01	-1.5133543e+00	7.2831403e-01
7.6940292e-01	1.2913639e+00	7.2970788e-01	-2.5427336e-01	-1.4316122e+00	-7.7112875e-01	-8.6395794e-03	-6.1100304e-01	3.8925299e-01
5.5955621e-01	-1.3101648e+00	-5.7746283e-01	-1.0063079e+00	3.5184064e-01	-1.2911867e+00	-6.9214963e-01	7.3833362e-01	3.2130657e-01
-1.4672623e+00	-5.1701624e-01	-1.0380316e+00	1.3178280e+00	9.0832565e-01	1.1476388e+00	3.5873658e-01	-1.1777348e-01	9.4416791e-01
1.2243745e+00	1.5330731e-01	-9.3349215e-01	5.0676536e-01	1.2304597e+00	-1.0128615e+00	5.6933505e-01	-2.1558591e-01	1.2011648e+00
6.3071885e-01	5.3003094e-01	-8.8804683e-02	3.4773886e-01	-7.6816294e-01	1.1273727e+00	-4.7698013e-01	-1.0960497e+00	3.7471927e-01
7.5805422e-01	-1.3266807e+00	-2.8379478e-01	1.0846338e+00	1.4313480e+00	8.0808094e-01	7.3939122e-01	9.9239083e-01	7.5920780e-01
1.4590147e+00	1.5022624e+00	-8.0123388e-01	-1.2211435e+00	1.4914011e+00	3.1127576e-01	-1.1923110e+00	3.9729733e-01	1.0162343e+00
1.5295612e+00	-4.5532311e-01	-1.4716777e+00	2.6549016e-01	-7.8971515e-01	8.5987931e-01	1.0486195e+00	1.4918059e+00	6.6504567e-01
-3.1801888e-01	3.0413336e-01	-7.2768507e-01	1.0316051e+00	4.8649401e-01	6.6528956e-01	-1.8748101e-01	-2.6879308e-01	8.5448064e-01
-1.0941941e+00	1.9817240e-01	1.7270138e-02	-2.6216839e-01	-1.0607862e+00	5.9338798e-01	2.4064673e-02	4.9702415e-03	6.1914992e-01
7.6317145e-01	5.9527331e-01	1.2326819e+00	1.3904403e+00	-9.6060104e-02	-1.4849047e+00	-8.1050115e-01	-1.2881527e+00	5.7679345e-01
-5.0019008e-01	-1.2140191e+00	-1.1188763e+00	-1.1775517e+00	2.9645435e-01	1.8439571e-02	-1.4707725e-01	-1.2680075e+00	1.2023961e+00
2.0727177e-01	6.2455244e-01	6.1993278e-01	9.2193775e-01	-5.7733856e-02	-1.1038011e+00	5.0613615e-01	1.1632536e+00	7.9099463e-01
-4.0959018e-01	7.9175274e-01	-1.4526207e+00	6.7286191e-01	4.1920401e-01	-4.8038830e-01	-8.0256385e-01	6.7271826e-01	9.5857517e-01
-7.5266023e-01	-7.9810946e-01	-8.7927075e-01	-9.4341237e-01	-1.0304764e+00	6.9375372e-03	1.3082162e+00	-2.1609236e-01	1.0427572e+00
1.2331991e+00	7.7489262e-01	1.4836568e-01	-3.1360744e-01	3.8365375e-01	3.6025890e-01	-8.1744062e-01	-1.8321046e-01	9.3222041e-01
1.2911591e+00	-1.4228427e+00	-8.4256814e-01	7.9229126e-01	1.5204825e+00	1.0223714e+00	-5.3982822e-01	-4.5742480e-01	1.2465138e+00
1.5297463e+00	8.6496592e-02	1.2568807e+00	-1.1720942e+00	1.0346069e+00	-1.5160385e+00	2.6672728e-02	-4.6132088e-01	5.6841116e-01
-3.4883087e-01	-8.0918226e-01	3.2481983e-01	1.5403592e+00	-7.7510651e-02	1.3989205e+00	-9.5921383e-01	3.0585288e-02	1.9536657e-01
-5.8853631e-01	2.8323841e-02	-8.4119838e-01	-1.0472719e+00	1.0394395e+00	-2.2284527e-02	1.1466140e+00	-1.1742674e+00	1.0251068e+00
1.3455100e+00	-1.4832795e+00	-8.5428876e-01	8.4491541e-01	-5.3631852e-01	-6.8651133e-01	6.1257825e-01	-4.2728928e-01	7.4873246e-01
8.0259998e-01	-9.4141080e-01	-9.5276538e-01	4.9456787e-01	-6.7606094e-01	8.7388741e-01	6.0358148e-01	2.2979842e-01	5.9365076e-01
-7.0103370e-01	-1.2307089e+00	-4.3001739e-01	-4.5196270e-01	5.8448426e-01	4.7998382e-01	1.9120633e-01	1.2046559e+00	1.2677951e+00
-1.3010038e+00	-2.7765220e-01	1.5024483e+00	2.3400957e-01	-3.3330858e-01	-5.2183573e-01	-2.4452330e-01	-9.1216351e-01	5.6218186e-01
-4.8611665e-01	-1.2353852e+00	-4.7366936e-01	-2.7519938e-01	-4.5760926e-01	8.3364643e-01	-4.9987848e-01	2.4004417e-01	1.0878847e+00
1.1200333e+00	-3.3282065e-01	-1.6517515e-01	-8.5165651e-01	-4.2001013e-01	-4.0763414e-01	-8.3890003e-01	6.1733307e-01	4.4637458e-01
-2.4331197e-02	1.4599186e+00	1.0692181e+00	-6.9475554e-01	4.8428477e-02	7.0652783e-01	7.5035452e-02	-1.1636868e+00	6.1485454e-01
-5.2738609e-01	1.0130849e+00	4.3916079e-01	5.4351878e-01	2.6492277e-01	-6.0704318e-01	1.3421901e+00	1.4713036e+00	7.1997410e-01
-1.3452058e+00	-5.1348206e-01	1.3742346e+00	-8.3137392e-01	9.2018811e-01	1.3181617e+00	1.5541106e+00	7.2412821e-01	5.0130210e-01
1.1688519e+00	-1.3798307e-01	-2.2819614e-01	9.0257516e-01	-4.5904922e-01	-1.6752407e-01	7.3593621e-01	-1.0708235e-01	4.6612358e-01
5.1484191e-01	-5.8611048e-01	5.9214813e-01	-1.1702147e+00	5.1136404e-01	-7.1001404e-01	4.2959295e-01	3.9957224e-01	6.6636703e-01
1.0018521e+00	1.2757758e+00	-3.3192969e-01	-1.4276396e+00	-9.0208633e-01	-1.4370919e+00	7.8880215e-01	-1.1144243e+00	5.2990856e-01
-8.0764103e-01	5.9326253e-01	7.2633682e-01	1.1452583e+00	-3.8753574e-02	-6.3870909e-01	-1.2327020e-01	4.7023713e-02	7.1152469e-01
7.9902762e-01	-4.5176832e-01	-6.8616220e-01	-1.8202850e-01	-1.0216395e+00	3.8456495e-02	-1.4927494e+00	-1.3537999e+00	5.6737188e-01
-1.0513726e+00	3.5935129e-01	4.5845269e-01	5.5832396e-01	1.2511679e+00	-8.2977739e-01	1.2011005e-01	1.2406654e+00	9.0497673e-01
1.0399837e+00	1.4760763e+00	-1.1123627e+00	-1.8653187e-01	-1.4423883e+00	-5.3881678e-01	-1.3544878e+00	1.1135468e+00	1.2229548e+00
-8.1559311e-01	-7.4243785e-01	1.3834435e-01	2.6831840e-01	1.4510828e+00	1.3179997e+00	-8.9573409e-01	9.1386731e-01	9.6184430e-01
-9.0472012e-01	2.5299636e-01	3.7492217e-01	1.4418552e+00	1.6501933e-01	2.5090614e-01	-9.0822936e-02	1.2147421e-01	4.0664802e-01
-3.2265380e-01	1.5350123e+00	-7.1799706e-01	-9.8575639e-01	-5.4646416e-01	9.6217469e-01	3.5293806e-01	-4.1811086e-01	8.5180156e-01
-4.5356756e-01	1.9293168e-01	-5.1926759e-01	1.1520223e+00	-1.5477996e+00	1.4925699e+00	5.0307805e-01	5.5345857e-01	6.8679423e-01
1.5354016e+00	4.7909172e-01	1.3922724e-02	4.0265481e-01	-1.4812927e+00	4.1827205e-03	1.2070238e+00	-2.7766734e-01	4.7085416e-01
4.5305664e-01	1.9259257e-01	1.5213619e+00	4.2885194e-01	1.0360522e+00	1.1839453e+00	1.1849082e+00	-1.4898634e+00	3.4753431e-01
-6.9772568e-01	1.0628263e+00	1.0658902e-01	9.0101043e-01	-9.1884626e-01	-2.7899892e-01	1.9674390e-01	1.5015324e+00	8.1018829e-01
8.8994595e-01	-1.7491260e-01	7.3391308e-01	8.0572900e-01	1.0203966e+00	1.2629845e+00	-1.4223777e+00	-1.5826778e-01	6.4693348e-01
1.9891423e-01	7.7470634e-01	9.8442562e-01	-1.5186554e+00	-1.4879345e-01	-7.6084480e-01	-1.5237850e+00	9.2240159e-01	3.3377584e-01
4.9683390e-01	-1.4121677e+00	-1.5271703e+00	1.3997654e+00	-6.3808464e-02	-1.2364131e+00	9.4922105e-03	-9.5615514e-01	1.0100915e+00
-6.5918672e-02	4.3080144e-01	-3.3900675e-01	-1.5304143e+00	-1.1457655e+00	1.2396090e+00	-6.8564305e-01	-8.5294200e-01	8.2867170e-01
1.0870783e+00	-8.9125007e-01	1.1625496e+00	-1.4539687e+00	1.0817873e+00	-9.3460072e-01	-2.4084613e-01	-3.0895232e-01	5.9499212e-01
-9.7775896e-01	-1.2608230e-01	1.4064680e+00	-1.5435158e+00	1.2022436e+00	1.2894043e-01	-1.5296269e+00	4.9094438e-01	7.0013034e-01
4.7628419e-01	1.5098891e+00	1.1644997e+00	1.4016941e+00	-6.1563634e-01	-5.9705082e-01	-7.8676066e-01	1.4798187e+00	7.2979148e-01
1.3035067e-01	-1.0791000e+00	-3.7581007e-01	-5.3098349e-01	1.4061783e+00	-3.8613184e-01	-1.2296771e-01	-6.7630733e-01	1.1855936e+00
1.1136528e+00	-1.9260888e-02	1.5029662e+00	1.0251632e+00	-5.6343990e-01	8.1251356e-01	4.4966493e-01	-4.1505764e-01	4.3587671e-01
-4.4627970e-01	-1.3370849e-01	-1.1933264e+00	1.4242697e+00	-9.7421920e-01	-5.8778337e-01	-1.1534743e+00	-1.5381276e+00	7.6230532e-01
1.5003259e+00	-9.9983745e-01	-3.1002742e-01	-1.2343370e+00	2.7879422e-01	1.4338354e+00	3.2592360e-01	8.5558897e-01	1.0301195e+00
1.5548543e+00	1.1116114e-01	1.2712953e+00	-1.5662656e+00	-1.5617648e+00	-6.8497410e-01	-1.1395897e+00	8.1426087e-01	5.2226068e-01
6.6862427e-01	-9.6239223e-01	6.8799848e-01	-8.2186948e-01	-5.7435072e-01	-1.5641739e+00	1.2058652e+00	5.0481273e-01	6.5908664e-01
9.1216779e-02	1.1343417e+00	-1.0121010e+00	4.2249393e-01	1.0017106e+00	-2.2296937e-01	5.6277699e-01	-1.0542838e+00	9.6222830e-01
-1.6813871e-02	-1.4440488e+00	1.3423472e+00	8.5615680e-01	-4.4890774e-02	4.7391474e-01	-7.4264783e-01	-7.6537229e-01	5.4418012e-01
1.5260544e-01	-1.3254500e+00	1.0519854e+00	9.3295573e-01	-4.9700702e-01	1.1477272e+00	-1.3454395e-01	1.2097545e+00	4.4459046e-01
1.3000469e+00	1.9569077e-01	-1.6540257e-01	4.9807214e-01	2.9785448e-01	4.7297146e-01	6.6660972e-01	-4.2968216e-02	5.6053959e-01
1.1120620e-01	-2.7277529e-01	3.8857305e-01	-1.2459397e+00	1.4832193e+00	1.0019455e+00	7.9008164e-01	3.9950149e-01	8.2114441e-01
-2.0505532e-01	-9.5057583e-01	-6.2393401e-01	1.3481520e+00	-7.0994390e-02	7.6166569e-01	-6.1005331e-01	8.3805455e-01	8.9494761e-01
-3.7628179e-02	-1.3293218e+00	1.7739100e-01	1.2251478e+00	6.0250159e-01	-6.7480023e-01	9.9237308e-01	1.4228906e+00	9.3527466e-01
-9.5668021e-01	1.0958930e+00	3.9127348e-02	1.0606597e+00	8.9105852e-01	-2.1792556e-01	9.8955465e-02	7.1903136e-01	1.0226423e+00
-2.5302490e-01	-4.8328279e-01	1.0204756e+00	1.1115429e+00	4.8390690e-02	4.2209571e-01	1.2419823e+00	-9.4692045e-01	4.7275600e-01
1.1270058e+00	-1.5168451e+00	1.1783287e+00	-1.3508241e+00	-3.7016626e-01	4.4636916e-01	1.2549437e+00	4.1641809e-01	6.1482848e-01
9.2372314e-01	4.0875881e-01	-4.2932392e-01	9.8946474e-01	-1.0309537e+00	3.2836476e-03	-8.1404535e-01	-7.2958898e-01	5.8462667e-01
-7.3610358e-01	-6.5381304e-01	5.9112932e-01	1.4839487e+00	-1.3558869e+00	-1.3604020e+00	-2.4160447e-02	-5.6582452e-01	9.5725776e-01
-1.0093084e-01	6.5536737e-01	1.3944408e+00	-3.7869601e-01	7.2214108e-01	2.3575705e-01	-7.9917786e-01	-2.1171420e-01	7.9948988e-01
1.1537867e-01	3.3561370e-01	8.5113866e-02	1.2289614e-01	1.0527937e+00	8.2037177e-01	-1.4737149e+00	1.1438409e+00	8.6803870e-01
8.0659474e-01	1.5007233e+00	1.0840949e+00	1.4889958e+00	8.5414092e-01	-4.6184954e-01	-4.0948023e-01	1.1281125e+00	6.9168405e-01
4.6547109e-01	-1.1903999e+00	-8.5512507e-01	-3.7423480e-01	-1.5319498e+00	5.7021442e-01	1.0952448e+00	6.7477678e-01	6.8188095e-01
6.0696955e-01	-1.3898927e+00	6.9934740e-01	-2.9572785e-01	1.0135482e+00	-1.4054160e+00	1.1877826e+00	-1.7608535e-01	8.2539761e-01
5.8583100e-01	9.5659812e-01	1.2336966e+00	-2.9833091e-01	9.8869313e-01	8.0895173e-01	1.3828942e+00	-8.6118065e-02	2.9265674e-01
3.1025860e-01	-1.1266157e+00	2.2774743e-01	-6.5751070e-02	1.0819389e+00	-7.6129062e-01	8.0078672e-01	8.8790238e-01	8.9336029e-01
-5.2743633e-01	-6.5064069e-01	1.2912242e+00	7.6237475e-01	6.0904712e-01	6.9534688e-01	2.3947064e-01	4.1026281e-01	2.7123859e-01
9.5206023e-01	5.6589755e-01	-5.1749185e-01	-1.3240435e+00	9.4613631e-01	-2.9632814e-02	4.0284622e-01	-5.0878137e-01	1.0418126e+00
1.1448349e+00	1.4391842e+00	-1.5570482e+00	-1.2988793e+00	-1.0290915e+00	1.4745309e+00	5.0425693e-01	3.2671085e-01	9.4822013e-01
-1.0143729e+00	1.2469032e+00	1.5691832e-01	6.6336608e-01	-1.4737997e+00	1.5583527e+00	-9.7074842e-01	-4.7471752e-01	6.6005662e-02
8.5881464e-01	-8.6264808e-01	1.5299899e+00	-3.1863510e-01	1.3061249e+00	-2.2362802e-01	-1.0781082e+00	1.0679010e+00	5.7329966e-01
-1.5205712e+00	-7.6190240e-02	6.0458532e-01	1.1154062e+00	-1.4089154e+00	-1.1713788e+00	9.4203122e-01	2.9402662e-01	8.2183121e-01
6.1537481e-01	1.2404360e+00	1.3549008e+00	7.4805849e-01	-1.4570342e+00	9.9824265e-01	-9.0822761e-01	-1.9790948e-02	4.0517819e-01
4.8134513e-01	3.9857791e-01	1.5541481e+00	-3.4736748e-02	3.4082428e-01	1.3593913e+00	4.1718204e-01	3.8236604e-01	3.1072000e-01
3.6649767e-01	1.0233649e+00	1.3664274e+00	5.1571505e-01	1.1103335e+00	-1.5138315e+00	-4.5624437e-01	-1.2724583e+00	6.8515476e-01
-9.3678454e-01	-5.2568424e-01	5.0342464e-01	-3.1276266e-02	3.1509044e-01	7.9338476e-01	5.2853748e-01	-1.3854651e+00	3.0888824e-01
1.1246023e+00	-1.0165606e+00	7.4883181e-01	-1.0142325e+00	-1.0002098e+00	1.4985045e+00	-1.2946103e+00	-2.7139543e-02	6.3521655e-01
1.3695933e+00	-1.3526166e+00	3.9613846e-01	7.5632367e-02	1.3674019e-01	-7.8286543e-01	1.5546989e-01	-6.0337227e-01	9.4309750e-01
3.0601672e-01	-8.6292699e-01	8.6429007e-01	-1.1918391e+00	-1.4534520e+00	-6.2928202e-01	-8.2266259e-01	1.8335191e-01	4.2230697e-01
4.3588975e-01	1.5193348e+00	-6.0115247e-01	-4.4489717e-01	8.5747140e-01	1.3995967e+00	-3.4092402e-01	-3.0692363e-01	8.4098369e-01
-1.9497700e-01	5.9496231e-01	-2.0751244e-01	-3.9624591e-01	1.0363161e+00	-1.2241266e+00	3.5494864e-01	2.9617076e-02	9.8767915e-01
-2.9732161e-01	-1.5779115e-01	-4.9381552e-01	4.7146638e-01	3.7564446e-01	3.9461509e-01	-2.6268875e-01	1.4025519e+00	1.0434528e+00
1.1895310e+00	-4.9167359e-01	5.3037947e-01	8.3869469e-01	-1.1447502e+00	3.9379679e-01	-1.0721626e+00	1.3208389e+00	6.5114909e-01
-6.4884208e-01	-1.1693387e+00	1.3894456e+00	-3.8465872e-01	-7.0346968e-01	-7.9306303e-01	3.3860076e-01	8.4548689e-01	7.9771346e-01
-6.2067613e-01	7.2793380e-01	9.5475448e-01	4.3855726e-01	-1.4018068e+00	7.6728149e-01	1.4386479e+00	6.7463255e-01	2.8081998e-01
1.5254648e+00	1.0216114e+00	-6.9669045e-01	6.5551214e-01	-1.3640799e+00	-5.3787528e-01	-1.4839222e+00	5.4132600e-01	1.0644625e+00
-5.1549185e-02	1.4187181e+00	-5.6065377e-01	-3.7282329e-01	1.2524250e+00	1.4338095e+00	8.2399595e-01	1.3715544e-02	5.4807937e-01
6.9242830e-01	-2.9323338e-01	-1.2715415e+00	1.4363667e+00	8.3702294e-01	-1.1202670e+00	7.5951774e-01	1.1808816e+00	1.0207262e+00
1.1833233e+00	7.8539717e-01	1.4575437e+00	1.0171483e+00	-2.0739638e-01	-7.6307179e-01	9.2371678e-01	-1.5053453e+00	2.7203961e-01
-1.3082339e+00	-8.0207448e-01	-1.2031613e+00	-1.3363124e+00	1.4568643e+00	-9.6634603e-01	-8.4300900e-01	-1.0924034e+00	1.1722164e+00
5.1917252e-01	1.0836984e-01	9.0062348e-01	-1.5610905e-01	-5.5534109e-02	6.5632952e-01	1.3059559e-01	-5.5600135e-01	5.3043763e-01
1.5297190e+00	-7.5181384e-01	5.8541082e-01	-4.9490727e-01	-3.0875173e-01	7.9847280e-01	-1.0531081e+00	1.5235375e+00	3.4335272e-01
-8.0630151e-01	-2.4960575e-01	-4.6851010e-01	1.0308044e+00	7.2075739e-01	-9.5153583e-01	1.4442994e-01	-1.0267861e+00	9.9064777e-01
1.3212812e+00	-1.0976058e+00	-1.4181108e+00	-1.1544974e+00	-2.1189694e-01	1.3855797e+00	-1.0171981e+00	-4.2581737e-01	1.0594946e+00
-1.1445941e+00	-2.8488361e-02	1.0757106e+00	-1.1610442e+00	1.2142384e+00	-1.1890982e+00	4.9845217e-01	-1.6454073e-01	6.6969025e-01
-1.2216996e+00	-1.2818042e+00	-3.9734480e-01	-1.2381522e+00	-8.1768142e-02	-1.5028264e+00	-1.1420176e+00	-8.3446739e-01	7.1206089e-01
3.4442773e-01	-1.3822826e+00	8.5195459e-01	2.8588174e-01	-1.4011731e+00	4.0087477e-01	1.2408331e+00	-8.2385156e-01	2.6885620e-01
-1.1584409e+00	5.4075422e-02	-5.7845506e-01	1.3192419e+00	-1.3831887e-01	-1.2139825e+00	7.8960546e-01	-1.4743720e+00	5.9836461e-01
-1.4666997e+00	9.2533516e-01	1.1351140e+00	-8.6238505e-01	5.3289625e-02	1.2397750e+00	8.1159475e-01	1.1125126e+00	4.4466132e-01
1.2553666e+00	1.2243287e+00	-1.0307535e+00	1.2030072e+00	2.8482893e-01	-1.2863011e+00	-3.2239228e-01	-7.6016041e-01	9.1167002e-01
1.0455671e-02	-1.3871500e-01	-1.1324420e+00	-3.4824185e-01	-6.6733913e-01	-1.5634895e+00	8.0025583e-01	8.4132116e-01	8.8220873e-01
-2.0072918e-01	-3.2121528e-01	-1.1841049e+00	-1.1371951e-01	-4.8297011e-01	-1.2872457e+00	7.4155502e-01	-2.2374399e-01	9.6633700e-01
4.1517380e-01	-1.4091110e+00	7.3863739e-01	-1.1954797e+00	5.9672115e-01	1.4102912e+00	6.1716766e-01	2.1230632e-02	7.1729528e-01
3.4883747e-01	1.5382684e+00	-1.2956347e+00	1.1999508e+00	1.1286509e+00	-5.5199975e-01	-8.0207779e-01	-1.3183380e+00	1.0508792e+00
6.9947405e-01	1.5106156e+00	-1.3532577e+00	-1.4510372e+00	2.9978397e-01	-3.3672782e-01	5.2704275e-02	3.4566295e-01	1.0421050e+00
2.2057426e-01	-1.4359270e+00	9.2935364e-01	6.0143946e-01	-6.4541956e-01	-1.3761394e+00	-1.2837218e-01	7.5233343e-01	7.1086661e-01
1.1227498e-01	9.0180053e-02	-3.5207663e-01	-1.2521926e+00	3.5285568e-01	-3.6906078e-01	7.2287599e-01	-4.4243984e-01	9.9649974e-01
-1.0915740e+00	1.4084856e+00	1.4087127e+00	-7.1035458e-02	-8.8157831e-01	-1.3006763e+00	8.3793361e-01	6.3481998e-02	7.1254889e-01
8.1649232e-01	5.1601414e-01	1.1914959e+00	-8.7736680e-02	-9.3578453e-01	-1.2653199e+00	-6.0976312e-01	-1.1995603e+00	5.1076492e-01
3.0971217e-01	-1.2876200e+00	9.6005783e-01	-1.1834185e+00	-9.1783744e-01	-7.9142234e-01	-4.1346122e-01	-1.4095805e+00	5.7752368e-01
-2.8654246e-01	1.4024316e+00	4.7204733e-01	-2.9156099e-01	-8.7400324e-01	6.8031530e-02	1.6020449e-01	-6.9091136e-02	7.0779845e-01
1.4246297e-01	-7.0185699e-01	1.1780111e+00	6.1895323e-01	7.1471549e-01	-1.3380195e-01	2.1203787e-01	1.1745566e+00	5.4002553e-01
4.8146586e-01	5.7003398e-01	5.1517954e-01	9.3362279e-01	-1.2270215e+00	5.7094866e-01	1.1544741e+00	-9.9610032e-01	6.2971785e-01
-7.4600642e-01	-1.2965148e+00	3.9316153e-01	-8.5712069e-01	-1.1359536e+00	1.5102031e+00	7.6968873e-01	8.9121734e-02	8.1968760e-01
-3.3563135e-02	-4.3807435e-01	1.0965586e+00	-1.4251720e+00	-5.1409687e-01	1.0569636e+00	-9.2003989e-01	-6.7071570e-01	7.2137300e-01
1.3910705e+00	1.1775093e+00	1.2775217e+00	-1.3637088e+00	-1.0463225e+00	-1.3191736e+00	-1.9136183e-01	-6.8431430e-01	3.8168845e-01
-1.0234627e-02	1.5062800e+00	-1.4787969e+00	1.2059960e+00	1.0932015e+00	-1.1314495e+00	7.7258812e-01	1.0022394e-01	1.1098637e+00
7.7422297e-01	1.0946447e+00	-9.9978219e-01	-3.8108306e-01	1.4029422e+00	-2.1187144e-01	6.8608550e-01	5.7010627e-01	1.1884682e+00
-1.1134141e-01	5.2615179e-01	1.0398713e+00	8.4446334e-01	-1.5442537e+00	-1.4988720e+00	1.3939314e+00	-8.1584344e-02	4.6824855e-01
1.0742193e+00	-5.5010318e-01	4.3666499e-01	-8.2027696e-01	1.5667158e+00	8.8909071e-01	9.4779506e-01	-1.4536711e+00	4.7011848e-01
-3.2991792e-01	1.2308629e-01	2.6798459e-01	-1.0862671e+00	-1.0371614e+00	1.5329170e+00	-1.4247134e+00	3.1603940e-01	7.5637135e-01
-1.9391368e-02	1.5433295e+00	-1.0268987e+00	-1.0963942e+00	1.1256500e+00	-4.6551879e-01	6.1704943e-02	-7.5890651e-01	1.2837972e+00
8.1492149e-01	-1.3911174e+00	8.2368695e-01	1.4849804e+00	1.2933768e-01	-1.4086619e+00	3.4940509e-01	-7.5591547e-02	7.5968388e-01
-9.5856407e-01	-7.7766425e-01	-1.2922115e+00	1.2531891e+00	-2.0381041e-01	-3.3802279e-01	8.1465293e-01	-1.2636951e+00	7.6659481e-01
-4.9922486e-01	-1.1776696e+00	-3.6939920e-01	1.1128017e+00	-1.1055805e+00	-1.1494895e+00	8.1103880e-01	1.3839273e+00	1.0270841e+00
7.2176412e-01	-1.0590581e+00	-7.0526284e-01	9.5683786e-01	1.0298767e+00	1.3247678e+00	-2.4136480e-01	-6.8664472e-01	6.7405624e-01
1.0002836e+00	6.7414778e-01	-1.2344889e-01	-2.3887206e-01	-1.0375888e+00	9.0605655e-01	-8.2206676e-01	-1.3679793e+00	4.4974331e-01
1.1044495e+00	-1.3229458e+00	-1.3543435e+00	2.3272211e-01	2.2635457e-01	7.9280702e-01	2.4844484e-01	-1.4537384e+00	8.9442033e-01
-1.1883659e+00	1.4421374e+00	1.5288160e+00	7.7681486e-02	-1.2748111e-01	1.2130588e+00	4.3579071e-01	-8.1487640e-01	4.4059932e-01
1.3801899e+00	6.1536210e-01	-2.7526962e-01	-1.3098053e+00	-8.8125637e-03	-1.0566037e+00	1.2819595e+00	-1.4252491e+00	7.3660832e-01
-6.6777707e-01	2.6787850e-01	1.1095016e+00	-7.5711917e-01	-4.5790262e-01	1.0851191e+00	8.5121813e-01	4.8235631e-01	5.1179414e-01
-1.5603020e+00	3.3169932e-01	-1.1006768e+00	-1.4517084e+00	9.3271568e-01	6.5205348e-01	-3.8985415e-01	-1.4882183e+00	1.1715637e+00
-1.1213276e+00	-1.4564269e+00	-1.3776235e+00	-1.2553537e+00	-3.9490856e-01	1.1876617e+00	1.0836465e+00	8.7545417e-01	1.0748003e+00
2.6135688e-01	1.1232032e+00	-1.8054162e-01	2.0664987e-01	9.5715874e-01	-6.4995619e-01	1.0348120e+00	-1.4617835e+00	6.7096056e-01
6.7852496e-01	-1.5456670e-01	4.1541417e-01	-1.4370795e+00	-1.1290868e+00	-4.9601840e-01	2.2876875e-01	-9.4124865e-01	5.5268343e-01
-1.2367968e-02	2.9453200e-01	1.2471290e+00	-4.3089753e-01	-1.3429395e+00	1.2057185e+00	-3.9302832e-01	1.4945927e+00	4.1805985e-01
-5.2332426e-01	-9.5067722e-01	-2.0877853e-01	-7.2373979e-01	1.5585348e+00	1.2377015e+00	1.1423331e+00	-5.5564116e-01	8.4235732e-01
9.4857591e-01	1.0827512e-01	2.1830987e-01	3.5203696e-01	-3.0469638e-01	1.5647895e+00	9.1986696e-01	1.2939825e+00	3.4549055e-01
-8.6741044e-01	7.9785180e-01	-2.4625589e-01	1.0662701e+00	-2.3607351e-01	1.1449056e+00	4.2646940e-01	-1.2818246e+00	6.4645063e-01
1.5642078e+00	1.1778362e+00	-1.3452742e+00	1.1568065e+00	1.4399820e-01	1.7279861e-01	-1.4432371e+00	1.4163423e+00	7.1818082e-01
7.9290215e-01	7.1763522e-01	1.8487561e-02	-8.7050783e-01	1.1514848e+00	1.3946532e+00	-2.4859358e-01	6.1765575e-01	9.3832033e-01
-3.2962404e-01	7.2096522e-01	-2.9724048e-01	-2.2818657e-01	7.9412109e-01	5.1322316e-01	2.0594104e-01	1.1181055e+00	1.1093647e+00
-1.3633395e+00	1.3959844e-01	-5.8845203e-01	7.5299801e-01	1.3075924e+00	-1.0717554e+00	-7.8412352e-01	-1.0083704e+00	1.2331559e+00
1.1294230e+00	-5.3869585e-01	-3.7951202e-01	1.3023583e+00	1.2649206e+00	9.0009181e-01	2.1716359e-01	1.2115583e+00	7.9783132e-01
7.0885028e-01	2.0888864e-01	-1.0254109e+00	1.2604635e+00	3.6223535e-01	1.0744640e+00	-6.6214916e-01	-1.1433390e+00	6.5968500e-01
7.2725786e-01	-1.5092683e+00	6.9707853e-01	8.5058882e-01	-3.1696712e-01	6.4107817e-01	-1.2197699e+00	1.0245188e+00	8.4552479e-01
-9.1420524e-01	-1.0536159e+00	7.9978120e-01	-1.5419025e+00	8.7468410e-01	-1.0619799e+00	1.3611188e+00	1.7939860e-02	9.1580479e-01
4.8224977e-01	1.0354848e+00	-9.5227790e-01	2.4165420e-01	1.3035914e+00	-1.3081136e+00	-7.5424528e-01	-7.7663766e-02	9.0196732e-01
-1.3719318e-01	-1.0296732e+00	1.4799376e+00	-5.9716760e-01	-6.4735142e-03	-5.9942921e-01	-2.7411449e-01	-1.5339619e+00	4.7354352e-01
1.2328926e-01	1.3164534e+00	1.3218996e+00	7.9268410e-01	1.1553901e+00	4.8084444e-01	-1.4673957e+00	-1.3878730e+00	6.1069711e-01
-1.3285450e+00	-6.0523838e-01	-1.7616341e-01	-8.5281228e-01	4.5738514e-01	1.3761615e+00	-1.0166563e+00	3.4356740e-01	1.2056343e+00
-1.5565526e+00	2.3554298e-01	-1.3982174e+00	-1.2703431e+00	-2.0509232e-01	7.4182829e-01	1.8072309e-01	8.9973585e-02	1.0537919e+00
-9.3720279e-01	3.6413464e-01	-7.2707812e-01	-3.9262783e-01	-6.5956303e-01	-1.0730921e+00	-5.0705506e-01	1.0799793e+00	8.7182465e-01
3.7821503e-01	1.8845636e-01	7.9347762e-01	-1.5514108e+00	1.4046945e+00	4.2428353e-01	1.0665535e+00	-9.1087147e-01	5.9462760e-01
1.2180319e+00	6.6071906e-01	-8.2436129e-02	6.5729221e-01	-3.6808549e-01	-4.8202196e-01	-3.6362906e-01	-3.5829392e-02	7.3036430e-01
8.4501498e-01	-8.2470585e-01	-6.1666973e-02	1.2703308e+00	-6.1685149e-01	8.2445224e-01	-1.1159742e+00	1.0011909e+00	8.0484864e-01
-9.7364017e-01	-1.2436294e-01	2.8875735e-01	1.8651280e-01	-1.6725881e-01	-9.9646794e-01	-8.6985135e-01	6.4499113e-01	7.9025528e-01
5.8577836e-01	-1.0087734e+00	-6.1581759e-01	-5.8888715e-01	6.0655604e-01	1.9379802e-01	1.3805457e+00	-1.2703211e+00	7.7307578e-01
-5.7456327e-01	7.2159159e-01	1.5016056e+00	-1.4094396e+00	-8.0721433e-02	-6.6834288e-01	-9.7207735e-01	-2.3745108e-02	5.8978985e-01
5.7092130e-01	1.2422264e+00	1.0712921e+00	-8.4324988e-01	4.8290359e-01	1.4965508e+00	-1.4222517e+00	-1.0176841e-01	8.7464378e-01
1.0502984e+00	-9.2492225e-01	7.3927647e-01	-7.7635067e-01	1.4267903e+00	9.3902632e-01	5.9460455e-01	-1.3952708e+00	5.7881953e-01
-2.4468374e-01	-5.6778332e-01	2.0730417e-02	-1.0914219e+00	2.8701976e-01	-1.1462151e+00	1.1238201e-01	-1.4693602e+00	9.0448184e-01
-5.4844852e-02	1.4241467e+00	-3.0065872e-01	2.3128670e-01	-1.5451788e+00	-1.9145589e-01	7.0718105e-01	5.2223248e-01	4.1598439e-01
-1.2907837e+00	-1.6075458e-01	-1.4901644e+00	1.0853991e+00	-1.4157765e+00	-8.0827462e-01	9.4688405e-01	-4.4854441e-01	5.2500695e-01
-1.5036183e+00	-3.2612161e-02	-4.1700765e-01	-9.2567038e-01	-5.3303884e-01	-4.2486477e-01	-1.0281000e+00	1.1364350e+00	6.6697881e-01
-3.4144731e-01	-1.4754606e+00	2.4569948e-01	-5.7533961e-01	1.0385352e+00	1.3793564e-01	-5.1791681e-01	-8.2016805e-01	1.0678830e+00
9.8476386e-01	-1.4748582e+00	1.4183846e+00	8.9420912e-02	-2.8300312e-02	-2.1108239e-01	7.2539993e-01	7.4410718e-01	4.7401726e-01
1.0160338e+00	-7.7612521e-01	3.8499001e-01	1.2159839e+00	-1.2628516e+00	-8.0360998e-01	-7.2442383e-01	-4.7090145e-01	8.2220432e-01
-1.2172114e+00	-4.4369918e-01	-1.1537845e+00	9.8065938e-01	-1.4625729e-01	-5.6612397e-01	1.4217962e+00	-7.6878095e-01	8.1373665e-01
3.8010263e-01	8.8880715e-01	1.3956008e+00	1.1471015e+00	-1.4207885e+00	1.0385319e+00	1.1758139e+00	4.6911331e-01	5.1755994e-01
1.5269540e+00	-9.1313533e-02	7.3237329e-01	-6.1999375e-01	5.3725306e-02	-8.3326609e-02	1.2856958e+00	-1.0102178e+00	4.2074982e-01
-1.5435714e-01	1.5322540e+00	2.3786653e-01	4.2794645e-01	1.3241243e+00	6.8000401e-01	8.1563114e-01	-1.5637656e+00	3.2101238e-01
6.7508953e-01	9.5878884e-01	-1.4246673e+00	1.3903423e+00	-4.8539805e-01	-2.8672127e-01	1.5438661e+00	3.5617534e-01	6.1709625e-01
-1.2029807e+00	1.1353178e+00	8.3509734e-01	3.1721057e-01	6.3114808e-01	2.7882808e-01	1.3430518e+00	1.5050123e+00	5.2628724e-01
7.9317299e-01	-7.4714357e-01	-1.1550218e+00	7.5240705e-02	-1.4525746e+00	-9.9266798e-01	3.2900486e-01	-1.3623112e+00	4.6156962e-01
1.0807465e+00	-2.9617940e-01	-5.5065294e-01	-1.4913037e+00	-1.0418183e-01	1.2278062e+00	3.8153334e-01	-4.3661396e-01	8.4313701e-01
-5.8294314e-01	1.5372192e+00	3.0806873e-01	-7.1466076e-01	-1.1169628e+00	-1.3834257e+00	4.4021292e-01	5.8954542e-01	6.7608719e-01
1.1021683e+00	-4.1565290e-01	3.6638510e-01	-9.9468785e-01	1.3633856e+00	-3.0893064e-01	2.0778990e-01	-9.3276790e-02	7.9824362e-01
1.3125816e+00	1.0238328e+00	3.1269520e-01	-1.3042225e+00	-3.5551423e-01	8.5537681e-01	-1.1261984e+00	-4.8272154e-02	6.1030133e-01
2.9528353e-01	1.0542359e+00	-4.1630666e-01	-1.1763336e+00	1.8153864e-01	3.8998719e-01	7.8535503e-02	-7.7919414e-01	9.2041084e-01
-8.8605389e-01	-4.0155654e-02	-5.3914259e-01	-5.9551888e-01	6.3343319e-01	1.1523684e+00	4.7727886e-01	1.3839427e+00	1.0491978e+00
-7.5860749e-01	5.4634816e-01	-1.0162864e+00	2.2831987e-01	-7.4596179e-01	-6.2397000e-02	1.1398092e+00	-4.2715073e-01	6.5632625e-01
-1.3330171e+00	-4.0177372e-01	1.1307523e-01	1.4874427e+00	7.1647136e-01	5.8556681e-01	-6.5823725e-01	-5.8315903e-01	8.5080070e-01
-1.3215463e+00	-1.3282256e+00	-2.0812104e-01	-1.3453002e+00	9.4838631e-03	-9.8833819e-01	-1.4456910e+00	6.1522170e-01	5.6687164e-01
-1.6838622e-01	6.6918077e-01	-1.2977328e+00	-4.1798555e-01	-8.2593798e-01	-1.3996147e+00	-6.5167243e-01	1.0496347e+00	9.7229090e-01
5.0783848e-01	1.9532457e-02	1.0818164e+00	-4.8201362e-01	1.1583591e+00	9.2212123e-01	-1.0665039e+00	1.1678958e+00	6.7129733e-01
-4.6582943e-01	1.5563726e+00	-1.4496691e+00	9.6450129e-01	9.1534035e-02	6.1493017e-01	1.1960555e+00	1.5328235e-01	7.4028778e-01
-3.4638542e-01	1.0541931e+00	-1.5374153e+00	-2.4486934e-01	-9.6788213e-01	-7.0849805e-01	-9.4693575e-01	1.1047387e-01	1.0859526e+00
-3.2862910e-01	-7.5837423e-01	2.6137196e-01	-3.2662991e-02	-2.8269658e-02	-1.0905430e+00	1.5918613e-01	5.3053787e-02	9.3670767e-01
-3.4940608e-01	-5.5424426e-01	9.3204424e-01	8.1182301e-01	-7.4765003e-01	-7.0437780e-01	-1.1956114e+00	-5.3731586e-01	8.1528186e-01
-8.3134768e-01	-3.6114236e-01	8.8654707e-01	3.7243966e-01	6.1656147e-01	-9.5653532e-01	-1.0146978e+00	1.4112506e+00	4.9661776e-01
1.3435969e+00	-1.6270612e-01	-3.7731198e-01	1.5407209e+00	-1.5655491e+00	-9.5949491e-01	-1.4610633e+00	-1.3612692e-01	1.0441904e+00
6.5392350e-02	-1.4161206e+00	1.3931435e+00	-1.2526084e+00	-1.3447097e+00	-4.3581815e-01	-1.4034812e+00	-8.0574082e-01	6.5781711e-01
-5.0820790e-01	-3.3220632e-02	2.7294043e-01	-7.7759137e-01	8.2229890e-02	1.3984498e+00	-1.2312467e+00	1.3199411e+00	8.3204989e-01
5.4023879e-01	8.6432927e-01	5.8456567e-01	4.7267912e-02	-2.6300370e-01	1.4914920e+00	1.0685589e-01	1.4640986e+00	6.1397343e-01
5.9060683e-01	5.7540342e-02	1.0349235e+00	-3.9113890e-01	-8.2344811e-02	7.3848167e-01	-1.0641127e+00	-9.8981525e-01	6.7411768e-01
-1.1038137e+00	-5.3001466e-01	-1.0393235e+00	1.4820139e+00	1.4731192e+00	-7.7113500e-01	5.4534877e-01	-1.0918719e+00	1.0898824e+00
-6.9144538e-01	-1.5412803e+00	-6.5572537e-01	-1.4813687e+00	-1.7679064e-01	-1.3963218e+00	-1.4905262e+00	-1.0477099e+00	7.5551721e-01
-3.7122672e-01	1.2750445e+00	-6.9251574e-02	-2.4248554e-01	6.2643745e-01	-2.8361454e-01	-2.1408066e-01	-2.3347369e-01	1.1021733e+00
-4.4351470e-03	8.6885318e-01	-1.5219287e+00	-8.0883851e-01	1.0571799e+00	-9.1345430e-01	-9.3002049e-01	-1.4316536e-01	8.2370494e-01
8.5670756e-01	6.9275109e-01	-2.0826950e-01	-4.7737072e-01	-8.2467870e-01	5.3686607e-01	-1.4308564e+00	2.7972326e-01	6.3425404e-01
7.6486475e-01	3.2517032e-01	-6.5130494e-01	4.5797369e-01	3.3190292e-01	4.5400091e-01	4.8843089e-01	1.4862526e+00	7.9881508e-01
-3.1530661e-01	-1.2336932e+00	-1.1732701e+00	2.6183196e-01	-1.1761116e+00	-5.3532295e-01	7.6333237e-02	6.4376476e-01	9.5547662e-01
5.0868992e-01	-1.6974608e-01	6.2595919e-01	-7.6151438e-01	-7.3710861e-03	3.4849421e-01	1.1629199e+00	1.0922553e-01	5.6323274e-01
1.2778336e+00	-3.5615352e-01	-6.9762939e-01	7.6342068e-02	-1.3637306e+00	1.2134053e+00	1.3472536e+00	1.0633981e+00	8.1270169e-01
6.2146766e-01	-1.1382687e+00	-6.3331298e-01	1.3113286e+00	8.3947365e-01	-1.5159758e+00	-1.3091433e+00	1.1274308e-02	6.0421040e-01
-7.8865022e-01	1.4177538e+00	-3.7531995e-01	1.2281534e+00	1.4102498e-01	-6.8952585e-01	9.4381531e-01	9.9173654e-01	7.9963783e-01
-4.6476296e-01	-7.9179318e-01	3.1558561e-01	1.3100803e+00	1.4459591e+00	4.7433698e-01	8.0268900e-01	-1.1746524e+00	9.4393887e-02
-1.2716537e+00	1.1846831e-01	1.0389267e+00	-9.0282450e-01	-1.1266343e+00	-1.1804778e+00	7.9512591e-01	-6.1419337e-01	7.0775132e-01
-4.2815197e-01	-6.7291606e-01	2.6890224e-01	1.2110483e-01	-9.6439877e-01	-1.1332740e+00	-6.5400442e-01	5.2550303e-01	8.5573449e-01
1.4385291e+00	3.3265614e-02	-1.3118858e+00	-3.4323435e-01	-1.1736478e+00	5.3992565e-01	5.8033119e-01	1.1125288e+00	4.5142666e-01
-3.3898749e-01	-1.0832007e-01	-1.1679021e+00	-7.7557316e-01	5.6105711e-01	-1.5308273e+00	-1.0188332e+00	-4.8778270e-01	7.9247519e-01
1.4863639e+00	-1.5532217e+00	-2.6026154e-01	-5.9012879e-01	-1.3742327e+00	1.0285707e+00	1.2925106e+00	1.3930384e+00	8.2116410e-01
-6.2717966e-01	-1.5043335e+00	-1.1186619e+00	-2.8651023e-01	2.5979077e-01	-9.9694157e-01	-8.8726417e-01	-1.4937037e+00	1.1136525e+00
-9.6520698e-01	2.0376728e-01	1.0818250e+00	6.8404663e-01	-5.1028525e-01	-1.4833156e+00	8.9142368e-01	-2.1074002e-01	6.1792941e-01
9.5068794e-01	3.8062497e-01	-1.3059319e+00	-1.4573384e+00	1.8376910e-01	-1.5469705e+00	-9.7567608e-02	-1.3326133e+00	8.0768675e-01
7.2023285e-02	8.8120624e-01	1.5096453e+00	1.5110142e+00	4.2166247e-01	-1.1288048e-01	9.2585356e-02	-8.1714686e-01	3.3078957e-01
9.8217602e-01	9.6556801e-01	1.1055605e+00	-1.0185910e+00	-5.5193923e-01	3.3973252e-01	9.9371823e-01	1.2558001e+00	6.0730125e-01
1.5045425e+00	-1.1661298e+00	-1.3654929e+00	-9.2133495e-01	6.8054565e-01	-1.5310064e+00	7.1577171e-01	1.0131652e+00	9.9583277e-01
1.6646360e-01	1.2521867e+00	-5.0433052e-01	3.3739027e-02	-6.0818760e-01	1.1616657e+00	8.1679869e-01	8.3500644e-01	6.1381898e-01
-1.4053551e+00	-2.7657820e-02	-2.6608931e-01	1.5651546e+00	9.3344509e-01	-8.8308145e-01	-8.2430992e-01	4.5889035e-01	1.0111786e+00
-1.3091715e+00	1.1072809e-01	1.4648547e+00	9.9801295e-01	-7.0202008e-01	-1.0661868e+00	2.4672434e-01	-3.9800751e-02	6.1936281e-01
4.7011708e-01	1.1841621e+00	-8.4818462e-01	6.4046384e-01	9.7049090e-01	2.4329070e-01	-2.0626836e-01	2.2800855e-01	1.0779619e+00
1.5229649e-01	2.2360979e-01	1.1085473e+00	1.1793625e+00	-1.0851820e-01	-1.3669092e+00	1.5660314e+00	-6.0325742e-01	2.1029221e-01
-7.5096936e-01	8.6484934e-01	-1.4322645e+00	1.2380652e+00	1.3999137e+00	8.2341493e-01	2.6598572e-02	-1.0280176e+00	9.7338199e-01
1.3772186e+00	-6.2629310e-01	-1.1865229e+00	1.3943177e+00	9.6197209e-01	4.1916869e-01	9.3605040e-01	8.6821479e-01	1.0113310e+00
-3.4202779e-01	1.3689192e+00	9.4055276e-01	1.1578604e+00	1.2290969e+00	1.5174322e+00	-8.9693223e-01	-6.1183670e-01	4.0211500e-01
6.5348751e-01	1.5414942e+00	-6.2401482e-01	1.1340219e+00	1.4595502e+00	3.3578213e-02	-1.3785068e+00	-7.0669247e-01	1.2185121e+00
1.5658615e-01	-8.2212662e-01	-1.1808832e+00	-5.3664755e-01	1.1039432e+00	-1.1376496e+00	6.8153319e-01	9.8146219e-01	1.1428732e+00
-9.1125081e-01	-7.5764142e-01	1.4778813e+00	7.7153613e-02	-2.7309256e-01	-7.4380293e-01	2.8148181e-01	-1.0679859e+00	6.1638200e-01
-1.2819545e-01	-8.0436251e-01	1.3195111e+00	-7.5699734e-01	2.4656094e-04	-6.9864924e-01	-3.7381545e-01	1.4210621e+00	6.1089673e-01
5.5169531e-01	-6.4754040e-01	5.2098863e-01	5.9589432e-01	1.0023571e+00	1.0755268e+00	4.6900153e-01	1.4040003e+00	3.8269019e-01
1.5030822e+00	-7.3449503e-01	6.3725822e-01	-2.0147888e-01	1.3966973e+00	-3.4563363e-01	2.5280953e-01	5.3000552e-01	6.2184644e-01
7.5550929e-01	-1.3404613e+00	7.0947210e-01	3.8140750e-01	3.1040636e-01	-2.5965383e-01	1.5364671e+00	1.3875853e+00	5.3149142e-01
-4.7287564e-01	-7.7286306e-01	-1.3881732e+00	1.4668091e+00	-1.1857645e+00	-3.2976737e-01	-4.8902928e-01	1.1040407e+00	1.0843944e+00
6.0856946e-01	9.7621856e-01	-1.5596794e+00	5.8309689e-01	1.1202199e+00	-6.3070867e-01	-7.0880357e-01	1.3652306e+00	6.6185549e-01
-7.9873977e-01	-1.2331699e+00	-8.2528135e-02	1.4819040e+00	-2.9080688e-02	-5.8692686e-01	5.7665964e-02	-7.6178650e-01	7.3991117e-01
-3.9392430e-01	-8.0027432e-01	1.5335835e+00	-1.8645173e-01	1.3293307e+00	1.2122360e-01	-1.5602744e+00	-1.3556160e+00	6.1571662e-01
-1.3499137e+00	-1.0524118e+00	1.3111199e+00	-1.5263102e+00	-9.4620578e-01	-1.4885870e+00	-6.5721840e-01	-1.0090073e+00	4.2139187e-01
5.8191009e-01	-7.1850128e-01	8.6097132e-01	1.5507046e+00	-1.3858223e-01	9.6178835e-01	-2.9903348e-02	-6.8688105e-02	3.3977913e-01
3.8496808e-01	4.3109179e-01	1.6926579e-01	3.9552043e-02	-1.2314154e+00	1.2826029e+00	6.9249987e-02	-1.4764793e+00	6.2198833e-01
-1.5223968e+00	8.4699160e-01	-1.4328567e+00	-1.2664475e+00	4.1434836e-01	-9.0159994e-01	1.4952515e+00	2.5286455e-01	1.2928892e+00
1.3499854e+00	8.3151528e-01	1.4268249e+00	-8.9304120e-01	-9.5800820e-01	-1.2888563e+00	1.0926274e+00	-6.8039855e-01	3.7259327e-01
6.2244787e-01	1.4731201e+00	8.6895113e-01	1.1863044e+00	-5.8145712e-01	-5.2636521e-01	1.1798007e+00	-6.1106463e-02	3.1285841e-01
-2.2187586e-02	-1.6275131e-01	-8.0260129e-01	-1.4702320e+00	9.4497333e-01	1.0480738e-01	-8.2287628e-01	2.8446672e-01	1.1034458e+00
9.4276373e-01	9.6597145e-01	6.7892975e-01	-1.5637098e+00	1.4159196e+00	-9.3577069e-01	-7.9074387e-01	-4.7181291e-01	4.3478632e-01
-1.1633371e+00	-6.6868862e-01	5.0784107e-01	1.2930730e+00	-2.0283754e-01	-6.8511899e-01	-1.0953315e+00	-3.7966675e-01	1.0795296e+00
1.0664414e+00	-1.1726876e+00	-4.2238374e-01	-8.5929631e-01	-4.6254589e-01	-8.5777763e-01	4.9694086e-01	-4.8443772e-01	9.2531962e-01
8.9499714e-01	9.9192817e-01	9.9592805e-01	-2.9164935e-01	1.4330473e+00	1.0014010e-01	-1.4097889e+00	1.0634206e+00	5.4966685e-01
2.7126088e-01	-1.0953872e+00	1.5707469e-01	-8.6614212e-01	-1.3650658e+00	-8.3903902e-01	-4.3056895e-01	3.8969689e-01	5.2891837e-01
6.3060578e-01	-4.3941592e-01	1.0165053e+00	8.8982385e-01	3.8997374e-01	8.8064131e-01	-1.4843797e+00	-5.8503726e-01	5.1966349e-01
-1.1423200e+00	6.2098101e-01	4.2437363e-01	1.2883801e+00	9.2638689e-01	8.9553134e-01	-5.8228891e-01	4.6373188e-01	7.0472543e-01
-6.9983553e-01	4.5697762e-01	1.0322093e+00	-1.1946366e+00	5.1294650e-02	-1.7518253e-01	-4.6865483e-01	-3.4973274e-01	8.1587160e-01
-1.2828168e-02	-7.7115661e-01	4.6700366e-01	-3.3925723e-01	1.3127943e+00	-6.2039547e-01	-7.0888699e-01	-3.8252593e-02	8.4134937e-01
1.1668659e+00	1.3821415e+00	1.2320921e+00	9.4458409e-02	7.2897414e-01	-4.0678511e-02	-1.3442753e+00	1.1151576e+00	5.4213496e-01
-1.4477704e+00	7.1669028e-01	1.5353355e+00	1.0581937e+00	-3.4303126e-01	1.1834658e+00	1.1002081e+00	-2.8770045e-01	7.5914550e-01
-1.0415808e+00	5.4737529e-01	-6.5865651e-01	5.0591412e-01	-5.0378969e-01	1.0865656e+00	-2.1697521e-01	-4.7037429e-01	6.2464728e-01
-8.9424581e-01	1.1532516e+00	9.3247536e-01	-1.3927032e+00	-6.0107865e-01	-1.7020241e-01	6.8678145e-01	-1.3335383e+00	5.6586440e-01
-2.1003060e-01	-9.2619292e-01	-1.2923396e+00	8.4390316e-01	1.0331609e+00	1.3989716e+00	5.2443533e-01	-6.5571073e-01	5.7042338e-01
1.1659075e+00	6.7162640e-02	6.2078325e-01	-8.1045419e-01	7.5273610e-01	8.3627815e-01	-1.1243506e+00	1.7684235e-01	8.0100179e-01
1.2937099e+00	9.7072787e-01	2.7491308e-01	6.4212476e-01	4.2043906e-02	-1.5864783e-01	-2.8016041e-01	2.4277152e-01	9.2077752e-01
4.1930274e-01	7.3273089e-01	-8.1867514e-01	8.2005609e-01	-2.2641099e-01	8.1811072e-01	5.9140829e-01	-6.6797923e-01	6.3537678e-01
6.2886890e-01	-3.5084987e-02	7.0279198e-01	5.1574838e-01	-8.2087426e-01	-7.6422310e-01	-2.0010077e-01	1.3252922e+00	6.6744774e-01
1.0818608e+00	9.4604965e-01	-5.6361286e-01	5.2889537e-01	1.4412957e+00	-1.4669424e+00	1.5521502e+00	2.9473095e-01	1.0905239e+00
-7.0381443e-01	6.5597618e-01	-7.3948044e-01	-1.5626689e+00	-9.6486936e-01	3.1788297e-01	-7.9674318e-01	-7.4850029e-01	6.8420967e-01
-9.1285620e-01	1.1430470e+00	-3.0724166e-01	-6.2423134e-02	3.4202192e-01	-1.1900365e+00	-1.3946716e+00	-1.1074071e+00	8.3066285e-01
1.1644190e+00	3.5208126e-01	9.6777703e-01	1.4633993e-01	-7.5213161e-01	-1.5646918e+00	-8.2253094e-01	-1.3968735e+00	5.3154659e-01
1.4087869e+00	-1.3308940e+00	1.4032920e+00	-3.3189420e-01	6.9288156e-01	4.9626973e-01	-1.2699088e+00	-1.3113646e-01	5.6828265e-01
-7.0263732e-01	-1.9529853e-01	1.1920588e+00	1.3226517e+00	-6.2358259e-01	-1.2309620e-01	6.2372761e-01	1.3874828e+00	5.3090696e-01
2.1410361e-02	5.8197642e-01	9.9572150e-01	-1.0190188e-01	-1.9956464e-01	1.4316844e+00	-5.0476627e-01	-6.1891187e-01	3.1027944e-01
-1.4392132e+00	1.4998284e+00	-1.7278390e-01	-4.9697099e-01	1.1379899e+00	8.6171295e-01	-1.3066140e+00	-2.3856542e-01	1.0911547e+00
1.4076403e+00	-5.2359719e-01	-1.1473299e+00	9.0343880e-01	1.8000866e-01	6.7482506e-02	-5.2943788e-01	-8.9672675e-01	9.8745903e-01
-1.1229809e+00	-4.9688062e-01	-7.7764075e-02	7.7862907e-01	5.1879229e-02	6.3523290e-02	-1.2719884e+00	-1.0665724e+00	9.2602982e-01
7.4903343e-01	-7.1922643e-01	-7.8268748e-02	-1.4561676e+00	-1.4285547e+00	-5.0556016e-01	2.2828710e-01	4.6059960e-02	4.4181326e-01
6.4306421e-01	8.0985060e-01	8.6446858e-01	-8.0257801e-01	1.4737403e+00	1.0584802e+00	9.3668796e-01	1.2979614e+00	7.2273517e-01
9.0139460e-01	-1.3619536e+00	-7.4258256e-01	1.0703098e+00	8.3675771e-01	-9.6185550e-01	3.9371458e-01	-3.8157529e-01	1.2818063e+00
9.7933137e-01	-7.1084402e-01	9.6256437e-01	-6.2321357e-02	-1.5234993e+00	7.3040973e-01	9.6677455e-01	-1.1452527e+00	3.8608928e-01
8.1847253e-01	3.2143460e-01	-1.3828248e+00	-1.2846922e+00	-1.4727593e+00	-1.3478230e+00	2.6268494e-01	2.7577973e-01	6.2594613e-01
-9.6633871e-01	-1.1880992e+00	3.6622319e-01	3.4498992e-01	-5.7165481e-02	1.1635254e+00	1.0081128e+00	1.1808184e+00	5.6568331e-01
7.7926584e-01	-4.1995031e-01	7.3309239e-01	-1.1344808e+00	5.4711910e-01	-1.0435057e+00	7.4230154e-01	5.7324160e-01	7.5094238e-01
-1.7874877e-01	1.0537771e+00	-2.4258521e-01	-8.9255265e-01	-1.0951160e-02	1.3121626e+00	5.9753043e-01	-7.9311195e-01	6.1829929e-01
-8.6793498e-01	-1.4672905e+00	6.5769760e-01	-2.7384563e-02	1.2978254e+00	-4.6415959e-01	-9.7780991e-01	-5.4916626e-02	9.8370964e-01
-9.6854259e-01	7.5060253e-01	-1.3409720e+00	1.5617659e+00	4.7293464e-01	-5.5558662e-01	-3.7994269e-01	6.4450864e-01	1.0143684e+00
1.4378609e+00	-1.2593881e+00	6.9091076e-02	5.9325832e-01	3.8308408e-01	-9.3094776e-01	1.1609995e+00	4.5306637e-02	9.4335413e-01
9.9766655e-01	1.5153245e+00	-1.1755646e+00	-5.2243211e-01	1.3707339e+00	-1.3075305e+00	4.8615072e-01	1.2032187e+00	1.0141691e+00
1.1017046e+00	-8.3243794e-01	-2.3870051e-01	2.3493441e-01	6.2594590e-01	-2.2475634e-01	-5.4742046e-01	6.4992146e-02	1.0116019e+00
-1.9741235e-01	-1.2724181e+00	-2.5718771e-02	-4.3934012e-01	-9.2107844e-01	-1.2854634e+00	1.2292830e+00	-9.5123752e-01	7.9591227e-01
-3.8747835e-01	-7.0933992e-01	1.2844088e+00	-1.2465980e+00	1.2032035e+00	-5.0110822e-02	1.4458263e+00	1.1608173e-01	6.3792046e-01
1.7290493e-01	4.6808902e-01	1.1761095e+00	-2.9062584e-01	-1.9049412e-01	-2.6574598e-01	-2.1640967e-01	5.6641999e-02	6.8790956e-01
3.9939951e-02	6.2422090e-01	-2.8993478e-02	6.2802977e-01	-3.5168528e-01	9.5200528e-01	7.6697266e-01	7.9499772e-02	3.4611219e-01
-1.0300738e+00	1.5027510e+00	-3.4651681e-01	-4.5494955e-01	-1.4387017e+00	2.2128811e-01	5.5484021e-01	9.7578949e-01	4.8331629e-01
8.6594923e-01	1.4720396e+00	6.0480595e-01	2.9940431e-01	5.7965178e-01	-4.5642045e-01	9.5242903e-01	9.8026180e-01	9.8830248e-01
-9.9008656e-01	5.2807736e-01	-1.2203038e+00	-7.4319481e-01	1.2862187e-01	7.1080702e-01	1.0601973e+00	7.4818139e-01	9.8162372e-01
6.3143319e-01	3.9693216e-01	-1.3289163e+00	9.7154291e-02	3.3206102e-01	-9.4332027e-01	-3.7806825e-01	-1.1107779e+00	9.3773824e-01
1.9769387e-01	-1.5039268e+00	-1.5143034e+00	-7.5601521e-01	1.4810094e+00	1.2343575e+00	1.2488329e+00	-1.5010488e+00	6.5760763e-01
-1.1641338e+00	7.5709536e-01	-8.5454373e-01	1.3946892e+00	4.8657161e-01	-1.2306873e+00	1.5345288e-01	-1.1386491e+00	9.4132234e-01
2.4162907e-01	1.0514524e+00	1.0451057e+00	1.1186845e+00	2.4339601e-01	8.4149395e-02	-1.6493223e-01	1.3071932e+00	5.9768046e-01
-1.0194784e+00	3.0139909e-01	4.4618703e-01	-7.0094367e-01	4.0312790e-01	5.8219119e-01	-1.1312028e+00	8.3856110e-01	8.3769643e-01
-1.2795695e-01	1.3671623e+00	8.3688150e-02	2.1226854e-01	-1.0446752e+00	-1.1737744e+00	7.9352223e-01	5.1179708e-01	6.4781750e-01
1.4185152e+00	2.8883499e-01	-8.8676661e-01	-1.2518898e+00	5.0444666e-01	-1.5664051e+00	6.6725414e-01	9.2829020e-02	7.6407131e-01
-5.6243519e-01	6.8895476e-01	-1.7085693e-01	-1.2651734e+00	-9.2359420e-01	-2.3959438e-02	-9.4540241e-01	-1.1942124e+00	5.2748335e-01
2.0405552e-01	-6.4786145e-01	-1.7669078e-01	-1.4705021e+00	-2.3841679e-01	-5.6240666e-01	7.9731538e-01	5.0840500e-01	8.2602338e-01
-1.0581317e+00	1.5279387e-01	-8.3682855e-01	1.7997807e-01	-1.5403271e+00	6.8363010e-01	-1.5546119e+00	-3.6926311e-01	6.9977459e-01
5.3688093e-01	1.3253430e+00	3.3278728e-01	-4.6228964e-01	-1.5545811e+00	9.6680616e-01	2.6330265e-01	-1.5595269e+00	7.9281676e-01
7.0365999e-01	1.1485237e+00	1.1208877e+00	-5.4333448e-01	7.8093833e-01	7.9389278e-01	-1.1763593e+00	-6.6099685e-01	7.7162633e-01
1.4586484e+00	1.2925713e+00	-1.3708243e+00	7.8730940e-01	-3.4366830e-01	6.1199826e-01	-1.0282056e+00	-7.0240498e-01	6.3807941e-01
-1.4848087e+00	1.3293518e-01	9.9669475e-01	-7.9201223e-02	1.3557863e+00	2.8044351e-01	8.5036859e-01	7.8464407e-01	5.6007983e-01
-1.5089746e+00	5.6923270e-01	4.7661877e-01	9.0033756e-01	7.2856082e-01	1.0251018e+00	1.0398914e+00	-8.9312911e-01	3.5920526e-01
7.4134859e-01	9.4429082e-01	-5.2962897e-01	-1.0785035e+00	-1.0063873e+00	3.9244062e-01	7.7520703e-01	-2.9119346e-01	7.2669822e-01
2.8932523e-01	-6.3022003e-01	-1.3421318e+00	5.8053297e-01	-1.7260458e-02	1.5465467e+00	7.1976114e-01	5.1285089e-01	7.4853893e-01
-4.9631134e-01	1.3423783e+00	-5.7317713e-01	-7.6907989e-01	-1.0699880e+00	-7.2730721e-01	-1.2478114e+00	-1.0454141e+00	7.0772348e-01
-5.7623935e-01	-1.5665378e+00	-1.2649937e+00	-1.4134802e+00	-8.1149372e-01	8.4680118e-02	1.3064444e+00	6.5304409e-01	9.0203247e-01
6.7535616e-01	8.8673239e-01	1.5494040e+00	3.6213367e-01	-1.1212777e+00	7.7279274e-02	8.1922752e-01	-1.0127021e+00	3.1602572e-01
1.3675056e-01	-4.0428836e-01	1.7146717e-01	1.1155648e+00	1.1005202e+00	1.3549995e+00	-8.4366486e-01	6.6520177e-01	7.2446789e-01
-1.2792020e+00	3.9050680e-01	1.0082688e+00	2.7258583e-01	-1.2544677e+00	7.1015627e-02	-1.4676625e+00	-8.8209374e-01	7.2962804e-01
1.5118795e+00	4.6079001e-01	2.2259639e-01	9.0792107e-01	-6.1038107e-01	-2.4556827e-01	7.8223005e-01	-1.7381277e-01	4.1428545e-01
9.5751995e-01	4.7181873e-01	-4.5937537e-01	7.1398793e-01	-1.3746879e+00	7.8677336e-01	-6.2482812e-01	4.0992938e-01	4.7813335e-01
-1.3412832e+00	4.7749948e-01	1.3128434e+00	-8.8875790e-01	-1.1066135e+00	3.3633599e-01	8.5803639e-01	1.7037634e-01	4.8489503e-01
1.1216310e+00	-1.4355183e+00	1.5536064e+00	9.1906837e-01	-6.2541551e-01	1.0737735e+00	1.1073609e+00	1.5242082e+00	4.4810065e-01
-1.4456599e+00	6.7569286e-01	-1.4555429e+00	-4.2900327e-01	4.1046228e-01	-1.5389146e+00	6.1949798e-01	8.2132774e-01	1.0322661e+00
-1.2884884e-01	-4.8747920e-01	2.7187299e-01	-3.0289649e-01	-2.9790055e-01	1.9509330e-01	6.6442897e-01	-1.0287164e-01	8.1017456e-01
-1.0051578e+00	2.1067774e-01	1.4936555e+00	-1.4012809e+00	8.8407123e-01	-8.8960812e-01	-1.3041421e+00	-1.0877084e+00	6.7812435e-01
-1.3436986e+00	2.8585967e-01	-5.9928740e-01	1.1926676e+00	-1.1480196e+00	-8.0431014e-01	1.7525294e-01	-1.8813207e-01	7.9943810e-01
1.3665495e+00	9.4829384e-01	-2.7723424e-01	-1.3375527e+00	8.9664580e-01	2.3260990e-01	-1.3377138e+00	-1.4934980e+00	9.6113359e-01
-5.8682798e-01	6.7507987e-01	-4.9396452e-01	9.8877678e-01	-2.9401308e-01	1.3333080e+00	1.4226478e+00	1.0441538e-01	7.0606630e-01
-1.3585405e+00	-1.3652321e+00	1.1676363e+00	-6.5387691e-01	2.4741984e-01	-7.2141906e-02	-2.2032092e-01	-1.2409641e+00	7.1041219e-01
1.0596857e-01	7.3705171e-01	-1.0654304e+00	-4.1813717e-01	-1.0834356e+00	1.6575832e-01	1.0040073e+00	1.5000099e-01	5.8109674e-01
-2.6933320e-01	3.2826853e-01	3.8897823e-01	1.1140415e-01	-6.3111788e-01	-6.9260287e-01	8.5571551e-01	1.5093180e+00	6.7425012e-01
3.5195816e-01	5.7247004e-01	-9.7233933e-02	-1.9720672e-02	-1.1814632e+00	-9.7558137e-01	-2.0053343e-01	-1.2529441e+00	5.2175658e-01
-2.5817207e-01	-1.1943349e+00	-5.8254004e-01	1.5634890e+00	1.1552351e+00	-6.2394732e-01	5.6348003e-01	-1.3585548e-01	1.1455384e+00
-5.5860964e-01	-1.5515160e+00	-1.5477611e+00	1.2793532e+00	9.9339165e-01	-4.6254754e-02	-1.4929448e+00	6.1483339e-01	9.8318950e-01
-1.4733502e+00	-1.1103354e+00	-8.3388541e-01	1.0287471e+00	1.5101453e+00	-1.4302614e+00	-2.2664045e-02	8.0657332e-01	1.1028939e+00
-5.6325728e-01	-3.4653755e-01	-4.6720115e-01	-1.1737036e+00	8.5594558e-02	1.0644243e+00	-7.8190162e-01	1.0546437e-01	1.1220769e+00
-1.0464361e+00	2.5618313e-01	-1.4097556e+00	-3.7544719e-01	-2.6170149e-01	1.5502934e+00	-1.3841803e-01	6.8144417e-01	8.1294526e-01
-8.1661429e-01	-1.4537181e+00	1.3014361e-01	1.3187010e+00	-1.8728771e-01	-5.8889013e-01	1.5282838e+00	-1.2147024e+00	4.7725232e-01
7.8186816e-01	-4.7397398e-01	7.7523785e-01	-5.2911682e-01	1.3131017e-01	-1.4595731e+00	2.0348145e-01	-1.4340530e+00	5.9815804e-01
-4.2396646e-01	9.9827790e-01	1.2378640e+00	9.8236449e-01	1.5319844e+00	-1.4890043e+00	-1.2816912e+00	1.7034222e-01	5.7826649e-01
-4.7216889e-01	-1.1896237e+00	1.1532191e+00	1.5305517e+00	-4.3218231e-01	2.3130903e-01	5.1639512e-01	9.5078406e-01	3.8426349e-01
-7.9497134e-02	-9.0991671e-01	-1.4727678e+00	6.2131680e-01	-3.2581506e-01	1.4607483e+00	-1.1677654e+00	-1.4541124e+00	7.3514622e-01
-9.3145865e-01	3.0288860e-01	-1.9996831e-01	-1.8244707e-01	-1.7765251e-01	-7.5013769e-01	-1.1035351e+00	-8.1703178e-01	8.7450839e-01
-4.6933823e-01	1.2686326e+00	6.3673763e-01	-1.9344794e-01	-1.2927540e+00	-3.5276207e-01	8.4886881e-01	4.8364602e-02	3.8122592e-01
3.7146941e-01	-8.1696915e-02	1.3848229e+00	2.6893906e-01	-6.2316411e-02	-6.8682283e-01	9.6589236e-01	-8.0863095e-01	2.4216368e-01
9.4172210e-01	-2.0406842e-01	-1.3410063e+00	-6.9299980e-01	-1.2015626e+00	-1.2198615e+00	1.1436674e+00	-1.3049774e-01	3.2605453e-01
1.7947208e-01	8.4132118e-01	-5.0760320e-01	-1.3637322e+00	-5.0555950e-01	-1.7878157e-01	1.3534589e+00	-4.4391617e-01	8.9220632e-01
4.5822080e-01	-2.2339976e-01	1.2785819e+00	8.1279647e-01	1.0696429e+00	-1.4192306e+00	-6.8859930e-01	3.8346926e-01	5.2090966e-01
1.2734462e+00	-4.7662059e-01	6.3204817e-01	1.0253829e+00	1.2942975e+00	1.1040109e+00	3.3896335e-01	1.5612769e+00	4.5544494e-01
-8.6028674e-01	4.9899324e-01	1.1088854e+00	-1.1671378e+00	8.7120421e-01	8.6441263e-01	1.2495389e+00	-1.3423658e+00	3.4767865e-01
-1.2299032e+00	-1.4729992e+00	1.1098824e+00	1.8811904e-02	-6.3417914e-01	1.4586702e+00	-5.4621890e-01	-1.3643174e+00	2.8265460e-01
6.9662614e-01	-9.4808085e-01	-9.8441194e-01	-1.1291834e+00	7.7499136e-01	-1.1193928e+00	-5.6731286e-01	4.0252124e-01	5.0596105e-01
-5.2032530e-01	-2.3688980e-01	-1.3845069e+00	1.7498396e-01	2.3660096e-01	1.3643492e+00	-9.3588384e-02	1.3254553e+00	1.0335746e+00
1.0866408e+00	-1.0089804e+00	3.6997320e-01	4.2468500e-01	-7.0393642e-01	1.3281727e-01	9.9794882e-01	-1.0688157e-01	3.5027612e-01
1.0934600e+00	3.8413554e-01	9.2776513e-01	-1.7748944e-02	1.7855202e-01	-1.4125991e+00	-4.3734347e-01	6.3245866e-01	5.4272321e-01
-5.3429660e-01	1.9310200e-01	1.2242502e+00	1.4480744e-01	7.0283565e-01	-5.3814976e-01	8.9510795e-01	-1.4168537e+00	3.3667831e-01
-1.2512027e+00	2.0014506e-01	-1.4584364e+00	-9.5573826e-01	1.7041532e-01	-3.7684895e-02	-1.0078711e+00	2.1178346e-01	1.1346922e+00
8.5775229e-01	-8.0769703e-01	-1.2347231e+00	-1.2961758e-01	-9.6213383e-01	1.2316888e+00	1.7794644e-01	2.0193974e-02	6.6050683e-01
-5.2596693e-01	-1.4212368e-01	1.3690973e+00	-1.3588782e+00	-8.0584756e-01	1.0397137e+00	-5.0456502e-02	1.0811699e-01	6.5662572e-01
5.1560310e-01	-1.0622253e+00	1.3942861e+00	7.1286431e-01	-4.7409323e-01	9.2991424e-01	2.0759174e-01	1.2817087e+00	2.8312263e-01
1.2287022e+00	8.4984514e-01	6.2635746e-01	-9.2399114e-01	-1.0059775e+00	-3.5479367e-01	-1.3151228e+00	-2.2228226e-01	3.5254832e-01
1.1099521e+00	-1.4745414e+00	-2.8712872e-01	-6.2664139e-01	5.8745501e-01	-2.7437501e-01	9.7650162e-01	-5.4433422e-01	1.0791684e+00
1.8842515e-01	1.4065067e+00	-2.8610519e-01	-1.3432978e+00	-6.6940910e-01	4.3724046e-01	3.8262716e-01	-3.0746697e-01	9.0253338e-01
1.3612520e-01	-1.3271286e+00	1.2084355e+00	-1.3211706e+00	-7.1547082e-01	5.1522167e-01	-2.5470173e-02	3.2256219e-01	7.6035472e-01
7.7672785e-01	2.5699957e-01	-2.2095097e-01	-1.3702117e-01	1.0985942e+00	1.1012502e+00	-8.2058891e-01	-1.0862344e+00	7.5336622e-01
1.1474972e+00	-2.9813328e-01	-1.6038396e-01	-1.2730828e-01	9.3293472e-01	-1.5525557e+00	-4.6119188e-02	-5.4743437e-01	8.1175859e-01
-2.5232410e-01	1.1432190e-01	-8.6712439e-02	-2.4573959e-01	1.4485150e-01	2.6490436e-01	8.4819124e-01	9.9550728e-01	9.0129914e-01
3.3901652e-01	-1.2464702e+00	3.2302244e-01	1.0490499e+00	-2.1507151e-01	6.1083115e-01	-9.9724071e-01	-6.3167645e-01	6.7667338e-01
-9.9835585e-01	-1.2856766e+00	3.6597943e-01	7.6290680e-01	1.2662864e+00	-4.8559699e-01	-2.2785697e-01	-1.1444469e+00	8.4040491e-01
-1.2045949e-01	-4.9189064e-01	-2.2219244e-01	1.3349624e+00	1.3263221e+00	4.2916786e-01	9.3479083e-03	1.2524922e+00	1.0352568e+00
-1.3770548e+00	1.4659571e+00	9.6539756e-01	-5.4098461e-01	-1.2456860e+00	-7.2579766e-02	3.0661868e-02	-1.1758422e+00	3.7224771e-01
-4.6479720e-02	-1.1693929e+00	-8.8927311e-01	-5.5921688e-01	-6.7184753e-01	-9.1017206e-01	1.1282670e-01	1.3798628e+00	9.0180941e-01
1.0719191e+00	-1.8358984e-01	-1.4568398e+00	8.8704377e-01	-8.5745751e-01	-8.4722571e-01	-1.2436833e+00	1.1705670e-01	1.1225595e+00
-1.2902713e+00	-5.5050388e-01	4.6587096e-01	-1.4540745e+00	-8.0288465e-01	1.5170685e+00	-1.5690579e+00	7.3491011e-01	5.1004661e-01
8.2508237e-01	-3.2835217e-01	1.0443441e+00	-1.8061503e-01	-9.4188314e-01	2.0422212e-01	-6.2655979e-01	-1.1080738e+00	3.9695336e-01
1.6937392e-01	1.1633950e+00	2.1299342e-01	-8.1837474e-01	2.5545619e-01	-1.3995300e+00	2.8253566e-02	-3.5214222e-02	7.1960727e-01
3.8453552e-01	-9.3597147e-02	1.5063954e+00	-5.3166909e-01	-1.1049803e+00	-7.9636057e-01	4.7719012e-01	-1.2260139e+00	3.8622199e-01
6.3246812e-01	8.5067111e-01	-1.0706203e-01	-1.0729293e+00	-1.4502818e+00	-1.2474759e+00	-3.5162963e-01	9.1298917e-02	7.1589102e-01
-1.2579216e+00	-1.5884435e-01	7.4106475e-01	1.8442000e-02	7.3109609e-01	6.6138918e-01	-5.0332838e-01	1.3636873e+00	8.6575905e-01
1.0294224e+00	6.5672406e-01	-1.3395523e+00	-1.0629862e+00	7.6317788e-01	1.0131797e+00	8.6891182e-01	-1.5683877e+00	3.7276342e-01
7.5156513e-01	1.1463497e+00	-1.2023250e+00	6.2774039e-01	-3.9210447e-01	1.0791088e+00	-1.4633103e+00	1.2121617e+00	7.8317133e-01
-7.8895614e-01	-6.8835433e-01	-7.5161224e-01	9.6460444e-01	9.6162056e-01	1.6722704e-01	-1.4681697e+00	-4.2614090e-01	1.3149153e+00
6.7670908e-01	1.3144835e+00	-2.9012877e-03	1.4887787e+00	-1.5374333e+00	-1.1404931e+00	-1.4594809e+00	6.8112193e-01	1.1319948e+00
8.8412517e-01	8.4454611e-01	1.5035407e+00	-8.8264610e-01	-4.2723321e-02	-1.4103014e+00	6.0337535e-02	-3.4728000e-01	6.1023153e-01
-2.4148717e-01	5.7091962e-01	-9.6268576e-01	-3.2423555e-02	1.3738660e+00	3.8047900e-01	-6.4148179e-01	3.4414837e-01	1.2261887e+00
2.6282583e-01	1.0221459e+00	-6.5747557e-01	-1.4471648e+00	-1.3957534e-01	1.5694571e+00	5.6153901e-01	4.2951126e-01	8.8576398e-01
2.3449495e-01	9.7812646e-01	-1.2104813e+00	-2.8796901e-01	9.2697793e-01	1.0534110e+00	4.4182348e-01	-5.8422444e-01	6.9339175e-01
-1.5421444e+00	-5.8292746e-01	3.9522196e-01	1.2990811e+00	5.6001729e-01	-1.3378303e+00	-9.9773642e-01	1.5584140e+00	5.6322656e-01
-6.8117544e-01	1.3657438e+00	1.1685782e+00	-4.1351445e-01	-1.0583020e-03	-5.3479349e-01	8.6564946e-01	8.0687339e-01	6.6147934e-01
-5.5195001e-01	-1.5616964e+00	-9.4325247e-01	-7.3440311e-01	1.0626742e+00	-1.7756276e-01	2.5494703e-01	-1.1343813e+00	1.2475300e+00
4.9928833e-01	5.7505471e-01	-7.6766459e-01	2.0443023e-01	4.1031761e-01	2.1574838e-01	-2.3762756e-01	7.7916003e-01	1.0477904e+00
3.4505269e-01	1.4054685e+00	3.8222161e-01	-1.0435351e+00	4.1225755e-01	6.8511858e-01	-8.4206542e-01	1.1844962e+00	8.4606743e-01
-7.9515030e-02	7.3239309e-02	-5.5839083e-01	8.1665543e-01	-1.5408282e+00	8.5094237e-01	2.8136854e-01	-4.4426237e-01	4.5633034e-01
-1.2322347e+00	-5.7125179e-01	-9.3735197e-01	-9.0449701e-02	-5.5209676e-01	1.2585827e+00	8.6413286e-01	8.4810309e-01	8.0378279e-01
-7.8903410e-01	-3.2162190e-01	1.0125214e+00	3.4272605e-01	1.1745325e+00	6.5594835e-01	-1.0185474e-01	6.6269881e-01	6.0763009e-01
-6.3354623e-01	1.1817598e+00	-5.5993954e-01	-1.4842094e+00	-1.4001920e+00	6.7527431e-01	2.9532901e-01	1.0330172e+00	5.2332711e-01
-1.1539207e+00	6.8838760e-01	1.3076747e+00	-8.6185026e-01	6.4346162e-01	-1.2388823e+00	-1.2170961e-01	1.4786055e+00	5.3492682e-01
-8.9374393e-01	-7.5534452e-01	-4.9361390e-01	7.6647247e-01	1.2975855e+00	5.8153560e-01	-3.9663316e-01	9.2413132e-01	1.3362288e+00
-1.1996804e+00	1.0057113e-01	7.7730522e-01	-1.5686797e+00	-4.1702182e-01	3.7408422e-01	2.4610781e-01	-1.5890126e-01	8.6087325e-01
-2.8726608e-01	1.2221636e-01	1.4265502e+00	-5.5477327e-01	7.3997139e-03	9.0652881e-01	-1.1435716e+00	-2.9972051e-01	6.3877486e-01
5.4689088e-01	-5.1116567e-01	-6.0635433e-01	1.7261041e-01	-1.2967139e+00	-6.9463656e-01	2.5607258e-01	-1.4296267e+00	3.8590464e-01
-7.0504548e-01	1.0945267e+00	3.2929452e-01	1.3731926e+00	-6.4162817e-01	-5.9844086e-01	-1.7003747e-01	-8.3611407e-01	3.9393911e-01
3.8813417e-01	-1.4564177e+00	-1.0331770e+00	1.1092038e+00	1.2430038e+00	1.3841844e+00	1.0295192e+00	-2.2531104e-01	4.3075666e-01
1.4245909e+00	1.2782750e+00	-1.0226551e+00	1.7772170e-01	-4.2672711e-01	4.9304807e-01	-7.6279321e-01	-1.1834629e+00	6.7790827e-01
1.0223025e+00	-1.3834641e+00	-1.1065075e-01	-6.8600854e-01	2.5348810e-01	-8.6256140e-01	5.7416486e-01	-1.0386696e+00	1.1148281e+00
4.6803493e-01	-9.5341201e-01	1.1574193e-01	-1.0056749e-01	3.7477604e-01	1.3805806e+00	-9.8383152e-01	9.1039715e-01	9.6204402e-01
-2.8494237e-01	1.2684874e+00	6.2877135e-01	-6.1018663e-02	-3.2426228e-02	-3.8562193e-01	-1.0541402e+00	1.4886787e+00	5.0505562e-01
-1.2392065e+00	6.2024904e-01	-5.5766715e-01	-1.3814721e+00	-1.4920857e+00	-4.2078423e-02	-1.4940200e+00	5.7887421e-01	7.3046430e-01
1.4154947e+00	7.2115978e-01	-1.3408947e+00	1.1097622e+00	-1.2918302e+00	-3.5370092e-01	7.5564611e-01	-3.7360558e-01	4.0652839e-01
-1.0613427e+00	2.6801357e-01	1.3676428e+00	1.3750908e-01	-2.4320107e-01	-7.5800680e-01	-1.3149690e+00	8.5477156e-01	6.6706864e-01
-2.4474132e-02	-5.3972664e-01	-1.0601331e+00	-1.0971499e+00	-2.6834467e-01	-6.6209230e-01	4.2038273e-01	-3.5760072e-01	1.0205381e+00
2.1190791e-01	-1.4076787e+00	1.4561460e+00	1.3502096e+00	1.2581748e+00	-2.6416128e-01	-6.9409711e-02	-3.2857687e-01	3.4896355e-01
-1.0297601e+00	4.7918795e-01	4.3944870e-01	1.2488780e+00	8.3688073e-02	-6.8822387e-01	-1.0381455e+00	5.2845760e-01	8.9957583e-01
-1.4434975e-01	-1.3316253e+00	-7.0005004e-02	9.1265843e-01	-8.8806973e-01	3.6558306e-01	2.9349025e-01	5.0441938e-01	5.4273514e-01
-7.7679117e-01	8.0267538e-02	1.5231510e+00	-1.3467294e+00	-8.1330244e-02	-6.0075424e-01	3.9009119e-01	-1.3819746e+00	5.9065664e-01
9.2981116e-01	1.3132577e+00	-1.2405149e+00	6.9449841e-01	-3.2460348e-01	2.0220143e-01	-2.4119267e-01	-1.0520401e+00	6.7923165e-01
1.0543803e+00	-9.0815671e-01	1.4164089e+00	1.4179877e+00	1.3357179e+00	-8.0385788e-01	-1.0706973e+00	-7.5499708e-01	3.1945712e-01
-7.5363303e-01	-1.5326659e+00	-1.4046263e+00	-2.6690875e-03	-4.1071329e-01	1.5506265e+00	-1.6721704e-01	-3.4321269e-01	8.7502814e-01
5.9117265e-01	1.5436662e+00	1.5147863e+00	-8.7705568e-01	-7.7926334e-01	-1.2733341e+00	1.3085716e+00	-4.1163247e-01	5.5617754e-01
-1.0188033e+00	1.1253358e+00	-4.5328988e-01	-3.2216141e-01	2.2081758e-01	-3.9708551e-01	-1.1271009e+00	-5.1994531e-01	9.5035317e-01
-1.3477723e+00	1.1303673e+00	-8.0875070e-02	1.5390006e+00	1.0600607e+00	-1.0733348e+00	6.1849257e-01	1.1899728e+00	9.3414075e-01
-1.1261432e+00	8.7174474e-01	1.0423172e+00	1.2510804e+00	4.6810659e-01	-5.1359351e-01	-5.2550011e-01	4.9320346e-01	6.5772167e-01
1.0073932e+00	-9.7420887e-01	7.0407131e-01	2.2868930e-01	9.1951394e-01	1.1304534e+00	-1.0633543e+00	-1.3924703e+00	4.1540498e-01
1.2141723e+00	4.5247866e-01	-1.0530022e+00	1.4132792e+00	7.7652658e-01	-8.2126465e-01	7.2521260e-01	-1.5241537e+00	7.3938634e-01
-1.1916864e+00	-9.8705615e-01	-1.2168973e+00	-5.9873276e-01	9.0630026e-01	1.1630991e+00	-7.3127953e-01	9.4818315e-02	1.4500372e+00
-1.0205138e+00	1.2980259e+00	-6.2422165e-01	-3.8024274e-01	-1.3943122e+00	1.2163960e+00	-7.0458228e-01	8.2394256e-01	4.4247226e-01
1.3210938e+00	7.0178875e-01	-1.5154380e+00	-7.4020658e-01	-1.0654122e+00	-1.5174437e+00	-1.2517505e+00	-1.3779447e-01	1.1073042e+00
-1.1538840e+00	1.4246366e+00	-1.0746240e+00	5.4896164e-02	6.9464710e-01	-2.2703081e-01	1.0761734e+00	-5.5779010e-01	8.0058430e-01
-2.7635772e-01	-1.3524871e+00	-1.8987314e-01	-9.8841071e-01	7.7544457e-01	1.3282905e+00	1.0974788e+00	-2.6568954e-01	7.1829894e-01
-1.4702964e+00	1.3131196e+00	6.6031407e-01	5.2318730e-01	1.5705993e+00	4.2123981e-01	1.0357835e+00	-1.2409124e+00	1.5274785e-01
4.9700211e-01	-8.6446190e-02	-1.3483079e+00	-1.0881834e-01	1.4004353e+00	-1.3724079e+00	8.4920762e-01	1.0193083e+00	1.1723867e+00
-3.8046769e-01	-1.4853054e+00	-7.0350024e-01	-5.0291512e-01	3.0429950e-01	-4.8686758e-01	3.7699450e-01	4.0987867e-01	1.2739571e+00
-1.3794467e+00	-4.3228586e-01	1.2261333e+00	1.5313336e+00	-1.5114301e-01	1.0654415e+00	-4.4583710e-01	-6.8189200e-01	4.6325115e-01
5.9286767e-01	1.0753927e+00	-1.2256365e+00	1.1966668e+00	1.2878320e+00	-2.0228713e-01	-4.8564904e-01	-2.8839369e-02	1.1790667e+00
-8.0495607e-01	5.4241332e-01	1.5039840e-01	-9.7630333e-02	-9.8147719e-01	-6.3656240e-01	-4.4574535e-01	-8.9801329e-01	7.3316845e-01
-1.1986761e+00	-5.6115959e-01	-1.2361329e+00	-9.6164277e-01	8.1581894e-01	1.5602396e+00	1.0563412e+00	-6.9827527e-01	5.8696177e-01
8.8508311e-01	-3.4800678e-01	-3.3418094e-01	1.1641741e+00	1.5585651e+00	7.2631609e-02	7.8696345e-01	1.0776330e+00	9.9216346e-01
1.5053601e-01	6.9554155e-01	5.8864875e-01	4.3491409e-01	2.0391576e-01	-1.3600971e+00	3.8963703e-01	4.9586902e-01	8.0185905e-01
1.0766681e+00	1.0062636e-01	5.4426713e-01	-8.8502241e-01	-2.6533578e-01	-9.2420461e-01	1.5504445e+00	-5.7468219e-01	7.2145313e-01
-1.3607523e-02	1.0504348e+00	-8.2020331e-01	8.6951582e-01	1.5630397e+00	-1.0728223e+00	-1.1896595e+00	-1.4276791e+00	1.0614157e+00
6.3461740e-01	-1.0936861e+00	1.5145577e-01	-7.3669528e-01	9.9210269e-03	-1.3245923e+00	-1.5114441e+00	4.8277905e-01	1.8615353e-01
3.0757759e-01	-1.2402325e-01	8.2706200e-01	-6.2098821e-01	2.3828887e-01	-1.0969070e+00	7.6735015e-02	-6.6634814e-01	7.6373737e-01
1.5365792e+00	1.5588213e+00	-1.1165119e+00	-5.7799614e-01	-6.0963243e-01	-8.5094894e-01	-1.5091872e+00	4.6470065e-01	1.0532128e+00
1.3950928e+00	1.3685857e+00	-4.8209775e-01	-5.7656540e-01	-1.3585260e+00	-1.3691270e+00	3.0950203e-01	2.2453125e-01	6.1649351e-01
-1.5234016e+00	-9.2101454e-01	-4.4941392e-01	1.4786058e+00	3.4820229e-01	1.2481851e+00	-6.7676278e-01	6.4391203e-01	9.5670967e-01
1.7026003e-01	-8.6434368e-01	-9.1102823e-01	9.2966346e-01	-5.5116929e-01	-1.3083950e+00	1.3549920e+00	-5.5719183e-01	5.4260490e-01
-4.3052844e-01	-2.9982324e-01	4.7106579e-01	-1.4280974e+00	1.0545259e+00	9.5301894e-01	-5.5436673e-02	3.6469088e-01	1.0167378e+00
-8.0360753e-01	-1.4625545e-02	3.8932156e-01	-2.6454255e-01	-1.4485224e+00	1.5500369e+00	1.3288584e+00	1.1237092e-01	7.1244229e-01
-5.2486654e-01	-7.6730307e-01	-6.1010797e-01	-8.1299594e-01	-1.1152276e+00	1.3836314e+00	5.4118862e-01	5.2090794e-01	9.6500134e-01
1.6016930e-01	1.7511479e-01	7.3694541e-02	-1.2362637e+00	-8.8931647e-01	6.2470073e-01	8.4644116e-01	-7.1904904e-01	7.5982249e-01
-3.7948253e-01	-5.1811780e-01	7.9665236e-01	6.0977746e-01	9.5588795e-01	1.4244812e-01	1.0049663e+00	6.4975877e-01	4.9708515e-01
-5.2975620e-01	4.8904671e-01	-1.3170578e-01	6.5449017e-01	-4.9605868e-01	2.3200348e-01	1.2662283e+00	3.1963351e-01	3.0033635e-01
-3.3879512e-01	1.0016871e+00	1.2438564e+00	1.3004387e+00	5.2858521e-01	5.6592739e-01	3.5072406e-01	-4.3004208e-02	2.7451816e-01
-1.5636700e+00	-4.4052444e-01	1.3377613e+00	4.1305574e-01	-4.9232787e-01	-1.2009758e+00	9.9145549e-01	-2.0541897e-01	7.4767878e-01
-1.1784429e+00	8.3958668e-01	-6.2432391e-01	-6.9189578e-01	4.0059929e-01	-6.7377723e-02	3.8504903e-01	1.3370418e-01	1.1706841e+00
-1.4896875e+00	-1.1009065e+00	-9.2445925e-02	1.4835506e+00	4.3919964e-01	-1.4440286e+00	-1.6186049e-01	9.2732960e-01	1.1098832e+00
1.3163616e+00	1.0456810e+00	1.3496939e+00	-7.8614785e-01	-1.1143695e+00	-9.8476885e-01	2.3002930e-01	1.8748735e-01	4.5049709e-01
9.9382308e-01	6.9047364e-01	-1.1348981e+00	7.5173635e-01	9.6742336e-01	-1.0999256e+00	-1.1980936e+00	8.2447356e-02	5.4971365e-01
-6.6362714e-01	-2.5285106e-01	1.5182165e+00	-1.0527570e+00	-1.3991603e+00	-1.3178439e+00	1.2503145e+00	2.5034964e-01	5.7427755e-01
-9.2736954e-01	9.0701936e-01	6.4861203e-01	-2.3788573e-01	-8.6536074e-01	-7.7393057e-01	-7.7995636e-02	1.0338098e+00	7.4489657e-01
-8.5871966e-01	1.2668287e+00	-1.0410309e-01	1.1019349e+00	1.4561011e+00	-1.2575628e+00	-8.2852038e-01	-9.0709294e-01	1.0039484e+00
-2.4693286e-02	1.0169527e+00	2.0642207e-01	5.3147295e-01	-3.1523279e-01	7.7697666e-01	-1.4033586e+00	6.3817207e-01	9.0768107e-01
-3.2981913e-01	-1.4814223e+00	1.0175246e+00	9.1795996e-01	-1.3922048e+00	-9.5388624e-01	8.2936270e-01	3.6058266e-01	7.6118281e-01
-1.5006552e+00	-1.1420352e+00	-1.2952845e+00	-2.0845521e-01	-2.0396931e-01	-4.1880529e-01	-1.4777427e-01	1.8056892e-01	1.1471168e+00
-8.0690143e-01	9.4568756e-01	1.3901114e+00	-6.3089336e-01	-6.3465643e-01	1.4486237e+00	1.3575605e+00	4.3310415e-02	3.8880067e-01
6.6311722e-01	8.5366608e-01	-4.2281276e-01	-5.4947631e-01	-9.6361497e-01	-3.2468045e-01	-8.6756292e-01	-9.3135690e-01	5.7779574e-01
-1.3596803e+00	-8.7804366e-02	6.8480156e-02	1.2341231e+00	-5.6665406e-01	4.2083562e-02	-9.9844900e-01	1.2407798e+00	1.0328431e+00
-2.0183909e-01	8.2057062e-01	1.1230661e+00	1.1128806e+00	1.5542130e+00	4.4007598e-01	1.4556375e+00	-1.0674784e-01	2.8932413e-01
6.1051992e-01	-2.6134455e-01	6.8342058e-01	-8.5768180e-01	-6.8457254e-01	1.0478179e+00	1.3168331e+00	-2.6158759e-01	4.0243389e-01
5.6674622e-01	-4.7132808e-01	5.8698625e-01	-1.4308638e+00	-1.0983765e+00	-1.0924970e+00	-5.0662716e-01	-1.4144914e+00	3.4676213e-01
-5.2399714e-03	1.4855886e+00	8.7697015e-01	3.6360135e-01	-4.1459016e-01	1.0115884e+00	-1.1666218e+00	-9.2513639e-01	5.2616013e-01
-1.0360521e-01	-1.0912969e+00	-1.1154068e+00	6.5014387e-01	3.5645720e-02	-5.3289740e-01	-7.3349706e-01	-1.0252990e+00	1.0850318e+00
-8.5037557e-01	-8.0826698e-01	-7.5799175e-01	5.0877504e-01	-9.4657842e-01	2.7411297e-01	-2.7558309e-01	-5.6437521e-01	8.0513117e-01
-1.1572710e+00	-2.9651925e-01	-4.0906477e-01	-4.3314912e-01	-1.1838779e-01	1.4418741e+00	-1.0173910e+00	-9.8595117e-01	9.9796612e-01
-6.5394342e-01	-1.0330801e+00	-1.3468239e+00	-8.6700917e-01	-1.1154427e+00	-6.6794141e-01	3.9902542e-01	1.0199436e+00	7.7748069e-01
-1.5359725e+00	6.0504639e-01	-8.9440437e-01	-1.1164066e+00	-1.3628384e+00	-1.1807688e+00	-8.8007059e-01	-1.4785382e+00	6.7171079e-01
-6.2372898e-01	-3.2078288e-01	2.6664684e-01	1.2880132e+00	1.2629931e-01	2.5938151e-01	-7.2817828e-01	2.0698118e-01	7.4548852e-01
4.8177718e-01	-4.2481736e-01	-1.5192296e+00	-1.0777897e+00	-1.0041578e+00	-1.1054854e+00	1.1526487e+00	9.8955638e-01	6.2805754e-01
1.3448412e+00	9.3471052e-01	1.1729112e+00	1.2476815e-02	-2.4486537e-01	-5.1487148e-01	1.5060942e+00	-1.1735023e-01	4.9740625e-01
-1.0130095e+00	-1.4251114e+00	-3.7614429e-01	-7.8887759e-01	3.4042257e-02	-1.4988099e+00	1.1131138e+00	6.1491440e-01	1.0548464e+00
-1.3602683e+00	-3.4471424e-01	-9.7269668e-01	-1.1446458e+00	3.7834364e-01	-1.2085513e+00	-7.9941605e-02	-9.7347499e-01	1.2385491e+00
-6.5983820e-01	-5.1530836e-01	7.3512524e-01	1.0508562e+00	2.3810237e-01	1.4165108e+00	1.0230938e+00	2.2030911e-01	4.7211180e-01
-7.8528048e-02	5.8330122e-01	-6.3398633e-01	-2.9369860e-01	-6.0244880e-01	3.0849134e-01	1.2004729e+00	-1.2025002e+00	6.4942459e-01
-3.5198216e-01	-1.3670060e+00	8.7407388e-01	-7.5038881e-01	-3.7779194e-03	1.1861408e+00	1.0405787e+00	-5.5589347e-01	3.4597309e-01
-1.4528034e-01	-8.0335222e-01	4.7250514e-01	-1.4318684e+00	-6.6363793e-01	-1.0790199e+00	-2.4055863e-01	1.9498513e-01	3.8712928e-01
-7.0922921e-01	6.2438721e-01	-5.5225633e-01	-8.1182125e-01	-1.1087006e+00	1.3263755e+00	1.6091547e-01	4.3392845e-01	7.6305206e-01
-8.1288700e-01	1.1563614e+00	-1.5074217e+00	-3.4278741e-01	-1.1451938e+00	-3.4857053e-01	-4.0504529e-01	1.3989872e+00	9.1148020e-01
5.9462692e-01	1.0744556e+00	-1.4328422e+00	4.5284744e-01	1.2657122e+00	6.4534681e-01	2.3508271e-01	1.0986243e+00	1.1399076e+00
4.8849339e-01	4.9997186e-01	-1.4706408e+00	-1.0721118e+00	1.1004760e+00	1.5659386e+00	-1.0883743e+00	1.4379079e+00	1.0123926e+00
1.1267258e+00	-7.3326296e-01	9.9052597e-01	1.1924673e+00	1.1433848e+00	-1.5337338e+00	1.1875420e+00	-1.3533964e+00	3.4894798e-01
-6.4083409e-01	5.1732745e-01	4.7051051e-01	-1.5637514e+00	-2.5397852e-01	-6.9623743e-01	4.7951311e-01	-1.4022566e+00	8.0179243e-01
-1.1189925e+00	-1.2060931e+00	4.8151166e-01	5.9464722e-01	8.0749042e-01	7.7014819e-01	9.9174412e-01	5.0102406e-01	3.7435233e-01
-1.3333778e+00	-1.2507245e+00	2.3722476e-02	8.2959250e-01	-1.8876758e-01	5.1894604e-01	-1.0472658e+00	1.2431389e+00	1.0471679e+00
-1.1008919e+00	-5.3006370e-01	-2.7862115e-01	5.7297264e-01	3.9194377e-01	8.6483440e-01	9.4805899e-01	-1.2966778e+00	5.4827218e-01
1.2908897e+00	7.7622102e-01	1.3289193e+00	9.6965566e-01	-5.2079135e-01	-8.7752576e-01	-1.3054228e-01	-3.6215960e-02	5.5623681e-01
1.4497111e-01	-1.0875752e+00	1.5637975e+00	1.5616662e+00	-4.6313536e-01	1.2020401e+00	-1.1923525e+00	7.8733916e-01	3.8134746e-01
-1.3465078e+00	-1.0901938e+00	1.8088427e-01	-1.0824129e+00	9.5060844e-01	-8.9381250e-01	3.5120171e-01	4.2102667e-01	1.0725874e+00
1.2769911e+00	-1.1182881e+00	-9.3981964e-01	8.4938348e-01	-1.2641962e+00	7.8935963e-01	-4.0538402e-01	1.3285359e+00	6.6925673e-01
-9.7105743e-01	1.0807348e+00	3.7915825e-01	1.9120898e-01	-7.5397624e-01	-1.7843188e-01	8.2528370e-01	1.4042345e+00	6.9605452e-01
1.1533891e-02	-7.7831354e-01	1.3628548e+00	-1.9992200e-01	1.1060628e+00	1.3163197e+00	4.1160350e-01	1.3248830e+00	2.6200553e-01
-9.2863544e-01	4.7616016e-01	1.4799621e-01	1.4150721e+00	7.9456375e-01	2.8900457e-01	3.2969954e-02	-2.9958410e-01	4.9508157e-01
-1.4357004e-01	1.1872630e+00	-7.6906851e-01	1.2598550e+00	-6.7739905e-01	3.9749318e-01	1.2057054e+00	8.6306188e-01	5.3963971e-01
-2.3851879e-01	-1.0680051e+00	-1.2223388e+00	4.7827089e-02	8.5883582e-02	-1.4996610e+00	1.0178668e+00	7.4766013e-01	1.1258089e+00
-1.1315523e-01	1.0979609e+00	-9.7378141e-01	-4.1782852e-01	1.4543379e+00	1.9471379e-01	1.3154608e+00	-4.4686017e-01	8.2593353e-01
-1.1364089e+00	-2.8640903e-01	1.3536182e+00	-9.8440934e-01	1.4657872e+00	-9.8485089e-01	1.5621538e+00	1.1691233e+00	5.4166762e-01
1.2587557e+00	-7.5659908e-01	-1.1533027e+00	-1.3408645e+00	-8.8439782e-01	6.6281331e-01	8.2992703e-01	-1.2064716e+00	1.0468284e+00
4.2162757e-01	1.0062475e+00	6.7556482e-02	-1.2649934e+00	-1.1992732e+00	-1.8422866e-01	-8.7769209e-02	-1.3287808e+00	4.8919311e-01
-1.1384192e+00	8.0789267e-01	1.3068521e+00	1.5543460e+00	2.7402828e-01	1.2791986e+00	1.4114518e+00	7.6400171e-01	6.8412688e-01
-1.1128658e+00	2.8870880e-01	1.3884144e+00	1.5509261e+00	1.8394428e-02	-1.5698317e+00	1.0347182e-01	8.8754769e-01	6.2366619e-01
1.1079064e+00	-1.4318935e+00	-6.6960697e-01	6.2081541e-01	1.2790778e+00	-1.0661143e+00	-1.3914912e+00	7.3209381e-01	5.4233799e-01
3.6294202e-01	-1.2338616e+00	-8.9942858e-01	8.1534115e-01	-4.5860614e-01	1.4614667e+00	-7.7645118e-01	-1.3177409e+00	7.1237590e-01
-1.0064844e+00	1.4059852e-01	6.4766476e-01	-1.8852384e-01	-1.4665709e+00	-1.2421454e+00	3.6090275e-01	9.5627521e-01	7.4745823e-01
1.4936557e+00	5.6168641e-01	-3.1695888e-01	1.3467614e+00	2.7929725e-01	-8.5517524e-01	-7.2292299e-01	-2.7062636e-01	8.9250750e-01
-5.9618940e-01	-2.2235643e-01	1.0132087e+00	-1.5552099e-01	6.0952820e-01	-1.4384823e-01	1.5137194e+00	6.0897329e-01	5.1540623e-01
1.5252901e+00	1.3507087e+00	1.5671660e+00	-3.6145958e-02	-3.9314442e-01	1.3690786e+00	4.6506933e-01	-2.9483209e-01	4.1644067e-01
1.5405367e-01	2.1302874e-01	2.4606419e-01	-1.1777283e+00	-8.0888759e-01	1.0793724e+00	1.3765615e-01	-9.5131563e-01	6.5098713e-01
5.0763994e-01	-1.0416115e+00	1.2648534e+00	1.0955280e+00	-1.3022734e+00	1.4557676e+00	1.3746569e+00	-1.1967798e+00	5.5473851e-01
-6.6119569e-01	-1.4099391e+00	-7.6590209e-01	-3.3565256e-01	1.6645839e-01	3.6328565e-01	5.8654374e-01	1.3392421e+00	1.0935062e+00
-9.0266410e-01	1.8716563e-01	-1.4112887e+00	9.8785617e-01	-1.4929349e+00	-1.5141213e+00	-2.7714773e-01	-8.6858239e-01	1.0893421e+00
-3.2461725e-01	9.5847529e-01	-5.0446966e-01	-4.1845770e-01	1.4349669e-01	-9.3657099e-01	9.5997876e-01	7.1678344e-01	1.0439518e+00
1.1043517e+00	-9.9295162e-01	5.3703323e-01	1.0073969e+00	-9.9436039e-01	-1.5695063e+00	-8.5691889e-01	-1.0285004e+00	7.5890269e-01
3.1001070e-01	-3.9762910e-01	1.2184741e-01	1.2775337e+00	1.0577980e+00	1.2613612e+00	-1.1750008e+00	-9.6308552e-01	7.0676729e-01
-1.5523523e+00	-7.8476626e-01	-4.2906050e-01	-1.2768863e+00	1.3841658e-01	2.2966589e-01	-1.8624374e-01	-1.0929569e+00	1.2041052e+00
5.4207244e-01	-1.1605467e+00	-1.2646027e+00	-4.0816930e-01	-1.5526989e+00	-1.0227289e+00	-1.1722331e+00	-4.3423277e-01	1.1721115e+00
-7.1510515e-03	8.4005343e-01	-1.3040342e+00	1.1369649e+00	9.9967431e-01	-1.3512503e+00	-7.9452112e-01	-2.3037083e-01	8.6247911e-01
-8.0720204e-01	4.6059779e-01	-1.1527585e+00	-1.3387013e+00	2.8868110e-01	1.0890476e-01	1.3938228e+00	-1.4004565e+00	7.8430465e-01
-1.2476779e+00	3.8279239e-01	-2.1053792e-01	5.3361765e-01	1.2442131e+00	-1.1862587e+00	-8.7734214e-01	-6.5975758e-01	1.0165396e+00
4.0900506e-01	-3.9000510e-01	-1.0775245e+00	-7.3523912e-01	1.0488035e+00	-9.0232016e-01	1.1465179e+00	1.2764515e+00	1.0908975e+00
3.4339307e-01	-1.4534395e+00	1.3265390e+00	-1.2799601e+00	-2.3626629e-01	-8.2723840e-01	-1.0022641e+00	-6.1598031e-01	6.4178538e-01
3.0167408e-01	1.0670287e+00	-7.4209385e-01	1.3374741e+00	4.5530361e-02	1.2932984e+00	1.6737238e-01	-1.2332112e+00	6.7322882e-01
-2.9430574e-01	1.3396945e+00	-2.4842001e-01	8.3095538e-01	-1.3198363e+00	-2.1253247e-01	1.3022270e+00	-1.4942499e+00	7.0614646e-01
-1.5297926e+00	4.5154870e-01	-1.8520248e-02	1.4877619e+00	2.9728381e-01	-4.2453440e-02	-9.4624347e-01	3.4358275e-02	9.9559369e-01
-4.3063458e-01	-9.0889708e-01	-2.5213735e-01	8.7890875e-01	1.3167514e+00	-3.7343619e-01	-7.7199933e-01	-5.9352544e-01	1.1605148e+00
5.5410535e-01	-1.4098114e+00	3.3606190e-01	5.0725695e-02	1.2617422e+00	5.6003988e-01	-2.1510431e-01	-8.2546215e-01	7.0376701e-01
1.1680022e+00	-8.0759005e-01	-3.9118074e-01	1.1751427e+00	3.5074987e-01	3.7859364e-01	7.1496614e-01	-2.6914074e-01	3.8285677e-01
-1.1999556e+00	-1.4857726e+00	7.7864598e-01	-5.7004007e-01	1.4252486e+00	1.2982519e+00	-1.5595523e-01	4.4499222e-01	8.7980270e-01
1.3703172e+00	1.1392708e+00	-1.1719389e+00	1.1941580e+00	-4.9083891e-01	1.3583875e+00	-1.0513458e+00	-1.1478876e+00	6.5900069e-01
-9.4255946e-02	-2.8368701e-01	1.0095898e+00	-1.4211580e+00	2.9272636e-01	4.6468140e-01	1.4898569e+00	-2.6511770e-02	4.8912762e-01
-7.9698278e-01	1.0101345e+00	4.3421452e-01	1.2638897e-01	1.1780384e-01	-9.9110910e-02	1.5308928e+00	5.2283492e-01	6.6565183e-01
8.6151325e-01	1.6317666e-01	-7.6379874e-02	5.0277101e-01	7.2572247e-01	-7.1295858e-01	7.0996360e-02	2.5183595e-01	9.4516266e-01
-1.4738145e-01	-1.0033594e-01	1.1948553e+00	-8.1193068e-01	1.5548114e+00	-6.6041216e-01	-5.6938254e-01	8.8148313e-01	6.5588297e-01
-1.4649715e+00	6.8915920e-01	8.7338680e-01	9.5953036e-01	-5.2348075e-02	-3.0034190e-01	-3.2117164e-01	-6.6401040e-01	5.4504647e-01
-1.1142233e+00	-3.5335935e-01	1.4911475e+00	1.0315921e+00	-1.6815852e-01	6.9310671e-01	-6.7554998e-01	-1.0856295e+00	4.5852234e-01
2.8310647e-01	-1.3004101e+00	1.2315630e+00	-4.8065081e-01	1.1931306e+00	1.8976819e-02	-2.5272453e-01	1.9575242e-01	5.5837075e-01
-1.3423451e+00	6.6764718e-02	-1.0752582e+00	-1.2635314e+00	1.5945917e-01	-1.4990538e+00	-1.0797164e-01	7.6345496e-01	8.2658966e-01
-1.0177107e+00	5.6602980e-01	-1.4231333e+00	9.9362487e-01	2.5168914e-01	9.7564203e-01	1.1611835e+00	1.1231307e+00	7.9642570e-01
1.3079265e+00	5.2035398e-01	1.4855202e+00	-8.5328914e-01	1.5556455e+00	-1.4980607e+00	4.3741461e-01	-1.3723493e+00	5.8587932e-01
5.9731886e-01	-6.0455829e-01	9.0152965e-01	1.3982272e-01	1.3994149e+00	-1.1821120e+00	3.0052153e-01	4.9839327e-01	7.3309519e-01
-1.3920766e+00	-9.0052816e-01	1.0738907e-01	8.9135792e-02	-1.1374769e+00	-3.2431568e-01	-8.1562920e-01	1.0096672e+00	1.0018253e+00
-1.1904637e+00	1.0166953e+00	-1.5275950e+00	-4.3443209e-01	-9.8340997e-01	-1.1041495e-01	-1.5112142e+00	-1.4071790e+00	7.1236647e-01
6.8062957e-01	4.7565851e-01	-1.1947582e+00	-4.3881751e-01	-2.5235785e-01	9.3722286e-01	8.0008818e-01	-5.4832626e-01	7.0020758e-01
8.0226081e-01	-9.6072132e-01	7.5940423e-01	1.2536480e+00	-2.2833460e-01	-4.0877763e-02	1.0654472e+00	-1.4282395e+00	2.2547475e-01
-1.1830725e-01	9.4306467e-01	-9.8398446e-01	-5.9929573e-01	1.4066546e+00	9.7622390e-01	-1.0703607e-01	4.8893831e-01	1.1539943e+00
2.3828285e-01	7.5294097e-01	-4.8312147e-01	-4.1725871e-01	1.1587667e+00	-1.1434018e+00	1.1773658e+00	-8.2018004e-01	1.0731559e+00
-7.1083360e-01	3.4367631e-01	1.1945155e+00	-8.3232497e-01	6.5934402e-01	-3.2266413e-02	-9.0585353e-01	5.4271290e-01	7.3857690e-01
4.9647133e-01	-1.2210727e+00	1.4441884e+00	6.2630882e-01	1.1975806e+00	1.1939254e+00	-5.2235126e-01	1.3323015e+00	3.7944568e-01
1.2355908e-01	1.4565464e+00	5.3026912e-01	-1.1047044e+00	-4.4617555e-01	9.5166881e-01	-1.5477202e+00	-1.2814703e+00	7.0471398e-01
6.4761953e-02	8.8562549e-01	-4.6524545e-01	4.5234389e-02	1.0924811e-01	8.4950101e-01	-1.4544201e-01	1.0872827e+00	8.6897865e-01
1.4630926e+00	-1.5844000e-01	4.3777425e-02	-1.1047916e-02	1.4429025e+00	-9.7516580e-01	-2.8477512e-01	-6.8487962e-01	8.5945126e-01
9.5162002e-01	1.1695569e+00	6.3449931e-01	-3.2835171e-01	9.0901579e-01	7.7199399e-02	-1.5699094e+00	2.3696234e-02	7.1679959e-01
2.9441986e-02	-2.0204096e-01	1.4644125e+00	1.1710908e+00	2.6335225e-01	1.2534850e-02	7.7006674e-01	-7.1966750e-01	3.0095577e-01
-1.5401748e+00	3.5929141e-01	1.1442814e+00	4.4464466e-01	-3.4280187e-01	1.8652377e-01	-8.5007283e-01	-3.1992589e-01	6.8130363e-01
1.0061333e+00	4.6959666e-01	-8.9331730e-01	-7.0609535e-01	2.0987609e-01	-4.0450725e-01	7.8929853e-01	1.4121543e+00	8.5878975e-01
-1.1116842e+00	8.3037650e-01	-3.1262941e-01	-1.5490265e+00	-6.2104956e-01	-1.4691747e-01	-1.2053190e+00	-6.5498812e-01	4.8717362e-01
-1.0250924e+00	1.1833349e+00	1.5220697e+00	-1.0936804e-01	1.5324067e+00	4.9939906e-02	-8.0652298e-01	-2.4459995e-01	7.6563779e-01
-2.3404947e-01	-1.1138224e+00	-5.6372557e-01	-3.1692461e-01	3.8213958e-01	5.3475939e-01	7.4050963e-01	1.3534153e+00	1.1608894e+00
-3.9536907e-01	7.3685614e-01	5.0783562e-01	-1.5524027e+00	1.2046185e+00	-3.9551720e-01	-1.2448051e+00	-1.4216194e+00	7.1814244e-01
-4.9953002e-01	1.8286360e-01	-5.1399588e-01	-3.0451624e-01	-1.5413024e+00	1.5255296e-01	1.5675685e+00	-1.3451751e+00	9.5814533e-01
-1.2654482e+00	9.1087142e-01	6.5098551e-01	-3.4996587e-01	9.0316210e-01	4.1805255e-01	7.2747452e-01	-1.4568508e+00	4.0269715e-01
1.9460486e-01	3.4944251e-02	-1.0537909e+00	-8.1491095e-01	-7.3036094e-01	-1.5335315e+00	-4.1432572e-01	2.8195822e-01	8.7970843e-01
3.2599866e-01	-1.6980098e-01	1.2351867e+00	1.1357153e+00	-9.7385816e-01	-4.3790319e-01	1.3385699e+00	1.3501615e+00	3.5810426e-01
1.2193362e-01	-1.2789381e+00	1.3934761e-01	-3.4974792e-01	6.3647362e-02	9.1260194e-01	3.9888308e-01	4.3978494e-01	9.1416956e-01
1.0199899e+00	-3.3630426e-01	1.5288063e+00	-2.9341922e-01	-1.5618824e+00	8.4552442e-01	-1.3074498e-01	-7.0210269e-01	3.7637893e-01
-7.0054795e-01	-5.4054948e-01	-4.3852905e-01	8.0362048e-01	5.9148315e-01	1.3054188e+00	-1.4575712e+00	-4.1787815e-01	9.3380104e-01
5.7986443e-01	4.7080908e-01	-1.8142052e-01	7.4263594e-01	1.0581279e+00	-7.0916984e-01	7.4099445e-01	1.3231587e+00	9.7466021e-01
5.6105853e-01	-7.8375726e-01	1.3518409e+00	-6.5325924e-02	-6.0056194e-01	1.8506088e-01	6.2052397e-01	-1.0056930e+00	2.5940381e-01
-1.3505060e+00	8.9793267e-02	3.9148280e-01	-1.5169754e+00	2.9262924e-01	1.4143696e-01	-9.4116886e-01	-9.1355659e-01	9.1728672e-01
5.2337455e-02	1.1909703e+00	1.1563430e+00	1.3598229e+00	-1.5145200e+00	-1.0546027e+00	-3.0598600e-01	-1.1823738e+00	5.9640021e-01
-1.0345017e-02	1.5514186e+00	7.6413970e-01	-5.4266742e-01	-1.3546937e+00	1.5771566e-01	8.0541143e-02	1.5589049e+00	3.8919231e-01
-1.0811074e+00	-5.2720099e-01	6.5099554e-02	-5.6785885e-01	-1.2152414e+00	-7.7707842e-01	-3.7144537e-01	-3.6740220e-01	7.0784949e-01
7.9986028e-01	-1.3757719e+00	8.5395942e-01	1.5480461e-01	-1.0689934e+00	-7.5628091e-01	-5.3775335e-01	1.4423194e+00	6.0813334e-01
3.7676208e-01	-4.7629414e-01	-1.4408744e+00	5.6228083e-01	1.9587492e-01	7.0546242e-02	3.4158994e-01	5.3385118e-01	8.7215078e-01
-1.2105215e+00	-2.9751948e-01	-1.3798338e+00	3.4323655e-01	-3.1929854e-01	1.2902630e+00	1.4124206e+00	4.8082382e-02	9.3988972e-01
-2.8004267e-01	1.0055978e+00	3.7068086e-01	8.1252781e-01	-6.1031229e-01	-9.6313986e-01	6.7957985e-01	7.3127771e-01	7.2287144e-01
-5.7127841e-01	-6.8653338e-01	2.5501640e-01	-3.4827883e-01	-2.1857012e-01	1.1353910e+00	-1.1323919e+00	6.7394655e-01	1.0326119e+00
-7.6911010e-01	5.0323440e-01	9.2830051e-01	-7.3513803e-01	-9.8617657e-01	4.8290808e-01	-3.4267953e-01	-1.5633805e+00	4.9234182e-01
1.2202625e+00	6.9312122e-01	7.9757498e-01	4.1911823e-01	3.7315521e-01	1.5022732e+00	-8.7555742e-01	5.4416127e-01	5.9345176e-01
6.3540794e-01	2.6283331e-01	-3.3319456e-01	6.6929451e-01	1.0006204e+00	-2.7529517e-01	-2.7356099e-01	5.4223032e-01	1.0719278e+00
1.0278203e+00	3.6008670e-01	1.4586975e+00	-1.2104988e+00	4.8206378e-01	6.8013420e-01	1.5521334e+00	-4.9535992e-01	3.5886352e-01
-1.0420918e+00	1.2696496e+00	-6.5980761e-01	1.0142874e-01	-1.2155153e-01	-1.2401458e+00	-1.0800130e+00	-2.9360491e-01	9.6496783e-01
-5.7454999e-02	1.3042664e+00	4.3549330e-01	-1.1720042e+00	-8.8130146e-01	1.3375247e+00	3.4307778e-01	8.2437628e-01	7.8206760e-01
-1.1772308e+00	-1.2277887e+00	-5.7503863e-01	-8.8723269e-02	5.7573797e-01	-1.4599671e+00	1.2857385e+00	8.6857855e-01	1.2847029e+00
3.3149031e-02	-1.4640541e+00	-1.1353036e+00	1.0845356e+00	3.2267792e-01	1.3130711e+00	1.5318581e+00	-7.8142336e-01	9.2741471e-01
1.0738643e+00	-1.4031690e+00	9.8615637e-01	2.7000443e-01	8.5896237e-01	-9.0257125e-01	5.8809496e-01	-1.5251276e+00	5.7117461e-01
-1.1996293e-02	8.7521379e-01	-7.1277909e-01	1.5046383e+00	9.6232446e-01	1.2359364e+00	6.6143789e-01	-5.6496017e-01	4.7437210e-01
-5.5977088e-01	7.8144381e-01	-7.8531961e-01	-1.3649829e+00	8.6814754e-01	1.7259759e-01	-1.3098292e+00	-1.3926612e+00	1.0893021e+00
1.0007477e+00	-1.2727105e+00	-1.0359752e+00	-1.3578161e+00	1.3994794e+00	1.1576115e+00	-1.1590226e+00	1.5492872e+00	7.8836470e-01
-5.2001891e-01	6.5862999e-01	-9.2859574e-01	-2.8584608e-01	-5.3621148e-02	9.3443849e-02	1.3233075e+00	1.3497176e+00	9.2659749e-01
-4.7061683e-02	-1.3781933e+00	5.2362996e-01	-7.1995192e-01	4.2646433e-01	-2.8555328e-01	1.4948072e+00	-7.3675653e-01	8.9248434e-01
7.1563746e-01	-3.3193755e-01	1.0477091e+00	1.1829789e+00	-1.5284319e+00	1.0595963e+00	-9.1978681e-02	1.4912095e+00	3.6187581e-01
-1.4395008e+00	5.9413110e-01	2.1992611e-01	-8.1306273e-01	4.4747052e-01	-1.0529024e+00	-2.2210857e-01	-8.6883281e-01	8.3696721e-01
-2.8459855e-01	-1.5616828e+00	-1.3563836e+00	7.8277282e-01	-3.3579962e-01	4.6002791e-01	-7.6660724e-01	-3.5044720e-01	7.8154579e-01
1.3977980e+00	8.0460141e-01	-1.3432546e+00	-9.2726392e-01	-1.4837786e+00	2.2955242e-01	-6.9639739e-01	5.2018995e-01	5.5145499e-01
-3.8683926e-02	1.5210480e+00	-5.9473986e-01	9.1652999e-01	9.6282544e-02	2.1177719e-01	1.2233202e+00	-2.1993557e-01	5.6524888e-01
1.4893561e-01	1.1140113e+00	7.5503624e-01	8.9070245e-01	3.0049569e-01	-8.5187040e-02	-1.3811871e+00	1.1974761e+00	7.6913460e-01
-6.8859056e-01	-7.0435592e-01	1.0012908e+00	3.4710966e-01	-1.2499140e+00	8.2766743e-01	-3.8281598e-01	9.3885378e-01	6.8055407e-01
4.8587225e-01	-5.8888196e-01	-8.1704551e-01	-6.5496752e-02	5.2468875e-01	-3.6577679e-01	-6.4399475e-03	-9.0441982e-01	1.0300484e+00
1.0556529e+00	-1.3222040e+00	-1.8236228e-01	-1.2464868e+00	-6.6914480e-03	4.8625550e-01	-1.4220478e+00	-1.5586639e+00	8.4929617e-01
-1.3573778e+00	1.3435258e+00	1.2315070e+00	-1.5637339e+00	6.3416885e-01	1.2137653e+00	8.8008312e-01	1.2774465e+00	5.4475037e-01
7.9782929e-01	-1.1292045e+00	1.1250602e+00	8.8775200e-01	-9.4808570e-01	1.3919066e+00	9.3881737e-01	3.9851864e-01	5.0021835e-01
7.9938903e-01	-1.7826126e-01	-3.5858414e-01	1.0242847e+00	-3.1837199e-01	1.4748195e+00	-1.5163477e+00	2.7310254e-02	7.7516373e-01
-1.2604218e+00	1.0423150e+00	-1.1488610e+00	-7.7462645e-01	-7.4580886e-01	1.2586583e-01	-6.5536584e-01	3.3091665e-01	7.5446659e-01
-1.4963050e-01	6.6817391e-01	-6.7869280e-01	-3.8681286e-01	1.4525589e-01	1.1352171e+00	-3.0987084e-01	1.0970796e+00	9.4495759e-01
-1.5657541e+00	-1.1949101e+00	3.3311298e-01	-1.2084733e+00	2.9822851e-01	7.0097667e-01	7.6142503e-01	6.0932575e-01	1.1276495e+00
1.4929148e+00	1.3473636e+00	3.1171258e-01	-4.1494945e-01	1.4862352e+00	3.4251849e-01	1.5635343e+00	-6.5418325e-01	5.5978226e-01
-4.8162074e-01	5.4070413e-01	-1.2231662e+00	2.8034647e-01	3.5235651e-01	1.3104857e+00	-1.1023701e+00	7.1635209e-01	1.0556146e+00
1.2844471e+00	-1.0133066e+00	8.2865791e-01	-6.0584516e-01	1.5363171e-01	-3.7319854e-01	-1.5619907e+00	1.1464769e+00	2.6973324e-01
-1.3229196e+00	-7.0608838e-02	5.7328843e-01	-5.3778779e-01	-3.0092853e-01	1.4126237e+00	-1.2287366e+00	1.4489920e+00	8.1721626e-01
-1.2587532e+00	7.9928975e-01	-6.0244495e-03	-2.3736636e-01	2.5831798e-01	9.5082240e-01	1.4539873e+00	-4.1846458e-01	1.4810543e-01
-3.7953418e-01	2.1267912e-01	-7.2195831e-01	4.0617666e-01	-1.3074764e-01	-8.0980309e-01	-1.2841958e+00	8.9183680e-01	8.9413804e-01
-1.3978096e+00	-6.3438892e-01	-1.1224044e+00	-6.9758256e-02	-1.5022462e+00	-9.8121678e-01	-7.3755060e-01	5.6249379e-01	1.2627687e+00
-1.5535876e-01	3.9094244e-01	1.0129898e+00	-6.1294968e-01	7.2792211e-01	-1.0905629e+00	7.1176060e-01	7.8081194e-01	7.8740365e-01
-4.5123230e-01	1.4993478e+00	1.0298155e+00	-5.6302878e-01	8.2513456e-01	-1.0388875e+00	-6.2434585e-01	6.7373225e-01	4.8862115e-01
-5.6603903e-02	8.2298596e-01	1.0749285e+00	-3.4764566e-01	1.0465492e+00	3.8929882e-01	-4.6120571e-01	1.1180656e+00	7.8526282e-01
5.6077717e-01	-5.0746783e-01	-9.7557148e-01	4.8174699e-01	-4.2558762e-01	-9.9219406e-01	-1.1753504e+00	1.4630472e+00	8.2484085e-01
2.0400747e-01	4.1231925e-01	-4.5783576e-01	8.3745842e-01	5.5541939e-01	-2.3175543e-01	2.2031497e-01	1.8899685e-01	9.6771820e-01
1.2760152e+00	-5.0378662e-01	-1.0851898e+00	8.2860428e-01	1.2619702e+00	4.6142271e-01	-1.1040037e+00	3.1980420e-01	1.1913472e+00
1.4763346e+00	-5.4949457e-01	1.3015317e+00	-3.2803150e-01	1.0418691e+00	-1.4607568e+00	-7.4319742e-01	-3.1582864e-01	5.8005114e-01
4.5616254e-01	9.2722491e-01	-6.5634009e-02	2.6968878e-01	-5.4298643e-01	6.0652348e-01	5.3364373e-02	1.1596256e+00	5.9593954e-01
1.2376928e+00	1.5694433e+00	-4.1176961e-01	-6.5881551e-01	3.5372928e-01	-6.2810770e-01	1.5411152e+00	-6.1343646e-01	9.5674016e-01
1.4177822e+00	8.2108592e-01	3.1671427e-01	1.4017520e+00	1.2347784e+00	-8.5471566e-01	-9.0834586e-01	6.8053373e-01	6.2255872e-01
-3.1416099e-01	-1.0254308e+00	1.1587155e+00	4.4313933e-01	-4.3982168e-01	1.2970801e+00	-1.5701573e+00	-8.0852463e-01	4.4374094e-01
9.1351892e-01	3.6153613e-01	-2.0086601e-01	-8.7352601e-01	8.4470613e-02	5.1356940e-01	-2.5625069e-01	-1.4852601e+00	7.1404062e-01
5.4912880e-01	4.9757636e-01	1.2570951e+00	-6.8920515e-01	-3.0229476e-01	-1.5357745e+00	3.1810613e-01	3.2790318e-01	6.3169857e-01
-7.9151950e-01	-1.5378556e-01	7.8594982e-01	-4.1885286e-01	-7.1272698e-01	-4.3674698e-01	-5.8103871e-01	7.1515823e-01	7.1557246e-01
-1.5649070e+00	8.5680155e-01	-9.3852165e-01	6.4911962e-01	9.0503325e-02	1.4955165e+00	-1.4475766e+00	-6.9092579e-02	9.9399162e-01
2.1198763e-02	-7.9706994e-01	2.0333027e-01	-9.9778883e-01	5.5854471e-01	-7.3706674e-01	-9.2668866e-01	1.1503135e+00	2.0132603e-01
1.2876457e+00	-6.0346971e-01	-6.8092186e-01	-1.5287625e-02	3.8201988e-01	-5.8085349e-01	1.1600052e+00	-4.1870172e-02	1.0583007e+00
-9.7122016e-01	-1.4543812e+00	5.6826618e-01	6.7148646e-01	-8.0730814e-01	-1.4762987e+00	-5.1632506e-01	4.7772460e-03	1.0702419e+00
4.1826056e-01	9.4804704e-01	4.0808792e-01	1.0721372e+00	1.1077262e-01	1.4669259e-01	-7.9641695e-01	-1.3902349e+00	4.2455749e-01
-1.1790611e+00	-3.3137105e-01	6.3696116e-01	-7.6533732e-01	-1.2089450e+00	-6.8782774e-01	9.4664650e-01	1.4881093e+00	5.1961348e-01
6.8708881e-01	6.9054990e-01	-1.1414776e+00	-1.3439320e+00	1.0823536e+00	7.4016173e-01	1.2624824e+00	4.3399391e-01	7.8868839e-01
-5.9296577e-01	1.0289322e+00	8.9251745e-01	5.8551459e-01	1.2959332e+00	-8.0869251e-01	2.2435474e-01	-6.4252207e-01	8.5726948e-01
-8.4384128e-01	-1.2042205e+00	-5.6408666e-01	1.2755629e+00	8.7841223e-02	-1.1651790e+00	8.1887915e-01	-1.2144767e+00	8.4446285e-01
-1.2911464e+00	-1.1941169e+00	7.2207275e-01	1.5728531e-01	-2.0111909e-01	1.5252321e+00	-4.1551853e-01	-7.8217500e-01	4.2035337e-01
-1.3164272e+00	-1.0292375e+00	-9.5726569e-02	1.4147657e+00	1.4521394e-01	-8.2029044e-01	1.4050656e-01	1.5500715e+00	1.0657501e+00
[truncated: 6,193 more rows]
