# Supplementary material
Source: ML conference proceedings conference paper supplement (https://proceedings.neurips.cc/paper_files/paper/2020/hash/aab085461de182608ee9f607f3f7d18f-Abstract.html)
Supplement: Supplementary file 16 [file aab085461de182608ee9f607f3f7d18f-Supplemental.zip › supplemental/evidential_regression/data/uci/naval/data.txt]

   1.1380000e+00   3.0000000e+00   2.8996400e+02   1.3494890e+03   6.6773800e+03   7.5840000e+00   7.5840000e+00   4.6400600e+02   2.8800000e+02   5.5056300e+02   1.0960000e+00   9.9800000e-01   5.9470000e+00   1.0190000e+00   7.1370000e+00   8.2000000e-02   9.5000000e-01   9.7500000e-01
   2.0880000e+00   6.0000000e+00   6.9601800e+03   1.3761660e+03   6.8284690e+03   2.8204000e+01   2.8204000e+01   6.3540100e+02   2.8800000e+02   5.8165800e+02   1.3310000e+00   9.9800000e-01   7.2820000e+00   1.0190000e+00   1.0655000e+01   2.8700000e-01   9.5000000e-01   9.7500000e-01
   3.1440000e+00   9.0000000e+00   8.3792290e+03   1.3867570e+03   7.1118110e+03   6.0358000e+01   6.0358000e+01   6.0600200e+02   2.8800000e+02   5.8758700e+02   1.3890000e+00   9.9800000e-01   7.5740000e+00   1.0200000e+00   1.3086000e+01   2.5900000e-01   9.5000000e-01   9.7500000e-01
   4.1610000e+00   1.2000000e+01   1.4724395e+04   1.5474650e+03   7.7926300e+03   1.1377400e+02   1.1377400e+02   6.6147100e+02   2.8800000e+02   6.1385100e+02   1.6580000e+00   9.9800000e-01   9.0070000e+00   1.0220000e+00   1.8109000e+01   3.5800000e-01   9.5000000e-01   9.7500000e-01
   5.1400000e+00   1.5000000e+01   2.1636432e+04   1.9243130e+03   8.4947770e+03   1.7530600e+02   1.7530600e+02   7.3149400e+02   2.8800000e+02   6.4564200e+02   2.0780000e+00   9.9800000e-01   1.1197000e+01   1.0260000e+00   2.6373000e+01   5.2200000e-01   9.5000000e-01   9.7500000e-01
   6.1750000e+00   1.8000000e+01   2.9792731e+04   2.3074040e+03   8.8283600e+03   2.4627800e+02   2.4627800e+02   8.0043400e+02   2.8800000e+02   6.7639700e+02   2.5010000e+00   9.9800000e-01   1.3356000e+01   1.0300000e+00   3.5760000e+01   7.0800000e-01   9.5000000e-01   9.7500000e-01
   7.1480000e+00   2.1000000e+01   3.8982180e+04   2.6780860e+03   9.1324290e+03   3.3207700e+02   3.3207700e+02   8.5474700e+02   2.8800000e+02   6.9995400e+02   2.9630000e+00   9.9800000e-01   1.5679000e+01   1.0350000e+00   4.5881000e+01   9.0800000e-01   9.5000000e-01   9.7500000e-01
   8.2060000e+00   2.4000000e+01   5.0996808e+04   3.0875610e+03   9.3185620e+03   4.3798900e+02   4.3798900e+02   9.5212200e+02   2.8800000e+02   7.4177000e+02   3.5760000e+00   9.9800000e-01   1.8632000e+01   1.0400000e+00   6.2440000e+01   1.2360000e+00   9.5000000e-01   9.7500000e-01
   9.3000000e+00   2.7000000e+01   7.2763329e+04   3.5603950e+03   9.7785280e+03   6.4490500e+02   6.4490500e+02   1.1157970e+03   2.8800000e+02   7.8909400e+02   4.4980000e+00   9.9800000e-01   2.2811000e+01   1.0490000e+00   9.2556000e+01   1.8320000e+00   9.5000000e-01   9.7500000e-01
   1.1380000e+00   3.0000000e+00   3.7988000e+02   1.3553750e+03   6.6839160e+03   7.9150000e+00   7.9150000e+00   4.6401700e+02   2.8800000e+02   5.5098500e+02   1.1000000e+00   9.9800000e-01   5.9630000e+00   1.0190000e+00   3.8790000e+00   7.9000000e-02   9.5000000e-01   9.7600000e-01
   2.0880000e+00   6.0000000e+00   6.9691760e+03   1.3719400e+03   6.8284380e+03   2.7424000e+01   2.7424000e+01   6.3596000e+02   2.8800000e+02   5.8144000e+02   1.3300000e+00   9.9800000e-01   7.2720000e+00   1.0190000e+00   1.2785000e+01   2.8900000e-01   9.5000000e-01   9.7600000e-01
   3.1440000e+00   9.0000000e+00   8.3793070e+03   1.3867580e+03   7.1143960e+03   6.0353000e+01   6.0353000e+01   6.0516900e+02   2.8800000e+02   5.8743700e+02   1.3890000e+00   9.9800000e-01   7.5670000e+00   1.0200000e+00   1.3052000e+01   2.5800000e-01   9.5000000e-01   9.7600000e-01
   4.1610000e+00   1.2000000e+01   1.4724544e+04   1.5474660e+03   7.7946460e+03   1.1379500e+02   1.1379500e+02   6.6056800e+02   2.8800000e+02   6.1368800e+02   1.6570000e+00   9.9800000e-01   8.9980000e+00   1.0220000e+00   1.8066000e+01   3.5800000e-01   9.5000000e-01   9.7600000e-01
   5.1400000e+00   1.5000000e+01   2.1636777e+04   1.9243130e+03   8.4956970e+03   1.7531400e+02   1.7531400e+02   7.3049500e+02   2.8800000e+02   6.4545700e+02   2.0780000e+00   9.9800000e-01   1.1185000e+01   1.0260000e+00   2.6316000e+01   5.2100000e-01   9.5000000e-01   9.7600000e-01
   6.1750000e+00   1.8000000e+01   2.9792983e+04   2.3073880e+03   8.8293940e+03   2.4629500e+02   2.4629500e+02   7.9929800e+02   2.8800000e+02   6.7617000e+02   2.5010000e+00   9.9800000e-01   1.3342000e+01   1.0300000e+00   3.5687000e+01   7.0700000e-01   9.5000000e-01   9.7600000e-01
   7.1480000e+00   2.1000000e+01   3.8981896e+04   2.6780860e+03   9.1329320e+03   3.3220800e+02   3.3220800e+02   8.5370100e+02   2.8800000e+02   6.9977900e+02   2.9630000e+00   9.9800000e-01   1.5661000e+01   1.0350000e+00   4.5799000e+01   9.0700000e-01   9.5000000e-01   9.7600000e-01
   8.2060000e+00   2.4000000e+01   5.0997234e+04   3.0875830e+03   9.3189350e+03   4.3809800e+02   4.3809800e+02   9.5107300e+02   2.8800000e+02   7.4160500e+02   3.5750000e+00   9.9800000e-01   1.8611000e+01   1.0400000e+00   6.2342000e+01   1.2340000e+00   9.5000000e-01   9.7600000e-01
   9.3000000e+00   2.7000000e+01   7.2763515e+04   3.5604010e+03   9.7793110e+03   6.4496300e+02   6.4496300e+02   1.1148870e+03   2.8800000e+02   7.8894900e+02   4.4960000e+00   9.9800000e-01   2.2784000e+01   1.0490000e+00   9.2448000e+01   1.8300000e+00   9.5000000e-01   9.7600000e-01
   1.1380000e+00   3.0000000e+00   7.5302100e+02   1.3718860e+03   6.6978380e+03   8.8580000e+00   8.8580000e+00   4.7366500e+02   2.8800000e+02   5.5314300e+02   1.1170000e+00   9.9800000e-01   6.0470000e+00   1.0190000e+00   0.0000000e+00   8.8000000e-02   9.5000000e-01   9.7700000e-01
   2.0880000e+00   6.0000000e+00   6.9617260e+03   1.3710570e+03   6.8303640e+03   2.7259000e+01   2.7259000e+01   6.3513300e+02   2.8800000e+02   5.8124400e+02   1.3300000e+00   9.9800000e-01   7.2620000e+00   1.0190000e+00   1.3192000e+01   2.8900000e-01   9.5000000e-01   9.7700000e-01
   3.1440000e+00   9.0000000e+00   8.3794560e+03   1.3867590e+03   7.1169870e+03   6.0356000e+01   6.0356000e+01   6.0433800e+02   2.8800000e+02   5.8728600e+02   1.3890000e+00   9.9800000e-01   7.5590000e+00   1.0200000e+00   1.3018000e+01   2.5800000e-01   9.5000000e-01   9.7700000e-01
   4.1610000e+00   1.2000000e+01   1.4724616e+04   1.5474660e+03   7.7966570e+03   1.1380100e+02   1.1380100e+02   6.5966600e+02   2.8800000e+02   6.1352400e+02   1.6570000e+00   9.9800000e-01   8.9890000e+00   1.0220000e+00   1.8023000e+01   3.5700000e-01   9.5000000e-01   9.7700000e-01
   5.1400000e+00   1.5000000e+01   2.1636925e+04   1.9243150e+03   8.4966100e+03   1.7528200e+02   1.7528200e+02   7.2949700e+02   2.8800000e+02   6.4527200e+02   2.0780000e+00   9.9800000e-01   1.1174000e+01   1.0260000e+00   2.6260000e+01   5.2000000e-01   9.5000000e-01   9.7700000e-01
   6.1750000e+00   1.8000000e+01   2.9793328e+04   2.3073770e+03   8.8304330e+03   2.4622000e+02   2.4622000e+02   7.9816600e+02   2.8800000e+02   6.7594300e+02   2.5010000e+00   9.9800000e-01   1.3328000e+01   1.0300000e+00   3.5613000e+01   7.0500000e-01   9.5000000e-01   9.7700000e-01
   7.1480000e+00   2.1000000e+01   3.8981432e+04   2.6780860e+03   9.1334320e+03   3.3210800e+02   3.3210800e+02   8.5265800e+02   2.8800000e+02   6.9960400e+02   2.9620000e+00   9.9800000e-01   1.5644000e+01   1.0350000e+00   4.5717000e+01   9.0500000e-01   9.5000000e-01   9.7700000e-01
   8.2060000e+00   2.4000000e+01   5.0997566e+04   3.0876010e+03   9.3193060e+03   4.3813400e+02   4.3813400e+02   9.5002700e+02   2.8800000e+02   7.4144100e+02   3.5740000e+00   9.9800000e-01   1.8589000e+01   1.0410000e+00   6.2245000e+01   1.2320000e+00   9.5000000e-01   9.7700000e-01
   9.3000000e+00   2.7000000e+01   7.2764565e+04   3.5604030e+03   9.7801030e+03   6.4507600e+02   6.4507600e+02   1.1139850e+03   2.8800000e+02   7.8880600e+02   4.4950000e+00   9.9800000e-01   2.2756000e+01   1.0490000e+00   9.2342000e+01   1.8280000e+00   9.5000000e-01   9.7700000e-01
   1.1380000e+00   3.0000000e+00   1.3417230e+03   1.3916030e+03   6.7141140e+03   1.0018000e+01   1.0018000e+01   4.9066100e+02   2.8800000e+02   5.5661700e+02   1.1420000e+00   9.9800000e-01   6.1850000e+00   1.0190000e+00   0.0000000e+00   1.0700000e-01   9.5000000e-01   9.7800000e-01
   2.0880000e+00   6.0000000e+00   6.8953210e+03   1.3668430e+03   6.8303170e+03   2.6481000e+01   2.6481000e+01   6.3365100e+02   2.8800000e+02   5.8076100e+02   1.3260000e+00   9.9800000e-01   7.2390000e+00   1.0190000e+00   1.5319000e+01   2.8900000e-01   9.5000000e-01   9.7800000e-01
   3.1440000e+00   9.0000000e+00   8.3795480e+03   1.3867590e+03   7.1195750e+03   6.0351000e+01   6.0351000e+01   6.0350900e+02   2.8800000e+02   5.8713600e+02   1.3890000e+00   9.9800000e-01   7.5520000e+00   1.0200000e+00   1.2983000e+01   2.5700000e-01   9.5000000e-01   9.7800000e-01
   4.1610000e+00   1.2000000e+01   1.4724731e+04   1.5474670e+03   7.7986730e+03   1.1379700e+02   1.1379700e+02   6.5876600e+02   2.8800000e+02   6.1336100e+02   1.6570000e+00   9.9800000e-01   8.9800000e+00   1.0220000e+00   1.7980000e+01   3.5600000e-01   9.5000000e-01   9.7800000e-01
   5.1400000e+00   1.5000000e+01   2.1636973e+04   1.9243180e+03   8.4975210e+03   1.7530000e+02   1.7530000e+02   7.2850100e+02   2.8800000e+02   6.4508800e+02   2.0780000e+00   9.9800000e-01   1.1162000e+01   1.0260000e+00   2.6203000e+01   5.1900000e-01   9.5000000e-01   9.7800000e-01
   6.1750000e+00   1.8000000e+01   2.9793658e+04   2.3073650e+03   8.8314710e+03   2.4628800e+02   2.4628800e+02   7.9703700e+02   2.8800000e+02   6.7571800e+02   2.5000000e+00   9.9800000e-01   1.3315000e+01   1.0300000e+00   3.5540000e+01   7.0400000e-01   9.5000000e-01   9.7800000e-01
   7.1480000e+00   2.1000000e+01   3.8981087e+04   2.6780870e+03   9.1339330e+03   3.3219700e+02   3.3219700e+02   8.5161800e+02   2.8800000e+02   6.9942900e+02   2.9610000e+00   9.9800000e-01   1.5627000e+01   1.0350000e+00   4.5636000e+01   9.0400000e-01   9.5000000e-01   9.7800000e-01
   8.2060000e+00   2.4000000e+01   5.0997769e+04   3.0876170e+03   9.3196740e+03   4.3805200e+02   4.3805200e+02   9.4898400e+02   2.8800000e+02   7.4127700e+02   3.5740000e+00   9.9800000e-01   1.8568000e+01   1.0410000e+00   6.2148000e+01   1.2300000e+00   9.5000000e-01   9.7800000e-01
   9.3000000e+00   2.7000000e+01   7.2765436e+04   3.5604050e+03   9.7808870e+03   6.4504000e+02   6.4504000e+02   1.1130840e+03   2.8800000e+02   7.8866400e+02   4.4940000e+00   9.9800000e-01   2.2729000e+01   1.0490000e+00   9.2235000e+01   1.8260000e+00   9.5000000e-01   9.7800000e-01
   1.1380000e+00   3.0000000e+00   1.8361450e+03   1.4037140e+03   6.7251430e+03   1.0747000e+01   1.0747000e+01   5.0514700e+02   2.8800000e+02   5.5930000e+02   1.1630000e+00   9.9800000e-01   6.2930000e+00   1.0190000e+00   0.0000000e+00   1.2400000e-01   9.5000000e-01   9.7900000e-01
   2.0880000e+00   6.0000000e+00   6.8461470e+03   1.3642700e+03   6.8312940e+03   2.6018000e+01   2.6018000e+01   6.3216500e+02   2.8800000e+02   5.8039000e+02   1.3240000e+00   9.9800000e-01   7.2220000e+00   1.0190000e+00   1.6581000e+01   2.8800000e-01   9.5000000e-01   9.7900000e-01
   3.1440000e+00   9.0000000e+00   8.3796160e+03   1.3867600e+03   7.1221620e+03   6.0358000e+01   6.0358000e+01   6.0268000e+02   2.8800000e+02   5.8698600e+02   1.3880000e+00   9.9800000e-01   7.5440000e+00   1.0200000e+00   1.2949000e+01   2.5600000e-01   9.5000000e-01   9.7900000e-01
   4.1610000e+00   1.2000000e+01   1.4724795e+04   1.5474680e+03   7.8006880e+03   1.1379100e+02   1.1379100e+02   6.5786900e+02   2.8800000e+02   6.1319800e+02   1.6570000e+00   9.9800000e-01   8.9710000e+00   1.0220000e+00   1.7937000e+01   3.5500000e-01   9.5000000e-01   9.7900000e-01
   5.1400000e+00   1.5000000e+01   2.1637374e+04   1.9243180e+03   8.4984420e+03   1.7528300e+02   1.7528300e+02   7.2751000e+02   2.8800000e+02   6.4490400e+02   2.0770000e+00   9.9800000e-01   1.1151000e+01   1.0260000e+00   2.6147000e+01   5.1800000e-01   9.5000000e-01   9.7900000e-01
   6.1750000e+00   1.8000000e+01   2.9793951e+04   2.3073510e+03   8.8325060e+03   2.4625400e+02   2.4625400e+02   7.9591100e+02   2.8800000e+02   6.7549300e+02   2.5000000e+00   9.9800000e-01   1.3301000e+01   1.0300000e+00   3.5467000e+01   7.0200000e-01   9.5000000e-01   9.7900000e-01
   7.1480000e+00   2.1000000e+01   3.8980696e+04   2.6780860e+03   9.1344340e+03   3.3215400e+02   3.3215400e+02   8.5058000e+02   2.8800000e+02   6.9925500e+02   2.9610000e+00   9.9800000e-01   1.5610000e+01   1.0350000e+00   4.5555000e+01   9.0200000e-01   9.5000000e-01   9.7900000e-01
   8.2060000e+00   2.4000000e+01   5.0997922e+04   3.0876270e+03   9.3200400e+03   4.3799600e+02   4.3799600e+02   9.4794300e+02   2.8800000e+02   7.4111400e+02   3.5730000e+00   9.9800000e-01   1.8547000e+01   1.0410000e+00   6.2051000e+01   1.2280000e+00   9.5000000e-01   9.7900000e-01
   9.3000000e+00   2.7000000e+01   7.2766645e+04   3.5604050e+03   9.7816720e+03   6.4487900e+02   6.4487900e+02   1.1121880e+03   2.8800000e+02   7.8852300e+02   4.4930000e+00   9.9800000e-01   2.2701000e+01   1.0490000e+00   9.2129000e+01   1.8240000e+00   9.5000000e-01   9.7900000e-01
   1.1380000e+00   3.0000000e+00   2.2081830e+03   1.4100890e+03   6.7322480e+03   1.1143000e+01   1.1143000e+01   5.1596700e+02   2.8800000e+02   5.6121000e+02   1.1780000e+00   9.9800000e-01   6.3720000e+00   1.0190000e+00   0.0000000e+00   1.3600000e-01   9.5000000e-01   9.8000000e-01
   2.0880000e+00   6.0000000e+00   6.8385930e+03   1.3647960e+03   6.8341720e+03   2.6113000e+01   2.6113000e+01   6.3090200e+02   2.8800000e+02   5.8022200e+02   1.3240000e+00   9.9800000e-01   7.2140000e+00   1.0190000e+00   1.6216000e+01   2.8700000e-01   9.5000000e-01   9.8000000e-01
   3.1440000e+00   9.0000000e+00   8.3797290e+03   1.3867600e+03   7.1247530e+03   6.0361000e+01   6.0361000e+01   6.0185500e+02   2.8800000e+02   5.8683600e+02   1.3880000e+00   9.9800000e-01   7.5370000e+00   1.0200000e+00   1.2915000e+01   2.5600000e-01   9.5000000e-01   9.8000000e-01
   4.1610000e+00   1.2000000e+01   1.4724872e+04   1.5474680e+03   7.8027040e+03   1.1379800e+02   1.1379800e+02   6.5697400e+02   2.8800000e+02   6.1303500e+02   1.6560000e+00   9.9800000e-01   8.9620000e+00   1.0220000e+00   1.7894000e+01   3.5400000e-01   9.5000000e-01   9.8000000e-01
   5.1400000e+00   1.5000000e+01   2.1637135e+04   1.9243220e+03   8.4993450e+03   1.7532900e+02   1.7532900e+02   7.2651700e+02   2.8800000e+02   6.4472000e+02   2.0770000e+00   9.9800000e-01   1.1139000e+01   1.0260000e+00   2.6090000e+01   5.1600000e-01   9.5000000e-01   9.8000000e-01
   6.1750000e+00   1.8000000e+01   2.9794302e+04   2.3073440e+03   8.8335460e+03   2.4623600e+02   2.4623600e+02   7.9478900e+02   2.8800000e+02   6.7526800e+02   2.5000000e+00   9.9800000e-01   1.3287000e+01   1.0300000e+00   3.5393000e+01   7.0100000e-01   9.5000000e-01   9.8000000e-01
   7.1480000e+00   2.1000000e+01   3.8980287e+04   2.6780880e+03   9.1349340e+03   3.3219400e+02   3.3219400e+02   8.4954500e+02   2.8800000e+02   6.9908200e+02   2.9600000e+00   9.9800000e-01   1.5592000e+01   1.0350000e+00   4.5473000e+01   9.0000000e-01   9.5000000e-01   9.8000000e-01
   8.2060000e+00   2.4000000e+01   5.0998050e+04   3.0876340e+03   9.3204040e+03   4.3800400e+02   4.3800400e+02   9.4690600e+02   2.8800000e+02   7.4095200e+02   3.5720000e+00   9.9800000e-01   1.8525000e+01   1.0410000e+00   6.1954000e+01   1.2260000e+00   9.5000000e-01   9.8000000e-01
   9.3000000e+00   2.7000000e+01   7.2767018e+04   3.5604120e+03   9.7824420e+03   6.4484400e+02   6.4484400e+02   1.1112900e+03   2.8800000e+02   7.8838200e+02   4.4920000e+00   9.9800000e-01   2.2674000e+01   1.0490000e+00   9.2023000e+01   1.8220000e+00   9.5000000e-01   9.8000000e-01
   1.1380000e+00   3.0000000e+00   2.9519270e+03   1.4171780e+03   6.7401090e+03   1.1583000e+01   1.1583000e+01   5.3832200e+02   2.8800000e+02   5.6494300e+02   1.2070000e+00   9.9800000e-01   6.5280000e+00   1.0190000e+00   0.0000000e+00   1.6200000e-01   9.5000000e-01   9.8100000e-01
   2.0880000e+00   6.0000000e+00   6.8040760e+03   1.3637580e+03   6.8360620e+03   2.5915000e+01   2.5915000e+01   6.2936700e+02   2.8800000e+02   5.7993100e+02   1.3230000e+00   9.9800000e-01   7.2000000e+00   1.0190000e+00   1.6701000e+01   2.8600000e-01   9.5000000e-01   9.8100000e-01
   3.1440000e+00   9.0000000e+00   8.3798290e+03   1.3867610e+03   7.1273430e+03   6.0364000e+01   6.0364000e+01   6.0103000e+02   2.8800000e+02   5.8668600e+02   1.3880000e+00   9.9800000e-01   7.5300000e+00   1.0200000e+00   1.2881000e+01   2.5500000e-01   9.5000000e-01   9.8100000e-01
   4.1610000e+00   1.2000000e+01   1.4724969e+04   1.5474690e+03   7.8047260e+03   1.1380200e+02   1.1380200e+02   6.5608100e+02   2.8800000e+02   6.1287200e+02   1.6560000e+00   9.9800000e-01   8.9530000e+00   1.0220000e+00   1.7852000e+01   3.5300000e-01   9.5000000e-01   9.8100000e-01
   5.1400000e+00   1.5000000e+01   2.1637620e+04   1.9243230e+03   8.5002680e+03   1.7533600e+02   1.7533600e+02   7.2553100e+02   2.8800000e+02   6.4453700e+02   2.0770000e+00   9.9800000e-01   1.1128000e+01   1.0260000e+00   2.6034000e+01   5.1500000e-01   9.5000000e-01   9.8100000e-01
   6.1750000e+00   1.8000000e+01   2.9794580e+04   2.3073300e+03   8.8345800e+03   2.4631500e+02   2.4631500e+02   7.9367100e+02   2.8800000e+02   6.7504400e+02   2.4990000e+00   9.9800000e-01   1.3273000e+01   1.0300000e+00   3.5321000e+01   6.9900000e-01   9.5000000e-01   9.8100000e-01
   7.1480000e+00   2.1000000e+01   3.8979934e+04   2.6780880e+03   9.1354340e+03   3.3205800e+02   3.3205800e+02   8.4851300e+02   2.8800000e+02   6.9890900e+02   2.9600000e+00   9.9800000e-01   1.5575000e+01   1.0350000e+00   4.5392000e+01   8.9900000e-01   9.5000000e-01   9.8100000e-01
   8.2060000e+00   2.4000000e+01   5.0998096e+04   3.0876370e+03   9.3207660e+03   4.3805400e+02   4.3805400e+02   9.4587100e+02   2.8800000e+02   7.4079000e+02   3.5710000e+00   9.9800000e-01   1.8504000e+01   1.0410000e+00   6.1857000e+01   1.2250000e+00   9.5000000e-01   9.8100000e-01
   9.3000000e+00   2.7000000e+01   7.2767717e+04   3.5604170e+03   9.7832130e+03   6.4480100e+02   6.4480100e+02   1.1103960e+03   2.8800000e+02   7.8824200e+02   4.4900000e+00   9.9800000e-01   2.2647000e+01   1.0490000e+00   9.1917000e+01   1.8200000e+00   9.5000000e-01   9.8100000e-01
   1.1380000e+00   3.0000000e+00   3.7748120e+03   1.4188860e+03   6.7443530e+03   1.1699000e+01   1.1699000e+01   5.6254300e+02   2.8800000e+02   5.6868400e+02   1.2360000e+00   9.9800000e-01   6.6880000e+00   1.0190000e+00   0.0000000e+00   1.9100000e-01   9.5000000e-01   9.8200000e-01
   2.0880000e+00   6.0000000e+00   6.6067140e+03   1.3589280e+03   6.8356490e+03   2.5032000e+01   2.5032000e+01   6.2459700e+02   2.8800000e+02   5.7897500e+02   1.3160000e+00   9.9800000e-01   7.1550000e+00   1.0190000e+00   1.8868000e+01   2.8200000e-01   9.5000000e-01   9.8200000e-01
   3.1440000e+00   9.0000000e+00   8.3799280e+03   1.3867610e+03   7.1299340e+03   6.0365000e+01   6.0365000e+01   6.0020800e+02   2.8800000e+02   5.8653600e+02   1.3880000e+00   9.9800000e-01   7.5220000e+00   1.0200000e+00   1.2847000e+01   2.5400000e-01   9.5000000e-01   9.8200000e-01
   4.1610000e+00   1.2000000e+01   1.4725068e+04   1.5474700e+03   7.8067480e+03   1.1379400e+02   1.1379400e+02   6.5519000e+02   2.8800000e+02   6.1271000e+02   1.6560000e+00   9.9800000e-01   8.9430000e+00   1.0220000e+00   1.7809000e+01   3.5300000e-01   9.5000000e-01   9.8200000e-01
   5.1400000e+00   1.5000000e+01   2.1637728e+04   1.9243250e+03   8.5011810e+03   1.7528800e+02   1.7528800e+02   7.2454600e+02   2.8800000e+02   6.4435400e+02   2.0760000e+00   9.9800000e-01   1.1116000e+01   1.0260000e+00   2.5977000e+01   5.1400000e-01   9.5000000e-01   9.8200000e-01
   6.1750000e+00   1.8000000e+01   2.9794844e+04   2.3073170e+03   8.8356130e+03   2.4624600e+02   2.4624600e+02   7.9255600e+02   2.8800000e+02   6.7482100e+02   2.4990000e+00   9.9800000e-01   1.3259000e+01   1.0300000e+00   3.5248000e+01   6.9800000e-01   9.5000000e-01   9.8200000e-01
   7.1480000e+00   2.1000000e+01   3.8979558e+04   2.6780880e+03   9.1359330e+03   3.3215200e+02   3.3215200e+02   8.4748300e+02   2.8800000e+02   6.9873600e+02   2.9590000e+00   9.9800000e-01   1.5558000e+01   1.0350000e+00   4.5312000e+01   8.9700000e-01   9.5000000e-01   9.8200000e-01
   8.2060000e+00   2.4000000e+01   5.0998040e+04   3.0876370e+03   9.3211260e+03   4.3803100e+02   4.3803100e+02   9.4483800e+02   2.8800000e+02   7.4062800e+02   3.5700000e+00   9.9800000e-01   1.8482000e+01   1.0410000e+00   6.1761000e+01   1.2230000e+00   9.5000000e-01   9.8200000e-01
   9.3000000e+00   2.7000000e+01   7.2768206e+04   3.5604230e+03   9.7839760e+03   6.4496500e+02   6.4496500e+02   1.1095030e+03   2.8800000e+02   7.8810300e+02   4.4890000e+00   9.9800000e-01   2.2619000e+01   1.0490000e+00   9.1811000e+01   1.8170000e+00   9.5000000e-01   9.8200000e-01
   1.1380000e+00   3.0000000e+00   4.0537350e+03   1.4178870e+03   6.7464700e+03   1.1648000e+01   1.1648000e+01   5.7047400e+02   2.8800000e+02   5.6965300e+02   1.2450000e+00   9.9800000e-01   6.7300000e+00   1.0190000e+00   0.0000000e+00   2.0000000e-01   9.5000000e-01   9.8300000e-01
   2.0880000e+00   6.0000000e+00   6.5630760e+03   1.3582340e+03   6.8377770e+03   2.4908000e+01   2.4908000e+01   6.2274400e+02   2.8800000e+02   5.7863700e+02   1.3140000e+00   9.9800000e-01   7.1390000e+00   1.0190000e+00   1.9074000e+01   2.8000000e-01   9.5000000e-01   9.8300000e-01
   3.1440000e+00   9.0000000e+00   8.3800790e+03   1.3867620e+03   7.1325300e+03   6.0363000e+01   6.0363000e+01   5.9938700e+02   2.8800000e+02   5.8638700e+02   1.3880000e+00   9.9800000e-01   7.5150000e+00   1.0200000e+00   1.2813000e+01   2.5400000e-01   9.5000000e-01   9.8300000e-01
   4.1610000e+00   1.2000000e+01   1.4725087e+04   1.5474700e+03   7.8087650e+03   1.1380200e+02   1.1380200e+02   6.5430100e+02   2.8800000e+02   6.1254800e+02   1.6560000e+00   9.9800000e-01   8.9340000e+00   1.0220000e+00   1.7767000e+01   3.5200000e-01   9.5000000e-01   9.8300000e-01
   5.1400000e+00   1.5000000e+01   2.1637989e+04   1.9243260e+03   8.5020990e+03   1.7532100e+02   1.7532100e+02   7.2356400e+02   2.8800000e+02   6.4417200e+02   2.0760000e+00   9.9800000e-01   1.1105000e+01   1.0260000e+00   2.5921000e+01   5.1300000e-01   9.5000000e-01   9.8300000e-01
   6.1750000e+00   1.8000000e+01   2.9795241e+04   2.3073110e+03   8.8366550e+03   2.4625500e+02   2.4625500e+02   7.9144400e+02   2.8800000e+02   6.7459900e+02   2.4990000e+00   9.9800000e-01   1.3246000e+01   1.0300000e+00   3.5176000e+01   6.9600000e-01   9.5000000e-01   9.8300000e-01
   7.1480000e+00   2.1000000e+01   3.8979213e+04   2.6780890e+03   9.1364330e+03   3.3204500e+02   3.3204500e+02   8.4645700e+02   2.8800000e+02   6.9856400e+02   2.9580000e+00   9.9800000e-01   1.5541000e+01   1.0350000e+00   4.5231000e+01   8.9600000e-01   9.5000000e-01   9.8300000e-01
   8.2060000e+00   2.4000000e+01   5.0997940e+04   3.0876340e+03   9.3214840e+03   4.3800400e+02   4.3800400e+02   9.4380900e+02   2.8800000e+02   7.4046700e+02   3.5690000e+00   9.9800000e-01   1.8461000e+01   1.0410000e+00   6.1664000e+01   1.2210000e+00   9.5000000e-01   9.8300000e-01
   9.3000000e+00   2.7000000e+01   7.2768423e+04   3.5604310e+03   9.7847320e+03   6.4502900e+02   6.4502900e+02   1.1086120e+03   2.8800000e+02   7.8796400e+02   4.4880000e+00   9.9800000e-01   2.2592000e+01   1.0490000e+00   9.1705000e+01   1.8150000e+00   9.5000000e-01   9.8300000e-01
   1.1380000e+00   3.0000000e+00   5.4498680e+03   1.4078440e+03   6.7432780e+03   1.1046000e+01   1.1046000e+01   6.1042600e+02   2.8800000e+02   5.7512100e+02   1.2880000e+00   9.9800000e-01   6.9750000e+00   1.0190000e+00   0.0000000e+00   2.4900000e-01   9.5000000e-01   9.8400000e-01
   2.0880000e+00   6.0000000e+00   6.4916930e+03   1.3567280e+03   6.8394110e+03   2.4629000e+01   2.4629000e+01   6.2037000e+02   2.8800000e+02   5.7817900e+02   1.3110000e+00   9.9800000e-01   7.1180000e+00   1.0190000e+00   1.9526000e+01   2.7800000e-01   9.5000000e-01   9.8400000e-01
   3.1440000e+00   9.0000000e+00   8.3801410e+03   1.3867630e+03   7.1351200e+03   6.0365000e+01   6.0365000e+01   5.9856800e+02   2.8800000e+02   5.8623700e+02   1.3880000e+00   9.9800000e-01   7.5080000e+00   1.0200000e+00   1.2780000e+01   2.5300000e-01   9.5000000e-01   9.8400000e-01
   4.1610000e+00   1.2000000e+01   1.4725170e+04   1.5474710e+03   7.8107900e+03   1.1379200e+02   1.1379200e+02   6.5341500e+02   2.8800000e+02   6.1238700e+02   1.6560000e+00   9.9800000e-01   8.9250000e+00   1.0220000e+00   1.7724000e+01   3.5100000e-01   9.5000000e-01   9.8400000e-01
   5.1400000e+00   1.5000000e+01   2.1638127e+04   1.9243280e+03   8.5030140e+03   1.7530400e+02   1.7530400e+02   7.2258300e+02   2.8800000e+02   6.4399000e+02   2.0760000e+00   9.9800000e-01   1.1093000e+01   1.0260000e+00   2.5865000e+01   5.1200000e-01   9.5000000e-01   9.8400000e-01
   6.1750000e+00   1.8000000e+01   2.9795502e+04   2.3073000e+03   8.8376870e+03   2.4633300e+02   2.4633300e+02   7.9033600e+02   2.8800000e+02   6.7437600e+02   2.4980000e+00   9.9800000e-01   1.3232000e+01   1.0300000e+00   3.5103000e+01   6.9500000e-01   9.5000000e-01   9.8400000e-01
   7.1480000e+00   2.1000000e+01   3.8978773e+04   2.6780880e+03   9.1369330e+03   3.3218100e+02   3.3218100e+02   8.4543100e+02   2.8800000e+02   6.9839200e+02   2.9580000e+00   9.9800000e-01   1.5524000e+01   1.0350000e+00   4.5150000e+01   8.9400000e-01   9.5000000e-01   9.8400000e-01
   8.2060000e+00   2.4000000e+01   5.0997820e+04   3.0876330e+03   9.3218420e+03   4.3806700e+02   4.3806700e+02   9.4278200e+02   2.8800000e+02   7.4030600e+02   3.5680000e+00   9.9800000e-01   1.8440000e+01   1.0410000e+00   6.1568000e+01   1.2190000e+00   9.5000000e-01   9.8400000e-01
   9.3000000e+00   2.7000000e+01   7.2770382e+04   3.5604210e+03   9.7855040e+03   6.4489200e+02   6.4489200e+02   1.1077320e+03   2.8800000e+02   7.8782700e+02   4.4870000e+00   9.9800000e-01   2.2565000e+01   1.0490000e+00   9.1601000e+01   1.8130000e+00   9.5000000e-01   9.8400000e-01
   1.1380000e+00   3.0000000e+00   6.3037400e+03   1.3969910e+03   6.7393850e+03   1.0400000e+01   1.0400000e+01   6.3416800e+02   2.8800000e+02   5.7805700e+02   1.3120000e+00   9.9800000e-01   7.1100000e+00   1.0190000e+00   0.0000000e+00   2.7800000e-01   9.5000000e-01   9.8500000e-01
   2.0880000e+00   6.0000000e+00   6.4204290e+03   1.3557850e+03   6.8413960e+03   2.4465000e+01   2.4465000e+01   6.1795400e+02   2.8800000e+02   5.7780000e+02   1.3090000e+00   9.9800000e-01   7.1010000e+00   1.0190000e+00   2.0263000e+01   2.7600000e-01   9.5000000e-01   9.8500000e-01
   3.1440000e+00   9.0000000e+00   8.3802580e+03   1.3867630e+03   7.1377150e+03   6.0371000e+01   6.0371000e+01   5.9775000e+02   2.8800000e+02   5.8608800e+02   1.3880000e+00   9.9800000e-01   7.5010000e+00   1.0200000e+00   1.2746000e+01   2.5200000e-01   9.5000000e-01   9.8500000e-01
   4.1610000e+00   1.2000000e+01   1.4725326e+04   1.5474710e+03   7.8128230e+03   1.1380600e+02   1.1380600e+02   6.5253100e+02   2.8800000e+02   6.1222600e+02   1.6550000e+00   9.9800000e-01   8.9160000e+00   1.0220000e+00   1.7682000e+01   3.5000000e-01   9.5000000e-01   9.8500000e-01
   5.1400000e+00   1.5000000e+01   2.1638294e+04   1.9243300e+03   8.5039300e+03   1.7532800e+02   1.7532800e+02   7.2160600e+02   2.8800000e+02   6.4380800e+02   2.0760000e+00   9.9800000e-01   1.1082000e+01   1.0260000e+00   2.5809000e+01   5.1100000e-01   9.5000000e-01   9.8500000e-01
   6.1750000e+00   1.8000000e+01   2.9795876e+04   2.3072940e+03   8.8387270e+03   2.4625600e+02   2.4625600e+02   7.8923100e+02   2.8800000e+02   6.7415500e+02   2.4980000e+00   9.9800000e-01   1.3218000e+01   1.0300000e+00   3.5031000e+01   6.9400000e-01   9.5000000e-01   9.8500000e-01
   7.1480000e+00   2.1000000e+01   3.8978199e+04   2.6780820e+03   9.1374430e+03   3.3204400e+02   3.3204400e+02   8.4439800e+02   2.8800000e+02   6.9822300e+02   2.9570000e+00   9.9800000e-01   1.5507000e+01   1.0350000e+00   4.5070000e+01   8.9200000e-01   9.5000000e-01   9.8500000e-01
   8.2060000e+00   2.4000000e+01   5.0997702e+04   3.0876310e+03   9.3221990e+03   4.3799000e+02   4.3799000e+02   9.4175900e+02   2.8800000e+02   7.4014600e+02   3.5670000e+00   9.9800000e-01   1.8419000e+01   1.0410000e+00   6.1472000e+01   1.2170000e+00   9.5000000e-01   9.8500000e-01
   9.3000000e+00   2.7000000e+01   7.2771461e+04   3.5604210e+03   9.7862620e+03   6.4481500e+02   6.4481500e+02   1.1068500e+03   2.8800000e+02   7.8769100e+02   4.4850000e+00   9.9800000e-01   2.2538000e+01   1.0490000e+00   9.1496000e+01   1.8110000e+00   9.5000000e-01   9.8500000e-01
   1.1380000e+00   3.0000000e+00   7.3256550e+03   1.3749930e+03   6.7286440e+03   9.0990000e+00   9.0990000e+00   6.6625700e+02   2.8800000e+02   5.8093000e+02   1.3340000e+00   9.9800000e-01   7.2450000e+00   1.0190000e+00   4.9890000e+00   3.2200000e-01   9.5000000e-01   9.8600000e-01
   2.0880000e+00   6.0000000e+00   6.3103310e+03   1.3543470e+03   6.8430800e+03   2.4201000e+01   2.4201000e+01   6.1450300e+02   2.8800000e+02   5.7721500e+02   1.3050000e+00   9.9800000e-01   7.0740000e+00   1.0190000e+00   2.0679000e+01   2.7200000e-01   9.5000000e-01   9.8600000e-01
   3.1440000e+00   9.0000000e+00   8.3803900e+03   1.3867640e+03   7.1403110e+03   6.0369000e+01   6.0369000e+01   5.9693500e+02   2.8800000e+02   5.8593900e+02   1.3880000e+00   9.9800000e-01   7.4930000e+00   1.0200000e+00   1.2712000e+01   2.5200000e-01   9.5000000e-01   9.8600000e-01
   4.1610000e+00   1.2000000e+01   1.4725397e+04   1.5474720e+03   7.8148500e+03   1.1378400e+02   1.1378400e+02   6.5164900e+02   2.8800000e+02   6.1206500e+02   1.6550000e+00   9.9800000e-01   8.9070000e+00   1.0220000e+00   1.7640000e+01   3.4900000e-01   9.5000000e-01   9.8600000e-01
   5.1400000e+00   1.5000000e+01   2.1638498e+04   1.9243310e+03   8.5048470e+03   1.7530000e+02   1.7530000e+02   7.2063100e+02   2.8800000e+02   6.4362700e+02   2.0750000e+00   9.9800000e-01   1.1071000e+01   1.0260000e+00   2.5754000e+01   5.1000000e-01   9.5000000e-01   9.8600000e-01
   6.1750000e+00   1.8000000e+01   2.9796172e+04   2.3072840e+03   8.8397610e+03   2.4633700e+02   2.4633700e+02   7.8813000e+02   2.8800000e+02   6.7393500e+02   2.4970000e+00   9.9800000e-01   1.3205000e+01   1.0300000e+00   3.4959000e+01   6.9200000e-01   9.5000000e-01   9.8600000e-01
   7.1480000e+00   2.1000000e+01   3.8977811e+04   2.6780790e+03   9.1379500e+03   3.3213800e+02   3.3213800e+02   8.4336700e+02   2.8800000e+02   6.9805300e+02   2.9570000e+00   9.9800000e-01   1.5490000e+01   1.0350000e+00   4.4989000e+01   8.9100000e-01   9.5000000e-01   9.8600000e-01
   8.2060000e+00   2.4000000e+01   5.0997591e+04   3.0876290e+03   9.3225560e+03   4.3799000e+02   4.3799000e+02   9.4073900e+02   2.8800000e+02   7.3998700e+02   3.5660000e+00   9.9800000e-01   1.8398000e+01   1.0410000e+00   6.1376000e+01   1.2150000e+00   9.5000000e-01   9.8600000e-01
   9.3000000e+00   2.7000000e+01   7.2771813e+04   3.5604290e+03   9.7870080e+03   6.4482500e+02   6.4482500e+02   1.1059670e+03   2.8800000e+02   7.8755500e+02   4.4840000e+00   9.9800000e-01   2.2511000e+01   1.0490000e+00   9.1391000e+01   1.8090000e+00   9.5000000e-01   9.8600000e-01
   1.1380000e+00   3.0000000e+00   7.4567720e+03   1.3634310e+03   6.7239930e+03   8.4350000e+00   8.4350000e+00   6.7206400e+02   2.8800000e+02   5.8095500e+02   1.3340000e+00   9.9800000e-01   7.2460000e+00   1.0190000e+00   1.1382000e+01   3.3300000e-01   9.5000000e-01   9.8700000e-01
   2.0880000e+00   6.0000000e+00   6.0896280e+03   1.3517790e+03   6.8440300e+03   2.3732000e+01   2.3732000e+01   6.0851000e+02   2.8800000e+02   5.7621100e+02   1.2980000e+00   9.9800000e-01   7.0270000e+00   1.0190000e+00   2.1587000e+01   2.6600000e-01   9.5000000e-01   9.8700000e-01
   3.1440000e+00   9.0000000e+00   8.3804890e+03   1.3867640e+03   7.1429060e+03   6.0376000e+01   6.0376000e+01   5.9612100e+02   2.8800000e+02   5.8579000e+02   1.3870000e+00   9.9800000e-01   7.4860000e+00   1.0200000e+00   1.2678000e+01   2.5100000e-01   9.5000000e-01   9.8700000e-01
   4.1610000e+00   1.2000000e+01   1.4725441e+04   1.5474730e+03   7.8168770e+03   1.1380900e+02   1.1380900e+02   6.5076900e+02   2.8800000e+02   6.1190400e+02   1.6550000e+00   9.9800000e-01   8.8980000e+00   1.0220000e+00   1.7598000e+01   3.4800000e-01   9.5000000e-01   9.8700000e-01
   5.1400000e+00   1.5000000e+01   2.1638563e+04   1.9243340e+03   8.5057600e+03   1.7533400e+02   1.7533400e+02   7.1965800e+02   2.8800000e+02   6.4344600e+02   2.0750000e+00   9.9800000e-01   1.1059000e+01   1.0260000e+00   2.5698000e+01   5.0900000e-01   9.5000000e-01   9.8700000e-01
   6.1750000e+00   1.8000000e+01   2.9796443e+04   2.3072760e+03   8.8407950e+03   2.4626800e+02   2.4626800e+02   7.8703200e+02   2.8800000e+02   6.7371400e+02   2.4970000e+00   9.9800000e-01   1.3191000e+01   1.0300000e+00   3.4887000e+01   6.9100000e-01   9.5000000e-01   9.8700000e-01
   7.1480000e+00   2.1000000e+01   3.8977355e+04   2.6780790e+03   9.1384560e+03   3.3216100e+02   3.3216100e+02   8.4233800e+02   2.8800000e+02   6.9788300e+02   2.9560000e+00   9.9800000e-01   1.5473000e+01   1.0350000e+00   4.4908000e+01   8.8900000e-01   9.5000000e-01   9.8700000e-01
   8.2060000e+00   2.4000000e+01   5.0997502e+04   3.0876260e+03   9.3229120e+03   4.3802500e+02   4.3802500e+02   9.3972200e+02   2.8800000e+02   7.3982800e+02   3.5660000e+00   9.9800000e-01   1.8376000e+01   1.0410000e+00   6.1281000e+01   1.2130000e+00   9.5000000e-01   9.8700000e-01
   9.3000000e+00   2.7000000e+01   7.2772940e+04   3.5604230e+03   9.7877580e+03   6.4506900e+02   6.4506900e+02   1.1050890e+03   2.8800000e+02   7.8742000e+02   4.4830000e+00   9.9800000e-01   2.2484000e+01   1.0490000e+00   9.1287000e+01   1.8070000e+00   9.5000000e-01   9.8700000e-01
   1.1380000e+00   3.0000000e+00   6.8105510e+03   1.3338350e+03   6.7074290e+03   6.7560000e+00   6.7560000e+00   6.6170800e+02   2.8800000e+02   5.7801500e+02   1.3080000e+00   9.9800000e-01   7.1070000e+00   1.0190000e+00   2.5580000e+01   3.2800000e-01   9.5000000e-01   9.8800000e-01
   2.0880000e+00   6.0000000e+00   6.1698290e+03   1.3529420e+03   6.8473420e+03   2.3940000e+01   2.3940000e+01   6.0954700e+02   2.8800000e+02   5.7642500e+02   1.3010000e+00   9.9800000e-01   7.0370000e+00   1.0190000e+00   2.1312000e+01   2.6700000e-01   9.5000000e-01   9.8800000e-01
   3.1440000e+00   9.0000000e+00   8.3805430e+03   1.3867650e+03   7.1454980e+03   6.0364000e+01   6.0364000e+01   5.9530800e+02   2.8800000e+02   5.8564100e+02   1.3870000e+00   9.9800000e-01   7.4790000e+00   1.0200000e+00   1.2645000e+01   2.5000000e-01   9.5000000e-01   9.8800000e-01
   4.1610000e+00   1.2000000e+01   1.4725555e+04   1.5474730e+03   7.8189110e+03   1.1380900e+02   1.1380900e+02   6.4989200e+02   2.8800000e+02   6.1174400e+02   1.6550000e+00   9.9800000e-01   8.8890000e+00   1.0220000e+00   1.7556000e+01   3.4800000e-01   9.5000000e-01   9.8800000e-01
   5.1400000e+00   1.5000000e+01   2.1638709e+04   1.9243360e+03   8.5066760e+03   1.7529900e+02   1.7529900e+02   7.1868700e+02   2.8800000e+02   6.4326500e+02   2.0750000e+00   9.9800000e-01   1.1048000e+01   1.0260000e+00   2.5642000e+01   5.0800000e-01   9.5000000e-01   9.8800000e-01
   6.1750000e+00   1.8000000e+01   2.9796753e+04   2.3072700e+03   8.8418300e+03   2.4629700e+02   2.4629700e+02   7.8593800e+02   2.8800000e+02   6.7349500e+02   2.4970000e+00   9.9800000e-01   1.3177000e+01   1.0300000e+00   3.4816000e+01   6.8900000e-01   9.5000000e-01   9.8800000e-01
   7.1480000e+00   2.1000000e+01   3.8977062e+04   2.6780770e+03   9.1389630e+03   3.3215800e+02   3.3215800e+02   8.4131300e+02   2.8800000e+02   6.9771400e+02   2.9550000e+00   9.9800000e-01   1.5456000e+01   1.0350000e+00   4.4828000e+01   8.8800000e-01   9.5000000e-01   9.8800000e-01
   8.2060000e+00   2.4000000e+01   5.0997385e+04   3.0876240e+03   9.3232670e+03   4.3812700e+02   4.3812700e+02   9.3870700e+02   2.8800000e+02   7.3967000e+02   3.5650000e+00   9.9800000e-01   1.8355000e+01   1.0410000e+00   6.1186000e+01   1.2110000e+00   9.5000000e-01   9.8800000e-01
   9.3000000e+00   2.7000000e+01   7.2773589e+04   3.5604290e+03   9.7885000e+03   6.4502100e+02   6.4502100e+02   1.1042130e+03   2.8800000e+02   7.8728600e+02   4.4820000e+00   9.9800000e-01   2.2457000e+01   1.0490000e+00   9.1183000e+01   1.8050000e+00   9.5000000e-01   9.8800000e-01
   1.1380000e+00   3.0000000e+00   4.8932430e+03   1.3127510e+03   6.6951910e+03   5.5980000e+00   5.5980000e+00   6.1536000e+02   2.8800000e+02   5.7058400e+02   1.2490000e+00   9.9800000e-01   6.7690000e+00   1.0190000e+00   3.3173000e+01   2.7800000e-01   9.5000000e-01   9.8900000e-01
   2.0880000e+00   6.0000000e+00   5.8641410e+03   1.3498400e+03   6.8479620e+03   2.3383000e+01   2.3383000e+01   6.0138300e+02   2.8800000e+02   5.7505300e+02   1.2910000e+00   9.9800000e-01   6.9750000e+00   1.0190000e+00   2.2212000e+01   2.5800000e-01   9.5000000e-01   9.8900000e-01
   3.1440000e+00   9.0000000e+00   8.3806980e+03   1.3867660e+03   7.1480980e+03   6.0366000e+01   6.0366000e+01   5.9449800e+02   2.8800000e+02   5.8549200e+02   1.3870000e+00   9.9800000e-01   7.4720000e+00   1.0200000e+00   1.2611000e+01   2.5000000e-01   9.5000000e-01   9.8900000e-01
   4.1610000e+00   1.2000000e+01   1.4725621e+04   1.5474740e+03   7.8209430e+03   1.1381300e+02   1.1381300e+02   6.4901700e+02   2.8800000e+02   6.1158400e+02   1.6550000e+00   9.9800000e-01   8.8810000e+00   1.0220000e+00   1.7514000e+01   3.4700000e-01   9.5000000e-01   9.8900000e-01
   5.1400000e+00   1.5000000e+01   2.1638765e+04   1.9243380e+03   8.5075900e+03   1.7535000e+02   1.7535000e+02   7.1771900e+02   2.8800000e+02   6.4308500e+02   2.0740000e+00   9.9800000e-01   1.1037000e+01   1.0260000e+00   2.5587000e+01   5.0600000e-01   9.5000000e-01   9.8900000e-01
   6.1750000e+00   1.8000000e+01   2.9797061e+04   2.3072620e+03   8.8428650e+03   2.4630500e+02   2.4630500e+02   7.8484600e+02   2.8800000e+02   6.7327600e+02   2.4960000e+00   9.9800000e-01   1.3164000e+01   1.0300000e+00   3.4745000e+01   6.8800000e-01   9.5000000e-01   9.8900000e-01
   7.1480000e+00   2.1000000e+01   3.8976661e+04   2.6780750e+03   9.1394690e+03   3.3207200e+02   3.3207200e+02   8.4029000e+02   2.8800000e+02   6.9754600e+02   2.9550000e+00   9.9800000e-01   1.5439000e+01   1.0350000e+00   4.4747000e+01   8.8600000e-01   9.5000000e-01   9.8900000e-01
   8.2060000e+00   2.4000000e+01   5.0997254e+04   3.0876230e+03   9.3236220e+03   4.3813300e+02   4.3813300e+02   9.3769600e+02   2.8800000e+02   7.3951300e+02   3.5640000e+00   9.9800000e-01   1.8334000e+01   1.0410000e+00   6.1091000e+01   1.2090000e+00   9.5000000e-01   9.8900000e-01
   9.3000000e+00   2.7000000e+01   7.2773853e+04   3.5604340e+03   9.7892310e+03   6.4505800e+02   6.4505800e+02   1.1033360e+03   2.8800000e+02   7.8715200e+02   4.4800000e+00   9.9800000e-01   2.2430000e+01   1.0490000e+00   9.1079000e+01   1.8030000e+00   9.5000000e-01   9.8900000e-01
   1.1380000e+00   3.0000000e+00   3.7162310e+03   1.3081450e+03   6.6936330e+03   5.3370000e+00   5.3370000e+00   5.8283300e+02   2.8800000e+02   5.6552700e+02   1.2120000e+00   9.9800000e-01   6.5500000e+00   1.0190000e+00   3.3388000e+01   2.4100000e-01   9.5000000e-01   9.9000000e-01
   2.0880000e+00   6.0000000e+00   5.6092420e+03   1.3478540e+03   6.8492890e+03   2.3017000e+01   2.3017000e+01   5.9439300e+02   2.8800000e+02   5.7395900e+02   1.2830000e+00   9.9800000e-01   6.9250000e+00   1.0190000e+00   2.2981000e+01   2.5000000e-01   9.5000000e-01   9.9000000e-01
   3.1440000e+00   9.0000000e+00   8.3808170e+03   1.3867660e+03   7.1506960e+03   6.0381000e+01   6.0381000e+01   5.9368900e+02   2.8800000e+02   5.8534300e+02   1.3870000e+00   9.9800000e-01   7.4640000e+00   1.0200000e+00   1.2577000e+01   2.4900000e-01   9.5000000e-01   9.9000000e-01
   4.1610000e+00   1.2000000e+01   1.4725672e+04   1.5474750e+03   7.8229750e+03   1.1381300e+02   1.1381300e+02   6.4814300e+02   2.8800000e+02   6.1142400e+02   1.6540000e+00   9.9800000e-01   8.8720000e+00   1.0220000e+00   1.7472000e+01   3.4600000e-01   9.5000000e-01   9.9000000e-01
   5.1400000e+00   1.5000000e+01   2.1639049e+04   1.9243390e+03   8.5085100e+03   1.7530400e+02   1.7530400e+02   7.1675400e+02   2.8800000e+02   6.4290500e+02   2.0740000e+00   9.9800000e-01   1.1026000e+01   1.0260000e+00   2.5532000e+01   5.0500000e-01   9.5000000e-01   9.9000000e-01
   6.1750000e+00   1.8000000e+01   2.9797330e+04   2.3072550e+03   8.8438980e+03   2.4636600e+02   2.4636600e+02   7.8375800e+02   2.8800000e+02   6.7305800e+02   2.4960000e+00   9.9800000e-01   1.3150000e+01   1.0300000e+00   3.4673000e+01   6.8700000e-01   9.5000000e-01   9.9000000e-01
   7.1480000e+00   2.1000000e+01   3.8976329e+04   2.6780770e+03   9.1399760e+03   3.3210100e+02   3.3210100e+02   8.3927000e+02   2.8800000e+02   6.9737800e+02   2.9540000e+00   9.9800000e-01   1.5423000e+01   1.0350000e+00   4.4667000e+01   8.8400000e-01   9.5000000e-01   9.9000000e-01
   8.2060000e+00   2.4000000e+01   5.0997156e+04   3.0876200e+03   9.3239770e+03   4.3803700e+02   4.3803700e+02   9.3668700e+02   2.8800000e+02   7.3935600e+02   3.5630000e+00   9.9800000e-01   1.8313000e+01   1.0410000e+00   6.0996000e+01   1.2080000e+00   9.5000000e-01   9.9000000e-01
   9.3000000e+00   2.7000000e+01   7.2774979e+04   3.5604340e+03   9.7899710e+03   6.4492700e+02   6.4492700e+02   1.1024660e+03   2.8800000e+02   7.8701900e+02   4.4790000e+00   9.9800000e-01   2.2404000e+01   1.0490000e+00   9.0975000e+01   1.8010000e+00   9.5000000e-01   9.9000000e-01
   1.1380000e+00   3.0000000e+00   2.6396880e+03   1.3076750e+03   6.6947150e+03   5.3040000e+00   5.3040000e+00   5.5101600e+02   2.8800000e+02   5.6064000e+02   1.1770000e+00   9.9800000e-01   6.3460000e+00   1.0190000e+00   3.2625000e+01   2.0400000e-01   9.5000000e-01   9.9100000e-01
   2.0880000e+00   6.0000000e+00   5.6122830e+03   1.3478860e+03   6.8518410e+03   2.3027000e+01   2.3027000e+01   5.9357700e+02   2.8800000e+02   5.7378600e+02   1.2830000e+00   9.9800000e-01   6.9180000e+00   1.0190000e+00   2.2796000e+01   2.5000000e-01   9.5000000e-01   9.9100000e-01
   3.1440000e+00   9.0000000e+00   8.3808940e+03   1.3867670e+03   7.1532920e+03   6.0370000e+01   6.0370000e+01   5.9288200e+02   2.8800000e+02   5.8519400e+02   1.3870000e+00   9.9800000e-01   7.4570000e+00   1.0200000e+00   1.2544000e+01   2.4800000e-01   9.5000000e-01   9.9100000e-01
   4.1610000e+00   1.2000000e+01   1.4725901e+04   1.5474750e+03   7.8250240e+03   1.1381100e+02   1.1381100e+02   6.4727300e+02   2.8800000e+02   6.1126500e+02   1.6540000e+00   9.9800000e-01   8.8630000e+00   1.0220000e+00   1.7430000e+01   3.4500000e-01   9.5000000e-01   9.9100000e-01
   5.1400000e+00   1.5000000e+01   2.1639262e+04   1.9243410e+03   8.5094280e+03   1.7530600e+02   1.7530600e+02   7.1579200e+02   2.8800000e+02   6.4272600e+02   2.0740000e+00   9.9800000e-01   1.1014000e+01   1.0260000e+00   2.5476000e+01   5.0400000e-01   9.5000000e-01   9.9100000e-01
   6.1750000e+00   1.8000000e+01   2.9797514e+04   2.3072470e+03   8.8449270e+03   2.4628400e+02   2.4628400e+02   7.8267300e+02   2.8800000e+02   6.7284000e+02   2.4960000e+00   9.9800000e-01   1.3137000e+01   1.0300000e+00   3.4602000e+01   6.8500000e-01   9.5000000e-01   9.9100000e-01
   7.1480000e+00   2.1000000e+01   3.8976119e+04   2.6780750e+03   9.1404830e+03   3.3214500e+02   3.3214500e+02   8.3825400e+02   2.8800000e+02   6.9721100e+02   2.9540000e+00   9.9800000e-01   1.5406000e+01   1.0350000e+00   4.4587000e+01   8.8300000e-01   9.5000000e-01   9.9100000e-01
   8.2060000e+00   2.4000000e+01   5.0997004e+04   3.0876200e+03   9.3243300e+03   4.3807400e+02   4.3807400e+02   9.3568200e+02   2.8800000e+02   7.3920000e+02   3.5620000e+00   9.9800000e-01   1.8292000e+01   1.0410000e+00   6.0901000e+01   1.2060000e+00   9.5000000e-01   9.9100000e-01
   9.3000000e+00   2.7000000e+01   7.2775879e+04   3.5604360e+03   9.7907040e+03   6.4504600e+02   6.4504600e+02   1.1015980e+03   2.8800000e+02   7.8688700e+02   4.4780000e+00   9.9800000e-01   2.2377000e+01   1.0490000e+00   9.0872000e+01   1.7990000e+00   9.5000000e-01   9.9100000e-01
   1.1380000e+00   3.0000000e+00   1.7469910e+03   1.3104360e+03   6.6978480e+03   5.4450000e+00   5.4450000e+00   5.2173600e+02   2.8800000e+02   5.5635000e+02   1.1470000e+00   9.9800000e-01   6.1730000e+00   1.0190000e+00   2.9309000e+01   1.6800000e-01   9.5000000e-01   9.9200000e-01
   2.0880000e+00   6.0000000e+00   5.2594250e+03   1.3461660e+03   6.8533520e+03   2.2708000e+01   2.2708000e+01   5.8369300e+02   2.8800000e+02   5.7225700e+02   1.2720000e+00   9.9800000e-01   6.8490000e+00   1.0190000e+00   2.3154000e+01   2.3900000e-01   9.5000000e-01   9.9200000e-01
   3.1440000e+00   9.0000000e+00   8.3810080e+03   1.3867670e+03   7.1558920e+03   6.0375000e+01   6.0375000e+01   5.9207600e+02   2.8800000e+02   5.8504600e+02   1.3870000e+00   9.9800000e-01   7.4500000e+00   1.0200000e+00   1.2510000e+01   2.4800000e-01   9.5000000e-01   9.9200000e-01
   4.1610000e+00   1.2000000e+01   1.4725856e+04   1.5474760e+03   7.8270520e+03   1.1381500e+02   1.1381500e+02   6.4640300e+02   2.8800000e+02   6.1110600e+02   1.6540000e+00   9.9800000e-01   8.8540000e+00   1.0220000e+00   1.7388000e+01   3.4400000e-01   9.5000000e-01   9.9200000e-01
   5.1400000e+00   1.5000000e+01   2.1639277e+04   1.9243430e+03   8.5103420e+03   1.7530500e+02   1.7530500e+02   7.1483100e+02   2.8800000e+02   6.4254600e+02   2.0740000e+00   9.9800000e-01   1.1003000e+01   1.0260000e+00   2.5421000e+01   5.0300000e-01   9.5000000e-01   9.9200000e-01
   6.1750000e+00   1.8000000e+01   2.9797827e+04   2.3072430e+03   8.8459640e+03   2.4632600e+02   2.4632600e+02   7.8159100e+02   2.8800000e+02   6.7262300e+02   2.4950000e+00   9.9800000e-01   1.3123000e+01   1.0300000e+00   3.4532000e+01   6.8400000e-01   9.5000000e-01   9.9200000e-01
   7.1480000e+00   2.1000000e+01   3.8975735e+04   2.6780760e+03   9.1409880e+03   3.3211100e+02   3.3211100e+02   8.3723900e+02   2.8800000e+02   6.9704400e+02   2.9530000e+00   9.9800000e-01   1.5389000e+01   1.0350000e+00   4.4508000e+01   8.8100000e-01   9.5000000e-01   9.9200000e-01
   8.2060000e+00   2.4000000e+01   5.0996889e+04   3.0876180e+03   9.3246840e+03   4.3797600e+02   4.3797600e+02   9.3468000e+02   2.8800000e+02   7.3904400e+02   3.5610000e+00   9.9800000e-01   1.8271000e+01   1.0410000e+00   6.0807000e+01   1.2040000e+00   9.5000000e-01   9.9200000e-01
   9.3000000e+00   2.7000000e+01   7.2775917e+04   3.5604400e+03   9.7914210e+03   6.4494600e+02   6.4494600e+02   1.1007270e+03   2.8800000e+02   7.8675500e+02   4.4770000e+00   9.9800000e-01   2.2350000e+01   1.0490000e+00   9.0768000e+01   1.7970000e+00   9.5000000e-01   9.9200000e-01
   1.1380000e+00   3.0000000e+00   5.3098900e+02   1.3243570e+03   6.7075120e+03   6.1810000e+00   6.1810000e+00   4.7394900e+02   2.8800000e+02   5.4971300e+02   1.1030000e+00   9.9800000e-01   5.9160000e+00   1.0190000e+00   1.9388000e+01   1.0800000e-01   9.5000000e-01   9.9300000e-01
   2.0880000e+00   6.0000000e+00   5.3025800e+03   1.3463130e+03   6.8560300e+03   2.2737000e+01   2.2737000e+01   5.8396200e+02   2.8800000e+02   5.7223700e+02   1.2730000e+00   9.9800000e-01   6.8480000e+00   1.0190000e+00   2.2888000e+01   2.3900000e-01   9.5000000e-01   9.9300000e-01
   3.1440000e+00   9.0000000e+00   8.3811350e+03   1.3867680e+03   7.1584930e+03   6.0377000e+01   6.0377000e+01   5.9127200e+02   2.8800000e+02   5.8489800e+02   1.3870000e+00   9.9800000e-01   7.4430000e+00   1.0200000e+00   1.2477000e+01   2.4700000e-01   9.5000000e-01   9.9300000e-01
   4.1610000e+00   1.2000000e+01   1.4725965e+04   1.5474770e+03   7.8290950e+03   1.1381000e+02   1.1381000e+02   6.4553700e+02   2.8800000e+02   6.1094700e+02   1.6540000e+00   9.9800000e-01   8.8450000e+00   1.0220000e+00   1.7346000e+01   3.4300000e-01   9.5000000e-01   9.9300000e-01
   5.1400000e+00   1.5000000e+01   2.1639548e+04   1.9243450e+03   8.5112620e+03   1.7532800e+02   1.7532800e+02   7.1387400e+02   2.8800000e+02   6.4236800e+02   2.0730000e+00   9.9800000e-01   1.0992000e+01   1.0260000e+00   2.5366000e+01   5.0200000e-01   9.5000000e-01   9.9300000e-01
   6.1750000e+00   1.8000000e+01   2.9797930e+04   2.3072330e+03   8.8469890e+03   2.4629500e+02   2.4629500e+02   7.8051300e+02   2.8800000e+02   6.7240600e+02   2.4950000e+00   9.9800000e-01   1.3110000e+01   1.0300000e+00   3.4461000e+01   6.8200000e-01   9.5000000e-01   9.9300000e-01
   7.1480000e+00   2.1000000e+01   3.8975494e+04   2.6780750e+03   9.1414950e+03   3.3206000e+02   3.3206000e+02   8.3622800e+02   2.8800000e+02   6.9687700e+02   2.9520000e+00   9.9800000e-01   1.5372000e+01   1.0350000e+00   4.4428000e+01   8.8000000e-01   9.5000000e-01   9.9300000e-01
   8.2060000e+00   2.4000000e+01   5.0996781e+04   3.0876150e+03   9.3250360e+03   4.3798100e+02   4.3798100e+02   9.3368000e+02   2.8800000e+02   7.3888900e+02   3.5600000e+00   9.9800000e-01   1.8250000e+01   1.0410000e+00   6.0713000e+01   1.2020000e+00   9.5000000e-01   9.9300000e-01
   9.3000000e+00   2.7000000e+01   7.2776920e+04   3.5604360e+03   9.7921460e+03   6.4493600e+02   6.4493600e+02   1.0998630e+03   2.8800000e+02   7.8662500e+02   4.4760000e+00   9.9800000e-01   2.2323000e+01   1.0490000e+00   9.0666000e+01   1.7950000e+00   9.5000000e-01   9.9300000e-01
   1.1380000e+00   3.0000000e+00   3.0570600e+02   1.3323960e+03   6.7148400e+03   6.6160000e+00   6.6160000e+00   4.6088200e+02   2.8800000e+02   5.4794100e+02   1.0940000e+00   9.9800000e-01   5.8500000e+00   1.0190000e+00   1.4834000e+01   8.9000000e-02   9.5000000e-01   9.9400000e-01
   2.0880000e+00   6.0000000e+00   5.1791590e+03   1.3458050e+03   6.8581960e+03   2.2643000e+01   2.2643000e+01   5.7998300e+02   2.8800000e+02   5.7167700e+02   1.2690000e+00   9.9800000e-01   6.8240000e+00   1.0190000e+00   2.3230000e+01   2.3500000e-01   9.5000000e-01   9.9400000e-01
   3.1440000e+00   9.0000000e+00   8.3811860e+03   1.3867690e+03   7.1610890e+03   6.0378000e+01   6.0378000e+01   5.9047000e+02   2.8800000e+02   5.8474900e+02   1.3870000e+00   9.9800000e-01   7.4360000e+00   1.0200000e+00   1.2444000e+01   2.4600000e-01   9.5000000e-01   9.9400000e-01
   4.1610000e+00   1.2000000e+01   1.4726047e+04   1.5474770e+03   7.8311370e+03   1.1381200e+02   1.1381200e+02   6.4467200e+02   2.8800000e+02   6.1078800e+02   1.6540000e+00   9.9800000e-01   8.8360000e+00   1.0220000e+00   1.7305000e+01   3.4300000e-01   9.5000000e-01   9.9400000e-01
   5.1400000e+00   1.5000000e+01   2.1639721e+04   1.9243470e+03   8.5121800e+03   1.7531000e+02   1.7531000e+02   7.1291800e+02   2.8800000e+02   6.4219000e+02   2.0730000e+00   9.9800000e-01   1.0981000e+01   1.0260000e+00   2.5311000e+01   5.0100000e-01   9.5000000e-01   9.9400000e-01
   6.1750000e+00   1.8000000e+01   2.9798176e+04   2.3072290e+03   8.8480220e+03   2.4629700e+02   2.4629700e+02   7.7943700e+02   2.8800000e+02   6.7219000e+02   2.4950000e+00   9.9800000e-01   1.3096000e+01   1.0300000e+00   3.4391000e+01   6.8100000e-01   9.5000000e-01   9.9400000e-01
   7.1480000e+00   2.1000000e+01   3.8975179e+04   2.6780750e+03   9.1420000e+03   3.3209400e+02   3.3209400e+02   8.3521900e+02   2.8800000e+02   6.9671100e+02   2.9520000e+00   9.9800000e-01   1.5356000e+01   1.0350000e+00   4.4349000e+01   8.7800000e-01   9.5000000e-01   9.9400000e-01
   8.2060000e+00   2.4000000e+01   5.0996595e+04   3.0876120e+03   9.3253900e+03   4.3808200e+02   4.3808200e+02   9.3268300e+02   2.8800000e+02   7.3873500e+02   3.5590000e+00   9.9800000e-01   1.8230000e+01   1.0410000e+00   6.0619000e+01   1.2000000e+00   9.5000000e-01   9.9400000e-01
   9.3000000e+00   2.7000000e+01   7.2777297e+04   3.5604430e+03   9.7928620e+03   6.4514300e+02   6.4514300e+02   1.0989990e+03   2.8800000e+02   7.8649500e+02   4.4740000e+00   9.9800000e-01   2.2297000e+01   1.0490000e+00   9.0563000e+01   1.7930000e+00   9.5000000e-01   9.9400000e-01
   1.1380000e+00   3.0000000e+00   3.1448000e+02   1.3494660e+03   6.7283530e+03   7.5530000e+00   7.5530000e+00   4.5145000e+02   2.8800000e+02   5.4774200e+02   1.0960000e+00   9.9800000e-01   5.8430000e+00   1.0190000e+00   4.5670000e+00   7.1000000e-02   9.5000000e-01   9.9500000e-01
   2.0880000e+00   6.0000000e+00   5.2280060e+03   1.3459690e+03   6.8608890e+03   2.2671000e+01   2.2671000e+01   5.8050000e+02   2.8800000e+02   5.7171400e+02   1.2700000e+00   9.9800000e-01   6.8250000e+00   1.0190000e+00   2.3174000e+01   2.3600000e-01   9.5000000e-01   9.9500000e-01
   3.1440000e+00   9.0000000e+00   8.3813190e+03   1.3867690e+03   7.1636910e+03   6.0387000e+01   6.0387000e+01   5.8966900e+02   2.8800000e+02   5.8460100e+02   1.3870000e+00   9.9800000e-01   7.4290000e+00   1.0200000e+00   1.2410000e+01   2.4600000e-01   9.5000000e-01   9.9500000e-01
   4.1610000e+00   1.2000000e+01   1.4726150e+04   1.5474780e+03   7.8331820e+03   1.1381700e+02   1.1381700e+02   6.4380900e+02   2.8800000e+02   6.1063000e+02   1.6530000e+00   9.9800000e-01   8.8270000e+00   1.0220000e+00   1.7263000e+01   3.4200000e-01   9.5000000e-01   9.9500000e-01
   5.1400000e+00   1.5000000e+01   2.1639876e+04   1.9243490e+03   8.5130980e+03   1.7532700e+02   1.7532700e+02   7.1196500e+02   2.8800000e+02   6.4201200e+02   2.0730000e+00   9.9800000e-01   1.0970000e+01   1.0260000e+00   2.5256000e+01   5.0000000e-01   9.5000000e-01   9.9500000e-01
   6.1750000e+00   1.8000000e+01   2.9798329e+04   2.3072230e+03   8.8490510e+03   2.4638000e+02   2.4638000e+02   7.7836500e+02   2.8800000e+02   6.7197500e+02   2.4940000e+00   9.9800000e-01   1.3083000e+01   1.0300000e+00   3.4321000e+01   6.8000000e-01   9.5000000e-01   9.9500000e-01
   7.1480000e+00   2.1000000e+01   3.8974892e+04   2.6780750e+03   9.1425050e+03   3.3210500e+02   3.3210500e+02   8.3421300e+02   2.8800000e+02   6.9654600e+02   2.9510000e+00   9.9800000e-01   1.5339000e+01   1.0350000e+00   4.4270000e+01   8.7700000e-01   9.5000000e-01   9.9500000e-01
   8.2060000e+00   2.4000000e+01   5.0995647e+04   3.0875910e+03   9.3257770e+03   4.3807300e+02   4.3807300e+02   9.3166300e+02   2.8800000e+02   7.3858300e+02   3.5580000e+00   9.9800000e-01   1.8209000e+01   1.0410000e+00   6.0524000e+01   1.1980000e+00   9.5000000e-01   9.9500000e-01
   9.3000000e+00   2.7000000e+01   7.2778944e+04   3.5604570e+03   9.7935930e+03   6.4486600e+02   6.4486600e+02   1.0981460e+03   2.8800000e+02   7.8636700e+02   4.4730000e+00   9.9800000e-01   2.2270000e+01   1.0490000e+00   9.0461000e+01   1.7910000e+00   9.5000000e-01   9.9500000e-01
   1.1380000e+00   3.0000000e+00   4.9738500e+02   1.3593620e+03   6.7375830e+03   8.1110000e+00   8.1110000e+00   4.5460700e+02   2.8800000e+02   5.4875100e+02   1.1040000e+00   9.9800000e-01   5.8820000e+00   1.0190000e+00   0.0000000e+00   7.2000000e-02   9.5000000e-01   9.9600000e-01
   2.0880000e+00   6.0000000e+00   4.8263010e+03   1.3447370e+03   6.8626780e+03   2.2448000e+01   2.2448000e+01   5.6903600e+02   2.8800000e+02   5.6988900e+02   1.2580000e+00   9.9800000e-01   6.7450000e+00   1.0190000e+00   2.3176000e+01   2.2200000e-01   9.5000000e-01   9.9600000e-01
   3.1440000e+00   9.0000000e+00   8.3813700e+03   1.3867700e+03   7.1662890e+03   6.0382000e+01   6.0382000e+01   5.8887000e+02   2.8800000e+02   5.8445300e+02   1.3860000e+00   9.9800000e-01   7.4220000e+00   1.0200000e+00   1.2377000e+01   2.4500000e-01   9.5000000e-01   9.9600000e-01
   4.1610000e+00   1.2000000e+01   1.4726291e+04   1.5474780e+03   7.8352320e+03   1.1382100e+02   1.1382100e+02   6.4294900e+02   2.8800000e+02   6.1047200e+02   1.6530000e+00   9.9800000e-01   8.8190000e+00   1.0220000e+00   1.7222000e+01   3.4100000e-01   9.5000000e-01   9.9600000e-01
   5.1400000e+00   1.5000000e+01   2.1640062e+04   1.9243500e+03   8.5140170e+03   1.7531200e+02   1.7531200e+02   7.1101500e+02   2.8800000e+02   6.4183400e+02   2.0720000e+00   9.9800000e-01   1.0959000e+01   1.0260000e+00   2.5202000e+01   4.9900000e-01   9.5000000e-01   9.9600000e-01
   6.1750000e+00   1.8000000e+01   2.9798462e+04   2.3072180e+03   8.8500810e+03   2.4632800e+02   2.4632800e+02   7.7729500e+02   2.8800000e+02   6.7176000e+02   2.4940000e+00   9.9800000e-01   1.3069000e+01   1.0300000e+00   3.4251000e+01   6.7800000e-01   9.5000000e-01   9.9600000e-01
   7.1480000e+00   2.1000000e+01   3.8974631e+04   2.6780750e+03   9.1430100e+03   3.3211000e+02   3.3211000e+02   8.3320900e+02   2.8800000e+02   6.9638100e+02   2.9510000e+00   9.9800000e-01   1.5323000e+01   1.0350000e+00   4.4191000e+01   8.7500000e-01   9.5000000e-01   9.9600000e-01
   8.2060000e+00   2.4000000e+01   5.0995184e+04   3.0875770e+03   9.3261710e+03   4.3811600e+02   4.3811600e+02   9.3064900e+02   2.8800000e+02   7.3843300e+02   3.5580000e+00   9.9800000e-01   1.8189000e+01   1.0410000e+00   6.0429000e+01   1.1960000e+00   9.5000000e-01   9.9600000e-01
   9.3000000e+00   2.7000000e+01   7.2779364e+04   3.5605630e+03   9.7943250e+03   6.4515000e+02   6.4515000e+02   1.0972970e+03   2.8800000e+02   7.8624000e+02   4.4720000e+00   9.9800000e-01   2.2244000e+01   1.0490000e+00   9.0360000e+01   1.7890000e+00   9.5000000e-01   9.9600000e-01
   1.1380000e+00   3.0000000e+00   7.8827500e+02   1.3721250e+03   6.7488500e+03   8.8430000e+00   8.8430000e+00   4.6243400e+02   2.8800000e+02   5.5043800e+02   1.1170000e+00   9.9800000e-01   5.9460000e+00   1.0190000e+00   0.0000000e+00   8.1000000e-02   9.5000000e-01   9.9700000e-01
   2.0880000e+00   6.0000000e+00   4.7990060e+03   1.3448750e+03   6.8653050e+03   2.2463000e+01   2.2463000e+01   5.6738400e+02   2.8800000e+02   5.6974100e+02   1.2570000e+00   9.9800000e-01   6.7390000e+00   1.0190000e+00   2.3074000e+01   2.2100000e-01   9.5000000e-01   9.9700000e-01
   3.1440000e+00   9.0000000e+00   8.3814960e+03   1.3867700e+03   7.1688930e+03   6.0375000e+01   6.0375000e+01   5.8807300e+02   2.8800000e+02   5.8430500e+02   1.3860000e+00   9.9800000e-01   7.4150000e+00   1.0200000e+00   1.2344000e+01   2.4400000e-01   9.5000000e-01   9.9700000e-01
   4.1610000e+00   1.2000000e+01   1.4726301e+04   1.5474790e+03   7.8372730e+03   1.1380700e+02   1.1380700e+02   6.4209100e+02   2.8800000e+02   6.1031400e+02   1.6530000e+00   9.9800000e-01   8.8100000e+00   1.0220000e+00   1.7181000e+01   3.4000000e-01   9.5000000e-01   9.9700000e-01
   5.1400000e+00   1.5000000e+01   2.1640086e+04   1.9243530e+03   8.5149320e+03   1.7533400e+02   1.7533400e+02   7.1006500e+02   2.8800000e+02   6.4165600e+02   2.0720000e+00   9.9800000e-01   1.0948000e+01   1.0260000e+00   2.5147000e+01   4.9800000e-01   9.5000000e-01   9.9700000e-01
   6.1750000e+00   1.8000000e+01   2.9798500e+04   2.3072120e+03   8.8511060e+03   2.4633900e+02   2.4633900e+02   7.7622900e+02   2.8800000e+02   6.7154500e+02   2.4940000e+00   9.9800000e-01   1.3056000e+01   1.0300000e+00   3.4181000e+01   6.7700000e-01   9.5000000e-01   9.9700000e-01
   7.1480000e+00   2.1000000e+01   3.8974378e+04   2.6780740e+03   9.1435140e+03   3.3203800e+02   3.3203800e+02   8.3220900e+02   2.8800000e+02   6.9621600e+02   2.9500000e+00   9.9800000e-01   1.5306000e+01   1.0350000e+00   4.4112000e+01   8.7300000e-01   9.5000000e-01   9.9700000e-01
   8.2060000e+00   2.4000000e+01   5.0994939e+04   3.0875700e+03   9.3265670e+03   4.3806300e+02   4.3806300e+02   9.2963900e+02   2.8800000e+02   7.3828400e+02   3.5570000e+00   9.9800000e-01   1.8168000e+01   1.0410000e+00   6.0335000e+01   1.1940000e+00   9.5000000e-01   9.9700000e-01
   9.3000000e+00   2.7000000e+01   7.2782590e+04   3.5607410e+03   9.7951050e+03   6.4523600e+02   6.4523600e+02   1.0964770e+03   2.8800000e+02   7.8611700e+02   4.4710000e+00   9.9800000e-01   2.2218000e+01   1.0490000e+00   9.0263000e+01   1.7870000e+00   9.5000000e-01   9.9700000e-01
   1.1380000e+00   3.0000000e+00   8.7388300e+02   1.3752430e+03   6.7534940e+03   9.0220000e+00   9.0220000e+00   4.6427000e+02   2.8800000e+02   5.5084100e+02   1.1210000e+00   9.9800000e-01   5.9620000e+00   1.0190000e+00   0.0000000e+00   8.3000000e-02   9.5000000e-01   9.9800000e-01
   2.0880000e+00   6.0000000e+00   4.7687340e+03   1.3448020e+03   6.8678510e+03   2.2448000e+01   2.2448000e+01   5.6591600e+02   2.8800000e+02   5.6946400e+02   1.2560000e+00   9.9800000e-01   6.7270000e+00   1.0190000e+00   2.3050000e+01   2.1900000e-01   9.5000000e-01   9.9800000e-01
   3.1440000e+00   9.0000000e+00   8.3816060e+03   1.3867710e+03   7.1714960e+03   6.0384000e+01   6.0384000e+01   5.8727700e+02   2.8800000e+02   5.8415700e+02   1.3860000e+00   9.9800000e-01   7.4070000e+00   1.0200000e+00   1.2311000e+01   2.4400000e-01   9.5000000e-01   9.9800000e-01
   4.1610000e+00   1.2000000e+01   1.4726397e+04   1.5474800e+03   7.8393220e+03   1.1381700e+02   1.1381700e+02   6.4123400e+02   2.8800000e+02   6.1015700e+02   1.6530000e+00   9.9800000e-01   8.8010000e+00   1.0220000e+00   1.7139000e+01   3.3900000e-01   9.5000000e-01   9.9800000e-01
   5.1400000e+00   1.5000000e+01   2.1640308e+04   1.9243540e+03   8.5158520e+03   1.7533700e+02   1.7533700e+02   7.0912000e+02   2.8800000e+02   6.4147900e+02   2.0720000e+00   9.9800000e-01   1.0937000e+01   1.0260000e+00   2.5093000e+01   4.9700000e-01   9.5000000e-01   9.9800000e-01
   6.1750000e+00   1.8000000e+01   2.9798543e+04   2.3072080e+03   8.8521330e+03   2.4639700e+02   2.4639700e+02   7.7516500e+02   2.8800000e+02   6.7133100e+02   2.4930000e+00   9.9800000e-01   1.3043000e+01   1.0300000e+00   3.4111000e+01   6.7500000e-01   9.5000000e-01   9.9800000e-01
   7.1480000e+00   2.1000000e+01   3.8974113e+04   2.6780740e+03   9.1440180e+03   3.3199400e+02   3.3199400e+02   8.3121100e+02   2.8800000e+02   6.9605200e+02   2.9490000e+00   9.9800000e-01   1.5289000e+01   1.0350000e+00   4.4033000e+01   8.7200000e-01   9.5000000e-01   9.9800000e-01
   8.2060000e+00   2.4000000e+01   5.0994777e+04   3.0875640e+03   9.3269630e+03   4.3805200e+02   4.3805200e+02   9.2863200e+02   2.8800000e+02   7.3813600e+02   3.5560000e+00   9.9800000e-01   1.8148000e+01   1.0410000e+00   6.0241000e+01   1.1930000e+00   9.5000000e-01   9.9800000e-01
   9.3000000e+00   2.7000000e+01   7.2781391e+04   3.5607200e+03   9.7957780e+03   6.4488400e+02   6.4488400e+02   1.0956090e+03   2.8800000e+02   7.8598800e+02   4.4700000e+00   9.9800000e-01   2.2192000e+01   1.0490000e+00   9.0159000e+01   1.7850000e+00   9.5000000e-01   9.9800000e-01
   1.1380000e+00   3.0000000e+00   9.3700600e+02   1.3774280e+03   6.7575650e+03   9.1480000e+00   9.1480000e+00   4.6547000e+02   2.8800000e+02   5.5107600e+02   1.1240000e+00   9.9800000e-01   5.9710000e+00   1.0190000e+00   0.0000000e+00   8.5000000e-02   9.5000000e-01   9.9900000e-01
   2.0880000e+00   6.0000000e+00   4.4362130e+03   1.3446860e+03   6.8702660e+03   2.2420000e+01   2.2420000e+01   5.5621100e+02   2.8800000e+02   5.6797400e+02   1.2450000e+00   9.9800000e-01   6.6620000e+00   1.0190000e+00   2.2745000e+01   2.0700000e-01   9.5000000e-01   9.9900000e-01
   3.1440000e+00   9.0000000e+00   8.3816770e+03   1.3867720e+03   7.1740970e+03   6.0379000e+01   6.0379000e+01   5.8648300e+02   2.8800000e+02   5.8400900e+02   1.3860000e+00   9.9800000e-01   7.4000000e+00   1.0200000e+00   1.2277000e+01   2.4300000e-01   9.5000000e-01   9.9900000e-01
   4.1610000e+00   1.2000000e+01   1.4726556e+04   1.5474800e+03   7.8413790e+03   1.1382400e+02   1.1382400e+02   6.4038100e+02   2.8800000e+02   6.1000000e+02   1.6530000e+00   9.9800000e-01   8.7920000e+00   1.0220000e+00   1.7098000e+01   3.3800000e-01   9.5000000e-01   9.9900000e-01
   5.1400000e+00   1.5000000e+01   2.1640355e+04   1.9243570e+03   8.5167680e+03   1.7533800e+02   1.7533800e+02   7.0817600e+02   2.8800000e+02   6.4130300e+02   2.0720000e+00   9.9800000e-01   1.0926000e+01   1.0260000e+00   2.5038000e+01   4.9600000e-01   9.5000000e-01   9.9900000e-01
   6.1750000e+00   1.8000000e+01   2.9798580e+04   2.3072050e+03   8.8531610e+03   2.4639400e+02   2.4639400e+02   7.7410300e+02   2.8800000e+02   6.7111800e+02   2.4930000e+00   9.9800000e-01   1.3029000e+01   1.0300000e+00   3.4042000e+01   6.7400000e-01   9.5000000e-01   9.9900000e-01
   7.1480000e+00   2.1000000e+01   3.8973845e+04   2.6780750e+03   9.1445220e+03   3.3211700e+02   3.3211700e+02   8.3021500e+02   2.8800000e+02   6.9588800e+02   2.9490000e+00   9.9800000e-01   1.5273000e+01   1.0350000e+00   4.3955000e+01   8.7000000e-01   9.5000000e-01   9.9900000e-01
   8.2060000e+00   2.4000000e+01   5.0994640e+04   3.0875600e+03   9.3273600e+03   4.3810000e+02   4.3810000e+02   9.2762900e+02   2.8800000e+02   7.3798900e+02   3.5550000e+00   9.9800000e-01   1.8128000e+01   1.0410000e+00   6.0147000e+01   1.1910000e+00   9.5000000e-01   9.9900000e-01
   9.3000000e+00   2.7000000e+01   7.2779536e+04   3.5607120e+03   9.7964400e+03   6.4518000e+02   6.4518000e+02   1.0947420e+03   2.8800000e+02   7.8585900e+02   4.4680000e+00   9.9800000e-01   2.2165000e+01   1.0490000e+00   9.0054000e+01   1.7830000e+00   9.5000000e-01   9.9900000e-01
   1.1380000e+00   3.0000000e+00   1.1053620e+03   1.3837770e+03   6.7644260e+03   9.5150000e+00   9.5150000e+00   4.6975200e+02   2.8800000e+02   5.5191500e+02   1.1310000e+00   9.9800000e-01   6.0040000e+00   1.0190000e+00   0.0000000e+00   9.0000000e-02   9.5000000e-01   1.0000000e+00
   2.0880000e+00   6.0000000e+00   4.1785630e+03   1.3449680e+03   6.8729940e+03   2.2462000e+01   2.2462000e+01   5.4809300e+02   2.8800000e+02   5.6670100e+02   1.2370000e+00   9.9800000e-01   6.6080000e+00   1.0190000e+00   2.2353000e+01   1.9700000e-01   9.5000000e-01   1.0000000e+00
   3.1440000e+00   9.0000000e+00   8.3818180e+03   1.3867720e+03   7.1767030e+03   6.0388000e+01   6.0388000e+01   5.8569100e+02   2.8800000e+02   5.8386200e+02   1.3860000e+00   9.9800000e-01   7.3930000e+00   1.0200000e+00   1.2244000e+01   2.4200000e-01   9.5000000e-01   1.0000000e+00
   4.1610000e+00   1.2000000e+01   1.4726603e+04   1.5474810e+03   7.8434270e+03   1.1382400e+02   1.1382400e+02   6.3952800e+02   2.8800000e+02   6.0984300e+02   1.6520000e+00   9.9800000e-01   8.7840000e+00   1.0220000e+00   1.7057000e+01   3.3800000e-01   9.5000000e-01   1.0000000e+00
   5.1400000e+00   1.5000000e+01   2.1640790e+04   1.9243570e+03   8.5176950e+03   1.7534000e+02   1.7534000e+02   7.0723700e+02   2.8800000e+02   6.4112700e+02   2.0710000e+00   9.9800000e-01   1.0915000e+01   1.0260000e+00   2.4984000e+01   4.9500000e-01   9.5000000e-01   1.0000000e+00
   6.1750000e+00   1.8000000e+01   2.9798727e+04   2.3072040e+03   8.8541950e+03   2.4633600e+02   2.4633600e+02   7.7304500e+02   2.8800000e+02   6.7090500e+02   2.4920000e+00   9.9800000e-01   1.3016000e+01   1.0300000e+00   3.3972000e+01   6.7300000e-01   9.5000000e-01   1.0000000e+00
   7.1480000e+00   2.1000000e+01   3.8973613e+04   2.6780740e+03   9.1450260e+03   3.3207100e+02   3.3207100e+02   8.2922200e+02   2.8800000e+02   6.9572500e+02   2.9480000e+00   9.9800000e-01   1.5257000e+01   1.0350000e+00   4.3877000e+01   8.6900000e-01   9.5000000e-01   1.0000000e+00
   8.2060000e+00   2.4000000e+01   5.0994522e+04   3.0875570e+03   9.3277560e+03   4.3795100e+02   4.3795100e+02   9.2662900e+02   2.8800000e+02   7.3784200e+02   3.5540000e+00   9.9800000e-01   1.8108000e+01   1.0410000e+00   6.0053000e+01   1.1890000e+00   9.5000000e-01   1.0000000e+00
   9.3000000e+00   2.7000000e+01   7.2777956e+04   3.5607030e+03   9.7971030e+03   6.4503000e+02   6.4503000e+02   1.0938780e+03   2.8800000e+02   7.8573100e+02   4.4670000e+00   9.9800000e-01   2.2139000e+01   1.0490000e+00   8.9951000e+01   1.7810000e+00   9.5000000e-01   1.0000000e+00
   1.1380000e+00   3.0000000e+00   3.9564800e+02   1.3315630e+03   6.6635870e+03   6.5900000e+00   6.5900000e+00   4.7769700e+02   2.8800000e+02   5.5114900e+02   1.0990000e+00   9.9800000e-01   5.9760000e+00   1.0190000e+00   1.7188000e+01   1.0500000e-01   9.5100000e-01   9.7500000e-01
   2.0880000e+00   6.0000000e+00   6.9563850e+03   1.3750300e+03   6.8254950e+03   2.7996000e+01   2.7996000e+01   6.3518000e+02   2.8800000e+02   5.8139900e+02   1.3310000e+00   9.9800000e-01   7.2810000e+00   1.0190000e+00   1.1308000e+01   2.8700000e-01   9.5100000e-01   9.7500000e-01
   3.1440000e+00   9.0000000e+00   8.3791080e+03   1.3867570e+03   7.1094930e+03   6.0352000e+01   6.0352000e+01   6.0553100e+02   2.8800000e+02   5.8736300e+02   1.3890000e+00   9.9800000e-01   7.5750000e+00   1.0200000e+00   1.3069000e+01   2.5900000e-01   9.5100000e-01   9.7500000e-01
   4.1610000e+00   1.2000000e+01   1.4724427e+04   1.5474640e+03   7.7903150e+03   1.1378100e+02   1.1378100e+02   6.6099800e+02   2.8800000e+02   6.1362800e+02   1.6580000e+00   9.9800000e-01   9.0080000e+00   1.0220000e+00   1.8090000e+01   3.5800000e-01   9.5100000e-01   9.7500000e-01
   5.1400000e+00   1.5000000e+01   2.1636234e+04   1.9243120e+03   8.4938010e+03   1.7529300e+02   1.7529300e+02   7.3094800e+02   2.8800000e+02   6.4538700e+02   2.0790000e+00   9.9800000e-01   1.1198000e+01   1.0260000e+00   2.6349000e+01   5.2200000e-01   9.5100000e-01   9.7500000e-01
   6.1750000e+00   1.8000000e+01   2.9792435e+04   2.3074150e+03   8.8272600e+03   2.4622100e+02   2.4622100e+02   7.9989500e+02   2.8800000e+02   6.7614800e+02   2.5020000e+00   9.9800000e-01   1.3358000e+01   1.0300000e+00   3.5734000e+01   7.0700000e-01   9.5100000e-01   9.7500000e-01
   7.1480000e+00   2.1000000e+01   3.8982867e+04   2.6780860e+03   9.1319220e+03   3.3217600e+02   3.3217600e+02   8.5405800e+02   2.8800000e+02   6.9963300e+02   2.9640000e+00   9.9800000e-01   1.5682000e+01   1.0350000e+00   4.5845000e+01   9.0800000e-01   9.5100000e-01   9.7500000e-01
   8.2060000e+00   2.4000000e+01   5.0996612e+04   3.0875550e+03   9.3179410e+03   4.3813100e+02   4.3813100e+02   9.5144100e+02   2.8800000e+02   7.4144300e+02   3.5770000e+00   9.9800000e-01   1.8636000e+01   1.0410000e+00   6.2400000e+01   1.2350000e+00   9.5100000e-01   9.7500000e-01
   9.3000000e+00   2.7000000e+01   7.2762165e+04   3.5604020e+03   9.7773220e+03   6.4504800e+02   6.4504800e+02   1.1146090e+03   2.8800000e+02   7.8872200e+02   4.4990000e+00   9.9800000e-01   2.2818000e+01   1.0490000e+00   9.2476000e+01   1.8310000e+00   9.5100000e-01   9.7500000e-01
   1.1380000e+00   3.0000000e+00   4.1447000e+02   1.3570920e+03   6.6828570e+03   8.0130000e+00   8.0130000e+00   4.6430400e+02   2.8800000e+02   5.5099500e+02   1.1010000e+00   9.9800000e-01   5.9720000e+00   1.0190000e+00   2.8490000e+00   7.9000000e-02   9.5100000e-01   9.7600000e-01
   2.0880000e+00   6.0000000e+00   6.9134490e+03   1.3672400e+03   6.8231990e+03   2.6553000e+01   2.6553000e+01   6.3534400e+02   2.8800000e+02   5.8091700e+02   1.3270000e+00   9.9800000e-01   7.2570000e+00   1.0190000e+00   1.5178000e+01   2.9000000e-01   9.5100000e-01   9.7600000e-01
   3.1440000e+00   9.0000000e+00   8.3791890e+03   1.3867570e+03   7.1120770e+03   6.0352000e+01   6.0352000e+01   6.0469900e+02   2.8800000e+02   5.8721300e+02   1.3890000e+00   9.9800000e-01   7.5670000e+00   1.0200000e+00   1.3035000e+01   2.5800000e-01   9.5100000e-01   9.7600000e-01
   4.1610000e+00   1.2000000e+01   1.4724443e+04   1.5474650e+03   7.7923180e+03   1.1378600e+02   1.1378600e+02   6.6009400e+02   2.8800000e+02   6.1346400e+02   1.6580000e+00   9.9800000e-01   8.9990000e+00   1.0220000e+00   1.8047000e+01   3.5700000e-01   9.5100000e-01   9.7600000e-01
   5.1400000e+00   1.5000000e+01   2.1636269e+04   1.9243140e+03   8.4947110e+03   1.7529600e+02   1.7529600e+02   7.2994800e+02   2.8800000e+02   6.4520200e+02   2.0780000e+00   9.9800000e-01   1.1187000e+01   1.0260000e+00   2.6292000e+01   5.2000000e-01   9.5100000e-01   9.7600000e-01
   6.1750000e+00   1.8000000e+01   2.9792785e+04   2.3074040e+03   8.8282990e+03   2.4621500e+02   2.4621500e+02   7.9875900e+02   2.8800000e+02   6.7592100e+02   2.5010000e+00   9.9800000e-01   1.3344000e+01   1.0300000e+00   3.5661000e+01   7.0600000e-01   9.5100000e-01   9.7600000e-01
   7.1480000e+00   2.1000000e+01   3.8982430e+04   2.6780850e+03   9.1324230e+03   3.3220800e+02   3.3220800e+02   8.5301200e+02   2.8800000e+02   6.9945700e+02   2.9630000e+00   9.9800000e-01   1.5665000e+01   1.0350000e+00   4.5763000e+01   9.0600000e-01   9.5100000e-01   9.7600000e-01
   8.2060000e+00   2.4000000e+01   5.0997075e+04   3.0875760e+03   9.3183150e+03   4.3799700e+02   4.3799700e+02   9.5039200e+02   2.8800000e+02   7.4127800e+02   3.5760000e+00   9.9800000e-01   1.8614000e+01   1.0410000e+00   6.2303000e+01   1.2330000e+00   9.5100000e-01   9.7600000e-01
   9.3000000e+00   2.7000000e+01   7.2763290e+04   3.5604030e+03   9.7781220e+03   6.4472300e+02   6.4472300e+02   1.1137050e+03   2.8800000e+02   7.8857700e+02   4.4980000e+00   9.9800000e-01   2.2790000e+01   1.0490000e+00   9.2369000e+01   1.8280000e+00   9.5100000e-01   9.7600000e-01
   1.1380000e+00   3.0000000e+00   6.5833600e+02   1.3677430e+03   6.6927560e+03   8.6150000e+00   8.6150000e+00   4.7040500e+02   2.8800000e+02   5.5241100e+02   1.1120000e+00   9.9800000e-01   6.0270000e+00   1.0190000e+00   0.0000000e+00   8.5000000e-02   9.5100000e-01   9.7700000e-01
   2.0880000e+00   6.0000000e+00   6.8398490e+03   1.3639780e+03   6.8237600e+03   2.5963000e+01   2.5963000e+01   6.3342600e+02   2.8800000e+02   5.8044300e+02   1.3240000e+00   9.9800000e-01   7.2350000e+00   1.0190000e+00   1.6914000e+01   2.8900000e-01   9.5100000e-01   9.7700000e-01
   3.1440000e+00   9.0000000e+00   8.3793100e+03   1.3867580e+03   7.1146640e+03   6.0355000e+01   6.0355000e+01   6.0386800e+02   2.8800000e+02   5.8706300e+02   1.3890000e+00   9.9800000e-01   7.5600000e+00   1.0200000e+00   1.3000000e+01   2.5700000e-01   9.5100000e-01   9.7700000e-01
   4.1610000e+00   1.2000000e+01   1.4724495e+04   1.5474660e+03   7.7943250e+03   1.1380000e+02   1.1380000e+02   6.5919200e+02   2.8800000e+02   6.1330000e+02   1.6570000e+00   9.9800000e-01   8.9900000e+00   1.0220000e+00   1.8004000e+01   3.5600000e-01   9.5100000e-01   9.7700000e-01
   5.1400000e+00   1.5000000e+01   2.1636533e+04   1.9243150e+03   8.4956270e+03   1.7528600e+02   1.7528600e+02   7.2895100e+02   2.8800000e+02   6.4501800e+02   2.0780000e+00   9.9800000e-01   1.1175000e+01   1.0260000e+00   2.6235000e+01   5.1900000e-01   9.5100000e-01   9.7700000e-01
   6.1750000e+00   1.8000000e+01   2.9793015e+04   2.3073850e+03   8.8293310e+03   2.4625400e+02   2.4625400e+02   7.9762700e+02   2.8800000e+02   6.7569400e+02   2.5010000e+00   9.9800000e-01   1.3330000e+01   1.0300000e+00   3.5587000e+01   7.0500000e-01   9.5100000e-01   9.7700000e-01
   7.1480000e+00   2.1000000e+01   3.8982016e+04   2.6780860e+03   9.1329240e+03   3.3213900e+02   3.3213900e+02   8.5196900e+02   2.8800000e+02   6.9928200e+02   2.9630000e+00   9.9800000e-01   1.5647000e+01   1.0350000e+00   4.5682000e+01   9.0400000e-01   9.5100000e-01   9.7700000e-01
   8.2060000e+00   2.4000000e+01   5.0997444e+04   3.0875940e+03   9.3186860e+03   4.3808200e+02   4.3808200e+02   9.4934600e+02   2.8800000e+02   7.4111400e+02   3.5750000e+00   9.9800000e-01   1.8593000e+01   1.0410000e+00   6.2206000e+01   1.2310000e+00   9.5100000e-01   9.7700000e-01
   9.3000000e+00   2.7000000e+01   7.2763629e+04   3.5604110e+03   9.7789080e+03   6.4480500e+02   6.4480500e+02   1.1127990e+03   2.8800000e+02   7.8843300e+02   4.4960000e+00   9.9800000e-01   2.2763000e+01   1.0490000e+00   9.2261000e+01   1.8260000e+00   9.5100000e-01   9.7700000e-01
   1.1380000e+00   3.0000000e+00   1.3641520e+03   1.3922620e+03   6.7123430e+03   1.0058000e+01   1.0058000e+01   4.9088600e+02   2.8800000e+02   5.5652100e+02   1.1430000e+00   9.9800000e-01   6.1890000e+00   1.0190000e+00   0.0000000e+00   1.0800000e-01   9.5100000e-01   9.7800000e-01
   2.0880000e+00   6.0000000e+00   6.8122630e+03   1.3635670e+03   6.8260290e+03   2.5886000e+01   2.5886000e+01   6.3186000e+02   2.8800000e+02   5.8017600e+02   1.3230000e+00   9.9800000e-01   7.2220000e+00   1.0190000e+00   1.6830000e+01   2.8800000e-01   9.5100000e-01   9.7800000e-01
   3.1440000e+00   9.0000000e+00   8.3794080e+03   1.3867580e+03   7.1172500e+03   6.0352000e+01   6.0352000e+01   6.0303900e+02   2.8800000e+02   5.8691300e+02   1.3890000e+00   9.9800000e-01   7.5520000e+00   1.0200000e+00   1.2966000e+01   2.5700000e-01   9.5100000e-01   9.7800000e-01
   4.1610000e+00   1.2000000e+01   1.4724507e+04   1.5474660e+03   7.7963310e+03   1.1379000e+02   1.1379000e+02   6.5829300e+02   2.8800000e+02   6.1313700e+02   1.6570000e+00   9.9800000e-01   8.9810000e+00   1.0220000e+00   1.7961000e+01   3.5600000e-01   9.5100000e-01   9.7800000e-01
   5.1400000e+00   1.5000000e+01   2.1636731e+04   1.9243160e+03   8.4965420e+03   1.7531400e+02   1.7531400e+02   7.2795700e+02   2.8800000e+02   6.4483300e+02   2.0780000e+00   9.9800000e-01   1.1164000e+01   1.0260000e+00   2.6179000e+01   5.1800000e-01   9.5100000e-01   9.7800000e-01
   6.1750000e+00   1.8000000e+01   2.9793409e+04   2.3073780e+03   8.8303720e+03   2.4630500e+02   2.4630500e+02   7.9649900e+02   2.8800000e+02   6.7546900e+02   2.5010000e+00   9.9800000e-01   1.3317000e+01   1.0300000e+00   3.5514000e+01   7.0300000e-01   9.5100000e-01   9.7800000e-01
   7.1480000e+00   2.1000000e+01   3.8981591e+04   2.6780880e+03   9.1334240e+03   3.3207100e+02   3.3207100e+02   8.5092900e+02   2.8800000e+02   6.9910700e+02   2.9620000e+00   9.9800000e-01   1.5630000e+01   1.0350000e+00   4.5600000e+01   9.0300000e-01   9.5100000e-01   9.7800000e-01
   8.2060000e+00   2.4000000e+01   5.0997647e+04   3.0876110e+03   9.3190550e+03   4.3803600e+02   4.3803600e+02   9.4830200e+02   2.8800000e+02   7.4095000e+02   3.5740000e+00   9.9800000e-01   1.8571000e+01   1.0410000e+00   6.2108000e+01   1.2300000e+00   9.5100000e-01   9.7800000e-01
   9.3000000e+00   2.7000000e+01   7.2764890e+04   3.5604080e+03   9.7797000e+03   6.4503600e+02   6.4503600e+02   1.1119000e+03   2.8800000e+02   7.8829100e+02   4.4950000e+00   9.9800000e-01   2.2735000e+01   1.0490000e+00   9.2155000e+01   1.8240000e+00   9.5100000e-01   9.7800000e-01
   1.1380000e+00   3.0000000e+00   1.5463920e+03   1.3969090e+03   6.7181450e+03   1.0331000e+01   1.0331000e+01   4.9584600e+02   2.8800000e+02   5.5749100e+02   1.1510000e+00   9.9800000e-01   6.2280000e+00   1.0190000e+00   0.0000000e+00   1.1400000e-01   9.5100000e-01   9.7900000e-01
   2.0880000e+00   6.0000000e+00   6.8043290e+03   1.3631650e+03   6.8283000e+03   2.5813000e+01   2.5813000e+01   6.3088800e+02   2.8800000e+02   5.7999800e+02   1.3230000e+00   9.9800000e-01   7.2140000e+00   1.0190000e+00   1.7081000e+01   2.8700000e-01   9.5100000e-01   9.7900000e-01
   3.1440000e+00   9.0000000e+00   8.3795360e+03   1.3867590e+03   7.1198390e+03   6.0356000e+01   6.0356000e+01   6.0221300e+02   2.8800000e+02   5.8676300e+02   1.3890000e+00   9.9800000e-01   7.5450000e+00   1.0200000e+00   1.2932000e+01   2.5600000e-01   9.5100000e-01   9.7900000e-01
   4.1610000e+00   1.2000000e+01   1.4724667e+04   1.5474670e+03   7.7983510e+03   1.1380000e+02   1.1380000e+02   6.5739600e+02   2.8800000e+02   6.1297400e+02   1.6570000e+00   9.9800000e-01   8.9720000e+00   1.0220000e+00   1.7918000e+01   3.5500000e-01   9.5100000e-01   9.7900000e-01
   5.1400000e+00   1.5000000e+01   2.1636912e+04   1.9243180e+03   8.4974560e+03   1.7528900e+02   1.7528900e+02   7.2696500e+02   2.8800000e+02   6.4465000e+02   2.0780000e+00   9.9800000e-01   1.1152000e+01   1.0260000e+00   2.6122000e+01   5.1700000e-01   9.5100000e-01   9.7900000e-01
   6.1750000e+00   1.8000000e+01   2.9793734e+04   2.3073670e+03   8.8314100e+03   2.4623300e+02   2.4623300e+02   7.9537300e+02   2.8800000e+02   6.7524400e+02   2.5000000e+00   9.9800000e-01   1.3303000e+01   1.0300000e+00   3.5441000e+01   7.0200000e-01   9.5100000e-01   9.7900000e-01
   7.1480000e+00   2.1000000e+01   3.8981209e+04   2.6780890e+03   9.1339250e+03   3.3209400e+02   3.3209400e+02   8.4989200e+02   2.8800000e+02   6.9893300e+02   2.9620000e+00   9.9800000e-01   1.5613000e+01   1.0350000e+00   4.5518000e+01   9.0100000e-01   9.5100000e-01   9.7900000e-01
   8.2060000e+00   2.4000000e+01   5.0997835e+04   3.0876210e+03   9.3194210e+03   4.3813300e+02   4.3813300e+02   9.4726100e+02   2.8800000e+02   7.4078700e+02   3.5730000e+00   9.9800000e-01   1.8550000e+01   1.0410000e+00   6.2011000e+01   1.2280000e+00   9.5100000e-01   9.7900000e-01
   9.3000000e+00   2.7000000e+01   7.2766064e+04   3.5604090e+03   9.7804880e+03   6.4473700e+02   6.4473700e+02   1.1110040e+03   2.8800000e+02   7.8814900e+02   4.4940000e+00   9.9800000e-01   2.2708000e+01   1.0490000e+00   9.2049000e+01   1.8220000e+00   9.5100000e-01   9.7900000e-01
   1.1380000e+00   3.0000000e+00   2.0402630e+03   1.4071540e+03   6.7279480e+03   1.0958000e+01   1.0958000e+01   5.1038100e+02   2.8800000e+02   5.6009300e+02   1.1710000e+00   9.9800000e-01   6.3340000e+00   1.0190000e+00   0.0000000e+00   1.3000000e-01   9.5100000e-01   9.8000000e-01
   2.0880000e+00   6.0000000e+00   6.6838320e+03   1.3603830e+03   6.8291440e+03   2.5300000e+01   2.5300000e+01   6.2757300e+02   2.8800000e+02   5.7938100e+02   1.3180000e+00   9.9800000e-01   7.1850000e+00   1.0190000e+00   1.8426000e+01   2.8400000e-01   9.5100000e-01   9.8000000e-01
   3.1440000e+00   9.0000000e+00   8.3796510e+03   1.3867600e+03   7.1224280e+03   6.0362000e+01   6.0362000e+01   6.0138700e+02   2.8800000e+02   5.8661300e+02   1.3880000e+00   9.9800000e-01   7.5380000e+00   1.0200000e+00   1.2898000e+01   2.5500000e-01   9.5100000e-01   9.8000000e-01
   4.1610000e+00   1.2000000e+01   1.4724717e+04   1.5474680e+03   7.8003640e+03   1.1379700e+02   1.1379700e+02   6.5650100e+02   2.8800000e+02   6.1281100e+02   1.6570000e+00   9.9800000e-01   8.9630000e+00   1.0220000e+00   1.7876000e+01   3.5400000e-01   9.5100000e-01   9.8000000e-01
   5.1400000e+00   1.5000000e+01   2.1637040e+04   1.9243210e+03   8.4983690e+03   1.7529700e+02   1.7529700e+02   7.2597500e+02   2.8800000e+02   6.4446600e+02   2.0770000e+00   9.9800000e-01   1.1141000e+01   1.0260000e+00   2.6066000e+01   5.1600000e-01   9.5100000e-01   9.8000000e-01
   6.1750000e+00   1.8000000e+01   2.9794061e+04   2.3073540e+03   8.8324460e+03   2.4627100e+02   2.4627100e+02   7.9425200e+02   2.8800000e+02   6.7501900e+02   2.5000000e+00   9.9800000e-01   1.3289000e+01   1.0300000e+00   3.5368000e+01   7.0000000e-01   9.5100000e-01   9.8000000e-01
   7.1480000e+00   2.1000000e+01   3.8980834e+04   2.6780880e+03   9.1344250e+03   3.3219800e+02   3.3219800e+02   8.4885800e+02   2.8800000e+02   6.9876000e+02   2.9610000e+00   9.9800000e-01   1.5596000e+01   1.0350000e+00   4.5437000e+01   9.0000000e-01   9.5100000e-01   9.8000000e-01
   8.2060000e+00   2.4000000e+01   5.0997927e+04   3.0876300e+03   9.3197860e+03   4.3799100e+02   4.3799100e+02   9.4622300e+02   2.8800000e+02   7.4062400e+02   3.5730000e+00   9.9800000e-01   1.8529000e+01   1.0410000e+00   6.1914000e+01   1.2260000e+00   9.5100000e-01   9.8000000e-01
   9.3000000e+00   2.7000000e+01   7.2767009e+04   3.5604090e+03   9.7812680e+03   6.4479200e+02   6.4479200e+02   1.1101080e+03   2.8800000e+02   7.8800700e+02   4.4930000e+00   9.9800000e-01   2.2681000e+01   1.0490000e+00   9.1943000e+01   1.8200000e+00   9.5100000e-01   9.8000000e-01
   1.1380000e+00   3.0000000e+00   2.5183190e+03   1.4133700e+03   6.7349880e+03   1.1336000e+01   1.1336000e+01   5.2448300e+02   2.8800000e+02   5.6250600e+02   1.1900000e+00   9.9800000e-01   6.4340000e+00   1.0190000e+00   0.0000000e+00   1.4700000e-01   9.5100000e-01   9.8100000e-01
   2.0880000e+00   6.0000000e+00   6.7006680e+03   1.3607960e+03   6.8319410e+03   2.5381000e+01   2.5381000e+01   6.2701900e+02   2.8800000e+02   5.7927500e+02   1.3190000e+00   9.9800000e-01   7.1800000e+00   1.0190000e+00   1.8085000e+01   2.8400000e-01   9.5100000e-01   9.8100000e-01
   3.1440000e+00   9.0000000e+00   8.3797190e+03   1.3867600e+03   7.1250140e+03   6.0359000e+01   6.0359000e+01   6.0056300e+02   2.8800000e+02   5.8646300e+02   1.3880000e+00   9.9800000e-01   7.5300000e+00   1.0200000e+00   1.2864000e+01   2.5500000e-01   9.5100000e-01   9.8100000e-01
   4.1610000e+00   1.2000000e+01   1.4724791e+04   1.5474680e+03   7.8023810e+03   1.1378100e+02   1.1378100e+02   6.5560900e+02   2.8800000e+02   6.1264900e+02   1.6560000e+00   9.9800000e-01   8.9530000e+00   1.0220000e+00   1.7833000e+01   3.5300000e-01   9.5100000e-01   9.8100000e-01
   5.1400000e+00   1.5000000e+01   2.1637365e+04   1.9243220e+03   8.4992870e+03   1.7530300e+02   1.7530300e+02   7.2498900e+02   2.8800000e+02   6.4428300e+02   2.0770000e+00   9.9800000e-01   1.1129000e+01   1.0260000e+00   2.6009000e+01   5.1500000e-01   9.5100000e-01   9.8100000e-01
   6.1750000e+00   1.8000000e+01   2.9794352e+04   2.3073410e+03   8.8334810e+03   2.4626300e+02   2.4626300e+02   7.9313300e+02   2.8800000e+02   6.7479500e+02   2.5000000e+00   9.9800000e-01   1.3275000e+01   1.0300000e+00   3.5295000e+01   6.9900000e-01   9.5100000e-01   9.8100000e-01
   7.1480000e+00   2.1000000e+01   3.8980444e+04   2.6780900e+03   9.1349250e+03   3.3212800e+02   3.3212800e+02   8.4782600e+02   2.8800000e+02   6.9858700e+02   2.9600000e+00   9.9800000e-01   1.5579000e+01   1.0350000e+00   4.5356000e+01   8.9800000e-01   9.5100000e-01   9.8100000e-01
   8.2060000e+00   2.4000000e+01   5.0998006e+04   3.0876330e+03   9.3201490e+03   4.3800400e+02   4.3800400e+02   9.4518800e+02   2.8800000e+02   7.4046100e+02   3.5720000e+00   9.9800000e-01   1.8507000e+01   1.0410000e+00   6.1818000e+01   1.2240000e+00   9.5100000e-01   9.8100000e-01
   9.3000000e+00   2.7000000e+01   7.2768023e+04   3.5604130e+03   9.7820460e+03   6.4499800e+02   6.4499800e+02   1.1092160e+03   2.8800000e+02   7.8786700e+02   4.4920000e+00   9.9800000e-01   2.2653000e+01   1.0490000e+00   9.1838000e+01   1.8180000e+00   9.5100000e-01   9.8100000e-01
   1.1380000e+00   3.0000000e+00   3.3572350e+03   1.4190640e+03   6.7419400e+03   1.1699000e+01   1.1699000e+01   5.4955400e+02   2.8800000e+02   5.6661000e+02   1.2220000e+00   9.9800000e-01   6.6080000e+00   1.0190000e+00   0.0000000e+00   1.7600000e-01   9.5100000e-01   9.8200000e-01
   2.0880000e+00   6.0000000e+00   6.6143980e+03   1.3590270e+03   6.8334450e+03   2.5050000e+01   2.5050000e+01   6.2433800e+02   2.8800000e+02   5.7879700e+02   1.3160000e+00   9.9800000e-01   7.1570000e+00   1.0190000e+00   1.8896000e+01   2.8200000e-01   9.5100000e-01   9.8200000e-01
   3.1440000e+00   9.0000000e+00   8.3798100e+03   1.3867610e+03   7.1276030e+03   6.0366000e+01   6.0366000e+01   5.9974100e+02   2.8800000e+02   5.8631400e+02   1.3880000e+00   9.9800000e-01   7.5230000e+00   1.0200000e+00   1.2830000e+01   2.5400000e-01   9.5100000e-01   9.8200000e-01
   4.1610000e+00   1.2000000e+01   1.4724842e+04   1.5474690e+03   7.8043970e+03   1.1378600e+02   1.1378600e+02   6.5471800e+02   2.8800000e+02   6.1248700e+02   1.6560000e+00   9.9800000e-01   8.9440000e+00   1.0220000e+00   1.7791000e+01   3.5200000e-01   9.5100000e-01   9.8200000e-01
   5.1400000e+00   1.5000000e+01   2.1637529e+04   1.9243240e+03   8.5002020e+03   1.7530700e+02   1.7530700e+02   7.2400400e+02   2.8800000e+02   6.4410100e+02   2.0770000e+00   9.9800000e-01   1.1118000e+01   1.0260000e+00   2.5953000e+01   5.1400000e-01   9.5100000e-01   9.8200000e-01
   6.1750000e+00   1.8000000e+01   2.9794604e+04   2.3073280e+03   8.8345140e+03   2.4630600e+02   2.4630600e+02   7.9201800e+02   2.8800000e+02   6.7457200e+02   2.4990000e+00   9.9800000e-01   1.3261000e+01   1.0300000e+00   3.5222000e+01   6.9700000e-01   9.5100000e-01   9.8200000e-01
   7.1480000e+00   2.1000000e+01   3.8980093e+04   2.6780900e+03   9.1354240e+03   3.3207100e+02   3.3207100e+02   8.4679800e+02   2.8800000e+02   6.9841400e+02   2.9600000e+00   9.9800000e-01   1.5561000e+01   1.0350000e+00   4.5276000e+01   8.9600000e-01   9.5100000e-01   9.8200000e-01
   8.2060000e+00   2.4000000e+01   5.0997937e+04   3.0876340e+03   9.3205100e+03   4.3813100e+02   4.3813100e+02   9.4415600e+02   2.8800000e+02   7.4029900e+02   3.5710000e+00   9.9800000e-01   1.8486000e+01   1.0410000e+00   6.1721000e+01   1.2220000e+00   9.5100000e-01   9.8200000e-01
   9.3000000e+00   2.7000000e+01   7.2767558e+04   3.5604270e+03   9.7828000e+03   6.4505800e+02   6.4505800e+02   1.1083190e+03   2.8800000e+02   7.8772700e+02   4.4900000e+00   9.9800000e-01   2.2626000e+01   1.0490000e+00   9.1731000e+01   1.8160000e+00   9.5100000e-01   9.8200000e-01
   1.1380000e+00   3.0000000e+00   4.5359680e+03   1.4156710e+03   6.7430350e+03   1.1509000e+01   1.1509000e+01   5.8446300e+02   2.8800000e+02   5.7141900e+02   1.2610000e+00   9.9800000e-01   6.8180000e+00   1.0190000e+00   0.0000000e+00   2.1700000e-01   9.5100000e-01   9.8300000e-01
   2.0880000e+00   6.0000000e+00   6.4256100e+03   1.3561200e+03   6.8341770e+03   2.4517000e+01   2.4517000e+01   6.1928700e+02   2.8800000e+02   5.7792800e+02   1.3100000e+00   9.9800000e-01   7.1170000e+00   1.0190000e+00   2.0189000e+01   2.7600000e-01   9.5100000e-01   9.8300000e-01
   3.1440000e+00   9.0000000e+00   8.3799600e+03   1.3867610e+03   7.1301960e+03   6.0356000e+01   6.0356000e+01   5.9892200e+02   2.8800000e+02   5.8616400e+02   1.3880000e+00   9.9800000e-01   7.5160000e+00   1.0200000e+00   1.2796000e+01   2.5300000e-01   9.5100000e-01   9.8300000e-01
   4.1610000e+00   1.2000000e+01   1.4724926e+04   1.5474690e+03   7.8064180e+03   1.1379000e+02   1.1379000e+02   6.5383000e+02   2.8800000e+02   6.1232500e+02   1.6560000e+00   9.9800000e-01   8.9350000e+00   1.0220000e+00   1.7748000e+01   3.5100000e-01   9.5100000e-01   9.8300000e-01
   5.1400000e+00   1.5000000e+01   2.1637699e+04   1.9243260e+03   8.5011160e+03   1.7529400e+02   1.7529400e+02   7.2302200e+02   2.8800000e+02   6.4391800e+02   2.0760000e+00   9.9800000e-01   1.1106000e+01   1.0260000e+00   2.5897000e+01   5.1300000e-01   9.5100000e-01   9.8300000e-01
   6.1750000e+00   1.8000000e+01   2.9795017e+04   2.3073220e+03   8.8355550e+03   2.4632500e+02   2.4632500e+02   7.9090700e+02   2.8800000e+02   6.7435000e+02   2.4990000e+00   9.9800000e-01   1.3248000e+01   1.0300000e+00   3.5150000e+01   6.9600000e-01   9.5100000e-01   9.8300000e-01
   7.1480000e+00   2.1000000e+01   3.8979684e+04   2.6780910e+03   9.1359230e+03   3.3210800e+02   3.3210800e+02   8.4577100e+02   2.8800000e+02   6.9824200e+02   2.9590000e+00   9.9800000e-01   1.5544000e+01   1.0350000e+00   4.5195000e+01   8.9500000e-01   9.5100000e-01   9.8300000e-01
   8.2060000e+00   2.4000000e+01   5.0997862e+04   3.0876310e+03   9.3208680e+03   4.3803800e+02   4.3803800e+02   9.4312600e+02   2.8800000e+02   7.4013800e+02   3.5700000e+00   9.9800000e-01   1.8465000e+01   1.0410000e+00   6.1625000e+01   1.2200000e+00   9.5100000e-01   9.8300000e-01
   9.3000000e+00   2.7000000e+01   7.2769398e+04   3.5604190e+03   9.7835790e+03   6.4479000e+02   6.4479000e+02   1.1074360e+03   2.8800000e+02   7.8758900e+02   4.4890000e+00   9.9800000e-01   2.2599000e+01   1.0490000e+00   9.1627000e+01   1.8140000e+00   9.5100000e-01   9.8300000e-01
   1.1380000e+00   3.0000000e+00   4.8771700e+03   1.4133430e+03   6.7442170e+03   1.1369000e+01   1.1369000e+01   5.9346500e+02   2.8800000e+02   5.7277500e+02   1.2710000e+00   9.9800000e-01   6.8780000e+00   1.0190000e+00   0.0000000e+00   2.2900000e-01   9.5100000e-01   9.8400000e-01
   2.0880000e+00   6.0000000e+00   6.3490260e+03   1.3548530e+03   6.8359340e+03   2.4297000e+01   2.4297000e+01   6.1671000e+02   2.8800000e+02   5.7744900e+02   1.3070000e+00   9.9800000e-01   7.0950000e+00   1.0190000e+00   2.0555000e+01   2.7400000e-01   9.5100000e-01   9.8400000e-01
   3.1440000e+00   9.0000000e+00   8.3800490e+03   1.3867620e+03   7.1327860e+03   6.0363000e+01   6.0363000e+01   5.9810300e+02   2.8800000e+02   5.8601500e+02   1.3880000e+00   9.9800000e-01   7.5080000e+00   1.0200000e+00   1.2762000e+01   2.5300000e-01   9.5100000e-01   9.8400000e-01
   4.1610000e+00   1.2000000e+01   1.4725042e+04   1.5474700e+03   7.8084430e+03   1.1379000e+02   1.1379000e+02   6.5294500e+02   2.8800000e+02   6.1216400e+02   1.6560000e+00   9.9800000e-01   8.9260000e+00   1.0220000e+00   1.7706000e+01   3.5000000e-01   9.5100000e-01   9.8400000e-01
   5.1400000e+00   1.5000000e+01   2.1637674e+04   1.9243280e+03   8.5020260e+03   1.7532500e+02   1.7532500e+02   7.2204100e+02   2.8800000e+02   6.4373600e+02   2.0760000e+00   9.9800000e-01   1.1095000e+01   1.0260000e+00   2.5841000e+01   5.1200000e-01   9.5100000e-01   9.8400000e-01
   6.1750000e+00   1.8000000e+01   2.9795179e+04   2.3073040e+03   8.8365810e+03   2.4628200e+02   2.4628200e+02   7.8979900e+02   2.8800000e+02   6.7412700e+02   2.4990000e+00   9.9800000e-01   1.3234000e+01   1.0300000e+00   3.5077000e+01   6.9400000e-01   9.5100000e-01   9.8400000e-01
   7.1480000e+00   2.1000000e+01   3.8979092e+04   2.6780830e+03   9.1364320e+03   3.3204400e+02   3.3204400e+02   8.4473600e+02   2.8800000e+02   6.9807100e+02   2.9590000e+00   9.9800000e-01   1.5527000e+01   1.0350000e+00   4.5114000e+01   8.9300000e-01   9.5100000e-01   9.8400000e-01
   8.2060000e+00   2.4000000e+01   5.0997726e+04   3.0876300e+03   9.3212270e+03   4.3812200e+02   4.3812200e+02   9.4209900e+02   2.8800000e+02   7.3997700e+02   3.5690000e+00   9.9800000e-01   1.8443000e+01   1.0410000e+00   6.1528000e+01   1.2180000e+00   9.5100000e-01   9.8400000e-01
   9.3000000e+00   2.7000000e+01   7.2770122e+04   3.5604200e+03   9.7843400e+03   6.4506700e+02   6.4506700e+02   1.1065490e+03   2.8800000e+02   7.8745100e+02   4.4880000e+00   9.9800000e-01   2.2572000e+01   1.0490000e+00   9.1521000e+01   1.8120000e+00   9.5100000e-01   9.8400000e-01
   1.1380000e+00   3.0000000e+00   5.5499540e+03   1.4068420e+03   6.7429980e+03   1.0980000e+01   1.0980000e+01   6.1201100e+02   2.8800000e+02   5.7524400e+02   1.2910000e+00   9.9800000e-01   6.9900000e+00   1.0190000e+00   0.0000000e+00   2.5100000e-01   9.5100000e-01   9.8500000e-01
   2.0880000e+00   6.0000000e+00   6.2308100e+03   1.3531940e+03   6.8374950e+03   2.3992000e+01   2.3992000e+01   6.1315000e+02   2.8800000e+02   5.7684400e+02   1.3030000e+00   9.9800000e-01   7.0670000e+00   1.0190000e+00   2.1191000e+01   2.7100000e-01   9.5100000e-01   9.8500000e-01
   3.1440000e+00   9.0000000e+00   8.3801170e+03   1.3867630e+03   7.1353750e+03   6.0362000e+01   6.0362000e+01   5.9728600e+02   2.8800000e+02   5.8586600e+02   1.3880000e+00   9.9800000e-01   7.5010000e+00   1.0200000e+00   1.2729000e+01   2.5200000e-01   9.5100000e-01   9.8500000e-01
   4.1610000e+00   1.2000000e+01   1.4725118e+04   1.5474710e+03   7.8104670e+03   1.1379100e+02   1.1379100e+02   6.5206100e+02   2.8800000e+02   6.1200200e+02   1.6560000e+00   9.9800000e-01   8.9170000e+00   1.0220000e+00   1.7663000e+01   3.5000000e-01   9.5100000e-01   9.8500000e-01
   5.1400000e+00   1.5000000e+01   2.1637858e+04   1.9243300e+03   8.5029410e+03   1.7531900e+02   1.7531900e+02   7.2106400e+02   2.8800000e+02   6.4355400e+02   2.0760000e+00   9.9800000e-01   1.1084000e+01   1.0260000e+00   2.5785000e+01   5.1000000e-01   9.5100000e-01   9.8500000e-01
   6.1750000e+00   1.8000000e+01   2.9795487e+04   2.3072960e+03   8.8376170e+03   2.4626900e+02   2.4626900e+02   7.8869500e+02   2.8800000e+02   6.7390600e+02   2.4980000e+00   9.9800000e-01   1.3220000e+01   1.0300000e+00   3.5005000e+01   6.9300000e-01   9.5100000e-01   9.8500000e-01
   7.1480000e+00   2.1000000e+01   3.8978678e+04   2.6780790e+03   9.1369410e+03   3.3213200e+02   3.3213200e+02   8.4370300e+02   2.8800000e+02   6.9790100e+02   2.9580000e+00   9.9800000e-01   1.5510000e+01   1.0350000e+00   4.5033000e+01   8.9200000e-01   9.5100000e-01   9.8500000e-01
   8.2060000e+00   2.4000000e+01   5.0997624e+04   3.0876270e+03   9.3215840e+03   4.3802500e+02   4.3802500e+02   9.4107500e+02   2.8800000e+02   7.3981700e+02   3.5680000e+00   9.9800000e-01   1.8422000e+01   1.0410000e+00   6.1433000e+01   1.2160000e+00   9.5100000e-01   9.8500000e-01
   9.3000000e+00   2.7000000e+01   7.2770670e+04   3.5604260e+03   9.7850950e+03   6.4506400e+02   6.4506400e+02   1.1056650e+03   2.8800000e+02   7.8731300e+02   4.4870000e+00   9.9800000e-01   2.2544000e+01   1.0490000e+00   9.1416000e+01   1.8100000e+00   9.5100000e-01   9.8500000e-01
   1.1380000e+00   3.0000000e+00   6.8517230e+03   1.3877590e+03   6.7341690e+03   9.8430000e+00   9.8430000e+00   6.4915200e+02   2.8800000e+02   5.7939700e+02   1.3250000e+00   9.9800000e-01   7.1830000e+00   1.0190000e+00   0.0000000e+00   2.9700000e-01   9.5100000e-01   9.8600000e-01
   2.0880000e+00   6.0000000e+00   6.0493230e+03   1.3513000e+03   6.8388920e+03   2.3644000e+01   2.3644000e+01   6.0799600e+02   2.8800000e+02   5.7599200e+02   1.2970000e+00   9.9800000e-01   7.0280000e+00   1.0190000e+00   2.1871000e+01   2.6500000e-01   9.5100000e-01   9.8600000e-01
   3.1440000e+00   9.0000000e+00   8.3802710e+03   1.3867630e+03   7.1379710e+03   6.0372000e+01   6.0372000e+01   5.9647100e+02   2.8800000e+02   5.8571700e+02   1.3880000e+00   9.9800000e-01   7.4940000e+00   1.0200000e+00   1.2695000e+01   2.5100000e-01   9.5100000e-01   9.8600000e-01
   4.1610000e+00   1.2000000e+01   1.4725179e+04   1.5474720e+03   7.8124920e+03   1.1379600e+02   1.1379600e+02   6.5117900e+02   2.8800000e+02   6.1184100e+02   1.6550000e+00   9.9800000e-01   8.9080000e+00   1.0220000e+00   1.7621000e+01   3.4900000e-01   9.5100000e-01   9.8600000e-01
   5.1400000e+00   1.5000000e+01   2.1638167e+04   1.9243310e+03   8.5038600e+03   1.7529600e+02   1.7529600e+02   7.2009100e+02   2.8800000e+02   6.4337300e+02   2.0760000e+00   9.9800000e-01   1.1072000e+01   1.0260000e+00   2.5729000e+01   5.0900000e-01   9.5100000e-01   9.8600000e-01
   6.1750000e+00   1.8000000e+01   2.9795892e+04   2.3072910e+03   8.8386570e+03   2.4629800e+02   2.4629800e+02   7.8759300e+02   2.8800000e+02   6.7368500e+02   2.4980000e+00   9.9800000e-01   1.3207000e+01   1.0300000e+00   3.4933000e+01   6.9200000e-01   9.5100000e-01   9.8600000e-01
   7.1480000e+00   2.1000000e+01   3.8978202e+04   2.6780800e+03   9.1374480e+03   3.3203700e+02   3.3203700e+02   8.4267200e+02   2.8800000e+02   6.9773100e+02   2.9570000e+00   9.9800000e-01   1.5493000e+01   1.0350000e+00   4.4952000e+01   8.9000000e-01   9.5100000e-01   9.8600000e-01
   8.2060000e+00   2.4000000e+01   5.0997520e+04   3.0876250e+03   9.3219410e+03   4.3813900e+02   4.3813900e+02   9.4005500e+02   2.8800000e+02   7.3965700e+02   3.5670000e+00   9.9800000e-01   1.8401000e+01   1.0410000e+00   6.1337000e+01   1.2140000e+00   9.5100000e-01   9.8600000e-01
   9.3000000e+00   2.7000000e+01   7.2772093e+04   3.5604230e+03   9.7858570e+03   6.4476800e+02   6.4476800e+02   1.1047870e+03   2.8800000e+02   7.8717700e+02   4.4850000e+00   9.9800000e-01   2.2518000e+01   1.0490000e+00   9.1312000e+01   1.8080000e+00   9.5100000e-01   9.8600000e-01
   1.1380000e+00   3.0000000e+00   7.4507000e+03   1.3629530e+03   6.7214160e+03   8.3980000e+00   8.3980000e+00   6.7154600e+02   2.8800000e+02   5.8070400e+02   1.3340000e+00   9.9800000e-01   7.2450000e+00   1.0190000e+00   1.1593000e+01   3.3300000e-01   9.5100000e-01   9.8700000e-01
   2.0880000e+00   6.0000000e+00   5.9781520e+03   1.3506650e+03   6.8410090e+03   2.3528000e+01   2.3528000e+01   6.0542400e+02   2.8800000e+02   5.7555900e+02   1.2950000e+00   9.9800000e-01   7.0080000e+00   1.0190000e+00   2.2010000e+01   2.6300000e-01   9.5100000e-01   9.8700000e-01
   3.1440000e+00   9.0000000e+00   8.3803530e+03   1.3867640e+03   7.1405620e+03   6.0362000e+01   6.0362000e+01   5.9565800e+02   2.8800000e+02   5.8556800e+02   1.3880000e+00   9.9800000e-01   7.4870000e+00   1.0200000e+00   1.2661000e+01   2.5100000e-01   9.5100000e-01   9.8700000e-01
   4.1610000e+00   1.2000000e+01   1.4725284e+04   1.5474720e+03   7.8145210e+03   1.1380700e+02   1.1380700e+02   6.5030000e+02   2.8800000e+02   6.1168100e+02   1.6550000e+00   9.9800000e-01   8.8990000e+00   1.0220000e+00   1.7579000e+01   3.4800000e-01   9.5100000e-01   9.8700000e-01
   5.1400000e+00   1.5000000e+01   2.1638124e+04   1.9243340e+03   8.5047700e+03   1.7529500e+02   1.7529500e+02   7.1911700e+02   2.8800000e+02   6.4319200e+02   2.0750000e+00   9.9800000e-01   1.1061000e+01   1.0260000e+00   2.5674000e+01   5.0800000e-01   9.5100000e-01   9.8700000e-01
   6.1750000e+00   1.8000000e+01   2.9796181e+04   2.3072820e+03   8.8396910e+03   2.4634300e+02   2.4634300e+02   7.8649600e+02   2.8800000e+02   6.7346500e+02   2.4980000e+00   9.9800000e-01   1.3193000e+01   1.0300000e+00   3.4861000e+01   6.9000000e-01   9.5100000e-01   9.8700000e-01
   7.1480000e+00   2.1000000e+01   3.8977870e+04   2.6780790e+03   9.1379550e+03   3.3212700e+02   3.3212700e+02   8.4164400e+02   2.8800000e+02   6.9756200e+02   2.9570000e+00   9.9800000e-01   1.5476000e+01   1.0350000e+00   4.4871000e+01   8.8800000e-01   9.5100000e-01   9.8700000e-01
   8.2060000e+00   2.4000000e+01   5.0997407e+04   3.0876230e+03   9.3222980e+03   4.3802600e+02   4.3802600e+02   9.3903700e+02   2.8800000e+02   7.3949800e+02   3.5660000e+00   9.9800000e-01   1.8380000e+01   1.0410000e+00   6.1241000e+01   1.2120000e+00   9.5100000e-01   9.8700000e-01
   9.3000000e+00   2.7000000e+01   7.2772935e+04   3.5604240e+03   9.7866070e+03   6.4505700e+02   6.4505700e+02   1.1039080e+03   2.8800000e+02   7.8704200e+02   4.4840000e+00   9.9800000e-01   2.2491000e+01   1.0490000e+00   9.1208000e+01   1.8060000e+00   9.5100000e-01   9.8700000e-01
   1.1380000e+00   3.0000000e+00   7.1078200e+03   1.3412760e+03   6.7100950e+03   7.1720000e+00   7.1720000e+00   6.6712400e+02   2.8800000e+02   5.7894500e+02   1.3190000e+00   9.9800000e-01   7.1610000e+00   1.0190000e+00   2.2211000e+01   3.3300000e-01   9.5100000e-01   9.8800000e-01
   2.0880000e+00   6.0000000e+00   5.6447730e+03   1.3479100e+03   6.8418660e+03   2.3022000e+01   2.3022000e+01   5.9641700e+02   2.8800000e+02   5.7409300e+02   1.2840000e+00   9.9800000e-01   6.9410000e+00   1.0190000e+00   2.2742000e+01   2.5300000e-01   9.5100000e-01   9.8800000e-01
   3.1440000e+00   9.0000000e+00   8.3804710e+03   1.3867640e+03   7.1431570e+03   6.0369000e+01   6.0369000e+01   5.9484600e+02   2.8800000e+02   5.8541900e+02   1.3870000e+00   9.9800000e-01   7.4790000e+00   1.0200000e+00   1.2628000e+01   2.5000000e-01   9.5100000e-01   9.8800000e-01
   4.1610000e+00   1.2000000e+01   1.4725411e+04   1.5474730e+03   7.8165550e+03   1.1380400e+02   1.1380400e+02   6.4942300e+02   2.8800000e+02   6.1152100e+02   1.6550000e+00   9.9800000e-01   8.8900000e+00   1.0220000e+00   1.7537000e+01   3.4700000e-01   9.5100000e-01   9.8800000e-01
   5.1400000e+00   1.5000000e+01   2.1638461e+04   1.9243350e+03   8.5056910e+03   1.7532000e+02   1.7532000e+02   7.1814900e+02   2.8800000e+02   6.4301200e+02   2.0750000e+00   9.9800000e-01   1.1050000e+01   1.0260000e+00   2.5618000e+01   5.0700000e-01   9.5100000e-01   9.8800000e-01
   6.1750000e+00   1.8000000e+01   2.9796476e+04   2.3072740e+03   8.8407250e+03   2.4635100e+02   2.4635100e+02   7.8540100e+02   2.8800000e+02   6.7324600e+02   2.4970000e+00   9.9800000e-01   1.3179000e+01   1.0300000e+00   3.4790000e+01   6.8900000e-01   9.5100000e-01   9.8800000e-01
   7.1480000e+00   2.1000000e+01   3.8977552e+04   2.6780760e+03   9.1384620e+03   3.3210900e+02   3.3210900e+02   8.4061900e+02   2.8800000e+02   6.9739300e+02   2.9560000e+00   9.9800000e-01   1.5460000e+01   1.0350000e+00   4.4791000e+01   8.8700000e-01   9.5100000e-01   9.8800000e-01
   8.2060000e+00   2.4000000e+01   5.0997290e+04   3.0876210e+03   9.3226540e+03   4.3811300e+02   4.3811300e+02   9.3802200e+02   2.8800000e+02   7.3933900e+02   3.5650000e+00   9.9800000e-01   1.8359000e+01   1.0410000e+00   6.1146000e+01   1.2110000e+00   9.5100000e-01   9.8800000e-01
   9.3000000e+00   2.7000000e+01   7.2773322e+04   3.5604290e+03   9.7873480e+03   6.4489700e+02   6.4489700e+02   1.1030300e+03   2.8800000e+02   7.8690700e+02   4.4830000e+00   9.9800000e-01   2.2464000e+01   1.0490000e+00   9.1104000e+01   1.8030000e+00   9.5100000e-01   9.8800000e-01
   1.1380000e+00   3.0000000e+00   6.3255870e+03   1.3262760e+03   6.7026320e+03   6.3340000e+00   6.3340000e+00   6.4920300e+02   2.8800000e+02   5.7572800e+02   1.2930000e+00   9.9800000e-01   7.0110000e+00   1.0190000e+00   2.8278000e+01   3.1600000e-01   9.5100000e-01   9.8900000e-01
   2.0880000e+00   6.0000000e+00   5.6599000e+03   1.3481660e+03   6.8445810e+03   2.3075000e+01   2.3075000e+01   5.9595700e+02   2.8800000e+02   5.7403200e+02   1.2840000e+00   9.9800000e-01   6.9380000e+00   1.0190000e+00   2.2700000e+01   2.5200000e-01   9.5100000e-01   9.8900000e-01
   3.1440000e+00   9.0000000e+00   8.3805940e+03   1.3867650e+03   7.1457530e+03   6.0377000e+01   6.0377000e+01   5.9403700e+02   2.8800000e+02   5.8527000e+02   1.3870000e+00   9.9800000e-01   7.4720000e+00   1.0200000e+00   1.2594000e+01   2.4900000e-01   9.5100000e-01   9.8900000e-01
   4.1610000e+00   1.2000000e+01   1.4725508e+04   1.5474730e+03   7.8185870e+03   1.1380900e+02   1.1380900e+02   6.4854900e+02   2.8800000e+02   6.1136100e+02   1.6550000e+00   9.9800000e-01   8.8810000e+00   1.0220000e+00   1.7495000e+01   3.4600000e-01   9.5100000e-01   9.8900000e-01
   5.1400000e+00   1.5000000e+01   2.1638669e+04   1.9243370e+03   8.5066080e+03   1.7533300e+02   1.7533300e+02   7.1718200e+02   2.8800000e+02   6.4283200e+02   2.0750000e+00   9.9800000e-01   1.1038000e+01   1.0260000e+00   2.5563000e+01   5.0600000e-01   9.5100000e-01   9.8900000e-01
   6.1750000e+00   1.8000000e+01   2.9796735e+04   2.3072650e+03   8.8417560e+03   2.4627300e+02   2.4627300e+02   7.8431000e+02   2.8800000e+02   6.7302700e+02   2.4970000e+00   9.9800000e-01   1.3166000e+01   1.0300000e+00   3.4718000e+01   6.8700000e-01   9.5100000e-01   9.8900000e-01
   7.1480000e+00   2.1000000e+01   3.8977226e+04   2.6780750e+03   9.1389690e+03   3.3214700e+02   3.3214700e+02   8.3959700e+02   2.8800000e+02   6.9722500e+02   2.9560000e+00   9.9800000e-01   1.5443000e+01   1.0350000e+00   4.4711000e+01   8.8500000e-01   9.5100000e-01   9.8900000e-01
   8.2060000e+00   2.4000000e+01   5.0997204e+04   3.0876180e+03   9.3230090e+03   4.3805300e+02   4.3805300e+02   9.3701100e+02   2.8800000e+02   7.3918200e+02   3.5640000e+00   9.9800000e-01   1.8338000e+01   1.0410000e+00   6.1051000e+01   1.2090000e+00   9.5100000e-01   9.8900000e-01
   9.3000000e+00   2.7000000e+01   7.2774147e+04   3.5604300e+03   9.7880900e+03   6.4513500e+02   6.4513500e+02   1.1021560e+03   2.8800000e+02   7.8677300e+02   4.4820000e+00   9.9800000e-01   2.2437000e+01   1.0490000e+00   9.1000000e+01   1.8010000e+00   9.5100000e-01   9.8900000e-01
   1.1380000e+00   3.0000000e+00   4.8335500e+03   1.3126480e+03   6.6953630e+03   5.5830000e+00   5.5830000e+00   6.1226100e+02   2.8800000e+02   5.6992900e+02   1.2470000e+00   9.9800000e-01   6.7500000e+00   1.0190000e+00   3.2888000e+01   2.7500000e-01   9.5100000e-01   9.9000000e-01
   2.0880000e+00   6.0000000e+00   5.4350120e+03   1.3469490e+03   6.8463850e+03   2.2855000e+01   2.2855000e+01   5.8950900e+02   2.8800000e+02   5.7306500e+02   1.2770000e+00   9.9800000e-01   6.8950000e+00   1.0190000e+00   2.3170000e+01   2.4500000e-01   9.5100000e-01   9.9000000e-01
   3.1440000e+00   9.0000000e+00   8.3806510e+03   1.3867660e+03   7.1483450e+03   6.0378000e+01   6.0378000e+01   5.9322800e+02   2.8800000e+02   5.8512100e+02   1.3870000e+00   9.9800000e-01   7.4650000e+00   1.0200000e+00   1.2560000e+01   2.4900000e-01   9.5100000e-01   9.9000000e-01
   4.1610000e+00   1.2000000e+01   1.4725498e+04   1.5474740e+03   7.8206120e+03   1.1380900e+02   1.1380900e+02   6.4767500e+02   2.8800000e+02   6.1120100e+02   1.6550000e+00   9.9800000e-01   8.8730000e+00   1.0220000e+00   1.7453000e+01   3.4500000e-01   9.5100000e-01   9.9000000e-01
   5.1400000e+00   1.5000000e+01   2.1638493e+04   1.9243400e+03   8.5075150e+03   1.7530000e+02   1.7530000e+02   7.1621500e+02   2.8800000e+02   6.4265100e+02   2.0740000e+00   9.9800000e-01   1.1027000e+01   1.0260000e+00   2.5507000e+01   5.0500000e-01   9.5100000e-01   9.9000000e-01
   6.1750000e+00   1.8000000e+01   2.9797016e+04   2.3072580e+03   8.8427900e+03   2.4627600e+02   2.4627600e+02   7.8322200e+02   2.8800000e+02   6.7280800e+02   2.4960000e+00   9.9800000e-01   1.3152000e+01   1.0300000e+00   3.4647000e+01   6.8600000e-01   9.5100000e-01   9.9000000e-01
   7.1480000e+00   2.1000000e+01   3.8976879e+04   2.6780750e+03   9.1394750e+03   3.3215500e+02   3.3215500e+02   8.3857800e+02   2.8800000e+02   6.9705700e+02   2.9550000e+00   9.9800000e-01   1.5426000e+01   1.0350000e+00   4.4631000e+01   8.8400000e-01   9.5100000e-01   9.9000000e-01
   8.2060000e+00   2.4000000e+01   5.0997018e+04   3.0876190e+03   9.3233640e+03   4.3802000e+02   4.3802000e+02   9.3600200e+02   2.8800000e+02   7.3902400e+02   3.5640000e+00   9.9800000e-01   1.8317000e+01   1.0410000e+00   6.0956000e+01   1.2070000e+00   9.5100000e-01   9.9000000e-01
   9.3000000e+00   2.7000000e+01   7.2775064e+04   3.5604270e+03   9.7888290e+03   6.4487600e+02   6.4487600e+02   1.1012850e+03   2.8800000e+02   7.8663900e+02   4.4810000e+00   9.9800000e-01   2.2410000e+01   1.0490000e+00   9.0896000e+01   1.7990000e+00   9.5100000e-01   9.9000000e-01
   1.1380000e+00   3.0000000e+00   3.7315250e+03   1.3082260e+03   6.6939990e+03   5.3410000e+00   5.3410000e+00   5.8219100e+02   2.8800000e+02   5.6543800e+02   1.2120000e+00   9.9800000e-01   6.5560000e+00   1.0190000e+00   3.3556000e+01   2.4100000e-01   9.5100000e-01   9.9100000e-01
   2.0880000e+00   6.0000000e+00   5.2461850e+03   1.3460300e+03   6.8483580e+03   2.2676000e+01   2.2676000e+01   5.8369100e+02   2.8800000e+02   5.7205600e+02   1.2710000e+00   9.9800000e-01   6.8500000e+00   1.0190000e+00   2.2919000e+01   2.3900000e-01   9.5100000e-01   9.9100000e-01
   3.1440000e+00   9.0000000e+00   8.3807540e+03   1.3867660e+03   7.1509410e+03   6.0372000e+01   6.0372000e+01   5.9242100e+02   2.8800000e+02   5.8497300e+02   1.3870000e+00   9.9800000e-01   7.4580000e+00   1.0200000e+00   1.2527000e+01   2.4800000e-01   9.5100000e-01   9.9100000e-01
   4.1610000e+00   1.2000000e+01   1.4725566e+04   1.5474750e+03   7.8226460e+03   1.1381300e+02   1.1381300e+02   6.4680400e+02   2.8800000e+02   6.1104200e+02   1.6540000e+00   9.9800000e-01   8.8640000e+00   1.0220000e+00   1.7411000e+01   3.4500000e-01   9.5100000e-01   9.9100000e-01
   5.1400000e+00   1.5000000e+01   2.1638984e+04   1.9243400e+03   8.5084400e+03   1.7535000e+02   1.7535000e+02   7.1525500e+02   2.8800000e+02   6.4247200e+02   2.0740000e+00   9.9800000e-01   1.1016000e+01   1.0260000e+00   2.5452000e+01   5.0400000e-01   9.5100000e-01   9.9100000e-01
   6.1750000e+00   1.8000000e+01   2.9797220e+04   2.3072490e+03   8.8438180e+03   2.4633300e+02   2.4633300e+02   7.8213800e+02   2.8800000e+02   6.7259100e+02   2.4960000e+00   9.9800000e-01   1.3139000e+01   1.0300000e+00   3.4576000e+01   6.8500000e-01   9.5100000e-01   9.9100000e-01
   7.1480000e+00   2.1000000e+01   3.8976641e+04   2.6780740e+03   9.1399820e+03   3.3211000e+02   3.3211000e+02   8.3756200e+02   2.8800000e+02   6.9689000e+02   2.9540000e+00   9.9800000e-01   1.5409000e+01   1.0350000e+00   4.4551000e+01   8.8200000e-01   9.5100000e-01   9.9100000e-01
   8.2060000e+00   2.4000000e+01   5.0996911e+04   3.0876170e+03   9.3237180e+03   4.3812700e+02   4.3812700e+02   9.3499600e+02   2.8800000e+02   7.3886800e+02   3.5630000e+00   9.9800000e-01   1.8296000e+01   1.0410000e+00   6.0862000e+01   1.2050000e+00   9.5100000e-01   9.9100000e-01
   9.3000000e+00   2.7000000e+01   7.2774750e+04   3.5604360e+03   9.7895490e+03   6.4503500e+02   6.4503500e+02   1.1004100e+03   2.8800000e+02   7.8650600e+02   4.4790000e+00   9.9800000e-01   2.2383000e+01   1.0490000e+00   9.0792000e+01   1.7970000e+00   9.5100000e-01   9.9100000e-01
   1.1380000e+00   3.0000000e+00   1.0226610e+03   1.3163440e+03   6.6983020e+03   5.7480000e+00   5.7480000e+00   4.9514000e+02   2.8800000e+02   5.5222600e+02   1.1210000e+00   9.9800000e-01   6.0200000e+00   1.0190000e+00   2.4972000e+01   1.3500000e-01   9.5100000e-01   9.9200000e-01
   2.0880000e+00   6.0000000e+00   5.3040110e+03   1.3462600e+03   6.8510790e+03   2.2727000e+01   2.2727000e+01   5.8442600e+02   2.8800000e+02   5.7219900e+02   1.2730000e+00   9.9800000e-01   6.8560000e+00   1.0190000e+00   2.3037000e+01   2.4000000e-01   9.5100000e-01   9.9200000e-01
   3.1440000e+00   9.0000000e+00   8.3808620e+03   1.3867670e+03   7.1535370e+03   6.0375000e+01   6.0375000e+01   5.9161600e+02   2.8800000e+02   5.8482500e+02   1.3870000e+00   9.9800000e-01   7.4510000e+00   1.0200000e+00   1.2493000e+01   2.4700000e-01   9.5100000e-01   9.9200000e-01
   4.1610000e+00   1.2000000e+01   1.4725718e+04   1.5474750e+03   7.8246880e+03   1.1380000e+02   1.1380000e+02   6.4593600e+02   2.8800000e+02   6.1088300e+02   1.6540000e+00   9.9800000e-01   8.8550000e+00   1.0220000e+00   1.7370000e+01   3.4400000e-01   9.5100000e-01   9.9200000e-01
   5.1400000e+00   1.5000000e+01   2.1639200e+04   1.9243420e+03   8.5093590e+03   1.7530600e+02   1.7530600e+02   7.1429500e+02   2.8800000e+02   6.4229300e+02   2.0740000e+00   9.9800000e-01   1.1005000e+01   1.0260000e+00   2.5397000e+01   5.0300000e-01   9.5100000e-01   9.9200000e-01
   6.1750000e+00   1.8000000e+01   2.9797492e+04   2.3072430e+03   8.8448510e+03   2.4636100e+02   2.4636100e+02   7.8105700e+02   2.8800000e+02   6.7237300e+02   2.4960000e+00   9.9800000e-01   1.3125000e+01   1.0300000e+00   3.4505000e+01   6.8300000e-01   9.5100000e-01   9.9200000e-01
   7.1480000e+00   2.1000000e+01   3.8976264e+04   2.6780740e+03   9.1404870e+03   3.3205300e+02   3.3205300e+02   8.3654800e+02   2.8800000e+02   6.9672300e+02   2.9540000e+00   9.9800000e-01   1.5392000e+01   1.0350000e+00   4.4471000e+01   8.8000000e-01   9.5100000e-01   9.9200000e-01
   8.2060000e+00   2.4000000e+01   5.0996795e+04   3.0876150e+03   9.3240720e+03   4.3812100e+02   4.3812100e+02   9.3399300e+02   2.8800000e+02   7.3871200e+02   3.5620000e+00   9.9800000e-01   1.8275000e+01   1.0410000e+00   6.0767000e+01   1.2030000e+00   9.5100000e-01   9.9200000e-01
   9.3000000e+00   2.7000000e+01   7.2776613e+04   3.5604300e+03   9.7902930e+03   6.4502100e+02   6.4502100e+02   1.0995490e+03   2.8800000e+02   7.8637500e+02   4.4780000e+00   9.9800000e-01   2.2357000e+01   1.0490000e+00   9.0690000e+01   1.7950000e+00   9.5100000e-01   9.9200000e-01
   1.1380000e+00   3.0000000e+00   9.6772400e+02   1.3175310e+03   6.7015430e+03   5.8100000e+00   5.8100000e+00   4.9211000e+02   2.8800000e+02   5.5190300e+02   1.1190000e+00   9.9800000e-01   6.0080000e+00   1.0190000e+00   2.4091000e+01   1.3200000e-01   9.5100000e-01   9.9300000e-01
   2.0880000e+00   6.0000000e+00   5.2709470e+03   1.3462240e+03   6.8535950e+03   2.2712000e+01   2.2712000e+01   5.8275300e+02   2.8800000e+02   5.7192800e+02   1.2720000e+00   9.9800000e-01   6.8440000e+00   1.0190000e+00   2.3006000e+01   2.3800000e-01   9.5100000e-01   9.9300000e-01
   3.1440000e+00   9.0000000e+00   8.3809200e+03   1.3867670e+03   7.1561310e+03   6.0374000e+01   6.0374000e+01   5.9081300e+02   2.8800000e+02   5.8467600e+02   1.3870000e+00   9.9800000e-01   7.4430000e+00   1.0200000e+00   1.2460000e+01   2.4700000e-01   9.5100000e-01   9.9300000e-01
   4.1610000e+00   1.2000000e+01   1.4725820e+04   1.5474760e+03   7.8267280e+03   1.1381500e+02   1.1381500e+02   6.4507000e+02   2.8800000e+02   6.1072400e+02   1.6540000e+00   9.9800000e-01   8.8460000e+00   1.0220000e+00   1.7328000e+01   3.4300000e-01   9.5100000e-01   9.9300000e-01
   5.1400000e+00   1.5000000e+01   2.1639170e+04   1.9243450e+03   8.5102700e+03   1.7530700e+02   1.7530700e+02   7.1333700e+02   2.8800000e+02   6.4211400e+02   2.0740000e+00   9.9800000e-01   1.0994000e+01   1.0260000e+00   2.5342000e+01   5.0200000e-01   9.5100000e-01   9.9300000e-01
   6.1750000e+00   1.8000000e+01   2.9797832e+04   2.3072400e+03   8.8458890e+03   2.4631400e+02   2.4631400e+02   7.7997800e+02   2.8800000e+02   6.7215700e+02   2.4950000e+00   9.9800000e-01   1.3112000e+01   1.0300000e+00   3.4435000e+01   6.8200000e-01   9.5100000e-01   9.9300000e-01
   7.1480000e+00   2.1000000e+01   3.8976011e+04   2.6780750e+03   9.1409930e+03   3.3214300e+02   3.3214300e+02   8.3553700e+02   2.8800000e+02   6.9655600e+02   2.9530000e+00   9.9800000e-01   1.5376000e+01   1.0350000e+00   4.4392000e+01   8.7900000e-01   9.5100000e-01   9.9300000e-01
   8.2060000e+00   2.4000000e+01   5.0996726e+04   3.0876110e+03   9.3244250e+03   4.3812500e+02   4.3812500e+02   9.3299400e+02   2.8800000e+02   7.3855700e+02   3.5610000e+00   9.9800000e-01   1.8254000e+01   1.0410000e+00   6.0673000e+01   1.2010000e+00   9.5100000e-01   9.9300000e-01
   9.3000000e+00   2.7000000e+01   7.2776725e+04   3.5604380e+03   9.7910120e+03   6.4482300e+02   6.4482300e+02   1.0986820e+03   2.8800000e+02   7.8624300e+02   4.4770000e+00   9.9800000e-01   2.2330000e+01   1.0490000e+00   9.0586000e+01   1.7930000e+00   9.5100000e-01   9.9300000e-01
   1.1380000e+00   3.0000000e+00   2.6936200e+02   1.3348740e+03   6.7140340e+03   6.7440000e+00   6.7440000e+00   4.5768000e+02   2.8800000e+02   5.4751400e+02   1.0930000e+00   9.9800000e-01   5.8420000e+00   1.0190000e+00   1.3171000e+01   8.5000000e-02   9.5100000e-01   9.9400000e-01
   2.0880000e+00   6.0000000e+00   4.9751670e+03   1.3451990e+03   6.8554690e+03   2.2523000e+01   2.2523000e+01   5.7427700e+02   2.8800000e+02   5.7064300e+02   1.2630000e+00   9.9800000e-01   6.7880000e+00   1.0190000e+00   2.3125000e+01   2.2800000e-01   9.5100000e-01   9.9400000e-01
   3.1440000e+00   9.0000000e+00   8.3810470e+03   1.3867680e+03   7.1587310e+03   6.0370000e+01   6.0370000e+01   5.9001100e+02   2.8800000e+02   5.8452800e+02   1.3870000e+00   9.9800000e-01   7.4360000e+00   1.0200000e+00   1.2427000e+01   2.4600000e-01   9.5100000e-01   9.9400000e-01
   4.1610000e+00   1.2000000e+01   1.4725899e+04   1.5474760e+03   7.8287670e+03   1.1381400e+02   1.1381400e+02   6.4420600e+02   2.8800000e+02   6.1056500e+02   1.6540000e+00   9.9800000e-01   8.8370000e+00   1.0220000e+00   1.7286000e+01   3.4200000e-01   9.5100000e-01   9.9400000e-01
   5.1400000e+00   1.5000000e+01   2.1639525e+04   1.9243460e+03   8.5111930e+03   1.7532900e+02   1.7532900e+02   7.1238300e+02   2.8800000e+02   6.4193600e+02   2.0730000e+00   9.9800000e-01   1.0983000e+01   1.0260000e+00   2.5287000e+01   5.0100000e-01   9.5100000e-01   9.9400000e-01
   6.1750000e+00   1.8000000e+01   2.9797882e+04   2.3072300e+03   8.8469100e+03   2.4637000e+02   2.4637000e+02   7.7890300e+02   2.8800000e+02   6.7194100e+02   2.4950000e+00   9.9800000e-01   1.3098000e+01   1.0300000e+00   3.4364000e+01   6.8000000e-01   9.5100000e-01   9.9400000e-01
   7.1480000e+00   2.1000000e+01   3.8975725e+04   2.6780740e+03   9.1414980e+03   3.3206000e+02   3.3206000e+02   8.3452900e+02   2.8800000e+02   6.9639000e+02   2.9530000e+00   9.9800000e-01   1.5359000e+01   1.0350000e+00   4.4312000e+01   8.7700000e-01   9.5100000e-01   9.9400000e-01
   8.2060000e+00   2.4000000e+01   5.0995806e+04   3.0875910e+03   9.3248070e+03   4.3805000e+02   4.3805000e+02   9.3197300e+02   2.8800000e+02   7.3840400e+02   3.5600000e+00   9.9800000e-01   1.8233000e+01   1.0410000e+00   6.0578000e+01   1.1990000e+00   9.5100000e-01   9.9400000e-01
   9.3000000e+00   2.7000000e+01   7.2777624e+04   3.5604350e+03   9.7917350e+03   6.4505700e+02   6.4505700e+02   1.0978200e+03   2.8800000e+02   7.8611300e+02   4.4760000e+00   9.9800000e-01   2.2303000e+01   1.0490000e+00   9.0483000e+01   1.7910000e+00   9.5100000e-01   9.9400000e-01
   1.1380000e+00   3.0000000e+00   2.6766800e+02   1.3456410e+03   6.7235390e+03   7.3350000e+00   7.3350000e+00   4.5124100e+02   2.8800000e+02   5.4728200e+02   1.0940000e+00   9.9800000e-01   5.8330000e+00   1.0190000e+00   6.7930000e+00   7.3000000e-02   9.5100000e-01   9.9500000e-01
   2.0880000e+00   6.0000000e+00   4.5476300e+03   1.3444490e+03   6.8575440e+03   2.2378000e+01   2.2378000e+01   5.6199200e+02   2.8800000e+02   5.6876100e+02   1.2490000e+00   9.9800000e-01   6.7050000e+00   1.0190000e+00   2.3184000e+01   2.1300000e-01   9.5100000e-01   9.9500000e-01
   3.1440000e+00   9.0000000e+00   8.3811260e+03   1.3867680e+03   7.1613280e+03   6.0377000e+01   6.0377000e+01   5.8921100e+02   2.8800000e+02   5.8438000e+02   1.3870000e+00   9.9800000e-01   7.4290000e+00   1.0200000e+00   1.2393000e+01   2.4500000e-01   9.5100000e-01   9.9500000e-01
   4.1610000e+00   1.2000000e+01   1.4725966e+04   1.5474770e+03   7.8308070e+03   1.1381000e+02   1.1381000e+02   6.4334400e+02   2.8800000e+02   6.1040700e+02   1.6540000e+00   9.9800000e-01   8.8280000e+00   1.0220000e+00   1.7245000e+01   3.4100000e-01   9.5100000e-01   9.9500000e-01
   5.1400000e+00   1.5000000e+01   2.1639652e+04   1.9243480e+03   8.5121090e+03   1.7530700e+02   1.7530700e+02   7.1143000e+02   2.8800000e+02   6.4175800e+02   2.0730000e+00   9.9800000e-01   1.0971000e+01   1.0260000e+00   2.5232000e+01   4.9900000e-01   9.5100000e-01   9.9500000e-01
   6.1750000e+00   1.8000000e+01   2.9798172e+04   2.3072270e+03   8.8479460e+03   2.4629800e+02   2.4629800e+02   7.7783100e+02   2.8800000e+02   6.7172500e+02   2.4950000e+00   9.9800000e-01   1.3085000e+01   1.0300000e+00   3.4294000e+01   6.7900000e-01   9.5100000e-01   9.9500000e-01
   7.1480000e+00   2.1000000e+01   3.8975439e+04   2.6780760e+03   9.1420040e+03   3.3201400e+02   3.3201400e+02   8.3352300e+02   2.8800000e+02   6.9622500e+02   2.9520000e+00   9.9800000e-01   1.5342000e+01   1.0350000e+00   4.4233000e+01   8.7600000e-01   9.5100000e-01   9.9500000e-01
   8.2060000e+00   2.4000000e+01   5.0995238e+04   3.0875780e+03   9.3252000e+03   4.3796700e+02   4.3796700e+02   9.3095500e+02   2.8800000e+02   7.3825200e+02   3.5590000e+00   9.9800000e-01   1.8213000e+01   1.0410000e+00   6.0482000e+01   1.1970000e+00   9.5100000e-01   9.9500000e-01
   9.3000000e+00   2.7000000e+01   7.2778089e+04   3.5604410e+03   9.7924520e+03   6.4481600e+02   6.4481600e+02   1.0969590e+03   2.8800000e+02   7.8598300e+02   4.4740000e+00   9.9800000e-01   2.2277000e+01   1.0490000e+00   9.0381000e+01   1.7890000e+00   9.5100000e-01   9.9500000e-01
   1.1380000e+00   3.0000000e+00   5.1867400e+02   1.3601450e+03   6.7358280e+03   8.1550000e+00   8.1550000e+00   4.5489100e+02   2.8800000e+02   5.4875700e+02   1.1050000e+00   9.9800000e-01   5.8900000e+00   1.0190000e+00   0.0000000e+00   7.3000000e-02   9.5100000e-01   9.9600000e-01
   2.0880000e+00   6.0000000e+00   4.6823130e+03   1.3447720e+03   6.8603540e+03   2.2443000e+01   2.2443000e+01   5.6480900e+02   2.8800000e+02   5.6914900e+02   1.2530000e+00   9.9800000e-01   6.7220000e+00   1.0190000e+00   2.3083000e+01   2.1700000e-01   9.5100000e-01   9.9600000e-01
   3.1440000e+00   9.0000000e+00   8.3812620e+03   1.3867690e+03   7.1639300e+03   6.0375000e+01   6.0375000e+01   5.8841300e+02   2.8800000e+02   5.8423200e+02   1.3870000e+00   9.9800000e-01   7.4220000e+00   1.0200000e+00   1.2360000e+01   2.4500000e-01   9.5100000e-01   9.9600000e-01
   4.1610000e+00   1.2000000e+01   1.4726051e+04   1.5474780e+03   7.8328510e+03   1.1381500e+02   1.1381500e+02   6.4248400e+02   2.8800000e+02   6.1024900e+02   1.6530000e+00   9.9800000e-01   8.8190000e+00   1.0220000e+00   1.7203000e+01   3.4100000e-01   9.5100000e-01   9.9600000e-01
   5.1400000e+00   1.5000000e+01   2.1639475e+04   1.9243500e+03   8.5130170e+03   1.7532700e+02   1.7532700e+02   7.1047800e+02   2.8800000e+02   6.4158000e+02   2.0730000e+00   9.9800000e-01   1.0960000e+01   1.0260000e+00   2.5177000e+01   4.9800000e-01   9.5100000e-01   9.9600000e-01
   6.1750000e+00   1.8000000e+01   2.9798399e+04   2.3072230e+03   8.8489790e+03   2.4632900e+02   2.4632900e+02   7.7676100e+02   2.8800000e+02   6.7151100e+02   2.4940000e+00   9.9800000e-01   1.3071000e+01   1.0300000e+00   3.4224000e+01   6.7800000e-01   9.5100000e-01   9.9600000e-01
   7.1480000e+00   2.1000000e+01   3.8975114e+04   2.6780770e+03   9.1425080e+03   3.3207500e+02   3.3207500e+02   8.3252000e+02   2.8800000e+02   6.9606000e+02   2.9510000e+00   9.9800000e-01   1.5326000e+01   1.0350000e+00   4.4154000e+01   8.7400000e-01   9.5100000e-01   9.9600000e-01
   8.2060000e+00   2.4000000e+01   5.0994986e+04   3.0875690e+03   9.3255970e+03   4.3799600e+02   4.3799600e+02   9.2994100e+02   2.8800000e+02   7.3810200e+02   3.5580000e+00   9.9800000e-01   1.8192000e+01   1.0410000e+00   6.0388000e+01   1.1950000e+00   9.5100000e-01   9.9600000e-01
   9.3000000e+00   2.7000000e+01   7.2778688e+04   3.5604460e+03   9.7931660e+03   6.4502400e+02   6.4502400e+02   1.0961010e+03   2.8800000e+02   7.8585400e+02   4.4730000e+00   9.9800000e-01   2.2250000e+01   1.0490000e+00   9.0278000e+01   1.7870000e+00   9.5100000e-01   9.9600000e-01
   1.1380000e+00   3.0000000e+00   8.1708000e+02   1.3728480e+03   6.7470040e+03   8.8790000e+00   8.8790000e+00   4.6289900e+02   2.8800000e+02   5.5049000e+02   1.1180000e+00   9.9800000e-01   5.9560000e+00   1.0190000e+00   0.0000000e+00   8.2000000e-02   9.5100000e-01   9.9700000e-01
   2.0880000e+00   6.0000000e+00   4.4321160e+03   1.3446230e+03   6.8627440e+03   2.2406000e+01   2.2406000e+01   5.5723900e+02   2.8800000e+02   5.6800100e+02   1.2450000e+00   9.9800000e-01   6.6730000e+00   1.0190000e+00   2.2945000e+01   2.0800000e-01   9.5100000e-01   9.9700000e-01
   3.1440000e+00   9.0000000e+00   8.3813520e+03   1.3867700e+03   7.1665280e+03   6.0375000e+01   6.0375000e+01   5.8761600e+02   2.8800000e+02   5.8408400e+02   1.3860000e+00   9.9800000e-01   7.4150000e+00   1.0200000e+00   1.2327000e+01   2.4400000e-01   9.5100000e-01   9.9700000e-01
   4.1610000e+00   1.2000000e+01   1.4726161e+04   1.5474780e+03   7.8348980e+03   1.1379700e+02   1.1379700e+02   6.4162600e+02   2.8800000e+02   6.1009200e+02   1.6530000e+00   9.9800000e-01   8.8110000e+00   1.0220000e+00   1.7162000e+01   3.4000000e-01   9.5100000e-01   9.9700000e-01
   5.1400000e+00   1.5000000e+01   2.1639980e+04   1.9243510e+03   8.5139450e+03   1.7531800e+02   1.7531800e+02   7.0953200e+02   2.8800000e+02   6.4140300e+02   2.0730000e+00   9.9800000e-01   1.0949000e+01   1.0260000e+00   2.5123000e+01   4.9700000e-01   9.5100000e-01   9.9700000e-01
   6.1750000e+00   1.8000000e+01   2.9798492e+04   2.3072190e+03   8.8500060e+03   2.4633400e+02   2.4633400e+02   7.7569500e+02   2.8800000e+02   6.7129600e+02   2.4940000e+00   9.9800000e-01   1.3058000e+01   1.0300000e+00   3.4154000e+01   6.7600000e-01   9.5100000e-01   9.9700000e-01
   7.1480000e+00   2.1000000e+01   3.8974897e+04   2.6780740e+03   9.1430130e+03   3.3203000e+02   3.3203000e+02   8.3152000e+02   2.8800000e+02   6.9589500e+02   2.9510000e+00   9.9800000e-01   1.5309000e+01   1.0350000e+00   4.4076000e+01   8.7300000e-01   9.5100000e-01   9.9700000e-01
   8.2060000e+00   2.4000000e+01   5.0994810e+04   3.0875630e+03   9.3259950e+03   4.3796700e+02   4.3796700e+02   9.2893100e+02   2.8800000e+02   7.3795300e+02   3.5580000e+00   9.9800000e-01   1.8172000e+01   1.0410000e+00   6.0294000e+01   1.1940000e+00   9.5100000e-01   9.9700000e-01
   9.3000000e+00   2.7000000e+01   7.2780629e+04   3.5604930e+03   9.7939050e+03   6.4517800e+02   6.4517800e+02   1.0952580e+03   2.8800000e+02   7.8572800e+02   4.4720000e+00   9.9800000e-01   2.2224000e+01   1.0490000e+00   9.0178000e+01   1.7850000e+00   9.5100000e-01   9.9700000e-01
   1.1380000e+00   3.0000000e+00   7.9232800e+02   1.3717430e+03   6.7488600e+03   8.8120000e+00   8.8120000e+00   4.6152000e+02   2.8800000e+02   5.5013400e+02   1.1170000e+00   9.9800000e-01   5.9430000e+00   1.0190000e+00   0.0000000e+00   8.0000000e-02   9.5100000e-01   9.9800000e-01
   2.0880000e+00   6.0000000e+00   4.3575170e+03   1.3446280e+03   6.8652860e+03   2.2408000e+01   2.2408000e+01   5.5431800e+02   2.8800000e+02   5.6750000e+02   1.2430000e+00   9.9800000e-01   6.6510000e+00   1.0190000e+00   2.2891000e+01   2.0500000e-01   9.5100000e-01   9.9800000e-01
   3.1440000e+00   9.0000000e+00   8.3815110e+03   1.3867700e+03   7.1691330e+03   6.0386000e+01   6.0386000e+01   5.8682200e+02   2.8800000e+02   5.8393700e+02   1.3860000e+00   9.9800000e-01   7.4080000e+00   1.0200000e+00   1.2294000e+01   2.4300000e-01   9.5100000e-01   9.9800000e-01
   4.1610000e+00   1.2000000e+01   1.4726217e+04   1.5474790e+03   7.8369420e+03   1.1381500e+02   1.1381500e+02   6.4077000e+02   2.8800000e+02   6.0993400e+02   1.6530000e+00   9.9800000e-01   8.8020000e+00   1.0220000e+00   1.7121000e+01   3.3900000e-01   9.5100000e-01   9.9800000e-01
   5.1400000e+00   1.5000000e+01   2.1639896e+04   1.9243540e+03   8.5148560e+03   1.7532800e+02   1.7532800e+02   7.0858500e+02   2.8800000e+02   6.4122600e+02   2.0720000e+00   9.9800000e-01   1.0938000e+01   1.0260000e+00   2.5068000e+01   4.9600000e-01   9.5100000e-01   9.9800000e-01
   6.1750000e+00   1.8000000e+01   2.9798524e+04   2.3072120e+03   8.8510300e+03   2.4632000e+02   2.4632000e+02   7.7463200e+02   2.8800000e+02   6.7108200e+02   2.4940000e+00   9.9800000e-01   1.3045000e+01   1.0300000e+00   3.4085000e+01   6.7500000e-01   9.5100000e-01   9.9800000e-01
   7.1480000e+00   2.1000000e+01   3.8974563e+04   2.6780750e+03   9.1435160e+03   3.3209500e+02   3.3209500e+02   8.3052200e+02   2.8800000e+02   6.9573100e+02   2.9500000e+00   9.9800000e-01   1.5293000e+01   1.0350000e+00   4.3997000e+01   8.7100000e-01   9.5100000e-01   9.9800000e-01
   8.2060000e+00   2.4000000e+01   5.0994731e+04   3.0875570e+03   9.3263930e+03   4.3803900e+02   4.3803900e+02   9.2792500e+02   2.8800000e+02   7.3780500e+02   3.5570000e+00   9.9800000e-01   1.8152000e+01   1.0410000e+00   6.0200000e+01   1.1920000e+00   9.5100000e-01   9.9800000e-01
   9.3000000e+00   2.7000000e+01   7.2781069e+04   3.5606510e+03   9.7946450e+03   6.4494000e+02   6.4494000e+02   1.0944190e+03   2.8800000e+02   7.8560300e+02   4.4710000e+00   9.9800000e-01   2.2198000e+01   1.0490000e+00   9.0078000e+01   1.7830000e+00   9.5100000e-01   9.9800000e-01
   1.1380000e+00   3.0000000e+00   1.0967460e+03   1.3833340e+03   6.7592750e+03   9.4900000e+00   9.4900000e+00   4.6973000e+02   2.8800000e+02   5.5176200e+02   1.1310000e+00   9.9800000e-01   6.0050000e+00   1.0190000e+00   0.0000000e+00   9.0000000e-02   9.5100000e-01   9.9900000e-01
   2.0880000e+00   6.0000000e+00   4.0989410e+03   1.3451280e+03   6.8681260e+03   2.2488000e+01   2.2488000e+01   5.4617200e+02   2.8800000e+02   5.6630600e+02   1.2350000e+00   9.9800000e-01   6.6000000e+00   1.0190000e+00   2.2154000e+01   1.9500000e-01   9.5100000e-01   9.9900000e-01
   3.1440000e+00   9.0000000e+00   8.3815380e+03   1.3867710e+03   7.1717290e+03   6.0377000e+01   6.0377000e+01   5.8602800e+02   2.8800000e+02   5.8378900e+02   1.3860000e+00   9.9800000e-01   7.4010000e+00   1.0200000e+00   1.2260000e+01   2.4300000e-01   9.5100000e-01   9.9900000e-01
   4.1610000e+00   1.2000000e+01   1.4726348e+04   1.5474800e+03   7.8389940e+03   1.1379600e+02   1.1379600e+02   6.3991700e+02   2.8800000e+02   6.0977700e+02   1.6530000e+00   9.9800000e-01   8.7930000e+00   1.0220000e+00   1.7080000e+01   3.3800000e-01   9.5100000e-01   9.9900000e-01
   5.1400000e+00   1.5000000e+01   2.1640332e+04   1.9243550e+03   8.5157820e+03   1.7533400e+02   1.7533400e+02   7.0764400e+02   2.8800000e+02   6.4105000e+02   2.0720000e+00   9.9800000e-01   1.0927000e+01   1.0260000e+00   2.5014000e+01   4.9500000e-01   9.5100000e-01   9.9900000e-01
   6.1750000e+00   1.8000000e+01   2.9798623e+04   2.3072080e+03   8.8520590e+03   2.4631600e+02   2.4631600e+02   7.7357100e+02   2.8800000e+02   6.7086900e+02   2.4930000e+00   9.9800000e-01   1.3031000e+01   1.0300000e+00   3.4015000e+01   6.7300000e-01   9.5100000e-01   9.9900000e-01
   7.1480000e+00   2.1000000e+01   3.8974385e+04   2.6780750e+03   9.1440210e+03   3.3201100e+02   3.3201100e+02   8.2952800e+02   2.8800000e+02   6.9556700e+02   2.9500000e+00   9.9800000e-01   1.5276000e+01   1.0350000e+00   4.3919000e+01   8.7000000e-01   9.5100000e-01   9.9900000e-01
   8.2060000e+00   2.4000000e+01   5.0994595e+04   3.0875550e+03   9.3267900e+03   4.3796700e+02   4.3796700e+02   9.2692100e+02   2.8800000e+02   7.3765700e+02   3.5560000e+00   9.9800000e-01   1.8132000e+01   1.0410000e+00   6.0106000e+01   1.1900000e+00   9.5100000e-01   9.9900000e-01
   9.3000000e+00   2.7000000e+01   7.2783338e+04   3.5607400e+03   9.7953860e+03   6.4524900e+02   6.4524900e+02   1.0935880e+03   2.8800000e+02   7.8547900e+02   4.4700000e+00   9.9800000e-01   2.2172000e+01   1.0490000e+00   8.9979000e+01   1.7810000e+00   9.5100000e-01   9.9900000e-01
   1.1380000e+00   3.0000000e+00   1.1330800e+03   1.3842310e+03   6.7624260e+03   9.5380000e+00   9.5380000e+00   4.7025000e+02   2.8800000e+02   5.5187200e+02   1.1320000e+00   9.9800000e-01   6.0100000e+00   1.0190000e+00   0.0000000e+00   9.1000000e-02   9.5100000e-01   1.0000000e+00
   2.0880000e+00   6.0000000e+00   3.9232780e+03   1.3458120e+03   6.8711270e+03   2.2605000e+01   2.2605000e+01   5.4021900e+02   2.8800000e+02   5.6545900e+02   1.2290000e+00   9.9800000e-01   6.5640000e+00   1.0190000e+00   2.1315000e+01   1.8800000e-01   9.5100000e-01   1.0000000e+00
   3.1440000e+00   9.0000000e+00   8.3817480e+03   1.3867710e+03   7.1743380e+03   6.0393000e+01   6.0393000e+01   5.8523700e+02   2.8800000e+02   5.8364200e+02   1.3860000e+00   9.9800000e-01   7.3940000e+00   1.0200000e+00   1.2227000e+01   2.4200000e-01   9.5100000e-01   1.0000000e+00
   4.1610000e+00   1.2000000e+01   1.4726402e+04   1.5474800e+03   7.8410420e+03   1.1382200e+02   1.1382200e+02   6.3906500e+02   2.8800000e+02   6.0962000e+02   1.6530000e+00   9.9800000e-01   8.7840000e+00   1.0220000e+00   1.7038000e+01   3.3700000e-01   9.5100000e-01   1.0000000e+00
   5.1400000e+00   1.5000000e+01   2.1640162e+04   1.9243580e+03   8.5166910e+03   1.7532400e+02   1.7532400e+02   7.0670200e+02   2.8800000e+02   6.4087300e+02   2.0720000e+00   9.9800000e-01   1.0916000e+01   1.0260000e+00   2.4960000e+01   4.9400000e-01   9.5100000e-01   1.0000000e+00
   6.1750000e+00   1.8000000e+01   2.9798588e+04   2.3072030e+03   8.8530830e+03   2.4632100e+02   2.4632100e+02   7.7251400e+02   2.8800000e+02   6.7065600e+02   2.4930000e+00   9.9800000e-01   1.3018000e+01   1.0300000e+00   3.3946000e+01   6.7200000e-01   9.5100000e-01   1.0000000e+00
   7.1480000e+00   2.1000000e+01   3.8974100e+04   2.6780760e+03   9.1445240e+03   3.3211800e+02   3.3211800e+02   8.2853500e+02   2.8800000e+02   6.9540400e+02   2.9490000e+00   9.9800000e-01   1.5260000e+01   1.0350000e+00   4.3840000e+01   8.6800000e-01   9.5100000e-01   1.0000000e+00
   8.2060000e+00   2.4000000e+01   5.0994506e+04   3.0875530e+03   9.3271870e+03   4.3796000e+02   4.3796000e+02   9.2592100e+02   2.8800000e+02   7.3751000e+02   3.5550000e+00   9.9800000e-01   1.8111000e+01   1.0410000e+00   6.0012000e+01   1.1880000e+00   9.5100000e-01   1.0000000e+00
   9.3000000e+00   2.7000000e+01   7.2781851e+04   3.5607260e+03   9.7960520e+03   6.4521300e+02   6.4521300e+02   1.0927240e+03   2.8800000e+02   7.8535000e+02   4.4680000e+00   9.9800000e-01   2.2146000e+01   1.0490000e+00   8.9875000e+01   1.7790000e+00   9.5100000e-01   1.0000000e+00
   1.1380000e+00   3.0000000e+00   4.0823200e+02   1.3320160e+03   6.6616770e+03   6.6160000e+00   6.6160000e+00   4.7740100e+02   2.8800000e+02   5.5096700e+02   1.0990000e+00   9.9800000e-01   5.9770000e+00   1.0190000e+00   1.7335000e+01   1.0500000e-01   9.5200000e-01   9.7500000e-01
   2.0880000e+00   6.0000000e+00   6.9469560e+03   1.3691660e+03   6.8195770e+03   2.6915000e+01   2.6915000e+01   6.3614700e+02   2.8800000e+02   5.8101100e+02   1.3290000e+00   9.9800000e-01   7.2730000e+00   1.0190000e+00   1.4287000e+01   2.9100000e-01   9.5200000e-01   9.7500000e-01
   3.1440000e+00   9.0000000e+00   8.3789920e+03   1.3867560e+03   7.1071800e+03   6.0351000e+01   6.0351000e+01   6.0506100e+02   2.8800000e+02   5.8714000e+02   1.3890000e+00   9.9800000e-01   7.5750000e+00   1.0200000e+00   1.3052000e+01   2.5800000e-01   9.5200000e-01   9.7500000e-01
   4.1610000e+00   1.2000000e+01   1.4724150e+04   1.5474640e+03   7.7879800e+03   1.1379400e+02   1.1379400e+02   6.6052300e+02   2.8800000e+02   6.1340400e+02   1.6580000e+00   9.9800000e-01   9.0090000e+00   1.0220000e+00   1.8072000e+01   3.5800000e-01   9.5200000e-01   9.7500000e-01
   5.1400000e+00   1.5000000e+01   2.1635868e+04   1.9243120e+03   8.4928210e+03   1.7532000e+02   1.7532000e+02   7.3040200e+02   2.8800000e+02   6.4513300e+02   2.0790000e+00   9.9800000e-01   1.1200000e+01   1.0260000e+00   2.6325000e+01   5.2100000e-01   9.5200000e-01   9.7500000e-01
   6.1750000e+00   1.8000000e+01   2.9792076e+04   2.3074240e+03   8.8261590e+03   2.4621600e+02   2.4621600e+02   7.9935700e+02   2.8800000e+02   6.7589900e+02   2.5020000e+00   9.9800000e-01   1.3360000e+01   1.0300000e+00   3.5708000e+01   7.0700000e-01   9.5200000e-01   9.7500000e-01
   7.1480000e+00   2.1000000e+01   3.8983463e+04   2.6780850e+03   9.1314150e+03   3.3222400e+02   3.3222400e+02   8.5337100e+02   2.8800000e+02   6.9931100e+02   2.9650000e+00   9.9800000e-01   1.5685000e+01   1.0350000e+00   4.5809000e+01   9.0700000e-01   9.5200000e-01   9.7500000e-01
   8.2060000e+00   2.4000000e+01   5.0996440e+04   3.0875470e+03   9.3173200e+03   4.3800900e+02   4.3800900e+02   9.5076200e+02   2.8800000e+02   7.4111800e+02   3.5780000e+00   9.9800000e-01   1.8639000e+01   1.0410000e+00   6.2361000e+01   1.2350000e+00   9.5200000e-01   9.7500000e-01
   9.3000000e+00   2.7000000e+01   7.2762643e+04   3.5603960e+03   9.7761380e+03   6.4489900e+02   6.4489900e+02   1.1134330e+03   2.8800000e+02   7.8835200e+02   4.5000000e+00   9.9800000e-01   2.2824000e+01   1.0490000e+00   9.2397000e+01   1.8290000e+00   9.5200000e-01   9.7500000e-01
   1.1380000e+00   3.0000000e+00   3.1137800e+02   1.3504880e+03   6.6760980e+03   7.6380000e+00   7.6380000e+00   4.6281400e+02   2.8800000e+02   5.5012500e+02   1.0970000e+00   9.9800000e-01   5.9460000e+00   1.0190000e+00   6.3040000e+00   8.0000000e-02   9.5200000e-01   9.7600000e-01
   2.0880000e+00   6.0000000e+00   6.9406330e+03   1.3687410e+03   6.8218460e+03   2.6826000e+01   2.6826000e+01   6.3518200e+02   2.8800000e+02   5.8080500e+02   1.3290000e+00   9.9800000e-01   7.2630000e+00   1.0190000e+00   1.4080000e+01   2.9000000e-01   9.5200000e-01   9.7600000e-01
   3.1440000e+00   9.0000000e+00   8.3790740e+03   1.3867570e+03   7.1097610e+03   6.0346000e+01   6.0346000e+01   6.0422900e+02   2.8800000e+02   5.8699000e+02   1.3890000e+00   9.9800000e-01   7.5680000e+00   1.0200000e+00   1.3017000e+01   2.5800000e-01   9.5200000e-01   9.7600000e-01
   4.1610000e+00   1.2000000e+01   1.4724219e+04   1.5474640e+03   7.7899850e+03   1.1379500e+02   1.1379500e+02   6.5962000e+02   2.8800000e+02   6.1324000e+02   1.6580000e+00   9.9800000e-01   9.0000000e+00   1.0220000e+00   1.8029000e+01   3.5700000e-01   9.5200000e-01   9.7600000e-01
   5.1400000e+00   1.5000000e+01   2.1635855e+04   1.9243140e+03   8.4937290e+03   1.7528000e+02   1.7528000e+02   7.2940200e+02   2.8800000e+02   6.4494700e+02   2.0790000e+00   9.9800000e-01   1.1188000e+01   1.0260000e+00   2.6268000e+01   5.2000000e-01   9.5200000e-01   9.7600000e-01
   6.1750000e+00   1.8000000e+01   2.9792449e+04   2.3074130e+03   8.8271990e+03   2.4620700e+02   2.4620700e+02   7.9822200e+02   2.8800000e+02   6.7567300e+02   2.5020000e+00   9.9800000e-01   1.3346000e+01   1.0300000e+00   3.5635000e+01   7.0600000e-01   9.5200000e-01   9.7600000e-01
   7.1480000e+00   2.1000000e+01   3.8983051e+04   2.6780860e+03   9.1319160e+03   3.3209400e+02   3.3209400e+02   8.5232500e+02   2.8800000e+02   6.9913600e+02   2.9640000e+00   9.9800000e-01   1.5668000e+01   1.0350000e+00   4.5727000e+01   9.0500000e-01   9.5200000e-01   9.7600000e-01
   8.2060000e+00   2.4000000e+01   5.0996907e+04   3.0875700e+03   9.3176950e+03   4.3811100e+02   4.3811100e+02   9.4971300e+02   2.8800000e+02   7.4095300e+02   3.5770000e+00   9.9800000e-01   1.8618000e+01   1.0410000e+00   6.2264000e+01   1.2330000e+00   9.5200000e-01   9.7600000e-01
   9.3000000e+00   2.7000000e+01   7.2763295e+04   3.5603990e+03   9.7769340e+03   6.4504200e+02   6.4504200e+02   1.1125260e+03   2.8800000e+02   7.8820600e+02   4.4990000e+00   9.9800000e-01   2.2797000e+01   1.0490000e+00   9.2290000e+01   1.8270000e+00   9.5200000e-01   9.7600000e-01
   1.1380000e+00   3.0000000e+00   4.7710000e+02   1.3598970e+03   6.6850750e+03   8.1620000e+00   8.1620000e+00   4.6468200e+02   2.8800000e+02   5.5102200e+02   1.1040000e+00   9.9800000e-01   5.9810000e+00   1.0190000e+00   1.1020000e+00   7.9000000e-02   9.5200000e-01   9.7700000e-01
   2.0880000e+00   6.0000000e+00   6.7941470e+03   1.3630890e+03   6.8209040e+03   2.5790000e+01   2.5790000e+01   6.3198200e+02   2.8800000e+02   5.8005100e+02   1.3230000e+00   9.9800000e-01   7.2270000e+00   1.0190000e+00   1.7266000e+01   2.8800000e-01   9.5200000e-01   9.7700000e-01
   3.1440000e+00   9.0000000e+00   8.3791680e+03   1.3867570e+03   7.1123440e+03   6.0346000e+01   6.0346000e+01   6.0339900e+02   2.8800000e+02   5.8684000e+02   1.3890000e+00   9.9800000e-01   7.5600000e+00   1.0200000e+00   1.2983000e+01   2.5700000e-01   9.5200000e-01   9.7700000e-01
   4.1610000e+00   1.2000000e+01   1.4724258e+04   1.5474650e+03   7.7919890e+03   1.1379500e+02   1.1379500e+02   6.5871900e+02   2.8800000e+02   6.1307700e+02   1.6580000e+00   9.9800000e-01   8.9910000e+00   1.0220000e+00   1.7985000e+01   3.5600000e-01   9.5200000e-01   9.7700000e-01
   5.1400000e+00   1.5000000e+01   2.1636331e+04   1.9243150e+03   8.4946510e+03   1.7529600e+02   1.7529600e+02   7.2840800e+02   2.8800000e+02   6.4476400e+02   2.0780000e+00   9.9800000e-01   1.1177000e+01   1.0260000e+00   2.6211000e+01   5.1900000e-01   9.5200000e-01   9.7700000e-01
   6.1750000e+00   1.8000000e+01   2.9792795e+04   2.3074020e+03   8.8282370e+03   2.4621300e+02   2.4621300e+02   7.9709000e+02   2.8800000e+02   6.7544600e+02   2.5010000e+00   9.9800000e-01   1.3332000e+01   1.0300000e+00   3.5561000e+01   7.0400000e-01   9.5200000e-01   9.7700000e-01
   7.1480000e+00   2.1000000e+01   3.8982581e+04   2.6780860e+03   9.1324160e+03   3.3211200e+02   3.3211200e+02   8.5128300e+02   2.8800000e+02   6.9896100e+02   2.9630000e+00   9.9800000e-01   1.5651000e+01   1.0350000e+00   4.5646000e+01   9.0400000e-01   9.5200000e-01   9.7700000e-01
   8.2060000e+00   2.4000000e+01   5.0997245e+04   3.0875900e+03   9.3180670e+03   4.3813500e+02   4.3813500e+02   9.4866600e+02   2.8800000e+02   7.4078800e+02   3.5760000e+00   9.9800000e-01   1.8596000e+01   1.0410000e+00   6.2166000e+01   1.2310000e+00   9.5200000e-01   9.7700000e-01
   9.3000000e+00   2.7000000e+01   7.2763637e+04   3.5604090e+03   9.7777240e+03   6.4499100e+02   6.4499100e+02   1.1116200e+03   2.8800000e+02   7.8806200e+02   4.4980000e+00   9.9800000e-01   2.2769000e+01   1.0490000e+00   9.2182000e+01   1.8250000e+00   9.5200000e-01   9.7700000e-01
   1.1380000e+00   3.0000000e+00   9.2899700e+02   1.3783490e+03   6.7003470e+03   9.2240000e+00   9.2240000e+00   4.7750900e+02   2.8800000e+02   5.5365200e+02   1.1240000e+00   9.9800000e-01   6.0830000e+00   1.0190000e+00   0.0000000e+00   9.3000000e-02   9.5200000e-01   9.7800000e-01
   2.0880000e+00   6.0000000e+00   6.7004500e+03   1.3607210e+03   6.8219780e+03   2.5366000e+01   2.5366000e+01   6.2920400e+02   2.8800000e+02   5.7948800e+02   1.3190000e+00   9.9800000e-01   7.2000000e+00   1.0190000e+00   1.8087000e+01   2.8600000e-01   9.5200000e-01   9.7800000e-01
   3.1440000e+00   9.0000000e+00   8.3793080e+03   1.3867580e+03   7.1149320e+03   6.0360000e+01   6.0360000e+01   6.0257100e+02   2.8800000e+02   5.8669000e+02   1.3890000e+00   9.9800000e-01   7.5530000e+00   1.0200000e+00   1.2949000e+01   2.5600000e-01   9.5200000e-01   9.7800000e-01
   4.1610000e+00   1.2000000e+01   1.4724382e+04   1.5474660e+03   7.7940020e+03   1.1378600e+02   1.1378600e+02   6.5782000e+02   2.8800000e+02   6.1291400e+02   1.6570000e+00   9.9800000e-01   8.9820000e+00   1.0220000e+00   1.7943000e+01   3.5500000e-01   9.5200000e-01   9.7800000e-01
   5.1400000e+00   1.5000000e+01   2.1636034e+04   1.9243180e+03   8.4955520e+03   1.7532100e+02   1.7532100e+02   7.2741100e+02   2.8800000e+02   6.4457800e+02   2.0780000e+00   9.9800000e-01   1.1165000e+01   1.0260000e+00   2.6154000e+01   5.1800000e-01   9.5200000e-01   9.7800000e-01
   6.1750000e+00   1.8000000e+01   2.9793053e+04   2.3073840e+03   8.8292700e+03   2.4623400e+02   2.4623400e+02   7.9596100e+02   2.8800000e+02   6.7522000e+02   2.5010000e+00   9.9800000e-01   1.3318000e+01   1.0300000e+00   3.5488000e+01   7.0300000e-01   9.5200000e-01   9.7800000e-01
   7.1480000e+00   2.1000000e+01   3.8982211e+04   2.6780860e+03   9.1329170e+03   3.3213500e+02   3.3213500e+02   8.5024300e+02   2.8800000e+02   6.9878600e+02   2.9630000e+00   9.9800000e-01   1.5633000e+01   1.0350000e+00   4.5564000e+01   9.0200000e-01   9.5200000e-01   9.7800000e-01
   8.2060000e+00   2.4000000e+01   5.0997479e+04   3.0876060e+03   9.3184360e+03   4.3808900e+02   4.3808900e+02   9.4762200e+02   2.8800000e+02   7.4062300e+02   3.5750000e+00   9.9800000e-01   1.8575000e+01   1.0410000e+00   6.2069000e+01   1.2290000e+00   9.5200000e-01   9.7800000e-01
   9.3000000e+00   2.7000000e+01   7.2765039e+04   3.5604050e+03   9.7785220e+03   6.4476100e+02   6.4476100e+02   1.1107220e+03   2.8800000e+02   7.8791800e+02   4.4960000e+00   9.9800000e-01   2.2742000e+01   1.0490000e+00   9.2076000e+01   1.8230000e+00   9.5200000e-01   9.7800000e-01
   1.1380000e+00   3.0000000e+00   1.4675620e+03   1.3948770e+03   6.7144170e+03   1.0206000e+01   1.0206000e+01   4.9305900e+02   2.8800000e+02   5.5684800e+02   1.1480000e+00   9.9800000e-01   6.2110000e+00   1.0190000e+00   0.0000000e+00   1.1100000e-01   9.5200000e-01   9.7900000e-01
   2.0880000e+00   6.0000000e+00   6.6324540e+03   1.3590920e+03   6.8235330e+03   2.5066000e+01   2.5066000e+01   6.2696400e+02   2.8800000e+02   5.7907300e+02   1.3170000e+00   9.9800000e-01   7.1810000e+00   1.0190000e+00   1.8861000e+01   2.8400000e-01   9.5200000e-01   9.7900000e-01
   3.1440000e+00   9.0000000e+00   8.3794150e+03   1.3867580e+03   7.1175170e+03   6.0355000e+01   6.0355000e+01   6.0174500e+02   2.8800000e+02   5.8654000e+02   1.3890000e+00   9.9800000e-01   7.5450000e+00   1.0200000e+00   1.2915000e+01   2.5600000e-01   9.5200000e-01   9.7900000e-01
   4.1610000e+00   1.2000000e+01   1.4724526e+04   1.5474660e+03   7.7960180e+03   1.1379800e+02   1.1379800e+02   6.5692400e+02   2.8800000e+02   6.1275100e+02   1.6570000e+00   9.9800000e-01   8.9730000e+00   1.0220000e+00   1.7900000e+01   3.5400000e-01   9.5200000e-01   9.7900000e-01
   5.1400000e+00   1.5000000e+01   2.1636573e+04   1.9243180e+03   8.4964760e+03   1.7527800e+02   1.7527800e+02   7.2642100e+02   2.8800000e+02   6.4439600e+02   2.0780000e+00   9.9800000e-01   1.1154000e+01   1.0260000e+00   2.6098000e+01   5.1700000e-01   9.5200000e-01   9.7900000e-01
   6.1750000e+00   1.8000000e+01   2.9793306e+04   2.3073680e+03   8.8303020e+03   2.4629600e+02   2.4629600e+02   7.9483600e+02   2.8800000e+02   6.7499500e+02   2.5010000e+00   9.9800000e-01   1.3305000e+01   1.0300000e+00   3.5415000e+01   7.0100000e-01   9.5200000e-01   9.7900000e-01
   7.1480000e+00   2.1000000e+01   3.8981809e+04   2.6780890e+03   9.1334170e+03   3.3217600e+02   3.3217600e+02   8.4920700e+02   2.8800000e+02   6.9861200e+02   2.9620000e+00   9.9800000e-01   1.5616000e+01   1.0350000e+00   4.5483000e+01   9.0100000e-01   9.5200000e-01   9.7900000e-01
   8.2060000e+00   2.4000000e+01   5.0997711e+04   3.0876160e+03   9.3188040e+03   4.3810800e+02   4.3810800e+02   9.4658100e+02   2.8800000e+02   7.4046000e+02   3.5740000e+00   9.9800000e-01   1.8553000e+01   1.0410000e+00   6.1972000e+01   1.2270000e+00   9.5200000e-01   9.7900000e-01
   9.3000000e+00   2.7000000e+01   7.2766238e+04   3.5604030e+03   9.7793130e+03   6.4492800e+02   6.4492800e+02   1.1098250e+03   2.8800000e+02   7.8777600e+02   4.4950000e+00   9.9800000e-01   2.2714000e+01   1.0490000e+00   9.1970000e+01   1.8210000e+00   9.5200000e-01   9.7900000e-01
   1.1380000e+00   3.0000000e+00   1.9624230e+03   1.4051290e+03   6.7243010e+03   1.0829000e+01   1.0829000e+01   5.0759800e+02   2.8800000e+02   5.5943600e+02   1.1680000e+00   9.9800000e-01   6.3160000e+00   1.0190000e+00   0.0000000e+00   1.2700000e-01   9.5200000e-01   9.8000000e-01
   2.0880000e+00   6.0000000e+00   6.6095460e+03   1.3587460e+03   6.8258390e+03   2.5000000e+01   2.5000000e+01   6.2561900e+02   2.8800000e+02   5.7886400e+02   1.3160000e+00   9.9800000e-01   7.1710000e+00   1.0190000e+00   1.9159000e+01   2.8300000e-01   9.5200000e-01   9.8000000e-01
   3.1440000e+00   9.0000000e+00   8.3795430e+03   1.3867590e+03   7.1201050e+03   6.0364000e+01   6.0364000e+01   6.0092000e+02   2.8800000e+02   5.8639100e+02   1.3890000e+00   9.9800000e-01   7.5380000e+00   1.0200000e+00   1.2881000e+01   2.5500000e-01   9.5200000e-01   9.8000000e-01
   4.1610000e+00   1.2000000e+01   1.4724522e+04   1.5474670e+03   7.7980250e+03   1.1379000e+02   1.1379000e+02   6.5602900e+02   2.8800000e+02   6.1258800e+02   1.6570000e+00   9.9800000e-01   8.9640000e+00   1.0220000e+00   1.7857000e+01   3.5300000e-01   9.5200000e-01   9.8000000e-01
   5.1400000e+00   1.5000000e+01   2.1636889e+04   1.9243190e+03   8.4973930e+03   1.7529700e+02   1.7529700e+02   7.2543300e+02   2.8800000e+02   6.4421300e+02   2.0780000e+00   9.9800000e-01   1.1142000e+01   1.0260000e+00   2.6042000e+01   5.1500000e-01   9.5200000e-01   9.8000000e-01
   6.1750000e+00   1.8000000e+01   2.9793772e+04   2.3073640e+03   8.8313470e+03   2.4628900e+02   2.4628900e+02   7.9371500e+02   2.8800000e+02   6.7477100e+02   2.5000000e+00   9.9800000e-01   1.3291000e+01   1.0300000e+00   3.5342000e+01   7.0000000e-01   9.5200000e-01   9.8000000e-01
   7.1480000e+00   2.1000000e+01   3.8981403e+04   2.6780880e+03   9.1339170e+03   3.3218900e+02   3.3218900e+02   8.4817200e+02   2.8800000e+02   6.9843800e+02   2.9620000e+00   9.9800000e-01   1.5599000e+01   1.0350000e+00   4.5401000e+01   8.9900000e-01   9.5200000e-01   9.8000000e-01
   8.2060000e+00   2.4000000e+01   5.0997826e+04   3.0876250e+03   9.3191690e+03   4.3814900e+02   4.3814900e+02   9.4554300e+02   2.8800000e+02   7.4029600e+02   3.5730000e+00   9.9800000e-01   1.8532000e+01   1.0410000e+00   6.1875000e+01   1.2250000e+00   9.5200000e-01   9.8000000e-01
   9.3000000e+00   2.7000000e+01   7.2766500e+04   3.5604120e+03   9.7800880e+03   6.4474200e+02   6.4474200e+02   1.1089270e+03   2.8800000e+02   7.8763400e+02   4.4940000e+00   9.9800000e-01   2.2687000e+01   1.0490000e+00   9.1864000e+01   1.8180000e+00   9.5200000e-01   9.8000000e-01
   1.1380000e+00   3.0000000e+00   2.2121060e+03   1.4095990e+03   6.7299730e+03   1.1098000e+01   1.1098000e+01   5.1459900e+02   2.8800000e+02   5.6067500e+02   1.1780000e+00   9.9800000e-01   6.3670000e+00   1.0190000e+00   0.0000000e+00   1.3500000e-01   9.5200000e-01   9.8100000e-01
   2.0880000e+00   6.0000000e+00   6.4133930e+03   1.3555240e+03   6.8264420e+03   2.4417000e+01   2.4417000e+01   6.2037200e+02   2.8800000e+02   5.7793700e+02   1.3090000e+00   9.9800000e-01   7.1280000e+00   1.0190000e+00   2.0421000e+01   2.7800000e-01   9.5200000e-01   9.8100000e-01
   3.1440000e+00   9.0000000e+00   8.3795910e+03   1.3867600e+03   7.1226880e+03   6.0358000e+01   6.0358000e+01   6.0009700e+02   2.8800000e+02   5.8624100e+02   1.3880000e+00   9.9800000e-01   7.5310000e+00   1.0200000e+00   1.2847000e+01   2.5400000e-01   9.5200000e-01   9.8100000e-01
   4.1610000e+00   1.2000000e+01   1.4724636e+04   1.5474680e+03   7.8000430e+03   1.1378800e+02   1.1378800e+02   6.5513800e+02   2.8800000e+02   6.1242600e+02   1.6570000e+00   9.9800000e-01   8.9540000e+00   1.0220000e+00   1.7815000e+01   3.5300000e-01   9.5200000e-01   9.8100000e-01
   5.1400000e+00   1.5000000e+01   2.1637133e+04   1.9243210e+03   8.4983090e+03   1.7528100e+02   1.7528100e+02   7.2444700e+02   2.8800000e+02   6.4403000e+02   2.0770000e+00   9.9800000e-01   1.1131000e+01   1.0260000e+00   2.5985000e+01   5.1400000e-01   9.5200000e-01   9.8100000e-01
   6.1750000e+00   1.8000000e+01   2.9794012e+04   2.3073500e+03   8.8323790e+03   2.4631200e+02   2.4631200e+02   7.9259700e+02   2.8800000e+02   6.7454700e+02   2.5000000e+00   9.9800000e-01   1.3277000e+01   1.0300000e+00   3.5269000e+01   6.9800000e-01   9.5200000e-01   9.8100000e-01
   7.1480000e+00   2.1000000e+01   3.8981054e+04   2.6780890e+03   9.1344170e+03   3.3219500e+02   3.3219500e+02   8.4714200e+02   2.8800000e+02   6.9826500e+02   2.9610000e+00   9.9800000e-01   1.5582000e+01   1.0350000e+00   4.5320000e+01   8.9700000e-01   9.5200000e-01   9.8100000e-01
   8.2060000e+00   2.4000000e+01   5.0997874e+04   3.0876300e+03   9.3195330e+03   4.3799300e+02   4.3799300e+02   9.4450700e+02   2.8800000e+02   7.4013400e+02   3.5720000e+00   9.9800000e-01   1.8511000e+01   1.0410000e+00   6.1778000e+01   1.2230000e+00   9.5200000e-01   9.8100000e-01
   9.3000000e+00   2.7000000e+01   7.2767398e+04   3.5604170e+03   9.7808680e+03   6.4503600e+02   6.4503600e+02   1.1080340e+03   2.8800000e+02   7.8749300e+02   4.4930000e+00   9.9800000e-01   2.2660000e+01   1.0490000e+00   9.1758000e+01   1.8160000e+00   9.5200000e-01   9.8100000e-01
   1.1380000e+00   3.0000000e+00   2.8525860e+03   1.4159290e+03   6.7372770e+03   1.1495000e+01   1.1495000e+01   5.3372100e+02   2.8800000e+02   5.6390800e+02   1.2030000e+00   9.9800000e-01   6.5020000e+00   1.0190000e+00   0.0000000e+00   1.5800000e-01   9.5200000e-01   9.8200000e-01
   2.0880000e+00   6.0000000e+00   6.4417150e+03   1.3560650e+03   6.8292900e+03   2.4516000e+01   2.4516000e+01   6.2005100e+02   2.8800000e+02   5.7785500e+02   1.3100000e+00   9.9800000e-01   7.1240000e+00   1.0190000e+00   1.9883000e+01   2.7700000e-01   9.5200000e-01   9.8200000e-01
   3.1440000e+00   9.0000000e+00   8.3796550e+03   1.3867600e+03   7.1252720e+03   6.0353000e+01   6.0353000e+01   5.9927600e+02   2.8800000e+02   5.8609100e+02   1.3880000e+00   9.9800000e-01   7.5230000e+00   1.0200000e+00   1.2813000e+01   2.5400000e-01   9.5200000e-01   9.8200000e-01
   4.1610000e+00   1.2000000e+01   1.4724729e+04   1.5474680e+03   7.8020600e+03   1.1379000e+02   1.1379000e+02   6.5424800e+02   2.8800000e+02   6.1226400e+02   1.6560000e+00   9.9800000e-01   8.9450000e+00   1.0220000e+00   1.7772000e+01   3.5200000e-01   9.5200000e-01   9.8200000e-01
   5.1400000e+00   1.5000000e+01   2.1636975e+04   1.9243240e+03   8.4992130e+03   1.7532400e+02   1.7532400e+02   7.2346100e+02   2.8800000e+02   6.4384600e+02   2.0770000e+00   9.9800000e-01   1.1119000e+01   1.0260000e+00   2.5929000e+01   5.1300000e-01   9.5200000e-01   9.8200000e-01
   6.1750000e+00   1.8000000e+01   2.9794356e+04   2.3073380e+03   8.8334150e+03   2.4626300e+02   2.4626300e+02   7.9148200e+02   2.8800000e+02   6.7432300e+02   2.5000000e+00   9.9800000e-01   1.3263000e+01   1.0300000e+00   3.5196000e+01   6.9700000e-01   9.5200000e-01   9.8200000e-01
   7.1480000e+00   2.1000000e+01   3.8980665e+04   2.6780880e+03   9.1349160e+03   3.3214900e+02   3.3214900e+02   8.4611300e+02   2.8800000e+02   6.9809300e+02   2.9600000e+00   9.9800000e-01   1.5565000e+01   1.0350000e+00   4.5240000e+01   8.9600000e-01   9.5200000e-01   9.8200000e-01
   8.2060000e+00   2.4000000e+01   5.0997840e+04   3.0876310e+03   9.3198940e+03   4.3800000e+02   4.3800000e+02   9.4347400e+02   2.8800000e+02   7.3997100e+02   3.5710000e+00   9.9800000e-01   1.8489000e+01   1.0410000e+00   6.1682000e+01   1.2210000e+00   9.5200000e-01   9.8200000e-01
   9.3000000e+00   2.7000000e+01   7.2767837e+04   3.5604170e+03   9.7816360e+03   6.4485400e+02   6.4485400e+02   1.1071410e+03   2.8800000e+02   7.8735200e+02   4.4920000e+00   9.9800000e-01   2.2632000e+01   1.0490000e+00   9.1652000e+01   1.8140000e+00   9.5200000e-01   9.8200000e-01
   1.1380000e+00   3.0000000e+00   3.5815920e+03   1.4185350e+03   6.7420420e+03   1.1667000e+01   1.1667000e+01   5.5524700e+02   2.8800000e+02   5.6719100e+02   1.2290000e+00   9.9800000e-01   6.6420000e+00   1.0190000e+00   0.0000000e+00   1.8300000e-01   9.5200000e-01   9.8300000e-01
   2.0880000e+00   6.0000000e+00   6.2242900e+03   1.3532460e+03   6.8300820e+03   2.3991000e+01   2.3991000e+01   6.1423500e+02   2.8800000e+02   5.7689400e+02   1.3030000e+00   9.9800000e-01   7.0790000e+00   1.0190000e+00   2.1196000e+01   2.7100000e-01   9.5200000e-01   9.8300000e-01
   3.1440000e+00   9.0000000e+00   8.3798150e+03   1.3867610e+03   7.1278640e+03   6.0362000e+01   6.0362000e+01   5.9845700e+02   2.8800000e+02   5.8594200e+02   1.3880000e+00   9.9800000e-01   7.5160000e+00   1.0200000e+00   1.2779000e+01   2.5300000e-01   9.5200000e-01   9.8300000e-01
   4.1610000e+00   1.2000000e+01   1.4724815e+04   1.5474690e+03   7.8040790e+03   1.1380200e+02   1.1380200e+02   6.5336000e+02   2.8800000e+02   6.1210200e+02   1.6560000e+00   9.9800000e-01   8.9360000e+00   1.0220000e+00   1.7730000e+01   3.5100000e-01   9.5200000e-01   9.8300000e-01
   5.1400000e+00   1.5000000e+01   2.1637236e+04   1.9243260e+03   8.5001300e+03   1.7532500e+02   1.7532500e+02   7.2248000e+02   2.8800000e+02   6.4366400e+02   2.0770000e+00   9.9800000e-01   1.1108000e+01   1.0260000e+00   2.5873000e+01   5.1200000e-01   9.5200000e-01   9.8300000e-01
   6.1750000e+00   1.8000000e+01   2.9794631e+04   2.3073250e+03   8.8344480e+03   2.4631200e+02   2.4631200e+02   7.9037100e+02   2.8800000e+02   6.7410100e+02   2.4990000e+00   9.9800000e-01   1.3249000e+01   1.0300000e+00   3.5123000e+01   6.9500000e-01   9.5200000e-01   9.8300000e-01
   7.1480000e+00   2.1000000e+01   3.8980045e+04   2.6780850e+03   9.1354240e+03   3.3219000e+02   3.3219000e+02   8.4507700e+02   2.8800000e+02   6.9792100e+02   2.9600000e+00   9.9800000e-01   1.5548000e+01   1.0350000e+00   4.5158000e+01   8.9400000e-01   9.5200000e-01   9.8300000e-01
   8.2060000e+00   2.4000000e+01   5.0997746e+04   3.0876290e+03   9.3202530e+03   4.3799400e+02   4.3799400e+02   9.4244400e+02   2.8800000e+02   7.3980900e+02   3.5710000e+00   9.9800000e-01   1.8468000e+01   1.0410000e+00   6.1585000e+01   1.2190000e+00   9.5200000e-01   9.8300000e-01
   9.3000000e+00   2.7000000e+01   7.2768956e+04   3.5604200e+03   9.7824100e+03   6.4476700e+02   6.4476700e+02   1.1062550e+03   2.8800000e+02   7.8721300e+02   4.4900000e+00   9.9800000e-01   2.2605000e+01   1.0490000e+00   9.1547000e+01   1.8120000e+00   9.5200000e-01   9.8300000e-01
   1.1380000e+00   3.0000000e+00   4.4518170e+03   1.4164580e+03   6.7437870e+03   1.1552000e+01   1.1552000e+01   5.8078200e+02   2.8800000e+02   5.7086000e+02   1.2580000e+00   9.9800000e-01   6.8030000e+00   1.0190000e+00   0.0000000e+00   2.1300000e-01   9.5200000e-01   9.8400000e-01
   2.0880000e+00   6.0000000e+00   6.1024420e+03   1.3516550e+03   6.8316870e+03   2.3708000e+01   2.3708000e+01   6.1064300e+02   2.8800000e+02   5.7632200e+02   1.2990000e+00   9.9800000e-01   7.0530000e+00   1.0190000e+00   2.1991000e+01   2.6800000e-01   9.5200000e-01   9.8400000e-01
   3.1440000e+00   9.0000000e+00   8.3799040e+03   1.3867610e+03   7.1304520e+03   6.0362000e+01   6.0362000e+01   5.9763900e+02   2.8800000e+02   5.8579300e+02   1.3880000e+00   9.9800000e-01   7.5090000e+00   1.0200000e+00   1.2745000e+01   2.5200000e-01   9.5200000e-01   9.8400000e-01
   4.1610000e+00   1.2000000e+01   1.4724896e+04   1.5474700e+03   7.8061000e+03   1.1379400e+02   1.1379400e+02   6.5247500e+02   2.8800000e+02   6.1194100e+02   1.6560000e+00   9.9800000e-01   8.9270000e+00   1.0220000e+00   1.7687000e+01   3.5000000e-01   9.5200000e-01   9.8400000e-01
   5.1400000e+00   1.5000000e+01   2.1637406e+04   1.9243280e+03   8.5010440e+03   1.7529500e+02   1.7529500e+02   7.2150100e+02   2.8800000e+02   6.4348200e+02   2.0760000e+00   9.9800000e-01   1.1097000e+01   1.0260000e+00   2.5817000e+01   5.1100000e-01   9.5200000e-01   9.8400000e-01
   6.1750000e+00   1.8000000e+01   2.9794934e+04   2.3073140e+03   8.8354830e+03   2.4628900e+02   2.4628900e+02   7.8926300e+02   2.8800000e+02   6.7387900e+02   2.4990000e+00   9.9800000e-01   1.3236000e+01   1.0300000e+00   3.5051000e+01   6.9400000e-01   9.5200000e-01   9.8400000e-01
   7.1480000e+00   2.1000000e+01   3.8979511e+04   2.6780800e+03   9.1359330e+03   3.3215200e+02   3.3215200e+02   8.4404200e+02   2.8800000e+02   6.9775100e+02   2.9590000e+00   9.9800000e-01   1.5531000e+01   1.0350000e+00   4.5077000e+01   8.9200000e-01   9.5200000e-01   9.8400000e-01
   8.2060000e+00   2.4000000e+01   5.0997633e+04   3.0876260e+03   9.3206120e+03   4.3807100e+02   4.3807100e+02   9.4141700e+02   2.8800000e+02   7.3964800e+02   3.5700000e+00   9.9800000e-01   1.8447000e+01   1.0410000e+00   6.1489000e+01   1.2170000e+00   9.5200000e-01   9.8400000e-01
   9.3000000e+00   2.7000000e+01   7.2769110e+04   3.5604280e+03   9.7831670e+03   6.4477300e+02   6.4477300e+02   1.1053650e+03   2.8800000e+02   7.8707400e+02   4.4890000e+00   9.9800000e-01   2.2578000e+01   1.0490000e+00   9.1441000e+01   1.8100000e+00   9.5200000e-01   9.8400000e-01
   1.1380000e+00   3.0000000e+00   5.6677290e+03   1.4053540e+03   6.7398800e+03   1.0889000e+01   1.0889000e+01   6.1490900e+02   2.8800000e+02   5.7543000e+02   1.2950000e+00   9.9800000e-01   7.0090000e+00   1.0190000e+00   0.0000000e+00   2.5500000e-01   9.5200000e-01   9.8500000e-01
   2.0880000e+00   6.0000000e+00   6.0510550e+03   1.3512560e+03   6.8339790e+03   2.3631000e+01   2.3631000e+01   6.0852000e+02   2.8800000e+02   5.7595100e+02   1.2970000e+00   9.9800000e-01   7.0360000e+00   1.0190000e+00   2.1978000e+01   2.6600000e-01   9.5200000e-01   9.8500000e-01
   3.1440000e+00   9.0000000e+00   8.3800110e+03   1.3867620e+03   7.1330420e+03   6.0359000e+01   6.0359000e+01   5.9682300e+02   2.8800000e+02   5.8564400e+02   1.3880000e+00   9.9800000e-01   7.5020000e+00   1.0200000e+00   1.2712000e+01   2.5200000e-01   9.5200000e-01   9.8500000e-01
   4.1610000e+00   1.2000000e+01   1.4724927e+04   1.5474700e+03   7.8081180e+03   1.1380600e+02   1.1380600e+02   6.5159100e+02   2.8800000e+02   6.1177900e+02   1.6560000e+00   9.9800000e-01   8.9180000e+00   1.0220000e+00   1.7645000e+01   3.4900000e-01   9.5200000e-01   9.8500000e-01
   5.1400000e+00   1.5000000e+01   2.1637516e+04   1.9243300e+03   8.5019570e+03   1.7532100e+02   1.7532100e+02   7.2052400e+02   2.8800000e+02   6.4330000e+02   2.0760000e+00   9.9800000e-01   1.1085000e+01   1.0260000e+00   2.5761000e+01   5.1000000e-01   9.5200000e-01   9.8500000e-01
   6.1750000e+00   1.8000000e+01   2.9795275e+04   2.3073060e+03   8.8365190e+03   2.4625800e+02   2.4625800e+02   7.8815900e+02   2.8800000e+02   6.7365700e+02   2.4990000e+00   9.9800000e-01   1.3222000e+01   1.0300000e+00   3.4979000e+01   6.9300000e-01   9.5200000e-01   9.8500000e-01
   7.1480000e+00   2.1000000e+01   3.8979140e+04   2.6780790e+03   9.1364400e+03   3.3216500e+02   3.3216500e+02   8.4300900e+02   2.8800000e+02   6.9758100e+02   2.9590000e+00   9.9800000e-01   1.5514000e+01   1.0350000e+00   4.4996000e+01   8.9100000e-01   9.5200000e-01   9.8500000e-01
   8.2060000e+00   2.4000000e+01   5.0997542e+04   3.0876240e+03   9.3209700e+03   4.3803300e+02   4.3803300e+02   9.4039300e+02   2.8800000e+02   7.3948700e+02   3.5690000e+00   9.9800000e-01   1.8425000e+01   1.0410000e+00   6.1393000e+01   1.2150000e+00   9.5200000e-01   9.8500000e-01
   9.3000000e+00   2.7000000e+01   7.2771070e+04   3.5604210e+03   9.7839430e+03   6.4477900e+02   6.4477900e+02   1.1044880e+03   2.8800000e+02   7.8693700e+02   4.4880000e+00   9.9800000e-01   2.2551000e+01   1.0490000e+00   9.1337000e+01   1.8080000e+00   9.5200000e-01   9.8500000e-01
   1.1380000e+00   3.0000000e+00   6.1565070e+03   1.3990050e+03   6.7386400e+03   1.0507000e+01   1.0507000e+01   6.2804800e+02   2.8800000e+02   5.7697600e+02   1.3080000e+00   9.9800000e-01   7.0810000e+00   1.0190000e+00   0.0000000e+00   2.7100000e-01   9.5200000e-01   9.8600000e-01
   2.0880000e+00   6.0000000e+00   5.8985550e+03   1.3500100e+03   6.8357470e+03   2.3403000e+01   2.3403000e+01   6.0390300e+02   2.8800000e+02   5.7519800e+02   1.2920000e+00   9.9800000e-01   7.0010000e+00   1.0190000e+00   2.2264000e+01   2.6100000e-01   9.5200000e-01   9.8600000e-01
   3.1440000e+00   9.0000000e+00   8.3801880e+03   1.3867620e+03   7.1356370e+03   6.0371000e+01   6.0371000e+01   5.9600900e+02   2.8800000e+02   5.8549500e+02   1.3880000e+00   9.9800000e-01   7.4940000e+00   1.0200000e+00   1.2678000e+01   2.5100000e-01   9.5200000e-01   9.8600000e-01
   4.1610000e+00   1.2000000e+01   1.4725021e+04   1.5474710e+03   7.8101430e+03   1.1380100e+02   1.1380100e+02   6.5071000e+02   2.8800000e+02   6.1161900e+02   1.6560000e+00   9.9800000e-01   8.9090000e+00   1.0220000e+00   1.7603000e+01   3.4800000e-01   9.5200000e-01   9.8600000e-01
   5.1400000e+00   1.5000000e+01   2.1637686e+04   1.9243320e+03   8.5028720e+03   1.7529800e+02   1.7529800e+02   7.1955000e+02   2.8800000e+02   6.4311900e+02   2.0760000e+00   9.9800000e-01   1.1074000e+01   1.0260000e+00   2.5705000e+01   5.0900000e-01   9.5200000e-01   9.8600000e-01
   6.1750000e+00   1.8000000e+01   2.9795476e+04   2.3072920e+03   8.8375470e+03   2.4629400e+02   2.4629400e+02   7.8705800e+02   2.8800000e+02   6.7343600e+02   2.4980000e+00   9.9800000e-01   1.3208000e+01   1.0300000e+00   3.4907000e+01   6.9100000e-01   9.5200000e-01   9.8600000e-01
   7.1480000e+00   2.1000000e+01   3.8978756e+04   2.6780780e+03   9.1369480e+03   3.3204000e+02   3.3204000e+02   8.4197900e+02   2.8800000e+02   6.9741100e+02   2.9580000e+00   9.9800000e-01   1.5497000e+01   1.0350000e+00   4.4916000e+01   8.8900000e-01   9.5200000e-01   9.8600000e-01
   8.2060000e+00   2.4000000e+01   5.0997437e+04   3.0876220e+03   9.3213280e+03   4.3813100e+02   4.3813100e+02   9.3937200e+02   2.8800000e+02   7.3932700e+02   3.5680000e+00   9.9800000e-01   1.8404000e+01   1.0410000e+00   6.1297000e+01   1.2140000e+00   9.5200000e-01   9.8600000e-01
   9.3000000e+00   2.7000000e+01   7.2771590e+04   3.5604250e+03   9.7846970e+03   6.4512400e+02   6.4512400e+02   1.1036060e+03   2.8800000e+02   7.8680000e+02   4.4870000e+00   9.9800000e-01   2.2524000e+01   1.0490000e+00   9.1233000e+01   1.8060000e+00   9.5200000e-01   9.8600000e-01
   1.1380000e+00   3.0000000e+00   7.4016890e+03   1.3706480e+03   6.7240020e+03   8.8380000e+00   8.8380000e+00   6.6766700e+02   2.8800000e+02   5.8049500e+02   1.3350000e+00   9.9800000e-01   7.2460000e+00   1.0190000e+00   7.3840000e+00   3.2600000e-01   9.5200000e-01   9.8700000e-01
   2.0880000e+00   6.0000000e+00   5.7191080e+03   1.3486250e+03   6.8374730e+03   2.3158000e+01   2.3158000e+01   5.9868400e+02   2.8800000e+02   5.7436600e+02   1.2870000e+00   9.9800000e-01   6.9630000e+00   1.0190000e+00   2.2711000e+01   2.5500000e-01   9.5200000e-01   9.8700000e-01
   3.1440000e+00   9.0000000e+00   8.3802270e+03   1.3867630e+03   7.1382240e+03   6.0360000e+01   6.0360000e+01   5.9519600e+02   2.8800000e+02   5.8534600e+02   1.3880000e+00   9.9800000e-01   7.4870000e+00   1.0200000e+00   1.2644000e+01   2.5000000e-01   9.5200000e-01   9.8700000e-01
   4.1610000e+00   1.2000000e+01   1.4725200e+04   1.5474710e+03   7.8121770e+03   1.1380500e+02   1.1380500e+02   6.4983200e+02   2.8800000e+02   6.1145800e+02   1.6550000e+00   9.9800000e-01   8.9000000e+00   1.0220000e+00   1.7561000e+01   3.4800000e-01   9.5200000e-01   9.8700000e-01
   5.1400000e+00   1.5000000e+01   2.1638171e+04   1.9243320e+03   8.5037960e+03   1.7533000e+02   1.7533000e+02   7.1858100e+02   2.8800000e+02   6.4293900e+02   2.0760000e+00   9.9800000e-01   1.1063000e+01   1.0260000e+00   2.5650000e+01   5.0800000e-01   9.5200000e-01   9.8700000e-01
   6.1750000e+00   1.8000000e+01   2.9795822e+04   2.3072840e+03   8.8385830e+03   2.4631800e+02   2.4631800e+02   7.8596000e+02   2.8800000e+02   6.7321600e+02   2.4980000e+00   9.9800000e-01   1.3195000e+01   1.0300000e+00   3.4835000e+01   6.9000000e-01   9.5200000e-01   9.8700000e-01
   7.1480000e+00   2.1000000e+01   3.8978447e+04   2.6780770e+03   9.1374550e+03   3.3204900e+02   3.3204900e+02   8.4095200e+02   2.8800000e+02   6.9724200e+02   2.9570000e+00   9.9800000e-01   1.5480000e+01   1.0350000e+00   4.4835000e+01   8.8800000e-01   9.5200000e-01   9.8700000e-01
   8.2060000e+00   2.4000000e+01   5.0997285e+04   3.0876220e+03   9.3216840e+03   4.3808900e+02   4.3808900e+02   9.3835400e+02   2.8800000e+02   7.3916800e+02   3.5670000e+00   9.9800000e-01   1.8383000e+01   1.0410000e+00   6.1202000e+01   1.2120000e+00   9.5200000e-01   9.8700000e-01
   9.3000000e+00   2.7000000e+01   7.2772233e+04   3.5604260e+03   9.7854470e+03   6.4484500e+02   6.4484500e+02   1.1027260e+03   2.8800000e+02   7.8666400e+02   4.4850000e+00   9.9800000e-01   2.2497000e+01   1.0490000e+00   9.1128000e+01   1.8040000e+00   9.5200000e-01   9.8700000e-01
   1.1380000e+00   3.0000000e+00   7.4044180e+03   1.3531720e+03   6.7154860e+03   7.8320000e+00   7.8320000e+00   6.7129700e+02   2.8800000e+02   5.7995400e+02   1.3300000e+00   9.9800000e-01   7.2200000e+00   1.0190000e+00   1.6470000e+01   3.3600000e-01   9.5200000e-01   9.8800000e-01
   2.0880000e+00   6.0000000e+00   5.3647950e+03   1.3463970e+03   6.8386100e+03   2.2743000e+01   2.2743000e+01   5.8900000e+02   2.8800000e+02   5.7287100e+02   1.2750000e+00   9.9800000e-01   6.8960000e+00   1.0190000e+00   2.3463000e+01   2.4400000e-01   9.5200000e-01   9.8800000e-01
   3.1440000e+00   9.0000000e+00   8.3802710e+03   1.3867640e+03   7.1408110e+03   6.0361000e+01   6.0361000e+01   5.9438400e+02   2.8800000e+02   5.8519700e+02   1.3880000e+00   9.9800000e-01   7.4800000e+00   1.0200000e+00   1.2610000e+01   2.5000000e-01   9.5200000e-01   9.8800000e-01
   4.1610000e+00   1.2000000e+01   1.4725155e+04   1.5474720e+03   7.8141930e+03   1.1380900e+02   1.1380900e+02   6.4895500e+02   2.8800000e+02   6.1129800e+02   1.6550000e+00   9.9800000e-01   8.8910000e+00   1.0220000e+00   1.7518000e+01   3.4700000e-01   9.5200000e-01   9.8800000e-01
   5.1400000e+00   1.5000000e+01   2.1638241e+04   1.9243340e+03   8.5047080e+03   1.7534300e+02   1.7534300e+02   7.1761100e+02   2.8800000e+02   6.4275800e+02   2.0750000e+00   9.9800000e-01   1.1051000e+01   1.0260000e+00   2.5594000e+01   5.0700000e-01   9.5200000e-01   9.8800000e-01
   6.1750000e+00   1.8000000e+01   2.9796210e+04   2.3072800e+03   8.8396220e+03   2.4633700e+02   2.4633700e+02   7.8486600e+02   2.8800000e+02   6.7299700e+02   2.4980000e+00   9.9800000e-01   1.3181000e+01   1.0300000e+00   3.4764000e+01   6.8800000e-01   9.5200000e-01   9.8800000e-01
   7.1480000e+00   2.1000000e+01   3.8978048e+04   2.6780770e+03   9.1379620e+03   3.3205800e+02   3.3205800e+02   8.3992800e+02   2.8800000e+02   6.9707300e+02   2.9570000e+00   9.9800000e-01   1.5463000e+01   1.0350000e+00   4.4754000e+01   8.8600000e-01   9.5200000e-01   9.8800000e-01
   8.2060000e+00   2.4000000e+01   5.0997182e+04   3.0876190e+03   9.3220410e+03   4.3808500e+02   4.3808500e+02   9.3733900e+02   2.8800000e+02   7.3900900e+02   3.5660000e+00   9.9800000e-01   1.8362000e+01   1.0410000e+00   6.1107000e+01   1.2100000e+00   9.5200000e-01   9.8800000e-01
   9.3000000e+00   2.7000000e+01   7.2773113e+04   3.5604280e+03   9.7861980e+03   6.4511900e+02   6.4511900e+02   1.1018500e+03   2.8800000e+02   7.8652900e+02   4.4840000e+00   9.9800000e-01   2.2470000e+01   1.0490000e+00   9.1024000e+01   1.8020000e+00   9.5200000e-01   9.8800000e-01
   1.1380000e+00   3.0000000e+00   5.9159500e+03   1.3214710e+03   6.6970500e+03   6.0630000e+00   6.0630000e+00   6.3938800e+02   2.8800000e+02   5.7409900e+02   1.2800000e+00   9.9800000e-01   6.9470000e+00   1.0190000e+00   3.0392000e+01   3.0500000e-01   9.5200000e-01   9.8900000e-01
   2.0880000e+00   6.0000000e+00   5.4505570e+03   1.3469160e+03   6.8414340e+03   2.2840000e+01   2.2840000e+01   5.9026300e+02   2.8800000e+02   5.7300900e+02   1.2780000e+00   9.9800000e-01   6.9020000e+00   1.0190000e+00   2.3027000e+01   2.4600000e-01   9.5200000e-01   9.8900000e-01
   3.1440000e+00   9.0000000e+00   8.3804240e+03   1.3867640e+03   7.1434070e+03   6.0376000e+01   6.0376000e+01   5.9357500e+02   2.8800000e+02   5.8504900e+02   1.3870000e+00   9.9800000e-01   7.4730000e+00   1.0200000e+00   1.2577000e+01   2.4900000e-01   9.5200000e-01   9.8900000e-01
   4.1610000e+00   1.2000000e+01   1.4725298e+04   1.5474730e+03   7.8162270e+03   1.1378800e+02   1.1378800e+02   6.4808100e+02   2.8800000e+02   6.1113800e+02   1.6550000e+00   9.9800000e-01   8.8820000e+00   1.0220000e+00   1.7477000e+01   3.4600000e-01   9.5200000e-01   9.8900000e-01
   5.1400000e+00   1.5000000e+01   2.1638335e+04   1.9243360e+03   8.5056210e+03   1.7529800e+02   1.7529800e+02   7.1664400e+02   2.8800000e+02   6.4257800e+02   2.0750000e+00   9.9800000e-01   1.1040000e+01   1.0260000e+00   2.5538000e+01   5.0600000e-01   9.5200000e-01   9.8900000e-01
   6.1750000e+00   1.8000000e+01   2.9796411e+04   2.3072680e+03   8.8406500e+03   2.4630800e+02   2.4630800e+02   7.8377500e+02   2.8800000e+02   6.7277800e+02   2.4970000e+00   9.9800000e-01   1.3168000e+01   1.0300000e+00   3.4692000e+01   6.8700000e-01   9.5200000e-01   9.8900000e-01
   7.1480000e+00   2.1000000e+01   3.8977774e+04   2.6780750e+03   9.1384690e+03   3.3216200e+02   3.3216200e+02   8.3890600e+02   2.8800000e+02   6.9690500e+02   2.9560000e+00   9.9800000e-01   1.5446000e+01   1.0350000e+00   4.4674000e+01   8.8500000e-01   9.5200000e-01   9.8900000e-01
   8.2060000e+00   2.4000000e+01   5.0997083e+04   3.0876170e+03   9.3223970e+03   4.3813200e+02   4.3813200e+02   9.3632700e+02   2.8800000e+02   7.3885100e+02   3.5650000e+00   9.9800000e-01   1.8341000e+01   1.0410000e+00   6.1012000e+01   1.2080000e+00   9.5200000e-01   9.8900000e-01
   9.3000000e+00   2.7000000e+01   7.2773849e+04   3.5604280e+03   9.7869420e+03   6.4489600e+02   6.4489600e+02   1.1009760e+03   2.8800000e+02   7.8639400e+02   4.4830000e+00   9.9800000e-01   2.2443000e+01   1.0490000e+00   9.0920000e+01   1.8000000e+00   9.5200000e-01   9.8900000e-01
   1.1380000e+00   3.0000000e+00   5.2816620e+03   1.3157220e+03   6.6954130e+03   5.7460000e+00   5.7460000e+00   6.2319200e+02   2.8800000e+02   5.7152100e+02   1.2610000e+00   9.9800000e-01   6.8300000e+00   1.0190000e+00   3.2217000e+01   2.8800000e-01   9.5200000e-01   9.9000000e-01
   2.0880000e+00   6.0000000e+00   5.3412630e+03   1.3463390e+03   6.8436680e+03   2.2734000e+01   2.2734000e+01   5.8659300e+02   2.8800000e+02   5.7240100e+02   1.2740000e+00   9.9800000e-01   6.8750000e+00   1.0190000e+00   2.3042000e+01   2.4200000e-01   9.5200000e-01   9.9000000e-01
   3.1440000e+00   9.0000000e+00   8.3805340e+03   1.3867650e+03   7.1460010e+03   6.0367000e+01   6.0367000e+01   5.9276800e+02   2.8800000e+02   5.8490000e+02   1.3870000e+00   9.9800000e-01   7.4650000e+00   1.0200000e+00   1.2543000e+01   2.4800000e-01   9.5200000e-01   9.9000000e-01
   4.1610000e+00   1.2000000e+01   1.4725332e+04   1.5474740e+03   7.8182540e+03   1.1380400e+02   1.1380400e+02   6.4720800e+02   2.8800000e+02   6.1097800e+02   1.6550000e+00   9.9800000e-01   8.8740000e+00   1.0220000e+00   1.7435000e+01   3.4500000e-01   9.5200000e-01   9.9000000e-01
   5.1400000e+00   1.5000000e+01   2.1638535e+04   1.9243380e+03   8.5065380e+03   1.7530800e+02   1.7530800e+02   7.1568000e+02   2.8800000e+02   6.4239800e+02   2.0750000e+00   9.9800000e-01   1.1029000e+01   1.0260000e+00   2.5483000e+01   5.0400000e-01   9.5200000e-01   9.9000000e-01
   6.1750000e+00   1.8000000e+01   2.9796680e+04   2.3072600e+03   8.8416810e+03   2.4632200e+02   2.4632200e+02   7.8268800e+02   2.8800000e+02   6.7255900e+02   2.4970000e+00   9.9800000e-01   1.3154000e+01   1.0300000e+00   3.4621000e+01   6.8500000e-01   9.5200000e-01   9.9000000e-01
   7.1480000e+00   2.1000000e+01   3.8977415e+04   2.6780760e+03   9.1389750e+03   3.3216200e+02   3.3216200e+02   8.3788700e+02   2.8800000e+02   6.9673700e+02   2.9560000e+00   9.9800000e-01   1.5429000e+01   1.0350000e+00   4.4594000e+01   8.8300000e-01   9.5200000e-01   9.9000000e-01
   8.2060000e+00   2.4000000e+01   5.0996968e+04   3.0876150e+03   9.3227520e+03   4.3813200e+02   4.3813200e+02   9.3531800e+02   2.8800000e+02   7.3869400e+02   3.5640000e+00   9.9800000e-01   1.8320000e+01   1.0410000e+00   6.0917000e+01   1.2060000e+00   9.5200000e-01   9.9000000e-01
   9.3000000e+00   2.7000000e+01   7.2774135e+04   3.5604360e+03   9.7876770e+03   6.4479100e+02   6.4479100e+02   1.1001030e+03   2.8800000e+02   7.8626000e+02   4.4820000e+00   9.9800000e-01   2.2416000e+01   1.0490000e+00   9.0816000e+01   1.7980000e+00   9.5200000e-01   9.9000000e-01
   1.1380000e+00   3.0000000e+00   4.0479540e+03   1.3093810e+03   6.6927700e+03   5.3980000e+00   5.3980000e+00   5.9034700e+02   2.8800000e+02   5.6641200e+02   1.2220000e+00   9.9800000e-01   6.6060000e+00   1.0190000e+00   3.3253000e+01   2.5000000e-01   9.5200000e-01   9.9100000e-01
   2.0880000e+00   6.0000000e+00   5.1218080e+03   1.3456190e+03   6.8457830e+03   2.2604000e+01   2.2604000e+01   5.8005900e+02   2.8800000e+02   5.7140700e+02   1.2680000e+00   9.9800000e-01   6.8310000e+00   1.0190000e+00   2.3055000e+01   2.3400000e-01   9.5200000e-01   9.9100000e-01
   3.1440000e+00   9.0000000e+00   8.3806170e+03   1.3867650e+03   7.1485930e+03   6.0377000e+01   6.0377000e+01   5.9196200e+02   2.8800000e+02   5.8475200e+02   1.3870000e+00   9.9800000e-01   7.4580000e+00   1.0200000e+00   1.2510000e+01   2.4800000e-01   9.5200000e-01   9.9100000e-01
   4.1610000e+00   1.2000000e+01   1.4725438e+04   1.5474740e+03   7.8202890e+03   1.1381000e+02   1.1381000e+02   6.4633800e+02   2.8800000e+02   6.1081900e+02   1.6550000e+00   9.9800000e-01   8.8650000e+00   1.0220000e+00   1.7393000e+01   3.4400000e-01   9.5200000e-01   9.9100000e-01
   5.1400000e+00   1.5000000e+01   2.1638746e+04   1.9243400e+03   8.5074550e+03   1.7533400e+02   1.7533400e+02   7.1471900e+02   2.8800000e+02   6.4221900e+02   2.0750000e+00   9.9800000e-01   1.1018000e+01   1.0260000e+00   2.5428000e+01   5.0300000e-01   9.5200000e-01   9.9100000e-01
   6.1750000e+00   1.8000000e+01   2.9797024e+04   2.3072570e+03   8.8427190e+03   2.4629000e+02   2.4629000e+02   7.8160300e+02   2.8800000e+02   6.7234200e+02   2.4970000e+00   9.9800000e-01   1.3141000e+01   1.0300000e+00   3.4550000e+01   6.8400000e-01   9.5200000e-01   9.9100000e-01
   7.1480000e+00   2.1000000e+01   3.8977114e+04   2.6780760e+03   9.1394810e+03   3.3202500e+02   3.3202500e+02   8.3687200e+02   2.8800000e+02   6.9656900e+02   2.9550000e+00   9.9800000e-01   1.5412000e+01   1.0350000e+00   4.4514000e+01   8.8100000e-01   9.5200000e-01   9.9100000e-01
   8.2060000e+00   2.4000000e+01   5.0996852e+04   3.0876120e+03   9.3231070e+03   4.3798000e+02   4.3798000e+02   9.3431200e+02   2.8800000e+02   7.3853700e+02   3.5630000e+00   9.9800000e-01   1.8299000e+01   1.0410000e+00   6.0822000e+01   1.2040000e+00   9.5200000e-01   9.9100000e-01
   9.3000000e+00   2.7000000e+01   7.2774949e+04   3.5604380e+03   9.7884150e+03   6.4497900e+02   6.4497900e+02   1.0992340e+03   2.8800000e+02   7.8612700e+02   4.4810000e+00   9.9800000e-01   2.2390000e+01   1.0490000e+00   9.0712000e+01   1.7960000e+00   9.5200000e-01   9.9100000e-01
   1.1380000e+00   3.0000000e+00   2.3920750e+03   1.3087220e+03   6.6930630e+03   5.3500000e+00   5.3500000e+00   5.4161900e+02   2.8800000e+02   5.5906100e+02   1.1690000e+00   9.9800000e-01   6.2990000e+00   1.0190000e+00   3.1500000e+01   1.9300000e-01   9.5200000e-01   9.9200000e-01
   2.0880000e+00   6.0000000e+00   4.8749390e+03   1.3448730e+03   6.8478310e+03   2.2460000e+01   2.2460000e+01   5.7271700e+02   2.8800000e+02   5.7034600e+02   1.2600000e+00   9.9800000e-01   6.7840000e+00   1.0190000e+00   2.3265000e+01   2.2600000e-01   9.5200000e-01   9.9200000e-01
   3.1440000e+00   9.0000000e+00   8.3807580e+03   1.3867660e+03   7.1511900e+03   6.0380000e+01   6.0380000e+01   5.9115800e+02   2.8800000e+02   5.8460400e+02   1.3870000e+00   9.9800000e-01   7.4510000e+00   1.0200000e+00   1.2476000e+01   2.4700000e-01   9.5200000e-01   9.9200000e-01
   4.1610000e+00   1.2000000e+01   1.4725595e+04   1.5474750e+03   7.8223300e+03   1.1380900e+02   1.1380900e+02   6.4547000e+02   2.8800000e+02   6.1066000e+02   1.6540000e+00   9.9800000e-01   8.8560000e+00   1.0220000e+00   1.7351000e+01   3.4300000e-01   9.5200000e-01   9.9200000e-01
   5.1400000e+00   1.5000000e+01   2.1638782e+04   1.9243420e+03   8.5083680e+03   1.7533900e+02   1.7533900e+02   7.1375800e+02   2.8800000e+02   6.4204000e+02   2.0740000e+00   9.9800000e-01   1.1006000e+01   1.0260000e+00   2.5373000e+01   5.0200000e-01   9.5200000e-01   9.9200000e-01
   6.1750000e+00   1.8000000e+01   2.9797235e+04   2.3072480e+03   8.8437470e+03   2.4631500e+02   2.4631500e+02   7.8052200e+02   2.8800000e+02   6.7212500e+02   2.4960000e+00   9.9800000e-01   1.3127000e+01   1.0300000e+00   3.4479000e+01   6.8300000e-01   9.5200000e-01   9.9200000e-01
   7.1480000e+00   2.1000000e+01   3.8976811e+04   2.6780760e+03   9.1399870e+03   3.3202600e+02   3.3202600e+02   8.3585800e+02   2.8800000e+02   6.9640300e+02   2.9540000e+00   9.9800000e-01   1.5396000e+01   1.0350000e+00   4.4435000e+01   8.8000000e-01   9.5200000e-01   9.9200000e-01
   8.2060000e+00   2.4000000e+01   5.0996746e+04   3.0876100e+03   9.3234610e+03   4.3812300e+02   4.3812300e+02   9.3330900e+02   2.8800000e+02   7.3838000e+02   3.5630000e+00   9.9800000e-01   1.8278000e+01   1.0410000e+00   6.0728000e+01   1.2020000e+00   9.5200000e-01   9.9200000e-01
   9.3000000e+00   2.7000000e+01   7.2776226e+04   3.5604330e+03   9.7891540e+03   6.4511100e+02   6.4511100e+02   1.0983700e+03   2.8800000e+02   7.8599500e+02   4.4790000e+00   9.9800000e-01   2.2363000e+01   1.0490000e+00   9.0610000e+01   1.7940000e+00   9.5200000e-01   9.9200000e-01
   1.1380000e+00   3.0000000e+00   1.1297550e+03   1.3156590e+03   6.6982990e+03   5.7080000e+00   5.7080000e+00   4.9800800e+02   2.8800000e+02   5.5262100e+02   1.1250000e+00   9.9800000e-01   6.0430000e+00   1.0190000e+00   2.5168000e+01   1.3900000e-01   9.5200000e-01   9.9300000e-01
   2.0880000e+00   6.0000000e+00   4.7286410e+03   1.3447550e+03   6.8503130e+03   2.2444000e+01   2.2444000e+01   5.6803100e+02   2.8800000e+02   5.6954700e+02   1.2550000e+00   9.9800000e-01   6.7490000e+00   1.0190000e+00   2.3205000e+01   2.2000000e-01   9.5200000e-01   9.9300000e-01
   3.1440000e+00   9.0000000e+00   8.3808470e+03   1.3867670e+03   7.1537840e+03   6.0373000e+01   6.0373000e+01   5.9035500e+02   2.8800000e+02   5.8445600e+02   1.3870000e+00   9.9800000e-01   7.4440000e+00   1.0200000e+00   1.2443000e+01   2.4600000e-01   9.5200000e-01   9.9300000e-01
   4.1610000e+00   1.2000000e+01   1.4725660e+04   1.5474750e+03   7.8243640e+03   1.1381100e+02   1.1381100e+02   6.4460400e+02   2.8800000e+02   6.1050100e+02   1.6540000e+00   9.9800000e-01   8.8470000e+00   1.0220000e+00   1.7309000e+01   3.4300000e-01   9.5200000e-01   9.9300000e-01
   5.1400000e+00   1.5000000e+01   2.1639007e+04   1.9243430e+03   8.5092860e+03   1.7530300e+02   1.7530300e+02   7.1280200e+02   2.8800000e+02   6.4186100e+02   2.0740000e+00   9.9800000e-01   1.0995000e+01   1.0260000e+00   2.5318000e+01   5.0100000e-01   9.5200000e-01   9.9300000e-01
   6.1750000e+00   1.8000000e+01   2.9797598e+04   2.3072460e+03   8.8447850e+03   2.4628800e+02   2.4628800e+02   7.7944400e+02   2.8800000e+02   6.7190800e+02   2.4960000e+00   9.9800000e-01   1.3114000e+01   1.0300000e+00   3.4408000e+01   6.8100000e-01   9.5200000e-01   9.9300000e-01
   7.1480000e+00   2.1000000e+01   3.8976515e+04   2.6780760e+03   9.1404920e+03   3.3215000e+02   3.3215000e+02   8.3484800e+02   2.8800000e+02   6.9623600e+02   2.9540000e+00   9.9800000e-01   1.5379000e+01   1.0350000e+00   4.4355000e+01   8.7800000e-01   9.5200000e-01   9.9300000e-01
   8.2060000e+00   2.4000000e+01   5.0995932e+04   3.0875940e+03   9.3238350e+03   4.3797300e+02   4.3797300e+02   9.3228800e+02   2.8800000e+02   7.3822600e+02   3.5620000e+00   9.9800000e-01   1.8257000e+01   1.0410000e+00   6.0632000e+01   1.2000000e+00   9.5200000e-01   9.9300000e-01
   9.3000000e+00   2.7000000e+01   7.2776541e+04   3.5604380e+03   9.7898780e+03   6.4485400e+02   6.4485400e+02   1.0975030e+03   2.8800000e+02   7.8586300e+02   4.4780000e+00   9.9800000e-01   2.2336000e+01   1.0490000e+00   9.0507000e+01   1.7920000e+00   9.5200000e-01   9.9300000e-01
   1.1380000e+00   3.0000000e+00   3.0863400e+02   1.3326750e+03   6.7104500e+03   6.6220000e+00   6.6220000e+00   4.6013100e+02   2.8800000e+02   5.4756000e+02   1.0950000e+00   9.9800000e-01   5.8510000e+00   1.0190000e+00   1.4689000e+01   8.9000000e-02   9.5200000e-01   9.9400000e-01
   2.0880000e+00   6.0000000e+00   4.3650550e+03   1.3444430e+03   6.8525900e+03   2.2372000e+01   2.2372000e+01   5.5730800e+02   2.8800000e+02   5.6795500e+02   1.2440000e+00   9.9800000e-01   6.6800000e+00   1.0190000e+00   2.3020000e+01   2.0700000e-01   9.5200000e-01   9.9400000e-01
   3.1440000e+00   9.0000000e+00   8.3810130e+03   1.3867670e+03   7.1563840e+03   6.0383000e+01   6.0383000e+01   5.8955400e+02   2.8800000e+02   5.8430800e+02   1.3870000e+00   9.9800000e-01   7.4370000e+00   1.0200000e+00   1.2410000e+01   2.4600000e-01   9.5200000e-01   9.9400000e-01
   4.1610000e+00   1.2000000e+01   1.4725664e+04   1.5474760e+03   7.8263950e+03   1.1380400e+02   1.1380400e+02   6.4374000e+02   2.8800000e+02   6.1034200e+02   1.6540000e+00   9.9800000e-01   8.8380000e+00   1.0220000e+00   1.7268000e+01   3.4200000e-01   9.5200000e-01   9.9400000e-01
   5.1400000e+00   1.5000000e+01   2.1639118e+04   1.9243450e+03   8.5102010e+03   1.7530400e+02   1.7530400e+02   7.1184700e+02   2.8800000e+02   6.4168300e+02   2.0740000e+00   9.9800000e-01   1.0984000e+01   1.0260000e+00   2.5263000e+01   5.0000000e-01   9.5200000e-01   9.9400000e-01
   6.1750000e+00   1.8000000e+01   2.9797711e+04   2.3072340e+03   8.8458080e+03   2.4632000e+02   2.4632000e+02   7.7837000e+02   2.8800000e+02   6.7169200e+02   2.4950000e+00   9.9800000e-01   1.3100000e+01   1.0300000e+00   3.4338000e+01   6.8000000e-01   9.5200000e-01   9.9400000e-01
   7.1480000e+00   2.1000000e+01   3.8976215e+04   2.6780750e+03   9.1409970e+03   3.3210100e+02   3.3210100e+02   8.3384000e+02   2.8800000e+02   6.9607000e+02   2.9530000e+00   9.9800000e-01   1.5362000e+01   1.0350000e+00   4.4276000e+01   8.7700000e-01   9.5200000e-01   9.9400000e-01
   8.2060000e+00   2.4000000e+01   5.0995368e+04   3.0875760e+03   9.3242290e+03   4.3804800e+02   4.3804800e+02   9.3126600e+02   2.8800000e+02   7.3807300e+02   3.5610000e+00   9.9800000e-01   1.8237000e+01   1.0410000e+00   6.0536000e+01   1.1980000e+00   9.5200000e-01   9.9400000e-01
   9.3000000e+00   2.7000000e+01   7.2777528e+04   3.5604370e+03   9.7906060e+03   6.4481300e+02   6.4481300e+02   1.0966420e+03   2.8800000e+02   7.8573200e+02   4.4770000e+00   9.9800000e-01   2.2310000e+01   1.0490000e+00   9.0404000e+01   1.7900000e+00   9.5200000e-01   9.9400000e-01
   1.1380000e+00   3.0000000e+00   2.5354700e+02   1.3396350e+03   6.7173520e+03   7.0000000e+00   7.0000000e+00   4.5357000e+02   2.8800000e+02   5.4704800e+02   1.0930000e+00   9.9800000e-01   5.8320000e+00   1.0190000e+00   1.0216000e+01   7.8000000e-02   9.5200000e-01   9.9500000e-01
   2.0880000e+00   6.0000000e+00   4.5575620e+03   1.3445850e+03   6.8552890e+03   2.2403000e+01   2.2403000e+01   5.6183300e+02   2.8800000e+02   5.6860800e+02   1.2500000e+00   9.9800000e-01   6.7080000e+00   1.0190000e+00   2.3125000e+01   2.1300000e-01   9.5200000e-01   9.9500000e-01
   3.1440000e+00   9.0000000e+00   8.3810840e+03   1.3867680e+03   7.1589790e+03   6.0377000e+01   6.0377000e+01   5.8875500e+02   2.8800000e+02   5.8416000e+02   1.3870000e+00   9.9800000e-01   7.4300000e+00   1.0200000e+00   1.2376000e+01   2.4500000e-01   9.5200000e-01   9.9500000e-01
   4.1610000e+00   1.2000000e+01   1.4725804e+04   1.5474770e+03   7.8284400e+03   1.1381400e+02   1.1381400e+02   6.4287900e+02   2.8800000e+02   6.1018400e+02   1.6540000e+00   9.9800000e-01   8.8290000e+00   1.0220000e+00   1.7226000e+01   3.4100000e-01   9.5200000e-01   9.9500000e-01
   5.1400000e+00   1.5000000e+01   2.1639309e+04   1.9243470e+03   8.5111180e+03   1.7530500e+02   1.7530500e+02   7.1089500e+02   2.8800000e+02   6.4150500e+02   2.0730000e+00   9.9800000e-01   1.0973000e+01   1.0260000e+00   2.5208000e+01   4.9900000e-01   9.5200000e-01   9.9500000e-01
   6.1750000e+00   1.8000000e+01   2.9798051e+04   2.3072320e+03   8.8468460e+03   2.4629500e+02   2.4629500e+02   7.7729700e+02   2.8800000e+02   6.7147700e+02   2.4950000e+00   9.9800000e-01   1.3087000e+01   1.0300000e+00   3.4268000e+01   6.7800000e-01   9.5200000e-01   9.9500000e-01
   7.1480000e+00   2.1000000e+01   3.8975929e+04   2.6780770e+03   9.1415030e+03   3.3203700e+02   3.3203700e+02   8.3283500e+02   2.8800000e+02   6.9590400e+02   2.9530000e+00   9.9800000e-01   1.5346000e+01   1.0350000e+00   4.4197000e+01   8.7500000e-01   9.5200000e-01   9.9500000e-01
   8.2060000e+00   2.4000000e+01   5.0995049e+04   3.0875680e+03   9.3246260e+03   4.3810200e+02   4.3810200e+02   9.3024900e+02   2.8800000e+02   7.3792200e+02   3.5600000e+00   9.9800000e-01   1.8216000e+01   1.0410000e+00   6.0441000e+01   1.1970000e+00   9.5200000e-01   9.9500000e-01
   9.3000000e+00   2.7000000e+01   7.2778465e+04   3.5604380e+03   9.7913310e+03   6.4483000e+02   6.4483000e+02   1.0957830e+03   2.8800000e+02   7.8560200e+02   4.4760000e+00   9.9800000e-01   2.2283000e+01   1.0490000e+00   9.0302000e+01   1.7880000e+00   9.5200000e-01   9.9500000e-01
   1.1380000e+00   3.0000000e+00   5.6648700e+02   1.3619730e+03   6.7347580e+03   8.2550000e+00   8.2550000e+00   4.5581900e+02   2.8800000e+02   5.4880300e+02   1.1070000e+00   9.9800000e-01   5.8990000e+00   1.0190000e+00   0.0000000e+00   7.4000000e-02   9.5200000e-01   9.9600000e-01
   2.0880000e+00   6.0000000e+00   4.1965660e+03   1.3448320e+03   6.8579580e+03   2.2444000e+01   2.2444000e+01   5.5084300e+02   2.8800000e+02   5.6695100e+02   1.2380000e+00   9.9800000e-01   6.6370000e+00   1.0190000e+00   2.2527000e+01   2.0000000e-01   9.5200000e-01   9.9600000e-01
   3.1440000e+00   9.0000000e+00   8.3811200e+03   1.3867680e+03   7.1615710e+03   6.0377000e+01   6.0377000e+01   5.8795700e+02   2.8800000e+02   5.8401200e+02   1.3870000e+00   9.9800000e-01   7.4230000e+00   1.0200000e+00   1.2343000e+01   2.4400000e-01   9.5200000e-01   9.9600000e-01
   4.1610000e+00   1.2000000e+01   1.4725858e+04   1.5474770e+03   7.8304780e+03   1.1380100e+02   1.1380100e+02   6.4201900e+02   2.8800000e+02   6.1002600e+02   1.6540000e+00   9.9800000e-01   8.8200000e+00   1.0220000e+00   1.7185000e+01   3.4000000e-01   9.5200000e-01   9.9600000e-01
   5.1400000e+00   1.5000000e+01   2.1639350e+04   1.9243500e+03   8.5120320e+03   1.7535800e+02   1.7535800e+02   7.0994500e+02   2.8800000e+02   6.4132700e+02   2.0730000e+00   9.9800000e-01   1.0962000e+01   1.0260000e+00   2.5153000e+01   4.9800000e-01   9.5200000e-01   9.9600000e-01
   6.1750000e+00   1.8000000e+01   2.9798106e+04   2.3072240e+03   8.8478680e+03   2.4629700e+02   2.4629700e+02   7.7622900e+02   2.8800000e+02   6.7126100e+02   2.4950000e+00   9.9800000e-01   1.3073000e+01   1.0300000e+00   3.4198000e+01   6.7700000e-01   9.5200000e-01   9.9600000e-01
   7.1480000e+00   2.1000000e+01   3.8975641e+04   2.6780750e+03   9.1420070e+03   3.3206600e+02   3.3206600e+02   8.3183200e+02   2.8800000e+02   6.9573900e+02   2.9520000e+00   9.9800000e-01   1.5329000e+01   1.0350000e+00   4.4118000e+01   8.7300000e-01   9.5200000e-01   9.9600000e-01
   8.2060000e+00   2.4000000e+01   5.0994850e+04   3.0875630e+03   9.3250250e+03   4.3805100e+02   4.3805100e+02   9.2923600e+02   2.8800000e+02   7.3777200e+02   3.5590000e+00   9.9800000e-01   1.8196000e+01   1.0410000e+00   6.0347000e+01   1.1950000e+00   9.5200000e-01   9.9600000e-01
   9.3000000e+00   2.7000000e+01   7.2779115e+04   3.5604390e+03   9.7920470e+03   6.4512500e+02   6.4512500e+02   1.0949250e+03   2.8800000e+02   7.8547300e+02   4.4740000e+00   9.9800000e-01   2.2257000e+01   1.0490000e+00   9.0199000e+01   1.7860000e+00   9.5200000e-01   9.9600000e-01
   1.1380000e+00   3.0000000e+00   8.3610700e+02   1.3735790e+03   6.7452240e+03   8.9190000e+00   8.9190000e+00   4.6291000e+02   2.8800000e+02   5.5032800e+02   1.1190000e+00   9.9800000e-01   5.9570000e+00   1.0190000e+00   0.0000000e+00   8.2000000e-02   9.5200000e-01   9.9700000e-01
   2.0880000e+00   6.0000000e+00   4.1507520e+03   1.3449530e+03   6.8605760e+03   2.2459000e+01   2.2459000e+01   5.4873800e+02   2.8800000e+02   5.6657400e+02   1.2370000e+00   9.9800000e-01   6.6210000e+00   1.0190000e+00   2.2447000e+01   1.9800000e-01   9.5200000e-01   9.9700000e-01
   3.1440000e+00   9.0000000e+00   8.3812160e+03   1.3867690e+03   7.1641690e+03   6.0380000e+01   6.0380000e+01   5.8716100e+02   2.8800000e+02   5.8386400e+02   1.3870000e+00   9.9800000e-01   7.4150000e+00   1.0200000e+00   1.2310000e+01   2.4400000e-01   9.5200000e-01   9.9700000e-01
   4.1610000e+00   1.2000000e+01   1.4725988e+04   1.5474780e+03   7.8325250e+03   1.1381800e+02   1.1381800e+02   6.4116200e+02   2.8800000e+02   6.0986900e+02   1.6530000e+00   9.9800000e-01   8.8120000e+00   1.0220000e+00   1.7144000e+01   3.3900000e-01   9.5200000e-01   9.9700000e-01
   5.1400000e+00   1.5000000e+01   2.1639469e+04   1.9243520e+03   8.5129480e+03   1.7534400e+02   1.7534400e+02   7.0899800e+02   2.8800000e+02   6.4115000e+02   2.0730000e+00   9.9800000e-01   1.0951000e+01   1.0260000e+00   2.5099000e+01   4.9700000e-01   9.5200000e-01   9.9700000e-01
   6.1750000e+00   1.8000000e+01   2.9798404e+04   2.3072210e+03   8.8489040e+03   2.4633700e+02   2.4633700e+02   7.7516300e+02   2.8800000e+02   6.7104700e+02   2.4940000e+00   9.9800000e-01   1.3060000e+01   1.0300000e+00   3.4128000e+01   6.7600000e-01   9.5200000e-01   9.9700000e-01
   7.1480000e+00   2.1000000e+01   3.8975400e+04   2.6780770e+03   9.1425120e+03   3.3201400e+02   3.3201400e+02   8.3083300e+02   2.8800000e+02   6.9557500e+02   2.9510000e+00   9.9800000e-01   1.5313000e+01   1.0350000e+00   4.4039000e+01   8.7200000e-01   9.5200000e-01   9.9700000e-01
   8.2060000e+00   2.4000000e+01   5.0994720e+04   3.0875590e+03   9.3254240e+03   4.3806000e+02   4.3806000e+02   9.2822600e+02   2.8800000e+02   7.3762300e+02   3.5580000e+00   9.9800000e-01   1.8176000e+01   1.0410000e+00   6.0253000e+01   1.1930000e+00   9.5200000e-01   9.9700000e-01
   9.3000000e+00   2.7000000e+01   7.2779720e+04   3.5604400e+03   9.7927590e+03   6.4517100e+02   6.4517100e+02   1.0940690e+03   2.8800000e+02   7.8534400e+02   4.4730000e+00   9.9800000e-01   2.2230000e+01   1.0490000e+00   9.0097000e+01   1.7840000e+00   9.5200000e-01   9.9700000e-01
   1.1380000e+00   3.0000000e+00   1.0617750e+03   1.3822850e+03   6.7537280e+03   9.4220000e+00   9.4220000e+00   4.6901700e+02   2.8800000e+02   5.5157000e+02   1.1290000e+00   9.9800000e-01   6.0060000e+00   1.0190000e+00   0.0000000e+00   8.9000000e-02   9.5200000e-01   9.9800000e-01
   2.0880000e+00   6.0000000e+00   3.9748450e+03   1.3453790e+03   6.8634160e+03   2.2528000e+01   2.2528000e+01   5.4288500e+02   2.8800000e+02   5.6572500e+02   1.2310000e+00   9.9800000e-01   6.5840000e+00   1.0190000e+00   2.1796000e+01   1.9100000e-01   9.5200000e-01   9.9800000e-01
   3.1440000e+00   9.0000000e+00   8.3813850e+03   1.3867690e+03   7.1667720e+03   6.0375000e+01   6.0375000e+01   5.8636700e+02   2.8800000e+02   5.8371700e+02   1.3860000e+00   9.9800000e-01   7.4080000e+00   1.0200000e+00   1.2277000e+01   2.4300000e-01   9.5200000e-01   9.9800000e-01
   4.1610000e+00   1.2000000e+01   1.4726036e+04   1.5474790e+03   7.8345670e+03   1.1380500e+02   1.1380500e+02   6.4030600e+02   2.8800000e+02   6.0971200e+02   1.6530000e+00   9.9800000e-01   8.8030000e+00   1.0220000e+00   1.7102000e+01   3.3900000e-01   9.5200000e-01   9.9800000e-01
   5.1400000e+00   1.5000000e+01   2.1639632e+04   1.9243530e+03   8.5138650e+03   1.7536100e+02   1.7536100e+02   7.0805300e+02   2.8800000e+02   6.4097300e+02   2.0730000e+00   9.9800000e-01   1.0940000e+01   1.0260000e+00   2.5044000e+01   4.9600000e-01   9.5200000e-01   9.9800000e-01
   6.1750000e+00   1.8000000e+01   2.9798293e+04   2.3072120e+03   8.8499190e+03   2.4638800e+02   2.4638800e+02   7.7410100e+02   2.8800000e+02   6.7083300e+02   2.4940000e+00   9.9800000e-01   1.3047000e+01   1.0300000e+00   3.4058000e+01   6.7400000e-01   9.5200000e-01   9.9800000e-01
   7.1480000e+00   2.1000000e+01   3.8975050e+04   2.6780780e+03   9.1430150e+03   3.3211800e+02   3.3211800e+02   8.2983500e+02   2.8800000e+02   6.9541000e+02   2.9510000e+00   9.9800000e-01   1.5296000e+01   1.0350000e+00   4.3960000e+01   8.7000000e-01   9.5200000e-01   9.9800000e-01
   8.2060000e+00   2.4000000e+01   5.0994591e+04   3.0875550e+03   9.3258230e+03   4.3796200e+02   4.3796200e+02   9.2721900e+02   2.8800000e+02   7.3747400e+02   3.5570000e+00   9.9800000e-01   1.8155000e+01   1.0410000e+00   6.0159000e+01   1.1910000e+00   9.5200000e-01   9.9800000e-01
   9.3000000e+00   2.7000000e+01   7.2781524e+04   3.5604540e+03   9.7934890e+03   6.4488800e+02   6.4488800e+02   1.0932240e+03   2.8800000e+02   7.8521700e+02   4.4720000e+00   9.9800000e-01   2.2204000e+01   1.0490000e+00   8.9997000e+01   1.7820000e+00   9.5200000e-01   9.9800000e-01
   1.1380000e+00   3.0000000e+00   9.4733600e+02   1.3776190e+03   6.7530970e+03   9.1490000e+00   9.1490000e+00   4.6507500e+02   2.8800000e+02   5.5066100e+02   1.1240000e+00   9.9800000e-01   5.9710000e+00   1.0190000e+00   0.0000000e+00   8.5000000e-02   9.5200000e-01   9.9900000e-01
   2.0880000e+00   6.0000000e+00   4.0992340e+03   1.3452140e+03   6.8658660e+03   2.2504000e+01   2.2504000e+01   5.4571200e+02   2.8800000e+02   5.6609000e+02   1.2350000e+00   9.9800000e-01   6.6000000e+00   1.0190000e+00   2.2110000e+01   1.9500000e-01   9.5200000e-01   9.9900000e-01
   3.1440000e+00   9.0000000e+00   8.3814890e+03   1.3867700e+03   7.1693710e+03   6.0382000e+01   6.0382000e+01   5.8557400e+02   2.8800000e+02   5.8356900e+02   1.3860000e+00   9.9800000e-01   7.4010000e+00   1.0200000e+00   1.2244000e+01   2.4200000e-01   9.5200000e-01   9.9900000e-01
   4.1610000e+00   1.2000000e+01   1.4726138e+04   1.5474790e+03   7.8366140e+03   1.1380900e+02   1.1380900e+02   6.3945300e+02   2.8800000e+02   6.0955500e+02   1.6530000e+00   9.9800000e-01   8.7940000e+00   1.0220000e+00   1.7061000e+01   3.3800000e-01   9.5200000e-01   9.9900000e-01
   5.1400000e+00   1.5000000e+01   2.1639867e+04   1.9243550e+03   8.5147850e+03   1.7536400e+02   1.7536400e+02   7.0711100e+02   2.8800000e+02   6.4079700e+02   2.0720000e+00   9.9800000e-01   1.0929000e+01   1.0260000e+00   2.4990000e+01   4.9500000e-01   9.5200000e-01   9.9900000e-01
   6.1750000e+00   1.8000000e+01   2.9798536e+04   2.3072100e+03   8.8509540e+03   2.4634300e+02   2.4634300e+02   7.7304000e+02   2.8800000e+02   6.7062000e+02   2.4940000e+00   9.9800000e-01   1.3033000e+01   1.0300000e+00   3.3989000e+01   6.7300000e-01   9.5200000e-01   9.9900000e-01
   7.1480000e+00   2.1000000e+01   3.8974824e+04   2.6780770e+03   9.1435190e+03   3.3201000e+02   3.3201000e+02   8.2884100e+02   2.8800000e+02   6.9524700e+02   2.9500000e+00   9.9800000e-01   1.5280000e+01   1.0350000e+00   4.3882000e+01   8.6900000e-01   9.5200000e-01   9.9900000e-01
   8.2060000e+00   2.4000000e+01   5.0994536e+04   3.0875520e+03   9.3262210e+03   4.3805200e+02   4.3805200e+02   9.2621500e+02   2.8800000e+02   7.3732600e+02   3.5570000e+00   9.9800000e-01   1.8135000e+01   1.0410000e+00   6.0065000e+01   1.1890000e+00   9.5200000e-01   9.9900000e-01
   9.3000000e+00   2.7000000e+01   7.2781979e+04   3.5605470e+03   9.7942130e+03   6.4487800e+02   6.4487800e+02   1.0923810e+03   2.8800000e+02   7.8509100e+02   4.4710000e+00   9.9800000e-01   2.2178000e+01   1.0490000e+00   8.9896000e+01   1.7800000e+00   9.5200000e-01   9.9900000e-01
   1.1380000e+00   3.0000000e+00   1.2983310e+03   1.3893170e+03   6.7636590e+03   9.8360000e+00   9.8360000e+00   4.7457400e+02   2.8800000e+02   5.5273400e+02   1.1390000e+00   9.9800000e-01   6.0510000e+00   1.0190000e+00   0.0000000e+00   9.6000000e-02   9.5200000e-01   1.0000000e+00
   2.0880000e+00   6.0000000e+00   3.7328140e+03   1.3465290e+03   6.8691290e+03   2.2731000e+01   2.2731000e+01   5.3410400e+02   2.8800000e+02   5.6445100e+02   1.2230000e+00   9.9800000e-01   6.5310000e+00   1.0190000e+00   2.0525000e+01   1.8000000e-01   9.5200000e-01   1.0000000e+00
   3.1440000e+00   9.0000000e+00   8.3815740e+03   1.3867710e+03   7.1719690e+03   6.0382000e+01   6.0382000e+01   5.8478300e+02   2.8800000e+02   5.8342200e+02   1.3860000e+00   9.9800000e-01   7.3940000e+00   1.0200000e+00   1.2210000e+01   2.4200000e-01   9.5200000e-01   1.0000000e+00
   4.1610000e+00   1.2000000e+01   1.4726194e+04   1.5474800e+03   7.8386600e+03   1.1382100e+02   1.1382100e+02   6.3860200e+02   2.8800000e+02   6.0939800e+02   1.6530000e+00   9.9800000e-01   8.7850000e+00   1.0220000e+00   1.7020000e+01   3.3700000e-01   9.5200000e-01   1.0000000e+00
   5.1400000e+00   1.5000000e+01   2.1640106e+04   1.9243570e+03   8.5157050e+03   1.7532600e+02   1.7532600e+02   7.0617100e+02   2.8800000e+02   6.4062100e+02   2.0720000e+00   9.9800000e-01   1.0918000e+01   1.0260000e+00   2.4936000e+01   4.9400000e-01   9.5200000e-01   1.0000000e+00
   6.1750000e+00   1.8000000e+01   2.9798554e+04   2.3072050e+03   8.8519780e+03   2.4635300e+02   2.4635300e+02   7.7198300e+02   2.8800000e+02   6.7040700e+02   2.4930000e+00   9.9800000e-01   1.3020000e+01   1.0300000e+00   3.3919000e+01   6.7200000e-01   9.5200000e-01   1.0000000e+00
   7.1480000e+00   2.1000000e+01   3.8974539e+04   2.6780780e+03   9.1440220e+03   3.3202200e+02   3.3202200e+02   8.2784900e+02   2.8800000e+02   6.9508300e+02   2.9500000e+00   9.9800000e-01   1.5263000e+01   1.0350000e+00   4.3804000e+01   8.6700000e-01   9.5200000e-01   1.0000000e+00
   8.2060000e+00   2.4000000e+01   5.0994481e+04   3.0875490e+03   9.3266190e+03   4.3800800e+02   4.3800800e+02   9.2521500e+02   2.8800000e+02   7.3717900e+02   3.5560000e+00   9.9800000e-01   1.8115000e+01   1.0410000e+00   5.9971000e+01   1.1870000e+00   9.5200000e-01   1.0000000e+00
   9.3000000e+00   2.7000000e+01   7.2784872e+04   3.5607400e+03   9.7949910e+03   6.4520600e+02   6.4520600e+02   1.0915660e+03   2.8800000e+02   7.8496900e+02   4.4700000e+00   9.9800000e-01   2.2152000e+01   1.0490000e+00   8.9799000e+01   1.7780000e+00   9.5200000e-01   1.0000000e+00
   1.1380000e+00   3.0000000e+00   1.3266050e+03   1.3164820e+03   6.6507900e+03   5.7750000e+00   5.7750000e+00   5.1729000e+02   2.8800000e+02   5.5607200e+02   1.1330000e+00   9.9800000e-01   6.1850000e+00   1.0190000e+00   2.7348000e+01   1.5700000e-01   9.5300000e-01   9.7500000e-01
   2.0880000e+00   6.0000000e+00   6.9079680e+03   1.3672350e+03   6.8160560e+03   2.6548000e+01   2.6548000e+01   6.3517500e+02   2.8800000e+02   5.8059400e+02   1.3280000e+00   9.9800000e-01   7.2640000e+00   1.0190000e+00   1.4995000e+01   2.9000000e-01   9.5300000e-01   9.7500000e-01
   3.1440000e+00   9.0000000e+00   8.3788570e+03   1.3867550e+03   7.1048690e+03   6.0348000e+01   6.0348000e+01   6.0459100e+02   2.8800000e+02   5.8691700e+02   1.3890000e+00   9.9800000e-01   7.5750000e+00   1.0200000e+00   1.3034000e+01   2.5800000e-01   9.5300000e-01   9.7500000e-01
   4.1610000e+00   1.2000000e+01   1.4724002e+04   1.5474630e+03   7.7856600e+03   1.1377300e+02   1.1377300e+02   6.6005000e+02   2.8800000e+02   6.1318100e+02   1.6580000e+00   9.9800000e-01   9.0100000e+00   1.0220000e+00   1.8053000e+01   3.5700000e-01   9.5300000e-01   9.7500000e-01
   5.1400000e+00   1.5000000e+01   2.1635529e+04   1.9243120e+03   8.4918440e+03   1.7527400e+02   1.7527400e+02   7.2985800e+02   2.8800000e+02   6.4487900e+02   2.0790000e+00   9.9800000e-01   1.1201000e+01   1.0260000e+00   2.6300000e+01   5.2100000e-01   9.5300000e-01   9.7500000e-01
   6.1750000e+00   1.8000000e+01   2.9791743e+04   2.3074330e+03   8.8250620e+03   2.4624000e+02   2.4624000e+02   7.9882000e+02   2.8800000e+02   6.7565100e+02   2.5030000e+00   9.9800000e-01   1.3362000e+01   1.0300000e+00   3.5682000e+01   7.0600000e-01   9.5300000e-01   9.7500000e-01
   7.1480000e+00   2.1000000e+01   3.8984061e+04   2.6780850e+03   9.1309080e+03   3.3222000e+02   3.3222000e+02   8.5268400e+02   2.8800000e+02   6.9899100e+02   2.9650000e+00   9.9800000e-01   1.5689000e+01   1.0350000e+00   4.5773000e+01   9.0600000e-01   9.5300000e-01   9.7500000e-01
   8.2060000e+00   2.4000000e+01   5.0996237e+04   3.0875410e+03   9.3167010e+03   4.3813500e+02   4.3813500e+02   9.5008400e+02   2.8800000e+02   7.4079300e+02   3.5780000e+00   9.9800000e-01   1.8642000e+01   1.0410000e+00   6.2322000e+01   1.2340000e+00   9.5300000e-01   9.7500000e-01
   9.3000000e+00   2.7000000e+01   7.2761919e+04   3.5603970e+03   9.7749370e+03   6.4505400e+02   6.4505400e+02   1.1122530e+03   2.8800000e+02   7.8798200e+02   4.5010000e+00   9.9800000e-01   2.2831000e+01   1.0490000e+00   9.2317000e+01   1.8270000e+00   9.5300000e-01   9.7500000e-01
   1.1380000e+00   3.0000000e+00   2.8385500e+02   1.3390210e+03   6.6662930e+03   6.9930000e+00   6.9930000e+00   4.6770900e+02   2.8800000e+02   5.4984600e+02   1.0950000e+00   9.9800000e-01   5.9420000e+00   1.0190000e+00   1.2683000e+01   9.1000000e-02   9.5300000e-01   9.7600000e-01
   2.0880000e+00   6.0000000e+00   6.8637850e+03   1.3652110e+03   6.8173660e+03   2.6178000e+01   2.6178000e+01   6.3366000e+02   2.8800000e+02   5.8025500e+02   1.3260000e+00   9.9800000e-01   7.2470000e+00   1.0190000e+00   1.6125000e+01   2.8900000e-01   9.5300000e-01   9.7600000e-01
   3.1440000e+00   9.0000000e+00   8.3789330e+03   1.3867560e+03   7.1074480e+03   6.0347000e+01   6.0347000e+01   6.0376000e+02   2.8800000e+02   5.8676700e+02   1.3890000e+00   9.9800000e-01   7.5680000e+00   1.0200000e+00   1.3000000e+01   2.5700000e-01   9.5300000e-01   9.7600000e-01
   4.1610000e+00   1.2000000e+01   1.4724039e+04   1.5474640e+03   7.7876600e+03   1.1378900e+02   1.1378900e+02   6.5914700e+02   2.8800000e+02   6.1301700e+02   1.6580000e+00   9.9800000e-01   9.0010000e+00   1.0220000e+00   1.8010000e+01   3.5700000e-01   9.5300000e-01   9.7600000e-01
   5.1400000e+00   1.5000000e+01   2.1635656e+04   1.9243130e+03   8.4927550e+03   1.7526800e+02   1.7526800e+02   7.2885900e+02   2.8800000e+02   6.4469400e+02   2.0790000e+00   9.9800000e-01   1.1190000e+01   1.0260000e+00   2.6243000e+01   5.1900000e-01   9.5300000e-01   9.7600000e-01
   6.1750000e+00   1.8000000e+01   2.9792107e+04   2.3074230e+03   8.8261000e+03   2.4628800e+02   2.4628800e+02   7.9768500e+02   2.8800000e+02   6.7542400e+02   2.5020000e+00   9.9800000e-01   1.3348000e+01   1.0300000e+00   3.5609000e+01   7.0500000e-01   9.5300000e-01   9.7600000e-01
   7.1480000e+00   2.1000000e+01   3.8983650e+04   2.6780850e+03   9.1314090e+03   3.3214500e+02   3.3214500e+02   8.5163900e+02   2.8800000e+02   6.9881500e+02   2.9650000e+00   9.9800000e-01   1.5671000e+01   1.0350000e+00   4.5691000e+01   9.0500000e-01   9.5300000e-01   9.7600000e-01
   8.2060000e+00   2.4000000e+01   5.0996704e+04   3.0875650e+03   9.3170760e+03   4.3799500e+02   4.3799500e+02   9.4903400e+02   2.8800000e+02   7.4062700e+02   3.5780000e+00   9.9800000e-01   1.8621000e+01   1.0410000e+00   6.2225000e+01   1.2320000e+00   9.5300000e-01   9.7600000e-01
   9.3000000e+00   2.7000000e+01   7.2763608e+04   3.5603930e+03   9.7757510e+03   6.4500500e+02   6.4500500e+02   1.1113520e+03   2.8800000e+02   7.8783600e+02   4.5000000e+00   9.9800000e-01   2.2803000e+01   1.0490000e+00   9.2211000e+01   1.8250000e+00   9.5300000e-01   9.7600000e-01
   1.1380000e+00   3.0000000e+00   4.5888400e+02   1.3586360e+03   6.6819530e+03   8.0860000e+00   8.0860000e+00   4.6394100e+02   2.8800000e+02   5.5060100e+02   1.1030000e+00   9.9800000e-01   5.9720000e+00   1.0190000e+00   1.6590000e+00   7.9000000e-02   9.5300000e-01   9.7700000e-01
   2.0880000e+00   6.0000000e+00   6.7344260e+03   1.3613930e+03   6.8175890e+03   2.5477000e+01   2.5477000e+01   6.3038400e+02   2.8800000e+02   5.7956500e+02   1.3210000e+00   9.9800000e-01   7.2150000e+00   1.0190000e+00   1.7924000e+01   2.8700000e-01   9.5300000e-01   9.7700000e-01
   3.1440000e+00   9.0000000e+00   8.3790350e+03   1.3867570e+03   7.1100300e+03   6.0345000e+01   6.0345000e+01   6.0293100e+02   2.8800000e+02   5.8661700e+02   1.3890000e+00   9.9800000e-01   7.5610000e+00   1.0200000e+00   1.2966000e+01   2.5700000e-01   9.5300000e-01   9.7700000e-01
   4.1610000e+00   1.2000000e+01   1.4724149e+04   1.5474640e+03   7.7896670e+03   1.1379700e+02   1.1379700e+02   6.5824700e+02   2.8800000e+02   6.1285400e+02   1.6580000e+00   9.9800000e-01   8.9920000e+00   1.0220000e+00   1.7967000e+01   3.5600000e-01   9.5300000e-01   9.7700000e-01
   5.1400000e+00   1.5000000e+01   2.1635847e+04   1.9243150e+03   8.4936690e+03   1.7529800e+02   1.7529800e+02   7.2786300e+02   2.8800000e+02   6.4450900e+02   2.0790000e+00   9.9800000e-01   1.1178000e+01   1.0260000e+00   2.6187000e+01   5.1800000e-01   9.5300000e-01   9.7700000e-01
   6.1750000e+00   1.8000000e+01   2.9792460e+04   2.3074090e+03   8.8271380e+03   2.4624200e+02   2.4624200e+02   7.9655300e+02   2.8800000e+02   6.7519800e+02   2.5020000e+00   9.9800000e-01   1.3334000e+01   1.0300000e+00   3.5535000e+01   7.0400000e-01   9.5300000e-01   9.7700000e-01
   7.1480000e+00   2.1000000e+01   3.8983212e+04   2.6780860e+03   9.1319100e+03   3.3218800e+02   3.3218800e+02   8.5059700e+02   2.8800000e+02   6.9864000e+02   2.9640000e+00   9.9800000e-01   1.5654000e+01   1.0350000e+00   4.5610000e+01   9.0300000e-01   9.5300000e-01   9.7700000e-01
   8.2060000e+00   2.4000000e+01   5.0997111e+04   3.0875820e+03   9.3174490e+03   4.3809200e+02   4.3809200e+02   9.4798700e+02   2.8800000e+02   7.4046200e+02   3.5770000e+00   9.9800000e-01   1.8599000e+01   1.0410000e+00   6.2127000e+01   1.2300000e+00   9.5300000e-01   9.7700000e-01
   9.3000000e+00   2.7000000e+01   7.2763282e+04   3.5604070e+03   9.7765360e+03   6.4506100e+02   6.4506100e+02   1.1104420e+03   2.8800000e+02   7.8769100e+02   4.4990000e+00   9.9800000e-01   2.2776000e+01   1.0490000e+00   9.2103000e+01   1.8230000e+00   9.5300000e-01   9.7700000e-01
   1.1380000e+00   3.0000000e+00   8.1477600e+02   1.3739690e+03   6.6950660e+03   8.9680000e+00   8.9680000e+00   4.7365900e+02   2.8800000e+02   5.5281700e+02   1.1190000e+00   9.9800000e-01   6.0590000e+00   1.0190000e+00   0.0000000e+00   8.9000000e-02   9.5300000e-01   9.7800000e-01
   2.0880000e+00   6.0000000e+00   6.7213500e+03   1.3611260e+03   6.8199500e+03   2.5432000e+01   2.5432000e+01   6.2922500e+02   2.8800000e+02   5.7938000e+02   1.3200000e+00   9.9800000e-01   7.2060000e+00   1.0190000e+00   1.8094000e+01   2.8600000e-01   9.5300000e-01   9.7800000e-01
   3.1440000e+00   9.0000000e+00   8.3791640e+03   1.3867570e+03   7.1126140e+03   6.0352000e+01   6.0352000e+01   6.0210400e+02   2.8800000e+02   5.8646700e+02   1.3890000e+00   9.9800000e-01   7.5530000e+00   1.0200000e+00   1.2932000e+01   2.5600000e-01   9.5300000e-01   9.7800000e-01
   4.1610000e+00   1.2000000e+01   1.4724164e+04   1.5474650e+03   7.7916700e+03   1.1379700e+02   1.1379700e+02   6.5734800e+02   2.8800000e+02   6.1269100e+02   1.6580000e+00   9.9800000e-01   8.9830000e+00   1.0220000e+00   1.7924000e+01   3.5500000e-01   9.5300000e-01   9.7800000e-01
   5.1400000e+00   1.5000000e+01   2.1635978e+04   1.9243170e+03   8.4945810e+03   1.7530300e+02   1.7530300e+02   7.2686900e+02   2.8800000e+02   6.4432500e+02   2.0790000e+00   9.9800000e-01   1.1167000e+01   1.0260000e+00   2.6130000e+01   5.1700000e-01   9.5300000e-01   9.7800000e-01
   6.1750000e+00   1.8000000e+01   2.9792810e+04   2.3073980e+03   8.8281750e+03   2.4621300e+02   2.4621300e+02   7.9542500e+02   2.8800000e+02   6.7497200e+02   2.5020000e+00   9.9800000e-01   1.3320000e+01   1.0300000e+00   3.5462000e+01   7.0200000e-01   9.5300000e-01   9.7800000e-01
   7.1480000e+00   2.1000000e+01   3.8982816e+04   2.6780870e+03   9.1324110e+03   3.3210300e+02   3.3210300e+02   8.4955800e+02   2.8800000e+02   6.9846500e+02   2.9640000e+00   9.9800000e-01   1.5637000e+01   1.0350000e+00   4.5528000e+01   9.0100000e-01   9.5300000e-01   9.7800000e-01
   8.2060000e+00   2.4000000e+01   5.0997390e+04   3.0875980e+03   9.3178190e+03   4.3813600e+02   4.3813600e+02   9.4694300e+02   2.8800000e+02   7.4029800e+02   3.5760000e+00   9.9800000e-01   1.8578000e+01   1.0410000e+00   6.2030000e+01   1.2280000e+00   9.5300000e-01   9.7800000e-01
   9.3000000e+00   2.7000000e+01   7.2765007e+04   3.5604050e+03   9.7773420e+03   6.4507100e+02   6.4507100e+02   1.1095460e+03   2.8800000e+02   7.8754700e+02   4.4980000e+00   9.9800000e-01   2.2748000e+01   1.0490000e+00   9.1997000e+01   1.8210000e+00   9.5300000e-01   9.7800000e-01
   1.1380000e+00   3.0000000e+00   1.0698070e+03   1.3827800e+03   6.7037400e+03   9.4800000e+00   9.4800000e+00   4.8071700e+02   2.8800000e+02   5.5422900e+02   1.1310000e+00   9.9800000e-01   6.1140000e+00   1.0190000e+00   0.0000000e+00   9.7000000e-02   9.5300000e-01   9.7900000e-01
   2.0880000e+00   6.0000000e+00   6.6383590e+03   1.3590920e+03   6.8212320e+03   2.5064000e+01   2.5064000e+01   6.2668000e+02   2.8800000e+02   5.7889800e+02   1.3170000e+00   9.9800000e-01   7.1830000e+00   1.0190000e+00   1.9003000e+01   2.8400000e-01   9.5300000e-01   9.7900000e-01
   3.1440000e+00   9.0000000e+00   8.3792430e+03   1.3867580e+03   7.1151960e+03   6.0360000e+01   6.0360000e+01   6.0127800e+02   2.8800000e+02   5.8631800e+02   1.3890000e+00   9.9800000e-01   7.5460000e+00   1.0200000e+00   1.2898000e+01   2.5500000e-01   9.5300000e-01   9.7900000e-01
   4.1610000e+00   1.2000000e+01   1.4724321e+04   1.5474660e+03   7.7936850e+03   1.1379900e+02   1.1379900e+02   6.5645200e+02   2.8800000e+02   6.1252800e+02   1.6570000e+00   9.9800000e-01   8.9740000e+00   1.0220000e+00   1.7881000e+01   3.5400000e-01   9.5300000e-01   9.7900000e-01
   5.1400000e+00   1.5000000e+01   2.1636258e+04   1.9243170e+03   8.4954970e+03   1.7527700e+02   1.7527700e+02   7.2587900e+02   2.8800000e+02   6.4414200e+02   2.0780000e+00   9.9800000e-01   1.1155000e+01   1.0260000e+00   2.6074000e+01   5.1600000e-01   9.5300000e-01   9.7900000e-01
   6.1750000e+00   1.8000000e+01   2.9793089e+04   2.3073820e+03   8.8292090e+03   2.4625600e+02   2.4625600e+02   7.9430000e+02   2.8800000e+02   6.7474700e+02   2.5010000e+00   9.9800000e-01   1.3307000e+01   1.0300000e+00   3.5389000e+01   7.0100000e-01   9.5300000e-01   9.7900000e-01
   7.1480000e+00   2.1000000e+01   3.8982405e+04   2.6780880e+03   9.1329110e+03   3.3209500e+02   3.3209500e+02   8.4852200e+02   2.8800000e+02   6.9829100e+02   2.9630000e+00   9.9800000e-01   1.5619000e+01   1.0350000e+00   4.5447000e+01   9.0000000e-01   9.5300000e-01   9.7900000e-01
   8.2060000e+00   2.4000000e+01   5.0997561e+04   3.0876110e+03   9.3181870e+03   4.3813600e+02   4.3813600e+02   9.4590200e+02   2.8800000e+02   7.4013300e+02   3.5750000e+00   9.9800000e-01   1.8557000e+01   1.0410000e+00   6.1933000e+01   1.2260000e+00   9.5300000e-01   9.7900000e-01
   9.3000000e+00   2.7000000e+01   7.2765953e+04   3.5604040e+03   9.7781330e+03   6.4482000e+02   6.4482000e+02   1.1086480e+03   2.8800000e+02   7.8740400e+02   4.4970000e+00   9.9800000e-01   2.2721000e+01   1.0490000e+00   9.1891000e+01   1.8190000e+00   9.5300000e-01   9.7900000e-01
   1.1380000e+00   3.0000000e+00   1.3468470e+03   1.3912040e+03   6.7122000e+03   9.9770000e+00   9.9770000e+00   4.8829500e+02   2.8800000e+02   5.5570600e+02   1.1420000e+00   9.9800000e-01   6.1730000e+00   1.0190000e+00   0.0000000e+00   1.0600000e-01   9.5300000e-01   9.8000000e-01
   2.0880000e+00   6.0000000e+00   6.4017580e+03   1.3552010e+03   6.8213660e+03   2.4356000e+01   2.4356000e+01   6.2056900e+02   2.8800000e+02   5.7779100e+02   1.3090000e+00   9.9800000e-01   7.1310000e+00   1.0190000e+00   2.0523000e+01   2.7800000e-01   9.5300000e-01   9.8000000e-01
   3.1440000e+00   9.0000000e+00   8.3793570e+03   1.3867580e+03   7.1177810e+03   6.0354000e+01   6.0354000e+01   6.0045400e+02   2.8800000e+02   5.8616800e+02   1.3890000e+00   9.9800000e-01   7.5390000e+00   1.0200000e+00   1.2864000e+01   2.5500000e-01   9.5300000e-01   9.8000000e-01
   4.1610000e+00   1.2000000e+01   1.4724325e+04   1.5474670e+03   7.7956900e+03   1.1379200e+02   1.1379200e+02   6.5555800e+02   2.8800000e+02   6.1236500e+02   1.6570000e+00   9.9800000e-01   8.9640000e+00   1.0220000e+00   1.7839000e+01   3.5300000e-01   9.5300000e-01   9.8000000e-01
   5.1400000e+00   1.5000000e+01   2.1636529e+04   1.9243180e+03   8.4964130e+03   1.7532800e+02   1.7532800e+02   7.2489100e+02   2.8800000e+02   6.4395900e+02   2.0780000e+00   9.9800000e-01   1.1144000e+01   1.0260000e+00   2.6017000e+01   5.1500000e-01   9.5300000e-01   9.8000000e-01
   6.1750000e+00   1.8000000e+01   2.9793414e+04   2.3073700e+03   8.8302450e+03   2.4628500e+02   2.4628500e+02   7.9317900e+02   2.8800000e+02   6.7452200e+02   2.5010000e+00   9.9800000e-01   1.3293000e+01   1.0300000e+00   3.5316000e+01   6.9900000e-01   9.5300000e-01   9.8000000e-01
   7.1480000e+00   2.1000000e+01   3.8981995e+04   2.6780880e+03   9.1334100e+03   3.3221200e+02   3.3221200e+02   8.4748800e+02   2.8800000e+02   6.9811800e+02   2.9620000e+00   9.9800000e-01   1.5602000e+01   1.0350000e+00   4.5366000e+01   8.9800000e-01   9.5300000e-01   9.8000000e-01
   8.2060000e+00   2.4000000e+01   5.0997711e+04   3.0876200e+03   9.3185530e+03   4.3811200e+02   4.3811200e+02   9.4486300e+02   2.8800000e+02   7.3997000e+02   3.5740000e+00   9.9800000e-01   1.8535000e+01   1.0410000e+00   6.1836000e+01   1.2240000e+00   9.5300000e-01   9.8000000e-01
   9.3000000e+00   2.7000000e+01   7.2766525e+04   3.5604100e+03   9.7789160e+03   6.4479300e+02   6.4479300e+02   1.1077510e+03   2.8800000e+02   7.8726100e+02   4.4950000e+00   9.9800000e-01   2.2694000e+01   1.0490000e+00   9.1785000e+01   1.8170000e+00   9.5300000e-01   9.8000000e-01
   1.1380000e+00   3.0000000e+00   2.1278630e+03   1.4080250e+03   6.7266450e+03   1.0996000e+01   1.0996000e+01   5.1167100e+02   2.8800000e+02   5.6009100e+02   1.1750000e+00   9.9800000e-01   6.3510000e+00   1.0190000e+00   0.0000000e+00   1.3200000e-01   9.5300000e-01   9.8100000e-01
   2.0880000e+00   6.0000000e+00   6.1817540e+03   1.3525400e+03   6.8222480e+03   2.3869000e+01   2.3869000e+01   6.1457300e+02   2.8800000e+02   5.7680600e+02   1.3020000e+00   9.9800000e-01   7.0850000e+00   1.0190000e+00   2.1533000e+01   2.7100000e-01   9.5300000e-01   9.8100000e-01
   3.1440000e+00   9.0000000e+00   8.3795200e+03   1.3867590e+03   7.1203690e+03   6.0364000e+01   6.0364000e+01   5.9963200e+02   2.8800000e+02   5.8601900e+02   1.3890000e+00   9.9800000e-01   7.5310000e+00   1.0200000e+00   1.2830000e+01   2.5400000e-01   9.5300000e-01   9.8100000e-01
   4.1610000e+00   1.2000000e+01   1.4724465e+04   1.5474670e+03   7.7977080e+03   1.1378800e+02   1.1378800e+02   6.5466700e+02   2.8800000e+02   6.1220300e+02   1.6570000e+00   9.9800000e-01   8.9550000e+00   1.0220000e+00   1.7796000e+01   3.5200000e-01   9.5300000e-01   9.8100000e-01
   5.1400000e+00   1.5000000e+01   2.1636808e+04   1.9243200e+03   8.4973290e+03   1.7528000e+02   1.7528000e+02   7.2390600e+02   2.8800000e+02   6.4377600e+02   2.0780000e+00   9.9800000e-01   1.1132000e+01   1.0260000e+00   2.5961000e+01   5.1400000e-01   9.5300000e-01   9.8100000e-01
   6.1750000e+00   1.8000000e+01   2.9793696e+04   2.3073580e+03   8.8312790e+03   2.4624900e+02   2.4624900e+02   7.9206100e+02   2.8800000e+02   6.7429800e+02   2.5000000e+00   9.9800000e-01   1.3279000e+01   1.0300000e+00   3.5243000e+01   6.9800000e-01   9.5300000e-01   9.8100000e-01
   7.1480000e+00   2.1000000e+01   3.8981602e+04   2.6780880e+03   9.1339100e+03   3.3218700e+02   3.3218700e+02   8.4645800e+02   2.8800000e+02   6.9794500e+02   2.9620000e+00   9.9800000e-01   1.5585000e+01   1.0350000e+00   4.5285000e+01   8.9700000e-01   9.5300000e-01   9.8100000e-01
   8.2060000e+00   2.4000000e+01   5.0997758e+04   3.0876270e+03   9.3189180e+03   4.3811800e+02   4.3811800e+02   9.4382700e+02   2.8800000e+02   7.3980700e+02   3.5730000e+00   9.9800000e-01   1.8514000e+01   1.0410000e+00   6.1739000e+01   1.2220000e+00   9.5300000e-01   9.8100000e-01
   9.3000000e+00   2.7000000e+01   7.2766931e+04   3.5604150e+03   9.7796920e+03   6.4474100e+02   6.4474100e+02   1.1068560e+03   2.8800000e+02   7.8711900e+02   4.4940000e+00   9.9800000e-01   2.2666000e+01   1.0490000e+00   9.1678000e+01   1.8150000e+00   9.5300000e-01   9.8100000e-01
   1.1380000e+00   3.0000000e+00   2.6363270e+03   1.4142820e+03   6.7337220e+03   1.1389000e+01   1.1389000e+01   5.2663400e+02   2.8800000e+02   5.6262900e+02   1.1950000e+00   9.9800000e-01   6.4570000e+00   1.0190000e+00   0.0000000e+00   1.5000000e-01   9.5300000e-01   9.8200000e-01
   2.0880000e+00   6.0000000e+00   6.2022630e+03   1.3526790e+03   6.8248700e+03   2.3887000e+01   2.3887000e+01   6.1418800e+02   2.8800000e+02   5.7671100e+02   1.3020000e+00   9.9800000e-01   7.0810000e+00   1.0190000e+00   2.1327000e+01   2.7100000e-01   9.5300000e-01   9.8200000e-01
   3.1440000e+00   9.0000000e+00   8.3795940e+03   1.3867590e+03   7.1229530e+03   6.0359000e+01   6.0359000e+01   5.9881100e+02   2.8800000e+02   5.8587000e+02   1.3880000e+00   9.9800000e-01   7.5240000e+00   1.0200000e+00   1.2796000e+01   2.5300000e-01   9.5300000e-01   9.8200000e-01
   4.1610000e+00   1.2000000e+01   1.4724497e+04   1.5474680e+03   7.7997180e+03   1.1378800e+02   1.1378800e+02   6.5377700e+02   2.8800000e+02   6.1204100e+02   1.6570000e+00   9.9800000e-01   8.9460000e+00   1.0220000e+00   1.7754000e+01   3.5100000e-01   9.5300000e-01   9.8200000e-01
   5.1400000e+00   1.5000000e+01   2.1636748e+04   1.9243230e+03   8.4982360e+03   1.7532100e+02   1.7532100e+02   7.2292100e+02   2.8800000e+02   6.4359300e+02   2.0770000e+00   9.9800000e-01   1.1121000e+01   1.0260000e+00   2.5905000e+01   5.1300000e-01   9.5300000e-01   9.8200000e-01
   6.1750000e+00   1.8000000e+01   2.9793976e+04   2.3073430e+03   8.8323110e+03   2.4631300e+02   2.4631300e+02   7.9094700e+02   2.8800000e+02   6.7407500e+02   2.5000000e+00   9.9800000e-01   1.3265000e+01   1.0300000e+00   3.5170000e+01   6.9600000e-01   9.5300000e-01   9.8200000e-01
   7.1480000e+00   2.1000000e+01   3.8981060e+04   2.6780860e+03   9.1344160e+03   3.3206900e+02   3.3206900e+02   8.4542200e+02   2.8800000e+02   6.9777300e+02   2.9610000e+00   9.9800000e-01   1.5568000e+01   1.0350000e+00   4.5203000e+01   8.9500000e-01   9.5300000e-01   9.8200000e-01
   8.2060000e+00   2.4000000e+01   5.0997742e+04   3.0876280e+03   9.3192800e+03   4.3799800e+02   4.3799800e+02   9.4279400e+02   2.8800000e+02   7.3964400e+02   3.5720000e+00   9.9800000e-01   1.8493000e+01   1.0410000e+00   6.1642000e+01   1.2200000e+00   9.5300000e-01   9.8200000e-01
   9.3000000e+00   2.7000000e+01   7.2768730e+04   3.5604130e+03   9.7804820e+03   6.4480500e+02   6.4480500e+02   1.1059710e+03   2.8800000e+02   7.8697900e+02   4.4930000e+00   9.9800000e-01   2.2639000e+01   1.0490000e+00   9.1574000e+01   1.8130000e+00   9.5300000e-01   9.8200000e-01
   1.1380000e+00   3.0000000e+00   3.3731510e+03   1.4183810e+03   6.7394970e+03   1.1649000e+01   1.1649000e+01   5.4838400e+02   2.8800000e+02   5.6601300e+02   1.2220000e+00   9.9800000e-01   6.6010000e+00   1.0190000e+00   0.0000000e+00   1.7500000e-01   9.5300000e-01   9.8300000e-01
   2.0880000e+00   6.0000000e+00   6.3254620e+03   1.3544220e+03   6.8285210e+03   2.4215000e+01   2.4215000e+01   6.1616600e+02   2.8800000e+02   5.7707300e+02   1.3060000e+00   9.9800000e-01   7.0980000e+00   1.0190000e+00   2.0804000e+01   2.7400000e-01   9.5300000e-01   9.8300000e-01
   3.1440000e+00   9.0000000e+00   8.3796660e+03   1.3867600e+03   7.1255370e+03   6.0361000e+01   6.0361000e+01   5.9799200e+02   2.8800000e+02   5.8572000e+02   1.3880000e+00   9.9800000e-01   7.5170000e+00   1.0200000e+00   1.2762000e+01   2.5300000e-01   9.5300000e-01   9.8300000e-01
   4.1610000e+00   1.2000000e+01   1.4724615e+04   1.5474680e+03   7.8017380e+03   1.1380200e+02   1.1380200e+02   6.5289100e+02   2.8800000e+02   6.1187900e+02   1.6560000e+00   9.9800000e-01   8.9370000e+00   1.0220000e+00   1.7711000e+01   3.5100000e-01   9.5300000e-01   9.8300000e-01
   5.1400000e+00   1.5000000e+01   2.1636998e+04   1.9243250e+03   8.4991520e+03   1.7528700e+02   1.7528700e+02   7.2194100e+02   2.8800000e+02   6.4341100e+02   2.0770000e+00   9.9800000e-01   1.1109000e+01   1.0260000e+00   2.5849000e+01   5.1200000e-01   9.5300000e-01   9.8300000e-01
   6.1750000e+00   1.8000000e+01   2.9794371e+04   2.3073360e+03   8.8333510e+03   2.4625100e+02   2.4625100e+02   7.8983600e+02   2.8800000e+02   6.7385300e+02   2.5000000e+00   9.9800000e-01   1.3251000e+01   1.0300000e+00   3.5098000e+01   6.9500000e-01   9.5300000e-01   9.8300000e-01
   7.1480000e+00   2.1000000e+01   3.8980455e+04   2.6780800e+03   9.1349250e+03   3.3206300e+02   3.3206300e+02   8.4438500e+02   2.8800000e+02   6.9760200e+02   2.9610000e+00   9.9800000e-01   1.5551000e+01   1.0350000e+00   4.5122000e+01   8.9300000e-01   9.5300000e-01   9.8300000e-01
   8.2060000e+00   2.4000000e+01   5.0997661e+04   3.0876250e+03   9.3196390e+03   4.3813900e+02   4.3813900e+02   9.4176400e+02   2.8800000e+02   7.3948200e+02   3.5710000e+00   9.9800000e-01   1.8471000e+01   1.0410000e+00   6.1546000e+01   1.2180000e+00   9.5300000e-01   9.8300000e-01
   9.3000000e+00   2.7000000e+01   7.2768895e+04   3.5604180e+03   9.7812460e+03   6.4480800e+02   6.4480800e+02   1.1050780e+03   2.8800000e+02   7.8683900e+02   4.4920000e+00   9.9800000e-01   2.2612000e+01   1.0490000e+00   9.1468000e+01   1.8110000e+00   9.5300000e-01   9.8300000e-01
   1.1380000e+00   3.0000000e+00   4.4532160e+03   1.4160860e+03   6.7413570e+03   1.1523000e+01   1.1523000e+01   5.8041100e+02   2.8800000e+02   5.7054500e+02   1.2580000e+00   9.9800000e-01   6.7980000e+00   1.0190000e+00   0.0000000e+00   2.1300000e-01   9.5300000e-01   9.8400000e-01
   2.0880000e+00   6.0000000e+00   6.0265450e+03   1.3507960e+03   6.8288580e+03   2.3551000e+01   2.3551000e+01   6.0837100e+02   2.8800000e+02   5.7575500e+02   1.2970000e+00   9.9800000e-01   7.0370000e+00   1.0190000e+00   2.2131000e+01   2.6500000e-01   9.5300000e-01   9.8400000e-01
   3.1440000e+00   9.0000000e+00   8.3797830e+03   1.3867610e+03   7.1281240e+03   6.0367000e+01   6.0367000e+01   5.9717500e+02   2.8800000e+02   5.8557100e+02   1.3880000e+00   9.9800000e-01   7.5090000e+00   1.0200000e+00   1.2728000e+01   2.5200000e-01   9.5300000e-01   9.8400000e-01
   4.1610000e+00   1.2000000e+01   1.4724748e+04   1.5474690e+03   7.8037610e+03   1.1377800e+02   1.1377800e+02   6.5200600e+02   2.8800000e+02   6.1171800e+02   1.6560000e+00   9.9800000e-01   8.9280000e+00   1.0220000e+00   1.7669000e+01   3.5000000e-01   9.5300000e-01   9.8400000e-01
   5.1400000e+00   1.5000000e+01   2.1637129e+04   1.9243270e+03   8.5000640e+03   1.7532800e+02   1.7532800e+02   7.2096200e+02   2.8800000e+02   6.4322900e+02   2.0770000e+00   9.9800000e-01   1.1098000e+01   1.0260000e+00   2.5793000e+01   5.1100000e-01   9.5300000e-01   9.8400000e-01
   6.1750000e+00   1.8000000e+01   2.9794639e+04   2.3073220e+03   8.8343830e+03   2.4624800e+02   2.4624800e+02   7.8872800e+02   2.8800000e+02   6.7363000e+02   2.4990000e+00   9.9800000e-01   1.3238000e+01   1.0300000e+00   3.5025000e+01   6.9300000e-01   9.5300000e-01   9.8400000e-01
   7.1480000e+00   2.1000000e+01   3.8980069e+04   2.6780780e+03   9.1354340e+03   3.3213800e+02   3.3213800e+02   8.4335000e+02   2.8800000e+02   6.9743100e+02   2.9600000e+00   9.9800000e-01   1.5534000e+01   1.0350000e+00   4.5041000e+01   8.9200000e-01   9.5300000e-01   9.8400000e-01
   8.2060000e+00   2.4000000e+01   5.0997520e+04   3.0876250e+03   9.3199980e+03   4.3803700e+02   4.3803700e+02   9.4073600e+02   2.8800000e+02   7.3932000e+02   3.5700000e+00   9.9800000e-01   1.8450000e+01   1.0410000e+00   6.1450000e+01   1.2170000e+00   9.5300000e-01   9.8400000e-01
   9.3000000e+00   2.7000000e+01   7.2769513e+04   3.5604260e+03   9.7820130e+03   6.4491700e+02   6.4491700e+02   1.1041920e+03   2.8800000e+02   7.8670000e+02   4.4900000e+00   9.9800000e-01   2.2585000e+01   1.0490000e+00   9.1362000e+01   1.8090000e+00   9.5300000e-01   9.8400000e-01
   1.1380000e+00   3.0000000e+00   5.0319190e+03   1.4114290e+03   6.7411380e+03   1.1245000e+01   1.1245000e+01   5.9621500e+02   2.8800000e+02   5.7276300e+02   1.2760000e+00   9.9800000e-01   6.8980000e+00   1.0190000e+00   0.0000000e+00   2.3300000e-01   9.5300000e-01   9.8500000e-01
   2.0880000e+00   6.0000000e+00   5.8639590e+03   1.3496380e+03   6.8306680e+03   2.3334000e+01   2.3334000e+01   6.0353600e+02   2.8800000e+02   5.7500600e+02   1.2910000e+00   9.9800000e-01   7.0030000e+00   1.0190000e+00   2.2506000e+01   2.6000000e-01   9.5300000e-01   9.8500000e-01
   3.1440000e+00   9.0000000e+00   8.3798620e+03   1.3867610e+03   7.1307100e+03   6.0365000e+01   6.0365000e+01   5.9636000e+02   2.8800000e+02   5.8542200e+02   1.3880000e+00   9.9800000e-01   7.5020000e+00   1.0200000e+00   1.2695000e+01   2.5100000e-01   9.5300000e-01   9.8500000e-01
   4.1610000e+00   1.2000000e+01   1.4724784e+04   1.5474690e+03   7.8057760e+03   1.1380100e+02   1.1380100e+02   6.5112300e+02   2.8800000e+02   6.1155700e+02   1.6560000e+00   9.9800000e-01   8.9190000e+00   1.0220000e+00   1.7626000e+01   3.4900000e-01   9.5300000e-01   9.8500000e-01
   5.1400000e+00   1.5000000e+01   2.1637166e+04   1.9243290e+03   8.5009740e+03   1.7532000e+02   1.7532000e+02   7.1998500e+02   2.8800000e+02   6.4304700e+02   2.0770000e+00   9.9800000e-01   1.1087000e+01   1.0260000e+00   2.5737000e+01   5.0900000e-01   9.5300000e-01   9.8500000e-01
   6.1750000e+00   1.8000000e+01   2.9794922e+04   2.3073110e+03   8.8354150e+03   2.4632500e+02   2.4632500e+02   7.8762400e+02   2.8800000e+02   6.7340900e+02   2.4990000e+00   9.9800000e-01   1.3224000e+01   1.0300000e+00   3.4953000e+01   6.9200000e-01   9.5300000e-01   9.8500000e-01
   7.1480000e+00   2.1000000e+01   3.8979685e+04   2.6780780e+03   9.1359410e+03   3.3211500e+02   3.3211500e+02   8.4231800e+02   2.8800000e+02   6.9726100e+02   2.9590000e+00   9.9800000e-01   1.5517000e+01   1.0350000e+00   4.4960000e+01   8.9000000e-01   9.5300000e-01   9.8500000e-01
   8.2060000e+00   2.4000000e+01   5.0997436e+04   3.0876220e+03   9.3203570e+03   4.3799200e+02   4.3799200e+02   9.3971200e+02   2.8800000e+02   7.3915900e+02   3.5700000e+00   9.9800000e-01   1.8429000e+01   1.0410000e+00   6.1354000e+01   1.2150000e+00   9.5300000e-01   9.8500000e-01
   9.3000000e+00   2.7000000e+01   7.2770231e+04   3.5604250e+03   9.7827760e+03   6.4489100e+02   6.4489100e+02   1.1033080e+03   2.8800000e+02   7.8656100e+02   4.4890000e+00   9.9800000e-01   2.2557000e+01   1.0490000e+00   9.1258000e+01   1.8060000e+00   9.5300000e-01   9.8500000e-01
   1.1380000e+00   3.0000000e+00   5.5869890e+03   1.4058110e+03   6.7404030e+03   1.0906000e+01   1.0906000e+01   6.1129400e+02   2.8800000e+02   5.7468100e+02   1.2920000e+00   9.9800000e-01   6.9850000e+00   1.0190000e+00   0.0000000e+00   2.5100000e-01   9.5300000e-01   9.8600000e-01
   2.0880000e+00   6.0000000e+00   5.7230410e+03   1.3486610e+03   6.8325870e+03   2.3155000e+01   2.3155000e+01   5.9912000e+02   2.8800000e+02   5.7427100e+02   1.2870000e+00   9.9800000e-01   6.9690000e+00   1.0190000e+00   2.2538000e+01   2.5500000e-01   9.5300000e-01   9.8600000e-01
   3.1440000e+00   9.0000000e+00   8.3800090e+03   1.3867620e+03   7.1333010e+03   6.0370000e+01   6.0370000e+01   5.9554600e+02   2.8800000e+02   5.8527400e+02   1.3880000e+00   9.9800000e-01   7.4950000e+00   1.0200000e+00   1.2661000e+01   2.5100000e-01   9.5300000e-01   9.8600000e-01
   4.1610000e+00   1.2000000e+01   1.4724779e+04   1.5474700e+03   7.8077910e+03   1.1380400e+02   1.1380400e+02   6.5024200e+02   2.8800000e+02   6.1139600e+02   1.6560000e+00   9.9800000e-01   8.9100000e+00   1.0220000e+00   1.7584000e+01   3.4800000e-01   9.5300000e-01   9.8600000e-01
   5.1400000e+00   1.5000000e+01   2.1637345e+04   1.9243310e+03   8.5018890e+03   1.7531900e+02   1.7531900e+02   7.1901200e+02   2.8800000e+02   6.4286600e+02   2.0760000e+00   9.9800000e-01   1.1075000e+01   1.0260000e+00   2.5681000e+01   5.0800000e-01   9.5300000e-01   9.8600000e-01
   6.1750000e+00   1.8000000e+01   2.9795234e+04   2.3073010e+03   8.8364490e+03   2.4626400e+02   2.4626400e+02   7.8652300e+02   2.8800000e+02   6.7318800e+02   2.4990000e+00   9.9800000e-01   1.3210000e+01   1.0300000e+00   3.4881000e+01   6.9100000e-01   9.5300000e-01   9.8600000e-01
   7.1480000e+00   2.1000000e+01   3.8979346e+04   2.6780760e+03   9.1364490e+03   3.3210000e+02   3.3210000e+02   8.4128800e+02   2.8800000e+02   6.9709100e+02   2.9590000e+00   9.9800000e-01   1.5500000e+01   1.0350000e+00   4.4879000e+01   8.8900000e-01   9.5300000e-01   9.8600000e-01
   8.2060000e+00   2.4000000e+01   5.0997315e+04   3.0876200e+03   9.3207150e+03   4.3813700e+02   4.3813700e+02   9.3869000e+02   2.8800000e+02   7.3899900e+02   3.5690000e+00   9.9800000e-01   1.8408000e+01   1.0410000e+00   6.1258000e+01   1.2130000e+00   9.5300000e-01   9.8600000e-01
   9.3000000e+00   2.7000000e+01   7.2771707e+04   3.5604220e+03   9.7835450e+03   6.4513100e+02   6.4513100e+02   1.1024310e+03   2.8800000e+02   7.8642400e+02   4.4880000e+00   9.9800000e-01   2.2530000e+01   1.0490000e+00   9.1154000e+01   1.8040000e+00   9.5300000e-01   9.8600000e-01
   1.1380000e+00   3.0000000e+00   6.9068020e+03   1.3864050e+03   6.7314010e+03   9.7520000e+00   9.7520000e+00   6.4917700e+02   2.8800000e+02   5.7901000e+02   1.3260000e+00   9.9800000e-01   7.1860000e+00   1.0190000e+00   0.0000000e+00   2.9800000e-01   9.5300000e-01   9.8700000e-01
   2.0880000e+00   6.0000000e+00   5.5561190e+03   1.3474570e+03   6.8344090e+03   2.2936000e+01   2.2936000e+01   5.9419500e+02   2.8800000e+02   5.7350000e+02   1.2810000e+00   9.9800000e-01   6.9340000e+00   1.0190000e+00   2.2988000e+01   2.5000000e-01   9.5300000e-01   9.8700000e-01
   3.1440000e+00   9.0000000e+00   8.3800770e+03   1.3867620e+03   7.1358880e+03   6.0371000e+01   6.0371000e+01   5.9473400e+02   2.8800000e+02   5.8512500e+02   1.3880000e+00   9.9800000e-01   7.4870000e+00   1.0200000e+00   1.2627000e+01   2.5000000e-01   9.5300000e-01   9.8700000e-01
   4.1610000e+00   1.2000000e+01   1.4724999e+04   1.5474710e+03   7.8098260e+03   1.1378000e+02   1.1378000e+02   6.4936400e+02   2.8800000e+02   6.1123600e+02   1.6560000e+00   9.9800000e-01   8.9010000e+00   1.0220000e+00   1.7542000e+01   3.4700000e-01   9.5300000e-01   9.8700000e-01
   5.1400000e+00   1.5000000e+01   2.1637566e+04   1.9243330e+03   8.5028040e+03   1.7531800e+02   1.7531800e+02   7.1804100e+02   2.8800000e+02   6.4268500e+02   2.0760000e+00   9.9800000e-01   1.1064000e+01   1.0260000e+00   2.5625000e+01   5.0700000e-01   9.5300000e-01   9.8700000e-01
   6.1750000e+00   1.8000000e+01   2.9795562e+04   2.3072930e+03   8.8374840e+03   2.4633700e+02   2.4633700e+02   7.8542600e+02   2.8800000e+02   6.7296800e+02   2.4980000e+00   9.9800000e-01   1.3197000e+01   1.0300000e+00   3.4809000e+01   6.8900000e-01   9.5300000e-01   9.8700000e-01
   7.1480000e+00   2.1000000e+01   3.8978949e+04   2.6780780e+03   9.1369560e+03   3.3210200e+02   3.3210200e+02   8.4026100e+02   2.8800000e+02   6.9692200e+02   2.9580000e+00   9.9800000e-01   1.5483000e+01   1.0350000e+00   4.4798000e+01   8.8700000e-01   9.5300000e-01   9.8700000e-01
   8.2060000e+00   2.4000000e+01   5.0997220e+04   3.0876170e+03   9.3210720e+03   4.3813500e+02   4.3813500e+02   9.3767200e+02   2.8800000e+02   7.3883900e+02   3.5680000e+00   9.9800000e-01   1.8387000e+01   1.0410000e+00   6.1162000e+01   1.2110000e+00   9.5300000e-01   9.8700000e-01
   9.3000000e+00   2.7000000e+01   7.2772009e+04   3.5604270e+03   9.7842950e+03   6.4479700e+02   6.4479700e+02   1.1015490e+03   2.8800000e+02   7.8628700e+02   4.4870000e+00   9.9800000e-01   2.2503000e+01   1.0490000e+00   9.1049000e+01   1.8020000e+00   9.5300000e-01   9.8700000e-01
   1.1380000e+00   3.0000000e+00   7.4157140e+03   1.3660900e+03   6.7213550e+03   8.5650000e+00   8.5650000e+00   6.6774500e+02   2.8800000e+02   5.8006800e+02   1.3340000e+00   9.9800000e-01   7.2370000e+00   1.0190000e+00   9.7460000e+00   3.2800000e-01   9.5300000e-01   9.8800000e-01
   2.0880000e+00   6.0000000e+00   5.1954170e+03   1.3457300e+03   6.8358580e+03   2.2626000e+01   2.2626000e+01   5.8391200e+02   2.8800000e+02   5.7192000e+02   1.2700000e+00   9.9800000e-01   6.8630000e+00   1.0190000e+00   2.3197000e+01   2.3800000e-01   9.5300000e-01   9.8800000e-01
   3.1440000e+00   9.0000000e+00   8.3801660e+03   1.3867630e+03   7.1384760e+03   6.0364000e+01   6.0364000e+01   5.9392400e+02   2.8800000e+02   5.8497600e+02   1.3880000e+00   9.9800000e-01   7.4800000e+00   1.0200000e+00   1.2593000e+01   2.4900000e-01   9.5300000e-01   9.8800000e-01
   4.1610000e+00   1.2000000e+01   1.4725046e+04   1.5474720e+03   7.8118490e+03   1.1379400e+02   1.1379400e+02   6.4848800e+02   2.8800000e+02   6.1107500e+02   1.6550000e+00   9.9800000e-01   8.8920000e+00   1.0220000e+00   1.7500000e+01   3.4600000e-01   9.5300000e-01   9.8800000e-01
   5.1400000e+00   1.5000000e+01   2.1637642e+04   1.9243350e+03   8.5037160e+03   1.7530300e+02   1.7530300e+02   7.1707200e+02   2.8800000e+02   6.4250500e+02   2.0760000e+00   9.9800000e-01   1.1053000e+01   1.0260000e+00   2.5570000e+01   5.0600000e-01   9.5300000e-01   9.8800000e-01
   6.1750000e+00   1.8000000e+01   2.9795958e+04   2.3072880e+03   8.8385230e+03   2.4628200e+02   2.4628200e+02   7.8433100e+02   2.8800000e+02   6.7274900e+02   2.4980000e+00   9.9800000e-01   1.3183000e+01   1.0300000e+00   3.4738000e+01   6.8800000e-01   9.5300000e-01   9.8800000e-01
   7.1480000e+00   2.1000000e+01   3.8978650e+04   2.6780750e+03   9.1374630e+03   3.3214000e+02   3.3214000e+02   8.3923800e+02   2.8800000e+02   6.9675300e+02   2.9580000e+00   9.9800000e-01   1.5466000e+01   1.0350000e+00   4.4718000e+01   8.8500000e-01   9.5300000e-01   9.8800000e-01
   8.2060000e+00   2.4000000e+01   5.0997095e+04   3.0876160e+03   9.3214290e+03   4.3806200e+02   4.3806200e+02   9.3665700e+02   2.8800000e+02   7.3868000e+02   3.5670000e+00   9.9800000e-01   1.8365000e+01   1.0410000e+00   6.1067000e+01   1.2090000e+00   9.5300000e-01   9.8800000e-01
   9.3000000e+00   2.7000000e+01   7.2772545e+04   3.5604320e+03   9.7850440e+03   6.4479100e+02   6.4479100e+02   1.1006720e+03   2.8800000e+02   7.8615100e+02   4.4850000e+00   9.9800000e-01   2.2477000e+01   1.0490000e+00   9.0944000e+01   1.8000000e+00   9.5300000e-01   9.8800000e-01
   1.1380000e+00   3.0000000e+00   6.9738260e+03   1.3378750e+03   6.7058660e+03   6.9650000e+00   6.9650000e+00   6.6260700e+02   2.8800000e+02   5.7786300e+02   1.3140000e+00   9.9800000e-01   7.1320000e+00   1.0190000e+00   2.3789000e+01   3.3000000e-01   9.5300000e-01   9.8900000e-01
   2.0880000e+00   6.0000000e+00   5.2842360e+03   1.3461830e+03   6.8386680e+03   2.2711000e+01   2.2711000e+01   5.8553700e+02   2.8800000e+02   5.7219600e+02   1.2730000e+00   9.9800000e-01   6.8760000e+00   1.0190000e+00   2.3359000e+01   2.4000000e-01   9.5300000e-01   9.8900000e-01
   3.1440000e+00   9.0000000e+00   8.3803160e+03   1.3867640e+03   7.1410700e+03   6.0361000e+01   6.0361000e+01   5.9311500e+02   2.8800000e+02   5.8482800e+02   1.3880000e+00   9.9800000e-01   7.4730000e+00   1.0200000e+00   1.2560000e+01   2.4900000e-01   9.5300000e-01   9.8900000e-01
   4.1610000e+00   1.2000000e+01   1.4725056e+04   1.5474720e+03   7.8138700e+03   1.1380800e+02   1.1380800e+02   6.4761300e+02   2.8800000e+02   6.1091500e+02   1.6550000e+00   9.9800000e-01   8.8830000e+00   1.0220000e+00   1.7458000e+01   3.4600000e-01   9.5300000e-01   9.8900000e-01
   5.1400000e+00   1.5000000e+01   2.1637769e+04   1.9243370e+03   8.5046300e+03   1.7530700e+02   1.7530700e+02   7.1610500e+02   2.8800000e+02   6.4232400e+02   2.0750000e+00   9.9800000e-01   1.1041000e+01   1.0260000e+00   2.5514000e+01   5.0500000e-01   9.5300000e-01   9.8900000e-01
   6.1750000e+00   1.8000000e+01   2.9796193e+04   2.3072760e+03   8.8395520e+03   2.4633300e+02   2.4633300e+02   7.8324100e+02   2.8800000e+02   6.7253000e+02   2.4980000e+00   9.9800000e-01   1.3170000e+01   1.0300000e+00   3.4666000e+01   6.8600000e-01   9.5300000e-01   9.8900000e-01
   7.1480000e+00   2.1000000e+01   3.8978325e+04   2.6780760e+03   9.1379690e+03   3.3217000e+02   3.3217000e+02   8.3821700e+02   2.8800000e+02   6.9658500e+02   2.9570000e+00   9.9800000e-01   1.5449000e+01   1.0350000e+00   4.4638000e+01   8.8400000e-01   9.5300000e-01   9.8900000e-01
   8.2060000e+00   2.4000000e+01   5.0996966e+04   3.0876140e+03   9.3217850e+03   4.3801500e+02   4.3801500e+02   9.3564400e+02   2.8800000e+02   7.3852100e+02   3.5660000e+00   9.9800000e-01   1.8344000e+01   1.0410000e+00   6.0972000e+01   1.2070000e+00   9.5300000e-01   9.8900000e-01
   9.3000000e+00   2.7000000e+01   7.2774047e+04   3.5604260e+03   9.7858000e+03   6.4503100e+02   6.4503100e+02   1.0998020e+03   2.8800000e+02   7.8601700e+02   4.4840000e+00   9.9800000e-01   2.2450000e+01   1.0490000e+00   9.0841000e+01   1.7980000e+00   9.5300000e-01   9.8900000e-01
   1.1380000e+00   3.0000000e+00   5.8577530e+03   1.3209130e+03   6.6969070e+03   6.0260000e+00   6.0260000e+00   6.3661200e+02   2.8800000e+02   5.7342800e+02   1.2780000e+00   9.9800000e-01   6.9260000e+00   1.0190000e+00   3.0344000e+01   3.0300000e-01   9.5300000e-01   9.9000000e-01
   2.0880000e+00   6.0000000e+00   4.7640190e+03   1.3445030e+03   6.8401530e+03   2.2389000e+01   2.2389000e+01   5.7099000e+02   2.8800000e+02   5.7011700e+02   1.2560000e+00   9.9800000e-01   6.7830000e+00   1.0190000e+00   2.3433000e+01   2.2300000e-01   9.5300000e-01   9.9000000e-01
   3.1440000e+00   9.0000000e+00   8.3803800e+03   1.3867640e+03   7.1436580e+03   6.0369000e+01   6.0369000e+01   5.9230800e+02   2.8800000e+02   5.8467900e+02   1.3870000e+00   9.9800000e-01   7.4660000e+00   1.0200000e+00   1.2526000e+01   2.4800000e-01   9.5300000e-01   9.9000000e-01
   4.1610000e+00   1.2000000e+01   1.4725139e+04   1.5474730e+03   7.8158990e+03   1.1380900e+02   1.1380900e+02   6.4674100e+02   2.8800000e+02   6.1075600e+02   1.6550000e+00   9.9800000e-01   8.8740000e+00   1.0220000e+00   1.7416000e+01   3.4500000e-01   9.5300000e-01   9.9000000e-01
   5.1400000e+00   1.5000000e+01   2.1638087e+04   1.9243380e+03   8.5055490e+03   1.7531500e+02   1.7531500e+02   7.1514300e+02   2.8800000e+02   6.4214500e+02   2.0750000e+00   9.9800000e-01   1.1030000e+01   1.0260000e+00   2.5459000e+01   5.0400000e-01   9.5300000e-01   9.9000000e-01
   6.1750000e+00   1.8000000e+01   2.9796494e+04   2.3072690e+03   8.8405850e+03   2.4634800e+02   2.4634800e+02   7.8215400e+02   2.8800000e+02   6.7231100e+02   2.4970000e+00   9.9800000e-01   1.3156000e+01   1.0300000e+00   3.4595000e+01   6.8500000e-01   9.5300000e-01   9.9000000e-01
   7.1480000e+00   2.1000000e+01   3.8977997e+04   2.6780760e+03   9.1384760e+03   3.3216700e+02   3.3216700e+02   8.3719800e+02   2.8800000e+02   6.9641700e+02   2.9560000e+00   9.9800000e-01   1.5433000e+01   1.0350000e+00   4.4558000e+01   8.8200000e-01   9.5300000e-01   9.9000000e-01
   8.2060000e+00   2.4000000e+01   5.0996892e+04   3.0876110e+03   9.3221410e+03   4.3801800e+02   4.3801800e+02   9.3463500e+02   2.8800000e+02   7.3836300e+02   3.5650000e+00   9.9800000e-01   1.8323000e+01   1.0410000e+00   6.0877000e+01   1.2050000e+00   9.5300000e-01   9.9000000e-01
   9.3000000e+00   2.7000000e+01   7.2774657e+04   3.5604330e+03   9.7865440e+03   6.4486700e+02   6.4486700e+02   1.0989300e+03   2.8800000e+02   7.8588200e+02   4.4830000e+00   9.9800000e-01   2.2423000e+01   1.0490000e+00   9.0737000e+01   1.7960000e+00   9.5300000e-01   9.9000000e-01
   1.1380000e+00   3.0000000e+00   4.5393650e+03   1.3115820e+03   6.6923720e+03   5.5180000e+00   5.5180000e+00   6.0300100e+02   2.8800000e+02   5.6830800e+02   1.2380000e+00   9.9800000e-01   6.6980000e+00   1.0190000e+00   3.3182000e+01   2.6500000e-01   9.5300000e-01   9.9100000e-01
   2.0880000e+00   6.0000000e+00   4.7238220e+03   1.3446550e+03   6.8427650e+03   2.2419000e+01   2.2419000e+01   5.6907200e+02   2.8800000e+02   5.6961700e+02   1.2550000e+00   9.9800000e-01   6.7610000e+00   1.0190000e+00   2.3318000e+01   2.2100000e-01   9.5300000e-01   9.9100000e-01
   3.1440000e+00   9.0000000e+00   8.3804950e+03   1.3867650e+03   7.1462510e+03   6.0369000e+01   6.0369000e+01   5.9150300e+02   2.8800000e+02   5.8453100e+02   1.3870000e+00   9.9800000e-01   7.4590000e+00   1.0200000e+00   1.2493000e+01   2.4700000e-01   9.5300000e-01   9.9100000e-01
   4.1610000e+00   1.2000000e+01   1.4725273e+04   1.5474730e+03   7.8179340e+03   1.1380800e+02   1.1380800e+02   6.4587200e+02   2.8800000e+02   6.1059600e+02   1.6550000e+00   9.9800000e-01   8.8660000e+00   1.0220000e+00   1.7374000e+01   3.4400000e-01   9.5300000e-01   9.9100000e-01
   5.1400000e+00   1.5000000e+01   2.1638392e+04   1.9243400e+03   8.5064690e+03   1.7532900e+02   1.7532900e+02   7.1418200e+02   2.8800000e+02   6.4196600e+02   2.0750000e+00   9.9800000e-01   1.1019000e+01   1.0260000e+00   2.5404000e+01   5.0300000e-01   9.5300000e-01   9.9100000e-01
   6.1750000e+00   1.8000000e+01   2.9796746e+04   2.3072600e+03   8.8416150e+03   2.4629800e+02   2.4629800e+02   7.8107000e+02   2.8800000e+02   6.7209300e+02   2.4970000e+00   9.9800000e-01   1.3143000e+01   1.0300000e+00   3.4524000e+01   6.8400000e-01   9.5300000e-01   9.9100000e-01
   7.1480000e+00   2.1000000e+01   3.8977624e+04   2.6780760e+03   9.1389810e+03   3.3202800e+02   3.3202800e+02   8.3618300e+02   2.8800000e+02   6.9625000e+02   2.9560000e+00   9.9800000e-01   1.5416000e+01   1.0350000e+00   4.4478000e+01   8.8100000e-01   9.5300000e-01   9.9100000e-01
   8.2060000e+00   2.4000000e+01   5.0996790e+04   3.0876080e+03   9.3224960e+03   4.3802100e+02   4.3802100e+02   9.3362900e+02   2.8800000e+02   7.3820600e+02   3.5640000e+00   9.9800000e-01   1.8302000e+01   1.0410000e+00   6.0783000e+01   1.2030000e+00   9.5300000e-01   9.9100000e-01
   9.3000000e+00   2.7000000e+01   7.2774824e+04   3.5604390e+03   9.7872760e+03   6.4496100e+02   6.4496100e+02   1.0980580e+03   2.8800000e+02   7.8574800e+02   4.4820000e+00   9.9800000e-01   2.2396000e+01   1.0490000e+00   9.0633000e+01   1.7940000e+00   9.5300000e-01   9.9100000e-01
   1.1380000e+00   3.0000000e+00   2.3417020e+03   1.3087780e+03   6.6907130e+03   5.3480000e+00   5.3480000e+00   5.3976200e+02   2.8800000e+02   5.5871300e+02   1.1670000e+00   9.9800000e-01   6.2930000e+00   1.0190000e+00   3.1173000e+01   1.9100000e-01   9.5300000e-01   9.9200000e-01
   2.0880000e+00   6.0000000e+00   4.5130130e+03   1.3444070e+03   6.8452130e+03   2.2374000e+01   2.2374000e+01   5.6249700e+02   2.8800000e+02   5.6862700e+02   1.2480000e+00   9.9800000e-01   6.7180000e+00   1.0190000e+00   2.3276000e+01   2.1300000e-01   9.5300000e-01   9.9200000e-01
   3.1440000e+00   9.0000000e+00   8.3805770e+03   1.3867650e+03   7.1488420e+03   6.0364000e+01   6.0364000e+01   5.9069900e+02   2.8800000e+02   5.8438300e+02   1.3870000e+00   9.9800000e-01   7.4510000e+00   1.0200000e+00   1.2459000e+01   2.4700000e-01   9.5300000e-01   9.9200000e-01
   4.1610000e+00   1.2000000e+01   1.4725298e+04   1.5474740e+03   7.8199610e+03   1.1381100e+02   1.1381100e+02   6.4500400e+02   2.8800000e+02   6.1043700e+02   1.6550000e+00   9.9800000e-01   8.8570000e+00   1.0220000e+00   1.7333000e+01   3.4300000e-01   9.5300000e-01   9.9200000e-01
   5.1400000e+00   1.5000000e+01   2.1638608e+04   1.9243410e+03   8.5073850e+03   1.7530500e+02   1.7530500e+02   7.1322400e+02   2.8800000e+02   6.4178700e+02   2.0750000e+00   9.9800000e-01   1.1008000e+01   1.0260000e+00   2.5349000e+01   5.0200000e-01   9.5300000e-01   9.9200000e-01
   6.1750000e+00   1.8000000e+01   2.9797053e+04   2.3072550e+03   8.8426490e+03   2.4636200e+02   2.4636200e+02   7.7998900e+02   2.8800000e+02   6.7187600e+02   2.4970000e+00   9.9800000e-01   1.3129000e+01   1.0300000e+00   3.4453000e+01   6.8200000e-01   9.5300000e-01   9.9200000e-01
   7.1480000e+00   2.1000000e+01   3.8977333e+04   2.6780750e+03   9.1394870e+03   3.3206500e+02   3.3206500e+02   8.3517000e+02   2.8800000e+02   6.9608300e+02   2.9550000e+00   9.9800000e-01   1.5399000e+01   1.0350000e+00   4.4398000e+01   8.7900000e-01   9.5300000e-01   9.9200000e-01
   8.2060000e+00   2.4000000e+01   5.0996151e+04   3.0875990e+03   9.3228650e+03   4.3809900e+02   4.3809900e+02   9.3260800e+02   2.8800000e+02   7.3805000e+02   3.5630000e+00   9.9800000e-01   1.8282000e+01   1.0410000e+00   6.0686000e+01   1.2010000e+00   9.5300000e-01   9.9200000e-01
   9.3000000e+00   2.7000000e+01   7.2775436e+04   3.5604370e+03   9.7880090e+03   6.4484100e+02   6.4484100e+02   1.0971900e+03   2.8800000e+02   7.8561500e+02   4.4810000e+00   9.9800000e-01   2.2369000e+01   1.0490000e+00   9.0530000e+01   1.7920000e+00   9.5300000e-01   9.9200000e-01
   1.1380000e+00   3.0000000e+00   1.0931780e+03   1.3163200e+03   6.6963880e+03   5.7450000e+00   5.7450000e+00   4.9612600e+02   2.8800000e+02   5.5222600e+02   1.1240000e+00   9.9800000e-01   6.0360000e+00   1.0190000e+00   2.4886000e+01   1.3700000e-01   9.5300000e-01   9.9300000e-01
   2.0880000e+00   6.0000000e+00   4.4636680e+03   1.3443960e+03   6.8477470e+03   2.2365000e+01   2.2365000e+01   5.6039000e+02   2.8800000e+02   5.6829800e+02   1.2470000e+00   9.9800000e-01   6.7040000e+00   1.0190000e+00   2.3207000e+01   2.1100000e-01   9.5300000e-01   9.9300000e-01
   3.1440000e+00   9.0000000e+00   8.3806980e+03   1.3867660e+03   7.1514360e+03   6.0373000e+01   6.0373000e+01   5.8989700e+02   2.8800000e+02   5.8423500e+02   1.3870000e+00   9.9800000e-01   7.4440000e+00   1.0200000e+00   1.2426000e+01   2.4600000e-01   9.5300000e-01   9.9300000e-01
   4.1610000e+00   1.2000000e+01   1.4725470e+04   1.5474750e+03   7.8220020e+03   1.1381100e+02   1.1381100e+02   6.4413900e+02   2.8800000e+02   6.1027900e+02   1.6540000e+00   9.9800000e-01   8.8480000e+00   1.0220000e+00   1.7291000e+01   3.4200000e-01   9.5300000e-01   9.9300000e-01
   5.1400000e+00   1.5000000e+01   2.1638523e+04   1.9243440e+03   8.5082940e+03   1.7533700e+02   1.7533700e+02   7.1226600e+02   2.8800000e+02   6.4160800e+02   2.0740000e+00   9.9800000e-01   1.0997000e+01   1.0260000e+00   2.5293000e+01   5.0100000e-01   9.5300000e-01   9.9300000e-01
   6.1750000e+00   1.8000000e+01   2.9797301e+04   2.3072470e+03   8.8436790e+03   2.4628600e+02   2.4628600e+02   7.7891100e+02   2.8800000e+02   6.7166000e+02   2.4960000e+00   9.9800000e-01   1.3116000e+01   1.0300000e+00   3.4382000e+01   6.8100000e-01   9.5300000e-01   9.9300000e-01
   7.1480000e+00   2.1000000e+01   3.8977006e+04   2.6780760e+03   9.1399920e+03   3.3209900e+02   3.3209900e+02   8.3416000e+02   2.8800000e+02   6.9591600e+02   2.9550000e+00   9.9800000e-01   1.5382000e+01   1.0350000e+00   4.4319000e+01   8.7700000e-01   9.5300000e-01   9.9300000e-01
   8.2060000e+00   2.4000000e+01   5.0995395e+04   3.0875800e+03   9.3232570e+03   4.3799200e+02   4.3799200e+02   9.3158200e+02   2.8800000e+02   7.3789600e+02   3.5620000e+00   9.9800000e-01   1.8261000e+01   1.0410000e+00   6.0590000e+01   1.2000000e+00   9.5300000e-01   9.9300000e-01
   9.3000000e+00   2.7000000e+01   7.2776400e+04   3.5604390e+03   9.7887450e+03   6.4507000e+02   6.4507000e+02   1.0963270e+03   2.8800000e+02   7.8548300e+02   4.4790000e+00   9.9800000e-01   2.2343000e+01   1.0490000e+00   9.0427000e+01   1.7900000e+00   9.5300000e-01   9.9300000e-01
   1.1380000e+00   3.0000000e+00   5.1121400e+02   1.3248530e+03   6.7034410e+03   6.1950000e+00   6.1950000e+00   4.7121800e+02   2.8800000e+02   5.4873500e+02   1.1020000e+00   9.9800000e-01   5.9020000e+00   1.0190000e+00   1.8910000e+01   1.0500000e-01   9.5300000e-01   9.9400000e-01
   2.0880000e+00   6.0000000e+00   4.0948150e+03   1.3450110e+03   6.8505850e+03   2.2464000e+01   2.2464000e+01   5.4906400e+02   2.8800000e+02   5.6661700e+02   1.2350000e+00   9.9800000e-01   6.6310000e+00   1.0190000e+00   2.2288000e+01   1.9700000e-01   9.5300000e-01   9.9400000e-01
   3.1440000e+00   9.0000000e+00   8.3807780e+03   1.3867670e+03   7.1540280e+03   6.0376000e+01   6.0376000e+01   5.8909700e+02   2.8800000e+02   5.8408700e+02   1.3870000e+00   9.9800000e-01   7.4370000e+00   1.0200000e+00   1.2393000e+01   2.4500000e-01   9.5300000e-01   9.9400000e-01
   4.1610000e+00   1.2000000e+01   1.4725496e+04   1.5474750e+03   7.8240340e+03   1.1381200e+02   1.1381200e+02   6.4327500e+02   2.8800000e+02   6.1012000e+02   1.6540000e+00   9.9800000e-01   8.8390000e+00   1.0220000e+00   1.7249000e+01   3.4100000e-01   9.5300000e-01   9.9400000e-01
   5.1400000e+00   1.5000000e+01   2.1638729e+04   1.9243460e+03   8.5092110e+03   1.7535100e+02   1.7535100e+02   7.1131300e+02   2.8800000e+02   6.4143000e+02   2.0740000e+00   9.9800000e-01   1.0986000e+01   1.0260000e+00   2.5239000e+01   5.0000000e-01   9.5300000e-01   9.9400000e-01
   6.1750000e+00   1.8000000e+01   2.9797479e+04   2.3072390e+03   8.8447050e+03   2.4628400e+02   2.4628400e+02   7.7783700e+02   2.8800000e+02   6.7144300e+02   2.4960000e+00   9.9800000e-01   1.3102000e+01   1.0300000e+00   3.4312000e+01   6.7900000e-01   9.5300000e-01   9.9400000e-01
   7.1480000e+00   2.1000000e+01   3.8976773e+04   2.6780760e+03   9.1404980e+03   3.3204500e+02   3.3204500e+02   8.3315300e+02   2.8800000e+02   6.9575000e+02   2.9540000e+00   9.9800000e-01   1.5366000e+01   1.0350000e+00   4.4239000e+01   8.7600000e-01   9.5300000e-01   9.9400000e-01
   8.2060000e+00   2.4000000e+01   5.0995069e+04   3.0875690e+03   9.3236550e+03   4.3809900e+02   4.3809900e+02   9.3056200e+02   2.8800000e+02   7.3774400e+02   3.5620000e+00   9.9800000e-01   1.8241000e+01   1.0410000e+00   6.0495000e+01   1.1980000e+00   9.5300000e-01   9.9400000e-01
   9.3000000e+00   2.7000000e+01   7.2777346e+04   3.5604390e+03   9.7894760e+03   6.4512100e+02   6.4512100e+02   1.0954660e+03   2.8800000e+02   7.8535200e+02   4.4780000e+00   9.9800000e-01   2.2316000e+01   1.0490000e+00   9.0325000e+01   1.7880000e+00   9.5300000e-01   9.9400000e-01
   1.1380000e+00   3.0000000e+00   2.6873800e+02   1.3362310e+03   6.7128940e+03   6.8070000e+00   6.8070000e+00   4.5561400e+02   2.8800000e+02   5.4695500e+02   1.0930000e+00   9.9800000e-01   5.8360000e+00   1.0190000e+00   1.2542000e+01   8.2000000e-02   9.5300000e-01   9.9500000e-01
   2.0880000e+00   6.0000000e+00   4.2876250e+03   1.3447400e+03   6.8530350e+03   2.2421000e+01   2.2421000e+01   5.5377700e+02   2.8800000e+02   5.6726100e+02   1.2410000e+00   9.9800000e-01   6.6590000e+00   1.0190000e+00   2.2766000e+01   2.0300000e-01   9.5300000e-01   9.9500000e-01
   3.1440000e+00   9.0000000e+00   8.3809260e+03   1.3867670e+03   7.1566260e+03   6.0375000e+01   6.0375000e+01   5.8829800e+02   2.8800000e+02   5.8393900e+02   1.3870000e+00   9.9800000e-01   7.4300000e+00   1.0200000e+00   1.2359000e+01   2.4500000e-01   9.5300000e-01   9.9500000e-01
   4.1610000e+00   1.2000000e+01   1.4725644e+04   1.5474760e+03   7.8260760e+03   1.1381500e+02   1.1381500e+02   6.4241500e+02   2.8800000e+02   6.0996200e+02   1.6540000e+00   9.9800000e-01   8.8300000e+00   1.0220000e+00   1.7208000e+01   3.4100000e-01   9.5300000e-01   9.9500000e-01
   5.1400000e+00   1.5000000e+01   2.1638763e+04   1.9243470e+03   8.5101240e+03   1.7531200e+02   1.7531200e+02   7.1036000e+02   2.8800000e+02   6.4125200e+02   2.0740000e+00   9.9800000e-01   1.0974000e+01   1.0260000e+00   2.5184000e+01   4.9900000e-01   9.5300000e-01   9.9500000e-01
   6.1750000e+00   1.8000000e+01   2.9797662e+04   2.3072310e+03   8.8457320e+03   2.4629100e+02   2.4629100e+02   7.7676600e+02   2.8800000e+02   6.7122800e+02   2.4960000e+00   9.9800000e-01   1.3089000e+01   1.0300000e+00   3.4241000e+01   6.7800000e-01   9.5300000e-01   9.9500000e-01
   7.1480000e+00   2.1000000e+01   3.8976439e+04   2.6780780e+03   9.1410030e+03   3.3209200e+02   3.3209200e+02   8.3214800e+02   2.8800000e+02   6.9558500e+02   2.9530000e+00   9.9800000e-01   1.5349000e+01   1.0350000e+00   4.4160000e+01   8.7400000e-01   9.5300000e-01   9.9500000e-01
   8.2060000e+00   2.4000000e+01   5.0994936e+04   3.0875610e+03   9.3240550e+03   4.3811000e+02   4.3811000e+02   9.2954500e+02   2.8800000e+02   7.3759300e+02   3.5610000e+00   9.9800000e-01   1.8220000e+01   1.0410000e+00   6.0400000e+01   1.1960000e+00   9.5300000e-01   9.9500000e-01
   9.3000000e+00   2.7000000e+01   7.2778649e+04   3.5604350e+03   9.7902080e+03   6.4511300e+02   6.4511300e+02   1.0946090e+03   2.8800000e+02   7.8522200e+02   4.4770000e+00   9.9800000e-01   2.2290000e+01   1.0490000e+00   9.0223000e+01   1.7860000e+00   9.5300000e-01   9.9500000e-01
   1.1380000e+00   3.0000000e+00   3.5449100e+02   1.3511430e+03   6.7251510e+03   7.6370000e+00   7.6370000e+00   4.5050700e+02   2.8800000e+02   5.4729000e+02   1.0980000e+00   9.9800000e-01   5.8490000e+00   1.0190000e+00   3.9630000e+00   7.0000000e-02   9.5300000e-01   9.9600000e-01
   2.0880000e+00   6.0000000e+00   3.9664440e+03   1.3455750e+03   6.8560120e+03   2.2566000e+01   2.2566000e+01   5.4363600e+02   2.8800000e+02   5.6571200e+02   1.2310000e+00   9.9800000e-01   6.5930000e+00   1.0190000e+00   2.1965000e+01   1.9100000e-01   9.5300000e-01   9.9600000e-01
   3.1440000e+00   9.0000000e+00   8.3809850e+03   1.3867680e+03   7.1592180e+03   6.0374000e+01   6.0374000e+01   5.8750100e+02   2.8800000e+02   5.8379200e+02   1.3870000e+00   9.9800000e-01   7.4230000e+00   1.0200000e+00   1.2326000e+01   2.4400000e-01   9.5300000e-01   9.9600000e-01
   4.1610000e+00   1.2000000e+01   1.4725665e+04   1.5474770e+03   7.8281100e+03   1.1380900e+02   1.1380900e+02   6.4155500e+02   2.8800000e+02   6.0980400e+02   1.6540000e+00   9.9800000e-01   8.8210000e+00   1.0220000e+00   1.7166000e+01   3.4000000e-01   9.5300000e-01   9.9600000e-01
   5.1400000e+00   1.5000000e+01   2.1639173e+04   1.9243490e+03   8.5110470e+03   1.7530600e+02   1.7530600e+02   7.0941300e+02   2.8800000e+02   6.4107500e+02   2.0730000e+00   9.9800000e-01   1.0963000e+01   1.0260000e+00   2.5129000e+01   4.9700000e-01   9.5300000e-01   9.9600000e-01
   6.1750000e+00   1.8000000e+01   2.9797861e+04   2.3072250e+03   8.8467610e+03   2.4629500e+02   2.4629500e+02   7.7569800e+02   2.8800000e+02   6.7101300e+02   2.4950000e+00   9.9800000e-01   1.3075000e+01   1.0300000e+00   3.4171000e+01   6.7700000e-01   9.5300000e-01   9.9600000e-01
   7.1480000e+00   2.1000000e+01   3.8976187e+04   2.6780770e+03   9.1415070e+03   3.3201100e+02   3.3201100e+02   8.3114600e+02   2.8800000e+02   6.9542000e+02   2.9530000e+00   9.9800000e-01   1.5332000e+01   1.0350000e+00   4.4081000e+01   8.7300000e-01   9.5300000e-01   9.9600000e-01
   8.2060000e+00   2.4000000e+01   5.0994819e+04   3.0875550e+03   9.3244550e+03   4.3805100e+02   4.3805100e+02   9.2853100e+02   2.8800000e+02   7.3744300e+02   3.5600000e+00   9.9800000e-01   1.8200000e+01   1.0410000e+00   6.0306000e+01   1.1940000e+00   9.5300000e-01   9.9600000e-01
   9.3000000e+00   2.7000000e+01   7.2779356e+04   3.5604350e+03   9.7909280e+03   6.4483400e+02   6.4483400e+02   1.0937520e+03   2.8800000e+02   7.8509200e+02   4.4760000e+00   9.9800000e-01   2.2263000e+01   1.0490000e+00   9.0120000e+01   1.7840000e+00   9.5300000e-01   9.9600000e-01
   1.1380000e+00   3.0000000e+00   6.5767700e+02   1.3658770e+03   6.7377130e+03   8.4690000e+00   8.4690000e+00   4.5748500e+02   2.8800000e+02   5.4896800e+02   1.1110000e+00   9.9800000e-01   5.9130000e+00   1.0190000e+00   0.0000000e+00   7.6000000e-02   9.5300000e-01   9.9700000e-01
   2.0880000e+00   6.0000000e+00   3.8089910e+03   1.3461380e+03   6.8589300e+03   2.2658000e+01   2.2658000e+01   5.3819700e+02   2.8800000e+02   5.6497000e+02   1.2260000e+00   9.9800000e-01   6.5610000e+00   1.0190000e+00   2.1102000e+01   1.8400000e-01   9.5300000e-01   9.9700000e-01
   3.1440000e+00   9.0000000e+00   8.3811710e+03   1.3867680e+03   7.1618190e+03   6.0384000e+01   6.0384000e+01   5.8670600e+02   2.8800000e+02   5.8364400e+02   1.3870000e+00   9.9800000e-01   7.4160000e+00   1.0200000e+00   1.2293000e+01   2.4300000e-01   9.5300000e-01   9.9700000e-01
   4.1610000e+00   1.2000000e+01   1.4725820e+04   1.5474770e+03   7.8301570e+03   1.1380900e+02   1.1380900e+02   6.4069900e+02   2.8800000e+02   6.0964700e+02   1.6540000e+00   9.9800000e-01   8.8130000e+00   1.0220000e+00   1.7125000e+01   3.3900000e-01   9.5300000e-01   9.9700000e-01
   5.1400000e+00   1.5000000e+01   2.1639366e+04   1.9243500e+03   8.5119640e+03   1.7530700e+02   1.7530700e+02   7.0846600e+02   2.8800000e+02   6.4089800e+02   2.0730000e+00   9.9800000e-01   1.0952000e+01   1.0260000e+00   2.5075000e+01   4.9600000e-01   9.5300000e-01   9.9700000e-01
   6.1750000e+00   1.8000000e+01   2.9798156e+04   2.3072220e+03   8.8477960e+03   2.4636900e+02   2.4636900e+02   7.7463200e+02   2.8800000e+02   6.7079900e+02   2.4950000e+00   9.9800000e-01   1.3062000e+01   1.0300000e+00   3.4102000e+01   6.7500000e-01   9.5300000e-01   9.9700000e-01
   7.1480000e+00   2.1000000e+01   3.8975879e+04   2.6780780e+03   9.1420110e+03   3.3207000e+02   3.3207000e+02   8.3014600e+02   2.8800000e+02   6.9525500e+02   2.9520000e+00   9.9800000e-01   1.5316000e+01   1.0350000e+00   4.4002000e+01   8.7100000e-01   9.5300000e-01   9.9700000e-01
   8.2060000e+00   2.4000000e+01   5.0994708e+04   3.0875520e+03   9.3248550e+03   4.3804000e+02   4.3804000e+02   9.2752100e+02   2.8800000e+02   7.3729300e+02   3.5590000e+00   9.9800000e-01   1.8179000e+01   1.0410000e+00   6.0212000e+01   1.1920000e+00   9.5300000e-01   9.9700000e-01
   9.3000000e+00   2.7000000e+01   7.2779974e+04   3.5604390e+03   9.7916440e+03   6.4482200e+02   6.4482200e+02   1.0928960e+03   2.8800000e+02   7.8496200e+02   4.4750000e+00   9.9800000e-01   2.2237000e+01   1.0490000e+00   9.0018000e+01   1.7820000e+00   9.5300000e-01   9.9700000e-01
   1.1380000e+00   3.0000000e+00   9.0297800e+02   1.3761610e+03   6.7472330e+03   9.0640000e+00   9.0640000e+00   4.6404300e+02   2.8800000e+02   5.5038600e+02   1.1220000e+00   9.9800000e-01   5.9680000e+00   1.0190000e+00   0.0000000e+00   8.3000000e-02   9.5300000e-01   9.9800000e-01
   2.0880000e+00   6.0000000e+00   3.7791800e+03   1.3462050e+03   6.8615080e+03   2.2667000e+01   2.2667000e+01   5.3653600e+02   2.8800000e+02   5.6469000e+02   1.2250000e+00   9.9800000e-01   6.5500000e+00   1.0190000e+00   2.1009000e+01   1.8300000e-01   9.5300000e-01   9.9800000e-01
   3.1440000e+00   9.0000000e+00   8.3812420e+03   1.3867690e+03   7.1644130e+03   6.0377000e+01   6.0377000e+01   5.8591200e+02   2.8800000e+02   5.8349700e+02   1.3870000e+00   9.9800000e-01   7.4090000e+00   1.0200000e+00   1.2260000e+01   2.4300000e-01   9.5300000e-01   9.9800000e-01
   4.1610000e+00   1.2000000e+01   1.4725961e+04   1.5474780e+03   7.8322040e+03   1.1380800e+02   1.1380800e+02   6.3984400e+02   2.8800000e+02   6.0949000e+02   1.6530000e+00   9.9800000e-01   8.8040000e+00   1.0220000e+00   1.7084000e+01   3.3800000e-01   9.5300000e-01   9.9800000e-01
   5.1400000e+00   1.5000000e+01   2.1639326e+04   1.9243530e+03   8.5128760e+03   1.7536100e+02   1.7536100e+02   7.0752100e+02   2.8800000e+02   6.4072100e+02   2.0730000e+00   9.9800000e-01   1.0941000e+01   1.0260000e+00   2.5020000e+01   4.9500000e-01   9.5300000e-01   9.9800000e-01
   6.1750000e+00   1.8000000e+01   2.9798082e+04   2.3072140e+03   8.8488120e+03   2.4633300e+02   2.4633300e+02   7.7357000e+02   2.8800000e+02   6.7058400e+02   2.4940000e+00   9.9800000e-01   1.3049000e+01   1.0300000e+00   3.4032000e+01   6.7400000e-01   9.5300000e-01   9.9800000e-01
   7.1480000e+00   2.1000000e+01   3.8975600e+04   2.6780780e+03   9.1425150e+03   3.3213800e+02   3.3213800e+02   8.2915000e+02   2.8800000e+02   6.9509100e+02   2.9520000e+00   9.9800000e-01   1.5299000e+01   1.0350000e+00   4.3924000e+01   8.7000000e-01   9.5300000e-01   9.9800000e-01
   8.2060000e+00   2.4000000e+01   5.0994573e+04   3.0875510e+03   9.3252540e+03   4.3796300e+02   4.3796300e+02   9.2651400e+02   2.8800000e+02   7.3714400e+02   3.5580000e+00   9.9800000e-01   1.8159000e+01   1.0410000e+00   6.0118000e+01   1.1900000e+00   9.5300000e-01   9.9800000e-01
   9.3000000e+00   2.7000000e+01   7.2780874e+04   3.5604350e+03   9.7923590e+03   6.4511900e+02   6.4511900e+02   1.0920440e+03   2.8800000e+02   7.8483400e+02   4.4730000e+00   9.9800000e-01   2.2210000e+01   1.0490000e+00   8.9917000e+01   1.7800000e+00   9.5300000e-01   9.9800000e-01
   1.1380000e+00   3.0000000e+00   1.1510530e+03   1.3849480e+03   6.7557860e+03   9.5720000e+00   9.5720000e+00   4.7053800e+02   2.8800000e+02   5.5181300e+02   1.1330000e+00   9.9800000e-01   6.0230000e+00   1.0190000e+00   0.0000000e+00   9.1000000e-02   9.5300000e-01   9.9900000e-01
   2.0880000e+00   6.0000000e+00   3.5917660e+03   1.3474950e+03   6.8648020e+03   2.2892000e+01   2.2892000e+01   5.2987500e+02   2.8800000e+02   5.6379100e+02   1.2190000e+00   9.9800000e-01   6.5120000e+00   1.0190000e+00   1.9727000e+01   1.7400000e-01   9.5300000e-01   9.9900000e-01
   3.1440000e+00   9.0000000e+00   8.3812870e+03   1.3867700e+03   7.1670070e+03   6.0374000e+01   6.0374000e+01   5.8512000e+02   2.8800000e+02   5.8334900e+02   1.3860000e+00   9.9800000e-01   7.4020000e+00   1.0200000e+00   1.2227000e+01   2.4200000e-01   9.5300000e-01   9.9900000e-01
   4.1610000e+00   1.2000000e+01   1.4726011e+04   1.5474780e+03   7.8342450e+03   1.1381600e+02   1.1381600e+02   6.3899100e+02   2.8800000e+02   6.0933300e+02   1.6530000e+00   9.9800000e-01   8.7950000e+00   1.0220000e+00   1.7042000e+01   3.3700000e-01   9.5300000e-01   9.9900000e-01
   5.1400000e+00   1.5000000e+01   2.1639525e+04   1.9243550e+03   8.5137940e+03   1.7532400e+02   1.7532400e+02   7.0657900e+02   2.8800000e+02   6.4054400e+02   2.0730000e+00   9.9800000e-01   1.0930000e+01   1.0260000e+00   2.4966000e+01   4.9400000e-01   9.5300000e-01   9.9900000e-01
   6.1750000e+00   1.8000000e+01   2.9798363e+04   2.3072110e+03   8.8498470e+03   2.4630600e+02   2.4630600e+02   7.7251000e+02   2.8800000e+02   6.7037100e+02   2.4940000e+00   9.9800000e-01   1.3035000e+01   1.0300000e+00   3.3962000e+01   6.7200000e-01   9.5300000e-01   9.9900000e-01
   7.1480000e+00   2.1000000e+01   3.8975334e+04   2.6780760e+03   9.1430190e+03   3.3208000e+02   3.3208000e+02   8.2815600e+02   2.8800000e+02   6.9492700e+02   2.9510000e+00   9.9800000e-01   1.5283000e+01   1.0350000e+00   4.3846000e+01   8.6800000e-01   9.5300000e-01   9.9900000e-01
   8.2060000e+00   2.4000000e+01   5.0994486e+04   3.0875500e+03   9.3256530e+03   4.3810100e+02   4.3810100e+02   9.2551000e+02   2.8800000e+02   7.3699600e+02   3.5570000e+00   9.9800000e-01   1.8139000e+01   1.0410000e+00   6.0024000e+01   1.1880000e+00   9.5300000e-01   9.9900000e-01
   9.3000000e+00   2.7000000e+01   7.2781758e+04   3.5604340e+03   9.7930700e+03   6.4499900e+02   6.4499900e+02   1.0911940e+03   2.8800000e+02   7.8470600e+02   4.4720000e+00   9.9800000e-01   2.2184000e+01   1.0490000e+00   8.9815000e+01   1.7780000e+00   9.5300000e-01   9.9900000e-01
   1.1380000e+00   3.0000000e+00   1.2672600e+03   1.3885130e+03   6.7608000e+03   9.7810000e+00   9.7810000e+00   4.7327800e+02   2.8800000e+02   5.5236900e+02   1.1380000e+00   9.9800000e-01   6.0450000e+00   1.0190000e+00   0.0000000e+00   9.4000000e-02   9.5300000e-01   1.0000000e+00
   2.0880000e+00   6.0000000e+00   3.4591200e+03   1.3484550e+03   6.8679620e+03   2.3063000e+01   2.3063000e+01   5.2506500e+02   2.8800000e+02   5.6303700e+02   1.2150000e+00   9.9800000e-01   6.4800000e+00   1.0190000e+00   1.9084000e+01   1.6800000e-01   9.5300000e-01   1.0000000e+00
   3.1440000e+00   9.0000000e+00   8.3814280e+03   1.3867700e+03   7.1696070e+03   6.0388000e+01   6.0388000e+01   5.8433000e+02   2.8800000e+02   5.8320200e+02   1.3860000e+00   9.9800000e-01   7.3950000e+00   1.0200000e+00   1.2194000e+01   2.4100000e-01   9.5300000e-01   1.0000000e+00
   4.1610000e+00   1.2000000e+01   1.4726018e+04   1.5474790e+03   7.8362850e+03   1.1380100e+02   1.1380100e+02   6.3814000e+02   2.8800000e+02   6.0917600e+02   1.6530000e+00   9.9800000e-01   8.7860000e+00   1.0220000e+00   1.7001000e+01   3.3700000e-01   9.5300000e-01   1.0000000e+00
   5.1400000e+00   1.5000000e+01   2.1639629e+04   1.9243570e+03   8.5147090e+03   1.7533500e+02   1.7533500e+02   7.0563900e+02   2.8800000e+02   6.4036800e+02   2.0720000e+00   9.9800000e-01   1.0919000e+01   1.0260000e+00   2.4911000e+01   4.9300000e-01   9.5300000e-01   1.0000000e+00
   6.1750000e+00   1.8000000e+01   2.9798557e+04   2.3072100e+03   8.8508800e+03   2.4638100e+02   2.4638100e+02   7.7145300e+02   2.8800000e+02   6.7015900e+02   2.4940000e+00   9.9800000e-01   1.3022000e+01   1.0300000e+00   3.3893000e+01   6.7100000e-01   9.5300000e-01   1.0000000e+00
   7.1480000e+00   2.1000000e+01   3.8975066e+04   2.6780770e+03   9.1435220e+03   3.3212300e+02   3.3212300e+02   8.2716400e+02   2.8800000e+02   6.9476400e+02   2.9500000e+00   9.9800000e-01   1.5266000e+01   1.0350000e+00   4.3767000e+01   8.6700000e-01   9.5300000e-01   1.0000000e+00
   8.2060000e+00   2.4000000e+01   5.0994433e+04   3.0875470e+03   9.3260510e+03   4.3807400e+02   4.3807400e+02   9.2451000e+02   2.8800000e+02   7.3684900e+02   3.5570000e+00   9.9800000e-01   1.8119000e+01   1.0410000e+00   5.9930000e+01   1.1860000e+00   9.5300000e-01   1.0000000e+00
   9.3000000e+00   2.7000000e+01   7.2782758e+04   3.5604860e+03   9.7937920e+03   6.4514300e+02   6.4514300e+02   1.0903520e+03   2.8800000e+02   7.8458000e+02   4.4710000e+00   9.9800000e-01   2.2158000e+01   1.0490000e+00   8.9715000e+01   1.7760000e+00   9.5300000e-01   1.0000000e+00
   1.1380000e+00   3.0000000e+00   1.9496740e+03   1.3131690e+03   6.6472880e+03   5.5990000e+00   5.5990000e+00   5.3895300e+02   2.8800000e+02   5.5909700e+02   1.1550000e+00   9.9800000e-01   6.3150000e+00   1.0190000e+00   3.0096000e+01   1.8400000e-01   9.5400000e-01   9.7500000e-01
   2.0880000e+00   6.0000000e+00   6.7727860e+03   1.3621980e+03   6.8107250e+03   2.5624000e+01   2.5624000e+01   6.3252100e+02   2.8800000e+02   5.7979800e+02   1.3220000e+00   9.9800000e-01   7.2360000e+00   1.0190000e+00   1.7707000e+01   2.8900000e-01   9.5400000e-01   9.7500000e-01
   3.1440000e+00   9.0000000e+00   8.3788130e+03   1.3867550e+03   7.1025690e+03   6.0348000e+01   6.0348000e+01   6.0412300e+02   2.8800000e+02   5.8669500e+02   1.3890000e+00   9.9800000e-01   7.5760000e+00   1.0200000e+00   1.3017000e+01   2.5800000e-01   9.5400000e-01   9.7500000e-01
   4.1610000e+00   1.2000000e+01   1.4723759e+04   1.5474630e+03   7.7833360e+03   1.1379200e+02   1.1379200e+02   6.5957700e+02   2.8800000e+02   6.1295800e+02   1.6580000e+00   9.9800000e-01   9.0110000e+00   1.0220000e+00   1.8034000e+01   3.5700000e-01   9.5400000e-01   9.7500000e-01
   5.1400000e+00   1.5000000e+01   2.1635228e+04   1.9243110e+03   8.4908700e+03   1.7526500e+02   1.7526500e+02   7.2931400e+02   2.8800000e+02   6.4462500e+02   2.0800000e+00   9.9800000e-01   1.1203000e+01   1.0260000e+00   2.6276000e+01   5.2000000e-01   9.5400000e-01   9.7500000e-01
   6.1750000e+00   1.8000000e+01   2.9791459e+04   2.3074480e+03   8.8239700e+03   2.4619400e+02   2.4619400e+02   7.9828400e+02   2.8800000e+02   6.7540400e+02   2.5030000e+00   9.9800000e-01   1.3364000e+01   1.0300000e+00   3.5657000e+01   7.0600000e-01   9.5400000e-01   9.7500000e-01
   7.1480000e+00   2.1000000e+01   3.8984647e+04   2.6780840e+03   9.1304030e+03   3.3220300e+02   3.3220300e+02   8.5199900e+02   2.8800000e+02   6.9867000e+02   2.9660000e+00   9.9800000e-01   1.5692000e+01   1.0350000e+00   4.5738000e+01   9.0600000e-01   9.5400000e-01   9.7500000e-01
   8.2060000e+00   2.4000000e+01   5.0996054e+04   3.0875330e+03   9.3160820e+03   4.3804000e+02   4.3804000e+02   9.4940700e+02   2.8800000e+02   7.4046800e+02   3.5790000e+00   9.9800000e-01   1.8646000e+01   1.0410000e+00   6.2283000e+01   1.2330000e+00   9.5400000e-01   9.7500000e-01
   9.3000000e+00   2.7000000e+01   7.2761803e+04   3.5603960e+03   9.7737460e+03   6.4499200e+02   6.4499200e+02   1.1110790e+03   2.8800000e+02   7.8761300e+02   4.5030000e+00   9.9800000e-01   2.2837000e+01   1.0490000e+00   9.2238000e+01   1.8260000e+00   9.5400000e-01   9.7500000e-01
   1.1380000e+00   3.0000000e+00   9.4874500e+02   1.3211270e+03   6.6535550e+03   6.0210000e+00   6.0210000e+00   5.0104100e+02   2.8800000e+02   5.5358600e+02   1.1200000e+00   9.9800000e-01   6.0940000e+00   1.0190000e+00   2.4423000e+01   1.3700000e-01   9.5400000e-01   9.7600000e-01
   2.0880000e+00   6.0000000e+00   6.8115370e+03   1.3630180e+03   6.8137860e+03   2.5778000e+01   2.5778000e+01   6.3239500e+02   2.8800000e+02   5.7979000e+02   1.3240000e+00   9.9800000e-01   7.2360000e+00   1.0190000e+00   1.7105000e+01   2.8900000e-01   9.5400000e-01   9.7600000e-01
   3.1440000e+00   9.0000000e+00   8.3789180e+03   1.3867550e+03   7.1051480e+03   6.0350000e+01   6.0350000e+01   6.0329300e+02   2.8800000e+02   5.8654500e+02   1.3890000e+00   9.9800000e-01   7.5690000e+00   1.0200000e+00   1.2983000e+01   2.5700000e-01   9.5400000e-01   9.7600000e-01
   4.1610000e+00   1.2000000e+01   1.4723891e+04   1.5474630e+03   7.7853420e+03   1.1377300e+02   1.1377300e+02   6.5867500e+02   2.8800000e+02   6.1279500e+02   1.6580000e+00   9.9800000e-01   9.0020000e+00   1.0220000e+00   1.7991000e+01   3.5600000e-01   9.5400000e-01   9.7600000e-01
   5.1400000e+00   1.5000000e+01   2.1635312e+04   1.9243130e+03   8.4917800e+03   1.7528400e+02   1.7528400e+02   7.2831500e+02   2.8800000e+02   6.4444000e+02   2.0790000e+00   9.9800000e-01   1.1191000e+01   1.0260000e+00   2.6219000e+01   5.1900000e-01   9.5400000e-01   9.7600000e-01
   6.1750000e+00   1.8000000e+01   2.9791708e+04   2.3074290e+03   8.8250010e+03   2.4627700e+02   2.4627700e+02   7.9714900e+02   2.8800000e+02   6.7517600e+02   2.5030000e+00   9.9800000e-01   1.3350000e+01   1.0300000e+00   3.5583000e+01   7.0400000e-01   9.5400000e-01   9.7600000e-01
   7.1480000e+00   2.1000000e+01   3.8984266e+04   2.6780860e+03   9.1309040e+03   3.3210600e+02   3.3210600e+02   8.5095500e+02   2.8800000e+02   6.9849500e+02   2.9650000e+00   9.9800000e-01   1.5675000e+01   1.0350000e+00   4.5656000e+01   9.0400000e-01   9.5400000e-01   9.7600000e-01
   8.2060000e+00   2.4000000e+01   5.0996525e+04   3.0875580e+03   9.3164580e+03   4.3799300e+02   4.3799300e+02   9.4835700e+02   2.8800000e+02   7.4030300e+02   3.5780000e+00   9.9800000e-01   1.8624000e+01   1.0410000e+00   6.2186000e+01   1.2310000e+00   9.5400000e-01   9.7600000e-01
   9.3000000e+00   2.7000000e+01   7.2762405e+04   3.5604040e+03   9.7745510e+03   6.4474600e+02   6.4474600e+02   1.1101730e+03   2.8800000e+02   7.8746600e+02   4.5010000e+00   9.9800000e-01   2.2810000e+01   1.0490000e+00   9.2131000e+01   1.8240000e+00   9.5400000e-01   9.7600000e-01
   1.1380000e+00   3.0000000e+00   2.8445900e+02   1.3446420e+03   6.6703080e+03   7.2960000e+00   7.2960000e+00   4.6360100e+02   2.8800000e+02   5.4945400e+02   1.0950000e+00   9.9800000e-01   5.9350000e+00   1.0190000e+00   1.0029000e+01   8.4000000e-02   9.5400000e-01   9.7700000e-01
   2.0880000e+00   6.0000000e+00   6.6282040e+03   1.3588160e+03   6.8136870e+03   2.5005000e+01   2.5005000e+01   6.2785100e+02   2.8800000e+02   5.7894000e+02   1.3170000e+00   9.9800000e-01   7.1960000e+00   1.0190000e+00   1.9277000e+01   2.8500000e-01   9.5400000e-01   9.7700000e-01
   3.1440000e+00   9.0000000e+00   8.3789860e+03   1.3867560e+03   7.1077260e+03   6.0350000e+01   6.0350000e+01   6.0246400e+02   2.8800000e+02   5.8639500e+02   1.3890000e+00   9.9800000e-01   7.5610000e+00   1.0200000e+00   1.2949000e+01   2.5600000e-01   9.5400000e-01   9.7700000e-01
   4.1610000e+00   1.2000000e+01   1.4723956e+04   1.5474640e+03   7.7873440e+03   1.1378600e+02   1.1378600e+02   6.5777500e+02   2.8800000e+02   6.1263100e+02   1.6580000e+00   9.9800000e-01   8.9930000e+00   1.0220000e+00   1.7948000e+01   3.5500000e-01   9.5400000e-01   9.7700000e-01
   5.1400000e+00   1.5000000e+01   2.1635505e+04   1.9243150e+03   8.4926920e+03   1.7529800e+02   1.7529800e+02   7.2732000e+02   2.8800000e+02   6.4425600e+02   2.0790000e+00   9.9800000e-01   1.1180000e+01   1.0260000e+00   2.6162000e+01   5.1800000e-01   9.5400000e-01   9.7700000e-01
   6.1750000e+00   1.8000000e+01   2.9792077e+04   2.3074170e+03   8.8260390e+03   2.4628800e+02   2.4628800e+02   7.9601700e+02   2.8800000e+02   6.7495000e+02   2.5020000e+00   9.9800000e-01   1.3336000e+01   1.0300000e+00   3.5509000e+01   7.0300000e-01   9.5400000e-01   9.7700000e-01
   7.1480000e+00   2.1000000e+01   3.8983839e+04   2.6780850e+03   9.1314050e+03   3.3218600e+02   3.3218600e+02   8.4991300e+02   2.8800000e+02   6.9832000e+02   2.9650000e+00   9.9800000e-01   1.5657000e+01   1.0350000e+00   4.5574000e+01   9.0200000e-01   9.5400000e-01   9.7700000e-01
   8.2060000e+00   2.4000000e+01   5.0996937e+04   3.0875770e+03   9.3168320e+03   4.3803300e+02   4.3803300e+02   9.4731000e+02   2.8800000e+02   7.4013700e+02   3.5770000e+00   9.9800000e-01   1.8603000e+01   1.0410000e+00   6.2088000e+01   1.2290000e+00   9.5400000e-01   9.7700000e-01
   9.3000000e+00   2.7000000e+01   7.2763718e+04   3.5604030e+03   9.7753590e+03   6.4472300e+02   6.4472300e+02   1.1092720e+03   2.8800000e+02   7.8732100e+02   4.5000000e+00   9.9800000e-01   2.2782000e+01   1.0490000e+00   9.2024000e+01   1.8220000e+00   9.5400000e-01   9.7700000e-01
   1.1380000e+00   3.0000000e+00   6.5417500e+02   1.3668870e+03   6.6879460e+03   8.5550000e+00   8.5550000e+00   4.6843100e+02   2.8800000e+02   5.5158100e+02   1.1120000e+00   9.9800000e-01   6.0180000e+00   1.0190000e+00   0.0000000e+00   8.3000000e-02   9.5400000e-01   9.7800000e-01
   2.0880000e+00   6.0000000e+00   6.5046620e+03   1.3568850e+03   6.8150420e+03   2.4663000e+01   2.4663000e+01   6.2417900e+02   2.8800000e+02   5.7828900e+02   1.3130000e+00   9.9800000e-01   7.1650000e+00   1.0190000e+00   1.9974000e+01   2.8100000e-01   9.5400000e-01   9.7800000e-01
   3.1440000e+00   9.0000000e+00   8.3790710e+03   1.3867560e+03   7.1103050e+03   6.0353000e+01   6.0353000e+01   6.0163700e+02   2.8800000e+02   5.8624500e+02   1.3890000e+00   9.9800000e-01   7.5540000e+00   1.0200000e+00   1.2915000e+01   2.5600000e-01   9.5400000e-01   9.7800000e-01
   4.1610000e+00   1.2000000e+01   1.4723996e+04   1.5474650e+03   7.7893460e+03   1.1379500e+02   1.1379500e+02   6.5687700e+02   2.8800000e+02   6.1246800e+02   1.6580000e+00   9.9800000e-01   8.9840000e+00   1.0220000e+00   1.7906000e+01   3.5400000e-01   9.5400000e-01   9.7800000e-01
   5.1400000e+00   1.5000000e+01   2.1635764e+04   1.9243160e+03   8.4936070e+03   1.7531400e+02   1.7531400e+02   7.2632800e+02   2.8800000e+02   6.4407200e+02   2.0790000e+00   9.9800000e-01   1.1168000e+01   1.0260000e+00   2.6106000e+01   5.1700000e-01   9.5400000e-01   9.7800000e-01
   6.1750000e+00   1.8000000e+01   2.9792517e+04   2.3074090e+03   8.8270800e+03   2.4624400e+02   2.4624400e+02   7.9489000e+02   2.8800000e+02   6.7472400e+02   2.5020000e+00   9.9800000e-01   1.3322000e+01   1.0300000e+00   3.5436000e+01   7.0200000e-01   9.5400000e-01   9.7800000e-01
   7.1480000e+00   2.1000000e+01   3.8983393e+04   2.6780880e+03   9.1319050e+03   3.3221100e+02   3.3221100e+02   8.4887500e+02   2.8800000e+02   6.9814500e+02   2.9640000e+00   9.9800000e-01   1.5640000e+01   1.0350000e+00   4.5492000e+01   9.0100000e-01   9.5400000e-01   9.7800000e-01
   8.2060000e+00   2.4000000e+01   5.0997237e+04   3.0875930e+03   9.3172030e+03   4.3814600e+02   4.3814600e+02   9.4626600e+02   2.8800000e+02   7.3997200e+02   3.5760000e+00   9.9800000e-01   1.8581000e+01   1.0410000e+00   6.1991000e+01   1.2270000e+00   9.5400000e-01   9.7800000e-01
   9.3000000e+00   2.7000000e+01   7.2765260e+04   3.5604010e+03   9.7761670e+03   6.4478200e+02   6.4478200e+02   1.1083750e+03   2.8800000e+02   7.8717700e+02   4.4990000e+00   9.9800000e-01   2.2755000e+01   1.0490000e+00   9.1919000e+01   1.8200000e+00   9.5400000e-01   9.7800000e-01
   1.1380000e+00   3.0000000e+00   9.8476900e+02   1.3796850e+03   6.6993410e+03   9.2930000e+00   9.2930000e+00   4.7780800e+02   2.8800000e+02   5.5343400e+02   1.1270000e+00   9.9800000e-01   6.0910000e+00   1.0190000e+00   0.0000000e+00   9.4000000e-02   9.5400000e-01   9.7900000e-01
   2.0880000e+00   6.0000000e+00   6.4589880e+03   1.3561500e+03   6.8171230e+03   2.4529000e+01   2.4529000e+01   6.2233100e+02   2.8800000e+02   5.7800100e+02   1.3110000e+00   9.9800000e-01   7.1520000e+00   1.0190000e+00   2.0390000e+01   2.7900000e-01   9.5400000e-01   9.7900000e-01
   3.1440000e+00   9.0000000e+00   8.3791690e+03   1.3867570e+03   7.1128860e+03   6.0359000e+01   6.0359000e+01   6.0081200e+02   2.8800000e+02   5.8609600e+02   1.3890000e+00   9.9800000e-01   7.5460000e+00   1.0200000e+00   1.2881000e+01   2.5500000e-01   9.5400000e-01   9.7900000e-01
   4.1610000e+00   1.2000000e+01   1.4724074e+04   1.5474650e+03   7.7913530e+03   1.1379600e+02   1.1379600e+02   6.5598100e+02   2.8800000e+02   6.1230500e+02   1.6580000e+00   9.9800000e-01   8.9750000e+00   1.0220000e+00   1.7863000e+01   3.5400000e-01   9.5400000e-01   9.7900000e-01
   5.1400000e+00   1.5000000e+01   2.1635910e+04   1.9243180e+03   8.4945190e+03   1.7530700e+02   1.7530700e+02   7.2533700e+02   2.8800000e+02   6.4388800e+02   2.0790000e+00   9.9800000e-01   1.1157000e+01   1.0260000e+00   2.6049000e+01   5.1600000e-01   9.5400000e-01   9.7900000e-01
   6.1750000e+00   1.8000000e+01   2.9792763e+04   2.3073920e+03   8.8281110e+03   2.4628000e+02   2.4628000e+02   7.9376500e+02   2.8800000e+02   6.7449900e+02   2.5020000e+00   9.9800000e-01   1.3308000e+01   1.0300000e+00   3.5363000e+01   7.0000000e-01   9.5400000e-01   9.7900000e-01
   7.1480000e+00   2.1000000e+01   3.8983008e+04   2.6780870e+03   9.1324050e+03   3.3210200e+02   3.3210200e+02   8.4783900e+02   2.8800000e+02   6.9797100e+02   2.9640000e+00   9.9800000e-01   1.5623000e+01   1.0350000e+00   4.5411000e+01   8.9900000e-01   9.5400000e-01   9.7900000e-01
   8.2060000e+00   2.4000000e+01   5.0997413e+04   3.0876070e+03   9.3175710e+03   4.3802000e+02   4.3802000e+02   9.4522400e+02   2.8800000e+02   7.3980800e+02   3.5760000e+00   9.9800000e-01   1.8560000e+01   1.0410000e+00   6.1894000e+01   1.2250000e+00   9.5400000e-01   9.7900000e-01
   9.3000000e+00   2.7000000e+01   7.2765742e+04   3.5604040e+03   9.7769550e+03   6.4475600e+02   6.4475600e+02   1.1074740e+03   2.8800000e+02   7.8703300e+02   4.4980000e+00   9.9800000e-01   2.2727000e+01   1.0490000e+00   9.1812000e+01   1.8170000e+00   9.5400000e-01   9.7900000e-01
   1.1380000e+00   3.0000000e+00   1.1912950e+03   1.3865180e+03   6.7066780e+03   9.6940000e+00   9.6940000e+00   4.8323300e+02   2.8800000e+02   5.5460500e+02   1.1360000e+00   9.9800000e-01   6.1380000e+00   1.0190000e+00   0.0000000e+00   1.0000000e-01   9.5400000e-01   9.8000000e-01
   2.0880000e+00   6.0000000e+00   6.2331300e+03   1.3530140e+03   6.8177220e+03   2.3954000e+01   2.3954000e+01   6.1622900e+02   2.8800000e+02   5.7693900e+02   1.3040000e+00   9.9800000e-01   7.1020000e+00   1.0190000e+00   2.1455000e+01   2.7300000e-01   9.5400000e-01   9.8000000e-01
   3.1440000e+00   9.0000000e+00   8.3793260e+03   1.3867580e+03   7.1154710e+03   6.0360000e+01   6.0360000e+01   5.9998900e+02   2.8800000e+02   5.8594700e+02   1.3890000e+00   9.9800000e-01   7.5390000e+00   1.0200000e+00   1.2847000e+01   2.5400000e-01   9.5400000e-01   9.8000000e-01
   4.1610000e+00   1.2000000e+01   1.4724205e+04   1.5474660e+03   7.7933660e+03   1.1379700e+02   1.1379700e+02   6.5508800e+02   2.8800000e+02   6.1214300e+02   1.6570000e+00   9.9800000e-01   8.9650000e+00   1.0220000e+00   1.7820000e+01   3.5300000e-01   9.5400000e-01   9.8000000e-01
   5.1400000e+00   1.5000000e+01   2.1636236e+04   1.9243180e+03   8.4954360e+03   1.7529100e+02   1.7529100e+02   7.2435100e+02   2.8800000e+02   6.4370600e+02   2.0780000e+00   9.9800000e-01   1.1145000e+01   1.0260000e+00   2.5993000e+01   5.1500000e-01   9.5400000e-01   9.8000000e-01
   6.1750000e+00   1.8000000e+01   2.9793053e+04   2.3073780e+03   8.8291450e+03   2.4621900e+02   2.4621900e+02   7.9264400e+02   2.8800000e+02   6.7427400e+02   2.5010000e+00   9.9800000e-01   1.3295000e+01   1.0300000e+00   3.5290000e+01   6.9900000e-01   9.5400000e-01   9.8000000e-01
   7.1480000e+00   2.1000000e+01   3.8982583e+04   2.6780880e+03   9.1329040e+03   3.3220300e+02   3.3220300e+02   8.4680600e+02   2.8800000e+02   6.9779800e+02   2.9630000e+00   9.9800000e-01   1.5606000e+01   1.0350000e+00   4.5330000e+01   8.9700000e-01   9.5400000e-01   9.8000000e-01
   8.2060000e+00   2.4000000e+01   5.0997574e+04   3.0876150e+03   9.3179380e+03   4.3814100e+02   4.3814100e+02   9.4418500e+02   2.8800000e+02   7.3964400e+02   3.5750000e+00   9.9800000e-01   1.8539000e+01   1.0410000e+00   6.1797000e+01   1.2230000e+00   9.5400000e-01   9.8000000e-01
   9.3000000e+00   2.7000000e+01   7.2766131e+04   3.5604120e+03   9.7777380e+03   6.4509000e+02   6.4509000e+02   1.1065760e+03   2.8800000e+02   7.8688900e+02   4.4970000e+00   9.9800000e-01   2.2700000e+01   1.0490000e+00   9.1705000e+01   1.8150000e+00   9.5400000e-01   9.8000000e-01
   1.1380000e+00   3.0000000e+00   1.7022380e+03   1.4000160e+03   6.7186500e+03   1.0501000e+01   1.0501000e+01   4.9809600e+02   2.8800000e+02   5.5742800e+02   1.1580000e+00   9.9800000e-01   6.2510000e+00   1.0190000e+00   0.0000000e+00   1.1700000e-01   9.5400000e-01   9.8100000e-01
   2.0880000e+00   6.0000000e+00   5.8238710e+03   1.3491360e+03   6.8178400e+03   2.3251000e+01   2.3251000e+01   6.0548000e+02   2.8800000e+02   5.7518200e+02   1.2900000e+00   9.9800000e-01   7.0210000e+00   1.0190000e+00   2.2633000e+01   2.6100000e-01   9.5400000e-01   9.8100000e-01
   3.1440000e+00   9.0000000e+00   8.3793330e+03   1.3867580e+03   7.1180470e+03   6.0355000e+01   6.0355000e+01   5.9916700e+02   2.8800000e+02   5.8579700e+02   1.3890000e+00   9.9800000e-01   7.5320000e+00   1.0200000e+00   1.2813000e+01   2.5400000e-01   9.5400000e-01   9.8100000e-01
   4.1610000e+00   1.2000000e+01   1.4724352e+04   1.5474660e+03   7.7953820e+03   1.1378300e+02   1.1378300e+02   6.5419800e+02   2.8800000e+02   6.1198000e+02   1.6570000e+00   9.9800000e-01   8.9560000e+00   1.0220000e+00   1.7777000e+01   3.5200000e-01   9.5400000e-01   9.8100000e-01
   5.1400000e+00   1.5000000e+01   2.1636222e+04   1.9243200e+03   8.4963440e+03   1.7530500e+02   1.7530500e+02   7.2336400e+02   2.8800000e+02   6.4352200e+02   2.0780000e+00   9.9800000e-01   1.1134000e+01   1.0260000e+00   2.5937000e+01   5.1300000e-01   9.5400000e-01   9.8100000e-01
   6.1750000e+00   1.8000000e+01   2.9793461e+04   2.3073690e+03   8.8301850e+03   2.4625300e+02   2.4625300e+02   7.9152600e+02   2.8800000e+02   6.7405100e+02   2.5010000e+00   9.9800000e-01   1.3281000e+01   1.0300000e+00   3.5217000e+01   6.9700000e-01   9.5400000e-01   9.8100000e-01
   7.1480000e+00   2.1000000e+01   3.8982030e+04   2.6780870e+03   9.1334080e+03   3.3221300e+02   3.3221300e+02   8.4577000e+02   2.8800000e+02   6.9762500e+02   2.9620000e+00   9.9800000e-01   1.5588000e+01   1.0350000e+00   4.5248000e+01   8.9600000e-01   9.5400000e-01   9.8100000e-01
   8.2060000e+00   2.4000000e+01   5.0997667e+04   3.0876210e+03   9.3183030e+03   4.3800200e+02   4.3800200e+02   9.4314900e+02   2.8800000e+02   7.3948000e+02   3.5740000e+00   9.9800000e-01   1.8517000e+01   1.0410000e+00   6.1700000e+01   1.2210000e+00   9.5400000e-01   9.8100000e-01
   9.3000000e+00   2.7000000e+01   7.2766704e+04   3.5604190e+03   9.7785210e+03   6.4487300e+02   6.4487300e+02   1.1056820e+03   2.8800000e+02   7.8674700e+02   4.4950000e+00   9.9800000e-01   2.2673000e+01   1.0490000e+00   9.1599000e+01   1.8130000e+00   9.5400000e-01   9.8100000e-01
   1.1380000e+00   3.0000000e+00   2.4194150e+03   1.4119180e+03   6.7297790e+03   1.1236000e+01   1.1236000e+01   5.1956400e+02   2.8800000e+02   5.6123600e+02   1.1860000e+00   9.9800000e-01   6.4080000e+00   1.0190000e+00   0.0000000e+00   1.4200000e-01   9.5400000e-01   9.8200000e-01
   2.0880000e+00   6.0000000e+00   5.9635230e+03   1.3503590e+03   6.8211730e+03   2.3465000e+01   2.3465000e+01   6.0807100e+02   2.8800000e+02   5.7561400e+02   1.2950000e+00   9.9800000e-01   7.0410000e+00   1.0190000e+00   2.2339000e+01   2.6500000e-01   9.5400000e-01   9.8200000e-01
   3.1440000e+00   9.0000000e+00   8.3794490e+03   1.3867590e+03   7.1206320e+03   6.0350000e+01   6.0350000e+01   5.9834700e+02   2.8800000e+02   5.8564800e+02   1.3880000e+00   9.9800000e-01   7.5240000e+00   1.0200000e+00   1.2779000e+01   2.5300000e-01   9.5400000e-01   9.8200000e-01
   4.1610000e+00   1.2000000e+01   1.4724336e+04   1.5474670e+03   7.7973870e+03   1.1378500e+02   1.1378500e+02   6.5330800e+02   2.8800000e+02   6.1181800e+02   1.6570000e+00   9.9800000e-01   8.9470000e+00   1.0220000e+00   1.7735000e+01   3.5100000e-01   9.5400000e-01   9.8200000e-01
   5.1400000e+00   1.5000000e+01   2.1636482e+04   1.9243220e+03   8.4972590e+03   1.7532500e+02   1.7532500e+02   7.2238200e+02   2.8800000e+02   6.4334000e+02   2.0780000e+00   9.9800000e-01   1.1122000e+01   1.0260000e+00   2.5880000e+01   5.1200000e-01   9.5400000e-01   9.8200000e-01
   6.1750000e+00   1.8000000e+01   2.9793751e+04   2.3073560e+03   8.8312180e+03   2.4630700e+02   2.4630700e+02   7.9041200e+02   2.8800000e+02   6.7382700e+02   2.5010000e+00   9.9800000e-01   1.3267000e+01   1.0300000e+00   3.5144000e+01   6.9600000e-01   9.5400000e-01   9.8200000e-01
   7.1480000e+00   2.1000000e+01   3.8981453e+04   2.6780800e+03   9.1339180e+03   3.3219000e+02   3.3219000e+02   8.4473100e+02   2.8800000e+02   6.9745400e+02   2.9620000e+00   9.9800000e-01   1.5571000e+01   1.0350000e+00   4.5167000e+01   8.9400000e-01   9.5400000e-01   9.8200000e-01
   8.2060000e+00   2.4000000e+01   5.0997694e+04   3.0876220e+03   9.3186660e+03   4.3803500e+02   4.3803500e+02   9.4211500e+02   2.8800000e+02   7.3931700e+02   3.5730000e+00   9.9800000e-01   1.8496000e+01   1.0410000e+00   6.1603000e+01   1.2200000e+00   9.5400000e-01   9.8200000e-01
   9.3000000e+00   2.7000000e+01   7.2768156e+04   3.5604130e+03   9.7793080e+03   6.4506600e+02   6.4506600e+02   1.1047940e+03   2.8800000e+02   7.8660600e+02   4.4940000e+00   9.9800000e-01   2.2645000e+01   1.0490000e+00   9.1494000e+01   1.8110000e+00   9.5400000e-01   9.8200000e-01
   1.1380000e+00   3.0000000e+00   3.0443980e+03   1.4175030e+03   6.7364480e+03   1.1583000e+01   1.1583000e+01   5.3801500e+02   2.8800000e+02   5.6424200e+02   1.2100000e+00   9.9800000e-01   6.5340000e+00   1.0190000e+00   0.0000000e+00   1.6400000e-01   9.5400000e-01   9.8300000e-01
   2.0880000e+00   6.0000000e+00   5.7666040e+03   1.3486370e+03   6.8226320e+03   2.3149000e+01   2.3149000e+01   6.0231000e+02   2.8800000e+02   5.7464000e+02   1.2880000e+00   9.9800000e-01   6.9960000e+00   1.0190000e+00   2.2594000e+01   2.5900000e-01   9.5400000e-01   9.8300000e-01
   3.1440000e+00   9.0000000e+00   8.3795420e+03   1.3867590e+03   7.1232150e+03   6.0358000e+01   6.0358000e+01   5.9752900e+02   2.8800000e+02   5.8549900e+02   1.3880000e+00   9.9800000e-01   7.5170000e+00   1.0200000e+00   1.2745000e+01   2.5200000e-01   9.5400000e-01   9.8300000e-01
   4.1610000e+00   1.2000000e+01   1.4724471e+04   1.5474680e+03   7.7994060e+03   1.1379700e+02   1.1379700e+02   6.5242200e+02   2.8800000e+02   6.1165700e+02   1.6570000e+00   9.9800000e-01   8.9380000e+00   1.0220000e+00   1.7693000e+01   3.5000000e-01   9.5400000e-01   9.8300000e-01
   5.1400000e+00   1.5000000e+01   2.1636553e+04   1.9243250e+03   8.4981690e+03   1.7531800e+02   1.7531800e+02   7.2140100e+02   2.8800000e+02   6.4315800e+02   2.0770000e+00   9.9800000e-01   1.1111000e+01   1.0260000e+00   2.5824000e+01   5.1100000e-01   9.5400000e-01   9.8300000e-01
   6.1750000e+00   1.8000000e+01   2.9794085e+04   2.3073450e+03   8.8322530e+03   2.4624300e+02   2.4624300e+02   7.8930100e+02   2.8800000e+02   6.7360500e+02   2.5000000e+00   9.9800000e-01   1.3253000e+01   1.0300000e+00   3.5072000e+01   6.9400000e-01   9.5400000e-01   9.8300000e-01
   7.1480000e+00   2.1000000e+01   3.8980987e+04   2.6780780e+03   9.1344270e+03   3.3213700e+02   3.3213700e+02   8.4369400e+02   2.8800000e+02   6.9728300e+02   2.9610000e+00   9.9800000e-01   1.5554000e+01   1.0350000e+00   4.5086000e+01   8.9300000e-01   9.5400000e-01   9.8300000e-01
   8.2060000e+00   2.4000000e+01   5.0997566e+04   3.0876230e+03   9.3190260e+03   4.3807500e+02   4.3807500e+02   9.4108500e+02   2.8800000e+02   7.3915500e+02   3.5720000e+00   9.9800000e-01   1.8475000e+01   1.0410000e+00   6.1507000e+01   1.2180000e+00   9.5400000e-01   9.8300000e-01
   9.3000000e+00   2.7000000e+01   7.2769034e+04   3.5604140e+03   9.7800850e+03   6.4507400e+02   6.4507400e+02   1.1039060e+03   2.8800000e+02   7.8646600e+02   4.4930000e+00   9.9800000e-01   2.2618000e+01   1.0490000e+00   9.1389000e+01   1.8090000e+00   9.5400000e-01   9.8300000e-01
   1.1380000e+00   3.0000000e+00   3.8907980e+03   1.4182660e+03   6.7401220e+03   1.1647000e+01   1.1647000e+01   5.6271400e+02   2.8800000e+02   5.6801600e+02   1.2400000e+00   9.9800000e-01   6.6970000e+00   1.0190000e+00   0.0000000e+00   1.9300000e-01   9.5400000e-01   9.8400000e-01
   2.0880000e+00   6.0000000e+00   5.4695690e+03   1.3468610e+03   6.8240430e+03   2.2825000e+01   2.2825000e+01   5.9402900e+02   2.8800000e+02   5.7331200e+02   1.2790000e+00   9.9800000e-01   6.9350000e+00   1.0190000e+00   2.2981000e+01   2.4900000e-01   9.5400000e-01   9.8400000e-01
   3.1440000e+00   9.0000000e+00   8.3796200e+03   1.3867600e+03   7.1257980e+03   6.0356000e+01   6.0356000e+01   5.9671200e+02   2.8800000e+02   5.8535000e+02   1.3880000e+00   9.9800000e-01   7.5100000e+00   1.0200000e+00   1.2711000e+01   2.5200000e-01   9.5400000e-01   9.8400000e-01
   4.1610000e+00   1.2000000e+01   1.4724543e+04   1.5474680e+03   7.8014210e+03   1.1380100e+02   1.1380100e+02   6.5153700e+02   2.8800000e+02   6.1149500e+02   1.6560000e+00   9.9800000e-01   8.9290000e+00   1.0220000e+00   1.7650000e+01   3.4900000e-01   9.5400000e-01   9.8400000e-01
   5.1400000e+00   1.5000000e+01   2.1636899e+04   1.9243260e+03   8.4990870e+03   1.7528800e+02   1.7528800e+02   7.2042400e+02   2.8800000e+02   6.4297600e+02   2.0770000e+00   9.9800000e-01   1.1100000e+01   1.0260000e+00   2.5768000e+01   5.1000000e-01   9.5400000e-01   9.8400000e-01
   6.1750000e+00   1.8000000e+01   2.9794366e+04   2.3073320e+03   8.8332860e+03   2.4625300e+02   2.4625300e+02   7.8819400e+02   2.8800000e+02   6.7338300e+02   2.5000000e+00   9.9800000e-01   1.3240000e+01   1.0300000e+00   3.4999000e+01   6.9300000e-01   9.5400000e-01   9.8400000e-01
   7.1480000e+00   2.1000000e+01   3.8980639e+04   2.6780780e+03   9.1349360e+03   3.3218900e+02   3.3218900e+02   8.4265900e+02   2.8800000e+02   6.9711200e+02   2.9610000e+00   9.9800000e-01   1.5537000e+01   1.0350000e+00   4.5005000e+01   8.9100000e-01   9.5400000e-01   9.8400000e-01
   8.2060000e+00   2.4000000e+01   5.0997407e+04   3.0876220e+03   9.3193860e+03   4.3798200e+02   4.3798200e+02   9.4005700e+02   2.8800000e+02   7.3899300e+02   3.5710000e+00   9.9800000e-01   1.8453000e+01   1.0410000e+00   6.1410000e+01   1.2160000e+00   9.5400000e-01   9.8400000e-01
   9.3000000e+00   2.7000000e+01   7.2770119e+04   3.5604170e+03   9.7808610e+03   6.4481200e+02   6.4481200e+02   1.1030220e+03   2.8800000e+02   7.8632600e+02   4.4920000e+00   9.9800000e-01   2.2591000e+01   1.0490000e+00   9.1284000e+01   1.8070000e+00   9.5400000e-01   9.8400000e-01
   1.1380000e+00   3.0000000e+00   4.4407150e+03   1.4159620e+03   6.7415100e+03   1.1508000e+01   1.1508000e+01   5.7876700e+02   2.8800000e+02   5.7012000e+02   1.2580000e+00   9.9800000e-01   6.7890000e+00   1.0190000e+00   0.0000000e+00   2.1200000e-01   9.5400000e-01   9.8500000e-01
   2.0880000e+00   6.0000000e+00   5.4395760e+03   1.3468090e+03   6.8266060e+03   2.2815000e+01   2.2815000e+01   5.9248700e+02   2.8800000e+02   5.7316900e+02   1.2780000e+00   9.9800000e-01   6.9290000e+00   1.0190000e+00   2.3409000e+01   2.4700000e-01   9.5400000e-01   9.8500000e-01
   3.1440000e+00   9.0000000e+00   8.3797730e+03   1.3867600e+03   7.1283860e+03   6.0367000e+01   6.0367000e+01   5.9589800e+02   2.8800000e+02   5.8520100e+02   1.3880000e+00   9.9800000e-01   7.5020000e+00   1.0200000e+00   1.2678000e+01   2.5100000e-01   9.5400000e-01   9.8500000e-01
   4.1610000e+00   1.2000000e+01   1.4724541e+04   1.5474690e+03   7.8034310e+03   1.1378200e+02   1.1378200e+02   6.5065500e+02   2.8800000e+02   6.1133400e+02   1.6560000e+00   9.9800000e-01   8.9200000e+00   1.0220000e+00   1.7608000e+01   3.4900000e-01   9.5400000e-01   9.8500000e-01
   5.1400000e+00   1.5000000e+01   2.1636847e+04   1.9243290e+03   8.4999940e+03   1.7528700e+02   1.7528700e+02   7.1944700e+02   2.8800000e+02   6.4279400e+02   2.0770000e+00   9.9800000e-01   1.1088000e+01   1.0260000e+00   2.5712000e+01   5.0900000e-01   9.5400000e-01   9.8500000e-01
   6.1750000e+00   1.8000000e+01   2.9794728e+04   2.3073240e+03   8.8343230e+03   2.4630300e+02   2.4630300e+02   7.8709000e+02   2.8800000e+02   6.7316100e+02   2.4990000e+00   9.9800000e-01   1.3226000e+01   1.0300000e+00   3.4927000e+01   6.9200000e-01   9.5400000e-01   9.8500000e-01
   7.1480000e+00   2.1000000e+01   3.8980202e+04   2.6780790e+03   9.1354430e+03   3.3217900e+02   3.3217900e+02   8.4162700e+02   2.8800000e+02   6.9694200e+02   2.9600000e+00   9.9800000e-01   1.5520000e+01   1.0350000e+00   4.4923000e+01   8.8900000e-01   9.5400000e-01   9.8500000e-01
   8.2060000e+00   2.4000000e+01   5.0997360e+04   3.0876180e+03   9.3197450e+03   4.3802700e+02   4.3802700e+02   9.3903200e+02   2.8800000e+02   7.3883100e+02   3.5700000e+00   9.9800000e-01   1.8432000e+01   1.0410000e+00   6.1314000e+01   1.2140000e+00   9.5400000e-01   9.8500000e-01
   9.3000000e+00   2.7000000e+01   7.2770826e+04   3.5604200e+03   9.7816270e+03   6.4506900e+02   6.4506900e+02   1.1021380e+03   2.8800000e+02   7.8618700e+02   4.4900000e+00   9.9800000e-01   2.2564000e+01   1.0490000e+00   9.1179000e+01   1.8050000e+00   9.5400000e-01   9.8500000e-01
   1.1380000e+00   3.0000000e+00   5.3428500e+03   1.4085440e+03   6.7397890e+03   1.1069000e+01   1.1069000e+01   6.0392900e+02   2.8800000e+02   5.7366100e+02   1.2850000e+00   9.9800000e-01   6.9490000e+00   1.0190000e+00   0.0000000e+00   2.4300000e-01   9.5400000e-01   9.8600000e-01
   2.0880000e+00   6.0000000e+00   5.2605950e+03   1.3458320e+03   6.8284960e+03   2.2641000e+01   2.2641000e+01   5.8696800e+02   2.8800000e+02   5.7229800e+02   1.2720000e+00   9.9800000e-01   6.8900000e+00   1.0190000e+00   2.3498000e+01   2.4100000e-01   9.5400000e-01   9.8600000e-01
   3.1440000e+00   9.0000000e+00   8.3798610e+03   1.3867610e+03   7.1309720e+03   6.0356000e+01   6.0356000e+01   5.9508500e+02   2.8800000e+02   5.8505200e+02   1.3880000e+00   9.9800000e-01   7.4950000e+00   1.0200000e+00   1.2644000e+01   2.5000000e-01   9.5400000e-01   9.8600000e-01
   4.1610000e+00   1.2000000e+01   1.4724714e+04   1.5474700e+03   7.8054590e+03   1.1380000e+02   1.1380000e+02   6.4977500e+02   2.8800000e+02   6.1117400e+02   1.6560000e+00   9.9800000e-01   8.9110000e+00   1.0220000e+00   1.7566000e+01   3.4800000e-01   9.5400000e-01   9.8600000e-01
   5.1400000e+00   1.5000000e+01   2.1637099e+04   1.9243300e+03   8.5009100e+03   1.7532700e+02   1.7532700e+02   7.1847400e+02   2.8800000e+02   6.4261300e+02   2.0770000e+00   9.9800000e-01   1.1077000e+01   1.0260000e+00   2.5657000e+01   5.0800000e-01   9.5400000e-01   9.8600000e-01
   6.1750000e+00   1.8000000e+01   2.9795006e+04   2.3073130e+03   8.8353550e+03   2.4629200e+02   2.4629200e+02   7.8598900e+02   2.8800000e+02   6.7294000e+02   2.4990000e+00   9.9800000e-01   1.3212000e+01   1.0300000e+00   3.4855000e+01   6.9000000e-01   9.5400000e-01   9.8600000e-01
   7.1480000e+00   2.1000000e+01   3.8979890e+04   2.6780770e+03   9.1359500e+03   3.3218400e+02   3.3218400e+02   8.4059900e+02   2.8800000e+02   6.9677200e+02   2.9590000e+00   9.9800000e-01   1.5503000e+01   1.0350000e+00   4.4843000e+01   8.8800000e-01   9.5400000e-01   9.8600000e-01
   8.2060000e+00   2.4000000e+01   5.0997233e+04   3.0876170e+03   9.3201030e+03   4.3807300e+02   4.3807300e+02   9.3801000e+02   2.8800000e+02   7.3867000e+02   3.5690000e+00   9.9800000e-01   1.8411000e+01   1.0410000e+00   6.1219000e+01   1.2120000e+00   9.5400000e-01   9.8600000e-01
   9.3000000e+00   2.7000000e+01   7.2771409e+04   3.5604220e+03   9.7823880e+03   6.4477700e+02   6.4477700e+02   1.1012560e+03   2.8800000e+02   7.8604900e+02   4.4890000e+00   9.9800000e-01   2.2537000e+01   1.0490000e+00   9.1074000e+01   1.8030000e+00   9.5400000e-01   9.8600000e-01
   1.1380000e+00   3.0000000e+00   6.4695970e+03   1.3939690e+03   6.7336600e+03   1.0198000e+01   1.0198000e+01   6.3520900e+02   2.8800000e+02   5.7735100e+02   1.3160000e+00   9.9800000e-01   7.1190000e+00   1.0190000e+00   0.0000000e+00   2.8100000e-01   9.5400000e-01   9.8700000e-01
   2.0880000e+00   6.0000000e+00   5.0602880e+03   1.3451650e+03   6.8306210e+03   2.2517000e+01   2.2517000e+01   5.8099100e+02   2.8800000e+02   5.7142300e+02   1.2660000e+00   9.9800000e-01   6.8510000e+00   1.0190000e+00   2.3662000e+01   2.3400000e-01   9.5400000e-01   9.8700000e-01
   3.1440000e+00   9.0000000e+00   8.3800060e+03   1.3867620e+03   7.1335610e+03   6.0358000e+01   6.0358000e+01   5.9427400e+02   2.8800000e+02   5.8490400e+02   1.3880000e+00   9.9800000e-01   7.4880000e+00   1.0200000e+00   1.2610000e+01   2.5000000e-01   9.5400000e-01   9.8700000e-01
   4.1610000e+00   1.2000000e+01   1.4724823e+04   1.5474700e+03   7.8074830e+03   1.1380100e+02   1.1380100e+02   6.4889700e+02   2.8800000e+02   6.1101300e+02   1.6560000e+00   9.9800000e-01   8.9020000e+00   1.0220000e+00   1.7524000e+01   3.4700000e-01   9.5400000e-01   9.8700000e-01
   5.1400000e+00   1.5000000e+01   2.1637158e+04   1.9243330e+03   8.5018210e+03   1.7530800e+02   1.7530800e+02   7.1750300e+02   2.8800000e+02   6.4243200e+02   2.0760000e+00   9.9800000e-01   1.1066000e+01   1.0260000e+00   2.5601000e+01   5.0700000e-01   9.5400000e-01   9.8700000e-01
   6.1750000e+00   1.8000000e+01   2.9795367e+04   2.3073040e+03   8.8363900e+03   2.4627200e+02   2.4627200e+02   7.8489200e+02   2.8800000e+02   6.7272000e+02   2.4990000e+00   9.9800000e-01   1.3199000e+01   1.0300000e+00   3.4783000e+01   6.8900000e-01   9.5400000e-01   9.8700000e-01
   7.1480000e+00   2.1000000e+01   3.8979513e+04   2.6780780e+03   9.1364570e+03   3.3215400e+02   3.3215400e+02   8.3957200e+02   2.8800000e+02   6.9660300e+02   2.9590000e+00   9.9800000e-01   1.5486000e+01   1.0350000e+00   4.4762000e+01   8.8600000e-01   9.5400000e-01   9.8700000e-01
   8.2060000e+00   2.4000000e+01   5.0997097e+04   3.0876160e+03   9.3204610e+03   4.3813000e+02   4.3813000e+02   9.3699200e+02   2.8800000e+02   7.3851000e+02   3.5680000e+00   9.9800000e-01   1.8390000e+01   1.0410000e+00   6.1123000e+01   1.2100000e+00   9.5400000e-01   9.8700000e-01
   9.3000000e+00   2.7000000e+01   7.2772409e+04   3.5604210e+03   9.7831500e+03   6.4508100e+02   6.4508100e+02   1.1003790e+03   2.8800000e+02   7.8591200e+02   4.4880000e+00   9.9800000e-01   2.2510000e+01   1.0490000e+00   9.0970000e+01   1.8010000e+00   9.5400000e-01   9.8700000e-01
   1.1380000e+00   3.0000000e+00   7.2397840e+03   1.3765790e+03   6.7256620e+03   9.1710000e+00   9.1710000e+00   6.5959400e+02   2.8800000e+02   5.7950300e+02   1.3330000e+00   9.9800000e-01   7.2210000e+00   1.0190000e+00   3.9440000e+00   3.1500000e-01   9.5400000e-01   9.8800000e-01
   2.0880000e+00   6.0000000e+00   4.9824870e+03   1.3448540e+03   6.8329760e+03   2.2460000e+01   2.2460000e+01   5.7804800e+02   2.8800000e+02   5.7089300e+02   1.2630000e+00   9.9800000e-01   6.8270000e+00   1.0190000e+00   2.3444000e+01   2.3100000e-01   9.5400000e-01   9.8800000e-01
   3.1440000e+00   9.0000000e+00   8.3800580e+03   1.3867620e+03   7.1361450e+03   6.0371000e+01   6.0371000e+01   5.9346400e+02   2.8800000e+02   5.8475500e+02   1.3880000e+00   9.9800000e-01   7.4810000e+00   1.0200000e+00   1.2577000e+01   2.4900000e-01   9.5400000e-01   9.8800000e-01
   4.1610000e+00   1.2000000e+01   1.4724942e+04   1.5474710e+03   7.8095090e+03   1.1378400e+02   1.1378400e+02   6.4802200e+02   2.8800000e+02   6.1085300e+02   1.6560000e+00   9.9800000e-01   8.8930000e+00   1.0220000e+00   1.7481000e+01   3.4600000e-01   9.5400000e-01   9.8800000e-01
   5.1400000e+00   1.5000000e+01   2.1637507e+04   1.9243340e+03   8.5027400e+03   1.7529000e+02   1.7529000e+02   7.1653600e+02   2.8800000e+02   6.4225200e+02   2.0760000e+00   9.9800000e-01   1.1054000e+01   1.0260000e+00   2.5546000e+01   5.0600000e-01   9.5400000e-01   9.8800000e-01
   6.1750000e+00   1.8000000e+01   2.9795577e+04   2.3072910e+03   8.8374170e+03   2.4625500e+02   2.4625500e+02   7.8379900e+02   2.8800000e+02   6.7250000e+02   2.4980000e+00   9.9800000e-01   1.3185000e+01   1.0300000e+00   3.4711000e+01   6.8700000e-01   9.5400000e-01   9.8800000e-01
   7.1480000e+00   2.1000000e+01   3.8979142e+04   2.6780760e+03   9.1369640e+03   3.3212300e+02   3.3212300e+02   8.3854900e+02   2.8800000e+02   6.9643400e+02   2.9580000e+00   9.9800000e-01   1.5469000e+01   1.0350000e+00   4.4682000e+01   8.8500000e-01   9.5400000e-01   9.8800000e-01
   8.2060000e+00   2.4000000e+01   5.0997003e+04   3.0876130e+03   9.3208180e+03   4.3798100e+02   4.3798100e+02   9.3597600e+02   2.8800000e+02   7.3835100e+02   3.5680000e+00   9.9800000e-01   1.8369000e+01   1.0410000e+00   6.1028000e+01   1.2080000e+00   9.5400000e-01   9.8800000e-01
   9.3000000e+00   2.7000000e+01   7.2773140e+04   3.5604220e+03   9.7839040e+03   6.4504400e+02   6.4504400e+02   1.0995020e+03   2.8800000e+02   7.8577600e+02   4.4870000e+00   9.9800000e-01   2.2483000e+01   1.0490000e+00   9.0866000e+01   1.7990000e+00   9.5400000e-01   9.8800000e-01
   1.1380000e+00   3.0000000e+00   7.3460940e+03   1.3528190e+03   6.7133150e+03   7.8050000e+00   7.8050000e+00   6.6805600e+02   2.8800000e+02   5.7918900e+02   1.3280000e+00   9.9800000e-01   7.2050000e+00   1.0190000e+00   1.6776000e+01   3.3300000e-01   9.5400000e-01   9.8900000e-01
   2.0880000e+00   6.0000000e+00   4.7547230e+03   1.3445050e+03   6.8352960e+03   2.2398000e+01   2.2398000e+01   5.7111700e+02   2.8800000e+02   5.6981100e+02   1.2560000e+00   9.9800000e-01   6.7790000e+00   1.0190000e+00   2.3444000e+01   2.2300000e-01   9.5400000e-01   9.8900000e-01
   3.1440000e+00   9.0000000e+00   8.3801710e+03   1.3867630e+03   7.1387340e+03   6.0372000e+01   6.0372000e+01   5.9265600e+02   2.8800000e+02   5.8460700e+02   1.3880000e+00   9.9800000e-01   7.4730000e+00   1.0200000e+00   1.2543000e+01   2.4800000e-01   9.5400000e-01   9.8900000e-01
   4.1610000e+00   1.2000000e+01   1.4724947e+04   1.5474710e+03   7.8115280e+03   1.1380600e+02   1.1380600e+02   6.4714800e+02   2.8800000e+02   6.1069300e+02   1.6550000e+00   9.9800000e-01   8.8840000e+00   1.0220000e+00   1.7440000e+01   3.4500000e-01   9.5400000e-01   9.8900000e-01
   5.1400000e+00   1.5000000e+01   2.1637597e+04   1.9243360e+03   8.5036520e+03   1.7531200e+02   1.7531200e+02   7.1557000e+02   2.8800000e+02   6.4207200e+02   2.0760000e+00   9.9800000e-01   1.1043000e+01   1.0260000e+00   2.5490000e+01   5.0500000e-01   9.5400000e-01   9.8900000e-01
   6.1750000e+00   1.8000000e+01   2.9795832e+04   2.3072790e+03   8.8384470e+03   2.4626300e+02   2.4626300e+02   7.8270800e+02   2.8800000e+02   6.7228100e+02   2.4980000e+00   9.9800000e-01   1.3172000e+01   1.0300000e+00   3.4640000e+01   6.8600000e-01   9.5400000e-01   9.8900000e-01
   7.1480000e+00   2.1000000e+01   3.8978853e+04   2.6780750e+03   9.1374710e+03   3.3213700e+02   3.3213700e+02   8.3752800e+02   2.8800000e+02   6.9626600e+02   2.9580000e+00   9.9800000e-01   1.5453000e+01   1.0350000e+00   4.4601000e+01   8.8300000e-01   9.5400000e-01   9.8900000e-01
   8.2060000e+00   2.4000000e+01   5.0996909e+04   3.0876100e+03   9.3211750e+03   4.3812900e+02   4.3812900e+02   9.3496300e+02   2.8800000e+02   7.3819200e+02   3.5670000e+00   9.9800000e-01   1.8348000e+01   1.0410000e+00   6.0933000e+01   1.2060000e+00   9.5400000e-01   9.8900000e-01
   9.3000000e+00   2.7000000e+01   7.2773091e+04   3.5604340e+03   9.7846460e+03   6.4481000e+02   6.4481000e+02   1.0986240e+03   2.8800000e+02   7.8563900e+02   4.4860000e+00   9.9800000e-01   2.2456000e+01   1.0490000e+00   9.0761000e+01   1.7970000e+00   9.5400000e-01   9.8900000e-01
   1.1380000e+00   3.0000000e+00   6.7403700e+03   1.3337760e+03   6.7034150e+03   6.7330000e+00   6.7330000e+00   6.5606600e+02   2.8800000e+02   5.7658100e+02   1.3060000e+00   9.9800000e-01   7.0820000e+00   1.0190000e+00   2.5321000e+01   3.2400000e-01   9.5400000e-01   9.9000000e-01
   2.0880000e+00   6.0000000e+00   4.9055440e+03   1.3447410e+03   6.8380530e+03   2.2444000e+01   2.2444000e+01   5.7438100e+02   2.8800000e+02   5.7027800e+02   1.2610000e+00   9.9800000e-01   6.8000000e+00   1.0190000e+00   2.3373000e+01   2.2800000e-01   9.5400000e-01   9.9000000e-01
   3.1440000e+00   9.0000000e+00   8.3802570e+03   1.3867630e+03   7.1413220e+03   6.0366000e+01   6.0366000e+01   5.9184900e+02   2.8800000e+02   5.8445900e+02   1.3880000e+00   9.9800000e-01   7.4660000e+00   1.0200000e+00   1.2509000e+01   2.4800000e-01   9.5400000e-01   9.9000000e-01
   4.1610000e+00   1.2000000e+01   1.4724998e+04   1.5474720e+03   7.8135520e+03   1.1378200e+02   1.1378200e+02   6.4627600e+02   2.8800000e+02   6.1053300e+02   1.6550000e+00   9.9800000e-01   8.8750000e+00   1.0220000e+00   1.7398000e+01   3.4400000e-01   9.5400000e-01   9.9000000e-01
   5.1400000e+00   1.5000000e+01   2.1637864e+04   1.9243370e+03   8.5045690e+03   1.7533600e+02   1.7533600e+02   7.1460800e+02   2.8800000e+02   6.4189300e+02   2.0750000e+00   9.9800000e-01   1.1032000e+01   1.0260000e+00   2.5435000e+01   5.0300000e-01   9.5400000e-01   9.9000000e-01
   6.1750000e+00   1.8000000e+01   2.9796203e+04   2.3072740e+03   8.8394840e+03   2.4628000e+02   2.4628000e+02   7.8162100e+02   2.8800000e+02   6.7206300e+02   2.4980000e+00   9.9800000e-01   1.3158000e+01   1.0300000e+00   3.4569000e+01   6.8400000e-01   9.5400000e-01   9.9000000e-01
   7.1480000e+00   2.1000000e+01   3.8978492e+04   2.6780760e+03   9.1379770e+03   3.3216600e+02   3.3216600e+02   8.3651000e+02   2.8800000e+02   6.9609800e+02   2.9570000e+00   9.9800000e-01   1.5436000e+01   1.0350000e+00   4.4521000e+01   8.8100000e-01   9.5400000e-01   9.9000000e-01
   8.2060000e+00   2.4000000e+01   5.0996773e+04   3.0876090e+03   9.3215310e+03   4.3798300e+02   4.3798300e+02   9.3395400e+02   2.8800000e+02   7.3803400e+02   3.5660000e+00   9.9800000e-01   1.8327000e+01   1.0410000e+00   6.0838000e+01   1.2040000e+00   9.5400000e-01   9.9000000e-01
   9.3000000e+00   2.7000000e+01   7.2774632e+04   3.5604260e+03   9.7854020e+03   6.4500200e+02   6.4500200e+02   1.0977570e+03   2.8800000e+02   7.8550500e+02   4.4840000e+00   9.9800000e-01   2.2429000e+01   1.0490000e+00   9.0658000e+01   1.7950000e+00   9.5400000e-01   9.9000000e-01
   1.1380000e+00   3.0000000e+00   5.0552540e+03   1.3145050e+03   6.6924710e+03   5.6740000e+00   5.6740000e+00   6.1572600e+02   2.8800000e+02   5.7012200e+02   1.2540000e+00   9.9800000e-01   6.7880000e+00   1.0190000e+00   3.2565000e+01   2.8000000e-01   9.5400000e-01   9.9100000e-01
   2.0880000e+00   6.0000000e+00   4.5847890e+03   1.3443110e+03   6.8402630e+03   2.2352000e+01   2.2352000e+01   5.6493100e+02   2.8800000e+02   5.6888400e+02   1.2510000e+00   9.9800000e-01   6.7390000e+00   1.0190000e+00   2.3374000e+01   2.1600000e-01   9.5400000e-01   9.9100000e-01
   3.1440000e+00   9.0000000e+00   8.3803590e+03   1.3867640e+03   7.1439120e+03   6.0369000e+01   6.0369000e+01   5.9104500e+02   2.8800000e+02   5.8431100e+02   1.3870000e+00   9.9800000e-01   7.4590000e+00   1.0200000e+00   1.2476000e+01   2.4700000e-01   9.5400000e-01   9.9100000e-01
   4.1610000e+00   1.2000000e+01   1.4725176e+04   1.5474730e+03   7.8155890e+03   1.1380900e+02   1.1380900e+02   6.4540700e+02   2.8800000e+02   6.1037400e+02   1.6550000e+00   9.9800000e-01   8.8670000e+00   1.0220000e+00   1.7356000e+01   3.4400000e-01   9.5400000e-01   9.9100000e-01
   5.1400000e+00   1.5000000e+01   2.1637951e+04   1.9243390e+03   8.5054810e+03   1.7534600e+02   1.7534600e+02   7.1364700e+02   2.8800000e+02   6.4171300e+02   2.0750000e+00   9.9800000e-01   1.1021000e+01   1.0260000e+00   2.5380000e+01   5.0200000e-01   9.5400000e-01   9.9100000e-01
   6.1750000e+00   1.8000000e+01   2.9796511e+04   2.3072660e+03   8.8405160e+03   2.4631600e+02   2.4631600e+02   7.8053700e+02   2.8800000e+02   6.7184500e+02   2.4970000e+00   9.9800000e-01   1.3144000e+01   1.0300000e+00   3.4498000e+01   6.8300000e-01   9.5400000e-01   9.9100000e-01
   7.1480000e+00   2.1000000e+01   3.8978156e+04   2.6780770e+03   9.1384820e+03   3.3203300e+02   3.3203300e+02   8.3549500e+02   2.8800000e+02   6.9593100e+02   2.9560000e+00   9.9800000e-01   1.5419000e+01   1.0350000e+00   4.4441000e+01   8.8000000e-01   9.5400000e-01   9.9100000e-01
   8.2060000e+00   2.4000000e+01   5.0996355e+04   3.0876000e+03   9.3218970e+03   4.3812600e+02   4.3812600e+02   9.3293400e+02   2.8800000e+02   7.3787600e+02   3.5650000e+00   9.9800000e-01   1.8306000e+01   1.0410000e+00   6.0742000e+01   1.2030000e+00   9.5400000e-01   9.9100000e-01
   9.3000000e+00   2.7000000e+01   7.2774450e+04   3.5604380e+03   9.7861340e+03   6.4496600e+02   6.4496600e+02   1.0968830e+03   2.8800000e+02   7.8537000e+02   4.4830000e+00   9.9800000e-01   2.2403000e+01   1.0490000e+00   9.0554000e+01   1.7930000e+00   9.5400000e-01   9.9100000e-01
   1.1380000e+00   3.0000000e+00   1.6317120e+03   1.3116180e+03   6.6892720e+03   5.4890000e+00   5.4890000e+00   5.1604100e+02   2.8800000e+02   5.5498800e+02   1.1430000e+00   9.9800000e-01   6.1520000e+00   1.0190000e+00   2.8336000e+01   1.6200000e-01   9.5400000e-01   9.9200000e-01
   2.0880000e+00   6.0000000e+00   4.5184270e+03   1.3444130e+03   6.8428640e+03   2.2367000e+01   2.2367000e+01   5.6226200e+02   2.8800000e+02   5.6844900e+02   1.2490000e+00   9.9800000e-01   6.7200000e+00   1.0190000e+00   2.3263000e+01   2.1300000e-01   9.5400000e-01   9.9200000e-01
   3.1440000e+00   9.0000000e+00   8.3804920e+03   1.3867650e+03   7.1465040e+03   6.0369000e+01   6.0369000e+01   5.9024200e+02   2.8800000e+02   5.8416300e+02   1.3870000e+00   9.9800000e-01   7.4520000e+00   1.0200000e+00   1.2442000e+01   2.4600000e-01   9.5400000e-01   9.9200000e-01
   4.1610000e+00   1.2000000e+01   1.4725196e+04   1.5474740e+03   7.8176140e+03   1.1379300e+02   1.1379300e+02   6.4454000e+02   2.8800000e+02   6.1021500e+02   1.6550000e+00   9.9800000e-01   8.8580000e+00   1.0220000e+00   1.7314000e+01   3.4300000e-01   9.5400000e-01   9.9200000e-01
   5.1400000e+00   1.5000000e+01   2.1638197e+04   1.9243410e+03   8.5063980e+03   1.7534500e+02   1.7534500e+02   7.1268900e+02   2.8800000e+02   6.4153500e+02   2.0750000e+00   9.9800000e-01   1.1009000e+01   1.0260000e+00   2.5324000e+01   5.0100000e-01   9.5400000e-01   9.9200000e-01
   6.1750000e+00   1.8000000e+01   2.9796793e+04   2.3072590e+03   8.8415470e+03   2.4634700e+02   2.4634700e+02   7.7945600e+02   2.8800000e+02   6.7162800e+02   2.4970000e+00   9.9800000e-01   1.3131000e+01   1.0300000e+00   3.4427000e+01   6.8200000e-01   9.5400000e-01   9.9200000e-01
   7.1480000e+00   2.1000000e+01   3.8977873e+04   2.6780770e+03   9.1389880e+03   3.3202900e+02   3.3202900e+02   8.3448300e+02   2.8800000e+02   6.9576400e+02   2.9560000e+00   9.9800000e-01   1.5402000e+01   1.0350000e+00   4.4362000e+01   8.7800000e-01   9.5400000e-01   9.9200000e-01
   8.2060000e+00   2.4000000e+01   5.0995504e+04   3.0875810e+03   9.3222850e+03   4.3796900e+02   4.3796900e+02   9.3190300e+02   2.8800000e+02   7.3772100e+02   3.5640000e+00   9.9800000e-01   1.8285000e+01   1.0410000e+00   6.0645000e+01   1.2010000e+00   9.5400000e-01   9.9200000e-01
   9.3000000e+00   2.7000000e+01   7.2776098e+04   3.5604340e+03   9.7868850e+03   6.4487500e+02   6.4487500e+02   1.0960220e+03   2.8800000e+02   7.8523700e+02   4.4820000e+00   9.9800000e-01   2.2376000e+01   1.0490000e+00   9.0451000e+01   1.7910000e+00   9.5400000e-01   9.9200000e-01
   1.1380000e+00   3.0000000e+00   1.1647620e+03   1.3152560e+03   6.6934920e+03   5.6840000e+00   5.6840000e+00   4.9851300e+02   2.8800000e+02   5.5236100e+02   1.1260000e+00   9.9800000e-01   6.0490000e+00   1.0190000e+00   2.5693000e+01   1.4100000e-01   9.5400000e-01   9.9300000e-01
   2.0880000e+00   6.0000000e+00   4.1907140e+03   1.3447570e+03   6.8455970e+03   2.2423000e+01   2.2423000e+01   5.5220400e+02   2.8800000e+02   5.6699300e+02   1.2380000e+00   9.9800000e-01   6.6570000e+00   1.0190000e+00   2.2466000e+01   2.0100000e-01   9.5400000e-01   9.9300000e-01
   3.1440000e+00   9.0000000e+00   8.3805600e+03   1.3867650e+03   7.1490930e+03   6.0373000e+01   6.0373000e+01   5.8944000e+02   2.8800000e+02   5.8401500e+02   1.3870000e+00   9.9800000e-01   7.4450000e+00   1.0200000e+00   1.2409000e+01   2.4600000e-01   9.5400000e-01   9.9300000e-01
   4.1610000e+00   1.2000000e+01   1.4725284e+04   1.5474740e+03   7.8196460e+03   1.1379600e+02   1.1379600e+02   6.4367500e+02   2.8800000e+02   6.1005700e+02   1.6550000e+00   9.9800000e-01   8.8490000e+00   1.0220000e+00   1.7272000e+01   3.4200000e-01   9.5400000e-01   9.9300000e-01
   5.1400000e+00   1.5000000e+01   2.1638201e+04   1.9243430e+03   8.5073090e+03   1.7529900e+02   1.7529900e+02   7.1173200e+02   2.8800000e+02   6.4135600e+02   2.0750000e+00   9.9800000e-01   1.0998000e+01   1.0260000e+00   2.5269000e+01   5.0000000e-01   9.5400000e-01   9.9300000e-01
   6.1750000e+00   1.8000000e+01   2.9797102e+04   2.3072530e+03   8.8425810e+03   2.4629200e+02   2.4629200e+02   7.7837900e+02   2.8800000e+02   6.7141200e+02   2.4970000e+00   9.9800000e-01   1.3118000e+01   1.0300000e+00   3.4356000e+01   6.8000000e-01   9.5400000e-01   9.9300000e-01
   7.1480000e+00   2.1000000e+01   3.8977556e+04   2.6780780e+03   9.1394940e+03   3.3203100e+02   3.3203100e+02   8.3347300e+02   2.8800000e+02   6.9559700e+02   2.9550000e+00   9.9800000e-01   1.5386000e+01   1.0350000e+00   4.4282000e+01   8.7700000e-01   9.5400000e-01   9.9300000e-01
   8.2060000e+00   2.4000000e+01   5.0995133e+04   3.0875680e+03   9.3226830e+03   4.3811500e+02   4.3811500e+02   9.3087900e+02   2.8800000e+02   7.3756800e+02   3.5630000e+00   9.9800000e-01   1.8265000e+01   1.0410000e+00   6.0550000e+01   1.1990000e+00   9.5400000e-01   9.9300000e-01
   9.3000000e+00   2.7000000e+01   7.2776548e+04   3.5604340e+03   9.7876150e+03   6.4482100e+02   6.4482100e+02   1.0951550e+03   2.8800000e+02   7.8510400e+02   4.4810000e+00   9.9800000e-01   2.2349000e+01   1.0490000e+00   9.0348000e+01   1.7880000e+00   9.5400000e-01   9.9300000e-01
   1.1380000e+00   3.0000000e+00   6.7947700e+02   1.3223790e+03   6.6998960e+03   6.0580000e+00   6.0580000e+00   4.7797000e+02   2.8800000e+02   5.4954300e+02   1.1090000e+00   9.9800000e-01   5.9400000e+00   1.0190000e+00   2.0751000e+01   1.1400000e-01   9.5400000e-01   9.9400000e-01
   2.0880000e+00   6.0000000e+00   4.0662890e+03   1.3450620e+03   6.8482940e+03   2.2474000e+01   2.2474000e+01   5.4773400e+02   2.8800000e+02   5.6625600e+02   1.2340000e+00   9.9800000e-01   6.6250000e+00   1.0190000e+00   2.2256000e+01   1.9600000e-01   9.5400000e-01   9.9400000e-01
   3.1440000e+00   9.0000000e+00   8.3807310e+03   1.3867660e+03   7.1516890e+03   6.0380000e+01   6.0380000e+01   5.8864100e+02   2.8800000e+02   5.8386700e+02   1.3870000e+00   9.9800000e-01   7.4380000e+00   1.0200000e+00   1.2376000e+01   2.4500000e-01   9.5400000e-01   9.9400000e-01
   4.1610000e+00   1.2000000e+01   1.4725271e+04   1.5474750e+03   7.8216720e+03   1.1380700e+02   1.1380700e+02   6.4281100e+02   2.8800000e+02   6.0989800e+02   1.6540000e+00   9.9800000e-01   8.8400000e+00   1.0220000e+00   1.7231000e+01   3.4100000e-01   9.5400000e-01   9.9400000e-01
   5.1400000e+00   1.5000000e+01   2.1638485e+04   1.9243450e+03   8.5082280e+03   1.7530300e+02   1.7530300e+02   7.1078000e+02   2.8800000e+02   6.4117800e+02   2.0740000e+00   9.9800000e-01   1.0987000e+01   1.0260000e+00   2.5215000e+01   4.9900000e-01   9.5400000e-01   9.9400000e-01
   6.1750000e+00   1.8000000e+01   2.9797256e+04   2.3072430e+03   8.8436050e+03   2.4634800e+02   2.4634800e+02   7.7730500e+02   2.8800000e+02   6.7119500e+02   2.4960000e+00   9.9800000e-01   1.3104000e+01   1.0300000e+00   3.4286000e+01   6.7900000e-01   9.5400000e-01   9.9400000e-01
   7.1480000e+00   2.1000000e+01   3.8977284e+04   2.6780770e+03   9.1399990e+03   3.3202500e+02   3.3202500e+02   8.3246700e+02   2.8800000e+02   6.9543100e+02   2.9550000e+00   9.9800000e-01   1.5369000e+01   1.0350000e+00   4.4203000e+01   8.7500000e-01   9.5400000e-01   9.9400000e-01
   8.2060000e+00   2.4000000e+01   5.0994961e+04   3.0875600e+03   9.3230840e+03   4.3803800e+02   4.3803800e+02   9.2985900e+02   2.8800000e+02   7.3741600e+02   3.5620000e+00   9.9800000e-01   1.8244000e+01   1.0410000e+00   6.0454000e+01   1.1970000e+00   9.5400000e-01   9.9400000e-01
   9.3000000e+00   2.7000000e+01   7.2776714e+04   3.5604440e+03   9.7883410e+03   6.4499500e+02   6.4499500e+02   1.0942910e+03   2.8800000e+02   7.8497200e+02   4.4790000e+00   9.9800000e-01   2.2323000e+01   1.0490000e+00   9.0245000e+01   1.7860000e+00   9.5400000e-01   9.9400000e-01
   1.1380000e+00   3.0000000e+00   2.8732900e+02   1.3353620e+03   6.7100910e+03   6.7560000e+00   6.7560000e+00   4.5642500e+02   2.8800000e+02   5.4690300e+02   1.0940000e+00   9.9800000e-01   5.8410000e+00   1.0190000e+00   1.2815000e+01   8.4000000e-02   9.5400000e-01   9.9500000e-01
   2.0880000e+00   6.0000000e+00   4.0186480e+03   1.3452990e+03   6.8510160e+03   2.2518000e+01   2.2518000e+01   5.4561900e+02   2.8800000e+02   5.6593900e+02   1.2330000e+00   9.9800000e-01   6.6120000e+00   1.0190000e+00   2.1879000e+01   1.9300000e-01   9.5400000e-01   9.9500000e-01
   3.1440000e+00   9.0000000e+00   8.3808050e+03   1.3867660e+03   7.1542790e+03   6.0373000e+01   6.0373000e+01   5.8784300e+02   2.8800000e+02   5.8372000e+02   1.3870000e+00   9.9800000e-01   7.4310000e+00   1.0200000e+00   1.2342000e+01   2.4400000e-01   9.5400000e-01   9.9500000e-01
   4.1610000e+00   1.2000000e+01   1.4725509e+04   1.5474750e+03   7.8237200e+03   1.1381200e+02   1.1381200e+02   6.4195100e+02   2.8800000e+02   6.0974000e+02   1.6540000e+00   9.9800000e-01   8.8310000e+00   1.0220000e+00   1.7189000e+01   3.4000000e-01   9.5400000e-01   9.9500000e-01
   5.1400000e+00   1.5000000e+01   2.1638390e+04   1.9243480e+03   8.5091360e+03   1.7535000e+02   1.7535000e+02   7.0982700e+02   2.8800000e+02   6.4099900e+02   2.0740000e+00   9.9800000e-01   1.0976000e+01   1.0260000e+00   2.5160000e+01   4.9800000e-01   9.5400000e-01   9.9500000e-01
   6.1750000e+00   1.8000000e+01   2.9797500e+04   2.3072370e+03   8.8446350e+03   2.4636200e+02   2.4636200e+02   7.7623400e+02   2.8800000e+02   6.7098000e+02   2.4960000e+00   9.9800000e-01   1.3091000e+01   1.0300000e+00   3.4215000e+01   6.7700000e-01   9.5400000e-01   9.9500000e-01
   7.1480000e+00   2.1000000e+01   3.8977008e+04   2.6780760e+03   9.1405040e+03   3.3212000e+02   3.3212000e+02   8.3146200e+02   2.8800000e+02   6.9526600e+02   2.9540000e+00   9.9800000e-01   1.5352000e+01   1.0350000e+00   4.4124000e+01   8.7400000e-01   9.5400000e-01   9.9500000e-01
   8.2060000e+00   2.4000000e+01   5.0994812e+04   3.0875570e+03   9.3234850e+03   4.3810400e+02   4.3810400e+02   9.2884200e+02   2.8800000e+02   7.3726500e+02   3.5620000e+00   9.9800000e-01   1.8224000e+01   1.0410000e+00   6.0360000e+01   1.1950000e+00   9.5400000e-01   9.9500000e-01
   9.3000000e+00   2.7000000e+01   7.2778707e+04   3.5604350e+03   9.7890840e+03   6.4511400e+02   6.4511400e+02   1.0934380e+03   2.8800000e+02   7.8484200e+02   4.4780000e+00   9.9800000e-01   2.2296000e+01   1.0490000e+00   9.0144000e+01   1.7840000e+00   9.5400000e-01   9.9500000e-01
   1.1380000e+00   3.0000000e+00   3.2966900e+02   1.3488920e+03   6.7214100e+03   7.5080000e+00   7.5080000e+00   4.5024300e+02   2.8800000e+02   5.4695400e+02   1.0970000e+00   9.9800000e-01   5.8440000e+00   1.0190000e+00   5.4790000e+00   7.1000000e-02   9.5400000e-01   9.9600000e-01
   2.0880000e+00   6.0000000e+00   3.6403380e+03   1.3470000e+03   6.8545310e+03   2.2803000e+01   2.2803000e+01   5.3320900e+02   2.8800000e+02   5.6413800e+02   1.2210000e+00   9.9800000e-01   6.5350000e+00   1.0190000e+00   2.0549000e+01   1.7800000e-01   9.5400000e-01   9.9600000e-01
   3.1440000e+00   9.0000000e+00   8.3808660e+03   1.3867670e+03   7.1568700e+03   6.0369000e+01   6.0369000e+01   5.8704600e+02   2.8800000e+02   5.8357200e+02   1.3870000e+00   9.9800000e-01   7.4230000e+00   1.0200000e+00   1.2309000e+01   2.4400000e-01   9.5400000e-01   9.9600000e-01
   4.1610000e+00   1.2000000e+01   1.4725507e+04   1.5474760e+03   7.8257500e+03   1.1380000e+02   1.1380000e+02   6.4109200e+02   2.8800000e+02   6.0958200e+02   1.6540000e+00   9.9800000e-01   8.8220000e+00   1.0220000e+00   1.7148000e+01   3.3900000e-01   9.5400000e-01   9.9600000e-01
   5.1400000e+00   1.5000000e+01   2.1638725e+04   1.9243490e+03   8.5100560e+03   1.7532500e+02   1.7532500e+02   7.0888000e+02   2.8800000e+02   6.4082200e+02   2.0740000e+00   9.9800000e-01   1.0965000e+01   1.0260000e+00   2.5105000e+01   4.9700000e-01   9.5400000e-01   9.9600000e-01
   6.1750000e+00   1.8000000e+01   2.9797730e+04   2.3072300e+03   8.8456630e+03   2.4630500e+02   2.4630500e+02   7.7516600e+02   2.8800000e+02   6.7076500e+02   2.4960000e+00   9.9800000e-01   1.3077000e+01   1.0300000e+00   3.4145000e+01   6.7600000e-01   9.5400000e-01   9.9600000e-01
   7.1480000e+00   2.1000000e+01   3.8976665e+04   2.6780780e+03   9.1410080e+03   3.3202000e+02   3.3202000e+02   8.3046100e+02   2.8800000e+02   6.9510100e+02   2.9530000e+00   9.9800000e-01   1.5336000e+01   1.0350000e+00   4.4045000e+01   8.7200000e-01   9.5400000e-01   9.9600000e-01
   8.2060000e+00   2.4000000e+01   5.0994730e+04   3.0875510e+03   9.3238860e+03   4.3800000e+02   4.3800000e+02   9.2782900e+02   2.8800000e+02   7.3711400e+02   3.5610000e+00   9.9800000e-01   1.8204000e+01   1.0410000e+00   6.0265000e+01   1.1930000e+00   9.5400000e-01   9.9600000e-01
   9.3000000e+00   2.7000000e+01   7.2779347e+04   3.5604360e+03   9.7898060e+03   6.4514000e+02   6.4514000e+02   1.0925800e+03   2.8800000e+02   7.8471100e+02   4.4770000e+00   9.9800000e-01   2.2270000e+01   1.0490000e+00   9.0041000e+01   1.7820000e+00   9.5400000e-01   9.9600000e-01
   1.1380000e+00   3.0000000e+00   4.1806000e+02   1.3539830e+03   6.7274140e+03   7.7880000e+00   7.7880000e+00   4.5087300e+02   2.8800000e+02   5.4733200e+02   1.1010000e+00   9.9800000e-01   5.8580000e+00   1.0190000e+00   2.4150000e+00   7.0000000e-02   9.5400000e-01   9.9700000e-01
   2.0880000e+00   6.0000000e+00   3.6431490e+03   1.3470100e+03   6.8570910e+03   2.2805000e+01   2.2805000e+01   5.3256100e+02   2.8800000e+02   5.6397800e+02   1.2210000e+00   9.9800000e-01   6.5280000e+00   1.0190000e+00   2.0628000e+01   1.7700000e-01   9.5400000e-01   9.9700000e-01
   3.1440000e+00   9.0000000e+00   8.3809910e+03   1.3867680e+03   7.1594650e+03   6.0370000e+01   6.0370000e+01   5.8625200e+02   2.8800000e+02   5.8342500e+02   1.3870000e+00   9.9800000e-01   7.4160000e+00   1.0200000e+00   1.2276000e+01   2.4300000e-01   9.5400000e-01   9.9700000e-01
   4.1610000e+00   1.2000000e+01   1.4725620e+04   1.5474770e+03   7.8277910e+03   1.1379800e+02   1.1379800e+02   6.4023600e+02   2.8800000e+02   6.0942500e+02   1.6540000e+00   9.9800000e-01   8.8140000e+00   1.0220000e+00   1.7106000e+01   3.3900000e-01   9.5400000e-01   9.9700000e-01
   5.1400000e+00   1.5000000e+01   2.1638905e+04   1.9243500e+03   8.5109730e+03   1.7535600e+02   1.7535600e+02   7.0793400e+02   2.8800000e+02   6.4064500e+02   2.0740000e+00   9.9800000e-01   1.0954000e+01   1.0260000e+00   2.5050000e+01   4.9600000e-01   9.5400000e-01   9.9700000e-01
   6.1750000e+00   1.8000000e+01   2.9797864e+04   2.3072220e+03   8.8466880e+03   2.4631200e+02   2.4631200e+02   7.7410100e+02   2.8800000e+02   6.7055000e+02   2.4950000e+00   9.9800000e-01   1.3064000e+01   1.0300000e+00   3.4075000e+01   6.7500000e-01   9.5400000e-01   9.9700000e-01
   7.1480000e+00   2.1000000e+01   3.8976413e+04   2.6780770e+03   9.1415120e+03   3.3208000e+02   3.3208000e+02   8.2946200e+02   2.8800000e+02   6.9493600e+02   2.9530000e+00   9.9800000e-01   1.5319000e+01   1.0350000e+00   4.3966000e+01   8.7000000e-01   9.5400000e-01   9.9700000e-01
   8.2060000e+00   2.4000000e+01   5.0994618e+04   3.0875500e+03   9.3242870e+03   4.3796100e+02   4.3796100e+02   9.2681800e+02   2.8800000e+02   7.3696400e+02   3.5600000e+00   9.9800000e-01   1.8183000e+01   1.0410000e+00   6.0171000e+01   1.1910000e+00   9.5400000e-01   9.9700000e-01
   9.3000000e+00   2.7000000e+01   7.2779939e+04   3.5604340e+03   9.7905230e+03   6.4498500e+02   6.4498500e+02   1.0917230e+03   2.8800000e+02   7.8458100e+02   4.4760000e+00   9.9800000e-01   2.2243000e+01   1.0490000e+00   8.9939000e+01   1.7800000e+00   9.5400000e-01   9.9700000e-01
   1.1380000e+00   3.0000000e+00   1.0558480e+03   1.3816290e+03   6.7487000e+03   9.3770000e+00   9.3770000e+00   4.6801300e+02   2.8800000e+02   5.5116200e+02   1.1290000e+00   9.9800000e-01   6.0050000e+00   1.0190000e+00   0.0000000e+00   8.8000000e-02   9.5400000e-01   9.9800000e-01
   2.0880000e+00   6.0000000e+00   3.4976350e+03   1.3480520e+03   6.8602820e+03   2.2998000e+01   2.2998000e+01   5.2727100e+02   2.8800000e+02   5.6320100e+02   1.2160000e+00   9.9800000e-01   6.4960000e+00   1.0190000e+00   1.9825000e+01   1.7100000e-01   9.5400000e-01   9.9800000e-01
   3.1440000e+00   9.0000000e+00   8.3810650e+03   1.3867680e+03   7.1620570e+03   6.0375000e+01   6.0375000e+01   5.8545900e+02   2.8800000e+02   5.8327700e+02   1.3870000e+00   9.9800000e-01   7.4090000e+00   1.0200000e+00   1.2243000e+01   2.4200000e-01   9.5400000e-01   9.9800000e-01
   4.1610000e+00   1.2000000e+01   1.4725678e+04   1.5474770e+03   7.8298290e+03   1.1381000e+02   1.1381000e+02   6.3938100e+02   2.8800000e+02   6.0926700e+02   1.6540000e+00   9.9800000e-01   8.8050000e+00   1.0220000e+00   1.7065000e+01   3.3800000e-01   9.5400000e-01   9.9800000e-01
   5.1400000e+00   1.5000000e+01   2.1639224e+04   1.9243520e+03   8.5118930e+03   1.7531700e+02   1.7531700e+02   7.0699100e+02   2.8800000e+02   6.4046900e+02   2.0730000e+00   9.9800000e-01   1.0943000e+01   1.0260000e+00   2.4996000e+01   4.9500000e-01   9.5400000e-01   9.9800000e-01
   6.1750000e+00   1.8000000e+01   2.9798223e+04   2.3072220e+03   8.8477260e+03   2.4634700e+02   2.4634700e+02   7.7303900e+02   2.8800000e+02   6.7033700e+02   2.4950000e+00   9.9800000e-01   1.3051000e+01   1.0300000e+00   3.4005000e+01   6.7300000e-01   9.5400000e-01   9.9800000e-01
   7.1480000e+00   2.1000000e+01   3.8976110e+04   2.6780780e+03   9.1420160e+03   3.3201700e+02   3.3201700e+02   8.2846600e+02   2.8800000e+02   6.9477200e+02   2.9520000e+00   9.9800000e-01   1.5303000e+01   1.0350000e+00   4.3887000e+01   8.6900000e-01   9.5400000e-01   9.9800000e-01
   8.2060000e+00   2.4000000e+01   5.0994543e+04   3.0875480e+03   9.3246870e+03   4.3802200e+02   4.3802200e+02   9.2581100e+02   2.8800000e+02   7.3681500e+02   3.5590000e+00   9.9800000e-01   1.8163000e+01   1.0410000e+00   6.0077000e+01   1.1890000e+00   9.5400000e-01   9.9800000e-01
   9.3000000e+00   2.7000000e+01   7.2780397e+04   3.5604370e+03   9.7912370e+03   6.4500900e+02   6.4500900e+02   1.0908690e+03   2.8800000e+02   7.8445200e+02   4.4750000e+00   9.9800000e-01   2.2217000e+01   1.0490000e+00   8.9837000e+01   1.7780000e+00   9.5400000e-01   9.9800000e-01
   1.1380000e+00   3.0000000e+00   9.8185800e+02   1.3788590e+03   6.7493840e+03   9.2090000e+00   9.2090000e+00   4.6532400e+02   2.8800000e+02   5.5056800e+02   1.1260000e+00   9.9800000e-01   5.9830000e+00   1.0190000e+00   0.0000000e+00   8.5000000e-02   9.5400000e-01   9.9900000e-01
   2.0880000e+00   6.0000000e+00   3.3619940e+03   1.3496060e+03   6.8637900e+03   2.3269000e+01   2.3269000e+01   5.2206200e+02   2.8800000e+02   5.6253500e+02   1.2120000e+00   9.9800000e-01   6.4680000e+00   1.0190000e+00   1.8307000e+01   1.6400000e-01   9.5400000e-01   9.9900000e-01
   3.1440000e+00   9.0000000e+00   8.3811810e+03   1.3867690e+03   7.1646530e+03   6.0384000e+01   6.0384000e+01   5.8466700e+02   2.8800000e+02   5.8313000e+02   1.3870000e+00   9.9800000e-01   7.4020000e+00   1.0200000e+00   1.2210000e+01   2.4200000e-01   9.5400000e-01   9.9900000e-01
   4.1610000e+00   1.2000000e+01   1.4725824e+04   1.5474780e+03   7.8318760e+03   1.1381600e+02   1.1381600e+02   6.3852900e+02   2.8800000e+02   6.0911100e+02   1.6530000e+00   9.9800000e-01   8.7960000e+00   1.0220000e+00   1.7024000e+01   3.3700000e-01   9.5400000e-01   9.9900000e-01
   5.1400000e+00   1.5000000e+01   2.1639153e+04   1.9243550e+03   8.5128030e+03   1.7534300e+02   1.7534300e+02   7.0604800e+02   2.8800000e+02   6.4029200e+02   2.0730000e+00   9.9800000e-01   1.0932000e+01   1.0260000e+00   2.4942000e+01   4.9400000e-01   9.5400000e-01   9.9900000e-01
   6.1750000e+00   1.8000000e+01   2.9798267e+04   2.3072150e+03   8.8487480e+03   2.4636600e+02   2.4636600e+02   7.7198000e+02   2.8800000e+02   6.7012400e+02   2.4950000e+00   9.9800000e-01   1.3037000e+01   1.0300000e+00   3.3936000e+01   6.7200000e-01   9.5400000e-01   9.9900000e-01
   7.1480000e+00   2.1000000e+01   3.8975881e+04   2.6780770e+03   9.1425190e+03   3.3211800e+02   3.3211800e+02   8.2747200e+02   2.8800000e+02   6.9460800e+02   2.9520000e+00   9.9800000e-01   1.5286000e+01   1.0350000e+00   4.3809000e+01   8.6700000e-01   9.5400000e-01   9.9900000e-01
   8.2060000e+00   2.4000000e+01   5.0994493e+04   3.0875450e+03   9.3250860e+03   4.3796900e+02   4.3796900e+02   9.2480700e+02   2.8800000e+02   7.3666700e+02   3.5580000e+00   9.9800000e-01   1.8143000e+01   1.0410000e+00   5.9983000e+01   1.1870000e+00   9.5400000e-01   9.9900000e-01
   9.3000000e+00   2.7000000e+01   7.2780809e+04   3.5604440e+03   9.7919470e+03   6.4515000e+02   6.4515000e+02   1.0900170e+03   2.8800000e+02   7.8432400e+02   4.4730000e+00   9.9800000e-01   2.2191000e+01   1.0490000e+00   8.9735000e+01   1.7760000e+00   9.5400000e-01   9.9900000e-01
   1.1380000e+00   3.0000000e+00   1.4129220e+03   1.3926010e+03   6.7613260e+03   1.0025000e+01   1.0025000e+01   4.7714200e+02   2.8800000e+02   5.5297800e+02   1.1440000e+00   9.9800000e-01   6.0770000e+00   1.0190000e+00   0.0000000e+00   9.9000000e-02   9.5400000e-01   1.0000000e+00
   2.0880000e+00   6.0000000e+00   3.3226300e+03   1.3500340e+03   6.8665630e+03   2.3337000e+01   2.3337000e+01   5.1995300e+02   2.8800000e+02   5.6218600e+02   1.2100000e+00   9.9800000e-01   6.4540000e+00   1.0190000e+00   1.8232000e+01   1.6200000e-01   9.5400000e-01   1.0000000e+00
   3.1440000e+00   9.0000000e+00   8.3813110e+03   1.3867690e+03   7.1672510e+03   6.0380000e+01   6.0380000e+01   5.8387800e+02   2.8800000e+02   5.8298300e+02   1.3860000e+00   9.9800000e-01   7.3950000e+00   1.0200000e+00   1.2177000e+01   2.4100000e-01   9.5400000e-01   1.0000000e+00
   4.1610000e+00   1.2000000e+01   1.4725902e+04   1.5474780e+03   7.8339190e+03   1.1381800e+02   1.1381800e+02   6.3767900e+02   2.8800000e+02   6.0895400e+02   1.6530000e+00   9.9800000e-01   8.7870000e+00   1.0220000e+00   1.6983000e+01   3.3600000e-01   9.5400000e-01   1.0000000e+00
   5.1400000e+00   1.5000000e+01   2.1639191e+04   1.9243570e+03   8.5137160e+03   1.7531600e+02   1.7531600e+02   7.0510800e+02   2.8800000e+02   6.4011600e+02   2.0730000e+00   9.9800000e-01   1.0921000e+01   1.0260000e+00   2.4887000e+01   4.9300000e-01   9.5400000e-01   1.0000000e+00
   6.1750000e+00   1.8000000e+01   2.9798306e+04   2.3072090e+03   8.8497700e+03   2.4638700e+02   2.4638700e+02   7.7092400e+02   2.8800000e+02   6.6991100e+02   2.4940000e+00   9.9800000e-01   1.3024000e+01   1.0300000e+00   3.3867000e+01   6.7100000e-01   9.5400000e-01   1.0000000e+00
   7.1480000e+00   2.1000000e+01   3.8975564e+04   2.6780780e+03   9.1430220e+03   3.3200500e+02   3.3200500e+02   8.2648100e+02   2.8800000e+02   6.9444400e+02   2.9510000e+00   9.9800000e-01   1.5270000e+01   1.0350000e+00   4.3731000e+01   8.6600000e-01   9.5400000e-01   1.0000000e+00
   8.2060000e+00   2.4000000e+01   5.0994371e+04   3.0875450e+03   9.3254850e+03   4.3811400e+02   4.3811400e+02   9.2380600e+02   2.8800000e+02   7.3651900e+02   3.5570000e+00   9.9800000e-01   1.8123000e+01   1.0410000e+00   5.9889000e+01   1.1860000e+00   9.5400000e-01   1.0000000e+00
   9.3000000e+00   2.7000000e+01   7.2782999e+04   3.5604330e+03   9.7926740e+03   6.4518200e+02   6.4518200e+02   1.0891770e+03   2.8800000e+02   7.8419700e+02   4.4720000e+00   9.9800000e-01   2.2164000e+01   1.0490000e+00   8.9635000e+01   1.7740000e+00   9.5400000e-01   1.0000000e+00
   1.1380000e+00   3.0000000e+00   3.4690360e+03   1.3112620e+03   6.6457220e+03   5.5030000e+00   5.5030000e+00   5.8594400e+02   2.8800000e+02   5.6591100e+02   1.2060000e+00   9.9800000e-01   6.6110000e+00   1.0190000e+00   3.3391000e+01   2.4000000e-01   9.5500000e-01   9.7500000e-01
   2.0880000e+00   6.0000000e+00   6.5597370e+03   1.3575870e+03   6.8055820e+03   2.4782000e+01   2.4782000e+01   6.2764300e+02   2.8800000e+02   5.7873400e+02   1.3150000e+00   9.9800000e-01   7.1960000e+00   1.0190000e+00   1.9711000e+01   2.8400000e-01   9.5500000e-01   9.7500000e-01
   3.1440000e+00   9.0000000e+00   8.3786960e+03   1.3867540e+03   7.1002690e+03   6.0353000e+01   6.0353000e+01   6.0365500e+02   2.8800000e+02   5.8647200e+02   1.3890000e+00   9.9800000e-01   7.5760000e+00   1.0200000e+00   1.3000000e+01   2.5700000e-01   9.5500000e-01   9.7500000e-01
   4.1610000e+00   1.2000000e+01   1.4723532e+04   1.5474620e+03   7.7810170e+03   1.1379100e+02   1.1379100e+02   6.5910500e+02   2.8800000e+02   6.1273600e+02   1.6590000e+00   9.9800000e-01   9.0120000e+00   1.0220000e+00   1.8016000e+01   3.5700000e-01   9.5500000e-01   9.7500000e-01
   5.1400000e+00   1.5000000e+01   2.1634835e+04   1.9243110e+03   8.4898950e+03   1.7531400e+02   1.7531400e+02   7.2877100e+02   2.8800000e+02   6.4437200e+02   2.0800000e+00   9.9800000e-01   1.1204000e+01   1.0260000e+00   2.6252000e+01   5.2000000e-01   9.5500000e-01   9.7500000e-01
   6.1750000e+00   1.8000000e+01   2.9791070e+04   2.3074540e+03   8.8228730e+03   2.4626300e+02   2.4626300e+02   7.9774800e+02   2.8800000e+02   6.7515600e+02   2.5030000e+00   9.9800000e-01   1.3366000e+01   1.0300000e+00   3.5631000e+01   7.0500000e-01   9.5500000e-01   9.7500000e-01
   7.1480000e+00   2.1000000e+01   3.8985221e+04   2.6780850e+03   9.1298980e+03   3.3211400e+02   3.3211400e+02   8.5131500e+02   2.8800000e+02   6.9835100e+02   2.9670000e+00   9.9800000e-01   1.5695000e+01   1.0350000e+00   4.5702000e+01   9.0500000e-01   9.5500000e-01   9.7500000e-01
   8.2060000e+00   2.4000000e+01   5.0995885e+04   3.0875250e+03   9.3154650e+03   4.3796300e+02   4.3796300e+02   9.4873200e+02   2.8800000e+02   7.4014500e+02   3.5800000e+00   9.9800000e-01   1.8649000e+01   1.0410000e+00   6.2244000e+01   1.2320000e+00   9.5500000e-01   9.7500000e-01
   9.3000000e+00   2.7000000e+01   7.2761969e+04   3.5603950e+03   9.7725600e+03   6.4496600e+02   6.4496600e+02   1.1099100e+03   2.8800000e+02   7.8724600e+02   4.5040000e+00   9.9800000e-01   2.2844000e+01   1.0490000e+00   9.2160000e+01   1.8240000e+00   9.5500000e-01   9.7500000e-01
   1.1380000e+00   3.0000000e+00   1.2094750e+03   1.3179700e+03   6.6496880e+03   5.8440000e+00   5.8440000e+00   5.1128700e+02   2.8800000e+02   5.5495600e+02   1.1290000e+00   9.9800000e-01   6.1570000e+00   1.0190000e+00   2.6192000e+01   1.5100000e-01   9.5500000e-01   9.7600000e-01
   2.0880000e+00   6.0000000e+00   6.4703470e+03   1.3561150e+03   6.8071780e+03   2.4511000e+01   2.4511000e+01   6.2475500e+02   2.8800000e+02   5.7816100e+02   1.3120000e+00   9.9800000e-01   7.1690000e+00   1.0190000e+00   1.9990000e+01   2.8200000e-01   9.5500000e-01   9.7600000e-01
   3.1440000e+00   9.0000000e+00   8.3787330e+03   1.3867550e+03   7.1028410e+03   6.0348000e+01   6.0348000e+01   6.0282500e+02   2.8800000e+02   5.8632200e+02   1.3890000e+00   9.9800000e-01   7.5690000e+00   1.0200000e+00   1.2966000e+01   2.5700000e-01   9.5500000e-01   9.7600000e-01
   4.1610000e+00   1.2000000e+01   1.4723644e+04   1.5474630e+03   7.7830200e+03   1.1378800e+02   1.1378800e+02   6.5820300e+02   2.8800000e+02   6.1257200e+02   1.6580000e+00   9.9800000e-01   9.0030000e+00   1.0220000e+00   1.7973000e+01   3.5600000e-01   9.5500000e-01   9.7600000e-01
   5.1400000e+00   1.5000000e+01   2.1635094e+04   1.9243120e+03   8.4908090e+03   1.7531400e+02   1.7531400e+02   7.2777400e+02   2.8800000e+02   6.4418700e+02   2.0800000e+00   9.9800000e-01   1.1193000e+01   1.0260000e+00   2.6195000e+01   5.1900000e-01   9.5500000e-01   9.7600000e-01
   6.1750000e+00   1.8000000e+01   2.9791468e+04   2.3074430e+03   8.8239120e+03   2.4622900e+02   2.4622900e+02   7.9661400e+02   2.8800000e+02   6.7492900e+02   2.5030000e+00   9.9800000e-01   1.3352000e+01   1.0300000e+00   3.5557000e+01   7.0400000e-01   9.5500000e-01   9.7600000e-01
   7.1480000e+00   2.1000000e+01   3.8984813e+04   2.6780850e+03   9.1303990e+03   3.3222600e+02   3.3222600e+02   8.5027100e+02   2.8800000e+02   6.9817500e+02   2.9660000e+00   9.9800000e-01   1.5678000e+01   1.0350000e+00   4.5620000e+01   9.0300000e-01   9.5500000e-01   9.7600000e-01
   8.2060000e+00   2.4000000e+01   5.0996382e+04   3.0875500e+03   9.3158410e+03   4.3813100e+02   4.3813100e+02   9.4768200e+02   2.8800000e+02   7.3997800e+02   3.5790000e+00   9.9800000e-01   1.8628000e+01   1.0410000e+00   6.2147000e+01   1.2300000e+00   9.5500000e-01   9.7600000e-01
   9.3000000e+00   2.7000000e+01   7.2763021e+04   3.5603950e+03   9.7733730e+03   6.4473500e+02   6.4473500e+02   1.1090050e+03   2.8800000e+02   7.8709900e+02   4.5030000e+00   9.9800000e-01   2.2816000e+01   1.0490000e+00   9.2053000e+01   1.8220000e+00   9.5500000e-01   9.7600000e-01
   1.1380000e+00   3.0000000e+00   3.5679500e+02   1.3347340e+03   6.6616760e+03   6.7460000e+00   6.7460000e+00   4.7155200e+02   2.8800000e+02   5.4979400e+02   1.0970000e+00   9.9800000e-01   5.9550000e+00   1.0190000e+00   1.5276000e+01   9.8000000e-02   9.5500000e-01   9.7700000e-01
   2.0880000e+00   6.0000000e+00   6.5185530e+03   1.3571720e+03   6.8103590e+03   2.4704000e+01   2.4704000e+01   6.2493700e+02   2.8800000e+02   5.7829500e+02   1.3130000e+00   9.9800000e-01   7.1760000e+00   1.0190000e+00   1.9912000e+01   2.8200000e-01   9.5500000e-01   9.7700000e-01
   3.1440000e+00   9.0000000e+00   8.3788100e+03   1.3867550e+03   7.1054170e+03   6.0349000e+01   6.0349000e+01   6.0199700e+02   2.8800000e+02   5.8617300e+02   1.3890000e+00   9.9800000e-01   7.5620000e+00   1.0200000e+00   1.2932000e+01   2.5600000e-01   9.5500000e-01   9.7700000e-01
   4.1610000e+00   1.2000000e+01   1.4723826e+04   1.5474630e+03   7.7850300e+03   1.1378500e+02   1.1378500e+02   6.5730400e+02   2.8800000e+02   6.1240900e+02   1.6580000e+00   9.9800000e-01   8.9940000e+00   1.0220000e+00   1.7930000e+01   3.5500000e-01   9.5500000e-01   9.7700000e-01
   5.1400000e+00   1.5000000e+01   2.1635199e+04   1.9243140e+03   8.4917180e+03   1.7526700e+02   1.7526700e+02   7.2677800e+02   2.8800000e+02   6.4400300e+02   2.0790000e+00   9.9800000e-01   1.1181000e+01   1.0260000e+00   2.6138000e+01   5.1700000e-01   9.5500000e-01   9.7700000e-01
   6.1750000e+00   1.8000000e+01   2.9791848e+04   2.3074340e+03   8.8249500e+03   2.4620300e+02   2.4620300e+02   7.9548300e+02   2.8800000e+02   6.7470300e+02   2.5030000e+00   9.9800000e-01   1.3338000e+01   1.0300000e+00   3.5483000e+01   7.0300000e-01   9.5500000e-01   9.7700000e-01
   7.1480000e+00   2.1000000e+01   3.8984370e+04   2.6780870e+03   9.1308990e+03   3.3222800e+02   3.3222800e+02   8.4923000e+02   2.8800000e+02   6.9800000e+02   2.9660000e+00   9.9800000e-01   1.5661000e+01   1.0350000e+00   4.5538000e+01   9.0200000e-01   9.5500000e-01   9.7700000e-01
   8.2060000e+00   2.4000000e+01   5.0996820e+04   3.0875690e+03   9.3162160e+03   4.3809400e+02   4.3809400e+02   9.4663400e+02   2.8800000e+02   7.3981300e+02   3.5780000e+00   9.9800000e-01   1.8606000e+01   1.0410000e+00   6.2049000e+01   1.2280000e+00   9.5500000e-01   9.7700000e-01
   9.3000000e+00   2.7000000e+01   7.2764217e+04   3.5603930e+03   9.7741820e+03   6.4500000e+02   6.4500000e+02   1.1081030e+03   2.8800000e+02   7.8695300e+02   4.5010000e+00   9.9800000e-01   2.2789000e+01   1.0490000e+00   9.1946000e+01   1.8200000e+00   9.5500000e-01   9.7700000e-01
   1.1380000e+00   3.0000000e+00   3.5127000e+02   1.3518410e+03   6.6754070e+03   7.6960000e+00   7.6960000e+00   4.6123800e+02   2.8800000e+02   5.4948900e+02   1.0980000e+00   9.9800000e-01   5.9450000e+00   1.0190000e+00   5.6620000e+00   7.9000000e-02   9.5500000e-01   9.7800000e-01
   2.0880000e+00   6.0000000e+00   6.2827310e+03   1.3537220e+03   6.8107680e+03   2.4075000e+01   2.4075000e+01   6.1872800e+02   2.8800000e+02   5.7724100e+02   1.3060000e+00   9.9800000e-01   7.1260000e+00   1.0190000e+00   2.1343000e+01   2.7500000e-01   9.5500000e-01   9.7800000e-01
   3.1440000e+00   9.0000000e+00   8.3788990e+03   1.3867560e+03   7.1079940e+03   6.0351000e+01   6.0351000e+01   6.0117100e+02   2.8800000e+02   5.8602300e+02   1.3890000e+00   9.9800000e-01   7.5540000e+00   1.0200000e+00   1.2898000e+01   2.5500000e-01   9.5500000e-01   9.7800000e-01
   4.1610000e+00   1.2000000e+01   1.4723819e+04   1.5474640e+03   7.7870260e+03   1.1379000e+02   1.1379000e+02   6.5640600e+02   2.8800000e+02   6.1224600e+02   1.6580000e+00   9.9800000e-01   8.9850000e+00   1.0220000e+00   1.7887000e+01   3.5400000e-01   9.5500000e-01   9.7800000e-01
   5.1400000e+00   1.5000000e+01   2.1635539e+04   1.9243150e+03   8.4926350e+03   1.7532000e+02   1.7532000e+02   7.2578700e+02   2.8800000e+02   6.4381900e+02   2.0790000e+00   9.9800000e-01   1.1170000e+01   1.0260000e+00   2.6082000e+01   5.1600000e-01   9.5500000e-01   9.7800000e-01
   6.1750000e+00   1.8000000e+01   2.9792107e+04   2.3074150e+03   8.8259810e+03   2.4627000e+02   2.4627000e+02   7.9435500e+02   2.8800000e+02   6.7447700e+02   2.5020000e+00   9.9800000e-01   1.3324000e+01   1.0300000e+00   3.5410000e+01   7.0100000e-01   9.5500000e-01   9.7800000e-01
   7.1480000e+00   2.1000000e+01   3.8984008e+04   2.6780880e+03   9.1314000e+03   3.3221700e+02   3.3221700e+02   8.4819300e+02   2.8800000e+02   6.9782600e+02   2.9650000e+00   9.9800000e-01   1.5643000e+01   1.0350000e+00   4.5456000e+01   9.0000000e-01   9.5500000e-01   9.7800000e-01
   8.2060000e+00   2.4000000e+01   5.0997093e+04   3.0875870e+03   9.3165870e+03   4.3809000e+02   4.3809000e+02   9.4558900e+02   2.8800000e+02   7.3964700e+02   3.5770000e+00   9.9800000e-01   1.8585000e+01   1.0410000e+00   6.1952000e+01   1.2260000e+00   9.5500000e-01   9.7800000e-01
   9.3000000e+00   2.7000000e+01   7.2764623e+04   3.5604040e+03   9.7749800e+03   6.4495800e+02   6.4495800e+02   1.1072010e+03   2.8800000e+02   7.8680700e+02   4.5000000e+00   9.9800000e-01   2.2761000e+01   1.0490000e+00   9.1839000e+01   1.8180000e+00   9.5500000e-01   9.7800000e-01
   1.1380000e+00   3.0000000e+00   8.3908000e+02   1.3740120e+03   6.6932390e+03   8.9570000e+00   8.9570000e+00   4.7305700e+02   2.8800000e+02   5.5233600e+02   1.1200000e+00   9.9800000e-01   6.0560000e+00   1.0190000e+00   0.0000000e+00   8.9000000e-02   9.5500000e-01   9.7900000e-01
   2.0880000e+00   6.0000000e+00   6.2487060e+03   1.3531390e+03   6.8129520e+03   2.3968000e+01   2.3968000e+01   6.1706500e+02   2.8800000e+02   5.7692900e+02   1.3040000e+00   9.9800000e-01   7.1120000e+00   1.0190000e+00   2.1388000e+01   2.7400000e-01   9.5500000e-01   9.7900000e-01
   3.1440000e+00   9.0000000e+00   8.3790560e+03   1.3867560e+03   7.1105770e+03   6.0352000e+01   6.0352000e+01   6.0034700e+02   2.8800000e+02   5.8587400e+02   1.3890000e+00   9.9800000e-01   7.5470000e+00   1.0200000e+00   1.2864000e+01   2.5500000e-01   9.5500000e-01   9.7900000e-01
   4.1610000e+00   1.2000000e+01   1.4723934e+04   1.5474650e+03   7.7890340e+03   1.1379500e+02   1.1379500e+02   6.5551200e+02   2.8800000e+02   6.1208300e+02   1.6580000e+00   9.9800000e-01   8.9750000e+00   1.0220000e+00   1.7844000e+01   3.5300000e-01   9.5500000e-01   9.7900000e-01
   5.1400000e+00   1.5000000e+01   2.1635744e+04   1.9243160e+03   8.4935470e+03   1.7528100e+02   1.7528100e+02   7.2479800e+02   2.8800000e+02   6.4363600e+02   2.0790000e+00   9.9800000e-01   1.1158000e+01   1.0260000e+00   2.6025000e+01   5.1500000e-01   9.5500000e-01   9.7900000e-01
   6.1750000e+00   1.8000000e+01   2.9792513e+04   2.3074070e+03   8.8270210e+03   2.4620900e+02   2.4620900e+02   7.9323100e+02   2.8800000e+02   6.7425200e+02   2.5020000e+00   9.9800000e-01   1.3310000e+01   1.0300000e+00   3.5337000e+01   7.0000000e-01   9.5500000e-01   9.7900000e-01
   7.1480000e+00   2.1000000e+01   3.8983589e+04   2.6780880e+03   9.1319000e+03   3.3211600e+02   3.3211600e+02   8.4715700e+02   2.8800000e+02   6.9765200e+02   2.9640000e+00   9.9800000e-01   1.5626000e+01   1.0350000e+00   4.5375000e+01   8.9800000e-01   9.5500000e-01   9.7900000e-01
   8.2060000e+00   2.4000000e+01   5.0997327e+04   3.0876000e+03   9.3169570e+03   4.3813400e+02   4.3813400e+02   9.4454700e+02   2.8800000e+02   7.3948300e+02   3.5760000e+00   9.9800000e-01   1.8563000e+01   1.0410000e+00   6.1855000e+01   1.2250000e+00   9.5500000e-01   9.7900000e-01
   9.3000000e+00   2.7000000e+01   7.2764991e+04   3.5604100e+03   9.7757700e+03   6.4477600e+02   6.4477600e+02   1.1063000e+03   2.8800000e+02   7.8666200e+02   4.4990000e+00   9.9800000e-01   2.2734000e+01   1.0490000e+00   9.1732000e+01   1.8160000e+00   9.5500000e-01   9.7900000e-01
   1.1380000e+00   3.0000000e+00   1.2049070e+03   1.3869980e+03   6.7047430e+03   9.7160000e+00   9.7160000e+00   4.8320500e+02   2.8800000e+02   5.5445900e+02   1.1360000e+00   9.9800000e-01   6.1400000e+00   1.0190000e+00   0.0000000e+00   1.0000000e-01   9.5500000e-01   9.8000000e-01
   2.0880000e+00   6.0000000e+00   6.0916900e+03   1.3512840e+03   6.8143660e+03   2.3631000e+01   2.3631000e+01   6.1248800e+02   2.8800000e+02   5.7616500e+02   1.2990000e+00   9.9800000e-01   7.0760000e+00   1.0190000e+00   2.2047000e+01   2.6900000e-01   9.5500000e-01   9.8000000e-01
   3.1440000e+00   9.0000000e+00   8.3791070e+03   1.3867570e+03   7.1131530e+03   6.0352000e+01   6.0352000e+01   5.9952400e+02   2.8800000e+02   5.8572500e+02   1.3890000e+00   9.9800000e-01   7.5390000e+00   1.0200000e+00   1.2830000e+01   2.5400000e-01   9.5500000e-01   9.8000000e-01
   4.1610000e+00   1.2000000e+01   1.4724031e+04   1.5474650e+03   7.7910420e+03   1.1377100e+02   1.1377100e+02   6.5461900e+02   2.8800000e+02   6.1192000e+02   1.6580000e+00   9.9800000e-01   8.9660000e+00   1.0220000e+00   1.7802000e+01   3.5200000e-01   9.5500000e-01   9.8000000e-01
   5.1400000e+00   1.5000000e+01   2.1635849e+04   1.9243180e+03   8.4944580e+03   1.7532000e+02   1.7532000e+02   7.2381000e+02   2.8800000e+02   6.4345300e+02   2.0790000e+00   9.9800000e-01   1.1147000e+01   1.0260000e+00   2.5969000e+01   5.1400000e-01   9.5500000e-01   9.8000000e-01
   6.1750000e+00   1.8000000e+01   2.9792720e+04   2.3073870e+03   8.8280490e+03   2.4628100e+02   2.4628100e+02   7.9211000e+02   2.8800000e+02   6.7402700e+02   2.5020000e+00   9.9800000e-01   1.3297000e+01   1.0300000e+00   3.5264000e+01   6.9800000e-01   9.5500000e-01   9.8000000e-01
   7.1480000e+00   2.1000000e+01   3.8983060e+04   2.6780880e+03   9.1324020e+03   3.3221700e+02   3.3221700e+02   8.4612100e+02   2.8800000e+02   6.9747800e+02   2.9640000e+00   9.9800000e-01   1.5609000e+01   1.0350000e+00   4.5294000e+01   8.9700000e-01   9.5500000e-01   9.8000000e-01
   8.2060000e+00   2.4000000e+01   5.0997452e+04   3.0876100e+03   9.3173240e+03   4.3813600e+02   4.3813600e+02   9.4350800e+02   2.8800000e+02   7.3931800e+02   3.5750000e+00   9.9800000e-01   1.8542000e+01   1.0410000e+00   6.1758000e+01   1.2230000e+00   9.5500000e-01   9.8000000e-01
   9.3000000e+00   2.7000000e+01   7.2766446e+04   3.5604080e+03   9.7765700e+03   6.4506100e+02   6.4506100e+02   1.1054080e+03   2.8800000e+02   7.8651900e+02   4.4980000e+00   9.9800000e-01   2.2707000e+01   1.0490000e+00   9.1627000e+01   1.8140000e+00   9.5500000e-01   9.8000000e-01
   1.1380000e+00   3.0000000e+00   1.7519600e+03   1.4009180e+03   6.7170960e+03   1.0553000e+01   1.0553000e+01   4.9923600e+02   2.8800000e+02   5.5751200e+02   1.1600000e+00   9.9800000e-01   6.2630000e+00   1.0190000e+00   0.0000000e+00   1.1900000e-01   9.5500000e-01   9.8100000e-01
   2.0880000e+00   6.0000000e+00   5.9604070e+03   1.3502240e+03   6.8162500e+03   2.3448000e+01   2.3448000e+01   6.0843000e+02   2.8800000e+02   5.7552300e+02   1.2950000e+00   9.9800000e-01   7.0460000e+00   1.0190000e+00   2.2438000e+01   2.6500000e-01   9.5500000e-01   9.8100000e-01
   3.1440000e+00   9.0000000e+00   8.3792550e+03   1.3867570e+03   7.1157370e+03   6.0355000e+01   6.0355000e+01   5.9870300e+02   2.8800000e+02   5.8557600e+02   1.3890000e+00   9.9800000e-01   7.5320000e+00   1.0200000e+00   1.2796000e+01   2.5300000e-01   9.5500000e-01   9.8100000e-01
   4.1610000e+00   1.2000000e+01   1.4724099e+04   1.5474660e+03   7.7930490e+03   1.1379600e+02   1.1379600e+02   6.5372800e+02   2.8800000e+02   6.1175800e+02   1.6570000e+00   9.9800000e-01   8.9570000e+00   1.0220000e+00   1.7759000e+01   3.5200000e-01   9.5500000e-01   9.8100000e-01
   5.1400000e+00   1.5000000e+01   2.1635888e+04   1.9243210e+03   8.4953670e+03   1.7527800e+02   1.7527800e+02   7.2282400e+02   2.8800000e+02   6.4326900e+02   2.0780000e+00   9.9800000e-01   1.1135000e+01   1.0260000e+00   2.5912000e+01   5.1300000e-01   9.5500000e-01   9.8100000e-01
   6.1750000e+00   1.8000000e+01   2.9793185e+04   2.3073810e+03   8.8290910e+03   2.4623200e+02   2.4623200e+02   7.9099300e+02   2.8800000e+02   6.7380300e+02   2.5010000e+00   9.9800000e-01   1.3283000e+01   1.0300000e+00   3.5191000e+01   6.9700000e-01   9.5500000e-01   9.8100000e-01
   7.1480000e+00   2.1000000e+01   3.8982453e+04   2.6780810e+03   9.1329120e+03   3.3212300e+02   3.3212300e+02   8.4507900e+02   2.8800000e+02   6.9730700e+02   2.9630000e+00   9.9800000e-01   1.5592000e+01   1.0350000e+00   4.5212000e+01   8.9500000e-01   9.5500000e-01   9.8100000e-01
   8.2060000e+00   2.4000000e+01   5.0997534e+04   3.0876170e+03   9.3176900e+03   4.3799400e+02   4.3799400e+02   9.4247200e+02   2.8800000e+02   7.3915400e+02   3.5750000e+00   9.9800000e-01   1.8521000e+01   1.0410000e+00   6.1661000e+01   1.2210000e+00   9.5500000e-01   9.8100000e-01
   9.3000000e+00   2.7000000e+01   7.2766933e+04   3.5604110e+03   9.7773530e+03   6.4502000e+02   6.4502000e+02   1.1045120e+03   2.8800000e+02   7.8637600e+02   4.4970000e+00   9.9800000e-01   2.2679000e+01   1.0490000e+00   9.1521000e+01   1.8120000e+00   9.5500000e-01   9.8100000e-01
   1.1380000e+00   3.0000000e+00   2.3576210e+03   1.4112110e+03   6.7270440e+03   1.1187000e+01   1.1187000e+01   5.1721100e+02   2.8800000e+02   5.6070300e+02   1.1840000e+00   9.9800000e-01   6.3940000e+00   1.0190000e+00   0.0000000e+00   1.3900000e-01   9.5500000e-01   9.8200000e-01
   2.0880000e+00   6.0000000e+00   5.8570500e+03   1.3495160e+03   6.8183190e+03   2.3319000e+01   2.3319000e+01   6.0494600e+02   2.8800000e+02   5.7491100e+02   1.2920000e+00   9.9800000e-01   7.0180000e+00   1.0190000e+00   2.2271000e+01   2.6100000e-01   9.5500000e-01   9.8200000e-01
   3.1440000e+00   9.0000000e+00   8.3792920e+03   1.3867580e+03   7.1183140e+03   6.0354000e+01   6.0354000e+01   5.9788300e+02   2.8800000e+02   5.8542600e+02   1.3890000e+00   9.9800000e-01   7.5250000e+00   1.0200000e+00   1.2762000e+01   2.5300000e-01   9.5500000e-01   9.8200000e-01
   4.1610000e+00   1.2000000e+01   1.4724170e+04   1.5474670e+03   7.7950590e+03   1.1379600e+02   1.1379600e+02   6.5284000e+02   2.8800000e+02   6.1159600e+02   1.6570000e+00   9.9800000e-01   8.9480000e+00   1.0220000e+00   1.7716000e+01   3.5100000e-01   9.5500000e-01   9.8200000e-01
   5.1400000e+00   1.5000000e+01   2.1636095e+04   1.9243220e+03   8.4962810e+03   1.7532200e+02   1.7532200e+02   7.2184200e+02   2.8800000e+02   6.4308700e+02   2.0780000e+00   9.9800000e-01   1.1124000e+01   1.0260000e+00   2.5856000e+01   5.1200000e-01   9.5500000e-01   9.8200000e-01
   6.1750000e+00   1.8000000e+01   2.9793467e+04   2.3073670e+03   8.8301240e+03   2.4622500e+02   2.4622500e+02   7.8987900e+02   2.8800000e+02   6.7358000e+02   2.5010000e+00   9.9800000e-01   1.3269000e+01   1.0300000e+00   3.5118000e+01   6.9500000e-01   9.5500000e-01   9.8200000e-01
   7.1480000e+00   2.1000000e+01   3.8981909e+04   2.6780790e+03   9.1334220e+03   3.3210200e+02   3.3210200e+02   8.4404100e+02   2.8800000e+02   6.9713600e+02   2.9620000e+00   9.9800000e-01   1.5575000e+01   1.0350000e+00   4.5131000e+01   8.9400000e-01   9.5500000e-01   9.8200000e-01
   8.2060000e+00   2.4000000e+01   5.0997545e+04   3.0876210e+03   9.3180530e+03   4.3811700e+02   4.3811700e+02   9.4143800e+02   2.8800000e+02   7.3899100e+02   3.5740000e+00   9.9800000e-01   1.8499000e+01   1.0410000e+00   6.1564000e+01   1.2190000e+00   9.5500000e-01   9.8200000e-01
   9.3000000e+00   2.7000000e+01   7.2767881e+04   3.5604140e+03   9.7781390e+03   6.4509900e+02   6.4509900e+02   1.1036220e+03   2.8800000e+02   7.8623400e+02   4.4950000e+00   9.9800000e-01   2.2652000e+01   1.0490000e+00   9.1415000e+01   1.8100000e+00   9.5500000e-01   9.8200000e-01
   1.1380000e+00   3.0000000e+00   2.6988710e+03   1.4148400e+03   6.7322100e+03   1.1408000e+01   1.1408000e+01   5.2707000e+02   2.8800000e+02   5.6238900e+02   1.1970000e+00   9.9800000e-01   6.4650000e+00   1.0190000e+00   0.0000000e+00   1.5100000e-01   9.5500000e-01   9.8300000e-01
   2.0880000e+00   6.0000000e+00   5.7221460e+03   1.3484300e+03   6.8202060e+03   2.3111000e+01   2.3111000e+01   6.0092000e+02   2.8800000e+02   5.7435100e+02   1.2870000e+00   9.9800000e-01   6.9930000e+00   1.0190000e+00   2.3068000e+01   2.5700000e-01   9.5500000e-01   9.8300000e-01
   3.1440000e+00   9.0000000e+00   8.3794530e+03   1.3867590e+03   7.1208990e+03   6.0358000e+01   6.0358000e+01   5.9706600e+02   2.8800000e+02   5.8527800e+02   1.3880000e+00   9.9800000e-01   7.5170000e+00   1.0200000e+00   1.2728000e+01   2.5200000e-01   9.5500000e-01   9.8300000e-01
   4.1610000e+00   1.2000000e+01   1.4724365e+04   1.5474670e+03   7.7970800e+03   1.1379300e+02   1.1379300e+02   6.5195400e+02   2.8800000e+02   6.1143500e+02   1.6570000e+00   9.9800000e-01   8.9390000e+00   1.0220000e+00   1.7674000e+01   3.5000000e-01   9.5500000e-01   9.8300000e-01
   5.1400000e+00   1.5000000e+01   2.1636432e+04   1.9243230e+03   8.4971980e+03   1.7533000e+02   1.7533000e+02   7.2086400e+02   2.8800000e+02   6.4290600e+02   2.0780000e+00   9.9800000e-01   1.1113000e+01   1.0260000e+00   2.5800000e+01   5.1100000e-01   9.5500000e-01   9.8300000e-01
   6.1750000e+00   1.8000000e+01   2.9793790e+04   2.3073540e+03   8.8311570e+03   2.4630400e+02   2.4630400e+02   7.8876800e+02   2.8800000e+02   6.7335700e+02   2.5010000e+00   9.9800000e-01   1.3255000e+01   1.0300000e+00   3.5046000e+01   6.9400000e-01   9.5500000e-01   9.8300000e-01
   7.1480000e+00   2.1000000e+01   3.8981566e+04   2.6780790e+03   9.1339300e+03   3.3207700e+02   3.3207700e+02   8.4300400e+02   2.8800000e+02   6.9696500e+02   2.9620000e+00   9.9800000e-01   1.5558000e+01   1.0350000e+00   4.5049000e+01   8.9200000e-01   9.5500000e-01   9.8300000e-01
   8.2060000e+00   2.4000000e+01   5.0997466e+04   3.0876200e+03   9.3184140e+03   4.3809200e+02   4.3809200e+02   9.4040700e+02   2.8800000e+02   7.3882800e+02   3.5730000e+00   9.9800000e-01   1.8478000e+01   1.0410000e+00   6.1468000e+01   1.2170000e+00   9.5500000e-01   9.8300000e-01
   9.3000000e+00   2.7000000e+01   7.2769266e+04   3.5604150e+03   9.7789270e+03   6.4485300e+02   6.4485300e+02   1.1027380e+03   2.8800000e+02   7.8609400e+02   4.4940000e+00   9.9800000e-01   2.2625000e+01   1.0490000e+00   9.1310000e+01   1.8080000e+00   9.5500000e-01   9.8300000e-01
   1.1380000e+00   3.0000000e+00   3.4301920e+03   1.4182560e+03   6.7375540e+03   1.1630000e+01   1.1630000e+01   5.4862600e+02   2.8800000e+02   5.6577800e+02   1.2240000e+00   9.9800000e-01   6.6090000e+00   1.0190000e+00   0.0000000e+00   1.7600000e-01   9.5500000e-01   9.8400000e-01
   2.0880000e+00   6.0000000e+00   5.4026240e+03   1.3465150e+03   6.8215450e+03   2.2771000e+01   2.2771000e+01   5.9197500e+02   2.8800000e+02   5.7296000e+02   1.2770000e+00   9.9800000e-01   6.9290000e+00   1.0190000e+00   2.3520000e+01   2.4700000e-01   9.5500000e-01   9.8400000e-01
   3.1440000e+00   9.0000000e+00   8.3795290e+03   1.3867590e+03   7.1234800e+03   6.0357000e+01   6.0357000e+01   5.9625000e+02   2.8800000e+02   5.8512900e+02   1.3880000e+00   9.9800000e-01   7.5100000e+00   1.0200000e+00   1.2694000e+01   2.5100000e-01   9.5500000e-01   9.8400000e-01
   4.1610000e+00   1.2000000e+01   1.4724396e+04   1.5474680e+03   7.7990910e+03   1.1379800e+02   1.1379800e+02   6.5107000e+02   2.8800000e+02   6.1127300e+02   1.6570000e+00   9.9800000e-01   8.9300000e+00   1.0220000e+00   1.7632000e+01   3.4900000e-01   9.5500000e-01   9.8400000e-01
   5.1400000e+00   1.5000000e+01   2.1636497e+04   1.9243260e+03   8.4981070e+03   1.7531900e+02   1.7531900e+02   7.1988600e+02   2.8800000e+02   6.4272300e+02   2.0770000e+00   9.9800000e-01   1.1101000e+01   1.0260000e+00   2.5744000e+01   5.1000000e-01   9.5500000e-01   9.8400000e-01
   6.1750000e+00   1.8000000e+01   2.9794010e+04   2.3073380e+03   8.8321860e+03   2.4623700e+02   2.4623700e+02   7.8766100e+02   2.8800000e+02   6.7313500e+02   2.5000000e+00   9.9800000e-01   1.3242000e+01   1.0300000e+00   3.4973000e+01   6.9200000e-01   9.5500000e-01   9.8400000e-01
   7.1480000e+00   2.1000000e+01   3.8981176e+04   2.6780780e+03   9.1344380e+03   3.3208000e+02   3.3208000e+02   8.4197000e+02   2.8800000e+02   6.9679400e+02   2.9610000e+00   9.9800000e-01   1.5541000e+01   1.0350000e+00   4.4968000e+01   8.9000000e-01   9.5500000e-01   9.8400000e-01
   8.2060000e+00   2.4000000e+01   5.0997371e+04   3.0876170e+03   9.3187740e+03   4.3798800e+02   4.3798800e+02   9.3937900e+02   2.8800000e+02   7.3866600e+02   3.5720000e+00   9.9800000e-01   1.8457000e+01   1.0410000e+00   6.1371000e+01   1.2150000e+00   9.5500000e-01   9.8400000e-01
   9.3000000e+00   2.7000000e+01   7.2769711e+04   3.5604150e+03   9.7796960e+03   6.4500400e+02   6.4500400e+02   1.1018490e+03   2.8800000e+02   7.8595300e+02   4.4930000e+00   9.9800000e-01   2.2598000e+01   1.0490000e+00   9.1205000e+01   1.8050000e+00   9.5500000e-01   9.8400000e-01
   1.1380000e+00   3.0000000e+00   4.2932270e+03   1.4165260e+03   6.7395410e+03   1.1538000e+01   1.1538000e+01   5.7401600e+02   2.8800000e+02   5.6929300e+02   1.2530000e+00   9.9800000e-01   6.7620000e+00   1.0190000e+00   0.0000000e+00   2.0600000e-01   9.5500000e-01   9.8500000e-01
   2.0880000e+00   6.0000000e+00   5.1772990e+03   1.3455890e+03   6.8235030e+03   2.2600000e+01   2.2600000e+01   5.8509600e+02   2.8800000e+02   5.7192300e+02   1.2700000e+00   9.9800000e-01   6.8830000e+00   1.0190000e+00   2.3533000e+01   2.3900000e-01   9.5500000e-01   9.8500000e-01
   3.1440000e+00   9.0000000e+00   8.3796010e+03   1.3867600e+03   7.1260620e+03   6.0355000e+01   6.0355000e+01   5.9543600e+02   2.8800000e+02   5.8498000e+02   1.3880000e+00   9.9800000e-01   7.5030000e+00   1.0200000e+00   1.2661000e+01   2.5100000e-01   9.5500000e-01   9.8500000e-01
   4.1610000e+00   1.2000000e+01   1.4724472e+04   1.5474680e+03   7.8011060e+03   1.1378900e+02   1.1378900e+02   6.5018800e+02   2.8800000e+02   6.1111200e+02   1.6560000e+00   9.9800000e-01   8.9210000e+00   1.0220000e+00   1.7589000e+01   3.4800000e-01   9.5500000e-01   9.8500000e-01
   5.1400000e+00   1.5000000e+01   2.1636611e+04   1.9243280e+03   8.4990180e+03   1.7531700e+02   1.7531700e+02   7.1891000e+02   2.8800000e+02   6.4254200e+02   2.0770000e+00   9.9800000e-01   1.1090000e+01   1.0260000e+00   2.5688000e+01   5.0800000e-01   9.5500000e-01   9.8500000e-01
   6.1750000e+00   1.8000000e+01   2.9794279e+04   2.3073260e+03   8.8332170e+03   2.4630800e+02   2.4630800e+02   7.8655700e+02   2.8800000e+02   6.7291300e+02   2.5000000e+00   9.9800000e-01   1.3228000e+01   1.0300000e+00   3.4901000e+01   6.9100000e-01   9.5500000e-01   9.8500000e-01
   7.1480000e+00   2.1000000e+01   3.8980828e+04   2.6780780e+03   9.1349460e+03   3.3216100e+02   3.3216100e+02   8.4093900e+02   2.8800000e+02   6.9662400e+02   2.9610000e+00   9.9800000e-01   1.5524000e+01   1.0350000e+00   4.4887000e+01   8.8900000e-01   9.5500000e-01   9.8500000e-01
   8.2060000e+00   2.4000000e+01   5.0997285e+04   3.0876140e+03   9.3191330e+03   4.3804000e+02   4.3804000e+02   9.3835400e+02   2.8800000e+02   7.3850400e+02   3.5710000e+00   9.9800000e-01   1.8436000e+01   1.0410000e+00   6.1275000e+01   1.2130000e+00   9.5500000e-01   9.8500000e-01
   9.3000000e+00   2.7000000e+01   7.2770405e+04   3.5604160e+03   9.7804650e+03   6.4484300e+02   6.4484300e+02   1.1009650e+03   2.8800000e+02   7.8581400e+02   4.4920000e+00   9.9800000e-01   2.2570000e+01   1.0490000e+00   9.1100000e+01   1.8030000e+00   9.5500000e-01   9.8500000e-01
   1.1380000e+00   3.0000000e+00   5.1352820e+03   1.4106630e+03   6.7387500e+03   1.1188000e+01   1.1188000e+01   5.9749300e+02   2.8800000e+02   5.7258600e+02   1.2790000e+00   9.9800000e-01   6.9100000e+00   1.0190000e+00   0.0000000e+00   2.3500000e-01   9.5500000e-01   9.8600000e-01
   2.0880000e+00   6.0000000e+00   4.9475420e+03   1.3447760e+03   6.8255170e+03   2.2441000e+01   2.2441000e+01   5.7824600e+02   2.8800000e+02   5.7079400e+02   1.2630000e+00   9.9800000e-01   6.8320000e+00   1.0190000e+00   2.3503000e+01   2.3100000e-01   9.5500000e-01   9.8600000e-01
   3.1440000e+00   9.0000000e+00   8.3797340e+03   1.3867610e+03   7.1286480e+03   6.0357000e+01   6.0357000e+01   5.9462400e+02   2.8800000e+02   5.8483200e+02   1.3880000e+00   9.9800000e-01   7.4960000e+00   1.0200000e+00   1.2627000e+01   2.5000000e-01   9.5500000e-01   9.8600000e-01
   4.1610000e+00   1.2000000e+01   1.4724563e+04   1.5474690e+03   7.8031240e+03   1.1380300e+02   1.1380300e+02   6.4930800e+02   2.8800000e+02   6.1095200e+02   1.6560000e+00   9.9800000e-01   8.9120000e+00   1.0220000e+00   1.7547000e+01   3.4700000e-01   9.5500000e-01   9.8600000e-01
   5.1400000e+00   1.5000000e+01   2.1636727e+04   1.9243300e+03   8.4999300e+03   1.7528500e+02   1.7528500e+02   7.1793700e+02   2.8800000e+02   6.4236100e+02   2.0770000e+00   9.9800000e-01   1.1078000e+01   1.0260000e+00   2.5633000e+01   5.0700000e-01   9.5500000e-01   9.8600000e-01
   6.1750000e+00   1.8000000e+01   2.9794674e+04   2.3073180e+03   8.8342550e+03   2.4631800e+02   2.4631800e+02   7.8545700e+02   2.8800000e+02   6.7269300e+02   2.5000000e+00   9.9800000e-01   1.3214000e+01   1.0300000e+00   3.4829000e+01   6.9000000e-01   9.5500000e-01   9.8600000e-01
   7.1480000e+00   2.1000000e+01   3.8980452e+04   2.6780770e+03   9.1354530e+03   3.3219400e+02   3.3219400e+02   8.3991000e+02   2.8800000e+02   6.9645400e+02   2.9600000e+00   9.9800000e-01   1.5507000e+01   1.0350000e+00   4.4806000e+01   8.8700000e-01   9.5500000e-01   9.8600000e-01
   8.2060000e+00   2.4000000e+01   5.0997098e+04   3.0876150e+03   9.3194920e+03   4.3812900e+02   4.3812900e+02   9.3733200e+02   2.8800000e+02   7.3834300e+02   3.5700000e+00   9.9800000e-01   1.8414000e+01   1.0410000e+00   6.1179000e+01   1.2110000e+00   9.5500000e-01   9.8600000e-01
   9.3000000e+00   2.7000000e+01   7.2771577e+04   3.5604220e+03   9.7812390e+03   6.4507800e+02   6.4507800e+02   1.1000870e+03   2.8800000e+02   7.8567500e+02   4.4900000e+00   9.9800000e-01   2.2543000e+01   1.0490000e+00   9.0995000e+01   1.8010000e+00   9.5500000e-01   9.8600000e-01
   1.1380000e+00   3.0000000e+00   6.1913490e+03   1.3979700e+03   6.7338120e+03   1.0432000e+01   1.0432000e+01   6.2684800e+02   2.8800000e+02   5.7630500e+02   1.3090000e+00   9.9800000e-01   7.0800000e+00   1.0190000e+00   0.0000000e+00   2.7100000e-01   9.5500000e-01   9.8700000e-01
   2.0880000e+00   6.0000000e+00   4.7078060e+03   1.3443340e+03   6.8277760e+03   2.2356000e+01   2.2356000e+01   5.7106600e+02   2.8800000e+02   5.6974900e+02   1.2550000e+00   9.9800000e-01   6.7860000e+00   1.0190000e+00   2.3571000e+01   2.2300000e-01   9.5500000e-01   9.8700000e-01
   3.1440000e+00   9.0000000e+00   8.3798490e+03   1.3867610e+03   7.1312330e+03   6.0368000e+01   6.0368000e+01   5.9381400e+02   2.8800000e+02   5.8468300e+02   1.3880000e+00   9.9800000e-01   7.4880000e+00   1.0200000e+00   1.2593000e+01   2.4900000e-01   9.5500000e-01   9.8700000e-01
   4.1610000e+00   1.2000000e+01   1.4724594e+04   1.5474700e+03   7.8051400e+03   1.1380200e+02   1.1380200e+02   6.4843100e+02   2.8800000e+02   6.1079100e+02   1.6560000e+00   9.9800000e-01   8.9030000e+00   1.0220000e+00   1.7505000e+01   3.4700000e-01   9.5500000e-01   9.8700000e-01
   5.1400000e+00   1.5000000e+01   2.1637004e+04   1.9243310e+03   8.5008460e+03   1.7530800e+02   1.7530800e+02   7.1696800e+02   2.8800000e+02   6.4218000e+02   2.0770000e+00   9.9800000e-01   1.1067000e+01   1.0260000e+00   2.5577000e+01   5.0600000e-01   9.5500000e-01   9.8700000e-01
   6.1750000e+00   1.8000000e+01   2.9794963e+04   2.3073070e+03   8.8352870e+03   2.4625200e+02   2.4625200e+02   7.8436000e+02   2.8800000e+02   6.7247200e+02   2.4990000e+00   9.9800000e-01   1.3201000e+01   1.0300000e+00   3.4757000e+01   6.8800000e-01   9.5500000e-01   9.8700000e-01
   7.1480000e+00   2.1000000e+01   3.8980115e+04   2.6780760e+03   9.1359600e+03   3.3218500e+02   3.3218500e+02   8.3888400e+02   2.8800000e+02   6.9628500e+02   2.9590000e+00   9.9800000e-01   1.5490000e+01   1.0350000e+00   4.4726000e+01   8.8600000e-01   9.5500000e-01   9.8700000e-01
   8.2060000e+00   2.4000000e+01   5.0997029e+04   3.0876120e+03   9.3198500e+03   4.3798400e+02   4.3798400e+02   9.3631300e+02   2.8800000e+02   7.3818300e+02   3.5690000e+00   9.9800000e-01   1.8393000e+01   1.0410000e+00   6.1084000e+01   1.2090000e+00   9.5500000e-01   9.8700000e-01
   9.3000000e+00   2.7000000e+01   7.2772059e+04   3.5604260e+03   9.7819970e+03   6.4505300e+02   6.4505300e+02   1.0992070e+03   2.8800000e+02   7.8553700e+02   4.4890000e+00   9.9800000e-01   2.2516000e+01   1.0490000e+00   9.0891000e+01   1.7990000e+00   9.5500000e-01   9.8700000e-01
   1.1380000e+00   3.0000000e+00   6.8733310e+03   1.3860570e+03   6.7291880e+03   9.7210000e+00   9.7210000e+00   6.4633600e+02   2.8800000e+02   5.7823900e+02   1.3250000e+00   9.9800000e-01   7.1710000e+00   1.0190000e+00   0.0000000e+00   2.9600000e-01   9.5500000e-01   9.8800000e-01
   2.0880000e+00   6.0000000e+00   4.7182980e+03   1.3444980e+03   6.8304200e+03   2.2388000e+01   2.2388000e+01   5.7051100e+02   2.8800000e+02   5.6965400e+02   1.2550000e+00   9.9800000e-01   6.7820000e+00   1.0190000e+00   2.3462000e+01   2.2200000e-01   9.5500000e-01   9.8800000e-01
   3.1440000e+00   9.0000000e+00   8.3799280e+03   1.3867620e+03   7.1338170e+03   6.0361000e+01   6.0361000e+01   5.9300400e+02   2.8800000e+02   5.8453500e+02   1.3880000e+00   9.9800000e-01   7.4810000e+00   1.0200000e+00   1.2560000e+01   2.4900000e-01   9.5500000e-01   9.8800000e-01
   4.1610000e+00   1.2000000e+01   1.4724647e+04   1.5474700e+03   7.8071580e+03   1.1380300e+02   1.1380300e+02   6.4755500e+02   2.8800000e+02   6.1063100e+02   1.6560000e+00   9.9800000e-01   8.8940000e+00   1.0220000e+00   1.7463000e+01   3.4600000e-01   9.5500000e-01   9.8800000e-01
   5.1400000e+00   1.5000000e+01   2.1637076e+04   1.9243340e+03   8.5017560e+03   1.7531100e+02   1.7531100e+02   7.1600000e+02   2.8800000e+02   6.4200000e+02   2.0760000e+00   9.9800000e-01   1.1056000e+01   1.0260000e+00   2.5521000e+01   5.0500000e-01   9.5500000e-01   9.8800000e-01
   6.1750000e+00   1.8000000e+01   2.9795352e+04   2.3073010e+03   8.8363240e+03   2.4631400e+02   2.4631400e+02   7.8326600e+02   2.8800000e+02   6.7225300e+02   2.4990000e+00   9.9800000e-01   1.3187000e+01   1.0300000e+00   3.4686000e+01   6.8700000e-01   9.5500000e-01   9.8800000e-01
   7.1480000e+00   2.1000000e+01   3.8979746e+04   2.6780760e+03   9.1364660e+03   3.3215600e+02   3.3215600e+02   8.3786100e+02   2.8800000e+02   6.9611600e+02   2.9590000e+00   9.9800000e-01   1.5473000e+01   1.0350000e+00   4.4645000e+01   8.8400000e-01   9.5500000e-01   9.8800000e-01
   8.2060000e+00   2.4000000e+01   5.0996943e+04   3.0876080e+03   9.3202080e+03   4.3813500e+02   4.3813500e+02   9.3529700e+02   2.8800000e+02   7.3802300e+02   3.5680000e+00   9.9800000e-01   1.8372000e+01   1.0410000e+00   6.0988000e+01   1.2070000e+00   9.5500000e-01   9.8800000e-01
   9.3000000e+00   2.7000000e+01   7.2773227e+04   3.5604210e+03   9.7827590e+03   6.4504200e+02   6.4504200e+02   1.0983330e+03   2.8800000e+02   7.8540100e+02   4.4880000e+00   9.9800000e-01   2.2490000e+01   1.0490000e+00   9.0787000e+01   1.7970000e+00   9.5500000e-01   9.8800000e-01
   1.1380000e+00   3.0000000e+00   7.3886300e+03   1.3543270e+03   6.7119970e+03   7.8860000e+00   7.8860000e+00   6.6829000e+02   2.8800000e+02   5.7914300e+02   1.3300000e+00   9.9800000e-01   7.2140000e+00   1.0190000e+00   1.5978000e+01   3.3300000e-01   9.5500000e-01   9.8900000e-01
   2.0880000e+00   6.0000000e+00   4.5689050e+03   1.3443780e+03   6.8328690e+03   2.2359000e+01   2.2359000e+01   5.6551800e+02   2.8800000e+02   5.6884400e+02   1.2510000e+00   9.9800000e-01   6.7460000e+00   1.0190000e+00   2.3385000e+01   2.1700000e-01   9.5500000e-01   9.8900000e-01
   3.1440000e+00   9.0000000e+00   8.3800230e+03   1.3867620e+03   7.1364030e+03   6.0364000e+01   6.0364000e+01   5.9219700e+02   2.8800000e+02   5.8438700e+02   1.3880000e+00   9.9800000e-01   7.4740000e+00   1.0200000e+00   1.2526000e+01   2.4800000e-01   9.5500000e-01   9.8900000e-01
   4.1610000e+00   1.2000000e+01   1.4724782e+04   1.5474710e+03   7.8091860e+03   1.1380200e+02   1.1380200e+02   6.4668200e+02   2.8800000e+02   6.1047100e+02   1.6560000e+00   9.9800000e-01   8.8850000e+00   1.0220000e+00   1.7421000e+01   3.4500000e-01   9.5500000e-01   9.8900000e-01
   5.1400000e+00   1.5000000e+01   2.1637248e+04   1.9243360e+03   8.5026700e+03   1.7531300e+02   1.7531300e+02   7.1503500e+02   2.8800000e+02   6.4182000e+02   2.0760000e+00   9.9800000e-01   1.1045000e+01   1.0260000e+00   2.5466000e+01   5.0400000e-01   9.5500000e-01   9.8900000e-01
   6.1750000e+00   1.8000000e+01   2.9795675e+04   2.3072940e+03   8.8373580e+03   2.4628000e+02   2.4628000e+02   7.8217600e+02   2.8800000e+02   6.7203400e+02   2.4980000e+00   9.9800000e-01   1.3173000e+01   1.0300000e+00   3.4614000e+01   6.8500000e-01   9.5500000e-01   9.8900000e-01
   7.1480000e+00   2.1000000e+01   3.8979346e+04   2.6780760e+03   9.1369720e+03   3.3209700e+02   3.3209700e+02   8.3684100e+02   2.8800000e+02   6.9594700e+02   2.9580000e+00   9.9800000e-01   1.5456000e+01   1.0350000e+00   4.4565000e+01   8.8200000e-01   9.5500000e-01   9.8900000e-01
   8.2060000e+00   2.4000000e+01   5.0996804e+04   3.0876080e+03   9.3205650e+03   4.3798000e+02   4.3798000e+02   9.3428400e+02   2.8800000e+02   7.3786300e+02   3.5670000e+00   9.9800000e-01   1.8351000e+01   1.0410000e+00   6.0893000e+01   1.2050000e+00   9.5500000e-01   9.8900000e-01
   9.3000000e+00   2.7000000e+01   7.2772874e+04   3.5604340e+03   9.7835000e+03   6.4511900e+02   6.4511900e+02   1.0974530e+03   2.8800000e+02   7.8526300e+02   4.4870000e+00   9.9800000e-01   2.2463000e+01   1.0490000e+00   9.0682000e+01   1.7950000e+00   9.5500000e-01   9.8900000e-01
   1.1380000e+00   3.0000000e+00   6.8020330e+03   1.3353210e+03   6.7021950e+03   6.8150000e+00   6.8150000e+00   6.5686500e+02   2.8800000e+02   5.7663200e+02   1.3090000e+00   9.9800000e-01   7.0950000e+00   1.0190000e+00   2.4726000e+01   3.2400000e-01   9.5500000e-01   9.9000000e-01
   2.0880000e+00   6.0000000e+00   4.5020960e+03   1.3444210e+03   6.8354390e+03   2.2375000e+01   2.2375000e+01   5.6292400e+02   2.8800000e+02   5.6845700e+02   1.2480000e+00   9.9800000e-01   6.7290000e+00   1.0190000e+00   2.3299000e+01   2.1400000e-01   9.5500000e-01   9.9000000e-01
   3.1440000e+00   9.0000000e+00   8.3801270e+03   1.3867630e+03   7.1389900e+03   6.0360000e+01   6.0360000e+01   5.9139100e+02   2.8800000e+02   5.8423900e+02   1.3880000e+00   9.9800000e-01   7.4670000e+00   1.0200000e+00   1.2492000e+01   2.4700000e-01   9.5500000e-01   9.9000000e-01
   4.1610000e+00   1.2000000e+01   1.4724795e+04   1.5474720e+03   7.8112050e+03   1.1379600e+02   1.1379600e+02   6.4581100e+02   2.8800000e+02   6.1031200e+02   1.6550000e+00   9.9800000e-01   8.8760000e+00   1.0220000e+00   1.7379000e+01   3.4400000e-01   9.5500000e-01   9.9000000e-01
   5.1400000e+00   1.5000000e+01   2.1637563e+04   1.9243370e+03   8.5035880e+03   1.7532700e+02   1.7532700e+02   7.1407400e+02   2.8800000e+02   6.4164100e+02   2.0760000e+00   9.9800000e-01   1.1033000e+01   1.0260000e+00   2.5411000e+01   5.0300000e-01   9.5500000e-01   9.9000000e-01
   6.1750000e+00   1.8000000e+01   2.9795971e+04   2.3072820e+03   8.8383890e+03   2.4627800e+02   2.4627800e+02   7.8108900e+02   2.8800000e+02   6.7181600e+02   2.4980000e+00   9.9800000e-01   1.3160000e+01   1.0300000e+00   3.4543000e+01   6.8400000e-01   9.5500000e-01   9.9000000e-01
   7.1480000e+00   2.1000000e+01   3.8979048e+04   2.6780770e+03   9.1374790e+03   3.3217600e+02   3.3217600e+02   8.3582400e+02   2.8800000e+02   6.9578000e+02   2.9580000e+00   9.9800000e-01   1.5439000e+01   1.0350000e+00   4.4485000e+01   8.8100000e-01   9.5500000e-01   9.9000000e-01
   8.2060000e+00   2.4000000e+01   5.0996501e+04   3.0876010e+03   9.3209290e+03   4.3812200e+02   4.3812200e+02   9.3326500e+02   2.8800000e+02   7.3770500e+02   3.5670000e+00   9.9800000e-01   1.8330000e+01   1.0410000e+00   6.0797000e+01   1.2040000e+00   9.5500000e-01   9.9000000e-01
   9.3000000e+00   2.7000000e+01   7.2774071e+04   3.5604320e+03   9.7842560e+03   6.4508800e+02   6.4508800e+02   1.0965850e+03   2.8800000e+02   7.8512800e+02   4.4860000e+00   9.9800000e-01   2.2436000e+01   1.0490000e+00   9.0579000e+01   1.7930000e+00   9.5500000e-01   9.9000000e-01
   1.1380000e+00   3.0000000e+00   5.1151490e+03   1.3152990e+03   6.6907520e+03   5.7110000e+00   5.7110000e+00   6.1676000e+02   2.8800000e+02   5.7014100e+02   1.2560000e+00   9.9800000e-01   6.7980000e+00   1.0190000e+00   3.2328000e+01   2.8100000e-01   9.5500000e-01   9.9100000e-01
   2.0880000e+00   6.0000000e+00   4.2435460e+03   1.3446930e+03   6.8381230e+03   2.2409000e+01   2.2409000e+01   5.5484000e+02   2.8800000e+02   5.6728400e+02   1.2400000e+00   9.9800000e-01   6.6780000e+00   1.0190000e+00   2.2687000e+01   2.0400000e-01   9.5500000e-01   9.9100000e-01
   3.1440000e+00   9.0000000e+00   8.3802730e+03   1.3867630e+03   7.1415800e+03   6.0374000e+01   6.0374000e+01   5.9058800e+02   2.8800000e+02   5.8409100e+02   1.3880000e+00   9.9800000e-01   7.4600000e+00   1.0200000e+00   1.2459000e+01   2.4700000e-01   9.5500000e-01   9.9100000e-01
   4.1610000e+00   1.2000000e+01   1.4724893e+04   1.5474720e+03   7.8132330e+03   1.1380600e+02   1.1380600e+02   6.4494200e+02   2.8800000e+02   6.1015200e+02   1.6550000e+00   9.9800000e-01   8.8670000e+00   1.0220000e+00   1.7337000e+01   3.4300000e-01   9.5500000e-01   9.9100000e-01
   5.1400000e+00   1.5000000e+01   2.1637633e+04   1.9243390e+03   8.5044990e+03   1.7529900e+02   1.7529900e+02   7.1311300e+02   2.8800000e+02   6.4146100e+02   2.0760000e+00   9.9800000e-01   1.1022000e+01   1.0260000e+00   2.5355000e+01   5.0200000e-01   9.5500000e-01   9.9100000e-01
   6.1750000e+00   1.8000000e+01   2.9796205e+04   2.3072710e+03   8.8394160e+03   2.4628300e+02   2.4628300e+02   7.8000500e+02   2.8800000e+02   6.7159800e+02   2.4980000e+00   9.9800000e-01   1.3146000e+01   1.0300000e+00   3.4472000e+01   6.8300000e-01   9.5500000e-01   9.9100000e-01
   7.1480000e+00   2.1000000e+01   3.8978769e+04   2.6780770e+03   9.1379850e+03   3.3204600e+02   3.3204600e+02   8.3480900e+02   2.8800000e+02   6.9561200e+02   2.9570000e+00   9.9800000e-01   1.5422000e+01   1.0350000e+00   4.4405000e+01   8.7900000e-01   9.5500000e-01   9.9100000e-01
   8.2060000e+00   2.4000000e+01   5.0995658e+04   3.0875820e+03   9.3213120e+03   4.3801300e+02   4.3801300e+02   9.3223000e+02   2.8800000e+02   7.3754800e+02   3.5660000e+00   9.9800000e-01   1.8309000e+01   1.0410000e+00   6.0700000e+01   1.2020000e+00   9.5500000e-01   9.9100000e-01
   9.3000000e+00   2.7000000e+01   7.2775355e+04   3.5604280e+03   9.7850080e+03   6.4503600e+02   6.4503600e+02   1.0957180e+03   2.8800000e+02   7.8499400e+02   4.4840000e+00   9.9800000e-01   2.2409000e+01   1.0490000e+00   9.0476000e+01   1.7910000e+00   9.5500000e-01   9.9100000e-01
   1.1380000e+00   3.0000000e+00   4.5965950e+03   1.3120350e+03   6.6908050e+03   5.5300000e+00   5.5300000e+00   6.0263400e+02   2.8800000e+02   5.6793000e+02   1.2400000e+00   9.9800000e-01   6.7000000e+00   1.0190000e+00   3.2965000e+01   2.6500000e-01   9.5500000e-01   9.9200000e-01
   2.0880000e+00   6.0000000e+00   3.9778880e+03   1.3452310e+03   6.8409300e+03   2.2497000e+01   2.2497000e+01   5.4630200e+02   2.8800000e+02   5.6599600e+02   1.2320000e+00   9.9800000e-01   6.6230000e+00   1.0190000e+00   2.2039000e+01   1.9300000e-01   9.5500000e-01   9.9200000e-01
   3.1440000e+00   9.0000000e+00   8.3803200e+03   1.3867640e+03   7.1441650e+03   6.0374000e+01   6.0374000e+01   5.8978500e+02   2.8800000e+02   5.8394300e+02   1.3870000e+00   9.9800000e-01   7.4520000e+00   1.0200000e+00   1.2426000e+01   2.4600000e-01   9.5500000e-01   9.9200000e-01
   4.1610000e+00   1.2000000e+01   1.4725061e+04   1.5474730e+03   7.8152680e+03   1.1380900e+02   1.1380900e+02   6.4407600e+02   2.8800000e+02   6.0999400e+02   1.6550000e+00   9.9800000e-01   8.8590000e+00   1.0220000e+00   1.7296000e+01   3.4200000e-01   9.5500000e-01   9.9200000e-01
   5.1400000e+00   1.5000000e+01   2.1637730e+04   1.9243410e+03   8.5054110e+03   1.7529300e+02   1.7529300e+02   7.1215500e+02   2.8800000e+02   6.4128200e+02   2.0750000e+00   9.9800000e-01   1.1011000e+01   1.0260000e+00   2.5300000e+01   5.0100000e-01   9.5500000e-01   9.9200000e-01
   6.1750000e+00   1.8000000e+01   2.9796529e+04   2.3072640e+03   8.8404490e+03   2.4631800e+02   2.4631800e+02   7.7892500e+02   2.8800000e+02   6.7138000e+02   2.4970000e+00   9.9800000e-01   1.3133000e+01   1.0300000e+00   3.4401000e+01   6.8100000e-01   9.5500000e-01   9.9200000e-01
   7.1480000e+00   2.1000000e+01   3.8978435e+04   2.6780770e+03   9.1384910e+03   3.3217300e+02   3.3217300e+02   8.3379800e+02   2.8800000e+02   6.9544500e+02   2.9560000e+00   9.9800000e-01   1.5406000e+01   1.0350000e+00   4.4325000e+01   8.7800000e-01   9.5500000e-01   9.9200000e-01
   8.2060000e+00   2.4000000e+01   5.0995214e+04   3.0875670e+03   9.3217100e+03   4.3810300e+02   4.3810300e+02   9.3120200e+02   2.8800000e+02   7.3739400e+02   3.5650000e+00   9.9800000e-01   1.8289000e+01   1.0410000e+00   6.0604000e+01   1.2000000e+00   9.5500000e-01   9.9200000e-01
   9.3000000e+00   2.7000000e+01   7.2776326e+04   3.5604310e+03   9.7857540e+03   6.4507800e+02   6.4507800e+02   1.0948530e+03   2.8800000e+02   7.8486000e+02   4.4830000e+00   9.9800000e-01   2.2382000e+01   1.0490000e+00   9.0373000e+01   1.7890000e+00   9.5500000e-01   9.9200000e-01
   1.1380000e+00   3.0000000e+00   2.8064660e+03   1.3082000e+03   6.6889310e+03   5.3130000e+00   5.3130000e+00   5.5239000e+02   2.8800000e+02   5.6031300e+02   1.1830000e+00   9.9800000e-01   6.3760000e+00   1.0190000e+00   3.2191000e+01   2.0700000e-01   9.5500000e-01   9.9300000e-01
   2.0880000e+00   6.0000000e+00   3.7545440e+03   1.3461900e+03   6.8440610e+03   2.2668000e+01   2.2668000e+01   5.3871500e+02   2.8800000e+02   5.6485100e+02   1.2250000e+00   9.9800000e-01   6.5740000e+00   1.0190000e+00   2.1283000e+01   1.8400000e-01   9.5500000e-01   9.9300000e-01
   3.1440000e+00   9.0000000e+00   8.3804420e+03   1.3867650e+03   7.1467550e+03   6.0363000e+01   6.0363000e+01   5.8898400e+02   2.8800000e+02   5.8379500e+02   1.3870000e+00   9.9800000e-01   7.4450000e+00   1.0200000e+00   1.2392000e+01   2.4500000e-01   9.5500000e-01   9.9300000e-01
   4.1610000e+00   1.2000000e+01   1.4725086e+04   1.5474740e+03   7.8172930e+03   1.1380700e+02   1.1380700e+02   6.4321100e+02   2.8800000e+02   6.0983500e+02   1.6550000e+00   9.9800000e-01   8.8500000e+00   1.0220000e+00   1.7254000e+01   3.4200000e-01   9.5500000e-01   9.9300000e-01
   5.1400000e+00   1.5000000e+01   2.1637947e+04   1.9243430e+03   8.5063270e+03   1.7530100e+02   1.7530100e+02   7.1120000e+02   2.8800000e+02   6.4110400e+02   2.0750000e+00   9.9800000e-01   1.1000000e+01   1.0260000e+00   2.5245000e+01   5.0000000e-01   9.5500000e-01   9.9300000e-01
   6.1750000e+00   1.8000000e+01   2.9796700e+04   2.3072530e+03   8.8414730e+03   2.4627500e+02   2.4627500e+02   7.7784800e+02   2.8800000e+02   6.7116400e+02   2.4970000e+00   9.9800000e-01   1.3119000e+01   1.0300000e+00   3.4330000e+01   6.8000000e-01   9.5500000e-01   9.9300000e-01
   7.1480000e+00   2.1000000e+01   3.8978116e+04   2.6780770e+03   9.1389960e+03   3.3203600e+02   3.3203600e+02   8.3278800e+02   2.8800000e+02   6.9527900e+02   2.9560000e+00   9.9800000e-01   1.5389000e+01   1.0350000e+00   4.4246000e+01   8.7600000e-01   9.5500000e-01   9.9300000e-01
   8.2060000e+00   2.4000000e+01   5.0994999e+04   3.0875600e+03   9.3221120e+03   4.3808000e+02   4.3808000e+02   9.3017800e+02   2.8800000e+02   7.3724100e+02   3.5640000e+00   9.9800000e-01   1.8268000e+01   1.0410000e+00   6.0509000e+01   1.1980000e+00   9.5500000e-01   9.9300000e-01
   9.3000000e+00   2.7000000e+01   7.2776831e+04   3.5604350e+03   9.7864900e+03   6.4485100e+02   6.4485100e+02   1.0939880e+03   2.8800000e+02   7.8472700e+02   4.4820000e+00   9.9800000e-01   2.2356000e+01   1.0490000e+00   9.0270000e+01   1.7870000e+00   9.5500000e-01   9.9300000e-01
   1.1380000e+00   3.0000000e+00   1.5200120e+03   1.3127050e+03   6.6926410e+03   5.5390000e+00   5.5390000e+00   5.1007500e+02   2.8800000e+02   5.5377700e+02   1.1390000e+00   9.9800000e-01   6.1120000e+00   1.0190000e+00   2.7918000e+01   1.5600000e-01   9.5500000e-01   9.9400000e-01
   2.0880000e+00   6.0000000e+00   3.7822740e+03   1.3461060e+03   6.8465740e+03   2.2648000e+01   2.2648000e+01   5.3882800e+02   2.8800000e+02   5.6480400e+02   1.2250000e+00   9.9800000e-01   6.5720000e+00   1.0190000e+00   2.1341000e+01   1.8500000e-01   9.5500000e-01   9.9400000e-01
   3.1440000e+00   9.0000000e+00   8.3806270e+03   1.3867650e+03   7.1493500e+03   6.0371000e+01   6.0371000e+01   5.8818600e+02   2.8800000e+02   5.8364800e+02   1.3870000e+00   9.9800000e-01   7.4380000e+00   1.0200000e+00   1.2359000e+01   2.4500000e-01   9.5500000e-01   9.9400000e-01
   4.1610000e+00   1.2000000e+01   1.4725190e+04   1.5474740e+03   7.8193260e+03   1.1380900e+02   1.1380900e+02   6.4234900e+02   2.8800000e+02   6.0967700e+02   1.6550000e+00   9.9800000e-01   8.8410000e+00   1.0220000e+00   1.7212000e+01   3.4100000e-01   9.5500000e-01   9.9400000e-01
   5.1400000e+00   1.5000000e+01   2.1638123e+04   1.9243440e+03   8.5072420e+03   1.7530300e+02   1.7530300e+02   7.1024700e+02   2.8800000e+02   6.4092600e+02   2.0750000e+00   9.9800000e-01   1.0989000e+01   1.0260000e+00   2.5190000e+01   4.9900000e-01   9.5500000e-01   9.9400000e-01
   6.1750000e+00   1.8000000e+01   2.9797056e+04   2.3072490e+03   8.8425080e+03   2.4628100e+02   2.4628100e+02   7.7677400e+02   2.8800000e+02   6.7094800e+02   2.4970000e+00   9.9800000e-01   1.3106000e+01   1.0300000e+00   3.4259000e+01   6.7800000e-01   9.5500000e-01   9.9400000e-01
   7.1480000e+00   2.1000000e+01   3.8977783e+04   2.6780770e+03   9.1395000e+03   3.3214500e+02   3.3214500e+02   8.3178200e+02   2.8800000e+02   6.9511300e+02   2.9550000e+00   9.9800000e-01   1.5372000e+01   1.0350000e+00   4.4167000e+01   8.7400000e-01   9.5500000e-01   9.9400000e-01
   8.2060000e+00   2.4000000e+01   5.0994846e+04   3.0875560e+03   9.3225140e+03   4.3800500e+02   4.3800500e+02   9.2915800e+02   2.8800000e+02   7.3708900e+02   3.5630000e+00   9.9800000e-01   1.8248000e+01   1.0410000e+00   6.0414000e+01   1.1960000e+00   9.5500000e-01   9.9400000e-01
   9.3000000e+00   2.7000000e+01   7.2778185e+04   3.5604280e+03   9.7872310e+03   6.4513300e+02   6.4513300e+02   1.0931290e+03   2.8800000e+02   7.8459500e+02   4.4810000e+00   9.9800000e-01   2.2329000e+01   1.0490000e+00   9.0168000e+01   1.7850000e+00   9.5500000e-01   9.9400000e-01
   1.1380000e+00   3.0000000e+00   4.5637800e+02   1.3283200e+03   6.7036240e+03   6.3740000e+00   6.3740000e+00   4.6602300e+02   2.8800000e+02   5.4781100e+02   1.1000000e+00   9.9800000e-01   5.8820000e+00   1.0190000e+00   1.7034000e+01   9.8000000e-02   9.5500000e-01   9.9500000e-01
   2.0880000e+00   6.0000000e+00   3.5762140e+03   1.3474320e+03   6.8499150e+03   2.2876000e+01   2.2876000e+01   5.3143700e+02   2.8800000e+02   5.6381400e+02   1.2190000e+00   9.9800000e-01   6.5300000e+00   1.0190000e+00   2.0180000e+01   1.7500000e-01   9.5500000e-01   9.9500000e-01
   3.1440000e+00   9.0000000e+00   8.3806280e+03   1.3867660e+03   7.1519340e+03   6.0370000e+01   6.0370000e+01   5.8738800e+02   2.8800000e+02   5.8350000e+02   1.3870000e+00   9.9800000e-01   7.4310000e+00   1.0200000e+00   1.2326000e+01   2.4400000e-01   9.5500000e-01   9.9500000e-01
   4.1610000e+00   1.2000000e+01   1.4725282e+04   1.5474750e+03   7.8213600e+03   1.1381100e+02   1.1381100e+02   6.4148800e+02   2.8800000e+02   6.0951800e+02   1.6540000e+00   9.9800000e-01   8.8320000e+00   1.0220000e+00   1.7171000e+01   3.4000000e-01   9.5500000e-01   9.9500000e-01
   5.1400000e+00   1.5000000e+01   2.1638271e+04   1.9243460e+03   8.5081570e+03   1.7535200e+02   1.7535200e+02   7.0929600e+02   2.8800000e+02   6.4074800e+02   2.0740000e+00   9.9800000e-01   1.0977000e+01   1.0260000e+00   2.5136000e+01   4.9800000e-01   9.5500000e-01   9.9500000e-01
   6.1750000e+00   1.8000000e+01   2.9797268e+04   2.3072400e+03   8.8435350e+03   2.4633700e+02   2.4633700e+02   7.7570300e+02   2.8800000e+02   6.7073200e+02   2.4960000e+00   9.9800000e-01   1.3093000e+01   1.0300000e+00   3.4189000e+01   6.7700000e-01   9.5500000e-01   9.9500000e-01
   7.1480000e+00   2.1000000e+01   3.8977474e+04   2.6780790e+03   9.1400050e+03   3.3216200e+02   3.3216200e+02   8.3077800e+02   2.8800000e+02   6.9494700e+02   2.9550000e+00   9.9800000e-01   1.5356000e+01   1.0350000e+00   4.4087000e+01   8.7300000e-01   9.5500000e-01   9.9500000e-01
   8.2060000e+00   2.4000000e+01   5.0994763e+04   3.0875510e+03   9.3229160e+03   4.3804100e+02   4.3804100e+02   9.2814100e+02   2.8800000e+02   7.3693700e+02   3.5620000e+00   9.9800000e-01   1.8228000e+01   1.0410000e+00   6.0319000e+01   1.1940000e+00   9.5500000e-01   9.9500000e-01
   9.3000000e+00   2.7000000e+01   7.2778558e+04   3.5604320e+03   9.7879570e+03   6.4480900e+02   6.4480900e+02   1.0922670e+03   2.8800000e+02   7.8446300e+02   4.4790000e+00   9.9800000e-01   2.2303000e+01   1.0490000e+00   9.0065000e+01   1.7830000e+00   9.5500000e-01   9.9500000e-01
   1.1380000e+00   3.0000000e+00   2.7669900e+02   1.3433080e+03   6.7154670e+03   7.1910000e+00   7.1910000e+00   4.5060000e+02   2.8800000e+02   5.4643000e+02   1.0940000e+00   9.9800000e-01   5.8310000e+00   1.0190000e+00   8.4260000e+00   7.4000000e-02   9.5500000e-01   9.9600000e-01
   2.0880000e+00   6.0000000e+00   3.6355580e+03   1.3471890e+03   6.8523380e+03   2.2840000e+01   2.2840000e+01   5.3262300e+02   2.8800000e+02   5.6392900e+02   1.2210000e+00   9.9800000e-01   6.5350000e+00   1.0190000e+00   2.0332000e+01   1.7700000e-01   9.5500000e-01   9.9600000e-01
   3.1440000e+00   9.0000000e+00   8.3807460e+03   1.3867660e+03   7.1545260e+03   6.0372000e+01   6.0372000e+01   5.8659200e+02   2.8800000e+02   5.8335300e+02   1.3870000e+00   9.9800000e-01   7.4240000e+00   1.0200000e+00   1.2292000e+01   2.4300000e-01   9.5500000e-01   9.9600000e-01
   4.1610000e+00   1.2000000e+01   1.4725349e+04   1.5474750e+03   7.8233930e+03   1.1380700e+02   1.1380700e+02   6.4063000e+02   2.8800000e+02   6.0936100e+02   1.6540000e+00   9.9800000e-01   8.8230000e+00   1.0220000e+00   1.7129000e+01   3.3900000e-01   9.5500000e-01   9.9600000e-01
   5.1400000e+00   1.5000000e+01   2.1638313e+04   1.9243490e+03   8.5090680e+03   1.7531700e+02   1.7531700e+02   7.0834800e+02   2.8800000e+02   6.4057000e+02   2.0740000e+00   9.9800000e-01   1.0966000e+01   1.0260000e+00   2.5081000e+01   4.9600000e-01   9.5500000e-01   9.9600000e-01
   6.1750000e+00   1.8000000e+01   2.9797502e+04   2.3072350e+03   8.8445640e+03   2.4628600e+02   2.4628600e+02   7.7463600e+02   2.8800000e+02   6.7051700e+02   2.4960000e+00   9.9800000e-01   1.3079000e+01   1.0300000e+00   3.4119000e+01   6.7600000e-01   9.5500000e-01   9.9600000e-01
   7.1480000e+00   2.1000000e+01   3.8977218e+04   2.6780780e+03   9.1405100e+03   3.3215800e+02   3.3215800e+02   8.2977700e+02   2.8800000e+02   6.9478200e+02   2.9540000e+00   9.9800000e-01   1.5339000e+01   1.0350000e+00   4.4008000e+01   8.7100000e-01   9.5500000e-01   9.9600000e-01
   8.2060000e+00   2.4000000e+01   5.0994680e+04   3.0875480e+03   9.3233180e+03   4.3810800e+02   4.3810800e+02   9.2712800e+02   2.8800000e+02   7.3678600e+02   3.5620000e+00   9.9800000e-01   1.8207000e+01   1.0410000e+00   6.0224000e+01   1.1920000e+00   9.5500000e-01   9.9600000e-01
   9.3000000e+00   2.7000000e+01   7.2779640e+04   3.5604320e+03   9.7886890e+03   6.4504600e+02   6.4504600e+02   1.0914120e+03   2.8800000e+02   7.8433200e+02   4.4780000e+00   9.9800000e-01   2.2276000e+01   1.0490000e+00   8.9963000e+01   1.7810000e+00   9.5500000e-01   9.9600000e-01
   1.1380000e+00   3.0000000e+00   4.2489400e+02   1.3544170e+03   6.7253780e+03   7.8060000e+00   7.8060000e+00   4.5060600e+02   2.8800000e+02   5.4719600e+02   1.1010000e+00   9.9800000e-01   5.8610000e+00   1.0190000e+00   2.2050000e+00   7.0000000e-02   9.5500000e-01   9.9700000e-01
   2.0880000e+00   6.0000000e+00   3.4029740e+03   1.3489090e+03   6.8559250e+03   2.3136000e+01   2.3136000e+01   5.2449600e+02   2.8800000e+02   5.6278800e+02   1.2130000e+00   9.9800000e-01   6.4870000e+00   1.0190000e+00   1.8944000e+01   1.6700000e-01   9.5500000e-01   9.9700000e-01
   3.1440000e+00   9.0000000e+00   8.3808780e+03   1.3867670e+03   7.1571200e+03   6.0382000e+01   6.0382000e+01   5.8579900e+02   2.8800000e+02   5.8320600e+02   1.3870000e+00   9.9800000e-01   7.4170000e+00   1.0200000e+00   1.2259000e+01   2.4300000e-01   9.5500000e-01   9.9700000e-01
   4.1610000e+00   1.2000000e+01   1.4725513e+04   1.5474760e+03   7.8254370e+03   1.1380900e+02   1.1380900e+02   6.3977500e+02   2.8800000e+02   6.0920300e+02   1.6540000e+00   9.9800000e-01   8.8140000e+00   1.0220000e+00   1.7088000e+01   3.3800000e-01   9.5500000e-01   9.9700000e-01
   5.1400000e+00   1.5000000e+01   2.1638585e+04   1.9243500e+03   8.5099870e+03   1.7533400e+02   1.7533400e+02   7.0740300e+02   2.8800000e+02   6.4039400e+02   2.0740000e+00   9.9800000e-01   1.0955000e+01   1.0260000e+00   2.5026000e+01   4.9500000e-01   9.5500000e-01   9.9700000e-01
   6.1750000e+00   1.8000000e+01   2.9797713e+04   2.3072290e+03   8.8455920e+03   2.4632600e+02   2.4632600e+02   7.7357100e+02   2.8800000e+02   6.7030300e+02   2.4960000e+00   9.9800000e-01   1.3066000e+01   1.0300000e+00   3.4049000e+01   6.7400000e-01   9.5500000e-01   9.9700000e-01
   7.1480000e+00   2.1000000e+01   3.8976899e+04   2.6780800e+03   9.1410130e+03   3.3204800e+02   3.3204800e+02   8.2877900e+02   2.8800000e+02   6.9461700e+02   2.9540000e+00   9.9800000e-01   1.5322000e+01   1.0350000e+00   4.3930000e+01   8.7000000e-01   9.5500000e-01   9.9700000e-01
   8.2060000e+00   2.4000000e+01   5.0994595e+04   3.0875460e+03   9.3237190e+03   4.3806700e+02   4.3806700e+02   9.2611700e+02   2.8800000e+02   7.3663600e+02   3.5610000e+00   9.9800000e-01   1.8187000e+01   1.0410000e+00   6.0130000e+01   1.1900000e+00   9.5500000e-01   9.9700000e-01
   9.3000000e+00   2.7000000e+01   7.2779442e+04   3.5604360e+03   9.7893990e+03   6.4496600e+02   6.4496600e+02   1.0905510e+03   2.8800000e+02   7.8420100e+02   4.4770000e+00   9.9800000e-01   2.2250000e+01   1.0490000e+00   8.9860000e+01   1.7790000e+00   9.5500000e-01   9.9700000e-01
   1.1380000e+00   3.0000000e+00   6.8513400e+02   1.3666770e+03   6.7362680e+03   8.5060000e+00   8.5060000e+00   4.5703100e+02   2.8800000e+02   5.4870400e+02   1.1130000e+00   9.9800000e-01   5.9180000e+00   1.0190000e+00   0.0000000e+00   7.6000000e-02   9.5500000e-01   9.9800000e-01
   2.0880000e+00   6.0000000e+00   3.1918860e+03   1.3514800e+03   6.8600240e+03   2.3595000e+01   2.3595000e+01   5.1655000e+02   2.8800000e+02   5.6174000e+02   1.2070000e+00   9.9800000e-01   6.4440000e+00   1.0190000e+00   1.6981000e+01   1.5600000e-01   9.5500000e-01   9.9800000e-01
   3.1440000e+00   9.0000000e+00   8.3809570e+03   1.3867680e+03   7.1597100e+03   6.0377000e+01   6.0377000e+01   5.8500600e+02   2.8800000e+02   5.8305800e+02   1.3870000e+00   9.9800000e-01   7.4100000e+00   1.0200000e+00   1.2226000e+01   2.4200000e-01   9.5500000e-01   9.9800000e-01
   4.1610000e+00   1.2000000e+01   1.4725504e+04   1.5474770e+03   7.8274680e+03   1.1381000e+02   1.1381000e+02   6.3892000e+02   2.8800000e+02   6.0904600e+02   1.6540000e+00   9.9800000e-01   8.8060000e+00   1.0220000e+00   1.7047000e+01   3.3700000e-01   9.5500000e-01   9.9800000e-01
   5.1400000e+00   1.5000000e+01   2.1638807e+04   1.9243520e+03   8.5109040e+03   1.7532200e+02   1.7532200e+02   7.0646000e+02   2.8800000e+02   6.4021700e+02   2.0740000e+00   9.9800000e-01   1.0944000e+01   1.0260000e+00   2.4972000e+01   4.9400000e-01   9.5500000e-01   9.9800000e-01
   6.1750000e+00   1.8000000e+01   2.9797833e+04   2.3072200e+03   8.8466140e+03   2.4636800e+02   2.4636800e+02   7.7251000e+02   2.8800000e+02   6.7008900e+02   2.4950000e+00   9.9800000e-01   1.3052000e+01   1.0300000e+00   3.3979000e+01   6.7300000e-01   9.5500000e-01   9.9800000e-01
   7.1480000e+00   2.1000000e+01   3.8976637e+04   2.6780780e+03   9.1415170e+03   3.3205900e+02   3.3205900e+02   8.2778300e+02   2.8800000e+02   6.9445300e+02   2.9530000e+00   9.9800000e-01   1.5306000e+01   1.0350000e+00   4.3851000e+01   8.6800000e-01   9.5500000e-01   9.9800000e-01
[truncated: 3,048,951 more chars]
