# Supplementary material
Source: ML conference proceedings conference paper supplement (https://proceedings.neurips.cc/paper_files/paper/2020/hash/aab085461de182608ee9f607f3f7d18f-Abstract.html)
Supplement: Supplementary file 16 [file aab085461de182608ee9f607f3f7d18f-Supplemental.zip › supplemental/evidential_regression/data/uci/naval/Features.txt]

1 - Lever position (lp) [ ]
2 - Ship speed (v) [knots]
3 - Gas Turbine shaft torque (GTT) [kN m]
4 - Gas Turbine rate of revolutions (GTn) [rpm]
5 - Gas Generator rate of revolutions (GGn) [rpm]
6 - Starboard Propeller Torque (Ts) [kN]
7 - Port Propeller Torque (Tp) [kN]
8 - HP Turbine exit temperature (T48) [C]
9 - GT Compressor inlet air temperature (T1) [C]
10 - GT Compressor outlet air temperature (T2) [C]
11 - HP Turbine exit pressure (P48) [bar]
12 - GT Compressor inlet air pressure (P1) [bar]
13 - GT Compressor outlet air pressure (P2) [bar]
14 - Gas Turbine exhaust gas pressure (Pexh) [bar]
15 - Turbine Injecton Control (TIC) [%]
16 - Fuel flow (mf) [kg/s]
17 - GT Compressor decay state coefficient.
18 - GT Turbine decay state coefficient. 
