# Supplementary material
Source: ML conference proceedings conference paper supplement (https://proceedings.neurips.cc/paper_files/paper/2020/hash/aab085461de182608ee9f607f3f7d18f-Abstract.html)
Supplement: Supplementary file 16 [file aab085461de182608ee9f607f3f7d18f-Supplemental.zip › supplemental/evidential_regression/data/uci/protein/CASP.csv]

RMSD	F1	F2	F3	F4	F5	F6	F7	F8	F9
17.284	13558.3	4305.35	0.31754	162.173	1872790.507	215.359	4287.87	102	27.0302
6.021	6191.96	1623.16	0.26213	53.3894	803446.6966	87.2024	3328.91	39	38.5468
9.275	7725.98	1726.28	0.22343	67.2887	1075647.5703	81.7913	2981.04	29	38.8119
15.851	8424.58	2368.25	0.28111	67.8325	1210471.6295	109.439	3248.22	70	39.0651
7.962	7460.84	1736.94	0.2328	52.4123	1021019.6667	94.5234	2814.42	41	39.9147
1.7	5117.3	1120.99	0.21905	51.6732	672722.6969	79.5911	3234.21	15	41.2382
9.314	5924.16	1625.27	0.27434	70.2103	828514.514	76.8064	2821.4	70	39.4964
1.985	6882.15	1791.22	0.26027	77.2501	916516.5154	96.6785	3490.88	74	37.4203
1.915	12090	4190.74	0.34662	129.002	1687508.0466	186.309	4262.78	39	30.3916
1.495	7400.24	1881.95	0.2543	82.932	1023845.5575	104.697	3852.4	26	35.414
12.118	6556.77	1612.77	0.24597	71.6315	891544.3167	93.5329	3161.33	76	38.0433
0.884	8828.21	2658.63	0.30115	90.8578	1233384.3226	123.686	3194.3	22	37.2413
7.913	5637.37	2665.83	0.47288	49.8566	771635.4595	95.7431	2177.61	7	41.5268
14.103	9021.1	3097.91	0.3434	98.1155	1244159.792	121.348	3396.4	32	37.0667
6.581	17572.2	5226.42	0.29742	227.769	2434431.0858	296.8	4876	122	26.8169
6.11	12330.6	4380.2	0.35523	195.93	1710154.8772	232.154	4321.41	164	30.4491
1.339	8478.55	2206.94	0.26029	91.5054	1199770.2004	128.166	3996.13	164	33.5263
2.554	9147.09	2828.26	0.30919	104.05	1291446.5265	131.358	3595.69	17	35.5938
3.805	3905.51	1102.49	0.28229	34.2034	564398.7871	48.1646	1834.36	13	44.5123
18.645	15620.9	5834.18	0.37348	153.476	2184644.9774	251.225	5441.5	101	26.0101
8.114	18679	5966.18	0.3194	179.757	2650896.6604	268.661	6149.89	213	23.8081
18.404	13605.5	4766.37	0.35032	139.793	1925984.7735	182.195	4672.34	112	26.454
19.379	8693.56	3265.99	0.37567	55.4973	1258363.384	126.928	4890.54	15	36.3849
17.598	7727.36	1370.27	0.17732	77.5656	1035613.7203	103.177	3130.45	27	37.1829
16.102	8865.32	3317.32	0.37419	95.8075	1223687.6881	122.748	3509.39	38	36.7233
14.923	8259.29	2719.28	0.32923	76.1237	1087132.699	122.143	3763.75	58	35.5364
1.655	7136.22	2645.28	0.37068	64.1673	1032920.1669	93.2759	3213.99	28	34.6186
4.128	6922.15	2143.02	0.30958	63.6012	989631.0485	91.6472	3146.95	31	38.8427
1.477	6449.78	1439.3	0.22315	74.7722	849784.4944	90.5322	3393.06	80	38.21
2.165	13274.3	3989.12	0.30051	169.746	1855447.6165	198.644	5089.76	67	26.6638
16.897	11155.6	3383.81	0.30332	142.703	1573166.4194	159.059	4251.55	133	29.6432
1.875	11065.9	2869.88	0.25934	136.217	1521525.7535	165.503	4450.72	96	31.5521
2.961	14255.6	3036.48	0.213	177.375	2014077.1687	216.182	4906.57	68	27.2363
10.322	5687.57	1392.65	0.24485	50.4035	792414.6209	62.2368	2799	29	41.8993
2.243	5604.18	1379.29	0.24611	51.2823	733127.7429	88.9084	3556.88	22	40.9181
2.763	12178.9	3893.46	0.31968	168.83	1721985.8314	212.393	4638.08	101	29.4849
1.748	11904	3159.63	0.26542	146.12	1699204.1576	173.975	4729.37	23	28.8602
8.331	13339.8	5612.72	0.42074	137.687	1857627.0749	202.768	4782.8	97	30.1194
15.752	8103.71	2485.18	0.30667	69.219	1142647.041	114.831	3110.95	35	33.9611
1.975	3765.85	1173.67	0.31166	36.1042	513417.2226	48.2496	1387.7	17	44.3268
14.882	6390.08	2063.85	0.32297	53.3978	872065.7572	81.8471	2463.51	43	40.4188
2.795	19206.8	6204.77	0.32305	264.764	2613629.666	323.4	5824.63	327	20.992
5.16	6666.05	1686.88	0.25305	65.9476	939714.1696	82.0352	3281.68	24	38.3151
14.809	7848.69	2814.13	0.35854	69.4373	1060209.1168	110.639	4161.36	67	32.2311
3.422	13718.6	3715.87	0.27086	154.948	1897518.6179	218.768	5416.61	215	25.7936
7.039	9146.98	3036.24	0.33193	98.1126	1253333.9054	145.759	3718.51	34	32.8273
1.452	7320.95	1721.31	0.23512	83.8564	1013466.1991	107.91	3835.84	17	36.1333
1.872	9286.4	1973.48	0.21251	92.7215	1299052.6477	120.727	4154.38	37	34.1534
5.355	14751.2	3844.49	0.26062	129.951	1982604.2973	203.858	4734.76	141	28.8851
4.634	12994.3	3594.77	0.27664	127.696	1780330.3004	178.654	4162.11	31	31.8839
19.749	10112.5	3631.53	0.35911	91.7464	1408549.4219	139.366	3681.97	91	35.4758
19.425	15927	6062.61	0.38064	131.808	2260865.2884	222.346	6279.39	98	21.4247
18.294	5253.91	1917.23	0.36491	36.6466	728099.5067	72.3719	2516.59	8	43.4537
8.566	9036.08	3473.8	0.38443	86.956	1254059.7802	124.95	4069.6	43	35.12
5.337	13989.2	4278.01	0.3058	153.752	1914843.5791	208.278	5631.61	10	33.3157
18.896	9268.9	3644.78	0.39322	96.0626	1296934.714	146.825	3273.54	94	36.7149
1.45	4390.52	671.38	0.15291	43.5158	594617.1047	60.9313	2568.19	12	43.1653
2.903	6396.75	2109.17	0.32972	64.4799	833819.6971	99.5718	2639.72	27	38.7631
9.355	6099.5	2534.46	0.41551	45.7407	848790.5575	82.8123	2212.03	37	39.4936
7.878	5915.26	1855.78	0.31372	55.4459	811070.7193	84.3491	3200.58	13	39.4094
1.892	13641.7	3672.22	0.26919	186.821	1883836.0415	212.284	4579.84	185	29.1308
17.079	8201.73	2865.04	0.34932	70.4354	1161722.3389	107.544	3339.72	64	37.238
0	7355.24	1512.22	0.20559	75.0114	993282.8538	115.556	3464.68	27	36.6828
18.481	13117.3	6444.76	0.49131	135.214	1794765.5565	231.099	5094.41	140	28.2733
4.913	6888.76	2382.42	0.34584	69.2425	969929.7654	97.2336	3209.68	36	36.8904
2.862	7511.48	1975.72	0.26302	85.9864	1055770.689	114.437	3417.92	38	37.2338
1.308	5945.25	2067.54	0.34776	58.7093	829401.3045	86.5812	3468.26	75	38.0649
7.148	19381.6	5881.5	0.30345	200.191	2687598.3404	297.196	6046.82	230	23.0833
11.251	7113.82	2401.32	0.33755	58.5207	991382.5985	93.3787	3096.29	46	38.4703
0.825	25210.5	8648.76	0.34306	190.69	3531460.0224	425.786	15340.07	151	25.5013
20.674	14439.9	6664.37	0.46152	161.672	1995348.076	252.705	5609.69	177	24.8632
15.358	9489.2	2632.9	0.27746	76.1758	1304060.8233	123.313	4319.72	52	37.0363
10.22	14489.7	5293.09	0.3653	95.5332	1968812.3208	207.626	5232.24	146	26.0014
16.571	6443.43	2324.75	0.36079	74.6845	862755.8582	114.332	3399.6	47	37.146
3.092	9763.57	2749.97	0.28165	111.431	1357572.8132	171.103	4202.52	52	33.7255
13.466	4753.63	1867.23	0.3928	52.8294	673228.6926	90.8141	2153.8	50	43.3195
2.177	8864.96	1797.52	0.20276	108.601	1202026.8897	131.167	4035.59	41	34.2566
2.527	8946.25	2600.19	0.29064	75.657	1241334.7336	112.681	4149.97	61	34.5376
13.039	8476.85	3020.54	0.35632	76.504	1152763.2319	125.38	3460.52	13	37.3816
10.252	7182.05	2359.8	0.32856	55.8177	973376.0357	101.397	2801.82	19	40.958
15.72	6309.16	1368.9	0.21697	62.6281	872506.15	69.9426	2750.21	33	40.3847
1.966	14819.4	4779.48	0.32251	174.819	2075461.9727	243.318	5297.57	146	23.7504
17.288	10101.3	3170.45	0.31386	105.916	1405285.0047	131.564	4430.94	47	31.3757
4.43	13179	3998.54	0.3034	149.945	1839480.2722	218.111	4690.99	111	29.1008
3.768	8277.16	2452.25	0.29626	90.1924	1114155.986	119.617	4277.58	107	33.2524
19.19	16982.2	4743.63	0.27932	183.555	2347319.2903	197.328	5738.57	116	25.2664
1.886	9462.94	2141.02	0.22625	111.627	1279553.1047	146.12	4079.58	38	34.1076
8.394	5820.5	1928.93	0.3314	55.9336	802673.5573	79.2056	3160.55	11	39.5384
2.117	9070.43	2113.93	0.23305	108.079	1249834.4403	139.433	4026.5	40	33.9976
2.28	6493.69	1705.78	0.26268	52.9662	909941.987	76.9265	3342.87	56	38.6855
10.497	6603.47	2050.3	0.31048	60.1729	899943.9871	88.3253	3236.02	29	38.2353
3.343	14832.6	6164.22	0.41558	82.6568	2003376.4322	252.171	20981.17	47	35.1973
6.093	6438.11	1963.9	0.30504	62.1014	882545.325	88.4107	2565.03	19	40.4105
5.28	6387.19	1555.71	0.24356	58.4257	840997.0316	76.1158	3115.79	34	39.6168
0.86	12412.9	2676.14	0.21559	153.787	1704335.9597	201.049	5153.37	146	29.7538
9.815	10204.9	3381.03	0.33131	108.207	1431867.0064	159.552	3638.29	76	36.0665
10.029	6063.73	2388.49	0.39389	59.2914	857784.1039	85.3898	2693.96	35	40.3893
19.547	12488.8	4041.28	0.32359	117.986	1677721.3178	161.42	5160.26	64	33.2032
3.753	23470.2	7193.56	0.30649	300.766	3269017.3498	387.7	6382.79	105	17.579
17.989	12467	3952.53	0.31703	120.009	1625878.5126	174.196	4684.74	93	33.9687
5.832	7373.54	1850.94	0.25102	72.2748	1035995.4007	82.2271	3018.03	21	36.6733
5.233	8569.51	2095.52	0.24453	85.6867	1215084.0242	118.469	3889.37	73	34.4689
1.182	14940.9	3689.94	0.24696	184.622	2104849.3761	214.553	5713.2	65	22.938
16.64	7677.77	3548.1	0.46212	81.4507	932775.2759	138.648	2316.07	75	40.5953
15.978	15941.1	5573.22	0.34961	156.567	2220699.4572	230.304	7932.78	54	25.7623
10.46	8938.94	4149.05	0.46415	92.4123	1281623.6675	131.192	3735.31	28	34.3761
5.148	15238.1	4535	0.2976	184.645	2102521.5961	248.959	5255.77	93	25.5394
9.165	9880.43	2824.41	0.28585	107.046	1355619.9042	136.504	3984.69	36	35.878
3.055	6561.96	1900.04	0.28955	63.9857	908399.8364	86.6121	3896.12	70	37.5316
2.195	5503.56	1323.03	0.24039	44.6948	786838.387	58.5922	2418.02	12	40.1785
4.312	11862.6	2817.75	0.23753	149.415	1587896.809	179.633	4510.74	60	24.4228
4.201	14262.8	4948.28	0.34693	130.587	2059589.8368	200.803	4840.18	125	29.151
2.874	8565.25	1962.18	0.22908	109.253	1201938.5997	146.283	4199.49	54	33.5756
11.96	14091.3	5097.66	0.36175	93.4892	1892267.2453	203.56	4780.9	114	30.579
4.428	14313.8	4864.14	0.33982	91.8533	1972511.8001	192.799	5070.02	149	28.5373
13.262	7635.65	2921.49	0.38261	61.1173	1048506.1217	105.709	3839.42	68	37.6294
18.137	9465.28	3017.2	0.31876	74.5875	1332420.0153	121.595	3741.08	53	37.4545
16.424	10572.7	3233.1	0.30579	95.8645	1425814.6266	161.418	4149.91	148	32.7768
19.628	15047.2	7020.1	0.46653	146.818	2087834.9087	249.015	4369.72	101	30.2627
3.886	19377.1	6378.16	0.32915	251.838	2673543.0312	318.066	5476.33	79	23.3446
12.32	9416.38	3637.32	0.38627	95.3281	1335252.9197	149.767	3866.18	90	35.4438
2.281	9053.62	2140.44	0.23641	86.9486	1288339.6787	108.191	4592.65	28	33.5188
5.532	7258.6	1383.35	0.19058	60.1399	1016992.519	76.4939	3446.44	47	37.7726
8.943	6627.94	2782.23	0.41977	62.1561	954949.3657	94.2195	2404.72	67	40.4961
3.693	17836.1	5278.61	0.29595	158.42	2512040.5785	253.024	5574.37	196	22.1107
11.733	4236.27	1376.4	0.3249	35.0902	576542.2839	54.2159	1426.57	34	44.3511
12.456	4838.86	1692.92	0.34985	46.3231	700043.1802	73.4881	2464.66	53	42.0444
11.683	8319	2654.18	0.31905	63.0818	1187976.5449	104.285	4248.88	45	37.8182
1.516	7511.85	1688.14	0.22473	86.303	1046228.3288	104.778	3840.11	25	36.2923
2.212	9482.44	2722.6	0.28712	102.246	1313907.5414	129.849	3869.28	14	33.9961
6.577	14465.7	4985.91	0.34467	102.038	1969329.7431	200.921	5037.19	146	27.7611
13.561	8077.33	1955.89	0.24214	69.5043	1134998.6449	102.856	3542.57	16	36.7329
0.556	9253.84	2652.01	0.28658	100.135	1266476.1288	160.321	4149.07	72	33.192
10.503	9054.19	3110.39	0.34353	100.999	1252553.576	145.086	3905.01	34	33.7522
2.993	11171.3	4172.41	0.37349	111.065	1650162.6262	154.318	4549.79	72	31.1566
0	7735.44	1706.44	0.2206	73.5278	1097281.6446	104.053	3952.37	49	35.0952
5.331	5228.85	1610.46	0.30799	48.6731	747852.3998	54.9062	1993.13	3	42.392
6.237	5941.69	1608.25	0.27067	59.8822	802172.2225	78.5753	3188.62	36	39.2894
13.336	9897.86	3043.84	0.30752	90.1432	1377066.1863	124.172	3530.74	65	35.5621
8.588	15505.2	5366.03	0.34607	163.5	2198535.6403	229.896	5903.91	152	26.7838
4.027	8428.96	2058.58	0.24422	96.4205	1194829.6782	119.74	3806.6	56	35.1576
5.298	5709.34	1421.13	0.24891	52.3057	789879.8074	82.9841	2645.72	33	40.838
17.583	6724.16	1799.22	0.26757	61.7573	922185.232	92.2208	3265.8	25	38.0097
2.073	13614.3	3796.36	0.27885	172.157	1879564.3348	197.959	5100.57	64	26.6874
19.205	14036.1	4798.67	0.34188	199.948	1971735.5746	229.154	4878.21	141	23.0604
13.988	11638.1	4583.39	0.39382	132.548	1603413.7904	181.688	4621.89	90	29.3328
3.805	12874.5	4174.61	0.32425	153.051	1768452.7926	196.773	4558.93	45	30.4081
3.132	6488.31	1968.19	0.30334	58.0428	850979.0102	87.7534	2672.19	42	39.1787
3.058	19195.5	6411.46	0.334	201.013	2565705.5022	301.331	5596.76	177	23.3663
11.934	7649.47	2421.72	0.31658	64.3883	1098224.7186	93.0226	3787.69	46	38.4719
18.823	8134.82	3106.02	0.38181	69.7501	1146484.3504	114.279	3311.01	30	37.2873
3.05	9068.27	1995.18	0.22001	96.7449	1281607.0094	130.622	3854.62	48	34.9438
2.159	9543.45	2234.61	0.23415	111.864	1324950.2436	132.213	4221.34	56	34.3281
13.335	6981.89	2188.04	0.31338	63.4287	966942.0505	101.125	3509.9	59	37.3867
15.214	8779.59	3421.12	0.38966	101.734	1253256.0577	134.156	4664.17	108	33.8939
8.811	16733.4	6088.38	0.36384	133.856	2382250.0225	244.839	6468.15	57	24.3735
0.842	11946	2737.53	0.22915	146.199	1631820.7653	198.922	4893.82	138	29.3127
1.625	12664.1	4082.6	0.32237	152.535	1800547.6985	210.449	4941.61	75	29.2647
15.663	11837.3	5049.76	0.42659	96.3511	1691186.5877	160.48	5165.75	49	37.2482
1.429	14566.9	3309.42	0.22718	182.402	2032596.1915	203.438	4063.98	148	32.0099
11.325	8625.69	3417.3	0.39617	73.5595	1231463.9387	111.509	3655.45	19	37.9844
15.929	8961.98	3421.6	0.38179	89.8607	1237735.3762	143.956	4021.18	34	35.2142
1.815	6612.86	2245.81	0.33961	62.407	922140.961	98.9037	3822.42	73	36.0666
16.462	6570.06	2560.55	0.38973	54.0008	863197.0061	108.933	3450.97	58	34.0708
4.342	6423.19	1188.1	0.18497	54.1855	847714.8902	70.9529	3244.2	40	38.0433
16.226	10551.9	3648.65	0.34578	87.8739	1522562.7981	150.498	4785.48	41	32.897
1.866	9306.91	2763.1	0.29688	100.055	1293200.1773	134.741	3496.76	120	35.0083
16.704	8573.63	2441.18	0.28473	61.3221	1204334.8172	100.48	3057.59	41	36.8556
11.249	16198	5391.66	0.33285	130.407	2298971.8028	225.87	5510.17	68	24.9599
9.007	7438.56	2442.88	0.3284	91.5449	1051582.324	99.3233	3452.36	27	36.9505
14.695	5967.66	1103.91	0.18498	52.5181	816963.0989	73.5838	2396.34	25	40.5292
3.052	13942	4074	0.29221	173.422	1982904.3912	198.751	4737.9	63	28.5884
3.17	8650.62	2425.01	0.28032	93.6804	1189130.0386	113.477	3636.6	39	35.1771
6.135	3375.97	1248.27	0.36975	24.5279	461737.1434	44.7686	1392.54	6	45.2663
2.23	10984.9	2665.08	0.24261	128.471	1488623.977	154.596	3686.64	16	34.564
19.755	8492.7	1958.19	0.23057	68.9086	1217185.4953	94.9999	3204.77	72	39.1549
3.778	5208.71	1214.92	0.23324	45.0719	722102.5886	71.2471	2681.78	17	40.4347
4.711	8138.85	2013.88	0.24744	96.6283	1149753.0969	101.841	3852.27	89	34.8174
7.928	5964.08	1950.12	0.32697	54.1675	815584.1398	83.6522	3160.93	12	39.5247
10.496	6746.08	1940.55	0.28765	67.9976	944219.3498	83.7765	3678.39	46	37.111
18.975	27671.4	10795	0.39011	268.687	3858804.0457	390.84	6353.75	168	23.402
11.022	18210.9	5745.37	0.31549	238.461	2484834.7616	318.982	5106.17	152	25.2792
6.423	6128.98	1451.85	0.23688	58.5824	827526.3708	78.7861	3202.84	27	39.0369
2.415	8398.47	2249.84	0.26788	90.9179	1184997.2157	123.07	3324.29	5	36.0082
18.162	12211.9	3656.73	0.29943	144.565	1722973.2242	164.091	4484.16	120	30.7101
12.872	4214.24	557.34	0.13225	39.7192	573782.0462	45.3279	2214.94	32	42.508
3.475	10243.6	3542.33	0.3458	89.3464	1471456.3229	142.423	3634.06	17	34.8223
1.753	9472.53	2244.6	0.23695	101.677	1321527.2096	134.816	4228.2	57	34.1433
3.42	9377.46	2104.36	0.2244	96.8279	1317344.8562	127.16	3855.91	52	34.8935
1.836	7127.24	2051.3	0.28781	68.4997	955422.7452	101.928	3606.84	85	37.2029
1.112	22638.1	5492.36	0.24261	337.405	3115601.7201	400.968	6217.11	155	19.8168
2.235	6537.05	1886.15	0.28853	69.366	935147.8733	81.6642	3159.38	13	39.4065
0.525	8682.58	2348.39	0.27047	98.1656	1221977.8772	130.857	3224.91	4	36.9912
11.219	3926.54	1157.77	0.29485	35.0194	534838.3448	50.008	1379.88	32	44.5265
11.794	10286.9	2922.37	0.28408	101.52	1463771.0961	146.511	4109.62	53	35.1281
2.323	7343.45	2773.7	0.37771	81.5535	1013734.8737	100.215	3356.73	57	38.5808
12.184	6303.94	2044.34	0.32429	36.6719	873947.8034	82.6206	2267.77	22	40.3577
11.327	4707.45	1784.38	0.37905	46.9947	681089.7568	67.6508	2345.3	58	41.3947
17.162	15147.5	5488.1	0.36231	142.337	2096988.2596	216.924	4699.81	98	29.1559
1.396	4246.02	1318.58	0.31054	35.6454	588383.8786	50.6559	1406.68	17	44.183
14.844	8232.2	1411.25	0.17143	77.4649	1113050.0572	102.051	3314.26	39	38.3958
3.301	6616.94	2182.14	0.32978	57.9753	931694.8721	92.4921	2822.48	42	39.9718
6.776	7912.45	1833.69	0.23174	71.7206	1080240.257	98.1802	3624.56	36	36.033
2.249	5957.05	1748.24	0.29347	43.1966	870833.6701	70.9541	2495.7	25	41.6257
1.662	9339.74	2799.06	0.29969	102.632	1276924.6648	136.928	3589.78	120	33.5974
2.935	8655.89	2220.6	0.25654	98.0298	1216529.7371	127.111	3774.84	46	34.7488
1.009	7190.75	2802.08	0.38967	64.3859	1055075.1829	99.8715	3203.47	29	38.8401
14.138	7719.08	2106.52	0.27289	62.2261	1069262.6857	100.651	3401.75	36	37.7466
18.877	13223.7	5870.04	0.4439	129.997	1831284.9512	204.903	4888	104	32.1747
4.951	8387.19	2278.04	0.2716	91.7564	1178104.0129	109.957	4083.76	125	34.6103
1.561	21862.9	6451.46	0.29508	307.897	2964339.1735	314.71	6669.32	290	20.0154
2.164	4754.13	963.74	0.20271	46.3356	665571.0919	60.5912	2785.42	13	42.1188
17.473	14778.4	4963.9	0.33588	141.718	2039977.4307	227.069	4136.7	152	30.8605
1.445	7505.08	2298.93	0.30631	78.819	1018824.3938	118.945	3106.21	76	38.9252
3.526	9189.4	2166.63	0.23577	82.0928	1313125.7494	122.16	3845.67	22	35.6074
16.055	7712.45	2912.02	0.37757	75.0895	1089567.0719	102.352	3972.32	35	36.0524
11.987	6321.9	1855.13	0.29344	63.9151	865087.6989	65.0437	3207.91	36	38.5378
7.824	6235.27	1787.24	0.28663	50.4699	882909.2988	91.1659	3307.91	10	38.57
3.204	10728.9	3122.13	0.291	115.096	1482321.848	174.449	3820.22	22	33.3138
7.099	9846.72	2284.11	0.23196	98.98	1356945.4109	120.386	4272.36	52	33.4137
1.653	5958	2062.3	0.34613	70.8099	825472.1945	88.2903	3030.17	34	39.2735
2.128	17523.9	4995	0.28503	224.449	2443665.0469	278.382	5692.07	199	22.0718
0	6812.34	2568.01	0.37696	60.4717	989494.5351	90.1892	3259.48	34	38.9395
2.056	9695.73	2541.87	0.26216	100.183	1382115.1196	152.25	3894.4	41	33.5747
17.877	11139.5	3900.88	0.35018	84.8751	1596337.2852	144.338	4908.92	73	34.9302
2.817	8094.96	2372.41	0.29307	81.918	1117757.2287	103.785	4400.49	59	33.8533
0	7932.62	1994.97	0.25148	69.8073	1110612.1989	115.515	3623.06	4	35.7825
3.043	8579.71	2290.75	0.26699	119.991	1164358.1187	130.106	4057.75	111	33.5585
15.915	7016.08	2354.65	0.3356	53.6786	995986.3272	88.663	3344.51	3	40.2953
5.808	5839.74	1658.76	0.28404	58.8301	779812.2483	81.8107	2989.34	37	40.0981
3.627	10607	2738.29	0.25815	130.287	1460329.48	157.268	4824.33	71	29.5595
3.045	7650.22	2418.75	0.31616	70.0034	1040703.4256	102.538	3419.04	74	36.8497
3.891	10040.4	2437.71	0.24279	87.9793	1417015.4875	129.728	4785.52	28	32.3895
2.099	9477.6	2961.1	0.31243	87.7097	1281181.8515	129.155	3888.62	41	35.0208
15.266	13109.3	4629.25	0.35312	127.375	1864371.8546	172.726	4887.31	147	29.3633
2.329	4357.76	798.49	0.18323	39.4932	573535.7002	62.5392	2624.54	12	43.4835
15.9	9567.13	2715.47	0.28383	90.2935	1385359.9525	125.993	3739.18	75	35.4598
8.607	7852.92	2399.29	0.30552	64.9361	1087675.6324	98.7637	3472.04	47	37.2743
18.646	13435.4	5997.24	0.44637	97.827	1879137.5728	200.491	3895.12	112	32.7497
1.426	13147	4100.1	0.31186	153.852	1858378.5443	214.358	5004.43	76	28.7302
1.185	7994.54	1960.8	0.24526	90.5908	1068702.8578	130.362	3416.95	15	37.2435
4.698	7932.81	1998.26	0.25189	68.6431	1079913.9848	110.033	3466.68	39	35.4187
14.826	5643.51	1524.53	0.27013	61.2316	713353.0304	87.2559	3103.09	16	35.8947
19.876	13279.2	5970.64	0.44962	171.298	1831913.5524	254.768	63609.66	111	31.204
1.926	8983.73	2538.17	0.28252	85.1632	1230019.4476	120.196	3850.61	26	34.8366
7.486	8821.12	1500.28	0.17007	77.7086	1191043.0066	99.3303	3757.55	39	36.5089
1.249	14993.4	3895.45	0.25981	184.224	2122391.0771	217.616	5696.71	69	23.0322
9.012	5003.71	1603.83	0.32052	39.7905	665335.0591	71.8347	3138.33	15	41.7761
1.303	14933.1	4716.58	0.31584	152.903	2070500.9156	231.286	5358.54	194	26.3754
20.546	12598	4287.08	0.34029	157.752	1753511.6122	216.178	4445.21	151	30.8784
9.726	17616.1	6248	0.35467	131.37	2325485.2803	260.737	5229.49	157	25.8162
17.395	8454.76	2114.97	0.25015	56.1939	1180792.9901	97.7716	3601.37	27	39.8544
2.375	4380.89	1164.74	0.26586	45.0019	552992.2161	63.9749	2026.36	22	42.8624
12.987	7229.32	2192.61	0.30329	55.335	999123.469	93.4638	3336.69	25	38.2677
5.562	5233.78	1168.13	0.22319	53.475	727935.2732	63.4258	2812.04	17	39.8232
14.014	7383.37	2124.26	0.2877	62.2165	1059770.3568	90.9051	2420.26	68	39.9775
14.307	8959.42	3732.93	0.41664	71.8185	1275908.2251	133.02	3428.72	21	35.1539
4.786	8224.38	2547.01	0.30969	90.0116	1112973.166	117.026	4274.11	103	33.3403
0.597	9501.27	2682.04	0.28228	99.4986	1297886.0328	160.406	4141.77	75	33.2323
19.471	7069.72	2549.7	0.36065	66.2801	973415.5286	134.424	3178.93	44	36.5519
19.541	14302.7	5336.33	0.37309	85.3488	1994687.6137	228.008	5772.5	104	28.5364
1.707	13849	4025.42	0.29066	200.833	1927500.0735	250.612	5301.93	284	24.9407
7.719	7283.24	2127.19	0.29206	88.7824	1009013.6967	106.115	3322.4	27	37.7619
19.031	11572	3859.8	0.33354	145.557	1576695.6308	187.1	4800.12	100	29.0516
2.54	9991.02	2293.38	0.22954	97.1939	1380871.3202	125.946	4406.82	39	32.7496
1.62	6707.24	2183.14	0.32549	63.5459	906383.6663	100.703	3121.59	18	40.2996
14.451	6373.95	2275.84	0.35705	64.3785	883935.0676	85.7568	3430.13	74	37.0221
10.7	4897.61	1434.99	0.29299	43.6804	691488.5232	65.5956	2524.74	43	42.7808
14.744	8646.41	2574.14	0.29771	52.0932	1173611.7112	114.639	3889.6	26	36.0445
2.001	11770.4	2922.4	0.24828	157.325	1621157.0339	185.562	4185.27	62	31.8218
9.502	5856.63	2290.52	0.39109	45.9514	841418.3035	85.1854	2556.66	39	42.6898
16.489	9604.43	2800.07	0.29153	74.6886	1356682.3863	116.545	3936.24	38	33.7705
16.861	8701.13	3483.86	0.40039	38.5302	1154738.7053	120.883	3898.68	85	38.2897
7.709	6537.28	1928.44	0.29499	55.3075	888944.6155	90.0879	2429.71	25	41.5172
11.196	12310.4	4958.98	0.40282	102.735	1729155.359	169.894	4191.26	67	32.9828
1.259	5578.33	1116.13	0.20008	57.6882	775580.7078	74.8081	2649.52	24	40.7863
1.308	7185.81	2657.96	0.36989	63	1046311.8021	99.356	3242.14	28	38.8903
4.019	14851.9	3486	0.23471	212.809	2053400.6052	244.054	5101.51	148	25.3752
2.66	16114.6	4112.86	0.25522	163.922	2300850.1133	214.214	4927.93	43	27.1584
4.696	12436.1	4176.39	0.33582	164.887	1725674.2325	188.556	4862.49	61	28.4846
3.58	5730.81	1967.46	0.34331	68.4013	797603.6883	79.4927	3693.36	74	38.6164
4.225	14351.5	4600.87	0.32058	158.776	2055434.4357	217.106	4726.06	64	28.5601
2.408	12782.9	3673.28	0.28735	155.657	1796812.1181	190.74	4745.77	78	29.0838
7.633	9290.34	2899.14	0.31205	69.1241	1302337.7456	138.459	4334.85	7	33.154
16.306	10938.6	3623.23	0.33123	102.004	1522320.9658	150.814	4601.06	120	31.1182
5.204	8084.92	2211.55	0.27354	90.7685	1074229.7433	135.242	3828.57	34	30.6645
16.475	7326.62	2586.71	0.35305	67.9097	973304.9044	107.539	3092.22	40	39.5324
0.647	7863.06	2003.24	0.25476	84.5573	1101691.5489	125.65	3129.74	4	36.9864
18.984	7092.65	2480.66	0.34975	61.0407	960828.1648	104.731	2767.93	32	40.1347
4.635	9870.54	2678.82	0.27139	121.933	1379853.7702	150.736	4313.61	68	32.9661
2.395	7524.91	1907.53	0.25349	68.8851	1087785.6591	98.5949	3114.16	20	37.5996
11.376	8184.24	3051.84	0.37289	81.6815	1111115.6919	110.582	3623.31	28	36.3253
18.242	12131.3	4823.71	0.39762	99.396	1686541.0553	180.92	4094.79	47	33.3562
15.928	5197.92	2137.67	0.41125	33.2291	734409.5982	70.5348	1653.3	39	44.9336
5.652	7100.26	2144.7	0.30205	57.2757	961820.361	100.955	2913.93	15	38.6264
2.351	16970.3	5587.31	0.32924	206.693	2229253.2797	269.656	6137	246	21.934
1.852	5495.29	1780.71	0.32404	67.466	754891.2887	79.4929	3006	31	40.4661
4.105	21350.9	6977.62	0.3268	259.555	2973844.4465	331.927	5545.56	139	23.3018
8.413	8559.01	2014.21	0.23533	59.3272	1216662.2975	91.0821	3189.03	27	38.5358
12.228	6060.88	1540.7	0.2542	70.8151	816576.0362	91.1852	3185.82	46	39.131
3.317	11222.3	3670.91	0.3271	126.764	1541143.7816	164.489	4898.56	70	29.051
2.803	14281	4251.36	0.29769	175.349	2015506.6832	230.894	4504.94	25	30.0785
11.404	3881.88	1235.68	0.31831	34.6864	527278.5092	49.785	1364.94	34	44.6544
12.661	8133.47	2539.33	0.3122	57.8653	1176948.5736	99.793	2947.52	11	38.2708
6.974	8582.61	2140.11	0.24935	96.0488	1165650.3021	97.7347	4002.35	14	36.7452
11.533	7206.33	2290.14	0.31779	50.3814	1006527.8502	93.7626	3899.96	34	37.509
2.322	6092.64	1713.8	0.28129	53.7129	852409.6624	75.9776	3229.48	52	39.8182
6.128	14111.3	4782.41	0.3389	162.125	1966582.2746	230.214	4766.99	103	28.9236
17.726	6066.88	1094.14	0.18034	58.0753	802779.6483	64.668	2999.04	34	38.2889
18.568	7736.94	1731.4	0.22378	84.363	1092857.3366	122.578	3583.44	96	38.3041
4.204	7243.53	2057.07	0.28398	66.6182	1008189.3213	96.0069	3064.05	55	39.2259
3.756	9105.05	2110.11	0.23175	97.8518	1278955.1769	128.357	3997.26	47	35.0869
3.399	8267.73	1951.89	0.23608	86.3387	1166105.4749	97.6918	3759.4	64	35.4199
16.603	7868.71	3048.23	0.38738	60.0247	1060141.0352	112.365	3918.99	77	36.0453
4.402	4957.58	1312.72	0.26479	40.6577	686352.7697	59.0011	2595.21	57	41.6938
11.403	5759.81	2144.38	0.3723	45.2132	817838.7144	92.3981	2578.23	33	41.7571
17.008	21079.5	6223.71	0.29524	209.433	3018973.5423	314.332	6596.12	265	24.4139
2.358	18414.5	6744.4	0.36625	243.217	2524198.4621	267.523	5634.7	114	22.4298
5.4	14346.1	5177.45	0.36089	163.663	2001887.9375	211.837	4996.08	79	27.5044
3.973	6146.86	1050.45	0.17089	55.4867	857405.8131	64.3761	2993.73	12	39.9338
9.75	3620.51	1303.39	0.36	25.6829	495275.5282	45.5509	1446.34	16	45.5846
17.987	8836.03	2438.71	0.27599	90.1977	1189598.9869	133.834	3974.55	34	34.6692
19.252	9076.95	3689.68	0.40648	100.531	1242079.2961	176.627	3668.55	130	34.8231
3.526	5285.02	1741.93	0.32959	42.3724	733610.4277	66.8685	2883.56	51	37.7907
17.682	11280.9	3498.64	0.31013	117.303	1616198.7783	158.503	3669.71	155	36.0225
4.841	9196.63	2722.02	0.29598	79.4848	1278710.1842	114.914	4407.36	64	34.214
5.525	7021.54	1647.68	0.23466	64.2898	972562.6692	88.6381	2862.19	78	38.9359
1.101	14500.7	4149.06	0.28612	188.928	2009304.1203	224.308	5591.38	141	22.8253
3.531	21345.5	6810.63	0.31906	254.793	2983406.0672	339.794	5548.79	69	23.165
17.514	12752.1	4314.2	0.33831	138.527	1798176.8846	205.479	4399.77	91	31.2542
14.66	6090.46	1953.25	0.3207	54.5619	834053.7465	81.8578	2360.37	43	41.4924
1.043	5279.17	1136.55	0.21528	45.9736	757722.5142	70.9922	2852.09	58	40.2008
2.878	13691.2	4020.17	0.29363	150.641	1886546.6239	196.645	4680.62	34	29.5894
2.787	11123.9	2954.92	0.26563	128.728	1512116.6882	159.407	3855.75	22	32.6841
8.014	8175.26	1449.24	0.17727	75.9565	1102323.2711	101.904	3524.49	31	37.6154
4.009	10917.8	4835.73	0.44292	141.774	1480520.7979	202.774	4547.58	174	30.1289
7.069	6645.65	2283.01	0.34353	48.4476	855359.0726	103.239	2208.51	43	42.2603
4.505	5421.59	1768.68	0.32622	61.4863	709565.4118	88.6788	2676.52	26	41.08
20.032	12363.8	5528.2	0.44712	103.047	1605975.6337	221.715	4873.33	76	31.7337
5.259	9627.26	2907.16	0.30197	100.714	1358204.8702	140.282	3887.03	17	34.624
11.808	8136.96	2359.37	0.28995	87.7108	1116842.4647	94.4821	3783.17	24	34.8164
5.248	14185.9	4391.91	0.30959	177.768	1960618.5457	241.491	4341.08	37	30.0177
0.639	9486.06	2662.65	0.28069	97.6645	1301490.6208	163.081	4147.26	74	33.1873
2.378	17765.6	6211.05	0.34961	238.807	2396953.1571	281.706	5585.03	142	20.6939
15.046	8582.47	3289.88	0.38332	95.6102	1166992.2968	149.449	3805.41	62	36.252
12.951	7292.83	1393.58	0.19108	67.0089	1021411.8178	88.5438	3121.83	66	39.5447
15.482	7662.61	3160.41	0.41244	71.1874	1011149.7734	118.999	3093.33	87	39.0601
1.611	13692	3664.12	0.26761	192.966	1877160.3123	220.066	4575.84	178	29.1416
4.052	16222.8	4388.63	0.27052	241.386	2200152.7553	266.94	4807.68	285	27.5003
1.502	12271.9	3206.91	0.26132	148.646	1756609.0781	174.952	4683.91	28	29.0243
3.281	11983.9	3455.57	0.28835	127.037	1705213.8886	173.058	4463.94	48	30.7803
2.758	8225.76	2882.55	0.35042	75.7976	1153804.5858	124.457	3407.27	43	36.9368
0	8589.53	1928.45	0.22451	58.7719	1203016.7752	95.4863	3379.23	23	41.3394
5.055	8383.67	2646.68	0.31569	91.1684	1127697.6562	136.085	3981.74	40	35.6039
1.973	11928	3000.9	0.25158	146.741	1650510.1043	201.477	4185.32	69	28.9619
1.103	7338.46	2878.88	0.3923	63.8447	1071102.7571	97.6804	3210.96	29	38.8758
2.76	8951.77	1845.58	0.20616	97.1566	1252392.8859	120.787	3851.55	67	34.9325
9.889	8337.58	1373.65	0.16475	75.0922	1105067.3678	100.708	3905.7	30	38.1016
19.999	12191.1	5514.78	0.45236	104.703	1666160.6855	202.288	6400.03	157	27.5843
2.063	9615.89	2773.12	0.28838	97.6692	1360345.6396	136.638	3677.27	128	35.5624
3.278	5590.71	1430.92	0.25594	43.5552	796191.4496	67.1495	2509.66	5	40.1836
15.261	19893.2	7981.31	0.4012	268.362	2718097.5038	344.794	6021.41	251	21.0973
12.732	4828.14	1144.12	0.23696	41.5757	665465.9299	66.7739	2653.5	26	39.6355
4.478	7307.16	2809.19	0.38444	68.0522	1046395.9725	96.8965	3968.69	71	37.0487
0.869	14499.5	4049.68	0.27929	193.125	2009138.7833	222.581	5614.67	136	22.9619
12.674	8538.14	2668.38	0.31252	59.8675	1201414.3924	111.193	2946.7	8	37.8822
5.381	18084.1	5727.87	0.31673	243.602	2492372.4963	307.333	5345.72	277	25.796
1.349	10849.3	2680	0.24702	153.695	1528536.5991	189.236	4607.59	60	29.9254
2.163	9500.28	3239.22	0.34096	103.535	1336832.8145	131.869	3712.25	14	35.0263
9.98	6373.6	1619.07	0.25402	65.4305	894051.1456	70.2733	3644.79	76	38.9086
12.67	6001.6	1731.09	0.28843	55.7944	820445.0505	84.6195	2455.92	27	40.3259
1.103	8016.56	1735.13	0.21644	76.1742	1144925.7809	111.2	3921.46	103	35.5075
2.378	8463.57	1890.01	0.22331	81.6124	1194357.9369	100.217	3832.19	10	34.2998
2.72	9228.49	2912.83	0.31563	85.4307	1291535.2849	139.253	3919.22	3	34.9569
17.599	8426.32	2598.91	0.30842	96.8621	1102634.1303	137.444	3730.33	92	36.2785
19.972	13530.2	5287.22	0.39077	125.763	1862372.4706	207.932	4456.19	80	30.5366
11.26	6300.44	2765.23	0.43889	50.8074	887016.4585	117.273	2711.51	64	39.8185
4.463	16055.9	4006.08	0.2495	245.457	2190553.2368	245.576	4800.32	296	27.952
16.086	7532.5	2695.13	0.3578	70.9431	1006716.2268	124.743	3806.56	67	32.0464
2.111	7362.61	2020.68	0.27445	69.8312	1017506.1388	100.83	3565.63	35	36.2455
9.192	8128.99	1777.57	0.21867	74.2097	1119717.7572	104.006	3674.01	38	46.5464
5.201	10050.7	3432.52	0.34152	100.248	1479591.8724	158.077	4193.46	79	33.3289
2.599	15397.7	4693.97	0.30484	177.856	2095614.9697	205.628	4930.46	189	28.9037
3.091	11021.1	2927.33	0.26561	128.51	1571307.37	170.061	4415.67	51	31.9363
20.123	12223.8	3838.15	0.31398	113.778	1792437.2815	175.184	3546.37	157	36.4599
2.305	14666.4	4711.02	0.32121	155.193	2102955.9192	244.44	4961.75	48	27.0535
5.863	16993	6107.21	0.35939	184.077	2299775.5597	293.908	5614.48	175	26.2127
3.372	22771.3	7039.69	0.30914	315.611	3143441.6371	374.362	6283.2	107	17.6111
4.024	12116.8	4762.59	0.39305	104.316	1714800.5897	182.264	3913.39	13	35.2339
3.633	10657	3911.79	0.36706	127.704	1470392.6811	181.454	3876.55	29	33.7359
3.63	13876.1	3964.62	0.28571	162.64	1989499.0537	228.383	4559.79	51	26.4972
4.458	14749	3118.47	0.21143	179.213	2068895.1715	228.623	5029.42	85	26.9522
5.277	12973.7	4823.83	0.37181	106.421	1768836.7153	199.288	4737.28	143	28.9887
2.06	6037.98	2059.88	0.34115	57.917	841162.0466	88.1167	2695.67	41	40.6986
2.508	9413.22	2295.75	0.24388	88.1962	1350331.8144	116.696	4057.57	91	34.9538
1.823	7262.21	2375.39	0.32708	76.1827	1003327.6883	97.2383	3760.94	32	36.0888
1.896	11251.1	3138.14	0.27891	133.744	1551513.7481	162.209	4441.62	92	31.2951
2.668	14945.6	3725.47	0.24926	204.762	2052061.1656	260.693	5059.68	172	25.4996
3.142	8335.12	1722.68	0.20667	98.5435	1192653.4115	115.941	3777.89	44	35.3459
2.19	9514.76	2508.56	0.26364	119.814	1308243.1194	134.979	4161.09	117	30.695
3.255	10518.9	2479.54	0.23572	90.2555	1472291.3492	143.905	3833.52	127	34.7249
4.106	14187.3	4405.73	0.31054	135.661	1986292.2088	195.261	4790.23	72	29.2641
11.489	5547.66	1652.92	0.29794	72.3963	744081.8917	86.7232	3302.46	46	38.8729
6.847	14909.3	4689.81	0.31455	169.339	2050688.6188	225.364	5501.12	125	24.8631
2.822	8699.34	2655.55	0.30525	114.433	1190281.808	141.486	3802.77	79	34.9589
19.979	16110.7	7118.02	0.44181	135.575	2087911.0911	276.53	4546.48	109	30.4611
15.129	7256.87	1369.6	0.18873	59.6107	1064181.9264	94.23	2429	68	41.158
2.174	11276.9	2643.64	0.23442	131.11	1553152.8718	150.889	4413.65	82	31.1018
9.138	16211	5552.93	0.34254	173.601	2301749.2199	269.49	5573.02	203	27.0069
16.204	8307.96	2551.5	0.30711	64.7983	1205565.4627	114.74	3242.93	54	38.6993
7.836	5967.56	1933.09	0.32393	53.6928	815263.6143	84.5481	3193.53	13	39.4006
2.042	13137.3	4252.33	0.32368	149.96	1858133.5804	198.035	5120.67	170	28.6494
9.784	4905.85	1682.4	0.34293	29.4286	698316.233	60.2098	2406.4	43	42.7271
6.74	15354	5087.48	0.33134	164.36	2095976.7908	205.404	5036.29	69	27.4565
10.98	8636.8	3071.58	0.35563	80.0328	1157857.8114	118.746	3860.18	37	36.9665
3.066	12953.2	4316.91	0.33326	135.224	1823967.013	194.695	4334.67	49	31.5703
14.049	5493.85	1386.82	0.25243	64.5563	735958.3097	82.1428	2605.38	56	39.8607
17.655	7146.9	2529.47	0.35392	59.1501	928367.5806	120.073	3149.28	57	38.1424
2.022	11711.6	3154.24	0.26932	135.474	1615308.0184	157.458	4496.1	89	31.3426
17.174	14998.9	5506.9	0.36715	125.808	2095741.4854	197.676	5730.25	143	28.3517
3.288	15437.9	5936.43	0.38453	184.715	2143910.2146	255.682	4382.36	54	26.259
1.539	7034.32	2238.05	0.31816	76.4392	963134.9793	111.301	3069.56	82	39.1113
2.115	5427.7	1465.63	0.27002	62.2391	674705.3681	87.8011	3081.19	16	39.6066
1.809	6537.05	1886.15	0.28853	69.366	935147.8733	81.6642	3159.38	13	38.7006
0	12339	3986.99	0.32312	123.035	1700544.4946	183.307	5350.54	41	46.5464
1.861	10668.2	3193.78	0.29937	124.703	1442020.5109	166.742	3958.03	34	33.3029
1.755	10701.2	4290.99	0.40098	134.791	1431977.265	205.483	4546.55	176	30.9772
7.416	11857.6	4007.22	0.33794	108.994	1714910.1029	173.5	4706.27	67	30.2233
11.343	17973.7	6713.95	0.37354	177.584	2485984.0748	284.475	6067.1	67	27.8107
6.226	12694.9	4499.34	0.35442	164.648	1797808.0233	231.88	4675.03	109	29.2103
17.781	16673.9	5272.74	0.31622	195.466	2280821.1037	256.632	6192.24	198	19.5094
2.909	9705.04	2789.49	0.28742	93.8699	1334602.1871	123.103	3907.34	40	35.0412
1.144	3622.05	959.51	0.2649	35.3647	511052.1659	43.6535	1788.7	12	44.5204
20.493	11937.1	3818.79	0.3199	112.535	1649239.8129	166.291	4826.69	120	31.2096
1.932	6680.69	1744.47	0.26112	52.2965	941162.7521	76.513	3314.38	58	39.0646
3.133	8709.89	2445.19	0.28073	90.4932	1220456.6316	111.43	4239.5	47	36.2998
2.475	5692.01	1414.69	0.24853	63.6363	708999.3503	94.6398	3096.14	18	39.4005
20.057	11910.5	4320.56	0.36275	98.968	1630844.9097	182.238	4270.92	66	31.877
6.011	5812.66	1928.94	0.33185	62.7325	780169.6481	81.7077	3407.97	36	37.8523
17.619	10238.1	3382.9	0.33042	112.295	1430351.2002	136.687	4268.27	106	29.1375
2.324	10280.6	2448.67	0.23818	150.53	1365601.6266	165.333	4667.1	53	30.6866
3.187	14456.8	4533.15	0.31356	179.649	2075637.108	259.391	4917.05	91	27.1316
1.703	3943.18	1041.69	0.26417	32.5753	560006.778	46.543	1786.03	12	41.2001
14.837	10386.6	3452.95	0.33244	130.412	1483446.1289	203.563	4035.72	89	34.1546
1.937	5429.1	1575.46	0.29018	47.458	754171.6218	74.0363	3095.15	16	41.6861
3.816	14087.6	4679.34	0.33216	172.864	1946643.6952	228.888	4883.23	140	28.0985
7.742	22255.9	8615.41	0.3871	182.82	3064213.407	357.718	14641.85	128	27.7218
2.284	4977.23	1347.86	0.2708	46.9127	687762.7987	57.5169	1920.46	17	43.3073
10.372	7728.1	2208.95	0.28583	95.5685	1077887.0464	107.677	3191.12	32	36.4987
12.17	6059.68	1652.34	0.27267	64.1218	838553.9501	86.9748	2844.85	23	40.32
6.848	5416.49	2242.79	0.41406	34.3671	768445.101	74.3528	2591.95	35	43.1413
2.994	8445.43	1620.04	0.19182	98.4914	1193069.9371	116.478	3841.34	49	34.7713
15.781	11960.4	3685.89	0.30817	110.448	1738231.6684	160.139	3750.11	141	35.6808
19.865	16177.4	6951.27	0.42969	210.766	2154017.4742	298.195	5334.03	220	24.3519
1.54	16536.6	5540.56	0.33504	216.958	2298903.3528	258.969	5463.52	287	23.8273
3.249	10012.6	2683.74	0.26803	97.8183	1393340.5196	126.019	4324.71	43	33.2669
5.994	9132.31	2419.91	0.26498	96.0006	1249539.0783	88.9036	4060.7	16	34.1799
2.845	11284.7	3205.86	0.28408	146.398	1591211.6209	156.151	4146.58	134	32.3779
16.227	14045.6	4292.05	0.30557	157.057	1924732.1712	217.908	5221.17	12	30.8532
9.195	7446.5	1744.35	0.23425	76.5403	1014441.585	94.2778	3488.63	47	37.7538
18.534	11097.6	3499.94	0.31537	141.138	1547753.9024	165.523	4133.44	123	32.97
10.807	8133.15	2072.22	0.25478	73.1136	1083767.6475	106.432	3901.59	82	37.0563
4.753	19328.4	5818.17	0.30101	204.363	2697452.9696	317.316	6022.71	237	21.1134
2.295	5778.55	1489.74	0.2578	62.4237	721477.6777	89.5373	3098.6	16	39.3508
1.137	23535.5	5680.47	0.24135	315.901	3226548.619	411.178	6228.15	127	19.8262
14.461	8518.33	2693.42	0.31619	75.0831	1212915.7061	104.406	3425.13	30	35.6342
1.322	10969.7	2645.31	0.24114	117.211	1509869.6745	175.199	3877.36	57	33.3082
1.977	5484.01	1453.23	0.26499	46.5199	765915.5587	71.9107	3106.66	16	40.3177
1.419	5739.11	1336.47	0.23287	51.8119	831641.3985	71.2598	2859.28	59	40.3002
15.932	8453.47	2990.97	0.35381	70.934	1198171.9262	121.584	3221.91	86	38.4492
2.641	7961.79	2148.35	0.26983	66.5126	1060293.474	96.0983	3508.32	22	37.0579
14.15	10955.8	4373.79	0.39922	99.7345	1562991.6866	142.559	3679.3	38	31.7276
5.026	4268.34	1080.62	0.25317	30.2149	595806.9459	49.7492	2069.23	42	44.5321
13.276	5691.17	2110.42	0.37082	65.8625	765181.3411	96.3825	3112.81	39	38.7661
9.669	4567.92	1220.66	0.26722	43.6176	619507.3179	73.0589	2557.9	10	42.3443
8.886	7967.98	1814.78	0.22775	56.9772	1120004.8306	87.5365	3575.67	19	37.8771
11.282	8579.27	2108.28	0.24574	76.9909	1154974.8396	99.3322	3671.56	39	36.4394
3.562	4618.35	856.14	0.18537	45.3572	650759.354	53.7983	2558.56	20	40.7701
9.916	7353.42	2762.39	0.37566	54.9725	1017014.9756	121.966	2736.67	59	39.7414
1.932	14135.8	3787.5	0.26793	180.199	1927214.545	226.591	4623.78	176	28.8721
2.429	11539.5	2805.99	0.24316	156.669	1654993.481	165.25	4770.92	32	29.1981
20.756	12505.6	3210.35	0.25671	108.529	1787958.0688	169.267	3704.7	125	35.9557
1.263	15869.9	3858.01	0.2431	199.354	2234622.9286	269.497	5562.41	82	23.5669
2.135	13580.7	3704.43	0.27277	164.024	1897645.1319	213.588	4981.15	206	28.0365
11.139	4035.46	1208.51	0.29947	34.2434	551732.5599	50.1688	1388.67	32	44.4616
14.795	6727.97	2203.08	0.32745	66.1031	896540.4053	101.856	3259.7	83	39.7102
12.812	6348.93	1471.87	0.23182	57.6883	869584.6361	73.6151	2595.35	23	39.9695
4.073	5768.82	2291.85	0.39728	56.6733	801203.5026	76.4425	2684.6	27	40.7067
13.729	13186	4706.29	0.35691	156.934	1854959.1433	233.425	4647.62	127	29.7105
16.203	13656.7	3413.84	0.24997	138.239	1874890.7514	213.019	3663.47	119	34.3951
17.128	23904.4	6585.35	0.27548	214.824	3358690.898	303.205	6567.95	256	19.5961
4.357	5076.51	1491.55	0.29381	49.7675	722614.919	66.6813	2060.42	2	41.9873
9.254	6778.68	2072.62	0.30575	61.2659	907053.7451	102.872	3647.63	67	39.1159
1.705	9662.31	2389.13	0.24726	105.715	1375365.3244	149.426	3994.22	34	29.2653
2.204	5914.76	1722.51	0.29122	60.3458	741568.7738	96.6734	3127.69	16	38.8733
18.392	13543.7	4444.38	0.32815	139.197	1943472.4083	214.044	5068.35	95	26.7631
1.956	12602.5	3408.32	0.27044	154.972	1798693.172	183.174	4782.51	44	28.3457
16.222	9314.62	3731.49	0.4006	67.552	1309008.1089	132.183	3865.72	52	34.9595
5.095	6536	1050.16	0.16067	62.9196	885333.9203	82.5171	3196.76	55	38.4338
15.993	8803.25	3483.03	0.39565	75.41	1207872.7985	131.252	3829.99	23	35.3965
1.574	6824.04	2360.33	0.34588	60.0889	943920.8643	102.999	3756.66	72	37.6783
1.468	3952.98	1217.87	0.30808	34.3014	539652.4043	48.9034	1408.76	17	44.2712
11.214	3918.11	1152.33	0.2941	35.2801	535633.0192	49.6635	1387.1	32	44.4587
3.003	8802.84	2568.89	0.29182	77.041	1227946.5542	112.392	4260.31	60	34.4086
1.46	9663	3120.19	0.3229	97.8838	1349208.2624	146.993	4256.77	36	34.1099
18.652	10100.9	2770.66	0.27429	98.5638	1408663.7987	131.1	4145.82	82	33.4173
3.607	5111.33	1957.62	0.38299	24.9752	704003.9415	69.6626	3064.82	64	39.8013
4.692	14560	4998.61	0.34331	162.094	2085628.0855	235.889	4617.61	61	28.7521
8.67	9898.42	3763.76	0.38023	90.1029	1403446.5497	146.72	4433.11	54	36.7976
1.835	7671.16	1972.13	0.25708	67.0392	1057812.7638	107.054	3590.27	23	36.7191
14.307	7034.41	2156.5	0.30656	64.42	955257.5535	102.166	3383.56	53	37.8889
2.123	8584.66	2601.47	0.30303	96.4928	1215773.6992	112.321	3605.01	94	36.7163
2.628	16925.4	4201.91	0.24826	207.748	2344273.2525	264.853	5284.5	168	25.1455
19.452	11848.6	4363.1	0.36823	108.408	1664856.4398	164.4	5326.2	91	32.5488
17.56	7432.01	1692.12	0.22767	68.757	1054506.4041	87.5253	2773.3	48	40.247
1.212	8840.63	2507.31	0.28361	89.0498	1250413.3332	133.948	4075.5	167	33.5171
4.821	11785.2	2573.35	0.21835	126.18	1619385.2827	151.194	3899.28	21	34.7056
0.85	9556.86	1847.49	0.19331	105.466	1351287.6652	126.533	4262.27	48	33.1242
16.209	10666.3	3815.81	0.35774	97.3297	1415807.113	154.257	4855.5	47	33.3503
4.945	12591.5	3219.78	0.25571	163.422	1732391.9552	207.866	4531.62	130	27.9192
0.952	10197.5	2043.33	0.20037	101.565	1443271.4757	137.695	4254.31	43	33.6813
15.104	6494.75	1703.54	0.26229	62.538	942739.7363	91.2591	2772.81	82	38.9535
9.527	12610.6	4630.44	0.36718	126.474	1772035.4743	220.961	4755.59	100	28.0628
12.127	8832.94	3720.84	0.42124	78.6125	1203643.8334	137.287	3870.99	24	35.8709
10.962	9019.6	2465.06	0.2733	64.5544	1302923.9102	100.42	2778.68	64	39.446
15.965	9261.34	2946.37	0.31813	108.068	1274398.698	141.056	4073.11	125	33.5798
1.904	13079.9	3387.91	0.25901	143.353	1794572.1677	189.514	4724.45	26	29.4626
1.397	8777.6	2301.88	0.26224	91.7574	1237378.2096	131.054	4072.93	164	32.925
12.809	4959.62	1320.9	0.26633	41.0308	724223.6796	88.9765	1986.71	32	44.0039
2.456	12909.7	3619.69	0.28038	162.012	1794255.7703	221.47	4826.9	198	28.76
9.758	6237.43	1521.78	0.24397	61.9404	866387.6713	75.1184	3770.29	75	38.9633
5.769	3608.7	1319.73	0.3657	25.667	494647.3136	45.4677	1414.1	5	45.292
3.778	9413.03	3913.43	0.41574	84.2917	1301017.2572	143.301	3719.41	132	35.0492
16.434	18351.3	6636.83	0.36165	163.57	2637636.7321	256.006	6237.17	126	23.1365
4.646	5917.03	1426.39	0.24106	54.6862	773503.8488	78.7073	3091.39	31	38.8663
0.875	7010.34	2008.47	0.2865	80.4949	949628.7042	111.257	3043.49	83	39.2278
1.853	12015.8	2403.55	0.20003	149.884	1678854.3623	175.997	4629.62	148	29.5814
13.191	6175.5	2849.54	0.46142	47.5366	833551.5218	97.6827	2706.22	33	39.3895
7.726	13962.9	4989.73	0.35735	165.156	1936459.5683	216.812	4826.67	63	28.3704
13.62	7365.7	1978.62	0.26862	59.0679	1036131.9514	94.2684	2903.87	44	39.3221
13.703	7228.76	2528.79	0.34982	67.0826	1005821.854	107.808	3628.93	50	38.0732
1.478	4082.83	1274.27	0.3121	35.8334	561399.693	51.2133	1398.69	17	44.2865
5.03	7409.21	1411.8	0.19054	55.4284	980732.0199	82.8367	3129.83	53	38.6795
19.855	9723.68	3603.31	0.37057	162.853	1340410.244	241.37	4424.72	164	31.5408
5.96	13197.1	4686.69	0.35513	154.819	1842868.4563	185.217	5142.95	43	27.4319
13.339	6968.24	3150.61	0.45213	81.2383	874468.5724	137.899	2063.91	101	41.6038
2.223	10117.5	3302.58	0.32642	129.05	1353069.4419	171.483	3970.39	43	33.7568
15.015	7026.43	1912.09	0.27212	70.8954	951760.5947	98.5882	3168.23	62	38.3972
10.797	8133	3443.44	0.42339	65.4221	1183572.098	117.073	3445.03	43	37.8797
1.091	6413.8	1369.37	0.2135	54.9664	886798.1056	84.0334	2807.9	17	40.3051
4.307	14205.8	4427.39	0.31166	177.369	1963636.1473	231.956	5169.02	108	28.7983
10.531	4346.08	419.5	0.09652	39.2045	588408.7872	54.4585	2133.77	32	44.036
15.519	9607.88	2931.69	0.30513	52.3938	1307493.0756	134.287	4567.62	26	34.7962
9.216	7482.22	2009.49	0.26856	69.422	1067796.8415	104.692	3766.23	11	36.2425
3.754	8886.95	2633.4	0.29632	92.3703	1195681.1518	140.67	4060.89	42	34.8611
1.339	6608.41	2133.53	0.32285	53.2442	916507.5636	97.1699	3670.23	73	38.415
14.202	10147.6	3623.5	0.35707	81.3454	1388273.8255	130.286	4451.97	29	33.5541
8.176	6249.72	1354.22	0.21668	50.1826	897334.1296	70.7979	2325.04	63	42.4016
1.264	8706.65	2513.26	0.28865	87.7431	1202251.0664	115.651	3183.3	23	37.2337
9.304	4948.97	1417.38	0.28639	45.5408	698719.3413	68.4526	2619.67	49	43.2703
14.794	7214.73	2310.9	0.3203	63.7968	1012568.7179	95.9628	3608.72	54	39.3512
2.832	9922.14	2773.66	0.27954	113.276	1404869.3424	151.886	4234.85	54	33.5392
0.78	6805.32	1786.83	0.26256	73.8736	930684.0362	111.198	3019.92	81	39.2695
2.365	4376.95	747.41	0.17076	39.2546	577148.4164	64.4894	2562.81	11	43.5166
1.499	7264.6	2373.4	0.3267	64.8901	978120.5866	100.026	3113.19	26	40.1807
2.317	9581.64	2365.46	0.24687	103.17	1368505.0223	140.903	3892.78	36	31.103
3.148	4757.42	1301	0.27346	39.398	651297.2689	59.2486	2724	63	39.6782
6.046	8207.32	1885.09	0.22968	73.8488	1148418.0084	91.6635	3269.67	32	37.3668
18.399	11290.3	4127.65	0.36559	84.9629	1511766.9935	177.11	4451.76	32	31.8192
3.04	9041.53	3163.62	0.34989	90.4751	1292122.9066	132.966	3513.08	10	46.5464
16.514	18871.7	4790.44	0.25384	185.619	2617616.0409	222.36	5187.36	68	25.5727
13.03	8565.15	2823.75	0.32967	65.243	1204648.8698	113.459	3342.46	66	34.699
2.508	14063.4	2916.61	0.20739	163.362	1905902.8256	214.123	4851.73	94	27.8716
2.006	4202.05	744.71	0.17722	39.6896	554911.2539	59.5054	2569.43	10	41.5326
9.988	18437	6283.23	0.34079	190.257	2561741.7696	228.215	5083.87	124	27.0284
11.405	5401.22	1655.39	0.30648	48.302	747976.8636	84.193	2345	74	41.7895
2.409	6055.17	2056.89	0.33969	60.1895	851884.1644	85.7223	2693.18	41	40.6434
7.93	5448.52	1686.27	0.30949	55.0525	745541.9365	76.4563	3150.05	12	38.5684
15.229	7606.57	2359.22	0.31015	70.3133	1102020.0578	99.8765	2700.17	65	39.6167
14.674	7229.11	1889.51	0.26137	66.9965	1016196.4794	97.8967	3101.91	69	39.6611
7.983	5181.85	1540.58	0.2973	46.1167	756380.9889	69.4246	2492.75	44	42.1077
8.034	4912.71	1089.17	0.2217	51.26	706987.5942	66.5794	2152.74	59	43.1791
9.241	8272.09	1493.19	0.1805	77.4743	1117316.8145	102.072	3690.3	32	35.4698
2.091	9125.48	1932.35	0.21175	107.102	1242161.0665	135.447	4041.8	41	34.2011
2.807	9017.08	2640.87	0.29287	76.6562	1255612.9813	115.043	4306.55	61	34.3032
1.751	8634.81	2732.57	0.31645	90.8725	1216703.5517	107.116	4094.27	27	35.6903
8.953	7112.89	2639.53	0.37109	54.1795	980235.3735	110.137	3589.31	38	36.1
1.511	13313.5	3463.99	0.26018	155.329	1852923.4813	214.119	4367.6	64	31.1912
5.054	7429.73	1707.82	0.22986	78.4277	1064909.1256	108.955	3961.91	97	35.6374
2.63	8320.57	2384.79	0.28661	85.4037	1176861.8515	122.169	3890.7	37	35.1247
3.943	9145.85	2784.88	0.30449	77.7208	1261224.0083	116.614	3983.27	69	35.6478
14.479	5856.85	1609.76	0.27485	45.3865	840094.319	78.5614	2805.53	48	39.8883
16.636	7583.01	3081.31	0.40634	45.9293	1020094.8358	111.917	3221.58	41	38.2213
9.896	11571.2	4746.63	0.41021	109.563	1565281.0985	167.51	4463.23	62	33.0888
1.312	6560.4	2140.65	0.32629	54.4476	909656.1816	101.59	3600.62	71	32.6749
1.351	14783.6	3695.48	0.24997	191.94	2085686.3399	208.14	5678.98	65	23.1391
1.001	8226.06	1647.95	0.20033	70.787	1176009.7705	111.153	4057.8	101	34.8768
2.904	14685.1	3992.68	0.27188	179.879	2065334.7328	242.823	4520.51	18	29.5084
3.785	10260.3	3166.03	0.30857	90.568	1451921.7016	134.12	4246.39	98	33.3255
1.556	9808.75	3389.05	0.34551	100.201	1362761.1531	150.757	4872.97	37	32.0754
13.356	12950.5	4278	0.33033	128.475	1774485.7571	175.886	4419.85	24	34.412
2.507	17667.1	5468.21	0.30951	268.877	2391216.6601	310.658	5674.07	326	22.097
3.418	10446.1	2931.11	0.28059	117.271	1455801.5397	158.719	4368.31	65	32.9678
4.216	13033.7	3888.34	0.29832	147.368	1781246.9356	194.324	4614.63	43	29.6514
2.064	11336.2	3492.32	0.30806	112.749	1625922.4832	138.393	3909.07	65	34.6502
17.844	10029.5	3326.06	0.33162	96.2723	1352698.9728	139.325	4397.44	48	29.6421
3.13	6335.2	1919.6	0.303	57.3925	880395.7877	81.5724	2621.81	33	41.1847
2.583	11212.8	2777.66	0.24772	127.592	1612457.0748	164.934	4350.48	36	31.4385
13.56	7111.99	1657.14	0.233	67.4296	990478.1056	82.9556	2889.86	17	39.2839
0	8980.64	1680.98	0.18717	84.2585	1240737.4168	107.107	4568.48	28	32.4186
17.031	9513.91	2325.24	0.2444	101.098	1269086.3337	125.238	4144.73	30	34.1725
19.676	22649.1	5155.1	0.2276	185.035	3290765.7212	256.075	5923.27	143	25.4414
1.811	8718.57	2175.85	0.24956	84.5926	1244731.207	114.89	4007.1	6	34.1461
1.546	8491.86	2829.43	0.33319	92.3258	1201540.9391	125.66	3179.9	36	37.6508
14.106	12850.4	5175.63	0.40276	104.406	1800017.3415	193.677	4166.88	57	37.8676
4.435	17269.3	4728.78	0.27382	239.616	2369891.7346	293.284	5292.97	207	21.2863
0.979	22869.8	5440.58	0.23789	323.683	3147677.4371	405.101	6215.8	164	19.8448
3.291	9923.17	2612.15	0.26323	115.308	1409814.6167	145.683	4189.49	47	33.1126
2.729	13219.1	3914.28	0.2961	149.496	1786237.0472	190.724	4825.87	68	30.6133
2.587	9717.13	3321.67	0.34183	108.415	1357239.2857	131.557	3642.45	13	35.3428
11.2	5440.74	1685.51	0.30979	43.7013	762874.7419	70.5372	2810.19	56	42.631
18.004	12833.4	4440.12	0.34598	102.232	1766672.3484	183.625	5689.15	90	26.1461
20.685	14651.5	5027.34	0.34312	164.873	2009085.0537	205.966	4585.99	41	30.9227
12.914	6666.03	1420.97	0.21316	52.145	935272.8327	68.1992	3417.4	19	39.369
4.263	7691.12	2412.01	0.3136	89.8882	1050230.6892	124.748	3232.13	65	38.6871
4.681	17701.4	5692.15	0.32156	246.815	2403035.8631	293.028	5369.83	271	27.7825
3	4018.55	1348.29	0.33551	37.459	544487.7115	50.506	1410.11	14	44.2475
2.186	10635.3	3658.38	0.34398	126.996	1434512.9798	174.449	3942.35	52	34.0397
15.024	6835.64	2597.78	0.38003	85.0407	854847.487	157.298	3502.37	56	37.1297
1.777	10826.6	2660.29	0.24571	151.029	1532815.4712	163.273	4647.61	25	23.2898
20.148	10938.7	4759.17	0.43507	113.388	1470004.7008	207.898	4437.93	99	31.0141
18.25	20439.4	6102.12	0.29854	182.611	2946945.24	280.782	6298.83	232	22.2217
2.997	5280.59	1486.58	0.28151	50.5324	739854.5006	63.9348	2335.46	15	42.4653
2.494	19763.7	6337.84	0.32068	254.239	2688066.3712	321.635	5858.57	340	20.7747
19.736	11280.8	4488.23	0.39786	79.8575	1536346.3695	175.721	4524.85	93	31.8705
15.747	9470.42	3105.09	0.32787	108.163	1313176.4748	158.542	3972.14	86	33.0337
7.191	4832.91	1105.91	0.22882	45.1244	643321.7847	68.2999	2709.03	11	42.7736
17.69	8443.45	2508.73	0.29712	75.431	1170595.531	118.473	3297.86	45	36.884
20.103	10529.6	4451.91	0.42279	58.7131	1349721.6168	177.339	4619.74	77	33.5839
0.58	10742.2	2635.62	0.24535	125.441	1492830.9926	167.088	4701.52	172	28.7641
14.724	6774.61	1816.5	0.26813	58.7688	886840.717	91.2123	3097.29	47	39.14
2.874	8636.45	2410.48	0.2791	83.4464	1240462.0606	118.516	3980.91	42	35.187
18.148	14344.8	5586.78	0.38946	111.573	1961368.4058	228.452	4770.49	96	28.92
20.114	9331.93	3025.87	0.32424	75.6946	1270747.1458	127.99	4045.2	68	29.3951
3.178	9896.16	3558.88	0.35962	89.3136	1411319.3114	142.59	3677.39	10	34.815
1.574	10707.3	3736.51	0.34896	99.3592	1486029.3619	160.445	5916.45	46	33.7072
1.187	8212.95	1835.84	0.22352	100.371	1118714.38	118.736	3431.89	10	35.7936
4.924	7945.77	2065.57	0.25995	72.8337	1111349.6273	102.056	4083.45	15	34.274
12.165	4489.85	1236.43	0.27538	38.5931	621414.5537	56.4443	2455.68	56	42.9532
4.263	14388.5	6113.79	0.4249	193.235	1904306.4438	278.575	5505.6	197	27.1973
5.603	9933.9	3502.49	0.35257	88.523	1410788.0285	135.931	3733	65	34.546
0.484	8063.92	1959.61	0.243	101.498	1120947.4548	119.491	3223.97	4	37.1083
2.777	12559.4	4730.59	0.37665	109.31	1782823.4881	190.602	4239.78	68	32.2656
15.442	8045.98	2264.34	0.28142	65.2162	1113393.1164	98.5784	3471.15	50	36.9116
2.64	12540	3898.37	0.31087	179.077	1673197.0325	232.079	4895.48	186	28.0782
3.748	20357.1	6348.05	0.31183	252.784	2823405.2491	324.409	5554.25	106	23.352
9.741	8176.49	3307.89	0.40456	81.7761	1083623.2823	127.93	3738.05	50	35.4406
2.045	8535.59	2531.23	0.29655	92.1925	1202482.8895	116.682	3572.88	99	36.9993
2.963	9563.48	3241.59	0.33895	89.3633	1361674.0668	136.41	3575.53	11	35.4004
0	8396.52	1872.11	0.22296	76.7535	1185871.4429	110.678	3995.53	7	34.6094
18.352	13030.9	4592.21	0.3524	142.63	1798078.7409	227.448	4126.5	99	31.5512
20.003	15139.1	5322.85	0.35159	114.24	2182098.9257	214.876	5337.93	139	32.3552
12.979	7591.42	2766.33	0.3644	58.9849	1086152.6493	102.186	2845.02	68	40.4608
12.994	4172.64	1771.49	0.42454	43.2281	575017.4095	73.7737	2325.26	39	42.9021
1.898	5642.61	1353.89	0.23994	50.5733	818092.128	75.347	2864.96	56	40.2816
0.553	9225.65	2376.4	0.25758	108.324	1297303.223	158.996	3826.99	11	34.1032
2.047	9332.25	2598.07	0.27839	82.3486	1266702.5778	128.529	3874.82	24	35.0089
1.548	7490.77	1791.98	0.23922	84.4863	1040514.0329	106.137	3838.71	24	36.1715
16.599	9638.59	3150.07	0.32681	65.027	1325432.6631	134.775	4051.59	34	38.881
12.089	8022.92	2311.34	0.28809	63.7573	1113369.0344	100.528	3550.64	45	36.6809
1.801	8135.26	2361.04	0.29022	92.4233	1108056.082	119.917	3224.01	82	38.7058
17.829	11613.7	4472.35	0.38509	65.4862	1502508.3845	187.295	4116.12	77	34.2995
1.02	8672.74	3053.6	0.35209	84.3316	1161829.163	137.33	3559.4	50	35.9657
1.67	8399.72	2476.24	0.2948	92.2847	1146798.1692	122.685	3242.24	84	38.6197
1.1	9368.04	1893.21	0.20209	103.113	1323340.0573	132.266	4173.42	49	34.0532
2.769	7236.3	2439.31	0.33709	63.2004	949559.3153	121.446	2857.42	27	38.7794
2.225	6039.2	1005.27	0.16645	51.1064	839306.7589	66.5637	2977.77	22	40.2069
15.651	8720.85	2979.16	0.34161	65.741	1206635.2165	113.874	3367.37	32	39.5833
20.061	13799.5	4058.47	0.2941	148.033	1889748.631	207.323	3900.34	128	32.6903
2.036	12023.9	3242.4	0.26966	126.196	1654981.9484	170.169	4566.32	83	30.9115
2.887	9289.33	2940.67	0.31656	100.737	1285995.0647	130.084	3611.66	20	35.3066
13.6	6234.36	1642.86	0.26351	54.0029	885162.9586	84.0334	3015.42	40	39.3597
1.761	5726.46	1940.14	0.3388	68.4294	779809.6763	85.3641	3015.37	35	40.281
8.722	5431.19	1254.17	0.23091	72.1605	728073.2771	108.358	3178.45	51	39.2881
1.777	10699.8	3313.11	0.30964	130.184	1431892.0007	166.314	4104.4	37	34.0902
11.25	4017.68	1193.27	0.297	35.7434	549712.9913	50.6113	1377.23	32	44.4563
1.354	6709.61	1607.12	0.23952	70.2739	889814.8635	94.7046	3468.43	82	37.7936
3.481	6353.9	2001.61	0.31502	54.3819	838320.2494	102.544	3866.8	22	40.569
15.961	9064.29	2719.1	0.29997	94.1925	1217504.7542	127.573	3998.8	44	33.9938
9.069	6914.25	2119.79	0.30658	60.691	950958.7518	98.3783	3598.22	61	35.7457
14.042	6274.54	2578.64	0.41096	62.1599	822583.2053	120.465	2792.23	5	38.8517
12.281	8836.65	2885.77	0.32656	73.7089	1260740.3282	109.423	3423.99	44	34.2328
3.15	11196.3	3469.4	0.30987	127.498	1586015.2615	180.209	4448.41	40	31.3179
1.736	7658.23	2285.05	0.29837	76.4834	1059973.6836	95.4989	3729.23	35	36.3622
2.889	8549.77	2043.45	0.239	103.841	1200855.2607	119.17	3810.23	52	35.1555
16.532	8588.45	2738.3	0.31883	57.0891	1172521.6661	114.599	3989.71	45	35.9139
10.427	7326.68	1969.55	0.26881	61.3777	1037926.8975	83.3064	2422.6	85	40.474
1.55	7658.27	1799.31	0.23494	87.1968	1067770.0941	100.127	3842.1	23	36.1839
14.853	5853.98	1087.27	0.18573	50.5835	807671.5022	72.0055	2829.49	43	40.7246
1.676	8496.72	1716.84	0.20205	75.7389	1217727.6027	106.708	3818.55	14	35.3602
1.462	8947.77	2335.14	0.26097	96.3634	1258164.2996	128.906	4132.18	168	32.7739
1.172	9351.32	1436.5	0.15361	99.7484	1325905.7209	122.888	3950.09	45	34.9844
13.227	7357.55	2056.81	0.27955	58.3958	1055789.8185	88.3426	2571.92	29	40.1112
3.504	10691.5	2788.63	0.26082	97.2135	1512813.8783	137.366	3911.76	121	34.3168
2.313	15259.3	4712.26	0.30881	185.498	2038388.0359	262.15	5052.12	195	26.4711
16.926	7079.02	3807.73	0.53788	63.9865	952142.5907	117.32	4142.59	49	34.8536
4.967	9622.77	2890.46	0.30037	43.231	1345111.2919	104.891	4112.47	100	32.6743
15.139	13799.6	4687.3	0.33966	175.829	1959073.7376	244.406	5137.84	66	25.5359
19.344	4754.78	1931.48	0.40621	32.7632	661142.9276	72.3113	1184.83	49	44.775
1.952	6720.24	1547.54	0.23028	75.7389	885835.4041	90.183	3430.78	85	37.7361
16.999	11123.2	4306.36	0.38715	100.684	1559368.281	172.136	4273.07	65	36.0781
1.806	9739.64	2829.89	0.29055	108.47	1317133.0517	154.059	4093.75	47	33.6065
2.277	4538.01	892.85	0.19674	44.3992	618068.7854	68.1386	2581.25	12	43.0013
14.122	8042.26	3015.19	0.37491	54.7923	1152509.1156	109.229	3733.92	29	34.8394
15.308	8969.48	2765.56	0.30833	56.2736	1282412.9347	102.271	3951.85	60	38.1764
14.737	6860.49	1881.22	0.27421	66.4955	977266.2564	103.947	2878.16	33	39.267
18.334	9247.34	2661.21	0.28778	56.1217	1307357.4038	97.9506	4539.87	61	39.0957
2.883	16705.4	4373.69	0.26181	234.091	2369623.6443	265.904	5514.82	90	22.4418
5.886	5358.7	2126.45	0.39682	47.434	788274.2881	69.3869	2662.37	37	42.3161
4.111	8474.67	2704.51	0.31912	83.5966	1211672.8567	130.31	3524.76	28	37.0637
13.137	6217.64	1931.4	0.31063	54.1376	853767.8225	84.1874	2440.31	44	40.7603
5.856	15251.8	4423	0.28999	179.385	2127835.5211	220.381	5806.78	81	23.8654
2.07	11183.4	2857.35	0.25549	136.373	1546043.2878	160.063	4483.75	94	31.2457
15.537	9693.87	4506.17	0.46484	108.265	1403489.6001	176.829	4170.78	94	32.6929
16.481	11399.8	4252.17	0.373	103.473	1542835.7201	184.752	4022.64	73	34.7124
3.854	14311.2	4793.24	0.33492	154.263	2011317.6303	238.891	4663.83	73	26.0608
14.932	6552.16	1787.24	0.27277	60.9096	909876.0796	92.3011	2212.93	90	41.1098
4.288	7678.71	2996.59	0.39024	64.6707	1093979.348	102.872	4098.15	52	37.2043
2.044	11124.4	2200.93	0.19784	120.036	1505045.5214	153.447	3709.74	14	34.4691
12.308	6988.51	2948.86	0.42195	51.0705	964947.9713	125.128	2860.91	63	39.2599
2.131	5125.46	1356.91	0.26473	47.1759	712014.4756	61.2881	1978.6	14	43.4934
17.407	7196.44	2873.79	0.39933	66.8182	993553.138	93.615	3529.42	75	36.6233
2.262	8850.22	1975.68	0.22323	80.6509	1246218.4214	104.741	4707.84	27	33.1204
4.257	14217.9	4425.13	0.31123	99.8312	1959074.0757	213.303	8847.21	31	35.9257
9.978	7115.35	2137.83	0.30045	68.909	1003582.4387	96.7803	2882.88	32	39.5488
17.374	11860.3	4393	0.37039	120.966	1651349.7115	194.177	4476.16	112	46.5464
10.771	8702.91	2767.28	0.31797	77.1324	1167931.2622	120.786	3595.88	53	36.282
3.624	9630.33	3008.57	0.3124	94.069	1336131.4232	141.235	3506.99	27	36.0385
1.484	5776.26	951.34	0.16469	51.5882	816282.477	71.3577	2663.35	1	42.2454
14.29	7793.93	2560.45	0.32851	66.4502	1096374.3737	116.269	3099.34	59	35.4117
4.23	4405.99	1227.84	0.27867	36.864	618478.418	45.8457	2043.42	11	44.1846
13.807	6954.55	2132.77	0.30667	57.1288	966581.6172	105.51	3035.59	55	39.1762
3.943	6520.13	1345.98	0.20643	48.9001	940870.6881	72.1401	2418.3	73	42.0832
2.683	5104.8	1639.39	0.32114	50.0204	719759.4614	64.3347	2202.06	38	43.2267
10.848	15912.6	6480.62	0.40726	183.892	2206586.8461	294.883	4616.99	75	28.4107
18.239	8418.29	2894.32	0.34381	67.8071	1179570.5159	115.096	3780.02	19	38.3434
17.869	11452.5	3907.57	0.34119	97.4586	1572778.5393	155.657	3513.47	59	34.2134
0.895	6108.91	805.4	0.13184	48.1485	867263.5242	68.9671	2727.14	2	42.3765
4.744	7643.27	3189.07	0.41723	81.1409	1077959.9945	115.353	3218.76	39	38.0736
11.321	10109.1	4202.12	0.41567	93.052	1421603.8714	150.418	3756.68	77	34.6825
1.864	10202.1	2653.28	0.26007	91.5636	1453171.1018	137.402	3649.18	122	35.5868
1.797	12027.4	3264.93	0.27145	144.794	1710383.1757	174.24	4716.27	28	28.988
9.783	6531.39	1631.48	0.24979	56.7905	934161.2913	75.1461	3054.79	41	34.8175
20.3	19268.5	7348.16	0.38135	126.985	2748202.5157	286.186	10418.67	93	29.3758
13.393	5656.26	869.84	0.15378	69.686	793589.131	72.3516	2948.51	64	40.8501
3.005	8631.68	2607.83	0.30212	83.9794	1238413.9277	118.381	3979.72	39	34.9384
19.503	10297.2	3592.38	0.34886	96.6606	1392916.9068	162.307	3578.68	109	34.1065
10.031	6761.83	2591.74	0.38328	55.4657	934669.9149	100.811	3253.29	13	37.8784
1.889	7334.07	2044.6	0.27878	71.6123	984218.0315	109.312	3612.2	79	36.9085
7.466	16040.8	4709.41	0.29358	190.652	2194531.0761	266.622	5448.1	95	23.9761
1.35	15019.1	4632.49	0.30843	210.099	2090486.2517	254.281	5339.97	282	24.6828
15.241	7619.01	2615.89	0.34333	64.6872	1077706.3168	101.282	3757.49	61	35.1864
2.856	16353.4	4567.51	0.2793	202.094	2249940.7569	276.794	5174.2	162	25.8751
3.897	5825.73	1002.34	0.17205	52.516	802861.8042	60.3561	3036.33	24	39.7704
1.547	11184.2	3143.12	0.28103	123.633	1562343.5493	178.491	4198.34	67	32.9117
6.471	19284.3	5450.86	0.28265	247.94	2686447.1502	306.552	5452.12	228	27.1908
15.102	18197.1	7496.7	0.41197	157.265	2552698.3672	275.48	5349.63	108	25.4521
17.039	8826.91	2839.11	0.32164	110.391	1182798.3809	154.406	4434.45	91	33.6924
17.368	7318.25	3309.39	0.45221	65.4976	1044550.7558	104.478	2560.82	81	39.396
17.546	7823.82	2199.59	0.28114	64.5091	1132078.2196	91.6763	3235.23	50	40.5276
18.151	13347.8	4692.36	0.35154	151.742	1905355.725	238.395	4916.96	145	26.6722
14.311	6416.29	1542.37	0.24038	59.8776	914459.4052	77.9701	3219.01	35	40.0769
2.285	5833.08	1458.78	0.25008	44.1484	826551.8325	63.1354	2454.92	10	41.7341
16.854	8082.27	2990.13	0.36996	71.949	1153988.208	105.811	3392.65	31	38.7616
1.272	15298.5	3888.78	0.25419	181.118	2160859.0335	216.514	5696.31	66	22.9984
13.158	6387.3	1750.95	0.27412	56.229	902994.7176	79.6831	2502.86	74	42.1306
2.861	13568	4629.42	0.3412	162.897	1864656.886	206.608	4980.96	76	27.7415
2.097	6739.31	2343.56	0.34774	81.1136	928990.4906	93.8308	3252.7	62	38.5563
3.007	10700	3303.99	0.30878	133.723	1416130.0965	165.83	4136.06	39	33.888
8.58	4457.13	827.96	0.18576	40.3316	611249.2766	51.5309	2308.16	42	41.8828
4.071	10121.5	3261.51	0.32223	94.7792	1446116.411	139.082	4129.78	106	31.7817
2.536	6326	1793.97	0.28358	68.1745	907943.9029	81.5064	3076.6	14	38.0325
5.047	12664.7	3850.37	0.30402	142.444	1704121.215	187.58	4697.77	66	30.79
1.927	10721.9	3452.16	0.32197	128.541	1420548.7271	162.711	4098.37	45	33.5675
1.011	11332.5	2810.08	0.24796	129.955	1571773.9982	174.739	4683.4	176	28.7689
3.145	14077.7	4176.45	0.29667	203.933	1858199.0223	238.591	5594.82	255	23.7643
6.978	16363.1	5902.28	0.3607	183.523	2340365.9552	242.717	4935.81	58	26.4303
4.809	8435.24	2621.4	0.31076	94.8323	1147792.2162	136.658	3957.1	40	35.7148
13.667	6515.06	2816.22	0.43226	54.7587	908506.2632	97.3316	2717.9	42	40.7375
2.392	10007.8	2834.32	0.28321	122.933	1372181.1082	139.637	4201.05	131	32.8763
7.135	5646.53	1573.15	0.2786	53.6018	793315.6272	72.5804	2577.91	41	41.0569
0.545	9140.75	2290.38	0.25056	116.212	1285359.9031	154.81	3830.63	14	34.1387
7.182	6220.78	1585.1	0.2548	58.1011	876530.5139	74.7423	2497.78	63	41.6297
2.262	9875.44	2253.25	0.22816	126.418	1414851.0324	140.817	4351.77	40	32.3072
6.839	5739.99	1840.89	0.32071	40.4083	791016.4988	78.2818	2899.18	55	42.2487
1.11	5960.7	1251.77	0.21	56.9926	827432.4071	77.8647	2692.3	17	40.7155
18.555	13105.9	6130.76	0.46778	94.2418	1883661.0066	194.798	4920.1	53	34.2366
9.251	7465.01	1750.1	0.23444	76.6833	1017241.8274	94.6043	3487.44	47	36.6121
3.608	7578.26	2025.16	0.26723	68.7418	1021965.1342	103.896	3476.32	75	37.3098
7.716	5276.78	1066.58	0.20212	56.9667	749890.4735	69.8002	2341.11	71	42.6887
15.418	12070.6	4103.66	0.33997	103.591	1681855.9306	160.85	5839.56	21	38.2769
7.602	9038.09	2641.23	0.29223	64.0498	1250031.8537	122.709	4269.54	32	39.5133
14.228	5157.44	1203.05	0.23326	42.308	697393.6182	81.2012	2642.36	18	39.9338
12.145	7293.21	2151.1	0.29494	71.7369	981164.9072	104.371	3235.84	37	38.5714
4.361	13033.4	4490.32	0.34452	156.323	1813992.0195	168.64	5200.78	41	27.6078
12.226	5314.97	2048.73	0.38546	44.6088	759596.4211	86.0219	2375.17	89	41.7938
9.694	8141.89	2585.75	0.31758	93.0854	1137495.0714	111.618	3089.98	29	35.8464
3.066	12511.2	4461.6	0.3566	134.773	1739503.6936	198.325	4485.27	95	30.7489
12.484	21182.6	8976.1	0.42374	191.78	2932049.7619	416.428	12303.66	137	25.6844
2.382	12697.7	3687.6	0.29041	161.695	1765541.8702	203.207	4725.41	96	29.0862
9	15839.7	6205.22	0.39175	188.597	2109788.7058	270.498	5346.34	94	22.5388
2.562	11852.6	3783.72	0.31923	136.694	1627181.4989	181.119	4269.44	74	32.0889
4.988	7707.34	2430.5	0.31534	69.4935	1082360.9686	99.8456	3367.66	43	35.3932
3.713	5487.48	1910.51	0.34815	56.6266	759260.033	69.4206	2659.93	40	41.0447
3.719	5656.21	1752.2	0.30978	58.4543	748924.8019	86.3051	2638.39	27	41.2704
2.249	9441.23	2899.46	0.3071	90.3632	1336556.0603	134.985	3898.62	5	35.1433
2.93	9541.59	2650.72	0.2778	114.015	1364551.4725	140.984	3608.72	65	36.4515
14.608	9807.36	2707.07	0.27602	56.1197	1371750.6275	126.009	3733.92	43	35.6182
1.01	11581.1	2581.36	0.22289	155.522	1644011.3353	174.55	4587.03	53	30.0945
2.445	9710.73	2591.3	0.26684	100.373	1349463.9004	135.421	4361.38	39	33.1006
18.6	6256.98	2025.17	0.32366	49.6556	832817.2736	88.0101	2926.6	45	40.3194
19.184	23144.1	7326.59	0.31656	179.827	3246059.0686	306.583	6367.09	209	24.4186
2.485	16419.3	6224.62	0.3791	188.736	2287090.4717	259.082	4577.45	99	25.4557
13.886	11604	4168.14	0.35919	82.6117	1638433.0819	175.103	5976.27	126	32.078
14.252	8404.78	2296.59	0.27324	91.4701	1169453.1251	109.695	3313.87	59	37.6861
15.181	5483.26	1659.37	0.30262	36.0143	733968.5004	71.5323	2120.02	18	41.6319
7.428	4957.39	1341.8	0.27066	44.6187	720842.6916	61.0485	2482.17	39	42.7634
11.896	6701.17	1443.72	0.21544	66.6952	917699.7001	87.6184	3236.64	20	38.7631
7.843	8049.28	1214.91	0.15093	72.7682	1080113.722	94.2734	3777.7	21	36.213
1.938	6349.78	1338.1	0.21073	70.9563	843436.9928	91.026	3393.23	71	38.0076
1.402	15010.3	4640.89	0.30918	145.955	2136126.3986	218.351	8426.22	94	29.2748
5.831	8264.88	2278.35	0.27566	86.5523	1162664.7344	114.883	3930.74	89	33.3575
2.324	10751.5	2619.51	0.24364	126.943	1449760.5511	163.203	4107.66	83	32.1698
2.263	8305.45	2093.05	0.252	81.2724	1179825.192	103.154	3945.32	37	35.522
3.371	16561	5136.7	0.31016	192.197	2217008.2702	262.939	5395.87	186	24.6107
20.354	10402.6	4690.69	0.45091	63.4645	1467415.332	163.219	3985.98	73	35.0165
15.687	8110.48	2823.03	0.34807	70.1966	1121932.5378	111.186	3425.99	55	37.5776
5.073	16768.4	5073.99	0.30259	254.574	2282361.9576	270.378	4890.76	287	26.986
11.769	6312.84	2510.44	0.39767	59.0308	876966.6172	103.787	2387.24	55	40.0941
11.066	7582.92	2465.7	0.32516	61.0791	957441.6808	106.288	3197.22	47	39.4562
1.16	15193	3818.12	0.2513	185.126	2146284.1354	216.249	5702.45	145	23.0276
2.709	13012.5	3022.81	0.2323	174.158	1823021.5095	202.051	5002.96	193	27.9212
17.616	9936.78	3952.48	0.39776	95.7063	1403265.3265	147.27	3629.73	91	35.9874
2.919	8461.82	2100.37	0.24821	87.7084	1135403.1575	126.305	4085.3	33	35.1327
17.638	8227.98	2740.78	0.3331	90.8245	1123316.1374	148.198	3866.07	86	35.2046
8.468	5959.4	1343.74	0.22548	65.3833	834780.3558	72.5835	2772.81	74	39.639
14.652	9640.75	2941.43	0.3051	71.494	1335338.5778	123.529	3860.62	43	36.9075
1.95	8338.13	1979.44	0.23739	99.0214	1158165.0928	130.921	3537.69	34	34.8074
20.03	11592.6	3560.53	0.30713	59.8049	1604047.6567	157.844	4370.22	92	31.4948
15.412	8303.85	3099.94	0.37331	77.5138	1208330.3789	110.102	3216.59	77	37.4903
1.55	9528.23	2048.08	0.21494	101.376	1323914.1181	136.092	3707.15	27	33.7825
2.048	3761.75	974.85	0.25914	35.4169	534586.3712	42.7349	1774.02	12	44.5354
3.451	19862.4	5902.76	0.29718	247.172	2751628.0469	324.728	5530.39	85	23.3149
4.105	13460.7	4125.19	0.30646	136.126	1862245.6974	184.134	4523.59	71	29.6285
3.697	7886.96	2209.92	0.28019	91.1877	1081331.681	127.446	3813.4	31	36.5124
3.583	5432.85	1358.25	0.25	47.4066	685356.6984	75.7053	2321.77	32	42.7171
3.388	17375.4	6593.3	0.37946	187.488	2447805.8914	285.177	5607.57	157	23.3658
2.265	9385.26	2970.34	0.31648	85.3465	1325226.7922	139.534	3858.19	3	35.1007
2.558	16543.2	5087.2	0.30751	203.553	2178726.6709	270.277	6559.64	244	21.8752
14.575	7255.2	3220.48	0.44388	52.268	1018098.6762	114.526	2859.79	38	39.6328
6.79	6473.75	2709	0.41845	50.7735	903902.3876	91.2866	2384.85	6	42.4241
13.077	8417.4	1624.2	0.19295	63.3754	1194138.9624	87.3962	3028.27	38	38.9171
4.981	7110.2	1405.98	0.19774	68.2775	967868.5982	96.3984	3400.75	41	37.7263
2.119	5186.78	1119.07	0.21575	52.1829	677577.5873	79.1023	3289.51	29	40.661
8.202	8429.95	2979.24	0.35341	82.1311	1134258.6663	110.819	3862.37	67	35.0969
0.708	10844.3	2760.2	0.25453	139.007	1511193.2117	165.488	4718.73	172	28.5358
20.109	11431	4496.33	0.39334	83.3742	1580305.3081	183.874	9693.79	58	35.6751
2.232	10170.4	2942.75	0.28934	119.416	1397836.7997	149.8	4192.49	126	32.7852
4.955	6080.24	1710.81	0.28137	51.5345	848850.8338	77.22	3279.05	50	39.2999
20.239	16552.6	7244.54	0.43766	126.786	2237311.3791	283.447	5138.97	114	26.92
0.472	8467.88	2121.94	0.25058	92.7173	1182526.4151	124.631	3232.54	4	36.9507
10.824	5612.36	1631.24	0.29065	53.9757	743810.6197	78.3977	3634.15	27	40.1765
2.618	9049	3299.47	0.36462	98.3779	1201280.7014	125.932	3259.91	71	38.4956
2.298	14667.2	5194.97	0.35418	189.739	2009243.7969	261.025	4641.24	46	28.965
16.769	9908.06	4167.55	0.42062	90.0778	1396593.1022	153.508	3379.96	45	36.5174
1.229	8646.61	2118.56	0.24501	85.6835	1213906.3555	124.75	4056.2	170	33.5005
4.543	9178.11	2579.92	0.28109	56.1051	1263111.8944	128.988	3967.03	25	33.8993
2.87	9140.61	3330.34	0.36434	95.3502	1228405.1702	128.014	3420.03	71	37.7479
3.583	15554.1	4602.24	0.29588	134.109	2191062.8451	215.356	5627.74	73	30.546
19.346	15393.1	3903.56	0.25359	156.022	2171017.3029	177.346	5201.42	26	26.9924
13.684	6659.17	2644.99	0.39719	63.0637	864868.2206	107.259	3033.79	55	39.2781
2.605	18502.2	5760.33	0.31133	257.456	2533382.8887	318.05	5734.54	328	21.1574
2.519	22164.4	7614.83	0.34356	182.68	3147776.4575	362.872	17147.08	89	23.018
1.866	6956.94	1924.15	0.27657	62.7816	973042.7579	95.1835	3580.29	35	37.9278
7.612	15349.6	4848.47	0.31586	183.886	2120039.4046	263.583	5195.96	98	25.6989
15.918	8999.49	3317.16	0.36859	77.6722	1230450.2637	121.133	3522.35	15	37.6168
2.558	9211.97	2877.44	0.31235	106.619	1280889.2037	129.175	3885.18	32	33.9044
4.06	7767.83	2061.33	0.26536	68.2612	1071484.2776	100.987	3347.9	30	36.9898
2.287	11329.3	3987.39	0.35195	131.272	1516779.8816	173.172	4208.48	60	34.0585
3.714	5884.7	1146.06	0.19475	59.1233	807018.8543	70.9765	2703.11	25	40.4416
8.249	8534.16	2590.05	0.30349	75.0951	1193836.3146	119.124	4068.1	22	33.5756
4.833	12037.2	3178.38	0.26404	138.319	1723326.5587	159.134	4633.75	63	29.9053
4.911	20418.4	5889.62	0.28844	250.732	2787727.6059	311.475	5586.9	207	23.7267
17.054	5474.83	1627.44	0.29725	56.9764	713744.4064	106.777	2722.62	64	40.0618
3.976	7948.69	1652.04	0.20783	80.4701	1107096.9257	87.051	3900.86	59	37.3862
20.406	18327	6913.82	0.37724	190.76	2529972.875	295.545	6043.05	190	26.4597
16.889	10854.7	3118.15	0.28726	122.359	1561541.9174	172.03	3458.62	140	37.2447
17.357	15380.1	6297.97	0.40948	184.589	2113059.2791	273.942	5310.46	195	28.2354
2.075	12585.9	2405.05	0.19109	145.505	1775244.8705	174.689	4670.97	133	29.8721
2.343	15454.7	3511.66	0.22722	200.946	2149631.1186	239.811	5038.82	124	24.0375
1.944	5766.76	1942.85	0.3369	46.7388	811283.4194	80.9773	2500.6	26	41.7333
6.321	13750.1	4112.24	0.29906	118.789	1872059.2878	232.553	4271.01	93	29.908
17.677	16377.6	5987.35	0.36558	191.131	2255406.2416	258.312	4848.39	159	28.1317
3.131	13300.6	3977.89	0.29907	137.741	1853711.6304	177.32	4265.41	45	31.6966
14.639	7299.66	3435.72	0.47066	62.5497	1025019.8088	122.616	3072.93	61	39.6537
3.45	11887.8	3345.8	0.28144	135.928	1671310.2117	192.164	4598.73	64	30.204
0.647	4731.83	911.99	0.19273	46.175	678569.0755	54.2881	2189.58	80	42.8774
5.419	21695.9	8121.09	0.37431	163.686	3002619.295	309.469	5792.48	116	25.417
16.553	10243	4134.2	0.40361	81.5851	1391340.2527	164.394	3952.29	107	34.2962
1.726	10122.5	2725.19	0.26922	120.083	1388835.4618	169.276	4608.71	70	30.2096
5.954	5634.29	2142.44	0.38025	64.9323	735713.3376	94.1579	2716.28	34	40.7467
4.891	13681.1	4211.59	0.30784	169.101	1886418.691	223.176	4798.46	114	28.3897
13.028	5482.28	1870.73	0.34123	39.9743	745897.5078	77.2637	1970.21	13	42.4244
2.11	13754.3	3921.03	0.28507	148.07	1873165.4811	204.575	4594.74	41	29.755
3.565	7851.18	2245.57	0.28601	68.6807	1056367.9195	99.2211	3149.13	21	38.2104
12.467	7342.65	1634.33	0.22258	62.9719	980616.9203	78.6606	3490.77	25	36.9759
1.151	7368.94	2158.23	0.29288	78.0919	995213.4036	115.96	3092.37	77	39.0633
11.236	7384.59	1103.68	0.14945	65.5098	1084499.582	76.8895	2431.98	43	41.2051
17.871	8204.05	2848.86	0.34725	62.9145	1094435.8945	116.241	3320.09	45	36.5628
2.193	16308.4	4983.15	0.30555	210.578	2147067.2372	251.782	5962.06	252	21.2835
0.985	8322.55	2374.71	0.28533	101.844	1154011.2242	138.444	3179.89	5	37.3163
19.202	7951.77	3206.57	0.40325	60.6916	1061594.5596	129.413	3433.63	65	38.4098
5.769	6426.81	2198.25	0.34204	54.7308	885673.685	92.6301	3159.89	9	39.6635
11.524	15587	5503.49	0.35308	168.062	2159779.9436	253.951	5158.21	122	28.6286
2.833	15177.1	3465.02	0.2283	213.47	2086117.5408	240.638	5105.4	159	25.4112
15.897	9401.77	3691.54	0.39264	78.6343	1299563.3492	130.021	3555	23	36.9396
2.973	17462.9	5423.66	0.31058	205.583	2297925.3606	267.504	6261.04	253	21.9718
13.297	6771.87	2641.23	0.39002	77.0112	962859.5899	111.226	2930.32	153	36.5597
4.353	10146.4	2743.38	0.27037	97.1487	1432729.7936	120.225	4149.5	103	33.3428
3.091	11021.1	2927.33	0.26561	128.51	1571307.37	170.061	4415.67	51	32.3374
10.954	8349.53	2835.11	0.33955	66.7742	1165816.8075	163.847	4252.47	188	33.7672
10.687	4781.23	1346.14	0.28154	43.6269	659520.0122	72.9955	2800.88	31	41.7078
6.846	6888.81	2125.03	0.30847	52.0698	970073.5828	80.8024	3202.11	57	36.8256
14.629	8505.66	1607.82	0.18902	63.9022	1191761.5244	97.5903	3328.78	54	37.8168
2.562	3794.78	939.79	0.24765	32.4213	535229.9712	46.3792	1740.1	11	44.4482
9.408	5212.66	1187.25	0.22776	41.9342	728310.0294	67.23	2702.04	26	41.2183
1.377	3907.29	1180.13	0.30203	33.7844	535171.9516	49.0647	1394.75	17	44.3148
15.403	8804.56	3405.94	0.38683	80.7863	1206996.3007	118.932	3952.24	38	35.3119
13.542	8782.18	2851.47	0.32468	56.7188	1154049.3276	129.748	4140.08	40	41.6824
1.73	4000.26	1087.13	0.27176	33.732	569494.3892	46.039	1773.46	12	44.4875
13.858	7112.53	1836.59	0.25821	59.3027	1020780.7176	91.4044	2768.8	57	38.1572
0.545	11875.2	2206.79	0.18583	153.925	1614004.0357	192.691	4922.92	141	30.0154
4.247	12162.1	4093.52	0.33658	145.506	1698186.4334	172.114	5105.18	36	27.3166
14.573	10900.1	3163.52	0.29022	97.686	1484882.286	138.654	6291.35	37	30.3835
4.649	7731.63	2352.12	0.30422	71.1955	1076540.8033	102.124	3176.19	38	37.2213
17.298	8005.01	2212.72	0.27641	68.133	1141755.3419	97.4371	2972.64	37	39.1094
3.799	12140.1	3674.36	0.30266	167.098	1713117.7842	208.464	4843.43	70	28.2131
9.511	8977.07	2539.92	0.28293	73.2042	1265352.3854	121.11	4154.85	19	33.7762
0	11954.3	3301.06	0.27613	115.286	1670648.7125	162.583	5588.31	47	26.6845
13.367	8369.15	2592.21	0.30973	64.6674	1180820.4241	102.395	2794.74	58	39.7038
3.665	12485.4	4686.63	0.37536	145.633	1683532.4121	241.38	5107.97	75	27.0774
2.258	11850.9	2837.26	0.23941	148.885	1615402.3458	175.391	4450.58	19	30.3571
13.474	9705.52	2209.78	0.22768	97.1801	1333734.5476	122.191	4866.92	47	29.1786
15.686	9772.43	4303.41	0.44036	94.8303	1364590.2971	154.642	3528.82	63	33.6481
9.525	10113.9	3119.92	0.30847	117.155	1354310.022	191.414	3747.64	90	34.3699
3.99	8528.96	3039.48	0.35637	97.2045	1201804.9194	131.41	3675.95	35	35.1897
5.259	10553	3184.68	0.30177	102.184	1473822.4168	154.449	4598.46	45	34.1185
12.486	6948.62	1580.92	0.22751	52.5896	968396.8598	85.487	3109.58	20	39.4263
1.78	9231.18	2844.32	0.30812	89.9883	1302786.6351	115.685	4534.44	48	33.3832
11.289	6106.08	1487.54	0.24361	66.4389	760379.0568	91.1326	2898.86	28	38.9326
0.832	7039.42	2048.79	0.29104	77.4522	968337.8248	112.37	3070.25	75	39.0351
1.226	8721.2	2451.89	0.28114	99.4435	1208142.1843	145.212	3262.04	17	36.3615
4.658	12566.3	4553.24	0.36233	139.979	1748284.8277	187.998	4470.62	50	30.9425
1.415	15728.7	2906.59	0.18479	176.403	2181870.3618	217.664	4751.49	36	28.3109
9.048	15002.5	5033.91	0.33553	96.6897	2082058.0573	222.602	15244.7	61	31.7999
13.972	10731.9	3581.04	0.33368	98.5697	1431603.7139	155.857	4564.94	45	31.1429
17.294	8791.92	2528.32	0.28757	77.5369	1228130.7192	109.975	4322.21	61	39.1269
13.358	9227.86	3582.5	0.38822	83.257	1286803.4047	128.214	4181.31	40	35.8033
7.416	5534.69	1475.41	0.26657	56.8006	730655.8671	83.4518	3500.51	34	39.7599
2.165	15764.8	3503.65	0.22224	167.719	2202946.4286	225.176	4913.37	79	27.5506
13.875	8103.83	1576.99	0.19459	71.864	1136109.6385	91.0121	3189.41	46	38.7648
15.673	8537.71	2493.5	0.29205	89.7387	1206210.885	130.266	4457.48	100	33.0205
13.572	7188.9	2193.28	0.30509	68.7632	1015271.5114	99.9261	3608.14	66	37.3265
2.648	11047.1	3249.38	0.29413	135.203	1582655.6852	176.496	4449.36	42	32.2973
15.252	8464.77	3828.64	0.4523	95.8491	1207356.281	135.198	3178.97	67	29.7794
18.154	14868.5	5477.53	0.36839	138.805	2127371.6665	201.638	5323.2	81	25.441
16.391	9255.61	2926.94	0.31623	76.8346	1264832.5006	123.855	3819.7	97	33.9679
15.361	6568.37	2535.58	0.38602	61.0571	866590.1481	115.479	2427.74	44	40.3456
6.15	17808.6	7236.46	0.40634	203.672	2500052.3301	287.159	5134.14	133	26.1533
3.185	15920.7	5235.62	0.32885	194.028	2120285.4116	256.674	5298.37	226	24.9502
12.264	8264.21	2828.19	0.34222	94.6972	1172818.2954	107.213	3528.24	40	36.8657
8.777	6066.72	1488.64	0.24537	69.4933	841556.0672	77.5638	2830.7	78	39.5132
1.849	8174.08	2388.28	0.29217	85.8253	1140775.6994	106.215	4062.34	31	35.4926
12.349	7482.83	1936.29	0.25876	58.5171	1057606.3577	90.8466	2736.71	13	39.5467
2.665	19592.2	6045.56	0.30856	261.116	2650540.705	318.36	5703.54	323	21.4701
2.734	9729.2	3223.95	0.33136	106.577	1372435.2287	125.292	3690.63	16	35.3971
18.22	13449.6	6238.96	0.46387	178.161	1878627.3919	262.413	5119.38	139	26.7185
2.179	8858.21	2951.26	0.33316	91.3048	1262450.0398	106.875	4208.33	19	34.4761
19.07	16513.9	6114.79	0.37028	200.31	2273559.7777	275.583	5542.8	193	20.7274
2.443	8424.73	2921.88	0.34682	93.1914	1191777.1445	122.754	3206.75	25	37.5499
1.38	8768.71	1863.39	0.2125	81.5204	1263344.7808	99.6288	3943.8	11	35.2024
20.754	8498.07	2399.4	0.28234	94.6018	1165721.8763	97.4976	4350.57	27	30.7924
1.197	8430.6	2692.97	0.31942	100.776	1155826.0206	146.996	3251.89	13	36.7026
9.424	6311.92	1890.18	0.29946	65.2446	863046.3412	103.877	3438.75	41	37.5186
17.044	15661.7	5066.61	0.3235	165.488	2264389.3983	211.248	6349.98	152	25.1452
17.958	9321.65	2959	0.31743	87.4061	1305148.1433	134.557	3508.99	104	36.2376
13.819	11016.8	4151.86	0.37686	96.3486	1560947.5107	163.391	5521.09	88	32.1833
18.394	7609.43	2673.34	0.35131	85.4899	1053712.0035	146.385	3529.7	81	30.8405
19.582	12688.9	4656.96	0.36701	62.7578	1765702.3536	179.811	5642.51	89	25.9166
3.285	20092.8	5935.08	0.29538	244.933	2784665.5385	326.865	5533.54	82	23.3408
1.174	6705.56	2114.33	0.3153	55.2646	933407.9212	97.6898	3705.07	76	36.7513
2.202	9972.79	2748.3	0.27557	118.04	1372701.4175	142.156	4169.07	114	32.8103
8.914	9060.65	2325.77	0.25668	83.5354	1283605.2571	116.813	4046.19	68	33.6373
13.338	9869.49	3354.94	0.33993	75.6856	1394851.3806	139.107	3786.63	18	35.3782
1.437	8978.93	2270.27	0.25284	84.7382	1285875.556	119.776	4035.88	5	33.8986
14.564	6533.12	2149.74	0.32905	62.5054	885501.3834	98.9046	2421.63	40	39.9791
2.913	14946.8	4421.83	0.29583	172.507	2056386.8796	259.368	4890.79	35	28.197
3.093	23320.4	7967.19	0.34164	265.084	3125131.0125	379.596	6506.12	305	21.0851
2.324	9356.16	2264.41	0.24202	107.926	1272182.7427	141.039	4037.36	41	33.9122
2.448	3852.5	967.27	0.25107	32.5402	546465.3659	46.2995	1779.59	8	44.5123
17.105	12186.1	4398.82	0.36097	106.883	1644190.9548	173.96	4978.24	67	30.3447
1.916	7412.58	2591.35	0.34958	75.9412	1035668.1133	94.1101	3732.34	29	36.3296
1.937	9023	2653.29	0.29405	89.2362	1220710.9931	123.045	3811.4	33	34.888
1.318	5732.45	1037.29	0.18095	50.492	824078.5788	72.5545	2845.98	58	40.1983
4.105	13073.9	3736.01	0.28576	148.053	1749706.3151	198.116	4738.3	55	31.0701
3.586	14921.7	4969.92	0.33306	159.293	2075180.2209	231.858	4770.17	77	28.3174
3.88	19684.3	6687.43	0.33973	257.243	2734433.3006	328.036	5447.83	92	23.8391
1.659	6141.89	1575.31	0.25648	55.8634	848657.4248	83.3776	2760.65	19	39.6417
1.523	14412.9	3544.92	0.24595	181.106	2027073.9799	202.762	4072.8	136	32.0174
1.612	5561.86	1078.02	0.19382	51.1426	792278.9229	72.9365	2880.49	58	40.2227
2.259	9467.31	2684.41	0.28354	87.7849	1325344.7563	133.266	4132.21	2	35.1323
2.657	7700.68	2293.53	0.29783	81.9618	1073757.8442	119.611	3867.26	48	35.3241
2.452	15632.1	4590.19	0.29363	209.32	2053927.817	242.206	6262.29	256	21.6865
13.903	22781.6	7186.99	0.31547	196.959	3279117.3243	346.423	6516.31	269	19.1526
7.117	11484.4	3826.63	0.3332	128.662	1610781.3562	160.903	4725.4	74	30.093
3.702	11787.5	3373.15	0.28616	133.707	1681012.1106	160.803	4499.77	59	31.409
1.283	8036.29	1938.98	0.24127	78.7386	1153830.3068	113.295	4041.3	102	34.9956
4.02	5686.6	1559.2	0.27418	63.0926	714907.2063	88.5745	2964.57	24	39.8677
2.499	13572.5	3522.46	0.25952	134.566	1893792.0742	161.54	4863.75	82	30.6188
11.904	3902.86	1350.08	0.34592	36.3014	538389.6954	49.8276	1382.57	26	44.4159
4.713	16428.6	4040.56	0.24594	177.379	2317426.1072	245.297	5084.33	99	25.9206
1.416	14867.6	2975.15	0.2001	189.027	2076958.5405	219.827	4691.42	30	28.5786
5.18	8526.79	2635.13	0.30904	90.3526	1151873.3883	133.054	3944.9	43	35.6839
3.387	11592.7	2953.79	0.25479	152.84	1623511.9455	149.474	4065.32	133	46.5464
1.578	10310.6	2638.74	0.25592	120.214	1421957.7855	169.389	4711.95	75	27.401
14.726	15624.1	5143.38	0.32919	204.949	2087004.0374	274.221	5393.13	228	27.0938
11.001	9476.27	4067.38	0.42921	82.2447	1267261.7066	150.864	3992.93	61	34.4386
18.407	21218.6	7438.94	0.35058	196.783	2822427.2217	299.913	5649.48	154	22.5436
13.543	9536.29	4452.93	0.46694	71.395	1300050.516	155.679	3277.52	41	37.9814
2.997	15039.6	3892.28	0.2588	199.911	2068699.1762	260.024	5056	168	25.1132
3.063	6784.8	2032.74	0.2996	64.0407	917312.9699	91.1672	3230.7	39	39.8773
2.13	9025.86	1940.7	0.21501	101.217	1246244.2225	137.51	3648.26	18	34.6675
3.311	7316.3	1591.08	0.21747	63.4707	1002888.1277	98.37	3516.18	29	38.231
3.515	7870.91	2158.72	0.27426	67.2952	1045053.6226	99.0195	3122.78	25	38.4217
2.93	9537.13	2719.99	0.2852	107.349	1335166.3067	155.097	4128.38	49	34.0533
3.302	20734.4	7997.71	0.38572	189.396	2876946.082	356.061	16359.07	156	22.6971
3.565	9115.54	2838.96	0.31144	89.4582	1306127.8111	124.933	3825.66	5	31.7797
4.016	19941.7	6333.94	0.31762	249.742	2759410.9951	319.383	5541.26	77	23.0509
18.284	5888.66	1286.65	0.21849	56.9445	774561.6647	71.4025	2945.17	29	40.9305
1.788	10333.8	1488.94	0.14408	144.709	1445257.8793	157.221	4601.91	140	29.8902
1.272	6816.93	2442.88	0.35835	76.1591	930202.2478	99.0812	3261.21	57	38.8708
16.819	18982.5	5910.91	0.31138	179.95	2688475.9337	245.378	6764.2	63	21.0489
2.144	8426.32	1898.83	0.22534	94.3127	1173859.1174	116.515	4162.74	43	34.3654
2.807	9017.08	2640.87	0.29287	76.6562	1255612.9813	115.043	4306.55	61	33.976
3.382	10072.1	2443.81	0.24263	95.638	1422496.8525	132.188	3851.38	127	35.8509
14.587	6463.8	2057.06	0.31824	63.7041	862876.3623	111.113	3341.83	59	37.8193
2.306	12321.4	4471.98	0.36294	105.24	1734583.9595	175.491	4535.62	16	31.4643
2.062	8690.19	2436.2	0.28033	91.0912	1171515.9537	114.398	3752.59	34	35.404
13.47	6543.48	2827.74	0.43214	75.9583	811859.4046	134.515	2065.43	92	41.5978
17.214	12225.2	2580.13	0.21105	128.993	1680539.731	159.718	3948.94	26	33.4175
13.288	5584.36	1687.52	0.30218	50.2967	778339.4572	85.711	2769.57	18	37.7726
9.834	8490.11	1746.51	0.20571	92.4787	1194853.811	111.603	3933.19	101	35.5434
2.575	9134.42	3184.35	0.3486	102.895	1225431.3182	129.48	3377.53	75	38.0164
3.126	5259.86	1807.31	0.3436	54.0899	730094.3077	73.0096	2526.8	28	41.5705
10.084	4582.01	901.76	0.1968	38.2	651616.1671	49.6453	1717.22	53	44.608
15.175	10039.9	3579.42	0.35651	93.3141	1428993.7265	140.052	4078.47	97	33.4436
20.42	18035	7851.91	0.43537	134.218	2445253.6888	278.493	6267.78	114	24.6631
1.834	6841.84	1806.77	0.26407	66.151	926900.8808	92.7842	2960	17	39.1523
4.835	9772.26	2891.14	0.29585	94.3971	1379422.8347	127.621	4142.77	106	33.4773
3.428	12121.2	3097.61	0.25555	150.006	1710148.6496	194.158	4721.56	59	29.0767
11.21	7708.33	2360.84	0.30627	72.756	1057631.7966	107.34	3104.74	53	37.9621
8.052	7199.18	2405.06	0.33407	52.8504	975577.0528	101.323	2781.63	40	40.4899
13.656	9151.27	2900.64	0.31696	86.1895	1259985.799	129.404	3620.64	42	36.5321
10.284	8000.45	2973.33	0.37164	80.7645	1116450.2423	114.267	3760.36	53	35.6669
3.198	10328.2	2794.05	0.27052	136.383	1396071.0385	137.736	3887.06	130	32.9402
2.638	8306.66	3024.22	0.36407	83.6331	1140469.4411	120.353	3852.2	24	36.0791
1.501	14866	3002.39	0.20196	183.837	2062582.454	229.114	4721.26	24	25.6749
1.139	13761.2	3971.29	0.28858	185.028	1915690.7364	218.576	5535.02	139	19.6774
2.054	9548.18	2864.02	0.29995	102.442	1321869.0699	140.114	3465.61	123	33.3283
10.81	12063.5	3441.61	0.28529	112.302	1735835.2761	171.556	3833.32	143	35.6971
20.123	15689.3	5462.48	0.34816	153.933	2150470.3954	252.979	8490.08	31	33.1384
2.71	3349.89	1030.51	0.30762	24.3875	457690.3496	33.5225	1394.71	1	45.4079
2.791	13363.2	3332.85	0.2494	140.314	1815301.7074	164.553	4007.12	208	32.2176
2.163	13462.5	3781.02	0.28085	149.774	1829682.5277	199.32	4615.35	30	29.7787
4.652	9419.59	2924.73	0.31049	60.6301	1292113.9113	139.552	3992.74	25	33.8318
3.476	9436.99	4498.36	0.47667	87.9869	1314080.5546	155.815	4314.77	94	32.481
17.184	8907.24	3384.01	0.37991	82.4089	1219451.3741	146.422	3494.7	93	36.1088
2.337	9502.14	3425	0.36044	101.003	1338975.9314	136.419	3653.9	13	35.1578
1.437	15019.8	3816.77	0.25411	176.666	2122149.8182	213.917	5689.69	67	23.015
3.426	15980	4187.88	0.26207	214.335	2215390.3446	252.396	5176.62	160	25.2922
7.156	5446.58	1498.34	0.27509	34.1229	746863.8687	69.9627	2102.9	16	42.6393
1.664	5795.01	1743.8	0.30091	71.1473	810872.5016	84.8449	3042.38	34	40.2244
14.401	8398.39	4269.42	0.50836	86.376	1045731.8814	174.416	2596.45	85	39.5156
2.569	12754.6	3523.76	0.27627	149.471	1782702.1657	214.67	4884.4	203	27.7262
5.344	10942.4	3688.86	0.33711	97.9169	1528418.4031	143.901	3609.63	23	35.3867
6.628	11513	2505.49	0.21762	124.533	1616131.0973	155.325	4559.58	51	30.5639
16.319	9154.05	2016.83	0.22032	108.509	1266784.7611	127.944	4028.23	80	35.0234
10.772	4424.1	1022.65	0.23115	45.8909	550865.2265	67.6236	1851.73	39	43.4873
4.205	23413.6	7417.76	0.31681	310.891	3231915.3651	382.665	6364.46	119	17.4526
1.046	11167.1	2944.24	0.26365	143.865	1550308.2494	180.594	4642.16	166	28.4243
1.957	15911	5100.22	0.32054	198.253	2208083.4909	237.168	5373.12	170	24.2065
4.415	5002	733.94	0.14672	45.2173	625698.4891	65.845	1975.85	35	43.4667
16.033	7387.99	2828.86	0.38289	76.5562	991376.7828	119.157	3515.79	57	36.5767
14.843	4103.29	1602.21	0.39046	26.1419	563351.8147	53.0686	2249.11	6	45.4214
1.337	6397.79	1662.08	0.25978	71.3599	840593.3974	90.9084	3435.86	76	37.9354
8.486	4612.55	1439.99	0.31218	40.8724	620274.7921	59.8228	1488.49	16	43.967
4.977	7188.29	2261.99	0.31467	70.2348	976867.9819	96.1204	2978.66	101	38.4894
2.437	8396.66	2272.97	0.27069	86.9098	1188057.2047	120.149	3312.63	5	37.6525
9.455	18049.2	5831.99	0.32311	190.37	2562022.1143	262.587	5187.19	47	25.1876
1.071	14864.6	4369.04	0.29392	190.258	2068290.3975	224.034	5676.28	135	22.8175
15.706	8343.98	1971.68	0.23629	88.5282	1174434.0273	123.628	4123.24	89	34.2247
3.027	18225.3	6219.74	0.34126	206.405	2484797.5599	285.946	4965.53	54	24.2254
19.375	9012.94	3601.56	0.39959	110.512	1242478.6218	174.797	3697.33	133	34.7559
4.078	10603.6	3639.86	0.34326	69.3135	1436461.8917	149.469	3707.88	44	35.2617
5.014	8493.88	2809.98	0.33082	67.8854	1122195.7501	123.217	4879.11	69	32.2589
11.222	8569.86	3198.24	0.37319	74.8826	1169048.6291	116.638	3878.33	14	35.973
15.01	9716.89	3345.87	0.34433	93.7844	1390022.1616	148.442	3682.02	94	34.5174
11.992	4917.7	1198.51	0.24371	37.683	673259.0686	60.2082	1948.06	7	46.5464
13.896	7875.5	2231.41	0.28333	72.7881	1114788.8268	104.217	3283.91	57	38.0837
5.736	14938.1	4745.59	0.31768	177.754	2100264.0151	240.508	4642.3	36	28.3221
3.459	8981.37	2662.35	0.29643	103.255	1240022.8874	123.021	3885.18	25	34.0082
15.005	7484.15	2114.45	0.28252	54.7688	1070693.9394	85.7881	3497.87	57	37.951
2.57	16970.3	4759.88	0.28048	210.908	2346247.8278	289.384	5192.4	178	24.983
3.887	5413.14	2130.82	0.39363	48.8476	748915.861	80.4418	2256.77	26	42.0474
16.129	7669.06	2767	0.3608	64.4557	1074638.1505	109.992	3373.09	45	38.1294
17.943	18489.2	5202.07	0.28135	182.543	2613281.0617	222.299	5694.46	56	23.8024
1.507	9605.62	2857.79	0.29751	86.0884	1375008.5055	128.398	4165.52	12	33.2494
4.955	6594.64	1546.87	0.23456	57.1282	878684.6983	80.31	3134.24	30	38.0584
5.578	14863.6	5605.46	0.37712	200.273	1980156.0473	259.149	5166.57	73	27.014
17.266	7614.05	2436.86	0.32004	64.9103	1048276.5217	110.057	4198.52	65	34.9589
18.713	10169.9	1985.34	0.19521	95.7779	1428321.6353	121.754	3999.94	59	33.3032
7.859	6209.31	1944.12	0.31309	63.2861	822112.8598	92.6329	3099.84	63	39.9527
7.798	6091.67	2166.43	0.35563	63.896	828661.0361	93.0652	3258.43	38	38.1792
12.312	4837.79	1327.49	0.2744	40.9513	667402.3639	67.7433	1493.47	14	43.2594
5.519	6902.59	1593.07	0.23079	96.8011	956098.7228	88.5974	2997.75	20	38.2608
13.371	11199	4207.62	0.37571	92.7453	1560642.6607	150.704	4303.54	120	32.129
10.224	4442.87	1385.53	0.31185	41.4677	604094.3951	63.235	1459.56	7	44.2817
1.738	9534.87	2408.29	0.25257	77.0124	1369899.8715	116.949	4653.62	92	32.3665
12.979	8881.27	2534.52	0.28537	72.1369	1256489.9152	113.945	3370.24	54	37.3396
5.271	6805.47	1339.23	0.19678	64.767	921816.1777	74.472	3329.51	55	38.8695
2.648	15635.7	4879.36	0.31206	223.55	2058426.3009	248.881	5952.53	240	22.0253
0.87	14991.7	4384.97	0.29249	195.305	2084877.0098	222.425	5619.36	141	22.754
5.955	7805.39	2583.5	0.33098	65.455	1042743.9452	120.635	4021.8	58	36.2345
2.252	12201.8	3054.28	0.25031	120.716	1666076.0962	160.521	3944.45	225	32.5965
2.225	11307.9	3751.39	0.33174	129.107	1585217.8286	174.119	4206.95	40	30.8552
17.153	21800.1	8823.9	0.40476	190.842	3056260.2141	382.516	14403.34	143	25.7968
4.021	6298.25	1464.32	0.23249	60.5912	869490.5625	77.5625	3163.34	26	38.3074
4.34	9770.83	2223.04	0.22751	121.378	1381356.2625	127.285	3793.67	62	35.128
3.075	14638.1	4428.72	0.30254	171.48	2026558.6403	245.471	4866.72	22	28.116
12.958	6639.09	1833.4	0.27615	64.9371	908469.9094	83.88	3413.07	82	39.2161
1.459	5389.08	1161.68	0.21556	52.0487	775574.5737	69.827	2868.53	59	40.3509
9.734	6792.65	2668.33	0.39282	56.9178	934109.5174	103.324	3723.01	23	39.4405
6.147	18898.1	6151.19	0.32549	142.305	2581429.9797	252.993	7048.63	98	31.7842
3.718	19617.7	6467.48	0.32967	139.433	2686272.6535	272.7	5866.39	187	22.2207
15.759	9741.86	2927.9	0.30054	96.3519	1319721.349	103.383	4784.71	14	34.957
3.443	13073.9	3736.01	0.28576	148.053	1749706.3151	198.116	4738.3	55	29.98
3.086	14850.6	3555.8	0.23943	177.851	2131988.2198	218.899	4921.43	79	27.7152
3.139	8801.26	2692.18	0.30588	79.9083	1227456.3713	112.187	4344.84	62	34.0203
3.658	16210.2	3874.39	0.239	179.71	2135575.5312	246.224	5089.52	152	26.4078
11.439	9853.3	2942.29	0.2986	73.1983	1374878.6594	123.697	4513.93	19	34.4105
4.738	7855.12	2350.14	0.29918	82.1692	1065326.4346	101.284	3613.17	12	36.7844
4.833	23028.3	7399.03	0.3213	255.474	3095804.9153	257.682	5334.71	253	24.549
3.208	8513.14	2564.98	0.30129	111.292	1161659.4401	154.812	4009.23	101	32.7797
18.748	13919	5068.06	0.36411	188.091	1963711.0626	234.898	5312.4	178	27.1235
2.466	17332.7	4983.65	0.28752	227.774	2409078.8882	282.981	5727.28	198	21.8532
3.747	9649.03	2291.76	0.23751	86.3962	1365355.4734	110.118	4779.12	30	32.7941
12.849	6729.02	2781.1	0.41329	63.2249	985861.5456	97.5235	3060.92	28	39.3233
3.941	5423.68	1366.54	0.25195	48.6014	687646.5248	77.2487	2317.9	24	42.5998
2.006	5933.96	1696.4	0.28587	46.1302	826609.6675	78.3229	3062.63	15	41.4051
1.429	10502.4	4541.84	0.43245	84.9421	1479424.4314	169.112	4512.42	93	32.714
1.001	10780.8	2503.14	0.23218	152.61	1514721.6258	184.126	4603.68	50	29.9339
2.275	9149.38	2705.8	0.29573	102.744	1268698.7715	124.191	3905.5	20	33.8987
2.01	8757.7	2486.06	0.28387	77.4158	1222507.4216	109.393	4181.74	63	34.3706
3.38	5694.01	2153.82	0.37826	54.1455	782274.9674	80.9787	2686.73	22	40.5869
1.884	18988.5	4227.33	0.22262	220.099	2670973.4325	280.926	5570.51	94	23.5732
7.568	9217.19	3132.22	0.33982	78.205	1254230.2364	122.467	3858.95	94	34.7425
3.299	21286.2	6536.43	0.30707	245.894	2966734.4673	318.957	5587.36	73	23.1025
20.786	15684.2	6953.18	0.44332	195.893	2059031.1429	297.037	5640.01	134	23.2813
2.204	16787.4	4730.44	0.28178	230.773	2324111.2231	267.578	5686.81	198	22.1472
1.793	5194.34	994.32	0.19142	48.9593	741346.6662	67.4161	2919.89	55	40.0471
1.277	5269.2	2136.25	0.40542	33.6548	746862.7804	71.2094	2440.42	38	42.7156
9.612	7363.69	2199.16	0.29864	65.8176	1016565.2649	99.0617	3431.7	34	37.6492
12.466	6143.83	1574.51	0.25627	65.1444	856171.6639	108.703	2789.53	83	41.7136
3.018	13956.1	4978.61	0.35673	163.391	2047986.6589	263.32	4857.75	84	26.0054
2.012	7020.81	2044.64	0.29122	61.5261	976360.2624	91.7073	3065.94	88	38.1758
1.307	6647.61	2238.09	0.33667	62.8886	898026.8466	97.6123	3060.9	21	40.4059
9.047	7801.4	2875.13	0.36854	54.4519	1042579.7542	121.6	3129.72	39	41.1653
3.279	13770.6	4578.43	0.33247	136.535	1930475.8527	194.546	4340.83	36	31.4138
15.402	6717.47	3507.65	0.52216	73.7372	895637.8159	135.631	2845.73	55	39.4369
3.793	10398.4	2559.26	0.24612	116.571	1467417.6422	150.775	4325.37	62	33.2667
6.675	14148.3	4094.81	0.28942	114.791	1935193.4719	237.366	4252.78	93	31.1352
1.95	8675.11	2291.08	0.26409	90.9649	1183234.7991	121.088	3222.84	71	38.6689
14.151	5884.37	1352.71	0.22988	59.8309	789677.9146	87.4651	2857.44	61	40.6999
2.217	9933.38	2847.7	0.28667	99.4328	1360199.9357	145.293	3871.26	119	32.9638
19.816	12645.4	4890.81	0.38676	85.4388	1794347.1335	190.079	4698.32	78	31.4164
16.201	8075.29	3374.16	0.41783	52.8517	1120041.8915	138.951	3065.73	72	38.7229
1.886	9781.66	2780.14	0.28421	89.8147	1377222.8607	123.767	4625.65	51	33.334
18.041	11153	2947.39	0.26426	102.318	1524221.6682	130.984	4081.9	14	34.8645
16.502	7749.39	2231.2	0.28791	85.0234	1025985.8248	112.391	3270.33	21	46.5464
2.167	8292.79	2401.25	0.28955	96.3881	1174552.1755	112.687	3558.21	93	36.7574
13.5	7201.07	1721.37	0.23904	59.2554	980710.269	95.848	3472.01	35	37.3488
2.299	6143.24	1531.13	0.24923	54.7989	858181.3321	70.9963	3362.2	58	38.8321
16.695	12280.7	4492.18	0.36579	132.437	1757039.2951	185.199	5128.21	125	27.1657
17.868	15509.3	5775.23	0.37237	113.379	2214214.2982	245.126	4089.69	96	33.949
7.081	6997.5	2161	0.30882	61.6332	992216.0467	90.0566	3937.39	46	34.8783
13.365	8643.26	2371.78	0.2744	58.7999	1228272.5481	93.9961	3430.26	71	38.2306
15.828	7389.74	1701.22	0.23021	63.6264	1046126.4351	84.5514	3056.34	32	38.8708
14.326	7792.25	1785.71	0.22916	96.3778	1072706.1472	112.202	4009.65	80	34.9069
14.808	4690.2	1083.15	0.23093	42.6451	639824.0449	69.0055	2571.9	21	41.3866
2.02	9581.08	2213.3	0.231	106.492	1316684.4671	145.681	4006.3	37	34.0777
2.674	10812	2772.54	0.25643	132.273	1514717.8296	160.343	4328.94	40	32.4133
13.555	8092.24	2265.07	0.2799	96.9022	1086862.2961	101.171	3394.49	42	35.6469
11.276	8953.79	2487.05	0.27776	63.5098	1237752.0086	120.829	3905.54	37	36.1962
1.989	8996.39	2469.34	0.27448	95.2215	1224381.821	124.52	3248.33	80	38.5264
14.481	7981.35	2972.98	0.37249	65.0336	1137804.217	115.136	3492.74	21	39.0693
10.129	7960.51	3102.87	0.38978	90.3082	1071434.1969	153.75	3674.94	63	35.6234
9.433	11637.2	4163.38	0.35776	80.0733	1644329.8668	160.432	4327.15	80	34.2839
3.694	9166.37	3902.35	0.42572	85.0753	1281525.0417	141.618	3732.06	111	34.8975
0.889	10789	2892.84	0.26812	137.63	1494757.3759	171.969	4693.28	173	28.8194
2.963	9984.78	2744.91	0.2749	116.786	1401256.4984	150.102	4153.08	45	33.1112
18.714	12132.6	5146.19	0.42416	141.046	1717361.0121	193.523	4669.77	132	30.4317
16.231	7725.48	2546.72	0.32965	74.6927	1075573.554	97.4814	3031.49	22	38.53
3.464	14502.5	4097.21	0.28251	129.669	2023978.7617	193.931	4740.16	77	29.548
13.994	5839.06	1111.72	0.19039	56.1744	803807.5809	79.3453	2369.68	17	41.0367
6.488	5457.99	1051.33	0.19262	49.845	752027.227	68.6438	2239.61	34	42.4366
11.284	5814.97	1671.47	0.28744	60.5789	783650.9901	83.9968	3237.27	43	39.2493
11.164	8030.18	2668.96	0.33236	57.6302	1092054.7992	119.535	3482.52	28	38.5295
14.189	18476.2	5008.56	0.27108	178.739	2608080.0362	230.834	5739.89	64	23.0575
3.451	5692.31	982.12	0.17253	60.8543	765421.1219	79.6769	3125.15	48	39.4738
14.433	11871	4894.15	0.41227	116.442	1609505.366	193.225	4626.01	96	29.5313
0.938	11289.3	2543.23	0.22527	153.93	1595596.8307	178.049	4597.71	54	30.0359
3.695	16044.4	4559.61	0.28418	149.372	2260626.7602	178.961	5206.39	65	27.5809
3.401	13381.6	3803.58	0.28423	147.031	1814078.2419	207.669	4728.36	32	29.2116
1.224	7957.3	1746.4	0.21947	96.3938	1073853.363	122.734	3370.01	10	37.4955
3.218	9880.66	2933.93	0.29693	112.084	1392923.0708	156.049	4209.5	58	33.575
2.898	7758.34	2187.88	0.282	81.6881	1104826.1864	105.635	3915.24	37	33.6399
3.887	11946.4	4454.11	0.37284	130.334	1671544.8422	199.801	4205.34	55	32.3266
18.244	10954.8	4067.09	0.37126	97.6749	1504771.8524	172.742	3841.74	97	34.705
2.324	9536.63	3555	0.37277	105.086	1345347.366	136.918	3634.63	10	35.3592
10.746	10809.3	4407.26	0.40772	91.4208	1548890.8123	144.384	3919.47	83	36.4935
1.427	6032.67	1902.11	0.3153	55.6193	835937.4172	90.5902	2732.15	39	40.2197
12.897	7955.53	2364.81	0.29725	64.6848	1132268.7701	97.3995	4044.82	57	39.534
4.045	10024.7	3084.56	0.30769	90.4847	1430522.7089	128.604	4177.4	106	32.7141
7.308	8302.88	1622.9	0.19546	64.1801	1169525.1437	88.7541	2843.55	30	46.5464
20.135	15823.9	4577.37	0.28926	183.13	2182617.8917	249.698	5480.99	148	25.9081
1.819	8813.81	2433	0.27604	84.8516	1227617.3013	114.442	4085.96	44	34.8702
4.504	9885.39	3123.55	0.31597	93.6748	1393406.3383	150.869	3994.67	36	34.426
6.384	13178.9	4526.18	0.34344	132.412	1837431.7498	181.629	4387.34	44	31.1643
2.362	11671.8	3964.72	0.33968	127.836	1631451.7351	181.814	4207.12	33	30.4994
3.127	8547.91	1891.14	0.22124	100.013	1197956.4492	118.911	3820.09	37	34.4849
1.824	9628.38	2845.83	0.29556	101.112	1350761.3293	134.066	3656.09	8	35.28
1.289	5772.31	1396.01	0.24184	56.8611	796262.391	83.6407	2631.84	23	40.9908
16.644	7213.06	2294.97	0.31816	59.7648	1001945.3467	96.741	3022.65	63	40.0901
11.868	5601.8	1276.01	0.22778	37.3844	692709.2137	93.2833	2714.9	5	37.4495
1.39	8830.37	1897.93	0.21493	77.3504	1281269.0575	106.543	3884.29	9	34.8064
14.148	7747.52	2054.08	0.26512	72.8139	1094240.7715	87.7675	3148.68	50	39.98
1.823	10843.9	2477.09	0.22843	113.014	1527702.8779	149.958	4580.95	62	32.5067
17.626	14623.5	5132.84	0.35099	121.202	2083904.1739	211.232	4605.08	137	33.0071
18.882	13783.1	4867.5	0.35314	124.855	1974900.486	212.703	4945.29	136	27.8231
5.83	10437.2	2674.06	0.2562	94.9381	1464357.2319	139.996	4069.64	149	33.5414
3.587	8747.78	2552.72	0.29181	97.2563	1176924.8393	126.368	3367.17	69	38.175
1.769	8067.24	2275.93	0.28212	89.7446	1131128.2881	102.425	4017.37	21	35.8618
4.008	5168.72	1676.04	0.32426	45.2684	725483.2501	64.8397	2007.64	3	42.2521
0	5435.54	1004.5	0.1848	48.9854	756944.3683	67.4329	2929.71	1	41.5276
3.747	11867.7	3632.35	0.30607	109.036	1625403.1748	166.557	4581.58	18	31.7069
2.432	12221.8	3043.85	0.24905	124.814	1664352.6782	159.379	3986.04	235	32.3237
2.117	5448.85	1618.3	0.29699	47.1738	759417.5461	70.8557	3065.55	18	41.0548
1.472	3748.31	855.43	0.22821	31.7945	536156.8206	46.3848	1754.07	14	44.4912
17.314	13677.4	4463.05	0.3263	123.725	1956065.016	174.695	5547.99	142	28.9607
1.97	9996.03	2700.49	0.27015	95.1648	1415377.8968	139.78	3701.47	125	35.4498
4.366	7697.74	2418.86	0.31422	70.6975	1086317.536	99.021	3410.9	40	36.6817
17.168	10929.1	4529.06	0.4144	93.8278	1532998.5863	165.413	3768.58	73	33.7784
4.867	14902.8	4429.81	0.29724	165.697	2064465.3442	237.957	4910.77	110	25.5941
3.58	9277.23	3179.47	0.34271	88.6872	1293668.5958	132.269	3746.48	20	37.6598
3.431	10448.6	2936.99	0.28108	112.053	1472091.0614	160.306	4249.11	65	33.4439
12.709	6081.43	2173.75	0.35744	58.2662	870126.4441	92.2224	3215.58	24	39.7939
14.079	8341.21	2004.65	0.24033	72.7346	1144237.5134	95.0722	3488.79	53	35.7202
15.44	10660	4553.23	0.42713	94.3496	1479627.1429	161.227	4306.29	80	36.5453
1.126	9559.9	1672.09	0.1749	100.208	1355378.8578	120.31	4015.89	44	35.2701
7.051	11031.1	2469.78	0.22389	92.391	1514641.5798	127.275	4028.69	132	33.8074
2.597	9240.25	1814.41	0.19635	88.6119	1296801.1412	103.453	4700.89	21	33.1574
1.531	15874.6	5234.59	0.32974	215.07	2210002.2743	262.374	5324.97	295	24.8234
3.327	12461.6	3698.39	0.29678	150.145	1716505.3773	178.632	4389.89	41	30.7252
3.31	10018.9	3744.66	0.37375	119.799	1380431.1155	177.799	3748.42	36	33.1845
6.408	6903.77	2761.25	0.39996	64.2579	981496.8024	96.7155	2375.81	75	40.4003
7.403	9200.96	3111.21	0.33813	93.6619	1329307.4845	142.468	3882.82	53	32.067
1.954	7635.69	2698.65	0.35342	77.6682	1059024.1368	98.8094	3842.01	36	35.6824
4.418	9040.47	2657.62	0.29396	65.7976	1252989.3063	131.274	3955.54	21	35.0971
16.489	5541.95	1882.11	0.33961	54.4296	771208.4926	84.7454	2702.23	47	40.4456
18.022	9153.31	3530.83	0.38574	100.151	1274354.5771	151.204	4023.23	61	34.6957
6.437	7516.9	1922.53	0.25576	76.2006	1020293.1717	99.2669	3577.09	34	34.7623
4.545	8983.88	2557.66	0.28469	98.7284	1260093.2204	153.392	4233.79	70	33.4139
4.894	6410.13	1540.48	0.24031	61.748	886140.3451	85.5025	3315.8	27	37.9924
14.255	7101.12	2098.56	0.29552	61.0322	993562.486	92.7175	2944.38	46	38.3351
1.951	12499.9	3065.94	0.24527	148.894	1724153.5329	205.545	4236.95	63	24.2918
6.805	9509.21	3134.18	0.32959	111.082	1311863.8377	153.773	4006.69	53	34.054
4.437	7060.04	2634.56	0.37316	76.7575	968649.1726	111.979	3949.5	32	35.1449
2.749	16265.5	5831.04	0.35849	227.665	2214313.7243	319.435	5916.35	193	20.9352
12.901	9228.07	2612.35	0.28308	82.6916	1304156.1	122.84	4174.19	68	34.3665
2.144	15240.6	3982.84	0.26133	199.368	2119539.8765	261.077	4971.25	136	27.4939
1.918	9673.7	2383.61	0.2464	111.238	1345623.1815	137.189	4169.97	56	33.8933
0.709	7816.26	2074.53	0.26541	89.0178	1100947.6497	127.534	3125.99	5	36.9605
10.986	5875.84	1925.28	0.32766	57.0766	818508.8183	78.0498	2722.87	41	40.5145
1.729	8157.52	1563.49	0.19166	74.8017	1149217.9758	105.827	3786.46	17	34.1732
16.465	9193.35	3182.58	0.34618	88.9118	1227170.5785	123.918	3736.79	32	34.7582
3.387	22937.9	7282.61	0.31749	310.117	3181268.2235	382.724	6284.51	102	18.9099
2.277	7893.39	1746.31	0.22123	79.4017	1122121.1983	98.8803	3883.72	39	35.3587
7.415	6472.59	2530.88	0.39101	62.5275	913986.1019	88.4869	2351.94	76	40.7397
9.785	16702.6	5376.67	0.3219	201.327	2229346.5707	240.276	5440.25	114	24.1095
1.563	8912.35	2426.4	0.27225	99.4618	1219017.4757	128.957	3453.48	124	36.3272
16.298	13264.5	4845.78	0.36531	97.6713	1841438.0861	181.883	5545.22	102	27.9791
15.283	6438.29	1660.56	0.25791	40.2439	886297.8504	80.3624	3580.93	40	39.9594
12.364	5880.22	1189.91	0.20235	51.548	825605.8471	71.3847	3048.93	57	40.0299
16.701	10686.4	4035.23	0.3776	113.681	1476986.8057	163.601	4568.79	145	30.4699
1.977	8859.43	2558.55	0.28879	79.7662	1233886.0991	112.87	4268.21	61	35.1277
13.395	7189.99	1408.95	0.19595	69.5716	1013358.7343	90.9469	3194.07	30	37.5949
1.873	14434.4	3843.73	0.26628	190.415	1970993.5033	217.965	4602.33	179	28.8378
4.393	15490.8	3854.27	0.24881	249.799	2108224.5905	261.771	4773.4	298	27.6559
2.766	7422.99	2215.8	0.2985	64.8606	1009247.4112	91.7462	3136.06	35	39.9737
16.472	7447.86	3032.03	0.4071	67.0604	1023742.9877	118.067	2790.58	88	39.1679
8.11	6042.07	1396.62	0.23114	55.4482	865155.6811	73.5232	2350.71	59	42.142
11.554	5132.69	1217.24	0.23715	44.6611	683560.1673	73.7594	2849.48	74	42.8814
2.218	5922.36	1603.96	0.27083	61.4959	746402.2155	88.2259	3106.44	19	39.3923
1.484	8423.28	2613.83	0.31031	97.1587	1156527.3741	144.861	3249.38	13	36.4711
4.268	19317	6449.2	0.33386	255.728	2675577.3697	329.657	5425.33	86	22.8087
4.721	8733.36	2443.67	0.2798	107.206	1241845.9486	136.639	3893.2	70	34.8217
20.091	18730.5	6761.55	0.36099	203.145	2590184.7238	296.4	6045.29	42	24.2788
13.804	10966.3	3379.87	0.3082	86.3535	1466226.0225	165.006	4180.57	7	33.2455
16.962	16995.8	5408.46	0.31822	175.942	2432196.1795	269.145	4894.73	148	27.4739
11.927	8272.24	2817.63	0.34061	78.0807	1105832.486	122.483	3508.71	68	36.6777
4.487	10638	3607.07	0.33907	93.1018	1442817.0348	160.003	4701.24	92	31.4605
8.519	18180.8	6172.93	0.33953	198.591	2478457.6285	273.51	5639.45	95	24.1192
18.806	8913.75	2504.43	0.28096	72.7225	1226641.2386	110.636	4540.28	86	31.0729
20.438	22574.1	9282.28	0.41119	183.542	3073494.7207	358.344	5266.45	94	29.3074
14.975	10045.8	4214.39	0.41951	105.876	1363665.745	151.04	3360.22	89	38.0532
7.538	5448.99	2528.24	0.46398	48.41	742111.8047	95.8521	2194.04	7	41.5378
2.162	14428.5	3979.79	0.27582	182.036	2044751.2242	234.596	4511.37	31	30.6557
2.177	15102.5	3274.62	0.21682	185.948	2107702.1377	229.475	4716.83	37	28.3731
1.043	7948.6	1609.4	0.20247	75.9739	1137172.8705	108.537	4045.88	103	34.9114
16.399	11219.9	3940.81	0.35123	104.135	1562039.7751	155.453	4001.24	25	33.6349
4.181	11799.4	3661.95	0.31035	126.299	1618749.3985	164.199	4989.96	82	28.6292
1.351	36995.4	13535	0.36585	312.05	4978616.0418	528.89	8946.71	278	18.6898
16.733	9452.16	3266.88	0.34562	72.3551	1315453.4637	130.123	3903.36	68	35.6588
12.539	5065.06	1814.25	0.35818	57.3966	661347.1783	88.2492	2643.6	5	37.3783
14.283	8738.51	3283.5	0.37575	87.7824	1186239.8522	143.184	3513.9	15	36.1974
2.629	3767	983.81	0.26116	35.0857	512452.4033	43.0478	1287.1	21	43.8093
2.699	8361.75	2096.22	0.25069	82.1739	1173580.7952	99.2822	3978.48	38	35.0081
3.493	7528.58	2903.77	0.38569	80.0061	1038884.29	99.22	3856.3	26	35.5734
11.191	4682.83	1635.61	0.34927	34.8794	665037.5552	60.8056	2594.31	53	43.162
6.025	8605.42	1967.89	0.22868	62.6548	1254158.1695	89.0824	3082.52	31	38.0895
1.181	9889.14	2322.78	0.23488	121.87	1372701.4551	160.722	4597.45	75	30.219
3.723	11625.5	4129.21	0.35518	125.902	1585368.3352	200.173	4088.82	34	31.9269
2.388	18613.3	5906.83	0.31734	266.57	2522865.0792	308.105	5721.71	306	21.5107
15.908	9727.83	3008.97	0.30931	76.2364	1344415.9203	105.188	3648.14	39	35.6269
2.233	10495	2410.89	0.22971	118.836	1414914.492	170.715	3992.91	83	32.5986
3.946	11801.3	2836.73	0.24037	90.0117	1654186.8971	149.66	4583.51	159	31.4906
13.402	6592.6	2308.28	0.35013	71.1308	930956.101	102.719	2924.32	20	39.6486
5.862	8938.51	2258.41	0.25266	75.2732	1263224.2567	104.669	4148.17	25	33.875
13.15	11164.6	4081.4	0.36556	93.3492	1580222.885	161.446	5527.04	98	30.2709
1.873	8421.44	2686.08	0.31895	94.309	1131704.6559	126.846	3158.26	79	38.9288
0.852	6897.71	2046.98	0.29676	71.5765	931485.1042	108.522	3051.17	82	39.0408
6.905	8371.58	2695.34	0.32196	74.6901	1170015.2535	103.231	4018.2	25	39.7432
15.196	8532.39	2448.18	0.28692	88.4333	1160465.5808	110.901	3785.74	59	34.8169
11.739	7533.26	2186.39	0.29023	61.1492	1036620.6677	102.228	2744.66	16	39.5697
1.309	15052	4741.54	0.31501	159.948	2074559.1223	229.032	5440.47	194	26.0683
3.178	9626.34	2898.47	0.30109	100.767	1345444.2344	137.074	4018.84	25	34.4512
0.811	8578.06	2148.14	0.25042	99.9224	1188513.3617	128.72	3275.27	5	36.698
8.931	8029.82	2489.94	0.31008	72.245	1136166.2138	106.614	3812.92	12	36.1089
3.935	7514.55	2100.92	0.27958	72.8904	1019700.1336	104.447	3386.78	74	37.0119
9.472	5610.18	1719.09	0.30642	45.4352	792055.8858	76.7441	2575.33	39	38.71
17.361	6482.62	2098.35	0.32368	61.5782	862383.2388	109.339	2732.11	51	37.8155
3.001	18535.1	5238.55	0.28262	246.58	2490569.8577	307.948	5657.78	312	21.747
3.306	5985.8	1515.57	0.25319	42.3021	834535.2676	81.5455	3354.37	30	39.4366
3.472	14161.4	4444.05	0.31381	173.937	2049197.7018	266.039	4926.79	80	27.0816
3.228	10957.2	3302.08	0.30136	129.597	1502091.0663	158.58	4896.19	70	29.3945
0.941	11619.6	2447.12	0.2106	150.601	1648498.552	171.178	4604.66	54	29.9873
18.055	12137.1	4651.53	0.38324	127.69	1758165.5106	190.602	5327.06	154	24.2331
17.904	7781.6	2781.85	0.35749	73.3459	1101757.2504	120.293	3654.5	82	38.1255
2.394	9337.76	3134.65	0.33569	114.678	1327950.4458	127.195	3759.37	79	35.2927
2.477	9461.89	2192.27	0.23169	102.476	1327435.4832	123.398	3497.62	122	36.5787
5.235	6460.73	1465.31	0.2268	63.8442	893218.7267	86.662	3344.48	25	37.788
2.598	14375.1	4289.19	0.29837	158.288	2043819.3156	226.81	4892.96	48	29.6996
14.503	7745.46	2947.56	0.38055	67.2899	1088238.2797	113.444	4010.52	66	35.4636
1.726	6867.66	1796.27	0.26155	66.7208	942432.8323	85.1582	3077.86	49	39.6067
15.253	6869.77	1477.45	0.21506	69.9211	975051.0803	80.07	2681.54	83	40.2066
13.969	5852.78	2423.81	0.41412	49.099	796014.1046	100.174	2491.75	64	40.8937
5.287	11072.7	3367.67	0.30414	101.011	1532094.7527	153.267	4336.41	24	33.3796
3.11	9170.27	2115.41	0.23068	93.7628	1286288.576	127.47	3857.31	42	35.0907
1.854	7190.9	1996.5	0.27764	79.3196	989385.7935	112.01	3066.54	83	39.1804
2.145	8861.36	2357.91	0.26608	85.5875	1206161.1066	118.23	3725.42	30	35.3986
15.215	19248.9	5915.55	0.30731	179.61	2716867.3572	241.911	6034.04	58	19.8175
2.837	8831.18	1884.89	0.21343	100.989	1238202.353	121.564	3842.13	62	35.328
2.838	7821.39	2376.08	0.30379	68.6263	1092956.9209	108.828	3649.33	54	37.4261
17.445	8972.71	3070.23	0.34217	67.4482	1269041.7613	124.684	3262.4	30	35.1555
10.907	10426.9	3264.65	0.31309	142.82	1472261.1572	204.469	4467.51	135	27.0117
8.879	6592.79	1390.15	0.21085	58.484	905147.041	81.0378	3323.1	49	37.8556
8.832	6746.88	1741.27	0.25808	67.9463	907092.3279	85.9085	3125.5	43	38.9146
9.991	9732.99	3371.16	0.34636	90.0883	1373012.5692	150.533	4112.8	88	34.1113
3.061	9326.77	2718.82	0.2915	94.4541	1315175.0559	138.385	3875.61	23	35.027
3.443	12486.4	3367.95	0.26972	145.294	1686868.5379	171.528	4553.63	70	29.98
2.211	6209.83	2059.9	0.33171	59.6476	862426.5974	89.8761	2685.9	42	40.5673
16.238	7842.12	1895.32	0.24168	82.0514	1042412.9279	107.241	3624.16	13	37.3123
2.793	10537.2	2789.87	0.26476	112.912	1473975.4433	150.883	4358.55	69	33.2879
1.387	6978	2621.71	0.37571	64.2611	1014271.9142	92.1611	3214.82	30	38.8772
8.461	6109.19	1447.7	0.23697	53.1591	840166.3966	73.9997	2872.91	35	40.0791
5.08	8882.48	2941.69	0.33117	97.932	1203145.4947	164.681	3974.38	81	33.3427
19.456	9095.9	2673.38	0.29391	53.7631	1292194.8805	103.669	3614.02	38	37.2169
1.678	8506	2465.44	0.28984	85.0566	1193757.2398	110.205	3912.64	34	34.547
16.7	7685.96	3209.73	0.4176	72.4252	1094516.3605	111.495	3203.68	31	36.0927
11.875	6513.63	1796.77	0.27584	54.6489	884474.5964	84.3464	2387.98	15	42.2284
13.777	8560.43	2261.77	0.26421	62.4025	1199709.9901	95.5332	3222.61	42	37.5415
1.78	13795.4	3600.24	0.26097	149.004	1935946.2236	213.588	5109.77	199	28.2246
0.893	9273.27	2588.57	0.27914	101.486	1274529.3337	156.216	4131.69	73	32.6396
4.902	7129.93	2608.12	0.36579	76.9063	993089.338	103.769	3684.51	40	36.4002
16.391	6181.04	1477.74	0.23907	66.4028	876411.1819	76.2301	3450.2	27	30.8459
1.59	3795.1	1143	0.30117	34.8686	518366.4873	46.6947	1397.18	17	44.3424
2.583	7454.81	2438.41	0.32709	75.2787	1035170.1539	101.67	3738.09	33	36.0898
11.151	4673.06	1862.09	0.39847	43.1314	674218.7277	72.0579	2386.54	53	39.1461
4.386	17247	6250.79	0.36242	206.084	2425906.6954	270.013	4847.66	107	27.1808
1.987	8970.45	2629.38	0.29311	87.3908	1277430.0058	115.287	4072.73	6	33.6723
9.009	6564.13	1624.81	0.24752	57.4446	873295.3994	80.8379	3246.58	59	38.1385
3.156	21577.9	5947.38	0.27562	302.403	2921166.5666	319.444	6597.75	291	18.5451
0.708	12696	2498.61	0.1968	151.194	1730873.4839	197.304	4732.78	146	30.3387
4.195	11382.7	3700.26	0.32507	147.77	1580096.1076	151.066	5123.73	37	28.7474
1.742	11569.6	2089.87	0.18063	151.031	1614799.6485	167.825	4661.41	154	29.3834
6.286	8805.84	2480.66	0.2817	66.0798	1213556.7272	116.269	4428.79	53	35.0919
4.287	11140.8	3406.6	0.30577	94.2935	1574217.3536	144.884	4288.15	102	32.3546
1.622	10202.7	2879.94	0.28227	119.421	1352660.8563	159.821	4120.87	43	33.5264
18.754	9213.68	3383.43	0.36721	65.4987	1256629.1642	126.022	3697.12	62	38.1529
3.171	9930.93	2748.15	0.27672	95.9616	1402084.4482	140.196	3695.24	21	35.6407
2.034	14384.6	5171.32	0.3595	178.398	2008311.1924	248.124	4340.36	43	21.7559
7.503	10044.9	3354.78	0.33397	89.6439	1404589.8144	130.716	3859.28	12	35.8102
1.984	9384.55	2031.35	0.21645	117.984	1304483.0978	120.158	4259.97	55	33.8016
13.439	6025.19	2049.4	0.34013	51.6455	835345.9751	88.6416	3070.48	93	39.1852
7.401	8206.88	2650.62	0.32297	81.1525	1120926.7561	108.142	3756.84	3	36.2897
4.074	18159.6	6344.95	0.34939	255.324	2346777.1403	232.293	15180.75	179	28.4705
7.698	9662.84	3038.71	0.31447	94.9145	1377038.4149	129.64	4204.83	90	31.6174
1.669	12199.7	3437.26	0.28174	153.257	1743463.9969	177.623	4718.67	27	28.7646
6.208	10471.9	3401.74	0.32484	96.5656	1486037.7381	145.895	4411.37	96	31.0597
2.99	10791.5	3052.99	0.2829	130.811	1531994.5777	169.277	4429.36	41	31.6719
10.902	8339.72	1523.67	0.1827	86.1564	1129804.0859	124.632	3932.64	63	36.2929
1.451	3828.53	1124.7	0.29376	33.3415	523319.3628	46.4711	1397.07	17	44.3027
1.99	15281	5064.79	0.33144	211.211	2120215.7032	262.593	5278.93	290	24.5885
18.881	9323.99	4402.41	0.47215	97.1406	1338794.5004	139.375	3999.02	37	33.9092
14.712	12376.1	3541.06	0.28612	66.3791	1721646.9385	153.396	4483.29	89	32.4758
6.314	10826.4	3303.22	0.3051	131.478	1469087.7283	188.549	4201.91	61	30.9324
1.564	13902	3904.31	0.28084	156.21	1935025.8685	236.006	4452.84	82	29.7514
19.08	8425.36	3026.85	0.35925	93.2177	1157892.5345	164.02	4017.39	49	33.3621
0	13134.7	1748.83	0.13314	142.703	1830883.8337	203.031	4895.74	78	27.2623
4.2	9496.66	2742.72	0.2888	91.791	1318652.2486	137.867	3819.66	30	35.5709
8.54	6140.68	2088.96	0.34018	65.0112	824084.4944	91.4673	3489.95	34	37.9225
2.939	11322.4	2888.37	0.2551	146.994	1618807.2586	159.39	4192.49	125	32.2732
12.021	8517.35	3439.32	0.4038	73.9822	1173857.0543	129.482	3159.05	16	38.1951
4.942	10102.4	2477	0.24518	92.2964	1398915.0597	126.537	3822.62	162	35.0108
5.029	6707.3	1653.17	0.24647	63.3675	929339.1686	84.5385	3280.6	23	38.1161
13.618	8312	2256.24	0.27144	89.0265	1171100.6299	110.391	3181.51	61	37.789
18.95	14124.6	5559.24	0.39358	178.952	1912223.3381	288.464	4401.28	84	32.2004
4.03	10382.5	4041.52	0.38926	107.118	1451085.3755	142.777	3803.68	20	35.2683
3.701	9387.41	2813.38	0.29969	84.634	1320017.6591	128.936	3982.68	63	34.4196
4.525	15037.6	4270.74	0.284	202.635	2081575.2751	267.557	5073.15	161	25.1532
0	21427.3	8183.98	0.38194	202.44	2828193.5252	360.797	6136.42	220	22.1892
1.851	9058.41	1892.15	0.20888	96.503	1252400.2838	127.894	3676.58	16	34.2437
18.303	8034.42	2174.08	0.27059	74.8425	1144520.6849	86.0595	2969.38	39	34.2574
12.296	8135.75	3870.28	0.47571	67.72	1202036.8212	119.69	4714.38	51	38.3976
7.195	8614.93	3373.85	0.39162	82.2739	1234108.0567	135.946	3684.28	50	34.7066
2.685	12130	3570.9	0.29438	157.233	1683797.16	183.548	4422.97	26	30.9675
10.245	7368.53	1998.43	0.27121	64.2562	1044850.9877	80.6653	2434.88	82	40.4242
4.295	11099.7	3289.51	0.29636	96.4823	1566679.0632	149.718	4318.09	94	32.4966
18.254	13182	4215.07	0.31975	111.747	1919360.9108	160.596	4877.16	95	32.8005
16.935	8798.79	3320.88	0.37742	73.5174	1188137.4344	139.922	3738.84	48	36.1105
2.576	26901.9	7393.17	0.27481	347.758	3644317.3585	424.542	6442	163	19.0271
13.06	5288.4	1721.95	0.3256	39.3578	747074.2226	66.2583	2780.88	41	42.1213
12.278	4444.76	1744.38	0.39245	39.5706	629088.1601	68.1412	2237.58	33	44.4982
1.698	6774.99	1714.45	0.25305	73.8758	906377.1659	98.6621	3448.7	75	37.8097
0.759	7876.73	2246.89	0.28525	88.2758	1081444.3	114.798	3095.97	21	38.3686
18.134	10171.5	3710.56	0.36479	46.5914	1350978.6573	165.859	4090.83	58	35.3017
4.412	8219.01	2336.08	0.28422	78.7472	1147740.0384	100.908	4147.42	62	34.8397
1.912	6281.09	1349.3	0.21481	67.2415	889080.9602	72.1844	3099.96	14	39.1681
2.283	5915.12	1958.89	0.33116	71.0127	823661.8711	88.7513	3008.37	34	40.236
11.443	7101.31	1745.22	0.24576	59.868	992107.7573	81.7604	3913.79	48	40.2175
14.149	5701.75	816.12	0.14313	56.5951	778681.7721	61.938	2323.81	17	40.8209
3.02	7810.49	1952.74	0.25001	85.4381	1097291.7651	101.764	3866.69	21	36.3192
18.26	11968.1	4586.03	0.38318	76.8	1623024.0938	189.227	5884.12	71	31.1786
13.496	5049.75	949.82	0.18809	41.2957	690622.9283	70.4142	2734.59	27	42.1151
0.595	7848.41	2119.84	0.27009	85.9272	1078877.7176	112.687	3097.54	21	37.6977
1.79	6608.95	1853.25	0.28041	76.1544	885301.3267	94.2768	3501.09	73	38.744
2.627	14776.7	4495.16	0.3042	179.026	2070578.8752	238.053	4449.31	16	29.8758
13.836	6096.83	2423.8	0.39755	52.6408	809718.2561	97.1919	2780.97	61	40.351
1.944	15194.1	4832.21	0.31803	219.472	2101706.4524	250.722	5274.46	288	24.725
15.134	18695.5	5059.4	0.27062	254.656	2583542.75	299.118	5346.67	210	19.5746
12.26	6312.74	1744.54	0.27635	60.8378	857991.1035	76.564	3134.71	28	39.3272
1.068	11084.9	2838.74	0.25609	137.466	1529838.3018	175.361	4640.11	161	28.5941
8.014	4690.63	1607.39	0.34268	44.4388	649987.2614	62.7123	1875.15	35	43.4571
1.926	9503.98	2622.46	0.27593	108.529	1279876.1247	149.962	4092.86	46	33.6152
1.749	5382.99	1876.03	0.34851	49.7174	761067.8228	75.3592	2335.88	19	42.1351
2.314	14643.1	3136.85	0.21422	191.298	2031083.0832	196.538	4049.7	133	32.223
16.249	8190.65	3065.81	0.3743	54.2014	1094100.9588	125.236	4612.79	29	36.9705
4.534	7750.26	1763.91	0.22759	71.2271	1051196.4828	111.208	3429.53	48	35.4187
3.785	5767.01	960.89	0.16661	46.712	794198.1012	61.5715	3053.82	18	39.5367
11.515	3911.74	1232.82	0.31515	33.1588	532414.2028	51.5892	1377.23	30	44.2859
2.232	8559.67	2268.88	0.26506	81.2293	1210528.6824	119.669	3331.53	8	36.4817
2.158	17122.9	5486.66	0.32042	235.003	2322114.5848	270.372	5361.01	122	24.1076
2.337	6507.13	2251.39	0.34598	57.9741	916284.2232	87.2037	2835.6	45	39.416
8.266	5667.15	2066.31	0.36461	46.166	772606.3692	75.213	2036.19	33	43.5279
2.615	6652.98	1761.18	0.26472	68.7839	878493.7223	86.4608	3710.26	70	36.8329
16.389	8159.27	2485.42	0.30461	71.6896	1117497.5514	111.913	3574.08	37	36.5669
16.775	6828.66	2577.39	0.37743	66.8127	978909.0707	95.2255	3898.8	85	39.0256
20.142	13307.5	4729.01	0.35536	137.434	1904029.8738	167.054	4978.54	55	28.2184
1.854	3945.62	1090.64	0.27641	34.3071	562995.0024	47.9543	1773.3	12	43.3287
1.796	8232.42	1612.04	0.19581	74.2207	1159507.8305	104.469	3778.36	20	34.2832
4.301	10598.1	3434.29	0.32404	100.91	1477429.8085	135.213	3678.15	28	35.173
3.21	12460.1	3211.12	0.25771	170.416	1733999.0188	201.432	4779.56	65	28.5857
15.057	9397.53	3020.87	0.32145	57.5895	1327189.0184	120.406	3164.86	22	37.1608
13.868	7750.22	1982.38	0.25578	85.3196	1104477.6155	114.696	3281.08	81	38.0254
3.408	6546.41	1449.09	0.22135	54.9037	913101.4374	67.7836	3248.37	27	39.9997
5.878	10272.5	3228.35	0.31427	103.606	1444740.7997	143.761	4210.14	28	33.446
12.464	7637.29	3193.19	0.4181	68.2643	1081826.1108	116.238	3575.8	58	37.0956
1.677	15160.7	4851.86	0.32002	159.373	2109115.5943	232.219	5340.81	184	26.5125
1.531	9438.24	2076.58	0.22001	108.314	1309036.9062	129.77	4220.36	55	34.0068
4.632	8124.41	2473.54	0.30445	81.6414	1139575.4068	117.811	3809.04	72	34.8119
8.924	6963.5	998.11	0.14333	67.0012	974604.0592	73.6974	2979.19	28	38.979
19.559	14975.9	6027.26	0.40246	111.143	2085048.2721	219.441	5146.88	72	28.9033
2.058	5912.82	2068.69	0.34986	69.9499	821200.0038	88.8558	2987.3	34	39.8224
2.079	6984.8	1761.7	0.25221	73.1977	933291.2864	98.3967	3483.92	79	37.7586
17.98	12546.9	4621.58	0.36834	131.8	1798217.2324	178.341	4445.3	78	27.7064
11.921	6003.05	1910	0.31817	70.8739	842844.9511	81.8418	3411.99	24	38.5655
4.892	5727.89	1560.21	0.27238	56.051	795048.5451	77.3761	2742.43	46	40.2421
14.972	10272.3	4061.19	0.39535	75.9342	1414039.8127	146.728	4430.78	66	34.258
2.578	14651.2	4250.55	0.29011	169.58	2101027.2065	257.189	4923.81	71	27.1765
1.083	8720.62	2532.53	0.2904	102.122	1190412.9802	157.023	4081.17	79	33.5207
0.936	23372.6	5394.91	0.23082	318.199	3217488.966	398.729	6234.09	154	19.8235
2.959	14858.8	3732.08	0.25116	217.843	2060344.4648	244.292	5105.18	142	24.8743
11.107	5261.22	886.82	0.16855	52.7651	718530.9654	62.4016	2348.03	32	41.0007
16.231	7725.48	2546.72	0.32965	74.6927	1075573.554	97.4814	3031.49	22	38.53
5.297	6851.55	1827.27	0.26669	78.3263	929985.8507	97.5071	3382.39	65	37.5723
1.741	8462.66	2163.71	0.25567	87.6591	1193447.3923	101.547	4281.43	35	34.4213
5.635	14851.7	4237.49	0.28532	174.314	2045192.0922	231.662	4958.52	119	29.1472
11.634	7461.37	2754.86	0.36921	76.9673	1072273.1084	121.375	3429.3	69	37.0433
2.027	5768.63	1967.56	0.34107	70.2113	798661.4234	91.1312	2980.75	30	40.4951
3.723	10287.7	2342.38	0.22768	97.081	1459481.57	135.298	3602.09	139	35.9571
14.525	10658.9	3908.75	0.36671	82.2334	1512005.7623	162.849	3663.13	69	35.6189
3.367	12197.4	3215.1	0.26358	136.022	1706287.6911	163.699	4542.05	52	26.3667
10.59	4782.52	949	0.19843	37.0115	674466.457	48.8908	1796.78	39	44.0068
1.95	7195.47	2314.74	0.32169	80.5276	1004843.0934	87.2104	3719.99	34	36.2193
3.266	10854	3899.67	0.35928	105.749	1574561.5521	162.081	4504.57	89	31.3746
12.291	5874.77	1525.28	0.25963	43.2846	804693.8354	90.4548	3218.61	27	41.8922
2.703	9617.3	2600.79	0.27042	91.6718	1346393.704	135.613	3650.29	120	35.7159
1.157	8962.92	2361.2	0.26344	111.578	1237099.611	122.496	3270.34	8	46.5464
1.575	7276.86	1687.48	0.23189	87.5995	1016235.709	104.512	3843.97	24	36.2756
1.186	15117.1	3760.87	0.24878	183.838	2144698.1356	208.076	5667.95	67	23.1595
13.719	6518.87	1334.36	0.20469	57.3745	899764.4456	75.7344	3124.87	29	39.7081
17.395	9107.09	2485.89	0.27296	89.0661	1258468.4949	112.072	4143.9	53	35.2437
2.133	6906.69	2193.41	0.31757	61.0412	931757.8668	98.8003	3113.34	30	40.2006
17.337	7329.22	1529.78	0.20872	70.3024	1002313.0051	86.9146	3727.34	90	35.3856
17.519	16286.5	4345.59	0.26682	188.297	2226961.9793	239.404	5218.57	163	26.4006
3.908	7829.37	2024.19	0.25853	76.5839	1115648.0147	118.459	3298.05	34	38.1053
2.16	15873.3	5154.06	0.32469	148.643	2281032.8767	231.431	6683.4	88	25.0479
12.733	6697.59	1774.72	0.26497	55.8452	909448.2334	86.0015	2636.48	26	37.6933
4.595	7560.4	2514.52	0.33259	63.8161	1000946.3446	115.702	3364.7	35	38.8732
3.948	7004.16	2205.36	0.31486	94.1803	938148.8878	112.46	4138.73	88	34.1332
1.769	8298.63	2543.12	0.30645	85.6459	1170889.7188	138.033	3602.58	14	35.5267
6.968	12946.4	3680.17	0.28426	143.168	1767007.513	192.59	4657.81	63	31.1362
5.264	6395.68	2377.96	0.3718	60.1708	844352.3106	100.714	2888.08	33	39.787
20.624	18206.6	4745.39	0.26064	173.265	2530127.8562	216.696	6074.43	153	21.0271
20.441	9908.15	3662.99	0.36969	108.176	1379816.9162	160.583	4446.83	139	31.9052
6.113	14535.6	6237.32	0.4291	189.449	2104519.9054	289.888	4971.56	115	28.3747
2.313	14549.6	4106.41	0.28223	163.275	2092911.1027	214.064	4781.59	48	46.5464
6.442	17358.8	5624.3	0.324	228.29	2395456.7249	299.179	4848.28	140	26.8966
6.058	6129.56	1611.55	0.26291	64.8801	854311.4437	71.7763	3062.96	24	39.4191
10.16	8013.57	2292.48	0.28607	65.3432	1156366.4323	94.4781	2603.05	56	40.3813
2.064	9784.57	2453.46	0.25074	98.726	1349049.1963	130.621	4296.9	42	33.45
3.452	9545.75	2522.36	0.26423	109.649	1346925.2717	154.146	4186.26	51	33.879
20.536	14123.4	4824.84	0.34162	106.921	1959338.7263	187.983	4689.93	27	35.1625
3.323	21147.9	6112.53	0.28903	244.95	2914716.8787	316.374	5605.99	84	23.0401
6.375	14307.1	4761.23	0.33278	183.923	2004272.3509	238.709	4539.88	36	29.103
14.939	9633.14	2934.78	0.30465	74.9217	1321354.2789	107.343	4526.18	40	32.4777
2.962	8733.3	2502.7	0.28656	97.9567	1233381.8205	118.445	3619.84	92	36.1622
16.081	7097.63	2504.03	0.35279	67.1112	958671.7412	117.374	3439.9	75	37.1196
1.87	8816.23	2458.97	0.27891	81.9783	1230620.9414	106.796	4253.56	61	34.6746
15.269	7006.14	2558.68	0.3652	63.4523	937877.0324	112.076	3298.69	53	38.2657
1.651	6202.55	1952.34	0.31476	59.3272	854667.939	95.2775	2683.41	49	40.6568
1.625	11978.8	3264.59	0.27253	148.947	1714592.5427	165.169	4672.73	27	28.6162
2.302	7185.4	2194.34	0.30538	64.9233	989583.5423	100.924	3192.63	45	40.12
1.645	9701.76	2577.12	0.26563	106.439	1379582.8821	140.867	3938.65	39	33.3499
1.068	6090.15	1297.14	0.21298	58.2729	838846.5602	80.5255	2810.99	17	40.3307
3.534	10037.8	3285.15	0.32727	105.174	1415583.1148	135.173	3719.02	18	35.2048
10.382	3599.83	998.71	0.27743	29.5715	504829.7929	46.4352	1700.71	36	46.0396
14.695	8396.06	2371.38	0.28243	84.3904	1176861.7698	117.025	3151.63	89	37.4435
19.128	9719.25	3110.19	0.32	73.8478	1378817.9898	132.208	4343.06	13	33.3033
1.099	9846.99	2684.44	0.27261	107.91	1346511.8642	159.547	4224.91	78	32.6179
4.525	10767.4	3809.39	0.35378	69.4174	1468596.5361	147.104	3747.07	44	35.1423
5.361	11172.8	3329.33	0.29798	133.524	1536739.445	154.936	4961.25	76	29.9305
1.602	4183.34	1342.69	0.32096	36.2939	572443.6343	52.1729	1444.59	16	44.4883
4.505	8306.28	2569.94	0.30939	66.2457	1158446.5254	107.903	3321.95	37	36.2192
6.681	8095.38	2584.51	0.31925	71.9334	1144000.273	110.456	4040.55	15	35.2636
3.723	11489.7	2763.67	0.24053	130.653	1584520.1682	151.309	3942.12	19	33.3868
2.238	13466.8	4579.02	0.34002	192.685	1841357.4754	245.982	4546	41	29.2577
14.633	9614.22	1611.87	0.16765	90.824	1367701.045	110.838	3989.19	68	34.237
20.794	11876.7	4125.09	0.34732	92.4816	1642876.7941	182.755	4339.91	62	31.6656
1.93	5756.41	1814.3	0.31517	71.0613	793509.0112	87.2464	3047.41	41	40.5684
20.74	16762.2	6647.69	0.39658	129.774	2379042.4393	232.746	7821.03	145	29.9499
12.698	6590.82	2066.31	0.31351	66.6322	927368.7595	82.9868	3342.63	47	38.5937
13.709	9511.54	3051.96	0.32086	96.1996	1312488.3747	135.708	3746.11	92	36.7205
14.224	8152.4	2390.55	0.29323	74.2275	1144639.3679	98.4729	3388.13	33	31.6322
11.962	9067.34	2695.96	0.29732	91.8958	1252184.61	107.061	3731.53	32	36.857
3.351	23148.7	6770.17	0.29246	303.962	3174938.8725	374.145	6392.75	98	17.6748
17.169	9194.37	3776.13	0.4107	67.1036	1270888.2266	136.893	3605.57	62	37.976
16.003	7263.78	2729.16	0.37572	79.4854	997596.3875	116.513	3624.82	66	35.865
3.26	19477.9	7038.13	0.36133	239.873	2698144.7943	331.689	5495.04	87	23.548
15.984	9535	4141.24	0.43431	88.0357	1404334.5141	138.605	3873.33	66	36.9135
1.623	6535.63	2366.02	0.36201	57.7432	905957.5471	98.1186	3523.54	73	36.4269
1.859	14118.6	4283.97	0.30342	177.549	1977894.9427	237.781	5266.72	168	25.4081
18.528	10820.4	4074.16	0.37652	91.9641	1523410.2266	149.439	4205.39	110	32.9744
8.328	10159.9	3370.89	0.33178	94.4377	1445714.7668	141.353	4121.44	96	33.731
2.917	5718.62	1423.52	0.24892	46.27	813637.9523	61.7174	2561.85	18	41.3736
9.553	4982.85	1082.54	0.21725	51.9082	645098.031	57.9701	1955.28	19	43.0329
2.854	5819.05	2353.58	0.40446	34.209	821751.751	82.4912	2723.17	47	42.5807
10.543	16346.8	5805.01	0.35511	131.689	2357175.105	225.543	5281.7	75	25.9041
0.755	10996.4	2621.23	0.23837	138.997	1526296.2358	167.537	4721.52	175	28.4846
0.676	5969.11	834.57	0.13981	48.7699	841461.269	71.2521	2652.31	1	42.3177
12.389	7063.45	1608.75	0.22775	73.222	938710.4831	87.9396	3565.72	99	33.1111
2.388	5293.65	1618.41	0.30572	44.6322	769912.8365	62.6281	2346.67	18	40.3015
11.461	9301.52	1894.17	0.20364	94.8218	1310644.6214	124.932	3821.61	48	33.6091
14.05	23027.3	7072.27	0.30712	313.363	3177080.8309	372.082	6292.28	102	15.228
11.517	4306.96	965.84	0.22425	32.2442	593725.5312	45.8212	1910.64	33	44.5104
2.049	10052.6	2968.9	0.29533	98.069	1415528.9096	136.543	3699.17	124	35.1526
1.28	14894	3790.17	0.25447	178.531	2104681.6484	211.806	5692.91	67	23.0148
6.989	8759.69	1627.85	0.18583	76.6229	1188445.9412	105.526	3768.19	24	38.7522
10.141	10625.9	3563.9	0.33539	108.585	1454492.2281	160.838	4401.91	36	33.4642
2.74	12958.4	3493.28	0.26957	162.594	1798705.2028	211.935	4827.72	50	28.4308
14.03	9856.54	4150.86	0.42112	90.5137	1379653.2793	167.413	4306.6	86	36.1434
1.9	6253.12	2310.44	0.36948	60.9102	869919.1142	89.4148	3583.35	75	37.4572
7.467	6250.79	1699.98	0.27196	56.8189	849627.6953	87.1162	2923.19	30	39.1109
1.456	4646.76	1353.38	0.29125	45.8721	650842.8403	63.4086	2136.08	20	43.5836
7.222	5240.56	2056.84	0.39248	33.0291	738188.3376	71.6019	2523.43	54	44.5704
2.413	8351.82	2458.72	0.29439	96.216	1173313.2681	120.711	3582.77	94	37.0181
2.788	18396.2	5680.46	0.30878	257.954	2480014.6479	308.204	5766.29	306	20.4725
1.459	6573.38	2181.7	0.33189	64.4343	886002.0557	101.496	3100.7	21	40.1543
2.15	6078.68	2116.54	0.34819	55.2984	850639.1588	91.3209	2803.22	45	40.6788
15.992	8077.45	3402.2	0.42119	66.8703	1110429.1164	123.237	4177.19	84	37.2039
15.749	6695.58	2493.04	0.37234	59.1607	909461.5711	102.349	3393.04	33	38.0606
2.957	7930.92	2304.91	0.29062	83.1068	1132025.4033	118.349	3788.34	18	35.0043
18.568	9551.12	2992.58	0.31332	71.2041	1347587.1742	118.796	3783.38	39	33.619
3.746	10199.2	3270.74	0.32068	87.0324	1446909.8538	142.438	3615.12	11	36.7011
12.938	8508.96	2660.52	0.31267	76.2437	1156732.4417	108.329	3934.79	91	31.6397
1.861	13654.3	3758.79	0.27528	189.462	1848112.8658	211.566	4600.74	179	29.2885
11.533	13354.4	4263.56	0.31926	111.106	1858177.1488	174.585	5304.29	73	32.451
2.441	8352.67	2228.65	0.26681	84.0696	1194491.8351	114.882	3302.66	6	37.8971
12.771	9380.67	2674.2	0.28507	75.3992	1339188.0401	98.9648	3506.3	30	34.1366
7.459	12748.1	4547.97	0.35675	182.856	1651009.6395	251.157	5138.51	79	27.9508
18.024	9539.29	4072.96	0.42696	92.5902	1342645.5531	148.442	3989.26	89	34.2695
11.257	5190.83	2077.8	0.40028	35.0916	736414.8675	68.4241	2558.23	39	44.6179
5.16	7842.2	1958.38	0.24972	86.3851	1046844.8855	113.7	3819.95	36	36.386
6.922	10953.5	3681.25	0.33607	77.8638	1520927.1046	156.81	7732.25	12	34.9987
2.992	14248.6	3771.24	0.26467	198.783	1946365.2098	257.45	4880.47	149	25.3981
1.765	6935.18	1858.64	0.268	63.7031	952253.7783	86.4837	3040.46	49	39.8218
2.343	8129.94	2706.73	0.33293	91.336	1154227.7746	107.59	4032.89	25	36.3155
8.398	4656.37	1676.58	0.36006	38.1194	658859.8047	65.8352	2526.26	43	42.7422
2.182	9125.24	2076.25	0.22752	85.8192	1294567.2439	110.187	4667.44	28	33.1617
14.537	8506.7	2913.6	0.3425	36.9261	1166889.7327	123.38	3917.31	40	37.1718
2.59	7825.68	3113.91	0.3979	77.6324	1096946.3043	119.703	3293.93	39	37.7319
12.273	6108.3	1749.83	0.28646	71.4128	839177.6501	89.6949	2867.29	18	38.6551
14.797	5800.94	1898.93	0.32734	53.5386	794389.0948	86.558	2396.8	94	41.4551
1.787	9187.14	2848.16	0.31001	86.1419	1231157.611	145.224	4043.83	34	34.8849
0.625	7837.64	1988.49	0.25371	84.715	1094896.8482	129.578	3141.9	4	37.4335
10.785	4935.15	1790.08	0.36272	34.712	687850.4103	68.0309	2818.01	46	42.0968
15.257	7131.17	1718.36	0.24096	56.4327	973793.5836	93.4859	3208.27	33	37.8968
13.11	7211.26	2795.88	0.38771	77.7981	1020460.8199	132.806	2831.97	45	38.5815
12.923	15286.4	5247.7	0.34329	156.877	2199510.0214	239.715	5586.54	151	24.5921
15.936	8992.29	3448.08	0.38344	97.9145	1256943.944	126.769	3366.34	68	36.0416
2.035	5832.24	1612.22	0.27643	54.1867	813511.7246	92.2792	2727.19	87	40.2515
4.162	7695.48	2782.21	0.36153	61.925	1053616.7607	95.6886	3360.16	43	37.8684
4.836	6383.93	1228.54	0.19244	55.0556	895224.7005	65.7043	3058.76	19	39.5791
11.709	5776.58	1650.69	0.28575	38.8613	790742.2674	97.6315	3180.48	25	42.508
2.677	13796.5	5033.27	0.36482	130.365	1933881.8005	214.001	4679.23	61	27.8314
1.823	8618.7	2136.07	0.24784	87.1449	1185539.5874	142.282	3198.85	11	36.7779
0.797	12224.4	2234.41	0.18278	152.676	1658894.1369	187.806	4882.98	140	29.9201
3.428	7433.66	2203.75	0.29645	69.5579	1014690.3457	107.776	3354.48	77	37.1877
9.4	17009.8	5405.59	0.31779	170.838	2320307.106	222.433	5576.75	120	24.5892
15.401	7657.1	2236.54	0.29208	68.8315	1078557.4322	97.8298	2891.73	36	39.071
20.703	17361.5	6298.22	0.36276	182.21	2431786.9863	250.407	6006.36	135	24.9783
1.469	4066.38	1175.19	0.289	31.3757	555841.7744	49.8146	1408.75	17	44.2712
0	10825.5	3264.61	0.30156	124.847	1502580.8629	149.595	4400.53	39	32.5534
3.23	12804.9	3717.76	0.29033	133.769	1768307.2645	163.997	4731.93	56	28.2196
1.045	8357.05	1550.51	0.18553	77.435	1193718.4234	96.195	3949.9	14	36.1294
2.247	9567.75	3370.09	0.35223	92.8058	1343504.1635	150.489	3814.52	79	35.5643
14.218	6310.32	1699.29	0.26928	34.9153	788935.8424	93.7243	2928.53	40	40.404
14.542	11482.4	4693.49	0.40875	106.001	1565151.956	186.198	3978.56	80	35.4746
2.749	13218.3	3982.56	0.30129	158.494	1909144.9293	214.584	4654.48	54	29.5559
19.784	10974.3	4881.72	0.44483	90.7694	1477793.4213	162.093	6357.26	70	36.1651
2.375	13170.5	3292.64	0.25	169.446	1836218.8223	211.245	4997.59	184	27.9261
4.905	9642.01	3061.19	0.31748	93.565	1369194.3466	134.922	4061.82	107	33.1917
17.669	12131	3841.8	0.31669	93.9659	1676709.2776	165.077	5385.49	105	32.9315
3.77	7544.26	1956.06	0.25927	89.106	1021723.8758	119.413	3576.25	39	35.5648
1.352	8735.76	2223.56	0.25453	89.9902	1226820.4475	133.92	4124.75	170	32.573
20.376	11197.9	4369.09	0.39017	78.5252	1584870.209	165.43	5196.35	61	34.0411
12.482	10336.3	3660.02	0.35409	96.4215	1473978.769	175.195	4318.92	98	32.896
5.093	13958.6	4562.33	0.32684	146.497	1924855.7367	200.363	4993.39	123	27.9486
1.557	15489.8	5432.76	0.35073	184.414	2152730.4035	253.764	4592.46	37	25.1283
2.513	17747.7	4843.8	0.27292	229.735	2469995.7016	277.015	5718.5	202	21.8964
4.106	8286.21	2341.84	0.28261	65.6894	1109816.3007	100.525	3572.03	24	36.8464
6.641	9410.52	1725.12	0.18331	94.122	1293435.9554	107.29	4153.11	60	36.3965
19.203	11806.5	5379.03	0.45559	160.661	1618337.1378	270.171	5024.92	148	27.2742
16.014	10058.8	2300.52	0.2287	88.2436	1413277.4304	127.553	4121.94	81	33.164
6.856	19370.4	7552.2	0.38988	153.056	2656883.2731	330.525	12912.15	52	34.5308
3.894	10536.1	2468.96	0.23433	105.694	1485382.7065	150.191	4435.38	71	33.1865
16.323	10072.1	3801.1	0.37738	94.4297	1373403.0193	131.87	4369.63	38	36.6129
2.676	9335.18	3437.49	0.36822	84.0985	1295463.1822	133.217	3766.92	121	34.6888
14.37	9060.33	3194.19	0.35254	93.2377	1251254.7954	114.531	3958.01	20	35.6881
15.134	13539.4	4487.44	0.33143	173.277	1925222.0396	237.826	5129.11	66	25.9015
9.162	6645.96	1809.55	0.27227	69.5862	927796.5301	84.9156	2915.56	75	39.2326
1.555	10102.1	2999.79	0.29694	126.201	1396576.3062	167.73	4652.24	76	29.8578
15.491	9365.55	3739.09	0.39923	86.9882	1299338.9431	154.867	3784.32	18	35.9567
1.024	7044.61	2776.25	0.39409	64.0054	1029221.82	99.7137	3227.42	28	38.8629
6.074	8331.58	3737.49	0.44859	79.2888	1171980.5305	140.001	3553.85	47	37.6998
1.651	9716.11	2142.14	0.22047	108.271	1351238.7225	134.005	4215.75	53	34.0443
8.337	3836.91	1248.06	0.32527	31.2721	543050.5243	49.9264	1947.91	64	44.8434
3.044	14500.1	4752.12	0.32773	156.642	2013288.3664	202.558	5072.47	79	27.0708
1.477	4978.46	1736.61	0.34882	49.6151	696637.2334	71.65	2177.75	29	42.932
5.341	13743.6	4859.59	0.35358	163.032	1907697.4187	202.263	4982.14	84	27.6486
11.249	4670.89	1866.32	0.39956	46.7282	686984.9356	66.6405	2334.29	57	43.1816
13.732	6990.33	2064.54	0.29534	63.2512	987295.1491	103.594	3352.18	33	38.2118
2.673	9109.13	3488.92	0.38301	90.8499	1190425.7925	151.535	3683.83	54	35.7812
17.927	8097.82	2300.45	0.28408	67.132	1128480.2698	91.0345	3527.68	37	36.7983
6.975	14439.2	4925.69	0.34113	163.541	2096666.9362	230.751	4783.95	60	29.1497
0	14170.9	4176.17	0.2947	172.15	1960211.091	211.025	4780.85	78	46.5464
13.493	6958.85	1695.15	0.24359	63.2945	975397.0934	78.5172	2934.85	33	39.3618
1.692	15372.2	4178.01	0.27178	187.712	2176388.1096	220.239	5689.32	64	23.127
1.791	7739.17	1979.66	0.25579	88.0217	1087290.0102	109.093	3884.18	20	35.5217
1.616	6088.22	1872.52	0.30756	68.6115	847109.2305	91.096	3037.17	34	40.1887
15.161	6034.69	1988.49	0.3295	85.654	842669.2003	117.816	3400.06	83	35.3546
1.583	13077.1	3790.16	0.28983	156.018	1825454.2052	234.606	4334.78	88	30.5491
12.554	8041.23	2676.72	0.33287	68.859	1080809.7946	104.818	4043.47	65	37.0119
4.139	10363.6	2083.95	0.20108	87.8054	1447825.0197	122.871	3988.78	156	31.8885
5.098	5792.54	1526.02	0.26344	56.4898	752204.3454	77.811	2966.91	36	39.4497
15.847	8065.92	2529.96	0.31366	65.5832	1135244.9835	105.796	3106.88	104	35.7778
12.043	9083.7	2383.33	0.26237	76.6683	1242085.3898	93.4239	3548.35	37	38.4931
5.504	34139.5	12717.8	0.37252	212.28	4729548.7047	525.076	8834.52	171	25.4176
1.662	12124.4	2490.09	0.20537	149.022	1689278.4011	175.783	4647.98	144	29.7537
1.648	8095.05	1743.51	0.21537	98.407	1112828.1876	111.09	3334.74	114	34.9575
17.06	8986.12	3181.4	0.35403	66.629	1283633.7979	127.613	4683.62	67	37.8004
8.727	18509.7	5638.02	0.30459	205.425	2550532.6609	289.562	6220.54	251	20.6565
1.933	9965.16	2988.28	0.29987	100.845	1362244.0971	151.349	4088.02	118	32.8819
12.799	8904.8	3130.4	0.35154	92.4014	1260058.2575	110.167	3824.86	33	34.8929
4.449	8993.02	3421.63	0.38047	92.0166	1263358.769	131.934	3591.33	38	35.8413
4.017	7038.73	2293.09	0.32578	70.7471	951757.8034	114.905	3267.06	72	36.608
19.512	13593.7	3418.63	0.25148	184.185	1863053.4979	227.396	5207.49	181	25.1831
18.85	14275.3	3457.63	0.24221	140.921	1954956.1343	206.322	3863.03	137	33.3164
2.811	7829.75	2728.31	0.34845	70.037	1077650.4756	107.08	3202.16	21	38.1535
6.903	10789.2	4473.08	0.41458	132.353	1466941.5265	211.387	4494.44	179	30.7207
0.606	9404.36	2398.83	0.25507	102.3	1329943.7779	156.45	3820.67	15	34.1145
1.961	8711.16	1978.29	0.22709	102.9	1186366.2896	135.941	3995.81	40	34.0587
7.851	4119.53	1078.68	0.26184	29.9103	576107.5873	46.1489	2077.77	49	44.0985
12.132	4977.72	1587.07	0.31883	33.8	695671.0135	60.2043	2114.19	32	43.7673
5.628	7332.93	1921.06	0.26197	68.4368	1015218.7357	97.675	3184.36	38	37.8357
14.495	6631.52	1565.38	0.23605	61.1312	943412.4051	75.4482	3264.46	40	40.6895
2.555	9585.46	2373.55	0.24761	116.396	1317024.2239	136.911	4149.27	126	32.902
3.499	11863.5	3118.93	0.2629	166.833	1640180.9457	205.208	4764.38	66	26.5181
20.618	21699.1	6471.9	0.29825	179.874	2993627.9891	263.196	6364.6	149	20.4899
3.664	11922.2	3574.2	0.29979	151.486	1667984.1338	156.284	5208.61	32	27.4662
9.227	10836	2678.23	0.24716	90.8235	1489272.2335	133.813	5009	48	32.3216
16.493	6696.81	1923.89	0.28728	64.6127	837549.3879	96.5893	3208.85	25	38.1899
15.812	10352.2	4319.95	0.41729	74.4438	1435148.8401	162.27	7261.9	24	40.8969
2.192	8637.81	2205.94	0.25538	91.2878	1169544.8068	113.239	3743.17	32	35.3555
5.522	14101.6	4217.36	0.29906	148.657	1924250.3273	214.275	5348.05	10	30.9911
3.295	12574.2	3519.78	0.27992	135.578	1707486.6719	166.787	4050.66	193	31.8469
3.405	12096.3	3399.99	0.28107	171.389	1679761.9242	196.266	4782.04	67	27.3387
17.253	10462	4252.51	0.40647	61.8282	1368128.2502	174.213	3928.49	77	35.1218
0.63	9328.25	2508.39	0.2689	94.5896	1279099.9592	155.497	4099.67	79	33.1646
7.054	14696.3	6035.47	0.41067	199.315	1940654.3099	270.692	5188.22	68	27.0097
18.974	11650.1	4462.79	0.38306	121.831	1700092.6919	193.382	5081.5	78	28.4898
14.621	9038.77	3814.28	0.42199	77.6386	1229317.8732	139.561	3685.61	30	34.3715
5.971	11217.8	2973.61	0.26507	116.17	1587545.1384	149.645	4406.29	74	33.1811
17.507	11647.2	3629.24	0.31159	131.889	1555924.564	191.013	4539.68	143	31.0468
16.369	8713.56	2362.39	0.27111	94.5414	1236788.2441	116.506	3450.53	99	36.9503
15.24	13415.8	4557.71	0.33972	111.643	1951525.5281	184.82	4884.59	95	33.6917
1.886	13761.7	3084.89	0.22416	172.274	1874385.6006	211.745	4760.79	106	28.6021
15.941	7287.05	1893.42	0.25983	69.1407	1000305.853	110.565	3339.48	91	38.0338
13.168	4860.14	1183.78	0.24356	41.7873	666302.398	73.7034	2800.25	27	41.4505
14.227	5791.02	2469.65	0.42646	52.6563	794920.6975	94.8544	2504.56	79	41.1033
16.366	9702.38	3745.64	0.38605	91.6188	1368046.8355	146.634	3371.23	72	34.8966
1.5	6793.19	2195.63	0.32321	71.7519	935026.4805	96.0994	3717.01	29	36.3843
15.944	7175.32	3046.09	0.42452	72.4351	966938.5099	126.425	3214.36	67	38.1002
2.538	11360.7	2857.47	0.25152	144.699	1605595.0217	152.009	4148.02	122	32.2831
4.082	16196.3	4710.29	0.29082	233.942	2282791.1111	289.997	5633.43	123	21.6545
1.898	7803.06	1610.31	0.20636	79.5045	1091583.6475	106.922	3767.03	14	33.6765
15.444	8673.48	3947.35	0.4551	88.5579	1133265.3047	154.581	3452.38	56	36.6217
15.705	8661.32	3359.39	0.38786	74.9408	1195985.2506	136.03	3260.9	22	35.4669
2.573	8457	2298.06	0.27173	92.4137	1183759.3477	106.691	4061.37	25	36.8341
2.913	9529.47	3308.53	0.34718	104.324	1332997.6253	138.649	3690.76	20	35.6887
2.853	7697.67	3157.88	0.41023	78.4308	1076035.0469	125.175	3251.01	36	36.8626
1.778	8812.84	2303.8	0.26141	87.9201	1251141.5621	120.195	3997.36	6	33.9089
3.153	20936.9	8064.71	0.38519	187.202	2893517.6015	375.491	15482.05	141	27.2533
16.674	8262.32	4085.51	0.49447	79.6946	1137209.4015	151.677	3702.92	77	34.6961
1.492	11001.1	3262.62	0.29657	132.741	1549370.3128	179.612	4225.98	54	32.5075
0.906	8828.78	2684.95	0.30411	90.7003	1233537.1673	122.468	3195.14	22	37.7103
1.642	6220.32	2235.31	0.35935	68.5677	848165.2513	102.468	3024.13	47	40.302
16.31	9580.52	3446.84	0.35977	84.2779	1302261.543	133.231	4487.61	39	32.9018
10.184	8871.63	2603.64	0.29347	82.1144	1247627.5739	117.405	4246.27	40	33.5778
13.787	5402.41	2360.86	0.437	50.1116	757860.455	95.0952	2204.43	68	42.1964
1.75	13285.6	3877.38	0.29184	170.431	1851351.4934	225.984	4319.04	79	30.9525
0.6	7914.59	2179.61	0.27539	88.8108	1085437.1583	111.92	3099.92	21	37.6867
17.628	9273.59	3440.39	0.37098	70.4987	1287117.4322	136.872	3850.03	111	35.8733
13.794	9412.9	4222.96	0.44863	64.3116	1396225.5393	131.003	4266.45	70	38.9345
1.939	7359.75	2300.84	0.31262	77.3709	1017798.1518	96.4097	3737.23	36	36.2749
8.874	8777.11	2295.5	0.26153	71.0755	1240308.3644	100.935	3287.36	16	37.7525
2.996	10480.9	3265.34	0.31155	98.1669	1450251.4874	136.65	3687.59	28	36.8384
19.725	9706.27	4261.65	0.43906	69.6876	1346403.196	163.676	6600.18	77	31.7301
5.206	8164.69	2354.77	0.2884	92.5553	1150399.0711	118.226	3990.5	119	31.2104
1.68	4183.73	1256.66	0.30036	36.4069	569686.414	52.8901	1400.41	17	44.4069
7.284	3977.04	1594.33	0.40088	26.1914	544388.7614	51.7183	1979.18	3	44.001
18.45	9467.02	3175.58	0.33543	70.7285	1366557.6647	120.114	3496.97	96	36.6985
1.808	5383.18	1137.85	0.21137	50.7951	771658.0868	70.5515	2873.42	58	40.2026
12.349	6063.36	1435.24	0.2367	67.5376	824991.0499	79.0348	3375.25	49	37.8983
2.495	13776.2	4356.56	0.31623	185.116	1841710.3128	235.99	5125.98	214	26.1505
1.417	22179.1	6522.98	0.2941	291.358	3001379.524	331.452	6662.5	287	18.6908
1.881	16915.3	6023.77	0.35611	154.049	2425246.0259	268.694	5980.75	71	24.0555
19.998	8019.27	3273.44	0.40819	69.1938	1114984.3201	118.666	3413.91	129	36.7953
18.074	10757.9	3272.9	0.30423	103.523	1551310.3121	155.849	4234.3	159	29.5805
11.498	13852.1	5092.9	0.36766	165.301	1943026.9162	214.583	4945.5	149	27.7303
2.999	12562.3	4197.58	0.33414	134.796	1760109.7373	187.03	4256.72	41	31.9468
13.43	7674.18	3075.1	0.4007	58.1026	1069378.0163	109.923	3924.37	63	36.8735
15.095	8551.47	2193.58	0.25651	85.3349	1213694.7861	123.633	3693.05	94	36.5378
4.711	13347.9	4294.44	0.32173	108.316	1848435.3634	190.456	4389.17	37	31.9293
2.273	9172.54	3185.5	0.34728	106.644	1284427.4321	130.839	3665.72	10	34.8492
1.805	8385.79	2130.02	0.254	84.5367	1201392.4894	119.032	3890.1	12	34.3939
9.57	7328.2	2012.32	0.27459	57.4772	1036045.6158	98.8065	3045.74	45	38.5642
5.168	13508.4	3938.85	0.29158	149.626	1905570.7374	202.407	4744.69	88	29.0578
19.679	12824.9	4350.39	0.33921	134.769	1750997.09	193.717	3941.03	55	33.9147
16.713	13810.2	4476.47	0.32414	136.222	1850762.2975	180.101	4909.44	180	28.5294
7.454	18804.4	5833.92	0.31024	184.114	2588111.1796	255.074	6537.29	100	20.0722
0.962	11575.9	2348.21	0.20285	148.792	1623866.2426	180.732	4611.04	54	29.9508
1.3	7180.7	2667.59	0.37149	63.0736	1046751.2091	94.8793	3205	30	39.5931
4.362	9947.53	3065.35	0.30815	106.782	1392618.2234	173.182	4256.8	55	32.9639
6.523	17075	5305.09	0.31069	255.288	2360889.1403	347.282	5889.04	277	16.2175
1.837	4036.35	1394.13	0.34539	37.1703	566039.4556	54.7453	1823.61	16	44.3178
1.376	21664.5	6213.37	0.28679	308.088	2967712.2272	310.028	6589.69	285	18.6529
3.744	11330.2	2561.86	0.2261	95.8359	1507217.9758	174.306	3883.82	96	33.266
3.73	5873.27	1767.93	0.30101	52.8677	784094.3936	89.4221	2570.66	52	41.0533
13.46	15717.1	5549.85	0.3531	102.4	2176984.4552	217.108	5079.25	24	29.026
14.688	8530.5	3428.62	0.40192	67.2955	1227154.7188	120.617	3210.98	51	38.2044
4.565	11018.7	2944.99	0.26727	114.27	1527776.0692	144.472	3880.21	83	34.8346
2.232	3904.15	1023.75	0.26222	34.4942	556904.2573	45.7324	1781.92	12	44.505
0.587	6208.41	833.7	0.13428	46.3859	880256.2132	74.018	2751.33	1	42.0181
2.412	16540.6	5430.24	0.32829	208.067	2177268.0657	265.056	6060.78	255	21.7068
1.72	11584.2	2773.02	0.23937	147.128	1565484.4535	175.194	4547.87	57	30.4279
4.082	11833.9	3633.69	0.30705	105.125	1623917.6966	167.879	4588.86	18	36.2511
2.496	5337.44	1481.27	0.27752	47.6854	740411.917	58.9327	2012.99	18	43.3043
11.454	6461.36	1524.08	0.23587	55.4989	906501.9952	86.7505	3156.64	8	39.1729
11.691	12510.8	4502.71	0.3599	153.982	1770489.2335	215.61	4985.85	27	29.6104
11.443	7835.85	2467.94	0.31495	67.9597	1128266.6854	100.561	2817.22	79	39.82
3.395	12248.2	3125.54	0.25518	161.435	1682373.0386	209.225	4778.87	65	28.8207
2.838	9379.53	2106.92	0.22462	104.108	1303098.1408	117.782	4023.34	56	34.8721
13.209	5078.62	1759.17	0.34638	43.7723	708844.804	58.5043	3150.14	74	41.1957
19.987	16422.2	5364.38	0.32665	188.198	2289441.7694	240.371	5065.51	128	27.4173
1.574	7663.26	1680.44	0.21928	88.5794	1070970.7955	105.574	3873.36	19	35.5294
4.791	17104.6	4968.63	0.29048	236.206	2354672.485	296.499	5248.13	191	25.5721
17.522	7977.27	2203.22	0.27618	71.6028	1119330.134	105.239	3184.99	35	37.9116
6.834	4421.83	1344.1	0.30396	31.6837	620921.1357	52.7993	2230.63	56	43.4142
6.693	11494.1	4768.14	0.41483	85.4195	1585500.192	180.618	4180.3	95	32.632
13.047	6399.43	1116.17	0.17441	52.5645	890026.0945	71.7022	2891.38	47	37.9132
3.157	14500.3	3082.69	0.21259	183.281	2028577.8164	223.92	4889.58	83	27.4388
0.529	11746.3	2333.97	0.19869	150.917	1600143.4388	191.3	4817.11	143	29.8585
14.911	8939.53	2645.34	0.29591	75.9855	1205858.6679	115.723	3327.2	109	36.865
18.57	7713.52	1710.46	0.22174	84.0591	1089509.4249	120.254	3588.87	96	38.3318
4.254	7768.61	2085.83	0.26849	55.2074	1024281.0199	100.591	3235.42	48	38.4542
1.687	8357.59	1886.89	0.22576	89.1413	1175288.6467	107.757	3909.69	40	34.3903
1.551	13697.6	3380.71	0.24681	186.683	1871411.8336	210.376	4586.44	177	29.0576
12.247	5752.82	1454.01	0.25274	41.1821	781150.7264	88.6349	3434.29	31	39.5338
2.563	17507.3	5104.79	0.29158	224.469	2427592.1954	281.121	5785.31	201	21.6859
17.555	17588.8	5473.93	0.31121	201.299	2537703.5723	282.558	5205.86	258	21.8786
1.808	13827.6	3684.42	0.26645	198.198	1890466.4037	207.486	4577.16	174	29.2725
2.249	8458.65	2463.57	0.29124	92.9328	1181808.8035	120.998	3628.98	93	30.6827
2.012	17191.6	4956.49	0.2883	228.972	2404987.373	282.379	5720	193	21.9818
16.155	10417.4	3823.37	0.36701	97.8834	1464052.1826	140.378	3796.38	50	37.2654
18.994	10027.3	3798.65	0.37883	67.0119	1439907.042	138.401	4514.36	83	35.7365
10.94	10301.2	4034.2	0.39162	38.1603	1420586.0631	141.499	4138.21	66	35.6157
1.906	13195	4212.83	0.31927	146.405	1887849.6936	209.033	5843.95	88	24.3253
16.51	7480.81	2652.79	0.35461	58.6864	1011465.6109	110.399	3986.62	60	36.7165
2.468	12388.8	3361.19	0.2713	153.109	1728667.8085	202.663	4825.94	56	28.5022
2.557	15380.8	5017.85	0.32624	222.556	2111834.5735	254.669	5328.11	270	24.8694
3.721	5965.71	1321.74	0.22155	54.9128	858936.713	70.5442	2446.55	65	41.831
0.75	4813.16	1007.35	0.20929	46.6613	686311.7926	57.9128	2184.35	80	42.8044
11.622	11836.6	3549.4	0.29986	119.153	1697505.0901	188.499	4330.91	51	32.1812
14.816	7529.55	3050.18	0.40509	64.9277	1088473.246	99.8552	3888.28	75	37.7875
14.411	6687.08	2258.42	0.33772	88.6754	895258.2083	112.625	3292.91	85	40.0209
1.582	11792.9	3071.89	0.26048	119.657	1634009.0098	180.501	4079.39	72	32.2015
2.991	7577.9	2745.12	0.36225	79.9459	1038530.5396	94.8561	3363.99	58	37.7573
11.563	8643.11	2877.3	0.3329	98.7253	1216709.9291	128.228	3489.62	94	36.5788
16.919	8422.88	2523.35	0.29958	83.7488	1157370.1873	109.786	3838.73	46	35.7066
3.05	9068.27	1995.18	0.22001	96.7449	1281607.0094	130.622	3854.62	48	34.9438
2.072	9374.8	2769.96	0.29546	87.3136	1316547.5379	142.614	3904.56	9	35.1859
12.08	4610.4	1854.25	0.40218	23.6774	629544.9286	66.4917	1887.11	32	43.3497
2.509	9084.09	3236.35	0.35626	118.126	1191996.4236	189.166	4345.58	189	31.5205
18.838	13887.5	5110.77	0.36801	176.544	1908054.5771	247.485	4777.37	146	28.1754
5.844	10857.3	2408.88	0.22186	102.705	1519998.5463	146.903	3950.21	120	36.2299
1.978	11530	2756.56	0.23907	154.486	1586073.4426	185.11	3987.98	68	32.3373
2.85	6974.4	2166.64	0.31065	53.5844	909426.5389	115.196	5778.44	21	37.722
4.974	14490.7	5295.28	0.36542	192.774	1892842.8486	260.051	5214.4	70	26.8022
16.251	25889.1	11787.1	0.45529	204.159	3392471.4415	470.897	16477.11	133	29.083
4.804	4886.82	780.94	0.1598	44.0644	654731.707	60.8439	2629.26	12	43.1047
7.75	5161.79	1630.3	0.31584	41.0721	722949.5934	67.8193	2732.95	60	40.5166
12.228	4998.28	1079.98	0.21607	47.0241	648649.0732	65.347	2032.98	21	43.2944
14.849	8233.17	2497.83	0.30338	92.9123	1139048.8625	123.322	4091.43	136	34.4446
17.803	9966.57	4291.59	0.43059	108.96	1348245.0233	148.795	4328.81	106	33.866
1.882	9210.06	2080.25	0.22586	101.005	1257943.6218	147.706	4006.4	36	34.1406
0.818	9832.2	2775.98	0.28233	108.4	1349186.9852	155.13	4137.41	79	33.2062
12.367	6019.78	2198.21	0.36516	35.2168	815205.95	97.885	2173.04	16	42.4613
3.366	12440.5	3322.89	0.2671	155.933	1774689.0906	171.353	4697.23	44	29.0777
13.724	7819.81	2117.8	0.27082	53.0749	1064782.2454	108.858	2773.22	36	40.9719
2.182	6151.78	1529.05	0.24855	52.374	858793.5101	73.5477	3319.1	56	39.3326
7.204	5766.74	1806.69	0.31329	54.754	790849.6739	76.4333	3154.9	10	39.3934
6.795	8350.49	2825.08	0.33831	75.8711	1157159.6133	103.462	3936.92	17	37.9561
15.322	7632.29	2962.93	0.3882	63.5214	1045642.3925	121.653	3261.28	67	38.4193
1.713	7332.18	2408.09	0.32842	65.5759	990369.4337	98.94	3128.92	17	40.0643
16.963	7231.17	3622.55	0.50096	58.0247	993591.7002	117.573	4029.41	50	36.1005
1.943	8392.06	2273.23	0.27087	87.7983	1195872.4287	113.765	3552.18	97	36.8136
0	10734	2087.39	0.19446	143.246	1489002.2352	185.299	4650.89	51	46.5464
18.812	10925.2	3632.16	0.33245	95.9555	1479979.1494	142.9	5119.06	53	46.5464
10.081	6126.72	1615.3	0.26364	59.0217	879000.6654	83.4563	2391.96	27	40.7815
16.181	14052.6	4276.54	0.30432	159.01	1926571.2925	216.903	5218.85	12	30.8756
10.532	10081.4	3537.68	0.35091	97.2272	1418676.6968	132.943	3524.62	43	34.6822
14.207	7317.84	2972.43	0.40618	70.4369	1049599.8702	110.318	2869.76	87	39.325
4.203	19851.8	6655.01	0.33523	256.019	2784529.2672	324.561	5440.88	89	23.6099
16.122	5507.86	1570.72	0.28517	53.4941	743417.7107	85.3964	2449.24	48	41.8545
4.465	10440.8	3856.9	0.3694	84.9649	1417552.6766	165.083	4734.95	39	32.1872
4.07	5811.82	1053.23	0.18122	52.5591	799977.1539	65.2332	3034.98	24	39.7659
4.543	11700.3	3677.34	0.31429	76.335	1554444.5914	144.659	4005.71	130	32.3393
4.296	12177	4646.19	0.38155	123.715	1745918.615	184.232	4859.86	137	29.3441
7.703	7823.98	2540.21	0.32466	86.8018	1102370.5305	103.857	3482.71	26	35.4641
15.33	7222.2	1750.77	0.24241	64.1083	1014223.8541	89.4892	3296.03	9	37.8068
3.374	13484.5	4558.04	0.33802	161.142	1854907.9044	197.073	5119.61	69	26.769
18.733	10474.1	3832.64	0.36591	75.3607	1444949.0902	144.93	4488.04	65	32.7866
16.594	14694.1	5825.14	0.39642	183.938	2008067.1278	290.727	4588.12	133	28.4703
2.242	3960.46	1084.65	0.27386	31.8501	538428.5344	45.4952	1390.95	17	44.14
2.144	5190.51	1107.88	0.21344	45.9636	730341.2905	63.3473	2763.65	15	41.5043
20.544	4751.31	1378.21	0.29006	45.1035	684940.5007	59.8135	2310.36	35	46.5464
3.967	10209.3	3160.08	0.30952	118.194	1436839.663	161.018	4254.72	50	33.5394
10.546	7438.65	2839.6	0.38173	90.2165	1040950.2207	115.345	3520.24	45	38.1437
3.389	12460.3	3141.37	0.25211	125.108	1683679.3187	155.939	4079.24	227	32.123
1.637	15043.3	2920.75	0.19415	185.285	2104156.7683	226.235	4699.67	32	46.5464
3.432	7864.63	2403.12	0.30556	73.2899	1065478.7375	112.935	3436.9	73	35.8993
16.469	9450.93	2527.1	0.26739	94.7967	1275612.0983	92.5851	4103.1	31	35.6381
11.205	3775.79	1176.86	0.31168	33.9678	514195.1758	48.5693	1339.44	24	44.6292
3.718	10427.8	3225.76	0.30934	105.113	1489322.4934	144.491	4364.02	70	31.8603
2.647	4734.81	850.11	0.17954	45.421	640811.0658	65.8734	2710.2	13	42.9014
15.322	7135.54	2541.89	0.35622	60.2668	924634.13	113.87	3540.6	5	38.0204
12.219	7736.42	2034.33	0.26295	76.6182	1054065.0458	98.6437	3529.28	37	35.4491
14.358	8049.68	1725.84	0.21439	83.5447	1145734.927	109.946	3771.37	100	30.367
0	11734.9	2274.54	0.19382	135.096	1588899.2254	194.426	4791.5	29	29.826
1.525	5094.89	1978.2	0.38827	34.2611	722154.3795	64.6469	2605.56	38	44.1626
2.511	16584.3	5343.16	0.32218	212.163	2188857.0968	255.352	6190.27	255	21.4536
1.764	12709.1	2461.47	0.19367	160.595	1726253.6612	210.505	4686.85	96	29.0729
14.619	5943.87	1815.53	0.30544	57.1935	847872.5038	74.3096	2498.79	68	41.6172
5.877	7926.67	2113.08	0.26657	66.0357	1152789.4975	81.1029	2685.4	34	39.578
9.641	13872.6	4454.72	0.32111	151.724	1898479.6178	210.556	5160.83	14	30.6207
2.41	4964.18	1508.44	0.30386	44.3075	690984.619	60.4533	1872.73	19	43.8882
0.954	11313.6	2364.57	0.209	146.726	1597840.6642	177.782	4613.87	54	29.9249
17.357	9086.77	3286.76	0.3617	90.5828	1204900.9584	146.939	4037.27	26	34.0115
15.728	8871.36	2555.33	0.28804	57.7497	1238499.9909	102.097	3534.01	61	38.2055
1.317	8037.48	2065.53	0.25698	86.7527	1133441.8368	108.055	3977.59	50	35.2221
17.107	15358.5	3988.62	0.2597	169.181	2157959.2394	206.034	5492.76	239	23.5501
4.281	10590.2	3370.5	0.31826	131.392	1449738.596	154.27	4894.81	72	29.2047
2.461	9497.4	2588.91	0.27259	105.995	1349400.994	142.347	4229.35	44	33.4105
4.831	8164.44	2611.17	0.31982	75.6317	1122747.0921	116.504	3956.75	88	37.756
2.155	11158.3	2964.38	0.26566	132.539	1531101.4725	161.551	4422.34	91	31.4741
12.192	4815.29	1190.8	0.24729	39.2321	641896.1502	66.9865	1607.33	18	43.8308
17.878	10392.1	3960.06	0.38106	76.9708	1441601.7037	150.915	4699.98	107	31.6804
1.922	16876.8	5668.04	0.33584	199.524	2354428.7648	250.87	5401.31	170	24.1582
16.925	9163.4	2920.8	0.31874	107.115	1273030.4895	137.449	3927.66	107	29.2438
2.658	10408.3	3083.42	0.29624	95.0473	1412832.273	154.422	3972.46	121	33.273
1.32	21222.6	5728.29	0.26991	298.35	2882912.1641	309.143	6594.97	287	18.722
2.85	8973.75	2135.2	0.23793	98.5881	1271341.8523	118.453	3792.17	50	35.1671
2.715	6761.26	1809.35	0.2676	71.0623	891024.3626	86.8208	3808.73	57	36.5463
4.128	24495.5	8356.32	0.34113	313.26	3404690.5231	404.459	6782.26	125	16.1494
1.832	3494.67	899.72	0.25745	36.8341	497195.5328	41.7431	1777.51	12	44.5346
13.302	7355.12	2707.13	0.36806	63.0117	948938.9947	121.052	2963.5	35	39.4967
19.999	14450.5	5926.18	0.4101	169.64	2022849.92	258.978	4442.16	120	29.1832
2.38	8660.54	2279.81	0.26324	97.6565	1184342.853	118.288	3813.74	25	34.3113
2.051	8098.16	2150.47	0.26555	81.6456	1146025.9645	103.144	3915.77	39	34.7866
3.896	6322.73	1358.44	0.21485	55.315	852304.9711	77.2169	2453.63	33	41.2423
1.776	6579.89	959.49	0.14582	47.5815	932241.7573	78.7703	2740.37	1	42.4894
2.061	9160.38	2081.05	0.22717	108.88	1250751.3365	143.034	4022.53	39	34.169
1.952	8507	2578.09	0.30305	95.7775	1165224.7473	145.279	3258.87	8	36.5875
11.51	5509.69	1065.36	0.19336	39.4443	746670.4395	83.2755	3066.51	26	41.9517
2.564	9701.53	3646.99	0.37591	137.074	1280327.6676	178.391	4419.86	168	30.8024
0.98	12158.7	2562.38	0.21074	139.217	1722766.1059	184.288	4613.63	52	29.925
7.55	4832.18	1465.99	0.30338	45.2132	622989.3254	72.0783	2244.95	28	42.6391
13.273	13506.7	5293.45	0.39191	167.675	1915482.8762	270.346	4674.68	59	28.3044
19.301	12939.4	5537.67	0.42796	127.637	1804442.0364	202.223	4868.45	116	29.747
15.9	8755.62	2698.75	0.30823	60.6469	1236120.5208	112.997	3209.83	9	36.3886
3.086	11884.3	3131.06	0.26346	148.029	1685517.6881	158.265	4148.23	133	32.1115
16.357	8210.02	1611.32	0.19626	60.6193	1167968.4124	78.8416	3659.87	25	38.8909
3.078	9533.01	1897.41	0.19903	128.52	1286292.8354	166.262	3622.1	82	34.9221
15.183	4962.97	1180.13	0.23778	41.237	678392.9441	74.8958	2530.07	20	37.6793
3.56	14268.4	4618.36	0.32367	151.371	2018153.9605	243.433	4684.95	70	28.7264
3.532	4920.77	1179.74	0.23974	40.4222	680449.96	65.1283	2811.21	26	41.6292
12.194	6578.48	2388.93	0.36314	50.3839	905097.2667	105.173	3003.27	77	39.2559
1.431	7248.16	2074.22	0.28617	81.5009	978444.7317	111.356	3099.83	81	38.8531
[truncated: 43,731 more rows]
