# Supplementary material
Source: ML conference proceedings conference paper supplement (https://proceedings.neurips.cc/paper_files/paper/2020/hash/aab085461de182608ee9f607f3f7d18f-Abstract.html)
Supplement: Supplementary file 16 [file aab085461de182608ee9f607f3f7d18f-Supplemental.zip › supplemental/evidential_regression/data/uci/wine-quality/wine_data_new.txt]

7.4 0.7 0 1.9 0.076 11 34 0.9978 3.51 0.56 9.4 5
7.8 0.88 0 2.6 0.098 25 67 0.9968 3.2 0.68 9.8 5
7.8 0.76 0.04 2.3 0.092 15 54 0.997 3.26 0.65 9.8 5
11.2 0.28 0.56 1.9 0.075 17 60 0.998 3.16 0.58 9.8 6
7.4 0.7 0 1.9 0.076 11 34 0.9978 3.51 0.56 9.4 5
7.4 0.66 0 1.8 0.075 13 40 0.9978 3.51 0.56 9.4 5
7.9 0.6 0.06 1.6 0.069 15 59 0.9964 3.3 0.46 9.4 5
7.3 0.65 0 1.2 0.065 15 21 0.9946 3.39 0.47 10 7
7.8 0.58 0.02 2 0.073 9 18 0.9968 3.36 0.57 9.5 7
7.5 0.5 0.36 6.1 0.071 17 102 0.9978 3.35 0.8 10.5 5
6.7 0.58 0.08 1.8 0.097 15 65 0.9959 3.28 0.54 9.2 5
7.5 0.5 0.36 6.1 0.071 17 102 0.9978 3.35 0.8 10.5 5
5.6 0.615 0 1.6 0.089 16 59 0.9943 3.58 0.52 9.9 5
7.8 0.61 0.29 1.6 0.114 9 29 0.9974 3.26 1.56 9.1 5
8.9 0.62 0.18 3.8 0.176 52 145 0.9986 3.16 0.88 9.2 5
8.9 0.62 0.19 3.9 0.17 51 148 0.9986 3.17 0.93 9.2 5
8.5 0.28 0.56 1.8 0.092 35 103 0.9969 3.3 0.75 10.5 7
8.1 0.56 0.28 1.7 0.368 16 56 0.9968 3.11 1.28 9.3 5
7.4 0.59 0.08 4.4 0.086 6 29 0.9974 3.38 0.5 9 4
7.9 0.32 0.51 1.8 0.341 17 56 0.9969 3.04 1.08 9.2 6
8.9 0.22 0.48 1.8 0.077 29 60 0.9968 3.39 0.53 9.4 6
7.6 0.39 0.31 2.3 0.082 23 71 0.9982 3.52 0.65 9.7 5
7.9 0.43 0.21 1.6 0.106 10 37 0.9966 3.17 0.91 9.5 5
8.5 0.49 0.11 2.3 0.084 9 67 0.9968 3.17 0.53 9.4 5
6.9 0.4 0.14 2.4 0.085 21 40 0.9968 3.43 0.63 9.7 6
6.3 0.39 0.16 1.4 0.08 11 23 0.9955 3.34 0.56 9.3 5
7.6 0.41 0.24 1.8 0.08 4 11 0.9962 3.28 0.59 9.5 5
7.9 0.43 0.21 1.6 0.106 10 37 0.9966 3.17 0.91 9.5 5
7.1 0.71 0 1.9 0.08 14 35 0.9972 3.47 0.55 9.4 5
7.8 0.645 0 2 0.082 8 16 0.9964 3.38 0.59 9.8 6
6.7 0.675 0.07 2.4 0.089 17 82 0.9958 3.35 0.54 10.1 5
6.9 0.685 0 2.5 0.105 22 37 0.9966 3.46 0.57 10.6 6
8.3 0.655 0.12 2.3 0.083 15 113 0.9966 3.17 0.66 9.8 5
6.9 0.605 0.12 10.7 0.073 40 83 0.9993 3.45 0.52 9.4 6
5.2 0.32 0.25 1.8 0.103 13 50 0.9957 3.38 0.55 9.2 5
7.8 0.645 0 5.5 0.086 5 18 0.9986 3.4 0.55 9.6 6
7.8 0.6 0.14 2.4 0.086 3 15 0.9975 3.42 0.6 10.8 6
8.1 0.38 0.28 2.1 0.066 13 30 0.9968 3.23 0.73 9.7 7
5.7 1.13 0.09 1.5 0.172 7 19 0.994 3.5 0.48 9.8 4
7.3 0.45 0.36 5.9 0.074 12 87 0.9978 3.33 0.83 10.5 5
7.3 0.45 0.36 5.9 0.074 12 87 0.9978 3.33 0.83 10.5 5
8.8 0.61 0.3 2.8 0.088 17 46 0.9976 3.26 0.51 9.3 4
7.5 0.49 0.2 2.6 0.332 8 14 0.9968 3.21 0.9 10.5 6
8.1 0.66 0.22 2.2 0.069 9 23 0.9968 3.3 1.2 10.3 5
6.8 0.67 0.02 1.8 0.05 5 11 0.9962 3.48 0.52 9.5 5
4.6 0.52 0.15 2.1 0.054 8 65 0.9934 3.9 0.56 13.1 4
7.7 0.935 0.43 2.2 0.114 22 114 0.997 3.25 0.73 9.2 5
8.7 0.29 0.52 1.6 0.113 12 37 0.9969 3.25 0.58 9.5 5
6.4 0.4 0.23 1.6 0.066 5 12 0.9958 3.34 0.56 9.2 5
5.6 0.31 0.37 1.4 0.074 12 96 0.9954 3.32 0.58 9.2 5
8.8 0.66 0.26 1.7 0.074 4 23 0.9971 3.15 0.74 9.2 5
6.6 0.52 0.04 2.2 0.069 8 15 0.9956 3.4 0.63 9.4 6
6.6 0.5 0.04 2.1 0.068 6 14 0.9955 3.39 0.64 9.4 6
8.6 0.38 0.36 3 0.081 30 119 0.997 3.2 0.56 9.4 5
7.6 0.51 0.15 2.8 0.11 33 73 0.9955 3.17 0.63 10.2 6
7.7 0.62 0.04 3.8 0.084 25 45 0.9978 3.34 0.53 9.5 5
10.2 0.42 0.57 3.4 0.07 4 10 0.9971 3.04 0.63 9.6 5
7.5 0.63 0.12 5.1 0.111 50 110 0.9983 3.26 0.77 9.4 5
7.8 0.59 0.18 2.3 0.076 17 54 0.9975 3.43 0.59 10 5
7.3 0.39 0.31 2.4 0.074 9 46 0.9962 3.41 0.54 9.4 6
8.8 0.4 0.4 2.2 0.079 19 52 0.998 3.44 0.64 9.2 5
7.7 0.69 0.49 1.8 0.115 20 112 0.9968 3.21 0.71 9.3 5
7.5 0.52 0.16 1.9 0.085 12 35 0.9968 3.38 0.62 9.5 7
7 0.735 0.05 2 0.081 13 54 0.9966 3.39 0.57 9.8 5
7.2 0.725 0.05 4.65 0.086 4 11 0.9962 3.41 0.39 10.9 5
7.2 0.725 0.05 4.65 0.086 4 11 0.9962 3.41 0.39 10.9 5
7.5 0.52 0.11 1.5 0.079 11 39 0.9968 3.42 0.58 9.6 5
6.6 0.705 0.07 1.6 0.076 6 15 0.9962 3.44 0.58 10.7 5
9.3 0.32 0.57 2 0.074 27 65 0.9969 3.28 0.79 10.7 5
8 0.705 0.05 1.9 0.074 8 19 0.9962 3.34 0.95 10.5 6
7.7 0.63 0.08 1.9 0.076 15 27 0.9967 3.32 0.54 9.5 6
7.7 0.67 0.23 2.1 0.088 17 96 0.9962 3.32 0.48 9.5 5
7.7 0.69 0.22 1.9 0.084 18 94 0.9961 3.31 0.48 9.5 5
8.3 0.675 0.26 2.1 0.084 11 43 0.9976 3.31 0.53 9.2 4
9.7 0.32 0.54 2.5 0.094 28 83 0.9984 3.28 0.82 9.6 5
8.8 0.41 0.64 2.2 0.093 9 42 0.9986 3.54 0.66 10.5 5
8.8 0.41 0.64 2.2 0.093 9 42 0.9986 3.54 0.66 10.5 5
6.8 0.785 0 2.4 0.104 14 30 0.9966 3.52 0.55 10.7 6
6.7 0.75 0.12 2 0.086 12 80 0.9958 3.38 0.52 10.1 5
8.3 0.625 0.2 1.5 0.08 27 119 0.9972 3.16 1.12 9.1 4
6.2 0.45 0.2 1.6 0.069 3 15 0.9958 3.41 0.56 9.2 5
7.8 0.43 0.7 1.9 0.464 22 67 0.9974 3.13 1.28 9.4 5
7.4 0.5 0.47 2 0.086 21 73 0.997 3.36 0.57 9.1 5
7.3 0.67 0.26 1.8 0.401 16 51 0.9969 3.16 1.14 9.4 5
6.3 0.3 0.48 1.8 0.069 18 61 0.9959 3.44 0.78 10.3 6
6.9 0.55 0.15 2.2 0.076 19 40 0.9961 3.41 0.59 10.1 5
8.6 0.49 0.28 1.9 0.11 20 136 0.9972 2.93 1.95 9.9 6
7.7 0.49 0.26 1.9 0.062 9 31 0.9966 3.39 0.64 9.6 5
9.3 0.39 0.44 2.1 0.107 34 125 0.9978 3.14 1.22 9.5 5
7 0.62 0.08 1.8 0.076 8 24 0.9978 3.48 0.53 9 5
7.9 0.52 0.26 1.9 0.079 42 140 0.9964 3.23 0.54 9.5 5
8.6 0.49 0.28 1.9 0.11 20 136 0.9972 2.93 1.95 9.9 6
8.6 0.49 0.29 2 0.11 19 133 0.9972 2.93 1.98 9.8 5
7.7 0.49 0.26 1.9 0.062 9 31 0.9966 3.39 0.64 9.6 5
5 1.02 0.04 1.4 0.045 41 85 0.9938 3.75 0.48 10.5 4
4.7 0.6 0.17 2.3 0.058 17 106 0.9932 3.85 0.6 12.9 6
6.8 0.775 0 3 0.102 8 23 0.9965 3.45 0.56 10.7 5
7 0.5 0.25 2 0.07 3 22 0.9963 3.25 0.63 9.2 5
7.6 0.9 0.06 2.5 0.079 5 10 0.9967 3.39 0.56 9.8 5
8.1 0.545 0.18 1.9 0.08 13 35 0.9972 3.3 0.59 9 6
8.3 0.61 0.3 2.1 0.084 11 50 0.9972 3.4 0.61 10.2 6
7.8 0.5 0.3 1.9 0.075 8 22 0.9959 3.31 0.56 10.4 6
8.1 0.545 0.18 1.9 0.08 13 35 0.9972 3.3 0.59 9 6
8.1 0.575 0.22 2.1 0.077 12 65 0.9967 3.29 0.51 9.2 5
7.2 0.49 0.24 2.2 0.07 5 36 0.996 3.33 0.48 9.4 5
8.1 0.575 0.22 2.1 0.077 12 65 0.9967 3.29 0.51 9.2 5
7.8 0.41 0.68 1.7 0.467 18 69 0.9973 3.08 1.31 9.3 5
6.2 0.63 0.31 1.7 0.088 15 64 0.9969 3.46 0.79 9.3 5
8 0.33 0.53 2.5 0.091 18 80 0.9976 3.37 0.8 9.6 6
8.1 0.785 0.52 2 0.122 37 153 0.9969 3.21 0.69 9.3 5
7.8 0.56 0.19 1.8 0.104 12 47 0.9964 3.19 0.93 9.5 5
8.4 0.62 0.09 2.2 0.084 11 108 0.9964 3.15 0.66 9.8 5
8.4 0.6 0.1 2.2 0.085 14 111 0.9964 3.15 0.66 9.8 5
10.1 0.31 0.44 2.3 0.08 22 46 0.9988 3.32 0.67 9.7 6
7.8 0.56 0.19 1.8 0.104 12 47 0.9964 3.19 0.93 9.5 5
9.4 0.4 0.31 2.2 0.09 13 62 0.9966 3.07 0.63 10.5 6
8.3 0.54 0.28 1.9 0.077 11 40 0.9978 3.39 0.61 10 6
7.8 0.56 0.12 2 0.082 7 28 0.997 3.37 0.5 9.4 6
8.8 0.55 0.04 2.2 0.119 14 56 0.9962 3.21 0.6 10.9 6
7 0.69 0.08 1.8 0.097 22 89 0.9959 3.34 0.54 9.2 6
7.3 1.07 0.09 1.7 0.178 10 89 0.9962 3.3 0.57 9 5
8.8 0.55 0.04 2.2 0.119 14 56 0.9962 3.21 0.6 10.9 6
7.3 0.695 0 2.5 0.075 3 13 0.998 3.49 0.52 9.2 5
8 0.71 0 2.6 0.08 11 34 0.9976 3.44 0.53 9.5 5
7.8 0.5 0.17 1.6 0.082 21 102 0.996 3.39 0.48 9.5 5
9 0.62 0.04 1.9 0.146 27 90 0.9984 3.16 0.7 9.4 5
8.2 1.33 0 1.7 0.081 3 12 0.9964 3.53 0.49 10.9 5
8.1 1.33 0 1.8 0.082 3 12 0.9964 3.54 0.48 10.9 5
8 0.59 0.16 1.8 0.065 3 16 0.9962 3.42 0.92 10.5 7
6.1 0.38 0.15 1.8 0.072 6 19 0.9955 3.42 0.57 9.4 5
8 0.745 0.56 2 0.118 30 134 0.9968 3.24 0.66 9.4 5
5.6 0.5 0.09 2.3 0.049 17 99 0.9937 3.63 0.63 13 5
5.6 0.5 0.09 2.3 0.049 17 99 0.9937 3.63 0.63 13 5
6.6 0.5 0.01 1.5 0.06 17 26 0.9952 3.4 0.58 9.8 6
7.9 1.04 0.05 2.2 0.084 13 29 0.9959 3.22 0.55 9.9 6
8.4 0.745 0.11 1.9 0.09 16 63 0.9965 3.19 0.82 9.6 5
8.3 0.715 0.15 1.8 0.089 10 52 0.9968 3.23 0.77 9.5 5
7.2 0.415 0.36 2 0.081 13 45 0.9972 3.48 0.64 9.2 5
7.8 0.56 0.19 2.1 0.081 15 105 0.9962 3.33 0.54 9.5 5
7.8 0.56 0.19 2 0.081 17 108 0.9962 3.32 0.54 9.5 5
8.4 0.745 0.11 1.9 0.09 16 63 0.9965 3.19 0.82 9.6 5
8.3 0.715 0.15 1.8 0.089 10 52 0.9968 3.23 0.77 9.5 5
5.2 0.34 0 1.8 0.05 27 63 0.9916 3.68 0.79 14 6
6.3 0.39 0.08 1.7 0.066 3 20 0.9954 3.34 0.58 9.4 5
5.2 0.34 0 1.8 0.05 27 63 0.9916 3.68 0.79 14 6
8.1 0.67 0.55 1.8 0.117 32 141 0.9968 3.17 0.62 9.4 5
5.8 0.68 0.02 1.8 0.087 21 94 0.9944 3.54 0.52 10 5
7.6 0.49 0.26 1.6 0.236 10 88 0.9968 3.11 0.8 9.3 5
6.9 0.49 0.1 2.3 0.074 12 30 0.9959 3.42 0.58 10.2 6
8.2 0.4 0.44 2.8 0.089 11 43 0.9975 3.53 0.61 10.5 6
7.3 0.33 0.47 2.1 0.077 5 11 0.9958 3.33 0.53 10.3 6
9.2 0.52 1 3.4 0.61 32 69 0.9996 2.74 2 9.4 4
7.5 0.6 0.03 1.8 0.095 25 99 0.995 3.35 0.54 10.1 5
7.5 0.6 0.03 1.8 0.095 25 99 0.995 3.35 0.54 10.1 5
7.1 0.43 0.42 5.5 0.07 29 129 0.9973 3.42 0.72 10.5 5
7.1 0.43 0.42 5.5 0.071 28 128 0.9973 3.42 0.71 10.5 5
7.1 0.43 0.42 5.5 0.07 29 129 0.9973 3.42 0.72 10.5 5
7.1 0.43 0.42 5.5 0.071 28 128 0.9973 3.42 0.71 10.5 5
7.1 0.68 0 2.2 0.073 12 22 0.9969 3.48 0.5 9.3 5
6.8 0.6 0.18 1.9 0.079 18 86 0.9968 3.59 0.57 9.3 6
7.6 0.95 0.03 2 0.09 7 20 0.9959 3.2 0.56 9.6 5
7.6 0.68 0.02 1.3 0.072 9 20 0.9965 3.17 1.08 9.2 4
7.8 0.53 0.04 1.7 0.076 17 31 0.9964 3.33 0.56 10 6
7.4 0.6 0.26 7.3 0.07 36 121 0.9982 3.37 0.49 9.4 5
7.3 0.59 0.26 7.2 0.07 35 121 0.9981 3.37 0.49 9.4 5
7.8 0.63 0.48 1.7 0.1 14 96 0.9961 3.19 0.62 9.5 5
6.8 0.64 0.1 2.1 0.085 18 101 0.9956 3.34 0.52 10.2 5
7.3 0.55 0.03 1.6 0.072 17 42 0.9956 3.37 0.48 9 4
6.8 0.63 0.07 2.1 0.089 11 44 0.9953 3.47 0.55 10.4 6
7.5 0.705 0.24 1.8 0.36 15 63 0.9964 3 1.59 9.5 5
7.9 0.885 0.03 1.8 0.058 4 8 0.9972 3.36 0.33 9.1 4
8 0.42 0.17 2 0.073 6 18 0.9972 3.29 0.61 9.2 6
8 0.42 0.17 2 0.073 6 18 0.9972 3.29 0.61 9.2 6
7.4 0.62 0.05 1.9 0.068 24 42 0.9961 3.42 0.57 11.5 6
7.3 0.38 0.21 2 0.08 7 35 0.9961 3.33 0.47 9.5 5
6.9 0.5 0.04 1.5 0.085 19 49 0.9958 3.35 0.78 9.5 5
7.3 0.38 0.21 2 0.08 7 35 0.9961 3.33 0.47 9.5 5
7.5 0.52 0.42 2.3 0.087 8 38 0.9972 3.58 0.61 10.5 6
7 0.805 0 2.5 0.068 7 20 0.9969 3.48 0.56 9.6 5
8.8 0.61 0.14 2.4 0.067 10 42 0.9969 3.19 0.59 9.5 5
8.8 0.61 0.14 2.4 0.067 10 42 0.9969 3.19 0.59 9.5 5
8.9 0.61 0.49 2 0.27 23 110 0.9972 3.12 1.02 9.3 5
7.2 0.73 0.02 2.5 0.076 16 42 0.9972 3.44 0.52 9.3 5
6.8 0.61 0.2 1.8 0.077 11 65 0.9971 3.54 0.58 9.3 5
6.7 0.62 0.21 1.9 0.079 8 62 0.997 3.52 0.58 9.3 6
8.9 0.31 0.57 2 0.111 26 85 0.9971 3.26 0.53 9.7 5
7.4 0.39 0.48 2 0.082 14 67 0.9972 3.34 0.55 9.2 5
7.7 0.705 0.1 2.6 0.084 9 26 0.9976 3.39 0.49 9.7 5
7.9 0.5 0.33 2 0.084 15 143 0.9968 3.2 0.55 9.5 5
7.9 0.49 0.32 1.9 0.082 17 144 0.9968 3.2 0.55 9.5 5
8.2 0.5 0.35 2.9 0.077 21 127 0.9976 3.23 0.62 9.4 5
6.4 0.37 0.25 1.9 0.074 21 49 0.9974 3.57 0.62 9.8 6
6.8 0.63 0.12 3.8 0.099 16 126 0.9969 3.28 0.61 9.5 5
7.6 0.55 0.21 2.2 0.071 7 28 0.9964 3.28 0.55 9.7 5
7.6 0.55 0.21 2.2 0.071 7 28 0.9964 3.28 0.55 9.7 5
7.8 0.59 0.33 2 0.074 24 120 0.9968 3.25 0.54 9.4 5
7.3 0.58 0.3 2.4 0.074 15 55 0.9968 3.46 0.59 10.2 5
11.5 0.3 0.6 2 0.067 12 27 0.9981 3.11 0.97 10.1 6
5.4 0.835 0.08 1.2 0.046 13 93 0.9924 3.57 0.85 13 7
6.9 1.09 0.06 2.1 0.061 12 31 0.9948 3.51 0.43 11.4 4
9.6 0.32 0.47 1.4 0.056 9 24 0.99695 3.22 0.82 10.3 7
8.8 0.37 0.48 2.1 0.097 39 145 0.9975 3.04 1.03 9.3 5
6.8 0.5 0.11 1.5 0.075 16 49 0.99545 3.36 0.79 9.5 5
7 0.42 0.35 1.6 0.088 16 39 0.9961 3.34 0.55 9.2 5
7 0.43 0.36 1.6 0.089 14 37 0.99615 3.34 0.56 9.2 6
12.8 0.3 0.74 2.6 0.095 9 28 0.9994 3.2 0.77 10.8 7
12.8 0.3 0.74 2.6 0.095 9 28 0.9994 3.2 0.77 10.8 7
7.8 0.57 0.31 1.8 0.069 26 120 0.99625 3.29 0.53 9.3 5
7.8 0.44 0.28 2.7 0.1 18 95 0.9966 3.22 0.67 9.4 5
11 0.3 0.58 2.1 0.054 7 19 0.998 3.31 0.88 10.5 7
9.7 0.53 0.6 2 0.039 5 19 0.99585 3.3 0.86 12.4 6
8 0.725 0.24 2.8 0.083 10 62 0.99685 3.35 0.56 10 6
11.6 0.44 0.64 2.1 0.059 5 15 0.998 3.21 0.67 10.2 6
8.2 0.57 0.26 2.2 0.06 28 65 0.9959 3.3 0.43 10.1 5
7.8 0.735 0.08 2.4 0.092 10 41 0.9974 3.24 0.71 9.8 6
7 0.49 0.49 5.6 0.06 26 121 0.9974 3.34 0.76 10.5 5
8.7 0.625 0.16 2 0.101 13 49 0.9962 3.14 0.57 11 5
8.1 0.725 0.22 2.2 0.072 11 41 0.9967 3.36 0.55 9.1 5
7.5 0.49 0.19 1.9 0.076 10 44 0.9957 3.39 0.54 9.7 5
7.8 0.53 0.33 2.4 0.08 24 144 0.99655 3.3 0.6 9.5 5
7.8 0.34 0.37 2 0.082 24 58 0.9964 3.34 0.59 9.4 6
7.4 0.53 0.26 2 0.101 16 72 0.9957 3.15 0.57 9.4 5
6.8 0.61 0.04 1.5 0.057 5 10 0.99525 3.42 0.6 9.5 5
8.6 0.645 0.25 2 0.083 8 28 0.99815 3.28 0.6 10 6
8.4 0.635 0.36 2 0.089 15 55 0.99745 3.31 0.57 10.4 4
7.7 0.43 0.25 2.6 0.073 29 63 0.99615 3.37 0.58 10.5 6
8.9 0.59 0.5 2 0.337 27 81 0.9964 3.04 1.61 9.5 6
9 0.82 0.14 2.6 0.089 9 23 0.9984 3.39 0.63 9.8 5
7.7 0.43 0.25 2.6 0.073 29 63 0.99615 3.37 0.58 10.5 6
6.9 0.52 0.25 2.6 0.081 10 37 0.99685 3.46 0.5 11 5
5.2 0.48 0.04 1.6 0.054 19 106 0.9927 3.54 0.62 12.2 7
8 0.38 0.06 1.8 0.078 12 49 0.99625 3.37 0.52 9.9 6
8.5 0.37 0.2 2.8 0.09 18 58 0.998 3.34 0.7 9.6 6
6.9 0.52 0.25 2.6 0.081 10 37 0.99685 3.46 0.5 11 5
8.2 1 0.09 2.3 0.065 7 37 0.99685 3.32 0.55 9 6
7.2 0.63 0 1.9 0.097 14 38 0.99675 3.37 0.58 9 6
7.2 0.63 0 1.9 0.097 14 38 0.99675 3.37 0.58 9 6
7.2 0.645 0 1.9 0.097 15 39 0.99675 3.37 0.58 9.2 6
7.2 0.63 0 1.9 0.097 14 38 0.99675 3.37 0.58 9 6
8.2 1 0.09 2.3 0.065 7 37 0.99685 3.32 0.55 9 6
8.9 0.635 0.37 1.7 0.263 5 62 0.9971 3 1.09 9.3 5
12 0.38 0.56 2.1 0.093 6 24 0.99925 3.14 0.71 10.9 6
7.7 0.58 0.1 1.8 0.102 28 109 0.99565 3.08 0.49 9.8 6
15 0.21 0.44 2.2 0.075 10 24 1.00005 3.07 0.84 9.2 7
15 0.21 0.44 2.2 0.075 10 24 1.00005 3.07 0.84 9.2 7
7.3 0.66 0 2 0.084 6 23 0.9983 3.61 0.96 9.9 6
7.1 0.68 0.07 1.9 0.075 16 51 0.99685 3.38 0.52 9.5 5
8.2 0.6 0.17 2.3 0.072 11 73 0.9963 3.2 0.45 9.3 5
7.7 0.53 0.06 1.7 0.074 9 39 0.99615 3.35 0.48 9.8 6
7.3 0.66 0 2 0.084 6 23 0.9983 3.61 0.96 9.9 6
10.8 0.32 0.44 1.6 0.063 16 37 0.9985 3.22 0.78 10 6
7.1 0.6 0 1.8 0.074 16 34 0.9972 3.47 0.7 9.9 6
11.1 0.35 0.48 3.1 0.09 5 21 0.9986 3.17 0.53 10.5 5
7.7 0.775 0.42 1.9 0.092 8 86 0.9959 3.23 0.59 9.5 5
7.1 0.6 0 1.8 0.074 16 34 0.9972 3.47 0.7 9.9 6
8 0.57 0.23 3.2 0.073 17 119 0.99675 3.26 0.57 9.3 5
9.4 0.34 0.37 2.2 0.075 5 13 0.998 3.22 0.62 9.2 5
6.6 0.695 0 2.1 0.075 12 56 0.9968 3.49 0.67 9.2 5
7.7 0.41 0.76 1.8 0.611 8 45 0.9968 3.06 1.26 9.4 5
10 0.31 0.47 2.6 0.085 14 33 0.99965 3.36 0.8 10.5 7
7.9 0.33 0.23 1.7 0.077 18 45 0.99625 3.29 0.65 9.3 5
7 0.975 0.04 2 0.087 12 67 0.99565 3.35 0.6 9.4 4
8 0.52 0.03 1.7 0.07 10 35 0.99575 3.34 0.57 10 5
7.9 0.37 0.23 1.8 0.077 23 49 0.9963 3.28 0.67 9.3 5
12.5 0.56 0.49 2.4 0.064 5 27 0.9999 3.08 0.87 10.9 5
11.8 0.26 0.52 1.8 0.071 6 10 0.9968 3.2 0.72 10.2 7
8.1 0.87 0 3.3 0.096 26 61 1.00025 3.6 0.72 9.8 4
7.9 0.35 0.46 3.6 0.078 15 37 0.9973 3.35 0.86 12.8 8
6.9 0.54 0.04 3 0.077 7 27 0.9987 3.69 0.91 9.4 6
11.5 0.18 0.51 4 0.104 4 23 0.9996 3.28 0.97 10.1 6
7.9 0.545 0.06 4 0.087 27 61 0.9965 3.36 0.67 10.7 6
11.5 0.18 0.51 4 0.104 4 23 0.9996 3.28 0.97 10.1 6
10.9 0.37 0.58 4 0.071 17 65 0.99935 3.22 0.78 10.1 5
8.4 0.715 0.2 2.4 0.076 10 38 0.99735 3.31 0.64 9.4 5
7.5 0.65 0.18 7 0.088 27 94 0.99915 3.38 0.77 9.4 5
7.9 0.545 0.06 4 0.087 27 61 0.9965 3.36 0.67 10.7 6
6.9 0.54 0.04 3 0.077 7 27 0.9987 3.69 0.91 9.4 6
11.5 0.18 0.51 4 0.104 4 23 0.9996 3.28 0.97 10.1 6
10.3 0.32 0.45 6.4 0.073 5 13 0.9976 3.23 0.82 12.6 8
8.9 0.4 0.32 5.6 0.087 10 47 0.9991 3.38 0.77 10.5 7
11.4 0.26 0.44 3.6 0.071 6 19 0.9986 3.12 0.82 9.3 6
7.7 0.27 0.68 3.5 0.358 5 10 0.9972 3.25 1.08 9.9 7
7.6 0.52 0.12 3 0.067 12 53 0.9971 3.36 0.57 9.1 5
8.9 0.4 0.32 5.6 0.087 10 47 0.9991 3.38 0.77 10.5 7
9.9 0.59 0.07 3.4 0.102 32 71 1.00015 3.31 0.71 9.8 5
9.9 0.59 0.07 3.4 0.102 32 71 1.00015 3.31 0.71 9.8 5
12 0.45 0.55 2 0.073 25 49 0.9997 3.1 0.76 10.3 6
7.5 0.4 0.12 3 0.092 29 53 0.9967 3.37 0.7 10.3 6
8.7 0.52 0.09 2.5 0.091 20 49 0.9976 3.34 0.86 10.6 7
11.6 0.42 0.53 3.3 0.105 33 98 1.001 3.2 0.95 9.2 5
8.7 0.52 0.09 2.5 0.091 20 49 0.9976 3.34 0.86 10.6 7
11 0.2 0.48 2 0.343 6 18 0.9979 3.3 0.71 10.5 5
10.4 0.55 0.23 2.7 0.091 18 48 0.9994 3.22 0.64 10.3 6
6.9 0.36 0.25 2.4 0.098 5 16 0.9964 3.41 0.6 10.1 6
13.3 0.34 0.52 3.2 0.094 17 53 1.0014 3.05 0.81 9.5 6
10.8 0.5 0.46 2.5 0.073 5 27 1.0001 3.05 0.64 9.5 5
10.6 0.83 0.37 2.6 0.086 26 70 0.9981 3.16 0.52 9.9 5
7.1 0.63 0.06 2 0.083 8 29 0.99855 3.67 0.73 9.6 5
7.2 0.65 0.02 2.3 0.094 5 31 0.9993 3.67 0.8 9.7 5
6.9 0.67 0.06 2.1 0.08 8 33 0.99845 3.68 0.71 9.6 5
7.5 0.53 0.06 2.6 0.086 20 44 0.9965 3.38 0.59 10.7 6
11.1 0.18 0.48 1.5 0.068 7 15 0.9973 3.22 0.64 10.1 6
8.3 0.705 0.12 2.6 0.092 12 28 0.9994 3.51 0.72 10 5
7.4 0.67 0.12 1.6 0.186 5 21 0.996 3.39 0.54 9.5 5
8.4 0.65 0.6 2.1 0.112 12 90 0.9973 3.2 0.52 9.2 5
10.3 0.53 0.48 2.5 0.063 6 25 0.9998 3.12 0.59 9.3 6
7.6 0.62 0.32 2.2 0.082 7 54 0.9966 3.36 0.52 9.4 5
10.3 0.41 0.42 2.4 0.213 6 14 0.9994 3.19 0.62 9.5 6
10.3 0.43 0.44 2.4 0.214 5 12 0.9994 3.19 0.63 9.5 6
7.4 0.29 0.38 1.7 0.062 9 30 0.9968 3.41 0.53 9.5 6
10.3 0.53 0.48 2.5 0.063 6 25 0.9998 3.12 0.59 9.3 6
7.9 0.53 0.24 2 0.072 15 105 0.996 3.27 0.54 9.4 6
9 0.46 0.31 2.8 0.093 19 98 0.99815 3.32 0.63 9.5 6
8.6 0.47 0.3 3 0.076 30 135 0.9976 3.3 0.53 9.4 5
7.4 0.36 0.29 2.6 0.087 26 72 0.99645 3.39 0.68 11 5
7.1 0.35 0.29 2.5 0.096 20 53 0.9962 3.42 0.65 11 6
9.6 0.56 0.23 3.4 0.102 37 92 0.9996 3.3 0.65 10.1 5
9.6 0.77 0.12 2.9 0.082 30 74 0.99865 3.3 0.64 10.4 6
9.8 0.66 0.39 3.2 0.083 21 59 0.9989 3.37 0.71 11.5 7
9.6 0.77 0.12 2.9 0.082 30 74 0.99865 3.3 0.64 10.4 6
9.8 0.66 0.39 3.2 0.083 21 59 0.9989 3.37 0.71 11.5 7
9.3 0.61 0.26 3.4 0.09 25 87 0.99975 3.24 0.62 9.7 5
7.8 0.62 0.05 2.3 0.079 6 18 0.99735 3.29 0.63 9.3 5
10.3 0.59 0.42 2.8 0.09 35 73 0.999 3.28 0.7 9.5 6
10 0.49 0.2 11 0.071 13 50 1.0015 3.16 0.69 9.2 6
10 0.49 0.2 11 0.071 13 50 1.0015 3.16 0.69 9.2 6
11.6 0.53 0.66 3.65 0.121 6 14 0.9978 3.05 0.74 11.5 7
10.3 0.44 0.5 4.5 0.107 5 13 0.998 3.28 0.83 11.5 5
13.4 0.27 0.62 2.6 0.082 6 21 1.0002 3.16 0.67 9.7 6
10.7 0.46 0.39 2 0.061 7 15 0.9981 3.18 0.62 9.5 5
10.2 0.36 0.64 2.9 0.122 10 41 0.998 3.23 0.66 12.5 6
10.2 0.36 0.64 2.9 0.122 10 41 0.998 3.23 0.66 12.5 6
8 0.58 0.28 3.2 0.066 21 114 0.9973 3.22 0.54 9.4 6
8.4 0.56 0.08 2.1 0.105 16 44 0.9958 3.13 0.52 11 5
7.9 0.65 0.01 2.5 0.078 17 38 0.9963 3.34 0.74 11.7 7
11.9 0.695 0.53 3.4 0.128 7 21 0.9992 3.17 0.84 12.2 7
8.9 0.43 0.45 1.9 0.052 6 16 0.9948 3.35 0.7 12.5 6
7.8 0.43 0.32 2.8 0.08 29 58 0.9974 3.31 0.64 10.3 5
12.4 0.49 0.58 3 0.103 28 99 1.0008 3.16 1 11.5 6
12.5 0.28 0.54 2.3 0.082 12 29 0.9997 3.11 1.36 9.8 7
12.2 0.34 0.5 2.4 0.066 10 21 1 3.12 1.18 9.2 6
10.6 0.42 0.48 2.7 0.065 5 18 0.9972 3.21 0.87 11.3 6
10.9 0.39 0.47 1.8 0.118 6 14 0.9982 3.3 0.75 9.8 6
10.9 0.39 0.47 1.8 0.118 6 14 0.9982 3.3 0.75 9.8 6
11.9 0.57 0.5 2.6 0.082 6 32 1.0006 3.12 0.78 10.7 6
7 0.685 0 1.9 0.067 40 63 0.9979 3.6 0.81 9.9 5
6.6 0.815 0.02 2.7 0.072 17 34 0.9955 3.58 0.89 12.3 7
13.8 0.49 0.67 3 0.093 6 15 0.9986 3.02 0.93 12 6
9.6 0.56 0.31 2.8 0.089 15 46 0.9979 3.11 0.92 10 6
9.1 0.785 0 2.6 0.093 11 28 0.9994 3.36 0.86 9.4 6
10.7 0.67 0.22 2.7 0.107 17 34 1.0004 3.28 0.98 9.9 6
9.1 0.795 0 2.6 0.096 11 26 0.9994 3.35 0.83 9.4 6
7.7 0.665 0 2.4 0.09 8 19 0.9974 3.27 0.73 9.3 5
13.5 0.53 0.79 4.8 0.12 23 77 1.0018 3.18 0.77 13 5
6.1 0.21 0.4 1.4 0.066 40.5 165 0.9912 3.25 0.59 11.9 6
6.7 0.75 0.01 2.4 0.078 17 32 0.9955 3.55 0.61 12.8 6
11.5 0.41 0.52 3 0.08 29 55 1.0001 3.26 0.88 11 5
10.5 0.42 0.66 2.95 0.116 12 29 0.997 3.24 0.75 11.7 7
11.9 0.43 0.66 3.1 0.109 10 23 1 3.15 0.85 10.4 7
12.6 0.38 0.66 2.6 0.088 10 41 1.001 3.17 0.68 9.8 6
8.2 0.7 0.23 2 0.099 14 81 0.9973 3.19 0.7 9.4 5
8.6 0.45 0.31 2.6 0.086 21 50 0.9982 3.37 0.91 9.9 6
11.9 0.58 0.66 2.5 0.072 6 37 0.9992 3.05 0.56 10 5
12.5 0.46 0.63 2 0.071 6 15 0.9988 2.99 0.87 10.2 5
12.8 0.615 0.66 5.8 0.083 7 42 1.0022 3.07 0.73 10 7
10 0.42 0.5 3.4 0.107 7 21 0.9979 3.26 0.93 11.8 6
12.8 0.615 0.66 5.8 0.083 7 42 1.0022 3.07 0.73 10 7
10.4 0.575 0.61 2.6 0.076 11 24 1 3.16 0.69 9 5
10.3 0.34 0.52 2.8 0.159 15 75 0.9998 3.18 0.64 9.4 5
9.4 0.27 0.53 2.4 0.074 6 18 0.9962 3.2 1.13 12 7
6.9 0.765 0.02 2.3 0.063 35 63 0.9975 3.57 0.78 9.9 5
7.9 0.24 0.4 1.6 0.056 11 25 0.9967 3.32 0.87 8.7 6
9.1 0.28 0.48 1.8 0.067 26 46 0.9967 3.32 1.04 10.6 6
7.4 0.55 0.22 2.2 0.106 12 72 0.9959 3.05 0.63 9.2 5
14 0.41 0.63 3.8 0.089 6 47 1.0014 3.01 0.81 10.8 6
11.5 0.54 0.71 4.4 0.124 6 15 0.9984 3.01 0.83 11.8 7
11.5 0.45 0.5 3 0.078 19 47 1.0003 3.26 1.11 11 6
9.4 0.27 0.53 2.4 0.074 6 18 0.9962 3.2 1.13 12 7
11.4 0.625 0.66 6.2 0.088 6 24 0.9988 3.11 0.99 13.3 6
8.3 0.42 0.38 2.5 0.094 24 60 0.9979 3.31 0.7 10.8 6
8.3 0.26 0.42 2 0.08 11 27 0.9974 3.21 0.8 9.4 6
13.7 0.415 0.68 2.9 0.085 17 43 1.0014 3.06 0.8 10 6
8.3 0.26 0.42 2 0.08 11 27 0.9974 3.21 0.8 9.4 6
8.3 0.26 0.42 2 0.08 11 27 0.9974 3.21 0.8 9.4 6
7.7 0.51 0.28 2.1 0.087 23 54 0.998 3.42 0.74 9.2 5
7.4 0.63 0.07 2.4 0.09 11 37 0.9979 3.43 0.76 9.7 6
7.8 0.54 0.26 2 0.088 23 48 0.9981 3.41 0.74 9.2 6
8.3 0.66 0.15 1.9 0.079 17 42 0.9972 3.31 0.54 9.6 6
7.8 0.46 0.26 1.9 0.088 23 53 0.9981 3.43 0.74 9.2 6
9.6 0.38 0.31 2.5 0.096 16 49 0.9982 3.19 0.7 10 7
5.6 0.85 0.05 1.4 0.045 12 88 0.9924 3.56 0.82 12.9 8
13.7 0.415 0.68 2.9 0.085 17 43 1.0014 3.06 0.8 10 6
9.5 0.37 0.52 2 0.082 6 26 0.998 3.18 0.51 9.5 5
8.4 0.665 0.61 2 0.112 13 95 0.997 3.16 0.54 9.1 5
12.7 0.6 0.65 2.3 0.063 6 25 0.9997 3.03 0.57 9.9 5
12 0.37 0.76 4.2 0.066 7 38 1.0004 3.22 0.6 13 7
6.6 0.735 0.02 7.9 0.122 68 124 0.9994 3.47 0.53 9.9 5
11.5 0.59 0.59 2.6 0.087 13 49 0.9988 3.18 0.65 11 6
11.5 0.59 0.59 2.6 0.087 13 49 0.9988 3.18 0.65 11 6
8.7 0.765 0.22 2.3 0.064 9 42 0.9963 3.1 0.55 9.4 5
6.6 0.735 0.02 7.9 0.122 68 124 0.9994 3.47 0.53 9.9 5
7.7 0.26 0.3 1.7 0.059 20 38 0.9949 3.29 0.47 10.8 6
12.2 0.48 0.54 2.6 0.085 19 64 1 3.1 0.61 10.5 6
11.4 0.6 0.49 2.7 0.085 10 41 0.9994 3.15 0.63 10.5 6
7.7 0.69 0.05 2.7 0.075 15 27 0.9974 3.26 0.61 9.1 5
8.7 0.31 0.46 1.4 0.059 11 25 0.9966 3.36 0.76 10.1 6
9.8 0.44 0.47 2.5 0.063 9 28 0.9981 3.24 0.65 10.8 6
12 0.39 0.66 3 0.093 12 30 0.9996 3.18 0.63 10.8 7
10.4 0.34 0.58 3.7 0.174 6 16 0.997 3.19 0.7 11.3 6
12.5 0.46 0.49 4.5 0.07 26 49 0.9981 3.05 0.57 9.6 4
9 0.43 0.34 2.5 0.08 26 86 0.9987 3.38 0.62 9.5 6
9.1 0.45 0.35 2.4 0.08 23 78 0.9987 3.38 0.62 9.5 5
7.1 0.735 0.16 1.9 0.1 15 77 0.9966 3.27 0.64 9.3 5
9.9 0.4 0.53 6.7 0.097 6 19 0.9986 3.27 0.82 11.7 7
8.8 0.52 0.34 2.7 0.087 24 122 0.9982 3.26 0.61 9.5 5
8.6 0.725 0.24 6.6 0.117 31 134 1.0014 3.32 1.07 9.3 5
10.6 0.48 0.64 2.2 0.111 6 20 0.997 3.26 0.66 11.7 6
7 0.58 0.12 1.9 0.091 34 124 0.9956 3.44 0.48 10.5 5
11.9 0.38 0.51 2 0.121 7 20 0.9996 3.24 0.76 10.4 6
6.8 0.77 0 1.8 0.066 34 52 0.9976 3.62 0.68 9.9 5
9.5 0.56 0.33 2.4 0.089 35 67 0.9972 3.28 0.73 11.8 7
6.6 0.84 0.03 2.3 0.059 32 48 0.9952 3.52 0.56 12.3 7
7.7 0.96 0.2 2 0.047 15 60 0.9955 3.36 0.44 10.9 5
10.5 0.24 0.47 2.1 0.066 6 24 0.9978 3.15 0.9 11 7
7.7 0.96 0.2 2 0.047 15 60 0.9955 3.36 0.44 10.9 5
6.6 0.84 0.03 2.3 0.059 32 48 0.9952 3.52 0.56 12.3 7
6.4 0.67 0.08 2.1 0.045 19 48 0.9949 3.49 0.49 11.4 6
9.5 0.78 0.22 1.9 0.077 6 32 0.9988 3.26 0.56 10.6 6
9.1 0.52 0.33 1.3 0.07 9 30 0.9978 3.24 0.6 9.3 5
12.8 0.84 0.63 2.4 0.088 13 35 0.9997 3.1 0.6 10.4 6
10.5 0.24 0.47 2.1 0.066 6 24 0.9978 3.15 0.9 11 7
7.8 0.55 0.35 2.2 0.074 21 66 0.9974 3.25 0.56 9.2 5
11.9 0.37 0.69 2.3 0.078 12 24 0.9958 3 0.65 12.8 6
12.3 0.39 0.63 2.3 0.091 6 18 1.0004 3.16 0.49 9.5 5
10.4 0.41 0.55 3.2 0.076 22 54 0.9996 3.15 0.89 9.9 6
12.3 0.39 0.63 2.3 0.091 6 18 1.0004 3.16 0.49 9.5 5
8 0.67 0.3 2 0.06 38 62 0.9958 3.26 0.56 10.2 6
11.1 0.45 0.73 3.2 0.066 6 22 0.9986 3.17 0.66 11.2 6
10.4 0.41 0.55 3.2 0.076 22 54 0.9996 3.15 0.89 9.9 6
7 0.62 0.18 1.5 0.062 7 50 0.9951 3.08 0.6 9.3 5
12.6 0.31 0.72 2.2 0.072 6 29 0.9987 2.88 0.82 9.8 8
11.9 0.4 0.65 2.15 0.068 7 27 0.9988 3.06 0.68 11.3 6
15.6 0.685 0.76 3.7 0.1 6 43 1.0032 2.95 0.68 11.2 7
10 0.44 0.49 2.7 0.077 11 19 0.9963 3.23 0.63 11.6 7
5.3 0.57 0.01 1.7 0.054 5 27 0.9934 3.57 0.84 12.5 7
9.5 0.735 0.1 2.1 0.079 6 31 0.9986 3.23 0.56 10.1 6
12.5 0.38 0.6 2.6 0.081 31 72 0.9996 3.1 0.73 10.5 5
9.3 0.48 0.29 2.1 0.127 6 16 0.9968 3.22 0.72 11.2 5
8.6 0.53 0.22 2 0.1 7 27 0.9967 3.2 0.56 10.2 6
11.9 0.39 0.69 2.8 0.095 17 35 0.9994 3.1 0.61 10.8 6
11.9 0.39 0.69 2.8 0.095 17 35 0.9994 3.1 0.61 10.8 6
8.4 0.37 0.53 1.8 0.413 9 26 0.9979 3.06 1.06 9.1 6
6.8 0.56 0.03 1.7 0.084 18 35 0.9968 3.44 0.63 10 6
10.4 0.33 0.63 2.8 0.084 5 22 0.9998 3.26 0.74 11.2 7
7 0.23 0.4 1.6 0.063 21 67 0.9952 3.5 0.63 11.1 5
11.3 0.62 0.67 5.2 0.086 6 19 0.9988 3.22 0.69 13.4 8
8.9 0.59 0.39 2.3 0.095 5 22 0.9986 3.37 0.58 10.3 5
9.2 0.63 0.21 2.7 0.097 29 65 0.9988 3.28 0.58 9.6 5
10.4 0.33 0.63 2.8 0.084 5 22 0.9998 3.26 0.74 11.2 7
11.6 0.58 0.66 2.2 0.074 10 47 1.0008 3.25 0.57 9 3
9.2 0.43 0.52 2.3 0.083 14 23 0.9976 3.35 0.61 11.3 6
8.3 0.615 0.22 2.6 0.087 6 19 0.9982 3.26 0.61 9.3 5
11 0.26 0.68 2.55 0.085 10 25 0.997 3.18 0.61 11.8 5
8.1 0.66 0.7 2.2 0.098 25 129 0.9972 3.08 0.53 9 5
11.5 0.315 0.54 2.1 0.084 5 15 0.9987 2.98 0.7 9.2 6
10 0.29 0.4 2.9 0.098 10 26 1.0006 3.48 0.91 9.7 5
10.3 0.5 0.42 2 0.069 21 51 0.9982 3.16 0.72 11.5 6
8.8 0.46 0.45 2.6 0.065 7 18 0.9947 3.32 0.79 14 6
11.4 0.36 0.69 2.1 0.09 6 21 1 3.17 0.62 9.2 6
8.7 0.82 0.02 1.2 0.07 36 48 0.9952 3.2 0.58 9.8 5
13 0.32 0.65 2.6 0.093 15 47 0.9996 3.05 0.61 10.6 5
9.6 0.54 0.42 2.4 0.081 25 52 0.997 3.2 0.71 11.4 6
12.5 0.37 0.55 2.6 0.083 25 68 0.9995 3.15 0.82 10.4 6
9.9 0.35 0.55 2.1 0.062 5 14 0.9971 3.26 0.79 10.6 5
10.5 0.28 0.51 1.7 0.08 10 24 0.9982 3.2 0.89 9.4 6
9.6 0.68 0.24 2.2 0.087 5 28 0.9988 3.14 0.6 10.2 5
9.3 0.27 0.41 2 0.091 6 16 0.998 3.28 0.7 9.7 5
10.4 0.24 0.49 1.8 0.075 6 20 0.9977 3.18 1.06 11 6
9.6 0.68 0.24 2.2 0.087 5 28 0.9988 3.14 0.6 10.2 5
9.4 0.685 0.11 2.7 0.077 6 31 0.9984 3.19 0.7 10.1 6
10.6 0.28 0.39 15.5 0.069 6 23 1.0026 3.12 0.66 9.2 5
9.4 0.3 0.56 2.8 0.08 6 17 0.9964 3.15 0.92 11.7 8
10.6 0.36 0.59 2.2 0.152 6 18 0.9986 3.04 1.05 9.4 5
10.6 0.36 0.6 2.2 0.152 7 18 0.9986 3.04 1.06 9.4 5
10.6 0.44 0.68 4.1 0.114 6 24 0.997 3.06 0.66 13.4 6
10.2 0.67 0.39 1.9 0.054 6 17 0.9976 3.17 0.47 10 5
10.2 0.67 0.39 1.9 0.054 6 17 0.9976 3.17 0.47 10 5
10.2 0.645 0.36 1.8 0.053 5 14 0.9982 3.17 0.42 10 6
11.6 0.32 0.55 2.8 0.081 35 67 1.0002 3.32 0.92 10.8 7
9.3 0.39 0.4 2.6 0.073 10 26 0.9984 3.34 0.75 10.2 6
9.3 0.775 0.27 2.8 0.078 24 56 0.9984 3.31 0.67 10.6 6
9.2 0.41 0.5 2.5 0.055 12 25 0.9952 3.34 0.79 13.3 7
8.9 0.4 0.51 2.6 0.052 13 27 0.995 3.32 0.9 13.4 7
8.7 0.69 0.31 3 0.086 23 81 1.0002 3.48 0.74 11.6 6
6.5 0.39 0.23 8.3 0.051 28 91 0.9952 3.44 0.55 12.1 6
10.7 0.35 0.53 2.6 0.07 5 16 0.9972 3.15 0.65 11 8
7.8 0.52 0.25 1.9 0.081 14 38 0.9984 3.43 0.65 9 6
7.2 0.34 0.32 2.5 0.09 43 113 0.9966 3.32 0.79 11.1 5
10.7 0.35 0.53 2.6 0.07 5 16 0.9972 3.15 0.65 11 8
8.7 0.69 0.31 3 0.086 23 81 1.0002 3.48 0.74 11.6 6
7.8 0.52 0.25 1.9 0.081 14 38 0.9984 3.43 0.65 9 6
10.4 0.44 0.73 6.55 0.074 38 76 0.999 3.17 0.85 12 7
10.4 0.44 0.73 6.55 0.074 38 76 0.999 3.17 0.85 12 7
10.5 0.26 0.47 1.9 0.078 6 24 0.9976 3.18 1.04 10.9 7
10.5 0.24 0.42 1.8 0.077 6 22 0.9976 3.21 1.05 10.8 7
10.2 0.49 0.63 2.9 0.072 10 26 0.9968 3.16 0.78 12.5 7
10.4 0.24 0.46 1.8 0.075 6 21 0.9976 3.25 1.02 10.8 7
11.2 0.67 0.55 2.3 0.084 6 13 1 3.17 0.71 9.5 6
10 0.59 0.31 2.2 0.09 26 62 0.9994 3.18 0.63 10.2 6
13.3 0.29 0.75 2.8 0.084 23 43 0.9986 3.04 0.68 11.4 7
12.4 0.42 0.49 4.6 0.073 19 43 0.9978 3.02 0.61 9.5 5
10 0.59 0.31 2.2 0.09 26 62 0.9994 3.18 0.63 10.2 6
10.7 0.4 0.48 2.1 0.125 15 49 0.998 3.03 0.81 9.7 6
10.5 0.51 0.64 2.4 0.107 6 15 0.9973 3.09 0.66 11.8 7
10.5 0.51 0.64 2.4 0.107 6 15 0.9973 3.09 0.66 11.8 7
8.5 0.655 0.49 6.1 0.122 34 151 1.001 3.31 1.14 9.3 5
12.5 0.6 0.49 4.3 0.1 5 14 1.001 3.25 0.74 11.9 6
10.4 0.61 0.49 2.1 0.2 5 16 0.9994 3.16 0.63 8.4 3
10.9 0.21 0.49 2.8 0.088 11 32 0.9972 3.22 0.68 11.7 6
7.3 0.365 0.49 2.5 0.088 39 106 0.9966 3.36 0.78 11 5
9.8 0.25 0.49 2.7 0.088 15 33 0.9982 3.42 0.9 10 6
7.6 0.41 0.49 2 0.088 16 43 0.998 3.48 0.64 9.1 5
8.2 0.39 0.49 2.3 0.099 47 133 0.9979 3.38 0.99 9.8 5
9.3 0.4 0.49 2.5 0.085 38 142 0.9978 3.22 0.55 9.4 5
9.2 0.43 0.49 2.4 0.086 23 116 0.9976 3.23 0.64 9.5 5
10.4 0.64 0.24 2.8 0.105 29 53 0.9998 3.24 0.67 9.9 5
7.3 0.365 0.49 2.5 0.088 39 106 0.9966 3.36 0.78 11 5
7 0.38 0.49 2.5 0.097 33 85 0.9962 3.39 0.77 11.4 6
8.2 0.42 0.49 2.6 0.084 32 55 0.9988 3.34 0.75 8.7 6
9.9 0.63 0.24 2.4 0.077 6 33 0.9974 3.09 0.57 9.4 5
9.1 0.22 0.24 2.1 0.078 1 28 0.999 3.41 0.87 10.3 6
11.9 0.38 0.49 2.7 0.098 12 42 1.0004 3.16 0.61 10.3 5
11.9 0.38 0.49 2.7 0.098 12 42 1.0004 3.16 0.61 10.3 5
10.3 0.27 0.24 2.1 0.072 15 33 0.9956 3.22 0.66 12.8 6
10 0.48 0.24 2.7 0.102 13 32 1 3.28 0.56 10 6
9.1 0.22 0.24 2.1 0.078 1 28 0.999 3.41 0.87 10.3 6
9.9 0.63 0.24 2.4 0.077 6 33 0.9974 3.09 0.57 9.4 5
8.1 0.825 0.24 2.1 0.084 5 13 0.9972 3.37 0.77 10.7 6
12.9 0.35 0.49 5.8 0.066 5 35 1.0014 3.2 0.66 12 7
11.2 0.5 0.74 5.15 0.1 5 17 0.9996 3.22 0.62 11.2 5
9.2 0.59 0.24 3.3 0.101 20 47 0.9988 3.26 0.67 9.6 5
9.5 0.46 0.49 6.3 0.064 5 17 0.9988 3.21 0.73 11 6
9.3 0.715 0.24 2.1 0.07 5 20 0.9966 3.12 0.59 9.9 5
11.2 0.66 0.24 2.5 0.085 16 53 0.9993 3.06 0.72 11 6
14.3 0.31 0.74 1.8 0.075 6 15 1.0008 2.86 0.79 8.4 6
9.1 0.47 0.49 2.6 0.094 38 106 0.9982 3.08 0.59 9.1 5
7.5 0.55 0.24 2 0.078 10 28 0.9983 3.45 0.78 9.5 6
10.6 0.31 0.49 2.5 0.067 6 21 0.9987 3.26 0.86 10.7 6
12.4 0.35 0.49 2.6 0.079 27 69 0.9994 3.12 0.75 10.4 6
9 0.53 0.49 1.9 0.171 6 25 0.9975 3.27 0.61 9.4 6
6.8 0.51 0.01 2.1 0.074 9 25 0.9958 3.33 0.56 9.5 6
9.4 0.43 0.24 2.8 0.092 14 45 0.998 3.19 0.73 10 6
9.5 0.46 0.24 2.7 0.092 14 44 0.998 3.12 0.74 10 6
5 1.04 0.24 1.6 0.05 32 96 0.9934 3.74 0.62 11.5 5
15.5 0.645 0.49 4.2 0.095 10 23 1.00315 2.92 0.74 11.1 5
15.5 0.645 0.49 4.2 0.095 10 23 1.00315 2.92 0.74 11.1 5
10.9 0.53 0.49 4.6 0.118 10 17 1.0002 3.07 0.56 11.7 6
15.6 0.645 0.49 4.2 0.095 10 23 1.00315 2.92 0.74 11.1 5
10.9 0.53 0.49 4.6 0.118 10 17 1.0002 3.07 0.56 11.7 6
13 0.47 0.49 4.3 0.085 6 47 1.0021 3.3 0.68 12.7 6
12.7 0.6 0.49 2.8 0.075 5 19 0.9994 3.14 0.57 11.4 5
9 0.44 0.49 2.4 0.078 26 121 0.9978 3.23 0.58 9.2 5
9 0.54 0.49 2.9 0.094 41 110 0.9982 3.08 0.61 9.2 5
7.6 0.29 0.49 2.7 0.092 25 60 0.9971 3.31 0.61 10.1 6
13 0.47 0.49 4.3 0.085 6 47 1.0021 3.3 0.68 12.7 6
12.7 0.6 0.49 2.8 0.075 5 19 0.9994 3.14 0.57 11.4 5
8.7 0.7 0.24 2.5 0.226 5 15 0.9991 3.32 0.6 9 6
8.7 0.7 0.24 2.5 0.226 5 15 0.9991 3.32 0.6 9 6
9.8 0.5 0.49 2.6 0.25 5 20 0.999 3.31 0.79 10.7 6
6.2 0.36 0.24 2.2 0.095 19 42 0.9946 3.57 0.57 11.7 6
11.5 0.35 0.49 3.3 0.07 10 37 1.0003 3.32 0.91 11 6
6.2 0.36 0.24 2.2 0.095 19 42 0.9946 3.57 0.57 11.7 6
10.2 0.24 0.49 2.4 0.075 10 28 0.9978 3.14 0.61 10.4 5
10.5 0.59 0.49 2.1 0.07 14 47 0.9991 3.3 0.56 9.6 4
10.6 0.34 0.49 3.2 0.078 20 78 0.9992 3.19 0.7 10 6
12.3 0.27 0.49 3.1 0.079 28 46 0.9993 3.2 0.8 10.2 6
9.9 0.5 0.24 2.3 0.103 6 14 0.9978 3.34 0.52 10 4
8.8 0.44 0.49 2.8 0.083 18 111 0.9982 3.3 0.6 9.5 5
8.8 0.47 0.49 2.9 0.085 17 110 0.9982 3.29 0.6 9.8 5
10.6 0.31 0.49 2.2 0.063 18 40 0.9976 3.14 0.51 9.8 6
12.3 0.5 0.49 2.2 0.089 5 14 1.0002 3.19 0.44 9.6 5
12.3 0.5 0.49 2.2 0.089 5 14 1.0002 3.19 0.44 9.6 5
11.7 0.49 0.49 2.2 0.083 5 15 1 3.19 0.43 9.2 5
12 0.28 0.49 1.9 0.074 10 21 0.9976 2.98 0.66 9.9 7
11.8 0.33 0.49 3.4 0.093 54 80 1.0002 3.3 0.76 10.7 7
7.6 0.51 0.24 2.4 0.091 8 38 0.998 3.47 0.66 9.6 6
11.1 0.31 0.49 2.7 0.094 16 47 0.9986 3.12 1.02 10.6 7
7.3 0.73 0.24 1.9 0.108 18 102 0.9967 3.26 0.59 9.3 5
5 0.42 0.24 2 0.06 19 50 0.9917 3.72 0.74 14 8
10.2 0.29 0.49 2.6 0.059 5 13 0.9976 3.05 0.74 10.5 7
9 0.45 0.49 2.6 0.084 21 75 0.9987 3.35 0.57 9.7 5
6.6 0.39 0.49 1.7 0.07 23 149 0.9922 3.12 0.5 11.5 6
9 0.45 0.49 2.6 0.084 21 75 0.9987 3.35 0.57 9.7 5
9.9 0.49 0.58 3.5 0.094 9 43 1.0004 3.29 0.58 9 5
7.9 0.72 0.17 2.6 0.096 20 38 0.9978 3.4 0.53 9.5 5
8.9 0.595 0.41 7.9 0.086 30 109 0.9998 3.27 0.57 9.3 5
12.4 0.4 0.51 2 0.059 6 24 0.9994 3.04 0.6 9.3 6
11.9 0.58 0.58 1.9 0.071 5 18 0.998 3.09 0.63 10 6
8.5 0.585 0.18 2.1 0.078 5 30 0.9967 3.2 0.48 9.8 6
12.7 0.59 0.45 2.3 0.082 11 22 1 3 0.7 9.3 6
8.2 0.915 0.27 2.1 0.088 7 23 0.9962 3.26 0.47 10 4
13.2 0.46 0.52 2.2 0.071 12 35 1.0006 3.1 0.56 9 6
7.7 0.835 0 2.6 0.081 6 14 0.9975 3.3 0.52 9.3 5
13.2 0.46 0.52 2.2 0.071 12 35 1.0006 3.1 0.56 9 6
8.3 0.58 0.13 2.9 0.096 14 63 0.9984 3.17 0.62 9.1 6
8.3 0.6 0.13 2.6 0.085 6 24 0.9984 3.31 0.59 9.2 6
9.4 0.41 0.48 4.6 0.072 10 20 0.9973 3.34 0.79 12.2 7
8.8 0.48 0.41 3.3 0.092 26 52 0.9982 3.31 0.53 10.5 6
10.1 0.65 0.37 5.1 0.11 11 65 1.0026 3.32 0.64 10.4 6
6.3 0.36 0.19 3.2 0.075 15 39 0.9956 3.56 0.52 12.7 6
8.8 0.24 0.54 2.5 0.083 25 57 0.9983 3.39 0.54 9.2 5
13.2 0.38 0.55 2.7 0.081 5 16 1.0006 2.98 0.54 9.4 5
7.5 0.64 0 2.4 0.077 18 29 0.9965 3.32 0.6 10 6
8.2 0.39 0.38 1.5 0.058 10 29 0.9962 3.26 0.74 9.8 5
9.2 0.755 0.18 2.2 0.148 10 103 0.9969 2.87 1.36 10.2 6
9.6 0.6 0.5 2.3 0.079 28 71 0.9997 3.5 0.57 9.7 5
9.6 0.6 0.5 2.3 0.079 28 71 0.9997 3.5 0.57 9.7 5
11.5 0.31 0.51 2.2 0.079 14 28 0.9982 3.03 0.93 9.8 6
11.4 0.46 0.5 2.7 0.122 4 17 1.0006 3.13 0.7 10.2 5
11.3 0.37 0.41 2.3 0.088 6 16 0.9988 3.09 0.8 9.3 5
8.3 0.54 0.24 3.4 0.076 16 112 0.9976 3.27 0.61 9.4 5
8.2 0.56 0.23 3.4 0.078 14 104 0.9976 3.28 0.62 9.4 5
10 0.58 0.22 1.9 0.08 9 32 0.9974 3.13 0.55 9.5 5
7.9 0.51 0.25 2.9 0.077 21 45 0.9974 3.49 0.96 12.1 6
6.8 0.69 0 5.6 0.124 21 58 0.9997 3.46 0.72 10.2 5
6.8 0.69 0 5.6 0.124 21 58 0.9997 3.46 0.72 10.2 5
8.8 0.6 0.29 2.2 0.098 5 15 0.9988 3.36 0.49 9.1 5
8.8 0.6 0.29 2.2 0.098 5 15 0.9988 3.36 0.49 9.1 5
8.7 0.54 0.26 2.5 0.097 7 31 0.9976 3.27 0.6 9.3 6
7.6 0.685 0.23 2.3 0.111 20 84 0.9964 3.21 0.61 9.3 5
8.7 0.54 0.26 2.5 0.097 7 31 0.9976 3.27 0.6 9.3 6
10.4 0.28 0.54 2.7 0.105 5 19 0.9988 3.25 0.63 9.5 5
7.6 0.41 0.14 3 0.087 21 43 0.9964 3.32 0.57 10.5 6
10.1 0.935 0.22 3.4 0.105 11 86 1.001 3.43 0.64 11.3 4
7.9 0.35 0.21 1.9 0.073 46 102 0.9964 3.27 0.58 9.5 5
8.7 0.84 0 1.4 0.065 24 33 0.9954 3.27 0.55 9.7 5
9.6 0.88 0.28 2.4 0.086 30 147 0.9979 3.24 0.53 9.4 5
9.5 0.885 0.27 2.3 0.084 31 145 0.9978 3.24 0.53 9.4 5
7.7 0.915 0.12 2.2 0.143 7 23 0.9964 3.35 0.65 10.2 7
8.9 0.29 0.35 1.9 0.067 25 57 0.997 3.18 1.36 10.3 6
9.9 0.54 0.45 2.3 0.071 16 40 0.9991 3.39 0.62 9.4 5
9.5 0.59 0.44 2.3 0.071 21 68 0.9992 3.46 0.63 9.5 5
9.9 0.54 0.45 2.3 0.071 16 40 0.9991 3.39 0.62 9.4 5
9.5 0.59 0.44 2.3 0.071 21 68 0.9992 3.46 0.63 9.5 5
9.9 0.54 0.45 2.3 0.071 16 40 0.9991 3.39 0.62 9.4 5
7.8 0.64 0.1 6 0.115 5 11 0.9984 3.37 0.69 10.1 7
7.3 0.67 0.05 3.6 0.107 6 20 0.9972 3.4 0.63 10.1 5
8.3 0.845 0.01 2.2 0.07 5 14 0.9967 3.32 0.58 11 4
8.7 0.48 0.3 2.8 0.066 10 28 0.9964 3.33 0.67 11.2 7
6.7 0.42 0.27 8.6 0.068 24 148 0.9948 3.16 0.57 11.3 6
10.7 0.43 0.39 2.2 0.106 8 32 0.9986 2.89 0.5 9.6 5
9.8 0.88 0.25 2.5 0.104 35 155 1.001 3.41 0.67 11.2 5
15.9 0.36 0.65 7.5 0.096 22 71 0.9976 2.98 0.84 14.9 5
9.4 0.33 0.59 2.8 0.079 9 30 0.9976 3.12 0.54 12 6
8.6 0.47 0.47 2.4 0.074 7 29 0.9979 3.08 0.46 9.5 5
9.7 0.55 0.17 2.9 0.087 20 53 1.0004 3.14 0.61 9.4 5
10.7 0.43 0.39 2.2 0.106 8 32 0.9986 2.89 0.5 9.6 5
12 0.5 0.59 1.4 0.073 23 42 0.998 2.92 0.68 10.5 7
7.2 0.52 0.07 1.4 0.074 5 20 0.9973 3.32 0.81 9.6 6
7.1 0.84 0.02 4.4 0.096 5 13 0.997 3.41 0.57 11 4
7.2 0.52 0.07 1.4 0.074 5 20 0.9973 3.32 0.81 9.6 6
7.5 0.42 0.31 1.6 0.08 15 42 0.9978 3.31 0.64 9 5
7.2 0.57 0.06 1.6 0.076 9 27 0.9972 3.36 0.7 9.6 6
10.1 0.28 0.46 1.8 0.05 5 13 0.9974 3.04 0.79 10.2 6
12.1 0.4 0.52 2 0.092 15 54 1 3.03 0.66 10.2 5
9.4 0.59 0.14 2 0.084 25 48 0.9981 3.14 0.56 9.7 5
8.3 0.49 0.36 1.8 0.222 6 16 0.998 3.18 0.6 9.5 6
11.3 0.34 0.45 2 0.082 6 15 0.9988 2.94 0.66 9.2 6
10 0.73 0.43 2.3 0.059 15 31 0.9966 3.15 0.57 11 5
11.3 0.34 0.45 2 0.082 6 15 0.9988 2.94 0.66 9.2 6
6.9 0.4 0.24 2.5 0.083 30 45 0.9959 3.26 0.58 10 5
8.2 0.73 0.21 1.7 0.074 5 13 0.9968 3.2 0.52 9.5 5
9.8 1.24 0.34 2 0.079 32 151 0.998 3.15 0.53 9.5 5
8.2 0.73 0.21 1.7 0.074 5 13 0.9968 3.2 0.52 9.5 5
10.8 0.4 0.41 2.2 0.084 7 17 0.9984 3.08 0.67 9.3 6
9.3 0.41 0.39 2.2 0.064 12 31 0.9984 3.26 0.65 10.2 5
10.8 0.4 0.41 2.2 0.084 7 17 0.9984 3.08 0.67 9.3 6
8.6 0.8 0.11 2.3 0.084 12 31 0.9979 3.4 0.48 9.9 5
8.3 0.78 0.1 2.6 0.081 45 87 0.9983 3.48 0.53 10 5
10.8 0.26 0.45 3.3 0.06 20 49 0.9972 3.13 0.54 9.6 5
13.3 0.43 0.58 1.9 0.07 15 40 1.0004 3.06 0.49 9 5
8 0.45 0.23 2.2 0.094 16 29 0.9962 3.21 0.49 10.2 6
8.5 0.46 0.31 2.25 0.078 32 58 0.998 3.33 0.54 9.8 5
8.1 0.78 0.23 2.6 0.059 5 15 0.997 3.37 0.56 11.3 5
9.8 0.98 0.32 2.3 0.078 35 152 0.998 3.25 0.48 9.4 5
8.1 0.78 0.23 2.6 0.059 5 15 0.997 3.37 0.56 11.3 5
7.1 0.65 0.18 1.8 0.07 13 40 0.997 3.44 0.6 9.1 5
9.1 0.64 0.23 3.1 0.095 13 38 0.9998 3.28 0.59 9.7 5
7.7 0.66 0.04 1.6 0.039 4 9 0.9962 3.4 0.47 9.4 5
8.1 0.38 0.48 1.8 0.157 5 17 0.9976 3.3 1.05 9.4 5
7.4 1.185 0 4.25 0.097 5 14 0.9966 3.63 0.54 10.7 3
9.2 0.92 0.24 2.6 0.087 12 93 0.9998 3.48 0.54 9.8 5
8.6 0.49 0.51 2 0.422 16 62 0.9979 3.03 1.17 9 5
9 0.48 0.32 2.8 0.084 21 122 0.9984 3.32 0.62 9.4 5
9 0.47 0.31 2.7 0.084 24 125 0.9984 3.31 0.61 9.4 5
5.1 0.47 0.02 1.3 0.034 18 44 0.9921 3.9 0.62 12.8 6
7 0.65 0.02 2.1 0.066 8 25 0.9972 3.47 0.67 9.5 6
7 0.65 0.02 2.1 0.066 8 25 0.9972 3.47 0.67 9.5 6
9.4 0.615 0.28 3.2 0.087 18 72 1.0001 3.31 0.53 9.7 5
11.8 0.38 0.55 2.1 0.071 5 19 0.9986 3.11 0.62 10.8 6
10.6 1.02 0.43 2.9 0.076 26 88 0.9984 3.08 0.57 10.1 6
7 0.65 0.02 2.1 0.066 8 25 0.9972 3.47 0.67 9.5 6
7 0.64 0.02 2.1 0.067 9 23 0.997 3.47 0.67 9.4 6
7.5 0.38 0.48 2.6 0.073 22 84 0.9972 3.32 0.7 9.6 4
9.1 0.765 0.04 1.6 0.078 4 14 0.998 3.29 0.54 9.7 4
8.4 1.035 0.15 6 0.073 11 54 0.999 3.37 0.49 9.9 5
7 0.78 0.08 2 0.093 10 19 0.9956 3.4 0.47 10 5
7.4 0.49 0.19 3 0.077 16 37 0.9966 3.37 0.51 10.5 5
7.8 0.545 0.12 2.5 0.068 11 35 0.996 3.34 0.61 11.6 6
9.7 0.31 0.47 1.6 0.062 13 33 0.9983 3.27 0.66 10 6
10.6 1.025 0.43 2.8 0.08 21 84 0.9985 3.06 0.57 10.1 5
8.9 0.565 0.34 3 0.093 16 112 0.9998 3.38 0.61 9.5 5
8.7 0.69 0 3.2 0.084 13 33 0.9992 3.36 0.45 9.4 5
8 0.43 0.36 2.3 0.075 10 48 0.9976 3.34 0.46 9.4 5
9.9 0.74 0.28 2.6 0.078 21 77 0.998 3.28 0.51 9.8 5
7.2 0.49 0.18 2.7 0.069 13 34 0.9967 3.29 0.48 9.2 6
8 0.43 0.36 2.3 0.075 10 48 0.9976 3.34 0.46 9.4 5
7.6 0.46 0.11 2.6 0.079 12 49 0.9968 3.21 0.57 10 5
8.4 0.56 0.04 2 0.082 10 22 0.9976 3.22 0.44 9.6 5
7.1 0.66 0 3.9 0.086 17 45 0.9976 3.46 0.54 9.5 5
8.4 0.56 0.04 2 0.082 10 22 0.9976 3.22 0.44 9.6 5
8.9 0.48 0.24 2.85 0.094 35 106 0.9982 3.1 0.53 9.2 5
7.6 0.42 0.08 2.7 0.084 15 48 0.9968 3.21 0.59 10 5
7.1 0.31 0.3 2.2 0.053 36 127 0.9965 2.94 1.62 9.5 5
7.5 1.115 0.1 3.1 0.086 5 12 0.9958 3.54 0.6 11.2 4
9 0.66 0.17 3 0.077 5 13 0.9976 3.29 0.55 10.4 5
8.1 0.72 0.09 2.8 0.084 18 49 0.9994 3.43 0.72 11.1 6
6.4 0.57 0.02 1.8 0.067 4 11 0.997 3.46 0.68 9.5 5
6.4 0.57 0.02 1.8 0.067 4 11 0.997 3.46 0.68 9.5 5
6.4 0.865 0.03 3.2 0.071 27 58 0.995 3.61 0.49 12.7 6
9.5 0.55 0.66 2.3 0.387 12 37 0.9982 3.17 0.67 9.6 5
8.9 0.875 0.13 3.45 0.088 4 14 0.9994 3.44 0.52 11.5 5
7.3 0.835 0.03 2.1 0.092 10 19 0.9966 3.39 0.47 9.6 5
7 0.45 0.34 2.7 0.082 16 72 0.998 3.55 0.6 9.5 5
7.7 0.56 0.2 2 0.075 9 39 0.9987 3.48 0.62 9.3 5
7.7 0.965 0.1 2.1 0.112 11 22 0.9963 3.26 0.5 9.5 5
7.7 0.965 0.1 2.1 0.112 11 22 0.9963 3.26 0.5 9.5 5
8.2 0.59 0 2.5 0.093 19 58 1.0002 3.5 0.65 9.3 6
9 0.46 0.23 2.8 0.092 28 104 0.9983 3.1 0.56 9.2 5
9 0.69 0 2.4 0.088 19 38 0.999 3.35 0.6 9.3 5
8.3 0.76 0.29 4.2 0.075 12 16 0.9965 3.45 0.68 11.5 6
9.2 0.53 0.24 2.6 0.078 28 139 0.99788 3.21 0.57 9.5 5
6.5 0.615 0 1.9 0.065 9 18 0.9972 3.46 0.65 9.2 5
11.6 0.41 0.58 2.8 0.096 25 101 1.00024 3.13 0.53 10 5
11.1 0.39 0.54 2.7 0.095 21 101 1.0001 3.13 0.51 9.5 5
7.3 0.51 0.18 2.1 0.07 12 28 0.99768 3.52 0.73 9.5 6
8.2 0.34 0.38 2.5 0.08 12 57 0.9978 3.3 0.47 9 6
8.6 0.33 0.4 2.6 0.083 16 68 0.99782 3.3 0.48 9.4 5
7.2 0.5 0.18 2.1 0.071 12 31 0.99761 3.52 0.72 9.6 6
7.3 0.51 0.18 2.1 0.07 12 28 0.99768 3.52 0.73 9.5 6
8.3 0.65 0.1 2.9 0.089 17 40 0.99803 3.29 0.55 9.5 5
8.3 0.65 0.1 2.9 0.089 17 40 0.99803 3.29 0.55 9.5 5
7.6 0.54 0.13 2.5 0.097 24 66 0.99785 3.39 0.61 9.4 5
8.3 0.65 0.1 2.9 0.089 17 40 0.99803 3.29 0.55 9.5 5
7.8 0.48 0.68 1.7 0.415 14 32 0.99656 3.09 1.06 9.1 6
7.8 0.91 0.07 1.9 0.058 22 47 0.99525 3.51 0.43 10.7 6
6.3 0.98 0.01 2 0.057 15 33 0.99488 3.6 0.46 11.2 6
8.1 0.87 0 2.2 0.084 10 31 0.99656 3.25 0.5 9.8 5
8.1 0.87 0 2.2 0.084 10 31 0.99656 3.25 0.5 9.8 5
8.8 0.42 0.21 2.5 0.092 33 88 0.99823 3.19 0.52 9.2 5
9 0.58 0.25 2.8 0.075 9 104 0.99779 3.23 0.57 9.7 5
9.3 0.655 0.26 2 0.096 5 35 0.99738 3.25 0.42 9.6 5
8.8 0.7 0 1.7 0.069 8 19 0.99701 3.31 0.53 10 6
9.3 0.655 0.26 2 0.096 5 35 0.99738 3.25 0.42 9.6 5
9.1 0.68 0.11 2.8 0.093 11 44 0.99888 3.31 0.55 9.5 6
9.2 0.67 0.1 3 0.091 12 48 0.99888 3.31 0.54 9.5 6
8.8 0.59 0.18 2.9 0.089 12 74 0.99738 3.14 0.54 9.4 5
7.5 0.6 0.32 2.7 0.103 13 98 0.99938 3.45 0.62 9.5 5
7.1 0.59 0.02 2.3 0.082 24 94 0.99744 3.55 0.53 9.7 6
7.9 0.72 0.01 1.9 0.076 7 32 0.99668 3.39 0.54 9.6 5
7.1 0.59 0.02 2.3 0.082 24 94 0.99744 3.55 0.53 9.7 6
9.4 0.685 0.26 2.4 0.082 23 143 0.9978 3.28 0.55 9.4 5
9.5 0.57 0.27 2.3 0.082 23 144 0.99782 3.27 0.55 9.4 5
7.9 0.4 0.29 1.8 0.157 1 44 0.9973 3.3 0.92 9.5 6
7.9 0.4 0.3 1.8 0.157 2 45 0.99727 3.31 0.91 9.5 6
7.2 1 0 3 0.102 7 16 0.99586 3.43 0.46 10 5
6.9 0.765 0.18 2.4 0.243 5.5 48 0.99612 3.4 0.6 10.3 6
6.9 0.635 0.17 2.4 0.241 6 18 0.9961 3.4 0.59 10.3 6
8.3 0.43 0.3 3.4 0.079 7 34 0.99788 3.36 0.61 10.5 5
7.1 0.52 0.03 2.6 0.076 21 92 0.99745 3.5 0.6 9.8 5
7 0.57 0 2 0.19 12 45 0.99676 3.31 0.6 9.4 6
6.5 0.46 0.14 2.4 0.114 9 37 0.99732 3.66 0.65 9.8 5
9 0.82 0.05 2.4 0.081 26 96 0.99814 3.36 0.53 10 5
6.5 0.46 0.14 2.4 0.114 9 37 0.99732 3.66 0.65 9.8 5
7.1 0.59 0.01 2.5 0.077 20 85 0.99746 3.55 0.59 9.8 5
9.9 0.35 0.41 2.3 0.083 11 61 0.9982 3.21 0.5 9.5 5
9.9 0.35 0.41 2.3 0.083 11 61 0.9982 3.21 0.5 9.5 5
10 0.56 0.24 2.2 0.079 19 58 0.9991 3.18 0.56 10.1 6
10 0.56 0.24 2.2 0.079 19 58 0.9991 3.18 0.56 10.1 6
8.6 0.63 0.17 2.9 0.099 21 119 0.998 3.09 0.52 9.3 5
7.4 0.37 0.43 2.6 0.082 18 82 0.99708 3.33 0.68 9.7 6
8.8 0.64 0.17 2.9 0.084 25 130 0.99818 3.23 0.54 9.6 5
7.1 0.61 0.02 2.5 0.081 17 87 0.99745 3.48 0.6 9.7 6
7.7 0.6 0 2.6 0.055 7 13 0.99639 3.38 0.56 10.8 5
10.1 0.27 0.54 2.3 0.065 7 26 0.99531 3.17 0.53 12.5 6
10.8 0.89 0.3 2.6 0.132 7 60 0.99786 2.99 1.18 10.2 5
8.7 0.46 0.31 2.5 0.126 24 64 0.99746 3.1 0.74 9.6 5
9.3 0.37 0.44 1.6 0.038 21 42 0.99526 3.24 0.81 10.8 7
9.4 0.5 0.34 3.6 0.082 5 14 0.9987 3.29 0.52 10.7 6
9.4 0.5 0.34 3.6 0.082 5 14 0.9987 3.29 0.52 10.7 6
7.2 0.61 0.08 4 0.082 26 108 0.99641 3.25 0.51 9.4 5
8.6 0.55 0.09 3.3 0.068 8 17 0.99735 3.23 0.44 10 5
5.1 0.585 0 1.7 0.044 14 86 0.99264 3.56 0.94 12.9 7
7.7 0.56 0.08 2.5 0.114 14 46 0.9971 3.24 0.66 9.6 6
8.4 0.52 0.22 2.7 0.084 4 18 0.99682 3.26 0.57 9.9 6
8.2 0.28 0.4 2.4 0.052 4 10 0.99356 3.33 0.7 12.8 7
8.4 0.25 0.39 2 0.041 4 10 0.99386 3.27 0.71 12.5 7
8.2 0.28 0.4 2.4 0.052 4 10 0.99356 3.33 0.7 12.8 7
7.4 0.53 0.12 1.9 0.165 4 12 0.99702 3.26 0.86 9.2 5
7.6 0.48 0.31 2.8 0.07 4 15 0.99693 3.22 0.55 10.3 6
7.3 0.49 0.1 2.6 0.068 4 14 0.99562 3.3 0.47 10.5 5
12.9 0.5 0.55 2.8 0.072 7 24 1.00012 3.09 0.68 10.9 6
10.8 0.45 0.33 2.5 0.099 20 38 0.99818 3.24 0.71 10.8 5
6.9 0.39 0.24 2.1 0.102 4 7 0.99462 3.44 0.58 11.4 4
12.6 0.41 0.54 2.8 0.103 19 41 0.99939 3.21 0.76 11.3 6
10.8 0.45 0.33 2.5 0.099 20 38 0.99818 3.24 0.71 10.8 5
9.8 0.51 0.19 3.2 0.081 8 30 0.9984 3.23 0.58 10.5 6
10.8 0.29 0.42 1.6 0.084 19 27 0.99545 3.28 0.73 11.9 6
7.1 0.715 0 2.35 0.071 21 47 0.99632 3.29 0.45 9.4 5
9.1 0.66 0.15 3.2 0.097 9 59 0.99976 3.28 0.54 9.6 5
7 0.685 0 1.9 0.099 9 22 0.99606 3.34 0.6 9.7 5
4.9 0.42 0 2.1 0.048 16 42 0.99154 3.71 0.74 14 7
6.7 0.54 0.13 2 0.076 15 36 0.9973 3.61 0.64 9.8 5
6.7 0.54 0.13 2 0.076 15 36 0.9973 3.61 0.64 9.8 5
7.1 0.48 0.28 2.8 0.068 6 16 0.99682 3.24 0.53 10.3 5
7.1 0.46 0.14 2.8 0.076 15 37 0.99624 3.36 0.49 10.7 5
7.5 0.27 0.34 2.3 0.05 4 8 0.9951 3.4 0.64 11 7
7.1 0.46 0.14 2.8 0.076 15 37 0.99624 3.36 0.49 10.7 5
7.8 0.57 0.09 2.3 0.065 34 45 0.99417 3.46 0.74 12.7 8
5.9 0.61 0.08 2.1 0.071 16 24 0.99376 3.56 0.77 11.1 6
7.5 0.685 0.07 2.5 0.058 5 9 0.99632 3.38 0.55 10.9 4
5.9 0.61 0.08 2.1 0.071 16 24 0.99376 3.56 0.77 11.1 6
10.4 0.44 0.42 1.5 0.145 34 48 0.99832 3.38 0.86 9.9 3
11.6 0.47 0.44 1.6 0.147 36 51 0.99836 3.38 0.86 9.9 4
8.8 0.685 0.26 1.6 0.088 16 23 0.99694 3.32 0.47 9.4 5
7.6 0.665 0.1 1.5 0.066 27 55 0.99655 3.39 0.51 9.3 5
6.7 0.28 0.28 2.4 0.012 36 100 0.99064 3.26 0.39 11.7 7
6.7 0.28 0.28 2.4 0.012 36 100 0.99064 3.26 0.39 11.7 7
10.1 0.31 0.35 1.6 0.075 9 28 0.99672 3.24 0.83 11.2 7
6 0.5 0.04 2.2 0.092 13 26 0.99647 3.46 0.47 10 5
11.1 0.42 0.47 2.65 0.085 9 34 0.99736 3.24 0.77 12.1 7
6.6 0.66 0 3 0.115 21 31 0.99629 3.45 0.63 10.3 5
10.6 0.5 0.45 2.6 0.119 34 68 0.99708 3.23 0.72 10.9 6
7.1 0.685 0.35 2 0.088 9 92 0.9963 3.28 0.62 9.4 5
9.9 0.25 0.46 1.7 0.062 26 42 0.9959 3.18 0.83 10.6 6
6.4 0.64 0.21 1.8 0.081 14 31 0.99689 3.59 0.66 9.8 5
6.4 0.64 0.21 1.8 0.081 14 31 0.99689 3.59 0.66 9.8 5
7.4 0.68 0.16 1.8 0.078 12 39 0.9977 3.5 0.7 9.9 6
6.4 0.64 0.21 1.8 0.081 14 31 0.99689 3.59 0.66 9.8 5
6.4 0.63 0.21 1.6 0.08 12 32 0.99689 3.58 0.66 9.8 5
9.3 0.43 0.44 1.9 0.085 9 22 0.99708 3.28 0.55 9.5 5
9.3 0.43 0.44 1.9 0.085 9 22 0.99708 3.28 0.55 9.5 5
8 0.42 0.32 2.5 0.08 26 122 0.99801 3.22 1.07 9.7 5
9.3 0.36 0.39 1.5 0.08 41 55 0.99652 3.47 0.73 10.9 6
9.3 0.36 0.39 1.5 0.08 41 55 0.99652 3.47 0.73 10.9 6
7.6 0.735 0.02 2.5 0.071 10 14 0.99538 3.51 0.71 11.7 7
9.3 0.36 0.39 1.5 0.08 41 55 0.99652 3.47 0.73 10.9 6
8.2 0.26 0.34 2.5 0.073 16 47 0.99594 3.4 0.78 11.3 7
11.7 0.28 0.47 1.7 0.054 17 32 0.99686 3.15 0.67 10.6 7
6.8 0.56 0.22 1.8 0.074 15 24 0.99438 3.4 0.82 11.2 6
7.2 0.62 0.06 2.7 0.077 15 85 0.99746 3.51 0.54 9.5 5
5.8 1.01 0.66 2 0.039 15 88 0.99357 3.66 0.6 11.5 6
7.5 0.42 0.32 2.7 0.067 7 25 0.99628 3.24 0.44 10.4 5
7.2 0.62 0.06 2.5 0.078 17 84 0.99746 3.51 0.53 9.7 5
7.2 0.62 0.06 2.7 0.077 15 85 0.99746 3.51 0.54 9.5 5
7.2 0.635 0.07 2.6 0.077 16 86 0.99748 3.51 0.54 9.7 5
6.8 0.49 0.22 2.3 0.071 13 24 0.99438 3.41 0.83 11.3 6
6.9 0.51 0.23 2 0.072 13 22 0.99438 3.4 0.84 11.2 6
6.8 0.56 0.22 1.8 0.074 15 24 0.99438 3.4 0.82 11.2 6
7.6 0.63 0.03 2 0.08 27 43 0.99578 3.44 0.64 10.9 6
7.7 0.715 0.01 2.1 0.064 31 43 0.99371 3.41 0.57 11.8 6
6.9 0.56 0.03 1.5 0.086 36 46 0.99522 3.53 0.57 10.6 5
7.3 0.35 0.24 2 0.067 28 48 0.99576 3.43 0.54 10 4
9.1 0.21 0.37 1.6 0.067 6 10 0.99552 3.23 0.58 11.1 7
10.4 0.38 0.46 2.1 0.104 6 10 0.99664 3.12 0.65 11.8 7
8.8 0.31 0.4 2.8 0.109 7 16 0.99614 3.31 0.79 11.8 7
7.1 0.47 0 2.2 0.067 7 14 0.99517 3.4 0.58 10.9 4
7.7 0.715 0.01 2.1 0.064 31 43 0.99371 3.41 0.57 11.8 6
8.8 0.61 0.19 4 0.094 30 69 0.99787 3.22 0.5 10 6
7.2 0.6 0.04 2.5 0.076 18 88 0.99745 3.53 0.55 9.5 5
9.2 0.56 0.18 1.6 0.078 10 21 0.99576 3.15 0.49 9.9 5
7.6 0.715 0 2.1 0.068 30 35 0.99533 3.48 0.65 11.4 6
8.4 0.31 0.29 3.1 0.194 14 26 0.99536 3.22 0.78 12 6
7.2 0.6 0.04 2.5 0.076 18 88 0.99745 3.53 0.55 9.5 5
8.8 0.61 0.19 4 0.094 30 69 0.99787 3.22 0.5 10 6
8.9 0.75 0.14 2.5 0.086 9 30 0.99824 3.34 0.64 10.5 5
9 0.8 0.12 2.4 0.083 8 28 0.99836 3.33 0.65 10.4 6
10.7 0.52 0.38 2.6 0.066 29 56 0.99577 3.15 0.79 12.1 7
6.8 0.57 0 2.5 0.072 32 64 0.99491 3.43 0.56 11.2 6
10.7 0.9 0.34 6.6 0.112 23 99 1.00289 3.22 0.68 9.3 5
7.2 0.34 0.24 2 0.071 30 52 0.99576 3.44 0.58 10.1 5
7.2 0.66 0.03 2.3 0.078 16 86 0.99743 3.53 0.57 9.7 5
10.1 0.45 0.23 1.9 0.082 10 18 0.99774 3.22 0.65 9.3 6
7.2 0.66 0.03 2.3 0.078 16 86 0.99743 3.53 0.57 9.7 5
7.2 0.63 0.03 2.2 0.08 17 88 0.99745 3.53 0.58 9.8 6
7.1 0.59 0.01 2.3 0.08 27 43 0.9955 3.42 0.58 10.7 6
8.3 0.31 0.39 2.4 0.078 17 43 0.99444 3.31 0.77 12.5 7
7.1 0.59 0.01 2.3 0.08 27 43 0.9955 3.42 0.58 10.7 6
8.3 0.31 0.39 2.4 0.078 17 43 0.99444 3.31 0.77 12.5 7
8.3 1.02 0.02 3.4 0.084 6 11 0.99892 3.48 0.49 11 3
8.9 0.31 0.36 2.6 0.056 10 39 0.99562 3.4 0.69 11.8 5
7.4 0.635 0.1 2.4 0.08 16 33 0.99736 3.58 0.69 10.8 7
7.4 0.635 0.1 2.4 0.08 16 33 0.99736 3.58 0.69 10.8 7
6.8 0.59 0.06 6 0.06 11 18 0.9962 3.41 0.59 10.8 7
6.8 0.59 0.06 6 0.06 11 18 0.9962 3.41 0.59 10.8 7
9.2 0.58 0.2 3 0.081 15 115 0.998 3.23 0.59 9.5 5
7.2 0.54 0.27 2.6 0.084 12 78 0.9964 3.39 0.71 11 5
6.1 0.56 0 2.2 0.079 6 9 0.9948 3.59 0.54 11.5 6
7.4 0.52 0.13 2.4 0.078 34 61 0.99528 3.43 0.59 10.8 6
7.3 0.305 0.39 1.2 0.059 7 11 0.99331 3.29 0.52 11.5 6
9.3 0.38 0.48 3.8 0.132 3 11 0.99577 3.23 0.57 13.2 6
9.1 0.28 0.46 9 0.114 3 9 0.99901 3.18 0.6 10.9 6
10 0.46 0.44 2.9 0.065 4 8 0.99674 3.33 0.62 12.2 6
9.4 0.395 0.46 4.6 0.094 3 10 0.99639 3.27 0.64 12.2 7
7.3 0.305 0.39 1.2 0.059 7 11 0.99331 3.29 0.52 11.5 6
8.6 0.315 0.4 2.2 0.079 3 6 0.99512 3.27 0.67 11.9 6
5.3 0.715 0.19 1.5 0.161 7 62 0.99395 3.62 0.61 11 5
6.8 0.41 0.31 8.8 0.084 26 45 0.99824 3.38 0.64 10.1 6
8.4 0.36 0.32 2.2 0.081 32 79 0.9964 3.3 0.72 11 6
8.4 0.62 0.12 1.8 0.072 38 46 0.99504 3.38 0.89 11.8 6
9.6 0.41 0.37 2.3 0.091 10 23 0.99786 3.24 0.56 10.5 5
8.4 0.36 0.32 2.2 0.081 32 79 0.9964 3.3 0.72 11 6
8.4 0.62 0.12 1.8 0.072 38 46 0.99504 3.38 0.89 11.8 6
6.8 0.41 0.31 8.8 0.084 26 45 0.99824 3.38 0.64 10.1 6
8.6 0.47 0.27 2.3 0.055 14 28 0.99516 3.18 0.8 11.2 5
8.6 0.22 0.36 1.9 0.064 53 77 0.99604 3.47 0.87 11 7
9.4 0.24 0.33 2.3 0.061 52 73 0.99786 3.47 0.9 10.2 6
8.4 0.67 0.19 2.2 0.093 11 75 0.99736 3.2 0.59 9.2 4
8.6 0.47 0.27 2.3 0.055 14 28 0.99516 3.18 0.8 11.2 5
8.7 0.33 0.38 3.3 0.063 10 19 0.99468 3.3 0.73 12 7
6.6 0.61 0.01 1.9 0.08 8 25 0.99746 3.69 0.73 10.5 5
7.4 0.61 0.01 2 0.074 13 38 0.99748 3.48 0.65 9.8 5
7.6 0.4 0.29 1.9 0.078 29 66 0.9971 3.45 0.59 9.5 6
7.4 0.61 0.01 2 0.074 13 38 0.99748 3.48 0.65 9.8 5
6.6 0.61 0.01 1.9 0.08 8 25 0.99746 3.69 0.73 10.5 5
8.8 0.3 0.38 2.3 0.06 19 72 0.99543 3.39 0.72 11.8 6
8.8 0.3 0.38 2.3 0.06 19 72 0.99543 3.39 0.72 11.8 6
12 0.63 0.5 1.4 0.071 6 26 0.99791 3.07 0.6 10.4 4
7.2 0.38 0.38 2.8 0.068 23 42 0.99356 3.34 0.72 12.9 7
6.2 0.46 0.17 1.6 0.073 7 11 0.99425 3.61 0.54 11.4 5
9.6 0.33 0.52 2.2 0.074 13 25 0.99509 3.36 0.76 12.4 7
9.9 0.27 0.49 5 0.082 9 17 0.99484 3.19 0.52 12.5 7
10.1 0.43 0.4 2.6 0.092 13 52 0.99834 3.22 0.64 10 7
9.8 0.5 0.34 2.3 0.094 10 45 0.99864 3.24 0.6 9.7 7
8.3 0.3 0.49 3.8 0.09 11 24 0.99498 3.27 0.64 12.1 7
10.2 0.44 0.42 2 0.071 7 20 0.99566 3.14 0.79 11.1 7
10.2 0.44 0.58 4.1 0.092 11 24 0.99745 3.29 0.99 12 7
8.3 0.28 0.48 2.1 0.093 6 12 0.99408 3.26 0.62 12.4 7
8.9 0.12 0.45 1.8 0.075 10 21 0.99552 3.41 0.76 11.9 7
8.9 0.12 0.45 1.8 0.075 10 21 0.99552 3.41 0.76 11.9 7
8.9 0.12 0.45 1.8 0.075 10 21 0.99552 3.41 0.76 11.9 7
8.3 0.28 0.48 2.1 0.093 6 12 0.99408 3.26 0.62 12.4 7
8.2 0.31 0.4 2.2 0.058 6 10 0.99536 3.31 0.68 11.2 7
10.2 0.34 0.48 2.1 0.052 5 9 0.99458 3.2 0.69 12.1 7
7.6 0.43 0.4 2.7 0.082 6 11 0.99538 3.44 0.54 12.2 6
8.5 0.21 0.52 1.9 0.09 9 23 0.99648 3.36 0.67 10.4 5
9 0.36 0.52 2.1 0.111 5 10 0.99568 3.31 0.62 11.3 6
9.5 0.37 0.52 2 0.088 12 51 0.99613 3.29 0.58 11.1 6
6.4 0.57 0.12 2.3 0.12 25 36 0.99519 3.47 0.71 11.3 7
8 0.59 0.05 2 0.089 12 32 0.99735 3.36 0.61 10 5
8.5 0.47 0.27 1.9 0.058 18 38 0.99518 3.16 0.85 11.1 6
7.1 0.56 0.14 1.6 0.078 7 18 0.99592 3.27 0.62 9.3 5
6.6 0.57 0.02 2.1 0.115 6 16 0.99654 3.38 0.69 9.5 5
8.8 0.27 0.39 2 0.1 20 27 0.99546 3.15 0.69 11.2 6
8.5 0.47 0.27 1.9 0.058 18 38 0.99518 3.16 0.85 11.1 6
8.3 0.34 0.4 2.4 0.065 24 48 0.99554 3.34 0.86 11 6
9 0.38 0.41 2.4 0.103 6 10 0.99604 3.13 0.58 11.9 7
8.5 0.66 0.2 2.1 0.097 23 113 0.99733 3.13 0.48 9.2 5
9 0.4 0.43 2.4 0.068 29 46 0.9943 3.2 0.6 12.2 6
6.7 0.56 0.09 2.9 0.079 7 22 0.99669 3.46 0.61 10.2 5
10.4 0.26 0.48 1.9 0.066 6 10 0.99724 3.33 0.87 10.9 6
10.4 0.26 0.48 1.9 0.066 6 10 0.99724 3.33 0.87 10.9 6
10.1 0.38 0.5 2.4 0.104 6 13 0.99643 3.22 0.65 11.6 7
8.5 0.34 0.44 1.7 0.079 6 12 0.99605 3.52 0.63 10.7 5
8.8 0.33 0.41 5.9 0.073 7 13 0.99658 3.3 0.62 12.1 7
7.2 0.41 0.3 2.1 0.083 35 72 0.997 3.44 0.52 9.4 5
7.2 0.41 0.3 2.1 0.083 35 72 0.997 3.44 0.52 9.4 5
8.4 0.59 0.29 2.6 0.109 31 119 0.99801 3.15 0.5 9.1 5
7 0.4 0.32 3.6 0.061 9 29 0.99416 3.28 0.49 11.3 7
12.2 0.45 0.49 1.4 0.075 3 6 0.9969 3.13 0.63 10.4 5
9.1 0.5 0.3 1.9 0.065 8 17 0.99774 3.32 0.71 10.5 6
9.5 0.86 0.26 1.9 0.079 13 28 0.99712 3.25 0.62 10 5
7.3 0.52 0.32 2.1 0.07 51 70 0.99418 3.34 0.82 12.9 6
9.1 0.5 0.3 1.9 0.065 8 17 0.99774 3.32 0.71 10.5 6
12.2 0.45 0.49 1.4 0.075 3 6 0.9969 3.13 0.63 10.4 5
7.4 0.58 0 2 0.064 7 11 0.99562 3.45 0.58 11.3 6
9.8 0.34 0.39 1.4 0.066 3 7 0.9947 3.19 0.55 11.4 7
7.1 0.36 0.3 1.6 0.08 35 70 0.99693 3.44 0.5 9.4 5
7.7 0.39 0.12 1.7 0.097 19 27 0.99596 3.16 0.49 9.4 5
9.7 0.295 0.4 1.5 0.073 14 21 0.99556 3.14 0.51 10.9 6
7.7 0.39 0.12 1.7 0.097 19 27 0.99596 3.16 0.49 9.4 5
7.1 0.34 0.28 2 0.082 31 68 0.99694 3.45 0.48 9.4 5
6.5 0.4 0.1 2 0.076 30 47 0.99554 3.36 0.48 9.4 6
7.1 0.34 0.28 2 0.082 31 68 0.99694 3.45 0.48 9.4 5
10 0.35 0.45 2.5 0.092 20 88 0.99918 3.15 0.43 9.4 5
7.7 0.6 0.06 2 0.079 19 41 0.99697 3.39 0.62 10.1 6
5.6 0.66 0 2.2 0.087 3 11 0.99378 3.71 0.63 12.8 7
5.6 0.66 0 2.2 0.087 3 11 0.99378 3.71 0.63 12.8 7
8.9 0.84 0.34 1.4 0.05 4 10 0.99554 3.12 0.48 9.1 6
6.4 0.69 0 1.65 0.055 7 12 0.99162 3.47 0.53 12.9 6
7.5 0.43 0.3 2.2 0.062 6 12 0.99495 3.44 0.72 11.5 7
9.9 0.35 0.38 1.5 0.058 31 47 0.99676 3.26 0.82 10.6 7
9.1 0.29 0.33 2.05 0.063 13 27 0.99516 3.26 0.84 11.7 7
6.8 0.36 0.32 1.8 0.067 4 8 0.9928 3.36 0.55 12.8 7
8.2 0.43 0.29 1.6 0.081 27 45 0.99603 3.25 0.54 10.3 5
6.8 0.36 0.32 1.8 0.067 4 8 0.9928 3.36 0.55 12.8 7
9.1 0.29 0.33 2.05 0.063 13 27 0.99516 3.26 0.84 11.7 7
9.1 0.3 0.34 2 0.064 12 25 0.99516 3.26 0.84 11.7 7
8.9 0.35 0.4 3.6 0.11 12 24 0.99549 3.23 0.7 12 7
9.6 0.5 0.36 2.8 0.116 26 55 0.99722 3.18 0.68 10.9 5
8.9 0.28 0.45 1.7 0.067 7 12 0.99354 3.25 0.55 12.3 7
8.9 0.32 0.31 2 0.088 12 19 0.9957 3.17 0.55 10.4 6
7.7 1.005 0.15 2.1 0.102 11 32 0.99604 3.23 0.48 10 5
7.5 0.71 0 1.6 0.092 22 31 0.99635 3.38 0.58 10 6
8 0.58 0.16 2 0.12 3 7 0.99454 3.22 0.58 11.2 6
10.5 0.39 0.46 2.2 0.075 14 27 0.99598 3.06 0.84 11.4 6
8.9 0.38 0.4 2.2 0.068 12 28 0.99486 3.27 0.75 12.6 7
8 0.18 0.37 0.9 0.049 36 109 0.99007 2.89 0.44 12.7 6
8 0.18 0.37 0.9 0.049 36 109 0.99007 2.89 0.44 12.7 6
7 0.5 0.14 1.8 0.078 10 23 0.99636 3.53 0.61 10.4 5
11.3 0.36 0.66 2.4 0.123 3 8 0.99642 3.2 0.53 11.9 6
11.3 0.36 0.66 2.4 0.123 3 8 0.99642 3.2 0.53 11.9 6
7 0.51 0.09 2.1 0.062 4 9 0.99584 3.35 0.54 10.5 5
8.2 0.32 0.42 2.3 0.098 3 9 0.99506 3.27 0.55 12.3 6
7.7 0.58 0.01 1.8 0.088 12 18 0.99568 3.32 0.56 10.5 7
8.6 0.83 0 2.8 0.095 17 43 0.99822 3.33 0.6 10.4 6
7.9 0.31 0.32 1.9 0.066 14 36 0.99364 3.41 0.56 12.6 6
6.4 0.795 0 2.2 0.065 28 52 0.99378 3.49 0.52 11.6 5
7.2 0.34 0.21 2.5 0.075 41 68 0.99586 3.37 0.54 10.1 6
7.7 0.58 0.01 1.8 0.088 12 18 0.99568 3.32 0.56 10.5 7
7.1 0.59 0 2.1 0.091 9 14 0.99488 3.42 0.55 11.5 7
7.3 0.55 0.01 1.8 0.093 9 15 0.99514 3.35 0.58 11 7
8.1 0.82 0 4.1 0.095 5 14 0.99854 3.36 0.53 9.6 5
7.5 0.57 0.08 2.6 0.089 14 27 0.99592 3.3 0.59 10.4 6
8.9 0.745 0.18 2.5 0.077 15 48 0.99739 3.2 0.47 9.7 6
10.1 0.37 0.34 2.4 0.085 5 17 0.99683 3.17 0.65 10.6 7
7.6 0.31 0.34 2.5 0.082 26 35 0.99356 3.22 0.59 12.5 7
7.3 0.91 0.1 1.8 0.074 20 56 0.99672 3.35 0.56 9.2 5
8.7 0.41 0.41 6.2 0.078 25 42 0.9953 3.24 0.77 12.6 7
8.9 0.5 0.21 2.2 0.088 21 39 0.99692 3.33 0.83 11.1 6
7.4 0.965 0 2.2 0.088 16 32 0.99756 3.58 0.67 10.2 5
6.9 0.49 0.19 1.7 0.079 13 26 0.99547 3.38 0.64 9.8 6
8.9 0.5 0.21 2.2 0.088 21 39 0.99692 3.33 0.83 11.1 6
9.5 0.39 0.41 8.9 0.069 18 39 0.99859 3.29 0.81 10.9 7
6.4 0.39 0.33 3.3 0.046 12 53 0.99294 3.36 0.62 12.2 6
6.9 0.44 0 1.4 0.07 32 38 0.99438 3.32 0.58 11.4 6
7.6 0.78 0 1.7 0.076 33 45 0.99612 3.31 0.62 10.7 6
7.1 0.43 0.17 1.8 0.082 27 51 0.99634 3.49 0.64 10.4 5
9.3 0.49 0.36 1.7 0.081 3 14 0.99702 3.27 0.78 10.9 6
9.3 0.5 0.36 1.8 0.084 6 17 0.99704 3.27 0.77 10.8 6
7.1 0.43 0.17 1.8 0.082 27 51 0.99634 3.49 0.64 10.4 5
8.5 0.46 0.59 1.4 0.414 16 45 0.99702 3.03 1.34 9.2 5
5.6 0.605 0.05 2.4 0.073 19 25 0.99258 3.56 0.55 12.9 5
8.3 0.33 0.42 2.3 0.07 9 20 0.99426 3.38 0.77 12.7 7
8.2 0.64 0.27 2 0.095 5 77 0.99747 3.13 0.62 9.1 6
8.2 0.64 0.27 2 0.095 5 77 0.99747 3.13 0.62 9.1 6
8.9 0.48 0.53 4 0.101 3 10 0.99586 3.21 0.59 12.1 7
7.6 0.42 0.25 3.9 0.104 28 90 0.99784 3.15 0.57 9.1 5
9.9 0.53 0.57 2.4 0.093 30 52 0.9971 3.19 0.76 11.6 7
8.9 0.48 0.53 4 0.101 3 10 0.99586 3.21 0.59 12.1 7
11.6 0.23 0.57 1.8 0.074 3 8 0.9981 3.14 0.7 9.9 6
9.1 0.4 0.5 1.8 0.071 7 16 0.99462 3.21 0.69 12.5 8
8 0.38 0.44 1.9 0.098 6 15 0.9956 3.3 0.64 11.4 6
10.2 0.29 0.65 2.4 0.075 6 17 0.99565 3.22 0.63 11.8 6
8.2 0.74 0.09 2 0.067 5 10 0.99418 3.28 0.57 11.8 6
7.7 0.61 0.18 2.4 0.083 6 20 0.9963 3.29 0.6 10.2 6
6.6 0.52 0.08 2.4 0.07 13 26 0.99358 3.4 0.72 12.5 7
11.1 0.31 0.53 2.2 0.06 3 10 0.99572 3.02 0.83 10.9 7
11.1 0.31 0.53 2.2 0.06 3 10 0.99572 3.02 0.83 10.9 7
8 0.62 0.35 2.8 0.086 28 52 0.997 3.31 0.62 10.8 5
9.3 0.33 0.45 1.5 0.057 19 37 0.99498 3.18 0.89 11.1 7
7.5 0.77 0.2 8.1 0.098 30 92 0.99892 3.2 0.58 9.2 5
7.2 0.35 0.26 1.8 0.083 33 75 0.9968 3.4 0.58 9.5 6
8 0.62 0.33 2.7 0.088 16 37 0.9972 3.31 0.58 10.7 6
7.5 0.77 0.2 8.1 0.098 30 92 0.99892 3.2 0.58 9.2 5
9.1 0.25 0.34 2 0.071 45 67 0.99769 3.44 0.86 10.2 7
9.9 0.32 0.56 2 0.073 3 8 0.99534 3.15 0.73 11.4 6
8.6 0.37 0.65 6.4 0.08 3 8 0.99817 3.27 0.58 11 5
8.6 0.37 0.65 6.4 0.08 3 8 0.99817 3.27 0.58 11 5
7.9 0.3 0.68 8.3 0.05 37.5 278 0.99316 3.01 0.51 12.3 7
10.3 0.27 0.56 1.4 0.047 3 8 0.99471 3.16 0.51 11.8 6
7.9 0.3 0.68 8.3 0.05 37.5 289 0.99316 3.01 0.51 12.3 7
7.2 0.38 0.3 1.8 0.073 31 70 0.99685 3.42 0.59 9.5 6
8.7 0.42 0.45 2.4 0.072 32 59 0.99617 3.33 0.77 12 6
7.2 0.38 0.3 1.8 0.073 31 70 0.99685 3.42 0.59 9.5 6
6.8 0.48 0.08 1.8 0.074 40 64 0.99529 3.12 0.49 9.6 5
8.5 0.34 0.4 4.7 0.055 3 9 0.99738 3.38 0.66 11.6 7
7.9 0.19 0.42 1.6 0.057 18 30 0.994 3.29 0.69 11.2 6
11.6 0.41 0.54 1.5 0.095 22 41 0.99735 3.02 0.76 9.9 7
11.6 0.41 0.54 1.5 0.095 22 41 0.99735 3.02 0.76 9.9 7
10 0.26 0.54 1.9 0.083 42 74 0.99451 2.98 0.63 11.8 8
7.9 0.34 0.42 2 0.086 8 19 0.99546 3.35 0.6 11.4 6
7 0.54 0.09 2 0.081 10 16 0.99479 3.43 0.59 11.5 6
9.2 0.31 0.36 2.2 0.079 11 31 0.99615 3.33 0.86 12 7
6.6 0.725 0.09 5.5 0.117 9 17 0.99655 3.35 0.49 10.8 6
9.4 0.4 0.47 2.5 0.087 6 20 0.99772 3.15 0.5 10.5 5
6.6 0.725 0.09 5.5 0.117 9 17 0.99655 3.35 0.49 10.8 6
8.6 0.52 0.38 1.5 0.096 5 18 0.99666 3.2 0.52 9.4 5
8 0.31 0.45 2.1 0.216 5 16 0.99358 3.15 0.81 12.5 7
8.6 0.52 0.38 1.5 0.096 5 18 0.99666 3.2 0.52 9.4 5
8.4 0.34 0.42 2.1 0.072 23 36 0.99392 3.11 0.78 12.4 6
7.4 0.49 0.27 2.1 0.071 14 25 0.99388 3.35 0.63 12 6
6.1 0.48 0.09 1.7 0.078 18 30 0.99402 3.45 0.54 11.2 6
7.4 0.49 0.27 2.1 0.071 14 25 0.99388 3.35 0.63 12 6
8 0.48 0.34 2.2 0.073 16 25 0.9936 3.28 0.66 12.4 6
6.3 0.57 0.28 2.1 0.048 13 49 0.99374 3.41 0.6 12.8 5
8.2 0.23 0.42 1.9 0.069 9 17 0.99376 3.21 0.54 12.3 6
9.1 0.3 0.41 2 0.068 10 24 0.99523 3.27 0.85 11.7 7
8.1 0.78 0.1 3.3 0.09 4 13 0.99855 3.36 0.49 9.5 5
10.8 0.47 0.43 2.1 0.171 27 66 0.9982 3.17 0.76 10.8 6
8.3 0.53 0 1.4 0.07 6 14 0.99593 3.25 0.64 10 6
5.4 0.42 0.27 2 0.092 23 55 0.99471 3.78 0.64 12.3 7
7.9 0.33 0.41 1.5 0.056 6 35 0.99396 3.29 0.71 11 6
8.9 0.24 0.39 1.6 0.074 3 10 0.99698 3.12 0.59 9.5 6
5 0.4 0.5 4.3 0.046 29 80 0.9902 3.49 0.66 13.6 6
7 0.69 0.07 2.5 0.091 15 21 0.99572 3.38 0.6 11.3 6
7 0.69 0.07 2.5 0.091 15 21 0.99572 3.38 0.6 11.3 6
7 0.69 0.07 2.5 0.091 15 21 0.99572 3.38 0.6 11.3 6
7.1 0.39 0.12 2.1 0.065 14 24 0.99252 3.3 0.53 13.3 6
5.6 0.66 0 2.5 0.066 7 15 0.99256 3.52 0.58 12.9 5
7.9 0.54 0.34 2.5 0.076 8 17 0.99235 3.2 0.72 13.1 8
6.6 0.5 0 1.8 0.062 21 28 0.99352 3.44 0.55 12.3 6
6.3 0.47 0 1.4 0.055 27 33 0.9922 3.45 0.48 12.3 6
10.7 0.4 0.37 1.9 0.081 17 29 0.99674 3.12 0.65 11.2 6
6.5 0.58 0 2.2 0.096 3 13 0.99557 3.62 0.62 11.5 4
8.8 0.24 0.35 1.7 0.055 13 27 0.99394 3.14 0.59 11.3 7
5.8 0.29 0.26 1.7 0.063 3 11 0.9915 3.39 0.54 13.5 6
6.3 0.76 0 2.9 0.072 26 52 0.99379 3.51 0.6 11.5 6
10 0.43 0.33 2.7 0.095 28 89 0.9984 3.22 0.68 10 5
10.5 0.43 0.35 3.3 0.092 24 70 0.99798 3.21 0.69 10.5 6
9.1 0.6 0 1.9 0.058 5 10 0.9977 3.18 0.63 10.4 6
5.9 0.19 0.21 1.7 0.045 57 135 0.99341 3.32 0.44 9.5 5
7.4 0.36 0.34 1.8 0.075 18 38 0.9933 3.38 0.88 13.6 7
7.2 0.48 0.07 5.5 0.089 10 18 0.99684 3.37 0.68 11.2 7
8.5 0.28 0.35 1.7 0.061 6 15 0.99524 3.3 0.74 11.8 7
8 0.25 0.43 1.7 0.067 22 50 0.9946 3.38 0.6 11.9 6
10.4 0.52 0.45 2 0.08 6 13 0.99774 3.22 0.76 11.4 6
10.4 0.52 0.45 2 0.08 6 13 0.99774 3.22 0.76 11.4 6
7.5 0.41 0.15 3.7 0.104 29 94 0.99786 3.14 0.58 9.1 5
8.2 0.51 0.24 2 0.079 16 86 0.99764 3.34 0.64 9.5 6
7.3 0.4 0.3 1.7 0.08 33 79 0.9969 3.41 0.65 9.5 6
8.2 0.38 0.32 2.5 0.08 24 71 0.99624 3.27 0.85 11 6
6.9 0.45 0.11 2.4 0.043 6 12 0.99354 3.3 0.65 11.4 6
7 0.22 0.3 1.8 0.065 16 20 0.99672 3.61 0.82 10 6
7.3 0.32 0.23 2.3 0.066 35 70 0.99588 3.43 0.62 10.1 5
8.2 0.2 0.43 2.5 0.076 31 51 0.99672 3.53 0.81 10.4 6
7.8 0.5 0.12 1.8 0.178 6 21 0.996 3.28 0.87 9.8 6
10 0.41 0.45 6.2 0.071 6 14 0.99702 3.21 0.49 11.8 7
7.8 0.39 0.42 2 0.086 9 21 0.99526 3.39 0.66 11.6 6
10 0.35 0.47 2 0.061 6 11 0.99585 3.23 0.52 12 6
8.2 0.33 0.32 2.8 0.067 4 12 0.99473 3.3 0.76 12.8 7
6.1 0.58 0.23 2.5 0.044 16 70 0.99352 3.46 0.65 12.5 6
8.3 0.6 0.25 2.2 0.118 9 38 0.99616 3.15 0.53 9.8 5
9.6 0.42 0.35 2.1 0.083 17 38 0.99622 3.23 0.66 11.1 6
6.6 0.58 0 2.2 0.1 50 63 0.99544 3.59 0.68 11.4 6
8.3 0.6 0.25 2.2 0.118 9 38 0.99616 3.15 0.53 9.8 5
8.5 0.18 0.51 1.75 0.071 45 88 0.99524 3.33 0.76 11.8 7
5.1 0.51 0.18 2.1 0.042 16 101 0.9924 3.46 0.87 12.9 7
6.7 0.41 0.43 2.8 0.076 22 54 0.99572 3.42 1.16 10.6 6
10.2 0.41 0.43 2.2 0.11 11 37 0.99728 3.16 0.67 10.8 5
10.6 0.36 0.57 2.3 0.087 6 20 0.99676 3.14 0.72 11.1 7
8.8 0.45 0.43 1.4 0.076 12 21 0.99551 3.21 0.75 10.2 6
8.5 0.32 0.42 2.3 0.075 12 19 0.99434 3.14 0.71 11.8 7
9 0.785 0.24 1.7 0.078 10 21 0.99692 3.29 0.67 10 5
9 0.785 0.24 1.7 0.078 10 21 0.99692 3.29 0.67 10 5
8.5 0.44 0.5 1.9 0.369 15 38 0.99634 3.01 1.1 9.4 5
9.9 0.54 0.26 2 0.111 7 60 0.99709 2.94 0.98 10.2 5
8.2 0.33 0.39 2.5 0.074 29 48 0.99528 3.32 0.88 12.4 7
6.5 0.34 0.27 2.8 0.067 8 44 0.99384 3.21 0.56 12 6
7.6 0.5 0.29 2.3 0.086 5 14 0.99502 3.32 0.62 11.5 6
9.2 0.36 0.34 1.6 0.062 5 12 0.99667 3.2 0.67 10.5 6
7.1 0.59 0 2.2 0.078 26 44 0.99522 3.42 0.68 10.8 6
9.7 0.42 0.46 2.1 0.074 5 16 0.99649 3.27 0.74 12.3 6
7.6 0.36 0.31 1.7 0.079 26 65 0.99716 3.46 0.62 9.5 6
7.6 0.36 0.31 1.7 0.079 26 65 0.99716 3.46 0.62 9.5 6
6.5 0.61 0 2.2 0.095 48 59 0.99541 3.61 0.7 11.5 6
6.5 0.88 0.03 5.6 0.079 23 47 0.99572 3.58 0.5 11.2 4
7.1 0.66 0 2.4 0.052 6 11 0.99318 3.35 0.66 12.7 7
5.6 0.915 0 2.1 0.041 17 78 0.99346 3.68 0.73 11.4 5
8.2 0.35 0.33 2.4 0.076 11 47 0.99599 3.27 0.81 11 6
8.2 0.35 0.33 2.4 0.076 11 47 0.99599 3.27 0.81 11 6
9.8 0.39 0.43 1.65 0.068 5 11 0.99478 3.19 0.46 11.4 5
10.2 0.4 0.4 2.5 0.068 41 54 0.99754 3.38 0.86 10.5 6
6.8 0.66 0.07 1.6 0.07 16 61 0.99572 3.29 0.6 9.3 5
6.7 0.64 0.23 2.1 0.08 11 119 0.99538 3.36 0.7 10.9 5
7 0.43 0.3 2 0.085 6 39 0.99346 3.33 0.46 11.9 6
6.6 0.8 0.03 7.8 0.079 6 12 0.9963 3.52 0.5 12.2 5
7 0.43 0.3 2 0.085 6 39 0.99346 3.33 0.46 11.9 6
6.7 0.64 0.23 2.1 0.08 11 119 0.99538 3.36 0.7 10.9 5
8.8 0.955 0.05 1.8 0.075 5 19 0.99616 3.3 0.44 9.6 4
9.1 0.4 0.57 4.6 0.08 6 20 0.99652 3.28 0.57 12.5 6
6.5 0.885 0 2.3 0.166 6 12 0.99551 3.56 0.51 10.8 5
7.2 0.25 0.37 2.5 0.063 11 41 0.99439 3.52 0.8 12.4 7
6.4 0.885 0 2.3 0.166 6 12 0.99551 3.56 0.51 10.8 5
7 0.745 0.12 1.8 0.114 15 64 0.99588 3.22 0.59 9.5 6
6.2 0.43 0.22 1.8 0.078 21 56 0.99633 3.52 0.6 9.5 6
7.9 0.58 0.23 2.3 0.076 23 94 0.99686 3.21 0.58 9.5 6
7.7 0.57 0.21 1.5 0.069 4 9 0.99458 3.16 0.54 9.8 6
7.7 0.26 0.26 2 0.052 19 77 0.9951 3.15 0.79 10.9 6
7.9 0.58 0.23 2.3 0.076 23 94 0.99686 3.21 0.58 9.5 6
7.7 0.57 0.21 1.5 0.069 4 9 0.99458 3.16 0.54 9.8 6
7.9 0.34 0.36 1.9 0.065 5 10 0.99419 3.27 0.54 11.2 7
8.6 0.42 0.39 1.8 0.068 6 12 0.99516 3.35 0.69 11.7 8
9.9 0.74 0.19 5.8 0.111 33 76 0.99878 3.14 0.55 9.4 5
7.2 0.36 0.46 2.1 0.074 24 44 0.99534 3.4 0.85 11 7
7.2 0.36 0.46 2.1 0.074 24 44 0.99534 3.4 0.85 11 7
7.2 0.36 0.46 2.1 0.074 24 44 0.99534 3.4 0.85 11 7
9.9 0.72 0.55 1.7 0.136 24 52 0.99752 3.35 0.94 10 5
7.2 0.36 0.46 2.1 0.074 24 44 0.99534 3.4 0.85 11 7
6.2 0.39 0.43 2 0.071 14 24 0.99428 3.45 0.87 11.2 7
6.8 0.65 0.02 2.1 0.078 8 15 0.99498 3.35 0.62 10.4 6
6.6 0.44 0.15 2.1 0.076 22 53 0.9957 3.32 0.62 9.3 5
6.8 0.65 0.02 2.1 0.078 8 15 0.99498 3.35 0.62 10.4 6
9.6 0.38 0.42 1.9 0.071 5 13 0.99659 3.15 0.75 10.5 6
10.2 0.33 0.46 1.9 0.081 6 9 0.99628 3.1 0.48 10.4 6
8.8 0.27 0.46 2.1 0.095 20 29 0.99488 3.26 0.56 11.3 6
7.9 0.57 0.31 2 0.079 10 79 0.99677 3.29 0.69 9.5 6
8.2 0.34 0.37 1.9 0.057 43 74 0.99408 3.23 0.81 12 6
8.2 0.4 0.31 1.9 0.082 8 24 0.996 3.24 0.69 10.6 6
9 0.39 0.4 1.3 0.044 25 50 0.99478 3.2 0.83 10.9 6
10.9 0.32 0.52 1.8 0.132 17 44 0.99734 3.28 0.77 11.5 6
10.9 0.32 0.52 1.8 0.132 17 44 0.99734 3.28 0.77 11.5 6
8.1 0.53 0.22 2.2 0.078 33 89 0.99678 3.26 0.46 9.6 6
10.5 0.36 0.47 2.2 0.074 9 23 0.99638 3.23 0.76 12 6
12.6 0.39 0.49 2.5 0.08 8 20 0.9992 3.07 0.82 10.3 6
9.2 0.46 0.23 2.6 0.091 18 77 0.99922 3.15 0.51 9.4 5
7.5 0.58 0.03 4.1 0.08 27 46 0.99592 3.02 0.47 9.2 5
9 0.58 0.25 2 0.104 8 21 0.99769 3.27 0.72 9.6 5
5.1 0.42 0 1.8 0.044 18 88 0.99157 3.68 0.73 13.6 7
7.6 0.43 0.29 2.1 0.075 19 66 0.99718 3.4 0.64 9.5 5
7.7 0.18 0.34 2.7 0.066 15 58 0.9947 3.37 0.78 11.8 6
7.8 0.815 0.01 2.6 0.074 48 90 0.99621 3.38 0.62 10.8 5
7.6 0.43 0.29 2.1 0.075 19 66 0.99718 3.4 0.64 9.5 5
10.2 0.23 0.37 2.2 0.057 14 36 0.99614 3.23 0.49 9.3 4
7.1 0.75 0.01 2.2 0.059 11 18 0.99242 3.39 0.4 12.8 6
6 0.33 0.32 12.9 0.054 6 113 0.99572 3.3 0.56 11.5 4
7.8 0.55 0 1.7 0.07 7 17 0.99659 3.26 0.64 9.4 6
7.1 0.75 0.01 2.2 0.059 11 18 0.99242 3.39 0.4 12.8 6
8.1 0.73 0 2.5 0.081 12 24 0.99798 3.38 0.46 9.6 4
6.5 0.67 0 4.3 0.057 11 20 0.99488 3.45 0.56 11.8 4
7.5 0.61 0.2 1.7 0.076 36 60 0.99494 3.1 0.4 9.3 5
9.8 0.37 0.39 2.5 0.079 28 65 0.99729 3.16 0.59 9.8 5
9 0.4 0.41 2 0.058 15 40 0.99414 3.22 0.6 12.2 6
8.3 0.56 0.22 2.4 0.082 10 86 0.9983 3.37 0.62 9.5 5
5.9 0.29 0.25 13.4 0.067 72 160 0.99721 3.33 0.54 10.3 6
7.4 0.55 0.19 1.8 0.082 15 34 0.99655 3.49 0.68 10.5 5
7.4 0.74 0.07 1.7 0.086 15 48 0.99502 3.12 0.48 10 5
7.4 0.55 0.19 1.8 0.082 15 34 0.99655 3.49 0.68 10.5 5
6.9 0.41 0.33 2.2 0.081 22 36 0.9949 3.41 0.75 11.1 6
7.1 0.6 0.01 2.3 0.079 24 37 0.99514 3.4 0.61 10.9 6
7.1 0.6 0.01 2.3 0.079 24 37 0.99514 3.4 0.61 10.9 6
7.5 0.58 0.14 2.2 0.077 27 60 0.9963 3.28 0.59 9.8 5
7.1 0.72 0 1.8 0.123 6 14 0.99627 3.45 0.58 9.8 5
7.9 0.66 0 1.4 0.096 6 13 0.99569 3.43 0.58 9.5 5
7.8 0.7 0.06 1.9 0.079 20 35 0.99628 3.4 0.69 10.9 5
6.1 0.64 0.02 2.4 0.069 26 46 0.99358 3.47 0.45 11 5
7.5 0.59 0.22 1.8 0.082 43 60 0.99499 3.1 0.42 9.2 5
7 0.58 0.28 4.8 0.085 12 69 0.99633 3.32 0.7 11 6
6.8 0.64 0 2.7 0.123 15 33 0.99538 3.44 0.63 11.3 6
6.8 0.64 0 2.7 0.123 15 33 0.99538 3.44 0.63 11.3 6
8.6 0.635 0.68 1.8 0.403 19 56 0.99632 3.02 1.15 9.3 5
6.3 1.02 0 2 0.083 17 24 0.99437 3.59 0.55 11.2 4
9.8 0.45 0.38 2.5 0.081 34 66 0.99726 3.15 0.58 9.8 5
8.2 0.78 0 2.2 0.089 13 26 0.9978 3.37 0.46 9.6 4
8.5 0.37 0.32 1.8 0.066 26 51 0.99456 3.38 0.72 11.8 6
7.2 0.57 0.05 2.3 0.081 16 36 0.99564 3.38 0.6 10.3 6
7.2 0.57 0.05 2.3 0.081 16 36 0.99564 3.38 0.6 10.3 6
10.4 0.43 0.5 2.3 0.068 13 19 0.996 3.1 0.87 11.4 6
6.9 0.41 0.31 2 0.079 21 51 0.99668 3.47 0.55 9.5 6
5.5 0.49 0.03 1.8 0.044 28 87 0.9908 3.5 0.82 14 8
5 0.38 0.01 1.6 0.048 26 60 0.99084 3.7 0.75 14 6
7.3 0.44 0.2 1.6 0.049 24 64 0.9935 3.38 0.57 11.7 6
5.9 0.46 0 1.9 0.077 25 44 0.99385 3.5 0.53 11.2 5
7.5 0.58 0.2 2 0.073 34 44 0.99494 3.1 0.43 9.3 5
7.8 0.58 0.13 2.1 0.102 17 36 0.9944 3.24 0.53 11.2 6
8 0.715 0.22 2.3 0.075 13 81 0.99688 3.24 0.54 9.5 6
8.5 0.4 0.4 6.3 0.05 3 10 0.99566 3.28 0.56 12 4
7 0.69 0 1.9 0.114 3 10 0.99636 3.35 0.6 9.7 6
8 0.715 0.22 2.3 0.075 13 81 0.99688 3.24 0.54 9.5 6
9.8 0.3 0.39 1.7 0.062 3 9 0.9948 3.14 0.57 11.5 7
7.1 0.46 0.2 1.9 0.077 28 54 0.9956 3.37 0.64 10.4 6
7.1 0.46 0.2 1.9 0.077 28 54 0.9956 3.37 0.64 10.4 6
7.9 0.765 0 2 0.084 9 22 0.99619 3.33 0.68 10.9 6
8.7 0.63 0.28 2.7 0.096 17 69 0.99734 3.26 0.63 10.2 6
7 0.42 0.19 2.3 0.071 18 36 0.99476 3.39 0.56 10.9 5
11.3 0.37 0.5 1.8 0.09 20 47 0.99734 3.15 0.57 10.5 5
7.1 0.16 0.44 2.5 0.068 17 31 0.99328 3.35 0.54 12.4 6
8 0.6 0.08 2.6 0.056 3 7 0.99286 3.22 0.37 13 5
7 0.6 0.3 4.5 0.068 20 110 0.99914 3.3 1.17 10.2 5
7 0.6 0.3 4.5 0.068 20 110 0.99914 3.3 1.17 10.2 5
7.6 0.74 0 1.9 0.1 6 12 0.99521 3.36 0.59 11 5
8.2 0.635 0.1 2.1 0.073 25 60 0.99638 3.29 0.75 10.9 6
5.9 0.395 0.13 2.4 0.056 14 28 0.99362 3.62 0.67 12.4 6
7.5 0.755 0 1.9 0.084 6 12 0.99672 3.34 0.49 9.7 4
8.2 0.635 0.1 2.1 0.073 25 60 0.99638 3.29 0.75 10.9 6
6.6 0.63 0 4.3 0.093 51 77.5 0.99558 3.2 0.45 9.5 5
6.6 0.63 0 4.3 0.093 51 77.5 0.99558 3.2 0.45 9.5 5
7.2 0.53 0.14 2.1 0.064 15 29 0.99323 3.35 0.61 12.1 6
5.7 0.6 0 1.4 0.063 11 18 0.99191 3.45 0.56 12.2 6
7.6 1.58 0 2.1 0.137 5 9 0.99476 3.5 0.4 10.9 3
5.2 0.645 0 2.15 0.08 15 28 0.99444 3.78 0.61 12.5 6
6.7 0.86 0.07 2 0.1 20 57 0.99598 3.6 0.74 11.7 6
9.1 0.37 0.32 2.1 0.064 4 15 0.99576 3.3 0.8 11.2 6
8 0.28 0.44 1.8 0.081 28 68 0.99501 3.36 0.66 11.2 5
7.6 0.79 0.21 2.3 0.087 21 68 0.9955 3.12 0.44 9.2 5
7.5 0.61 0.26 1.9 0.073 24 88 0.99612 3.3 0.53 9.8 5
9.7 0.69 0.32 2.5 0.088 22 91 0.9979 3.29 0.62 10.1 5
6.8 0.68 0.09 3.9 0.068 15 29 0.99524 3.41 0.52 11.1 4
9.7 0.69 0.32 2.5 0.088 22 91 0.9979 3.29 0.62 10.1 5
7 0.62 0.1 1.4 0.071 27 63 0.996 3.28 0.61 9.2 5
7.5 0.61 0.26 1.9 0.073 24 88 0.99612 3.3 0.53 9.8 5
6.5 0.51 0.15 3 0.064 12 27 0.9929 3.33 0.59 12.8 6
8 1.18 0.21 1.9 0.083 14 41 0.99532 3.34 0.47 10.5 5
7 0.36 0.21 2.3 0.086 20 65 0.99558 3.4 0.54 10.1 6
7 0.36 0.21 2.4 0.086 24 69 0.99556 3.4 0.53 10.1 6
7.5 0.63 0.27 2 0.083 17 91 0.99616 3.26 0.58 9.8 6
5.4 0.74 0 1.2 0.041 16 46 0.99258 4.01 0.59 12.5 6
9.9 0.44 0.46 2.2 0.091 10 41 0.99638 3.18 0.69 11.9 6
7.5 0.63 0.27 2 0.083 17 91 0.99616 3.26 0.58 9.8 6
9.1 0.76 0.68 1.7 0.414 18 64 0.99652 2.9 1.33 9.1 6
9.7 0.66 0.34 2.6 0.094 12 88 0.99796 3.26 0.66 10.1 5
5 0.74 0 1.2 0.041 16 46 0.99258 4.01 0.59 12.5 6
9.1 0.34 0.42 1.8 0.058 9 18 0.99392 3.18 0.55 11.4 5
9.1 0.36 0.39 1.8 0.06 21 55 0.99495 3.18 0.82 11 7
6.7 0.46 0.24 1.7 0.077 18 34 0.9948 3.39 0.6 10.6 6
6.7 0.46 0.24 1.7 0.077 18 34 0.9948 3.39 0.6 10.6 6
6.7 0.46 0.24 1.7 0.077 18 34 0.9948 3.39 0.6 10.6 6
6.7 0.46 0.24 1.7 0.077 18 34 0.9948 3.39 0.6 10.6 6
6.5 0.52 0.11 1.8 0.073 13 38 0.9955 3.34 0.52 9.3 5
7.4 0.6 0.26 2.1 0.083 17 91 0.99616 3.29 0.56 9.8 6
7.4 0.6 0.26 2.1 0.083 17 91 0.99616 3.29 0.56 9.8 6
7.8 0.87 0.26 3.8 0.107 31 67 0.99668 3.26 0.46 9.2 5
8.4 0.39 0.1 1.7 0.075 6 25 0.99581 3.09 0.43 9.7 6
9.1 0.775 0.22 2.2 0.079 12 48 0.9976 3.18 0.51 9.6 5
7.2 0.835 0 2 0.166 4 11 0.99608 3.39 0.52 10 5
6.6 0.58 0.02 2.4 0.069 19 40 0.99387 3.38 0.66 12.6 6
6 0.5 0 1.4 0.057 15 26 0.99448 3.36 0.45 9.5 5
6 0.5 0 1.4 0.057 15 26 0.99448 3.36 0.45 9.5 5
6 0.5 0 1.4 0.057 15 26 0.99448 3.36 0.45 9.5 5
7.5 0.51 0.02 1.7 0.084 13 31 0.99538 3.36 0.54 10.5 6
7.5 0.51 0.02 1.7 0.084 13 31 0.99538 3.36 0.54 10.5 6
7.5 0.51 0.02 1.7 0.084 13 31 0.99538 3.36 0.54 10.5 6
7.6 0.54 0.02 1.7 0.085 17 31 0.99589 3.37 0.51 10.4 6
7.5 0.51 0.02 1.7 0.084 13 31 0.99538 3.36 0.54 10.5 6
11.5 0.42 0.48 2.6 0.077 8 20 0.99852 3.09 0.53 11 5
8.2 0.44 0.24 2.3 0.063 10 28 0.99613 3.25 0.53 10.2 6
6.1 0.59 0.01 2.1 0.056 5 13 0.99472 3.52 0.56 11.4 5
7.2 0.655 0.03 1.8 0.078 7 12 0.99587 3.34 0.39 9.5 5
7.2 0.655 0.03 1.8 0.078 7 12 0.99587 3.34 0.39 9.5 5
6.9 0.57 0 2.8 0.081 21 41 0.99518 3.41 0.52 10.8 5
9 0.6 0.29 2 0.069 32 73 0.99654 3.34 0.57 10 5
7.2 0.62 0.01 2.3 0.065 8 46 0.99332 3.32 0.51 11.8 6
7.6 0.645 0.03 1.9 0.086 14 57 0.9969 3.37 0.46 10.3 5
7.6 0.645 0.03 1.9 0.086 14 57 0.9969 3.37 0.46 10.3 5
7.2 0.58 0.03 2.3 0.077 7 28 0.99568 3.35 0.52 10 5
6.1 0.32 0.25 1.8 0.086 5 32 0.99464 3.36 0.44 10.1 5
6.1 0.34 0.25 1.8 0.084 4 28 0.99464 3.36 0.44 10.1 5
7.3 0.43 0.24 2.5 0.078 27 67 0.99648 3.6 0.59 11.1 6
7.4 0.64 0.17 5.4 0.168 52 98 0.99736 3.28 0.5 9.5 5
11.6 0.475 0.4 1.4 0.091 6 28 0.99704 3.07 0.65 10.0333333333333 6
9.2 0.54 0.31 2.3 0.112 11 38 0.99699 3.24 0.56 10.9 5
8.3 0.85 0.14 2.5 0.093 13 54 0.99724 3.36 0.54 10.1 5
11.6 0.475 0.4 1.4 0.091 6 28 0.99704 3.07 0.65 10.0333333333333 6
8 0.83 0.27 2 0.08 11 63 0.99652 3.29 0.48 9.8 4
7.2 0.605 0.02 1.9 0.096 10 31 0.995 3.46 0.53 11.8 6
7.8 0.5 0.09 2.2 0.115 10 42 0.9971 3.18 0.62 9.5 5
7.3 0.74 0.08 1.7 0.094 10 45 0.99576 3.24 0.5 9.8 5
6.9 0.54 0.3 2.2 0.088 9 105 0.99725 3.25 1.18 10.5 6
8 0.77 0.32 2.1 0.079 16 74 0.99656 3.27 0.5 9.8 6
6.6 0.61 0 1.6 0.069 4 8 0.99396 3.33 0.37 10.4 4
8.7 0.78 0.51 1.7 0.415 12 66 0.99623 3 1.17 9.2 5
7.5 0.58 0.56 3.1 0.153 5 14 0.99476 3.21 1.03 11.6 6
8.7 0.78 0.51 1.7 0.415 12 66 0.99623 3 1.17 9.2 5
7.7 0.75 0.27 3.8 0.11 34 89 0.99664 3.24 0.45 9.3 5
6.8 0.815 0 1.2 0.267 16 29 0.99471 3.32 0.51 9.8 3
7.2 0.56 0.26 2 0.083 13 100 0.99586 3.26 0.52 9.9 5
8.2 0.885 0.2 1.4 0.086 7 31 0.9946 3.11 0.46 10 5
5.2 0.49 0.26 2.3 0.09 23 74 0.9953 3.71 0.62 12.2 6
7.2 0.45 0.15 2 0.078 10 28 0.99609 3.29 0.51 9.9 6
7.5 0.57 0.02 2.6 0.077 11 35 0.99557 3.36 0.62 10.8 6
7.5 0.57 0.02 2.6 0.077 11 35 0.99557 3.36 0.62 10.8 6
6.8 0.83 0.09 1.8 0.074 4 25 0.99534 3.38 0.45 9.6 5
8 0.6 0.22 2.1 0.08 25 105 0.99613 3.3 0.49 9.9 5
8 0.6 0.22 2.1 0.08 25 105 0.99613 3.3 0.49 9.9 5
7.1 0.755 0.15 1.8 0.107 20 84 0.99593 3.19 0.5 9.5 5
8 0.81 0.25 3.4 0.076 34 85 0.99668 3.19 0.42 9.2 5
7.4 0.64 0.07 1.8 0.1 8 23 0.9961 3.3 0.58 9.6 5
7.4 0.64 0.07 1.8 0.1 8 23 0.9961 3.3 0.58 9.6 5
6.6 0.64 0.31 6.1 0.083 7 49 0.99718 3.35 0.68 10.3 5
6.7 0.48 0.02 2.2 0.08 36 111 0.99524 3.1 0.53 9.7 5
6 0.49 0 2.3 0.068 15 33 0.99292 3.58 0.59 12.5 6
8 0.64 0.22 2.4 0.094 5 33 0.99612 3.37 0.58 11 5
7.1 0.62 0.06 1.3 0.07 5 12 0.9942 3.17 0.48 9.8 5
8 0.52 0.25 2 0.078 19 59 0.99612 3.3 0.48 10.2 5
6.4 0.57 0.14 3.9 0.07 27 73 0.99669 3.32 0.48 9.2 5
8.6 0.685 0.1 1.6 0.092 3 12 0.99745 3.31 0.65 9.55 6
8.7 0.675 0.1 1.6 0.09 4 11 0.99745 3.31 0.65 9.55 5
7.3 0.59 0.26 2 0.08 17 104 0.99584 3.28 0.52 9.9 5
7 0.6 0.12 2.2 0.083 13 28 0.9966 3.52 0.62 10.2 7
7.2 0.67 0 2.2 0.068 10 24 0.9956 3.42 0.72 11.1 6
7.9 0.69 0.21 2.1 0.08 33 141 0.9962 3.25 0.51 9.9 5
7.9 0.69 0.21 2.1 0.08 33 141 0.9962 3.25 0.51 9.9 5
7.6 0.3 0.42 2 0.052 6 24 0.9963 3.44 0.82 11.9 6
7.2 0.33 0.33 1.7 0.061 3 13 0.996 3.23 1.1 10 8
8 0.5 0.39 2.6 0.082 12 46 0.9985 3.43 0.62 10.7 6
7.7 0.28 0.3 2 0.062 18 34 0.9952 3.28 0.9 11.3 7
8.2 0.24 0.34 5.1 0.062 8 22 0.9974 3.22 0.94 10.9 6
6 0.51 0 2.1 0.064 40 54 0.995 3.54 0.93 10.7 6
8.1 0.29 0.36 2.2 0.048 35 53 0.995 3.27 1.01 12.4 7
6 0.51 0 2.1 0.064 40 54 0.995 3.54 0.93 10.7 6
6.6 0.96 0 1.8 0.082 5 16 0.9936 3.5 0.44 11.9 6
6.4 0.47 0.4 2.4 0.071 8 19 0.9963 3.56 0.73 10.6 6
8.2 0.24 0.34 5.1 0.062 8 22 0.9974 3.22 0.94 10.9 6
9.9 0.57 0.25 2 0.104 12 89 0.9963 3.04 0.9 10.1 5
10 0.32 0.59 2.2 0.077 3 15 0.9994 3.2 0.78 9.6 5
6.2 0.58 0 1.6 0.065 8 18 0.9966 3.56 0.84 9.4 5
10 0.32 0.59 2.2 0.077 3 15 0.9994 3.2 0.78 9.6 5
7.3 0.34 0.33 2.5 0.064 21 37 0.9952 3.35 0.77 12.1 7
7.8 0.53 0.01 1.6 0.077 3 19 0.995 3.16 0.46 9.8 5
7.7 0.64 0.21 2.2 0.077 32 133 0.9956 3.27 0.45 9.9 5
7.8 0.53 0.01 1.6 0.077 3 19 0.995 3.16 0.46 9.8 5
7.5 0.4 0.18 1.6 0.079 24 58 0.9965 3.34 0.58 9.4 5
7 0.54 0 2.1 0.079 39 55 0.9956 3.39 0.84 11.4 6
6.4 0.53 0.09 3.9 0.123 14 31 0.9968 3.5 0.67 11 4
8.3 0.26 0.37 1.4 0.076 8 23 0.9974 3.26 0.7 9.6 6
8.3 0.26 0.37 1.4 0.076 8 23 0.9974 3.26 0.7 9.6 6
7.7 0.23 0.37 1.8 0.046 23 60 0.9971 3.41 0.71 12.1 6
7.6 0.41 0.33 2.5 0.078 6 23 0.9957 3.3 0.58 11.2 5
7.8 0.64 0 1.9 0.072 27 55 0.9962 3.31 0.63 11 5
7.9 0.18 0.4 2.2 0.049 38 67 0.996 3.33 0.93 11.3 5
7.4 0.41 0.24 1.8 0.066 18 47 0.9956 3.37 0.62 10.4 5
7.6 0.43 0.31 2.1 0.069 13 74 0.9958 3.26 0.54 9.9 6
5.9 0.44 0 1.6 0.042 3 11 0.9944 3.48 0.85 11.7 6
6.1 0.4 0.16 1.8 0.069 11 25 0.9955 3.42 0.74 10.1 7
10.2 0.54 0.37 15.4 0.214 55 95 1.00369 3.18 0.77 9 6
10.2 0.54 0.37 15.4 0.214 55 95 1.00369 3.18 0.77 9 6
10 0.38 0.38 1.6 0.169 27 90 0.99914 3.15 0.65 8.5 5
6.8 0.915 0.29 4.8 0.07 15 39 0.99577 3.53 0.54 11.1 5
7 0.59 0 1.7 0.052 3 8 0.996 3.41 0.47 10.3 5
7.3 0.67 0.02 2.2 0.072 31 92 0.99566 3.32 0.68 11.0666666666667 6
7.2 0.37 0.32 2 0.062 15 28 0.9947 3.23 0.73 11.3 7
7.4 0.785 0.19 5.2 0.094 19 98 0.99713 3.16 0.52 9.56666666666667 6
6.9 0.63 0.02 1.9 0.078 18 30 0.99712 3.4 0.75 9.8 5
6.9 0.58 0.2 1.75 0.058 8 22 0.99322 3.38 0.49 11.7 5
7.3 0.67 0.02 2.2 0.072 31 92 0.99566 3.32 0.68 11.1 6
7.4 0.785 0.19 5.2 0.094 19 98 0.99713 3.16 0.52 9.6 6
6.9 0.63 0.02 1.9 0.078 18 30 0.99712 3.4 0.75 9.8 5
6.8 0.67 0 1.9 0.08 22 39 0.99701 3.4 0.74 9.7 5
6.9 0.58 0.01 1.9 0.08 40 54 0.99683 3.4 0.73 9.7 5
7.2 0.38 0.31 2 0.056 15 29 0.99472 3.23 0.76 11.3 8
7.2 0.37 0.32 2 0.062 15 28 0.9947 3.23 0.73 11.3 7
7.8 0.32 0.44 2.7 0.104 8 17 0.99732 3.33 0.78 11 7
6.6 0.58 0.02 2 0.062 37 53 0.99374 3.35 0.76 11.6 7
7.6 0.49 0.33 1.9 0.074 27 85 0.99706 3.41 0.58 9 5
11.7 0.45 0.63 2.2 0.073 7 23 0.99974 3.21 0.69 10.9 6
6.5 0.9 0 1.6 0.052 9 17 0.99467 3.5 0.63 10.9 6
6 0.54 0.06 1.8 0.05 38 89 0.99236 3.3 0.5 10.55 6
7.6 0.49 0.33 1.9 0.074 27 85 0.99706 3.41 0.58 9 5
8.4 0.29 0.4 1.7 0.067 8 20 0.99603 3.39 0.6 10.5 5
7.9 0.2 0.35 1.7 0.054 7 15 0.99458 3.32 0.8 11.9 7
6.4 0.42 0.09 2.3 0.054 34 64 0.99724 3.41 0.68 10.4 6
6.2 0.785 0 2.1 0.06 6 13 0.99664 3.59 0.61 10 4
6.8 0.64 0.03 2.3 0.075 14 31 0.99545 3.36 0.58 10.4 6
6.9 0.63 0.01 2.4 0.076 14 39 0.99522 3.34 0.53 10.8 6
6.8 0.59 0.1 1.7 0.063 34 53 0.9958 3.41 0.67 9.7 5
6.8 0.59 0.1 1.7 0.063 34 53 0.9958 3.41 0.67 9.7 5
7.3 0.48 0.32 2.1 0.062 31 54 0.99728 3.3 0.65 10 7
6.7 1.04 0.08 2.3 0.067 19 32 0.99648 3.52 0.57 11 4
7.3 0.48 0.32 2.1 0.062 31 54 0.99728 3.3 0.65 10 7
7.3 0.98 0.05 2.1 0.061 20 49 0.99705 3.31 0.55 9.7 3
10 0.69 0.11 1.4 0.084 8 24 0.99578 2.88 0.47 9.7 5
6.7 0.7 0.08 3.75 0.067 8 16 0.99334 3.43 0.52 12.6 5
7.6 0.35 0.6 2.6 0.073 23 44 0.99656 3.38 0.79 11.1 6
6.1 0.6 0.08 1.8 0.071 14 45 0.99336 3.38 0.54 11 5
9.9 0.5 0.5 13.8 0.205 48 82 1.00242 3.16 0.75 8.8 5
5.3 0.47 0.11 2.2 0.048 16 89 0.99182 3.54 0.88 13.5666666666667 7
9.9 0.5 0.5 13.8 0.205 48 82 1.00242 3.16 0.75 8.8 5
5.3 0.47 0.11 2.2 0.048 16 89 0.99182 3.54 0.88 13.6 7
7.1 0.875 0.05 5.7 0.082 3 14 0.99808 3.4 0.52 10.2 3
8.2 0.28 0.6 3 0.104 10 22 0.99828 3.39 0.68 10.6 5
5.6 0.62 0.03 1.5 0.08 6 13 0.99498 3.66 0.62 10.1 4
8.2 0.28 0.6 3 0.104 10 22 0.99828 3.39 0.68 10.6 5
7.2 0.58 0.54 2.1 0.114 3 9 0.99719 3.33 0.57 10.3 4
8.1 0.33 0.44 1.5 0.042 6 12 0.99542 3.35 0.61 10.7 5
6.8 0.91 0.06 2 0.06 4 11 0.99592 3.53 0.64 10.9 4
7 0.655 0.16 2.1 0.074 8 25 0.99606 3.37 0.55 9.7 5
6.8 0.68 0.21 2.1 0.07 9 23 0.99546 3.38 0.6 10.3 5
6 0.64 0.05 1.9 0.066 9 17 0.99496 3.52 0.78 10.6 5
5.6 0.54 0.04 1.7 0.049 5 13 0.9942 3.72 0.58 11.4 5
6.2 0.57 0.1 2.1 0.048 4 11 0.99448 3.44 0.76 10.8 6
7.1 0.22 0.49 1.8 0.039 8 18 0.99344 3.39 0.56 12.4 6
5.6 0.54 0.04 1.7 0.049 5 13 0.9942 3.72 0.58 11.4 5
6.2 0.65 0.06 1.6 0.05 6 18 0.99348 3.57 0.54 11.95 5
7.7 0.54 0.26 1.9 0.089 23 147 0.99636 3.26 0.59 9.7 5
6.4 0.31 0.09 1.4 0.066 15 28 0.99459 3.42 0.7 10 7
7 0.43 0.02 1.9 0.08 15 28 0.99492 3.35 0.81 10.6 6
7.7 0.54 0.26 1.9 0.089 23 147 0.99636 3.26 0.59 9.7 5
6.9 0.74 0.03 2.3 0.054 7 16 0.99508 3.45 0.63 11.5 6
6.6 0.895 0.04 2.3 0.068 7 13 0.99582 3.53 0.58 10.8 6
6.9 0.74 0.03 2.3 0.054 7 16 0.99508 3.45 0.63 11.5 6
7.5 0.725 0.04 1.5 0.076 8 15 0.99508 3.26 0.53 9.6 5
7.8 0.82 0.29 4.3 0.083 21 64 0.99642 3.16 0.53 9.4 5
7.3 0.585 0.18 2.4 0.078 15 60 0.99638 3.31 0.54 9.8 5
6.2 0.44 0.39 2.5 0.077 6 14 0.99555 3.51 0.69 11 6
7.5 0.38 0.57 2.3 0.106 5 12 0.99605 3.36 0.55 11.4 6
6.7 0.76 0.02 1.8 0.078 6 12 0.996 3.55 0.63 9.95 3
6.8 0.81 0.05 2 0.07 6 14 0.99562 3.51 0.66 10.8 6
7.5 0.38 0.57 2.3 0.106 5 12 0.99605 3.36 0.55 11.4 6
7.1 0.27 0.6 2.1 0.074 17 25 0.99814 3.38 0.72 10.6 6
7.9 0.18 0.4 1.8 0.062 7 20 0.9941 3.28 0.7 11.1 5
6.4 0.36 0.21 2.2 0.047 26 48 0.99661 3.47 0.77 9.7 6
7.1 0.69 0.04 2.1 0.068 19 27 0.99712 3.44 0.67 9.8 5
6.4 0.79 0.04 2.2 0.061 11 17 0.99588 3.53 0.65 10.4 6
6.4 0.56 0.15 1.8 0.078 17 65 0.99294 3.33 0.6 10.5 6
6.9 0.84 0.21 4.1 0.074 16 65 0.99842 3.53 0.72 9.23333333333333 6
6.9 0.84 0.21 4.1 0.074 16 65 0.99842 3.53 0.72 9.25 6
6.1 0.32 0.25 2.3 0.071 23 58 0.99633 3.42 0.97 10.6 5
6.5 0.53 0.06 2 0.063 29 44 0.99489 3.38 0.83 10.3 6
7.4 0.47 0.46 2.2 0.114 7 20 0.99647 3.32 0.63 10.5 5
6.6 0.7 0.08 2.6 0.106 14 27 0.99665 3.44 0.58 10.2 5
6.5 0.53 0.06 2 0.063 29 44 0.99489 3.38 0.83 10.3 6
6.9 0.48 0.2 1.9 0.082 9 23 0.99585 3.39 0.43 9.05 4
6.1 0.32 0.25 2.3 0.071 23 58 0.99633 3.42 0.97 10.6 5
6.8 0.48 0.25 2 0.076 29 61 0.9953 3.34 0.6 10.4 5
6 0.42 0.19 2 0.075 22 47 0.99522 3.39 0.78 10 6
6.7 0.48 0.08 2.1 0.064 18 34 0.99552 3.33 0.64 9.7 5
6.8 0.47 0.08 2.2 0.064 18 38 0.99553 3.3 0.65 9.6 6
7.1 0.53 0.07 1.7 0.071 15 24 0.9951 3.29 0.66 10.8 6
7.9 0.29 0.49 2.2 0.096 21 59 0.99714 3.31 0.67 10.1 6
7.1 0.69 0.08 2.1 0.063 42 52 0.99608 3.42 0.6 10.2 6
6.6 0.44 0.09 2.2 0.063 9 18 0.99444 3.42 0.69 11.3 6
6.1 0.705 0.1 2.8 0.081 13 28 0.99631 3.6 0.66 10.2 5
7.2 0.53 0.13 2 0.058 18 22 0.99573 3.21 0.68 9.9 6
8 0.39 0.3 1.9 0.074 32 84 0.99717 3.39 0.61 9 5
6.6 0.56 0.14 2.4 0.064 13 29 0.99397 3.42 0.62 11.7 7
7 0.55 0.13 2.2 0.075 15 35 0.9959 3.36 0.59 9.7 6
6.1 0.53 0.08 1.9 0.077 24 45 0.99528 3.6 0.68 10.3 6
5.4 0.58 0.08 1.9 0.059 20 31 0.99484 3.5 0.64 10.2 6
6.2 0.64 0.09 2.5 0.081 15 26 0.99538 3.57 0.63 12 5
7.2 0.39 0.32 1.8 0.065 34 60 0.99714 3.46 0.78 9.9 5
6.2 0.52 0.08 4.4 0.071 11 32 0.99646 3.56 0.63 11.6 6
7.4 0.25 0.29 2.2 0.054 19 49 0.99666 3.4 0.76 10.9 7
6.7 0.855 0.02 1.9 0.064 29 38 0.99472 3.3 0.56 10.75 6
11.1 0.44 0.42 2.2 0.064 14 19 0.99758 3.25 0.57 10.4 6
8.4 0.37 0.43 2.3 0.063 12 19 0.9955 3.17 0.81 11.2 7
6.5 0.63 0.33 1.8 0.059 16 28 0.99531 3.36 0.64 10.1 6
7 0.57 0.02 2 0.072 17 26 0.99575 3.36 0.61 10.2 5
6.3 0.6 0.1 1.6 0.048 12 26 0.99306 3.55 0.51 12.1 5
11.2 0.4 0.5 2 0.099 19 50 0.99783 3.1 0.58 10.4 5
7.4 0.36 0.3 1.8 0.074 17 24 0.99419 3.24 0.7 11.4 8
7.1 0.68 0 2.3 0.087 17 26 0.99783 3.45 0.53 9.5 5
7.1 0.67 0 2.3 0.083 18 27 0.99768 3.44 0.54 9.4 5
6.3 0.68 0.01 3.7 0.103 32 54 0.99586 3.51 0.66 11.3 6
7.3 0.735 0 2.2 0.08 18 28 0.99765 3.41 0.6 9.4 5
6.6 0.855 0.02 2.4 0.062 15 23 0.99627 3.54 0.6 11 6
7 0.56 0.17 1.7 0.065 15 24 0.99514 3.44 0.68 10.55 7
6.6 0.88 0.04 2.2 0.066 12 20 0.99636 3.53 0.56 9.9 5
6.6 0.855 0.02 2.4 0.062 15 23 0.99627 3.54 0.6 11 6
6.9 0.63 0.33 6.7 0.235 66 115 0.99787 3.22 0.56 9.5 5
7.8 0.6 0.26 2 0.08 31 131 0.99622 3.21 0.52 9.9 5
7.8 0.6 0.26 2 0.08 31 131 0.99622 3.21 0.52 9.9 5
7.8 0.6 0.26 2 0.08 31 131 0.99622 3.21 0.52 9.9 5
7.2 0.695 0.13 2 0.076 12 20 0.99546 3.29 0.54 10.1 5
7.2 0.695 0.13 2 0.076 12 20 0.99546 3.29 0.54 10.1 5
7.2 0.695 0.13 2 0.076 12 20 0.99546 3.29 0.54 10.1 5
6.7 0.67 0.02 1.9 0.061 26 42 0.99489 3.39 0.82 10.9 6
6.7 0.16 0.64 2.1 0.059 24 52 0.99494 3.34 0.71 11.2 6
7.2 0.695 0.13 2 0.076 12 20 0.99546 3.29 0.54 10.1 5
7 0.56 0.13 1.6 0.077 25 42 0.99629 3.34 0.59 9.2 5
6.2 0.51 0.14 1.9 0.056 15 34 0.99396 3.48 0.57 11.5 6
6.4 0.36 0.53 2.2 0.23 19 35 0.9934 3.37 0.93 12.4 6
6.4 0.38 0.14 2.2 0.038 15 25 0.99514 3.44 0.65 11.1 6
7.3 0.69 0.32 2.2 0.069 35 104 0.99632 3.33 0.51 9.5 5
6 0.58 0.2 2.4 0.075 15 50 0.99467 3.58 0.67 12.5 6
5.6 0.31 0.78 13.9 0.074 23 92 0.99677 3.39 0.48 10.5 6
7.5 0.52 0.4 2.2 0.06 12 20 0.99474 3.26 0.64 11.8 6
8 0.3 0.63 1.6 0.081 16 29 0.99588 3.3 0.78 10.8 6
6.2 0.7 0.15 5.1 0.076 13 27 0.99622 3.54 0.6 11.9 6
6.8 0.67 0.15 1.8 0.118 13 20 0.9954 3.42 0.67 11.3 6
6.2 0.56 0.09 1.7 0.053 24 32 0.99402 3.54 0.6 11.3 5
7.4 0.35 0.33 2.4 0.068 9 26 0.9947 3.36 0.6 11.9 6
6.2 0.56 0.09 1.7 0.053 24 32 0.99402 3.54 0.6 11.3 5
6.1 0.715 0.1 2.6 0.053 13 27 0.99362 3.57 0.5 11.9 5
6.2 0.46 0.29 2.1 0.074 32 98 0.99578 3.33 0.62 9.8 5
6.7 0.32 0.44 2.4 0.061 24 34 0.99484 3.29 0.8 11.6 7
7.2 0.39 0.44 2.6 0.066 22 48 0.99494 3.3 0.84 11.5 6
7.5 0.31 0.41 2.4 0.065 34 60 0.99492 3.34 0.85 11.4 6
5.8 0.61 0.11 1.8 0.066 18 28 0.99483 3.55 0.66 10.9 6
7.2 0.66 0.33 2.5 0.068 34 102 0.99414 3.27 0.78 12.8 6
6.6 0.725 0.2 7.8 0.073 29 79 0.9977 3.29 0.54 9.2 5
6.3 0.55 0.15 1.8 0.077 26 35 0.99314 3.32 0.82 11.6 6
5.4 0.74 0.09 1.7 0.089 16 26 0.99402 3.67 0.56 11.6 6
6.3 0.51 0.13 2.3 0.076 29 40 0.99574 3.42 0.75 11 6
6.8 0.62 0.08 1.9 0.068 28 38 0.99651 3.42 0.82 9.5 6
6.2 0.6 0.08 2 0.09 32 44 0.9949 3.45 0.58 10.5 5
5.9 0.55 0.1 2.2 0.062 39 51 0.99512 3.52 0.76 11.2 6
6.3 0.51 0.13 2.3 0.076 29 40 0.99574 3.42 0.75 11 6
5.9 0.645 0.12 2 0.075 32 44 0.99547 3.57 0.71 10.2 5
6 0.31 0.47 3.6 0.067 18 42 0.99549 3.39 0.66 11 6
