# Supplementary material
Source: ML conference proceedings conference paper supplement (https://proceedings.neurips.cc/paper_files/paper/2020/hash/aab085461de182608ee9f607f3f7d18f-Abstract.html)
Supplement: Supplementary file 16 [file aab085461de182608ee9f607f3f7d18f-Supplemental.zip › supplemental/evidential_regression/data/uci/wine-quality/winequality-red.csv]

fixed acidity	volatile acidity	citric acid	residual sugar	chlorides	free sulfur dioxide	total sulfur dioxide	density	pH	sulphates	alcohol	quality
7.4	0.7	0	1.9	0.076	11	34	0.9978	3.51	0.56	9.4	5
7.8	0.88	0	2.6	0.098	25	67	0.9968	3.2	0.68	9.8	5
7.8	0.76	0.04	2.3	0.092	15	54	0.997	3.26	0.65	9.8	5
11.2	0.28	0.56	1.9	0.075	17	60	0.998	3.16	0.58	9.8	6
7.4	0.7	0	1.9	0.076	11	34	0.9978	3.51	0.56	9.4	5
7.4	0.66	0	1.8	0.075	13	40	0.9978	3.51	0.56	9.4	5
7.9	0.6	0.06	1.6	0.069	15	59	0.9964	3.3	0.46	9.4	5
7.3	0.65	0	1.2	0.065	15	21	0.9946	3.39	0.47	10	7
7.8	0.58	0.02	2	0.073	9	18	0.9968	3.36	0.57	9.5	7
7.5	0.5	0.36	6.1	0.071	17	102	0.9978	3.35	0.8	10.5	5
6.7	0.58	0.08	1.8	0.097	15	65	0.9959	3.28	0.54	9.2	5
7.5	0.5	0.36	6.1	0.071	17	102	0.9978	3.35	0.8	10.5	5
5.6	0.615	0	1.6	0.089	16	59	0.9943	3.58	0.52	9.9	5
7.8	0.61	0.29	1.6	0.114	9	29	0.9974	3.26	1.56	9.1	5
8.9	0.62	0.18	3.8	0.176	52	145	0.9986	3.16	0.88	9.2	5
8.9	0.62	0.19	3.9	0.17	51	148	0.9986	3.17	0.93	9.2	5
8.5	0.28	0.56	1.8	0.092	35	103	0.9969	3.3	0.75	10.5	7
8.1	0.56	0.28	1.7	0.368	16	56	0.9968	3.11	1.28	9.3	5
7.4	0.59	0.08	4.4	0.086	6	29	0.9974	3.38	0.5	9	4
7.9	0.32	0.51	1.8	0.341	17	56	0.9969	3.04	1.08	9.2	6
8.9	0.22	0.48	1.8	0.077	29	60	0.9968	3.39	0.53	9.4	6
7.6	0.39	0.31	2.3	0.082	23	71	0.9982	3.52	0.65	9.7	5
7.9	0.43	0.21	1.6	0.106	10	37	0.9966	3.17	0.91	9.5	5
8.5	0.49	0.11	2.3	0.084	9	67	0.9968	3.17	0.53	9.4	5
6.9	0.4	0.14	2.4	0.085	21	40	0.9968	3.43	0.63	9.7	6
6.3	0.39	0.16	1.4	0.08	11	23	0.9955	3.34	0.56	9.3	5
7.6	0.41	0.24	1.8	0.08	4	11	0.9962	3.28	0.59	9.5	5
7.9	0.43	0.21	1.6	0.106	10	37	0.9966	3.17	0.91	9.5	5
7.1	0.71	0	1.9	0.08	14	35	0.9972	3.47	0.55	9.4	5
7.8	0.645	0	2	0.082	8	16	0.9964	3.38	0.59	9.8	6
6.7	0.675	0.07	2.4	0.089	17	82	0.9958	3.35	0.54	10.1	5
6.9	0.685	0	2.5	0.105	22	37	0.9966	3.46	0.57	10.6	6
8.3	0.655	0.12	2.3	0.083	15	113	0.9966	3.17	0.66	9.8	5
6.9	0.605	0.12	10.7	0.073	40	83	0.9993	3.45	0.52	9.4	6
5.2	0.32	0.25	1.8	0.103	13	50	0.9957	3.38	0.55	9.2	5
7.8	0.645	0	5.5	0.086	5	18	0.9986	3.4	0.55	9.6	6
7.8	0.6	0.14	2.4	0.086	3	15	0.9975	3.42	0.6	10.8	6
8.1	0.38	0.28	2.1	0.066	13	30	0.9968	3.23	0.73	9.7	7
5.7	1.13	0.09	1.5	0.172	7	19	0.994	3.5	0.48	9.8	4
7.3	0.45	0.36	5.9	0.074	12	87	0.9978	3.33	0.83	10.5	5
7.3	0.45	0.36	5.9	0.074	12	87	0.9978	3.33	0.83	10.5	5
8.8	0.61	0.3	2.8	0.088	17	46	0.9976	3.26	0.51	9.3	4
7.5	0.49	0.2	2.6	0.332	8	14	0.9968	3.21	0.9	10.5	6
8.1	0.66	0.22	2.2	0.069	9	23	0.9968	3.3	1.2	10.3	5
6.8	0.67	0.02	1.8	0.05	5	11	0.9962	3.48	0.52	9.5	5
4.6	0.52	0.15	2.1	0.054	8	65	0.9934	3.9	0.56	13.1	4
7.7	0.935	0.43	2.2	0.114	22	114	0.997	3.25	0.73	9.2	5
8.7	0.29	0.52	1.6	0.113	12	37	0.9969	3.25	0.58	9.5	5
6.4	0.4	0.23	1.6	0.066	5	12	0.9958	3.34	0.56	9.2	5
5.6	0.31	0.37	1.4	0.074	12	96	0.9954	3.32	0.58	9.2	5
8.8	0.66	0.26	1.7	0.074	4	23	0.9971	3.15	0.74	9.2	5
6.6	0.52	0.04	2.2	0.069	8	15	0.9956	3.4	0.63	9.4	6
6.6	0.5	0.04	2.1	0.068	6	14	0.9955	3.39	0.64	9.4	6
8.6	0.38	0.36	3	0.081	30	119	0.997	3.2	0.56	9.4	5
7.6	0.51	0.15	2.8	0.11	33	73	0.9955	3.17	0.63	10.2	6
7.7	0.62	0.04	3.8	0.084	25	45	0.9978	3.34	0.53	9.5	5
10.2	0.42	0.57	3.4	0.07	4	10	0.9971	3.04	0.63	9.6	5
7.5	0.63	0.12	5.1	0.111	50	110	0.9983	3.26	0.77	9.4	5
7.8	0.59	0.18	2.3	0.076	17	54	0.9975	3.43	0.59	10	5
7.3	0.39	0.31	2.4	0.074	9	46	0.9962	3.41	0.54	9.4	6
8.8	0.4	0.4	2.2	0.079	19	52	0.998	3.44	0.64	9.2	5
7.7	0.69	0.49	1.8	0.115	20	112	0.9968	3.21	0.71	9.3	5
7.5	0.52	0.16	1.9	0.085	12	35	0.9968	3.38	0.62	9.5	7
7	0.735	0.05	2	0.081	13	54	0.9966	3.39	0.57	9.8	5
7.2	0.725	0.05	4.65	0.086	4	11	0.9962	3.41	0.39	10.9	5
7.2	0.725	0.05	4.65	0.086	4	11	0.9962	3.41	0.39	10.9	5
7.5	0.52	0.11	1.5	0.079	11	39	0.9968	3.42	0.58	9.6	5
6.6	0.705	0.07	1.6	0.076	6	15	0.9962	3.44	0.58	10.7	5
9.3	0.32	0.57	2	0.074	27	65	0.9969	3.28	0.79	10.7	5
8	0.705	0.05	1.9	0.074	8	19	0.9962	3.34	0.95	10.5	6
7.7	0.63	0.08	1.9	0.076	15	27	0.9967	3.32	0.54	9.5	6
7.7	0.67	0.23	2.1	0.088	17	96	0.9962	3.32	0.48	9.5	5
7.7	0.69	0.22	1.9	0.084	18	94	0.9961	3.31	0.48	9.5	5
8.3	0.675	0.26	2.1	0.084	11	43	0.9976	3.31	0.53	9.2	4
9.7	0.32	0.54	2.5	0.094	28	83	0.9984	3.28	0.82	9.6	5
8.8	0.41	0.64	2.2	0.093	9	42	0.9986	3.54	0.66	10.5	5
8.8	0.41	0.64	2.2	0.093	9	42	0.9986	3.54	0.66	10.5	5
6.8	0.785	0	2.4	0.104	14	30	0.9966	3.52	0.55	10.7	6
6.7	0.75	0.12	2	0.086	12	80	0.9958	3.38	0.52	10.1	5
8.3	0.625	0.2	1.5	0.08	27	119	0.9972	3.16	1.12	9.1	4
6.2	0.45	0.2	1.6	0.069	3	15	0.9958	3.41	0.56	9.2	5
7.8	0.43	0.7	1.9	0.464	22	67	0.9974	3.13	1.28	9.4	5
7.4	0.5	0.47	2	0.086	21	73	0.997	3.36	0.57	9.1	5
7.3	0.67	0.26	1.8	0.401	16	51	0.9969	3.16	1.14	9.4	5
6.3	0.3	0.48	1.8	0.069	18	61	0.9959	3.44	0.78	10.3	6
6.9	0.55	0.15	2.2	0.076	19	40	0.9961	3.41	0.59	10.1	5
8.6	0.49	0.28	1.9	0.11	20	136	0.9972	2.93	1.95	9.9	6
7.7	0.49	0.26	1.9	0.062	9	31	0.9966	3.39	0.64	9.6	5
9.3	0.39	0.44	2.1	0.107	34	125	0.9978	3.14	1.22	9.5	5
7	0.62	0.08	1.8	0.076	8	24	0.9978	3.48	0.53	9	5
7.9	0.52	0.26	1.9	0.079	42	140	0.9964	3.23	0.54	9.5	5
8.6	0.49	0.28	1.9	0.11	20	136	0.9972	2.93	1.95	9.9	6
8.6	0.49	0.29	2	0.11	19	133	0.9972	2.93	1.98	9.8	5
7.7	0.49	0.26	1.9	0.062	9	31	0.9966	3.39	0.64	9.6	5
5	1.02	0.04	1.4	0.045	41	85	0.9938	3.75	0.48	10.5	4
4.7	0.6	0.17	2.3	0.058	17	106	0.9932	3.85	0.6	12.9	6
6.8	0.775	0	3	0.102	8	23	0.9965	3.45	0.56	10.7	5
7	0.5	0.25	2	0.07	3	22	0.9963	3.25	0.63	9.2	5
7.6	0.9	0.06	2.5	0.079	5	10	0.9967	3.39	0.56	9.8	5
8.1	0.545	0.18	1.9	0.08	13	35	0.9972	3.3	0.59	9	6
8.3	0.61	0.3	2.1	0.084	11	50	0.9972	3.4	0.61	10.2	6
7.8	0.5	0.3	1.9	0.075	8	22	0.9959	3.31	0.56	10.4	6
8.1	0.545	0.18	1.9	0.08	13	35	0.9972	3.3	0.59	9	6
8.1	0.575	0.22	2.1	0.077	12	65	0.9967	3.29	0.51	9.2	5
7.2	0.49	0.24	2.2	0.07	5	36	0.996	3.33	0.48	9.4	5
8.1	0.575	0.22	2.1	0.077	12	65	0.9967	3.29	0.51	9.2	5
7.8	0.41	0.68	1.7	0.467	18	69	0.9973	3.08	1.31	9.3	5
6.2	0.63	0.31	1.7	0.088	15	64	0.9969	3.46	0.79	9.3	5
8	0.33	0.53	2.5	0.091	18	80	0.9976	3.37	0.8	9.6	6
8.1	0.785	0.52	2	0.122	37	153	0.9969	3.21	0.69	9.3	5
7.8	0.56	0.19	1.8	0.104	12	47	0.9964	3.19	0.93	9.5	5
8.4	0.62	0.09	2.2	0.084	11	108	0.9964	3.15	0.66	9.8	5
8.4	0.6	0.1	2.2	0.085	14	111	0.9964	3.15	0.66	9.8	5
10.1	0.31	0.44	2.3	0.08	22	46	0.9988	3.32	0.67	9.7	6
7.8	0.56	0.19	1.8	0.104	12	47	0.9964	3.19	0.93	9.5	5
9.4	0.4	0.31	2.2	0.09	13	62	0.9966	3.07	0.63	10.5	6
8.3	0.54	0.28	1.9	0.077	11	40	0.9978	3.39	0.61	10	6
7.8	0.56	0.12	2	0.082	7	28	0.997	3.37	0.5	9.4	6
8.8	0.55	0.04	2.2	0.119	14	56	0.9962	3.21	0.6	10.9	6
7	0.69	0.08	1.8	0.097	22	89	0.9959	3.34	0.54	9.2	6
7.3	1.07	0.09	1.7	0.178	10	89	0.9962	3.3	0.57	9	5
8.8	0.55	0.04	2.2	0.119	14	56	0.9962	3.21	0.6	10.9	6
7.3	0.695	0	2.5	0.075	3	13	0.998	3.49	0.52	9.2	5
8	0.71	0	2.6	0.08	11	34	0.9976	3.44	0.53	9.5	5
7.8	0.5	0.17	1.6	0.082	21	102	0.996	3.39	0.48	9.5	5
9	0.62	0.04	1.9	0.146	27	90	0.9984	3.16	0.7	9.4	5
8.2	1.33	0	1.7	0.081	3	12	0.9964	3.53	0.49	10.9	5
8.1	1.33	0	1.8	0.082	3	12	0.9964	3.54	0.48	10.9	5
8	0.59	0.16	1.8	0.065	3	16	0.9962	3.42	0.92	10.5	7
6.1	0.38	0.15	1.8	0.072	6	19	0.9955	3.42	0.57	9.4	5
8	0.745	0.56	2	0.118	30	134	0.9968	3.24	0.66	9.4	5
5.6	0.5	0.09	2.3	0.049	17	99	0.9937	3.63	0.63	13	5
5.6	0.5	0.09	2.3	0.049	17	99	0.9937	3.63	0.63	13	5
6.6	0.5	0.01	1.5	0.06	17	26	0.9952	3.4	0.58	9.8	6
7.9	1.04	0.05	2.2	0.084	13	29	0.9959	3.22	0.55	9.9	6
8.4	0.745	0.11	1.9	0.09	16	63	0.9965	3.19	0.82	9.6	5
8.3	0.715	0.15	1.8	0.089	10	52	0.9968	3.23	0.77	9.5	5
7.2	0.415	0.36	2	0.081	13	45	0.9972	3.48	0.64	9.2	5
7.8	0.56	0.19	2.1	0.081	15	105	0.9962	3.33	0.54	9.5	5
7.8	0.56	0.19	2	0.081	17	108	0.9962	3.32	0.54	9.5	5
8.4	0.745	0.11	1.9	0.09	16	63	0.9965	3.19	0.82	9.6	5
8.3	0.715	0.15	1.8	0.089	10	52	0.9968	3.23	0.77	9.5	5
5.2	0.34	0	1.8	0.05	27	63	0.9916	3.68	0.79	14	6
6.3	0.39	0.08	1.7	0.066	3	20	0.9954	3.34	0.58	9.4	5
5.2	0.34	0	1.8	0.05	27	63	0.9916	3.68	0.79	14	6
8.1	0.67	0.55	1.8	0.117	32	141	0.9968	3.17	0.62	9.4	5
5.8	0.68	0.02	1.8	0.087	21	94	0.9944	3.54	0.52	10	5
7.6	0.49	0.26	1.6	0.236	10	88	0.9968	3.11	0.8	9.3	5
6.9	0.49	0.1	2.3	0.074	12	30	0.9959	3.42	0.58	10.2	6
8.2	0.4	0.44	2.8	0.089	11	43	0.9975	3.53	0.61	10.5	6
7.3	0.33	0.47	2.1	0.077	5	11	0.9958	3.33	0.53	10.3	6
9.2	0.52	1	3.4	0.61	32	69	0.9996	2.74	2.0	9.4	4
7.5	0.6	0.03	1.8	0.095	25	99	0.995	3.35	0.54	10.1	5
7.5	0.6	0.03	1.8	0.095	25	99	0.995	3.35	0.54	10.1	5
7.1	0.43	0.42	5.5	0.07	29	129	0.9973	3.42	0.72	10.5	5
7.1	0.43	0.42	5.5	0.071	28	128	0.9973	3.42	0.71	10.5	5
7.1	0.43	0.42	5.5	0.07	29	129	0.9973	3.42	0.72	10.5	5
7.1	0.43	0.42	5.5	0.071	28	128	0.9973	3.42	0.71	10.5	5
7.1	0.68	0	2.2	0.073	12	22	0.9969	3.48	0.5	9.3	5
6.8	0.6	0.18	1.9	0.079	18	86	0.9968	3.59	0.57	9.3	6
7.6	0.95	0.03	2	0.09	7	20	0.9959	3.2	0.56	9.6	5
7.6	0.68	0.02	1.3	0.072	9	20	0.9965	3.17	1.08	9.2	4
7.8	0.53	0.04	1.7	0.076	17	31	0.9964	3.33	0.56	10	6
7.4	0.6	0.26	7.3	0.07	36	121	0.9982	3.37	0.49	9.4	5
7.3	0.59	0.26	7.2	0.07	35	121	0.9981	3.37	0.49	9.4	5
7.8	0.63	0.48	1.7	0.1	14	96	0.9961	3.19	0.62	9.5	5
6.8	0.64	0.1	2.1	0.085	18	101	0.9956	3.34	0.52	10.2	5
7.3	0.55	0.03	1.6	0.072	17	42	0.9956	3.37	0.48	9	4
6.8	0.63	0.07	2.1	0.089	11	44	0.9953	3.47	0.55	10.4	6
7.5	0.705	0.24	1.8	0.36	15	63	0.9964	3	1.59	9.5	5
7.9	0.885	0.03	1.8	0.058	4	8	0.9972	3.36	0.33	9.1	4
8	0.42	0.17	2	0.073	6	18	0.9972	3.29	0.61	9.2	6
8	0.42	0.17	2	0.073	6	18	0.9972	3.29	0.61	9.2	6
7.4	0.62	0.05	1.9	0.068	24	42	0.9961	3.42	0.57	11.5	6
7.3	0.38	0.21	2	0.08	7	35	0.9961	3.33	0.47	9.5	5
6.9	0.5	0.04	1.5	0.085	19	49	0.9958	3.35	0.78	9.5	5
7.3	0.38	0.21	2	0.08	7	35	0.9961	3.33	0.47	9.5	5
7.5	0.52	0.42	2.3	0.087	8	38	0.9972	3.58	0.61	10.5	6
7	0.805	0	2.5	0.068	7	20	0.9969	3.48	0.56	9.6	5
8.8	0.61	0.14	2.4	0.067	10	42	0.9969	3.19	0.59	9.5	5
8.8	0.61	0.14	2.4	0.067	10	42	0.9969	3.19	0.59	9.5	5
8.9	0.61	0.49	2	0.27	23	110	0.9972	3.12	1.02	9.3	5
7.2	0.73	0.02	2.5	0.076	16	42	0.9972	3.44	0.52	9.3	5
6.8	0.61	0.2	1.8	0.077	11	65	0.9971	3.54	0.58	9.3	5
6.7	0.62	0.21	1.9	0.079	8	62	0.997	3.52	0.58	9.3	6
8.9	0.31	0.57	2	0.111	26	85	0.9971	3.26	0.53	9.7	5
7.4	0.39	0.48	2	0.082	14	67	0.9972	3.34	0.55	9.2	5
7.7	0.705	0.1	2.6	0.084	9	26	0.9976	3.39	0.49	9.7	5
7.9	0.5	0.33	2	0.084	15	143	0.9968	3.2	0.55	9.5	5
7.9	0.49	0.32	1.9	0.082	17	144	0.9968	3.2	0.55	9.5	5
8.2	0.5	0.35	2.9	0.077	21	127	0.9976	3.23	0.62	9.4	5
6.4	0.37	0.25	1.9	0.074	21	49	0.9974	3.57	0.62	9.8	6
6.8	0.63	0.12	3.8	0.099	16	126	0.9969	3.28	0.61	9.5	5
7.6	0.55	0.21	2.2	0.071	7	28	0.9964	3.28	0.55	9.7	5
7.6	0.55	0.21	2.2	0.071	7	28	0.9964	3.28	0.55	9.7	5
7.8	0.59	0.33	2	0.074	24	120	0.9968	3.25	0.54	9.4	5
7.3	0.58	0.3	2.4	0.074	15	55	0.9968	3.46	0.59	10.2	5
11.5	0.3	0.6	2	0.067	12	27	0.9981	3.11	0.97	10.1	6
5.4	0.835	0.08	1.2	0.046	13	93	0.9924	3.57	0.85	13	7
6.9	1.09	0.06	2.1	0.061	12	31	0.9948	3.51	0.43	11.4	4
9.6	0.32	0.47	1.4	0.056	9	24	0.99695	3.22	0.82	10.3	7
8.8	0.37	0.48	2.1	0.097	39	145	0.9975	3.04	1.03	9.3	5
6.8	0.5	0.11	1.5	0.075	16	49	0.99545	3.36	0.79	9.5	5
7	0.42	0.35	1.6	0.088	16	39	0.9961	3.34	0.55	9.2	5
7	0.43	0.36	1.6	0.089	14	37	0.99615	3.34	0.56	9.2	6
12.8	0.3	0.74	2.6	0.095	9	28	0.9994	3.2	0.77	10.8	7
12.8	0.3	0.74	2.6	0.095	9	28	0.9994	3.2	0.77	10.8	7
7.8	0.57	0.31	1.8	0.069	26	120	0.99625	3.29	0.53	9.3	5
7.8	0.44	0.28	2.7	0.1	18	95	0.9966	3.22	0.67	9.4	5
11	0.3	0.58	2.1	0.054	7	19	0.998	3.31	0.88	10.5	7
9.7	0.53	0.6	2	0.039	5	19	0.99585	3.3	0.86	12.4	6
8	0.725	0.24	2.8	0.083	10	62	0.99685	3.35	0.56	10	6
11.6	0.44	0.64	2.1	0.059	5	15	0.998	3.21	0.67	10.2	6
8.2	0.57	0.26	2.2	0.06	28	65	0.9959	3.3	0.43	10.1	5
7.8	0.735	0.08	2.4	0.092	10	41	0.9974	3.24	0.71	9.8	6
7	0.49	0.49	5.6	0.06	26	121	0.9974	3.34	0.76	10.5	5
8.7	0.625	0.16	2	0.101	13	49	0.9962	3.14	0.57	11	5
8.1	0.725	0.22	2.2	0.072	11	41	0.9967	3.36	0.55	9.1	5
7.5	0.49	0.19	1.9	0.076	10	44	0.9957	3.39	0.54	9.7	5
7.8	0.53	0.33	2.4	0.08	24	144	0.99655	3.3	0.6	9.5	5
7.8	0.34	0.37	2	0.082	24	58	0.9964	3.34	0.59	9.4	6
7.4	0.53	0.26	2	0.101	16	72	0.9957	3.15	0.57	9.4	5
6.8	0.61	0.04	1.5	0.057	5	10	0.99525	3.42	0.6	9.5	5
8.6	0.645	0.25	2	0.083	8	28	0.99815	3.28	0.6	10	6
8.4	0.635	0.36	2	0.089	15	55	0.99745	3.31	0.57	10.4	4
7.7	0.43	0.25	2.6	0.073	29	63	0.99615	3.37	0.58	10.5	6
8.9	0.59	0.5	2	0.337	27	81	0.9964	3.04	1.61	9.5	6
9	0.82	0.14	2.6	0.089	9	23	0.9984	3.39	0.63	9.8	5
7.7	0.43	0.25	2.6	0.073	29	63	0.99615	3.37	0.58	10.5	6
6.9	0.52	0.25	2.6	0.081	10	37	0.99685	3.46	0.5	11	5
5.2	0.48	0.04	1.6	0.054	19	106	0.9927	3.54	0.62	12.2	7
8	0.38	0.06	1.8	0.078	12	49	0.99625	3.37	0.52	9.9	6
8.5	0.37	0.2	2.8	0.09	18	58	0.998	3.34	0.7	9.6	6
6.9	0.52	0.25	2.6	0.081	10	37	0.99685	3.46	0.5	11	5
8.2	1	0.09	2.3	0.065	7	37	0.99685	3.32	0.55	9	6
7.2	0.63	0	1.9	0.097	14	38	0.99675	3.37	0.58	9	6
7.2	0.63	0	1.9	0.097	14	38	0.99675	3.37	0.58	9	6
7.2	0.645	0	1.9	0.097	15	39	0.99675	3.37	0.58	9.2	6
7.2	0.63	0	1.9	0.097	14	38	0.99675	3.37	0.58	9	6
8.2	1	0.09	2.3	0.065	7	37	0.99685	3.32	0.55	9	6
8.9	0.635	0.37	1.7	0.263	5	62	0.9971	3	1.09	9.3	5
12	0.38	0.56	2.1	0.093	6	24	0.99925	3.14	0.71	10.9	6
7.7	0.58	0.1	1.8	0.102	28	109	0.99565	3.08	0.49	9.8	6
15	0.21	0.44	2.2	0.075	10	24	1.00005	3.07	0.84	9.2	7
15	0.21	0.44	2.2	0.075	10	24	1.00005	3.07	0.84	9.2	7
7.3	0.66	0	2	0.084	6	23	0.9983	3.61	0.96	9.9	6
7.1	0.68	0.07	1.9	0.075	16	51	0.99685	3.38	0.52	9.5	5
8.2	0.6	0.17	2.3	0.072	11	73	0.9963	3.2	0.45	9.3	5
7.7	0.53	0.06	1.7	0.074	9	39	0.99615	3.35	0.48	9.8	6
7.3	0.66	0	2	0.084	6	23	0.9983	3.61	0.96	9.9	6
10.8	0.32	0.44	1.6	0.063	16	37	0.9985	3.22	0.78	10	6
7.1	0.6	0	1.8	0.074	16	34	0.9972	3.47	0.7	9.9	6
11.1	0.35	0.48	3.1	0.09	5	21	0.9986	3.17	0.53	10.5	5
7.7	0.775	0.42	1.9	0.092	8	86	0.9959	3.23	0.59	9.5	5
7.1	0.6	0	1.8	0.074	16	34	0.9972	3.47	0.7	9.9	6
8	0.57	0.23	3.2	0.073	17	119	0.99675	3.26	0.57	9.3	5
9.4	0.34	0.37	2.2	0.075	5	13	0.998	3.22	0.62	9.2	5
6.6	0.695	0	2.1	0.075	12	56	0.9968	3.49	0.67	9.2	5
7.7	0.41	0.76	1.8	0.611	8	45	0.9968	3.06	1.26	9.4	5
10	0.31	0.47	2.6	0.085	14	33	0.99965	3.36	0.8	10.5	7
7.9	0.33	0.23	1.7	0.077	18	45	0.99625	3.29	0.65	9.3	5
7	0.975	0.04	2	0.087	12	67	0.99565	3.35	0.6	9.4	4
8	0.52	0.03	1.7	0.07	10	35	0.99575	3.34	0.57	10	5
7.9	0.37	0.23	1.8	0.077	23	49	0.9963	3.28	0.67	9.3	5
12.5	0.56	0.49	2.4	0.064	5	27	0.9999	3.08	0.87	10.9	5
11.8	0.26	0.52	1.8	0.071	6	10	0.9968	3.2	0.72	10.2	7
8.1	0.87	0	3.3	0.096	26	61	1.00025	3.6	0.72	9.8	4
7.9	0.35	0.46	3.6	0.078	15	37	0.9973	3.35	0.86	12.8	8
6.9	0.54	0.04	3	0.077	7	27	0.9987	3.69	0.91	9.4	6
11.5	0.18	0.51	4	0.104	4	23	0.9996	3.28	0.97	10.1	6
7.9	0.545	0.06	4	0.087	27	61	0.9965	3.36	0.67	10.7	6
11.5	0.18	0.51	4	0.104	4	23	0.9996	3.28	0.97	10.1	6
10.9	0.37	0.58	4	0.071	17	65	0.99935	3.22	0.78	10.1	5
8.4	0.715	0.2	2.4	0.076	10	38	0.99735	3.31	0.64	9.4	5
7.5	0.65	0.18	7	0.088	27	94	0.99915	3.38	0.77	9.4	5
7.9	0.545	0.06	4	0.087	27	61	0.9965	3.36	0.67	10.7	6
6.9	0.54	0.04	3	0.077	7	27	0.9987	3.69	0.91	9.4	6
11.5	0.18	0.51	4	0.104	4	23	0.9996	3.28	0.97	10.1	6
10.3	0.32	0.45	6.4	0.073	5	13	0.9976	3.23	0.82	12.6	8
8.9	0.4	0.32	5.6	0.087	10	47	0.9991	3.38	0.77	10.5	7
11.4	0.26	0.44	3.6	0.071	6	19	0.9986	3.12	0.82	9.3	6
7.7	0.27	0.68	3.5	0.358	5	10	0.9972	3.25	1.08	9.9	7
7.6	0.52	0.12	3	0.067	12	53	0.9971	3.36	0.57	9.1	5
8.9	0.4	0.32	5.6	0.087	10	47	0.9991	3.38	0.77	10.5	7
9.9	0.59	0.07	3.4	0.102	32	71	1.00015	3.31	0.71	9.8	5
9.9	0.59	0.07	3.4	0.102	32	71	1.00015	3.31	0.71	9.8	5
12	0.45	0.55	2	0.073	25	49	0.9997	3.1	0.76	10.3	6
7.5	0.4	0.12	3	0.092	29	53	0.9967	3.37	0.7	10.3	6
8.7	0.52	0.09	2.5	0.091	20	49	0.9976	3.34	0.86	10.6	7
11.6	0.42	0.53	3.3	0.105	33	98	1.001	3.2	0.95	9.2	5
8.7	0.52	0.09	2.5	0.091	20	49	0.9976	3.34	0.86	10.6	7
11	0.2	0.48	2	0.343	6	18	0.9979	3.3	0.71	10.5	5
10.4	0.55	0.23	2.7	0.091	18	48	0.9994	3.22	0.64	10.3	6
6.9	0.36	0.25	2.4	0.098	5	16	0.9964	3.41	0.6	10.1	6
13.3	0.34	0.52	3.2	0.094	17	53	1.0014	3.05	0.81	9.5	6
10.8	0.5	0.46	2.5	0.073	5	27	1.0001	3.05	0.64	9.5	5
10.6	0.83	0.37	2.6	0.086	26	70	0.9981	3.16	0.52	9.9	5
7.1	0.63	0.06	2	0.083	8	29	0.99855	3.67	0.73	9.6	5
7.2	0.65	0.02	2.3	0.094	5	31	0.9993	3.67	0.8	9.7	5
6.9	0.67	0.06	2.1	0.08	8	33	0.99845	3.68	0.71	9.6	5
7.5	0.53	0.06	2.6	0.086	20	44	0.9965	3.38	0.59	10.7	6
11.1	0.18	0.48	1.5	0.068	7	15	0.9973	3.22	0.64	10.1	6
8.3	0.705	0.12	2.6	0.092	12	28	0.9994	3.51	0.72	10	5
7.4	0.67	0.12	1.6	0.186	5	21	0.996	3.39	0.54	9.5	5
8.4	0.65	0.6	2.1	0.112	12	90	0.9973	3.2	0.52	9.2	5
10.3	0.53	0.48	2.5	0.063	6	25	0.9998	3.12	0.59	9.3	6
7.6	0.62	0.32	2.2	0.082	7	54	0.9966	3.36	0.52	9.4	5
10.3	0.41	0.42	2.4	0.213	6	14	0.9994	3.19	0.62	9.5	6
10.3	0.43	0.44	2.4	0.214	5	12	0.9994	3.19	0.63	9.5	6
7.4	0.29	0.38	1.7	0.062	9	30	0.9968	3.41	0.53	9.5	6
10.3	0.53	0.48	2.5	0.063	6	25	0.9998	3.12	0.59	9.3	6
7.9	0.53	0.24	2	0.072	15	105	0.996	3.27	0.54	9.4	6
9	0.46	0.31	2.8	0.093	19	98	0.99815	3.32	0.63	9.5	6
8.6	0.47	0.3	3	0.076	30	135	0.9976	3.3	0.53	9.4	5
7.4	0.36	0.29	2.6	0.087	26	72	0.99645	3.39	0.68	11	5
7.1	0.35	0.29	2.5	0.096	20	53	0.9962	3.42	0.65	11	6
9.6	0.56	0.23	3.4	0.102	37	92	0.9996	3.3	0.65	10.1	5
9.6	0.77	0.12	2.9	0.082	30	74	0.99865	3.3	0.64	10.4	6
9.8	0.66	0.39	3.2	0.083	21	59	0.9989	3.37	0.71	11.5	7
9.6	0.77	0.12	2.9	0.082	30	74	0.99865	3.3	0.64	10.4	6
9.8	0.66	0.39	3.2	0.083	21	59	0.9989	3.37	0.71	11.5	7
9.3	0.61	0.26	3.4	0.09	25	87	0.99975	3.24	0.62	9.7	5
7.8	0.62	0.05	2.3	0.079	6	18	0.99735	3.29	0.63	9.3	5
10.3	0.59	0.42	2.8	0.09	35	73	0.999	3.28	0.7	9.5	6
10	0.49	0.2	11	0.071	13	50	1.0015	3.16	0.69	9.2	6
10	0.49	0.2	11	0.071	13	50	1.0015	3.16	0.69	9.2	6
11.6	0.53	0.66	3.65	0.121	6	14	0.9978	3.05	0.74	11.5	7
10.3	0.44	0.5	4.5	0.107	5	13	0.998	3.28	0.83	11.5	5
13.4	0.27	0.62	2.6	0.082	6	21	1.0002	3.16	0.67	9.7	6
10.7	0.46	0.39	2	0.061	7	15	0.9981	3.18	0.62	9.5	5
10.2	0.36	0.64	2.9	0.122	10	41	0.998	3.23	0.66	12.5	6
10.2	0.36	0.64	2.9	0.122	10	41	0.998	3.23	0.66	12.5	6
8	0.58	0.28	3.2	0.066	21	114	0.9973	3.22	0.54	9.4	6
8.4	0.56	0.08	2.1	0.105	16	44	0.9958	3.13	0.52	11	5
7.9	0.65	0.01	2.5	0.078	17	38	0.9963	3.34	0.74	11.7	7
11.9	0.695	0.53	3.4	0.128	7	21	0.9992	3.17	0.84	12.2	7
8.9	0.43	0.45	1.9	0.052	6	16	0.9948	3.35	0.7	12.5	6
7.8	0.43	0.32	2.8	0.08	29	58	0.9974	3.31	0.64	10.3	5
12.4	0.49	0.58	3	0.103	28	99	1.0008	3.16	1	11.5	6
12.5	0.28	0.54	2.3	0.082	12	29	0.9997	3.11	1.36	9.8	7
12.2	0.34	0.5	2.4	0.066	10	21	1	3.12	1.18	9.2	6
10.6	0.42	0.48	2.7	0.065	5	18	0.9972	3.21	0.87	11.3	6
10.9	0.39	0.47	1.8	0.118	6	14	0.9982	3.3	0.75	9.8	6
10.9	0.39	0.47	1.8	0.118	6	14	0.9982	3.3	0.75	9.8	6
11.9	0.57	0.5	2.6	0.082	6	32	1.0006	3.12	0.78	10.7	6
7	0.685	0	1.9	0.067	40	63	0.9979	3.6	0.81	9.9	5
6.6	0.815	0.02	2.7	0.072	17	34	0.9955	3.58	0.89	12.3	7
13.8	0.49	0.67	3	0.093	6	15	0.9986	3.02	0.93	12	6
9.6	0.56	0.31	2.8	0.089	15	46	0.9979	3.11	0.92	10	6
9.1	0.785	0	2.6	0.093	11	28	0.9994	3.36	0.86	9.4	6
10.7	0.67	0.22	2.7	0.107	17	34	1.0004	3.28	0.98	9.9	6
9.1	0.795	0	2.6	0.096	11	26	0.9994	3.35	0.83	9.4	6
7.7	0.665	0	2.4	0.09	8	19	0.9974	3.27	0.73	9.3	5
13.5	0.53	0.79	4.8	0.12	23	77	1.0018	3.18	0.77	13	5
6.1	0.21	0.4	1.4	0.066	40.5	165	0.9912	3.25	0.59	11.9	6
6.7	0.75	0.01	2.4	0.078	17	32	0.9955	3.55	0.61	12.8	6
11.5	0.41	0.52	3	0.08	29	55	1.0001	3.26	0.88	11	5
10.5	0.42	0.66	2.95	0.116	12	29	0.997	3.24	0.75	11.7	7
11.9	0.43	0.66	3.1	0.109	10	23	1	3.15	0.85	10.4	7
12.6	0.38	0.66	2.6	0.088	10	41	1.001	3.17	0.68	9.8	6
8.2	0.7	0.23	2	0.099	14	81	0.9973	3.19	0.7	9.4	5
8.6	0.45	0.31	2.6	0.086	21	50	0.9982	3.37	0.91	9.9	6
11.9	0.58	0.66	2.5	0.072	6	37	0.9992	3.05	0.56	10	5
12.5	0.46	0.63	2	0.071	6	15	0.9988	2.99	0.87	10.2	5
12.8	0.615	0.66	5.8	0.083	7	42	1.0022	3.07	0.73	10	7
10	0.42	0.5	3.4	0.107	7	21	0.9979	3.26	0.93	11.8	6
12.8	0.615	0.66	5.8	0.083	7	42	1.0022	3.07	0.73	10	7
10.4	0.575	0.61	2.6	0.076	11	24	1	3.16	0.69	9	5
10.3	0.34	0.52	2.8	0.159	15	75	0.9998	3.18	0.64	9.4	5
9.4	0.27	0.53	2.4	0.074	6	18	0.9962	3.2	1.13	12	7
6.9	0.765	0.02	2.3	0.063	35	63	0.9975	3.57	0.78	9.9	5
7.9	0.24	0.4	1.6	0.056	11	25	0.9967	3.32	0.87	8.7	6
9.1	0.28	0.48	1.8	0.067	26	46	0.9967	3.32	1.04	10.6	6
7.4	0.55	0.22	2.2	0.106	12	72	0.9959	3.05	0.63	9.2	5
14	0.41	0.63	3.8	0.089	6	47	1.0014	3.01	0.81	10.8	6
11.5	0.54	0.71	4.4	0.124	6	15	0.9984	3.01	0.83	11.8	7
11.5	0.45	0.5	3	0.078	19	47	1.0003	3.26	1.11	11	6
9.4	0.27	0.53	2.4	0.074	6	18	0.9962	3.2	1.13	12	7
11.4	0.625	0.66	6.2	0.088	6	24	0.9988	3.11	0.99	13.3	6
8.3	0.42	0.38	2.5	0.094	24	60	0.9979	3.31	0.7	10.8	6
8.3	0.26	0.42	2	0.08	11	27	0.9974	3.21	0.8	9.4	6
13.7	0.415	0.68	2.9	0.085	17	43	1.0014	3.06	0.8	10	6
8.3	0.26	0.42	2	0.08	11	27	0.9974	3.21	0.8	9.4	6
8.3	0.26	0.42	2	0.08	11	27	0.9974	3.21	0.8	9.4	6
7.7	0.51	0.28	2.1	0.087	23	54	0.998	3.42	0.74	9.2	5
7.4	0.63	0.07	2.4	0.09	11	37	0.9979	3.43	0.76	9.7	6
7.8	0.54	0.26	2	0.088	23	48	0.9981	3.41	0.74	9.2	6
8.3	0.66	0.15	1.9	0.079	17	42	0.9972	3.31	0.54	9.6	6
7.8	0.46	0.26	1.9	0.088	23	53	0.9981	3.43	0.74	9.2	6
9.6	0.38	0.31	2.5	0.096	16	49	0.9982	3.19	0.7	10	7
5.6	0.85	0.05	1.4	0.045	12	88	0.9924	3.56	0.82	12.9	8
13.7	0.415	0.68	2.9	0.085	17	43	1.0014	3.06	0.8	10	6
9.5	0.37	0.52	2	0.082	6	26	0.998	3.18	0.51	9.5	5
8.4	0.665	0.61	2	0.112	13	95	0.997	3.16	0.54	9.1	5
12.7	0.6	0.65	2.3	0.063	6	25	0.9997	3.03	0.57	9.9	5
12	0.37	0.76	4.2	0.066	7	38	1.0004	3.22	0.6	13	7
6.6	0.735	0.02	7.9	0.122	68	124	0.9994	3.47	0.53	9.9	5
11.5	0.59	0.59	2.6	0.087	13	49	0.9988	3.18	0.65	11	6
11.5	0.59	0.59	2.6	0.087	13	49	0.9988	3.18	0.65	11	6
8.7	0.765	0.22	2.3	0.064	9	42	0.9963	3.1	0.55	9.4	5
6.6	0.735	0.02	7.9	0.122	68	124	0.9994	3.47	0.53	9.9	5
7.7	0.26	0.3	1.7	0.059	20	38	0.9949	3.29	0.47	10.8	6
12.2	0.48	0.54	2.6	0.085	19	64	1	3.1	0.61	10.5	6
11.4	0.6	0.49	2.7	0.085	10	41	0.9994	3.15	0.63	10.5	6
7.7	0.69	0.05	2.7	0.075	15	27	0.9974	3.26	0.61	9.1	5
8.7	0.31	0.46	1.4	0.059	11	25	0.9966	3.36	0.76	10.1	6
9.8	0.44	0.47	2.5	0.063	9	28	0.9981	3.24	0.65	10.8	6
12	0.39	0.66	3	0.093	12	30	0.9996	3.18	0.63	10.8	7
10.4	0.34	0.58	3.7	0.174	6	16	0.997	3.19	0.7	11.3	6
12.5	0.46	0.49	4.5	0.07	26	49	0.9981	3.05	0.57	9.6	4
9	0.43	0.34	2.5	0.08	26	86	0.9987	3.38	0.62	9.5	6
9.1	0.45	0.35	2.4	0.08	23	78	0.9987	3.38	0.62	9.5	5
7.1	0.735	0.16	1.9	0.1	15	77	0.9966	3.27	0.64	9.3	5
9.9	0.4	0.53	6.7	0.097	6	19	0.9986	3.27	0.82	11.7	7
8.8	0.52	0.34	2.7	0.087	24	122	0.9982	3.26	0.61	9.5	5
8.6	0.725	0.24	6.6	0.117	31	134	1.0014	3.32	1.07	9.3	5
10.6	0.48	0.64	2.2	0.111	6	20	0.997	3.26	0.66	11.7	6
7	0.58	0.12	1.9	0.091	34	124	0.9956	3.44	0.48	10.5	5
11.9	0.38	0.51	2	0.121	7	20	0.9996	3.24	0.76	10.4	6
6.8	0.77	0	1.8	0.066	34	52	0.9976	3.62	0.68	9.9	5
9.5	0.56	0.33	2.4	0.089	35	67	0.9972	3.28	0.73	11.8	7
6.6	0.84	0.03	2.3	0.059	32	48	0.9952	3.52	0.56	12.3	7
7.7	0.96	0.2	2	0.047	15	60	0.9955	3.36	0.44	10.9	5
10.5	0.24	0.47	2.1	0.066	6	24	0.9978	3.15	0.9	11	7
7.7	0.96	0.2	2	0.047	15	60	0.9955	3.36	0.44	10.9	5
6.6	0.84	0.03	2.3	0.059	32	48	0.9952	3.52	0.56	12.3	7
6.4	0.67	0.08	2.1	0.045	19	48	0.9949	3.49	0.49	11.4	6
9.5	0.78	0.22	1.9	0.077	6	32	0.9988	3.26	0.56	10.6	6
9.1	0.52	0.33	1.3	0.07	9	30	0.9978	3.24	0.6	9.3	5
12.8	0.84	0.63	2.4	0.088	13	35	0.9997	3.1	0.6	10.4	6
10.5	0.24	0.47	2.1	0.066	6	24	0.9978	3.15	0.9	11	7
7.8	0.55	0.35	2.2	0.074	21	66	0.9974	3.25	0.56	9.2	5
11.9	0.37	0.69	2.3	0.078	12	24	0.9958	3	0.65	12.8	6
12.3	0.39	0.63	2.3	0.091	6	18	1.0004	3.16	0.49	9.5	5
10.4	0.41	0.55	3.2	0.076	22	54	0.9996	3.15	0.89	9.9	6
12.3	0.39	0.63	2.3	0.091	6	18	1.0004	3.16	0.49	9.5	5
8	0.67	0.3	2	0.06	38	62	0.9958	3.26	0.56	10.2	6
11.1	0.45	0.73	3.2	0.066	6	22	0.9986	3.17	0.66	11.2	6
10.4	0.41	0.55	3.2	0.076	22	54	0.9996	3.15	0.89	9.9	6
7	0.62	0.18	1.5	0.062	7	50	0.9951	3.08	0.6	9.3	5
12.6	0.31	0.72	2.2	0.072	6	29	0.9987	2.88	0.82	9.8	8
11.9	0.4	0.65	2.15	0.068	7	27	0.9988	3.06	0.68	11.3	6
15.6	0.685	0.76	3.7	0.1	6	43	1.0032	2.95	0.68	11.2	7
10	0.44	0.49	2.7	0.077	11	19	0.9963	3.23	0.63	11.6	7
5.3	0.57	0.01	1.7	0.054	5	27	0.9934	3.57	0.84	12.5	7
9.5	0.735	0.1	2.1	0.079	6	31	0.9986	3.23	0.56	10.1	6
12.5	0.38	0.6	2.6	0.081	31	72	0.9996	3.1	0.73	10.5	5
9.3	0.48	0.29	2.1	0.127	6	16	0.9968	3.22	0.72	11.2	5
8.6	0.53	0.22	2	0.1	7	27	0.9967	3.2	0.56	10.2	6
11.9	0.39	0.69	2.8	0.095	17	35	0.9994	3.1	0.61	10.8	6
11.9	0.39	0.69	2.8	0.095	17	35	0.9994	3.1	0.61	10.8	6
8.4	0.37	0.53	1.8	0.413	9	26	0.9979	3.06	1.06	9.1	6
6.8	0.56	0.03	1.7	0.084	18	35	0.9968	3.44	0.63	10	6
10.4	0.33	0.63	2.8	0.084	5	22	0.9998	3.26	0.74	11.2	7
7	0.23	0.4	1.6	0.063	21	67	0.9952	3.5	0.63	11.1	5
11.3	0.62	0.67	5.2	0.086	6	19	0.9988	3.22	0.69	13.4	8
8.9	0.59	0.39	2.3	0.095	5	22	0.9986	3.37	0.58	10.3	5
9.2	0.63	0.21	2.7	0.097	29	65	0.9988	3.28	0.58	9.6	5
10.4	0.33	0.63	2.8	0.084	5	22	0.9998	3.26	0.74	11.2	7
11.6	0.58	0.66	2.2	0.074	10	47	1.0008	3.25	0.57	9	3
9.2	0.43	0.52	2.3	0.083	14	23	0.9976	3.35	0.61	11.3	6
8.3	0.615	0.22	2.6	0.087	6	19	0.9982	3.26	0.61	9.3	5
11	0.26	0.68	2.55	0.085	10	25	0.997	3.18	0.61	11.8	5
8.1	0.66	0.7	2.2	0.098	25	129	0.9972	3.08	0.53	9	5
11.5	0.315	0.54	2.1	0.084	5	15	0.9987	2.98	0.7	9.2	6
10	0.29	0.4	2.9	0.098	10	26	1.0006	3.48	0.91	9.7	5
10.3	0.5	0.42	2	0.069	21	51	0.9982	3.16	0.72	11.5	6
8.8	0.46	0.45	2.6	0.065	7	18	0.9947	3.32	0.79	14	6
11.4	0.36	0.69	2.1	0.09	6	21	1	3.17	0.62	9.2	6
8.7	0.82	0.02	1.2	0.07	36	48	0.9952	3.2	0.58	9.8	5
13	0.32	0.65	2.6	0.093	15	47	0.9996	3.05	0.61	10.6	5
9.6	0.54	0.42	2.4	0.081	25	52	0.997	3.2	0.71	11.4	6
12.5	0.37	0.55	2.6	0.083	25	68	0.9995	3.15	0.82	10.4	6
9.9	0.35	0.55	2.1	0.062	5	14	0.9971	3.26	0.79	10.6	5
10.5	0.28	0.51	1.7	0.08	10	24	0.9982	3.2	0.89	9.4	6
9.6	0.68	0.24	2.2	0.087	5	28	0.9988	3.14	0.6	10.2	5
9.3	0.27	0.41	2	0.091	6	16	0.998	3.28	0.7	9.7	5
10.4	0.24	0.49	1.8	0.075	6	20	0.9977	3.18	1.06	11	6
9.6	0.68	0.24	2.2	0.087	5	28	0.9988	3.14	0.6	10.2	5
9.4	0.685	0.11	2.7	0.077	6	31	0.9984	3.19	0.7	10.1	6
10.6	0.28	0.39	15.5	0.069	6	23	1.0026	3.12	0.66	9.2	5
9.4	0.3	0.56	2.8	0.08	6	17	0.9964	3.15	0.92	11.7	8
10.6	0.36	0.59	2.2	0.152	6	18	0.9986	3.04	1.05	9.4	5
10.6	0.36	0.6	2.2	0.152	7	18	0.9986	3.04	1.06	9.4	5
10.6	0.44	0.68	4.1	0.114	6	24	0.997	3.06	0.66	13.4	6
10.2	0.67	0.39	1.9	0.054	6	17	0.9976	3.17	0.47	10	5
10.2	0.67	0.39	1.9	0.054	6	17	0.9976	3.17	0.47	10	5
10.2	0.645	0.36	1.8	0.053	5	14	0.9982	3.17	0.42	10	6
11.6	0.32	0.55	2.8	0.081	35	67	1.0002	3.32	0.92	10.8	7
9.3	0.39	0.4	2.6	0.073	10	26	0.9984	3.34	0.75	10.2	6
9.3	0.775	0.27	2.8	0.078	24	56	0.9984	3.31	0.67	10.6	6
9.2	0.41	0.5	2.5	0.055	12	25	0.9952	3.34	0.79	13.3	7
8.9	0.4	0.51	2.6	0.052	13	27	0.995	3.32	0.9	13.4	7
8.7	0.69	0.31	3	0.086	23	81	1.0002	3.48	0.74	11.6	6
6.5	0.39	0.23	8.3	0.051	28	91	0.9952	3.44	0.55	12.1	6
10.7	0.35	0.53	2.6	0.07	5	16	0.9972	3.15	0.65	11	8
7.8	0.52	0.25	1.9	0.081	14	38	0.9984	3.43	0.65	9	6
7.2	0.34	0.32	2.5	0.09	43	113	0.9966	3.32	0.79	11.1	5
10.7	0.35	0.53	2.6	0.07	5	16	0.9972	3.15	0.65	11	8
8.7	0.69	0.31	3	0.086	23	81	1.0002	3.48	0.74	11.6	6
7.8	0.52	0.25	1.9	0.081	14	38	0.9984	3.43	0.65	9	6
10.4	0.44	0.73	6.55	0.074	38	76	0.999	3.17	0.85	12	7
10.4	0.44	0.73	6.55	0.074	38	76	0.999	3.17	0.85	12	7
10.5	0.26	0.47	1.9	0.078	6	24	0.9976	3.18	1.04	10.9	7
10.5	0.24	0.42	1.8	0.077	6	22	0.9976	3.21	1.05	10.8	7
10.2	0.49	0.63	2.9	0.072	10	26	0.9968	3.16	0.78	12.5	7
10.4	0.24	0.46	1.8	0.075	6	21	0.9976	3.25	1.02	10.8	7
11.2	0.67	0.55	2.3	0.084	6	13	1	3.17	0.71	9.5	6
10	0.59	0.31	2.2	0.09	26	62	0.9994	3.18	0.63	10.2	6
13.3	0.29	0.75	2.8	0.084	23	43	0.9986	3.04	0.68	11.4	7
12.4	0.42	0.49	4.6	0.073	19	43	0.9978	3.02	0.61	9.5	5
10	0.59	0.31	2.2	0.09	26	62	0.9994	3.18	0.63	10.2	6
10.7	0.4	0.48	2.1	0.125	15	49	0.998	3.03	0.81	9.7	6
10.5	0.51	0.64	2.4	0.107	6	15	0.9973	3.09	0.66	11.8	7
10.5	0.51	0.64	2.4	0.107	6	15	0.9973	3.09	0.66	11.8	7
8.5	0.655	0.49	6.1	0.122	34	151	1.001	3.31	1.14	9.3	5
12.5	0.6	0.49	4.3	0.1	5	14	1.001	3.25	0.74	11.9	6
10.4	0.61	0.49	2.1	0.2	5	16	0.9994	3.16	0.63	8.4	3
10.9	0.21	0.49	2.8	0.088	11	32	0.9972	3.22	0.68	11.7	6
7.3	0.365	0.49	2.5	0.088	39	106	0.9966	3.36	0.78	11	5
9.8	0.25	0.49	2.7	0.088	15	33	0.9982	3.42	0.9	10	6
7.6	0.41	0.49	2	0.088	16	43	0.998	3.48	0.64	9.1	5
8.2	0.39	0.49	2.3	0.099	47	133	0.9979	3.38	0.99	9.8	5
9.3	0.4	0.49	2.5	0.085	38	142	0.9978	3.22	0.55	9.4	5
9.2	0.43	0.49	2.4	0.086	23	116	0.9976	3.23	0.64	9.5	5
10.4	0.64	0.24	2.8	0.105	29	53	0.9998	3.24	0.67	9.9	5
7.3	0.365	0.49	2.5	0.088	39	106	0.9966	3.36	0.78	11	5
7	0.38	0.49	2.5	0.097	33	85	0.9962	3.39	0.77	11.4	6
8.2	0.42	0.49	2.6	0.084	32	55	0.9988	3.34	0.75	8.7	6
9.9	0.63	0.24	2.4	0.077	6	33	0.9974	3.09	0.57	9.4	5
9.1	0.22	0.24	2.1	0.078	1	28	0.999	3.41	0.87	10.3	6
11.9	0.38	0.49	2.7	0.098	12	42	1.0004	3.16	0.61	10.3	5
11.9	0.38	0.49	2.7	0.098	12	42	1.0004	3.16	0.61	10.3	5
10.3	0.27	0.24	2.1	0.072	15	33	0.9956	3.22	0.66	12.8	6
10	0.48	0.24	2.7	0.102	13	32	1	3.28	0.56	10	6
9.1	0.22	0.24	2.1	0.078	1	28	0.999	3.41	0.87	10.3	6
9.9	0.63	0.24	2.4	0.077	6	33	0.9974	3.09	0.57	9.4	5
8.1	0.825	0.24	2.1	0.084	5	13	0.9972	3.37	0.77	10.7	6
12.9	0.35	0.49	5.8	0.066	5	35	1.0014	3.2	0.66	12	7
11.2	0.5	0.74	5.15	0.1	5	17	0.9996	3.22	0.62	11.2	5
9.2	0.59	0.24	3.3	0.101	20	47	0.9988	3.26	0.67	9.6	5
9.5	0.46	0.49	6.3	0.064	5	17	0.9988	3.21	0.73	11	6
9.3	0.715	0.24	2.1	0.07	5	20	0.9966	3.12	0.59	9.9	5
11.2	0.66	0.24	2.5	0.085	16	53	0.9993	3.06	0.72	11	6
14.3	0.31	0.74	1.8	0.075	6	15	1.0008	2.86	0.79	8.4	6
9.1	0.47	0.49	2.6	0.094	38	106	0.9982	3.08	0.59	9.1	5
7.5	0.55	0.24	2	0.078	10	28	0.9983	3.45	0.78	9.5	6
10.6	0.31	0.49	2.5	0.067	6	21	0.9987	3.26	0.86	10.7	6
12.4	0.35	0.49	2.6	0.079	27	69	0.9994	3.12	0.75	10.4	6
9	0.53	0.49	1.9	0.171	6	25	0.9975	3.27	0.61	9.4	6
6.8	0.51	0.01	2.1	0.074	9	25	0.9958	3.33	0.56	9.5	6
9.4	0.43	0.24	2.8	0.092	14	45	0.998	3.19	0.73	10	6
9.5	0.46	0.24	2.7	0.092	14	44	0.998	3.12	0.74	10	6
5	1.04	0.24	1.6	0.05	32	96	0.9934	3.74	0.62	11.5	5
15.5	0.645	0.49	4.2	0.095	10	23	1.00315	2.92	0.74	11.1	5
15.5	0.645	0.49	4.2	0.095	10	23	1.00315	2.92	0.74	11.1	5
10.9	0.53	0.49	4.6	0.118	10	17	1.0002	3.07	0.56	11.7	6
15.6	0.645	0.49	4.2	0.095	10	23	1.00315	2.92	0.74	11.1	5
10.9	0.53	0.49	4.6	0.118	10	17	1.0002	3.07	0.56	11.7	6
13	0.47	0.49	4.3	0.085	6	47	1.0021	3.3	0.68	12.7	6
12.7	0.6	0.49	2.8	0.075	5	19	0.9994	3.14	0.57	11.4	5
9	0.44	0.49	2.4	0.078	26	121	0.9978	3.23	0.58	9.2	5
9	0.54	0.49	2.9	0.094	41	110	0.9982	3.08	0.61	9.2	5
7.6	0.29	0.49	2.7	0.092	25	60	0.9971	3.31	0.61	10.1	6
13	0.47	0.49	4.3	0.085	6	47	1.0021	3.3	0.68	12.7	6
12.7	0.6	0.49	2.8	0.075	5	19	0.9994	3.14	0.57	11.4	5
8.7	0.7	0.24	2.5	0.226	5	15	0.9991	3.32	0.6	9	6
8.7	0.7	0.24	2.5	0.226	5	15	0.9991	3.32	0.6	9	6
9.8	0.5	0.49	2.6	0.25	5	20	0.999	3.31	0.79	10.7	6
6.2	0.36	0.24	2.2	0.095	19	42	0.9946	3.57	0.57	11.7	6
11.5	0.35	0.49	3.3	0.07	10	37	1.0003	3.32	0.91	11	6
6.2	0.36	0.24	2.2	0.095	19	42	0.9946	3.57	0.57	11.7	6
10.2	0.24	0.49	2.4	0.075	10	28	0.9978	3.14	0.61	10.4	5
10.5	0.59	0.49	2.1	0.07	14	47	0.9991	3.3	0.56	9.6	4
10.6	0.34	0.49	3.2	0.078	20	78	0.9992	3.19	0.7	10	6
12.3	0.27	0.49	3.1	0.079	28	46	0.9993	3.2	0.8	10.2	6
9.9	0.5	0.24	2.3	0.103	6	14	0.9978	3.34	0.52	10	4
8.8	0.44	0.49	2.8	0.083	18	111	0.9982	3.3	0.6	9.5	5
8.8	0.47	0.49	2.9	0.085	17	110	0.9982	3.29	0.6	9.8	5
10.6	0.31	0.49	2.2	0.063	18	40	0.9976	3.14	0.51	9.8	6
12.3	0.5	0.49	2.2	0.089	5	14	1.0002	3.19	0.44	9.6	5
12.3	0.5	0.49	2.2	0.089	5	14	1.0002	3.19	0.44	9.6	5
11.7	0.49	0.49	2.2	0.083	5	15	1	3.19	0.43	9.2	5
12	0.28	0.49	1.9	0.074	10	21	0.9976	2.98	0.66	9.9	7
11.8	0.33	0.49	3.4	0.093	54	80	1.0002	3.3	0.76	10.7	7
7.6	0.51	0.24	2.4	0.091	8	38	0.998	3.47	0.66	9.6	6
11.1	0.31	0.49	2.7	0.094	16	47	0.9986	3.12	1.02	10.6	7
7.3	0.73	0.24	1.9	0.108	18	102	0.9967	3.26	0.59	9.3	5
5	0.42	0.24	2	0.06	19	50	0.9917	3.72	0.74	14	8
10.2	0.29	0.49	2.6	0.059	5	13	0.9976	3.05	0.74	10.5	7
9	0.45	0.49	2.6	0.084	21	75	0.9987	3.35	0.57	9.7	5
6.6	0.39	0.49	1.7	0.07	23	149	0.9922	3.12	0.5	11.5	6
9	0.45	0.49	2.6	0.084	21	75	0.9987	3.35	0.57	9.7	5
9.9	0.49	0.58	3.5	0.094	9	43	1.0004	3.29	0.58	9	5
7.9	0.72	0.17	2.6	0.096	20	38	0.9978	3.4	0.53	9.5	5
8.9	0.595	0.41	7.9	0.086	30	109	0.9998	3.27	0.57	9.3	5
12.4	0.4	0.51	2	0.059	6	24	0.9994	3.04	0.6	9.3	6
11.9	0.58	0.58	1.9	0.071	5	18	0.998	3.09	0.63	10	6
8.5	0.585	0.18	2.1	0.078	5	30	0.9967	3.2	0.48	9.8	6
12.7	0.59	0.45	2.3	0.082	11	22	1	3	0.7	9.3	6
8.2	0.915	0.27	2.1	0.088	7	23	0.9962	3.26	0.47	10	4
13.2	0.46	0.52	2.2	0.071	12	35	1.0006	3.1	0.56	9	6
7.7	0.835	0	2.6	0.081	6	14	0.9975	3.3	0.52	9.3	5
13.2	0.46	0.52	2.2	0.071	12	35	1.0006	3.1	0.56	9	6
8.3	0.58	0.13	2.9	0.096	14	63	0.9984	3.17	0.62	9.1	6
8.3	0.6	0.13	2.6	0.085	6	24	0.9984	3.31	0.59	9.2	6
9.4	0.41	0.48	4.6	0.072	10	20	0.9973	3.34	0.79	12.2	7
8.8	0.48	0.41	3.3	0.092	26	52	0.9982	3.31	0.53	10.5	6
10.1	0.65	0.37	5.1	0.11	11	65	1.0026	3.32	0.64	10.4	6
6.3	0.36	0.19	3.2	0.075	15	39	0.9956	3.56	0.52	12.7	6
8.8	0.24	0.54	2.5	0.083	25	57	0.9983	3.39	0.54	9.2	5
13.2	0.38	0.55	2.7	0.081	5	16	1.0006	2.98	0.54	9.4	5
7.5	0.64	0	2.4	0.077	18	29	0.9965	3.32	0.6	10	6
8.2	0.39	0.38	1.5	0.058	10	29	0.9962	3.26	0.74	9.8	5
9.2	0.755	0.18	2.2	0.148	10	103	0.9969	2.87	1.36	10.2	6
9.6	0.6	0.5	2.3	0.079	28	71	0.9997	3.5	0.57	9.7	5
9.6	0.6	0.5	2.3	0.079	28	71	0.9997	3.5	0.57	9.7	5
11.5	0.31	0.51	2.2	0.079	14	28	0.9982	3.03	0.93	9.8	6
11.4	0.46	0.5	2.7	0.122	4	17	1.0006	3.13	0.7	10.2	5
11.3	0.37	0.41	2.3	0.088	6	16	0.9988	3.09	0.8	9.3	5
8.3	0.54	0.24	3.4	0.076	16	112	0.9976	3.27	0.61	9.4	5
8.2	0.56	0.23	3.4	0.078	14	104	0.9976	3.28	0.62	9.4	5
10	0.58	0.22	1.9	0.08	9	32	0.9974	3.13	0.55	9.5	5
7.9	0.51	0.25	2.9	0.077	21	45	0.9974	3.49	0.96	12.1	6
6.8	0.69	0	5.6	0.124	21	58	0.9997	3.46	0.72	10.2	5
6.8	0.69	0	5.6	0.124	21	58	0.9997	3.46	0.72	10.2	5
8.8	0.6	0.29	2.2	0.098	5	15	0.9988	3.36	0.49	9.1	5
8.8	0.6	0.29	2.2	0.098	5	15	0.9988	3.36	0.49	9.1	5
8.7	0.54	0.26	2.5	0.097	7	31	0.9976	3.27	0.6	9.3	6
7.6	0.685	0.23	2.3	0.111	20	84	0.9964	3.21	0.61	9.3	5
8.7	0.54	0.26	2.5	0.097	7	31	0.9976	3.27	0.6	9.3	6
10.4	0.28	0.54	2.7	0.105	5	19	0.9988	3.25	0.63	9.5	5
7.6	0.41	0.14	3	0.087	21	43	0.9964	3.32	0.57	10.5	6
10.1	0.935	0.22	3.4	0.105	11	86	1.001	3.43	0.64	11.3	4
7.9	0.35	0.21	1.9	0.073	46	102	0.9964	3.27	0.58	9.5	5
8.7	0.84	0	1.4	0.065	24	33	0.9954	3.27	0.55	9.7	5
9.6	0.88	0.28	2.4	0.086	30	147	0.9979	3.24	0.53	9.4	5
9.5	0.885	0.27	2.3	0.084	31	145	0.9978	3.24	0.53	9.4	5
7.7	0.915	0.12	2.2	0.143	7	23	0.9964	3.35	0.65	10.2	7
8.9	0.29	0.35	1.9	0.067	25	57	0.997	3.18	1.36	10.3	6
9.9	0.54	0.45	2.3	0.071	16	40	0.9991	3.39	0.62	9.4	5
9.5	0.59	0.44	2.3	0.071	21	68	0.9992	3.46	0.63	9.5	5
9.9	0.54	0.45	2.3	0.071	16	40	0.9991	3.39	0.62	9.4	5
9.5	0.59	0.44	2.3	0.071	21	68	0.9992	3.46	0.63	9.5	5
9.9	0.54	0.45	2.3	0.071	16	40	0.9991	3.39	0.62	9.4	5
7.8	0.64	0.1	6	0.115	5	11	0.9984	3.37	0.69	10.1	7
7.3	0.67	0.05	3.6	0.107	6	20	0.9972	3.4	0.63	10.1	5
8.3	0.845	0.01	2.2	0.07	5	14	0.9967	3.32	0.58	11	4
8.7	0.48	0.3	2.8	0.066	10	28	0.9964	3.33	0.67	11.2	7
6.7	0.42	0.27	8.6	0.068	24	148	0.9948	3.16	0.57	11.3	6
10.7	0.43	0.39	2.2	0.106	8	32	0.9986	2.89	0.5	9.6	5
9.8	0.88	0.25	2.5	0.104	35	155	1.001	3.41	0.67	11.2	5
15.9	0.36	0.65	7.5	0.096	22	71	0.9976	2.98	0.84	14.9	5
9.4	0.33	0.59	2.8	0.079	9	30	0.9976	3.12	0.54	12	6
8.6	0.47	0.47	2.4	0.074	7	29	0.9979	3.08	0.46	9.5	5
9.7	0.55	0.17	2.9	0.087	20	53	1.0004	3.14	0.61	9.4	5
10.7	0.43	0.39	2.2	0.106	8	32	0.9986	2.89	0.5	9.6	5
12	0.5	0.59	1.4	0.073	23	42	0.998	2.92	0.68	10.5	7
7.2	0.52	0.07	1.4	0.074	5	20	0.9973	3.32	0.81	9.6	6
7.1	0.84	0.02	4.4	0.096	5	13	0.997	3.41	0.57	11	4
7.2	0.52	0.07	1.4	0.074	5	20	0.9973	3.32	0.81	9.6	6
7.5	0.42	0.31	1.6	0.08	15	42	0.9978	3.31	0.64	9	5
7.2	0.57	0.06	1.6	0.076	9	27	0.9972	3.36	0.7	9.6	6
10.1	0.28	0.46	1.8	0.05	5	13	0.9974	3.04	0.79	10.2	6
12.1	0.4	0.52	2	0.092	15	54	1	3.03	0.66	10.2	5
9.4	0.59	0.14	2	0.084	25	48	0.9981	3.14	0.56	9.7	5
8.3	0.49	0.36	1.8	0.222	6	16	0.998	3.18	0.6	9.5	6
11.3	0.34	0.45	2	0.082	6	15	0.9988	2.94	0.66	9.2	6
10	0.73	0.43	2.3	0.059	15	31	0.9966	3.15	0.57	11	5
11.3	0.34	0.45	2	0.082	6	15	0.9988	2.94	0.66	9.2	6
6.9	0.4	0.24	2.5	0.083	30	45	0.9959	3.26	0.58	10	5
8.2	0.73	0.21	1.7	0.074	5	13	0.9968	3.2	0.52	9.5	5
9.8	1.24	0.34	2	0.079	32	151	0.998	3.15	0.53	9.5	5
8.2	0.73	0.21	1.7	0.074	5	13	0.9968	3.2	0.52	9.5	5
10.8	0.4	0.41	2.2	0.084	7	17	0.9984	3.08	0.67	9.3	6
9.3	0.41	0.39	2.2	0.064	12	31	0.9984	3.26	0.65	10.2	5
10.8	0.4	0.41	2.2	0.084	7	17	0.9984	3.08	0.67	9.3	6
8.6	0.8	0.11	2.3	0.084	12	31	0.9979	3.4	0.48	9.9	5
8.3	0.78	0.1	2.6	0.081	45	87	0.9983	3.48	0.53	10	5
10.8	0.26	0.45	3.3	0.06	20	49	0.9972	3.13	0.54	9.6	5
13.3	0.43	0.58	1.9	0.07	15	40	1.0004	3.06	0.49	9	5
8	0.45	0.23	2.2	0.094	16	29	0.9962	3.21	0.49	10.2	6
8.5	0.46	0.31	2.25	0.078	32	58	0.998	3.33	0.54	9.8	5
8.1	0.78	0.23	2.6	0.059	5	15	0.997	3.37	0.56	11.3	5
9.8	0.98	0.32	2.3	0.078	35	152	0.998	3.25	0.48	9.4	5
8.1	0.78	0.23	2.6	0.059	5	15	0.997	3.37	0.56	11.3	5
7.1	0.65	0.18	1.8	0.07	13	40	0.997	3.44	0.6	9.1	5
9.1	0.64	0.23	3.1	0.095	13	38	0.9998	3.28	0.59	9.7	5
7.7	0.66	0.04	1.6	0.039	4	9	0.9962	3.4	0.47	9.4	5
8.1	0.38	0.48	1.8	0.157	5	17	0.9976	3.3	1.05	9.4	5
7.4	1.185	0	4.25	0.097	5	14	0.9966	3.63	0.54	10.7	3
9.2	0.92	0.24	2.6	0.087	12	93	0.9998	3.48	0.54	9.8	5
8.6	0.49	0.51	2	0.422	16	62	0.9979	3.03	1.17	9	5
9	0.48	0.32	2.8	0.084	21	122	0.9984	3.32	0.62	9.4	5
9	0.47	0.31	2.7	0.084	24	125	0.9984	3.31	0.61	9.4	5
5.1	0.47	0.02	1.3	0.034	18	44	0.9921	3.9	0.62	12.8	6
7	0.65	0.02	2.1	0.066	8	25	0.9972	3.47	0.67	9.5	6
7	0.65	0.02	2.1	0.066	8	25	0.9972	3.47	0.67	9.5	6
9.4	0.615	0.28	3.2	0.087	18	72	1.0001	3.31	0.53	9.7	5
11.8	0.38	0.55	2.1	0.071	5	19	0.9986	3.11	0.62	10.8	6
10.6	1.02	0.43	2.9	0.076	26	88	0.9984	3.08	0.57	10.1	6
7	0.65	0.02	2.1	0.066	8	25	0.9972	3.47	0.67	9.5	6
7	0.64	0.02	2.1	0.067	9	23	0.997	3.47	0.67	9.4	6
7.5	0.38	0.48	2.6	0.073	22	84	0.9972	3.32	0.7	9.6	4
9.1	0.765	0.04	1.6	0.078	4	14	0.998	3.29	0.54	9.7	4
8.4	1.035	0.15	6	0.073	11	54	0.999	3.37	0.49	9.9	5
7	0.78	0.08	2	0.093	10	19	0.9956	3.4	0.47	10	5
7.4	0.49	0.19	3	0.077	16	37	0.9966	3.37	0.51	10.5	5
7.8	0.545	0.12	2.5	0.068	11	35	0.996	3.34	0.61	11.6	6
9.7	0.31	0.47	1.6	0.062	13	33	0.9983	3.27	0.66	10	6
10.6	1.025	0.43	2.8	0.08	21	84	0.9985	3.06	0.57	10.1	5
8.9	0.565	0.34	3	0.093	16	112	0.9998	3.38	0.61	9.5	5
8.7	0.69	0	3.2	0.084	13	33	0.9992	3.36	0.45	9.4	5
8	0.43	0.36	2.3	0.075	10	48	0.9976	3.34	0.46	9.4	5
9.9	0.74	0.28	2.6	0.078	21	77	0.998	3.28	0.51	9.8	5
7.2	0.49	0.18	2.7	0.069	13	34	0.9967	3.29	0.48	9.2	6
8	0.43	0.36	2.3	0.075	10	48	0.9976	3.34	0.46	9.4	5
7.6	0.46	0.11	2.6	0.079	12	49	0.9968	3.21	0.57	10	5
8.4	0.56	0.04	2	0.082	10	22	0.9976	3.22	0.44	9.6	5
7.1	0.66	0	3.9	0.086	17	45	0.9976	3.46	0.54	9.5	5
8.4	0.56	0.04	2	0.082	10	22	0.9976	3.22	0.44	9.6	5
8.9	0.48	0.24	2.85	0.094	35	106	0.9982	3.1	0.53	9.2	5
7.6	0.42	0.08	2.7	0.084	15	48	0.9968	3.21	0.59	10	5
7.1	0.31	0.3	2.2	0.053	36	127	0.9965	2.94	1.62	9.5	5
7.5	1.115	0.1	3.1	0.086	5	12	0.9958	3.54	0.6	11.2	4
9	0.66	0.17	3	0.077	5	13	0.9976	3.29	0.55	10.4	5
8.1	0.72	0.09	2.8	0.084	18	49	0.9994	3.43	0.72	11.1	6
6.4	0.57	0.02	1.8	0.067	4	11	0.997	3.46	0.68	9.5	5
6.4	0.57	0.02	1.8	0.067	4	11	0.997	3.46	0.68	9.5	5
6.4	0.865	0.03	3.2	0.071	27	58	0.995	3.61	0.49	12.7	6
9.5	0.55	0.66	2.3	0.387	12	37	0.9982	3.17	0.67	9.6	5
8.9	0.875	0.13	3.45	0.088	4	14	0.9994	3.44	0.52	11.5	5
7.3	0.835	0.03	2.1	0.092	10	19	0.9966	3.39	0.47	9.6	5
7	0.45	0.34	2.7	0.082	16	72	0.998	3.55	0.6	9.5	5
7.7	0.56	0.2	2	0.075	9	39	0.9987	3.48	0.62	9.3	5
7.7	0.965	0.1	2.1	0.112	11	22	0.9963	3.26	0.5	9.5	5
7.7	0.965	0.1	2.1	0.112	11	22	0.9963	3.26	0.5	9.5	5
8.2	0.59	0	2.5	0.093	19	58	1.0002	3.5	0.65	9.3	6
9	0.46	0.23	2.8	0.092	28	104	0.9983	3.1	0.56	9.2	5
9	0.69	0	2.4	0.088	19	38	0.999	3.35	0.6	9.3	5
8.3	0.76	0.29	4.2	0.075	12	16	0.9965	3.45	0.68	11.5	6
9.2	0.53	0.24	2.6	0.078	28	139	0.99788	3.21	0.57	9.5	5
6.5	0.615	0	1.9	0.065	9	18	0.9972	3.46	0.65	9.2	5
11.6	0.41	0.58	2.8	0.096	25	101	1.00024	3.13	0.53	10	5
11.1	0.39	0.54	2.7	0.095	21	101	1.0001	3.13	0.51	9.5	5
7.3	0.51	0.18	2.1	0.07	12	28	0.99768	3.52	0.73	9.5	6
8.2	0.34	0.38	2.5	0.08	12	57	0.9978	3.3	0.47	9	6
8.6	0.33	0.4	2.6	0.083	16	68	0.99782	3.3	0.48	9.4	5
7.2	0.5	0.18	2.1	0.071	12	31	0.99761	3.52	0.72	9.6	6
7.3	0.51	0.18	2.1	0.07	12	28	0.99768	3.52	0.73	9.5	6
8.3	0.65	0.1	2.9	0.089	17	40	0.99803	3.29	0.55	9.5	5
8.3	0.65	0.1	2.9	0.089	17	40	0.99803	3.29	0.55	9.5	5
7.6	0.54	0.13	2.5	0.097	24	66	0.99785	3.39	0.61	9.4	5
8.3	0.65	0.1	2.9	0.089	17	40	0.99803	3.29	0.55	9.5	5
7.8	0.48	0.68	1.7	0.415	14	32	0.99656	3.09	1.06	9.1	6
7.8	0.91	0.07	1.9	0.058	22	47	0.99525	3.51	0.43	10.7	6
6.3	0.98	0.01	2	0.057	15	33	0.99488	3.6	0.46	11.2	6
8.1	0.87	0	2.2	0.084	10	31	0.99656	3.25	0.5	9.8	5
8.1	0.87	0	2.2	0.084	10	31	0.99656	3.25	0.5	9.8	5
8.8	0.42	0.21	2.5	0.092	33	88	0.99823	3.19	0.52	9.2	5
9	0.58	0.25	2.8	0.075	9	104	0.99779	3.23	0.57	9.7	5
9.3	0.655	0.26	2	0.096	5	35	0.99738	3.25	0.42	9.6	5
8.8	0.7	0	1.7	0.069	8	19	0.99701	3.31	0.53	10	6
9.3	0.655	0.26	2	0.096	5	35	0.99738	3.25	0.42	9.6	5
9.1	0.68	0.11	2.8	0.093	11	44	0.99888	3.31	0.55	9.5	6
9.2	0.67	0.1	3	0.091	12	48	0.99888	3.31	0.54	9.5	6
8.8	0.59	0.18	2.9	0.089	12	74	0.99738	3.14	0.54	9.4	5
7.5	0.6	0.32	2.7	0.103	13	98	0.99938	3.45	0.62	9.5	5
7.1	0.59	0.02	2.3	0.082	24	94	0.99744	3.55	0.53	9.7	6
7.9	0.72	0.01	1.9	0.076	7	32	0.99668	3.39	0.54	9.6	5
7.1	0.59	0.02	2.3	0.082	24	94	0.99744	3.55	0.53	9.7	6
9.4	0.685	0.26	2.4	0.082	23	143	0.9978	3.28	0.55	9.4	5
9.5	0.57	0.27	2.3	0.082	23	144	0.99782	3.27	0.55	9.4	5
7.9	0.4	0.29	1.8	0.157	1	44	0.9973	3.3	0.92	9.5	6
7.9	0.4	0.3	1.8	0.157	2	45	0.99727	3.31	0.91	9.5	6
7.2	1	0	3	0.102	7	16	0.99586	3.43	0.46	10	5
6.9	0.765	0.18	2.4	0.243	5.5	48	0.99612	3.4	0.6	10.3	6
6.9	0.635	0.17	2.4	0.241	6	18	0.9961	3.4	0.59	10.3	6
8.3	0.43	0.3	3.4	0.079	7	34	0.99788	3.36	0.61	10.5	5
7.1	0.52	0.03	2.6	0.076	21	92	0.99745	3.5	0.6	9.8	5
7	0.57	0	2	0.19	12	45	0.99676	3.31	0.6	9.4	6
6.5	0.46	0.14	2.4	0.114	9	37	0.99732	3.66	0.65	9.8	5
9	0.82	0.05	2.4	0.081	26	96	0.99814	3.36	0.53	10	5
6.5	0.46	0.14	2.4	0.114	9	37	0.99732	3.66	0.65	9.8	5
7.1	0.59	0.01	2.5	0.077	20	85	0.99746	3.55	0.59	9.8	5
9.9	0.35	0.41	2.3	0.083	11	61	0.9982	3.21	0.5	9.5	5
9.9	0.35	0.41	2.3	0.083	11	61	0.9982	3.21	0.5	9.5	5
10	0.56	0.24	2.2	0.079	19	58	0.9991	3.18	0.56	10.1	6
10	0.56	0.24	2.2	0.079	19	58	0.9991	3.18	0.56	10.1	6
8.6	0.63	0.17	2.9	0.099	21	119	0.998	3.09	0.52	9.3	5
7.4	0.37	0.43	2.6	0.082	18	82	0.99708	3.33	0.68	9.7	6
8.8	0.64	0.17	2.9	0.084	25	130	0.99818	3.23	0.54	9.6	5
7.1	0.61	0.02	2.5	0.081	17	87	0.99745	3.48	0.6	9.7	6
7.7	0.6	0	2.6	0.055	7	13	0.99639	3.38	0.56	10.8	5
10.1	0.27	0.54	2.3	0.065	7	26	0.99531	3.17	0.53	12.5	6
10.8	0.89	0.3	2.6	0.132	7	60	0.99786	2.99	1.18	10.2	5
8.7	0.46	0.31	2.5	0.126	24	64	0.99746	3.1	0.74	9.6	5
9.3	0.37	0.44	1.6	0.038	21	42	0.99526	3.24	0.81	10.8	7
9.4	0.5	0.34	3.6	0.082	5	14	0.9987	3.29	0.52	10.7	6
9.4	0.5	0.34	3.6	0.082	5	14	0.9987	3.29	0.52	10.7	6
7.2	0.61	0.08	4	0.082	26	108	0.99641	3.25	0.51	9.4	5
8.6	0.55	0.09	3.3	0.068	8	17	0.99735	3.23	0.44	10	5
5.1	0.585	0	1.7	0.044	14	86	0.99264	3.56	0.94	12.9	7
7.7	0.56	0.08	2.5	0.114	14	46	0.9971	3.24	0.66	9.6	6
8.4	0.52	0.22	2.7	0.084	4	18	0.99682	3.26	0.57	9.9	6
8.2	0.28	0.4	2.4	0.052	4	10	0.99356	3.33	0.7	12.8	7
8.4	0.25	0.39	2	0.041	4	10	0.99386	3.27	0.71	12.5	7
8.2	0.28	0.4	2.4	0.052	4	10	0.99356	3.33	0.7	12.8	7
7.4	0.53	0.12	1.9	0.165	4	12	0.99702	3.26	0.86	9.2	5
7.6	0.48	0.31	2.8	0.07	4	15	0.99693	3.22	0.55	10.3	6
7.3	0.49	0.1	2.6	0.068	4	14	0.99562	3.3	0.47	10.5	5
12.9	0.5	0.55	2.8	0.072	7	24	1.00012	3.09	0.68	10.9	6
10.8	0.45	0.33	2.5	0.099	20	38	0.99818	3.24	0.71	10.8	5
6.9	0.39	0.24	2.1	0.102	4	7	0.99462	3.44	0.58	11.4	4
12.6	0.41	0.54	2.8	0.103	19	41	0.99939	3.21	0.76	11.3	6
10.8	0.45	0.33	2.5	0.099	20	38	0.99818	3.24	0.71	10.8	5
9.8	0.51	0.19	3.2	0.081	8	30	0.9984	3.23	0.58	10.5	6
10.8	0.29	0.42	1.6	0.084	19	27	0.99545	3.28	0.73	11.9	6
7.1	0.715	0	2.35	0.071	21	47	0.99632	3.29	0.45	9.4	5
9.1	0.66	0.15	3.2	0.097	9	59	0.99976	3.28	0.54	9.6	5
7	0.685	0	1.9	0.099	9	22	0.99606	3.34	0.6	9.7	5
4.9	0.42	0	2.1	0.048	16	42	0.99154	3.71	0.74	14	7
6.7	0.54	0.13	2	0.076	15	36	0.9973	3.61	0.64	9.8	5
6.7	0.54	0.13	2	0.076	15	36	0.9973	3.61	0.64	9.8	5
7.1	0.48	0.28	2.8	0.068	6	16	0.99682	3.24	0.53	10.3	5
7.1	0.46	0.14	2.8	0.076	15	37	0.99624	3.36	0.49	10.7	5
7.5	0.27	0.34	2.3	0.05	4	8	0.9951	3.4	0.64	11	7
7.1	0.46	0.14	2.8	0.076	15	37	0.99624	3.36	0.49	10.7	5
7.8	0.57	0.09	2.3	0.065	34	45	0.99417	3.46	0.74	12.7	8
5.9	0.61	0.08	2.1	0.071	16	24	0.99376	3.56	0.77	11.1	6
7.5	0.685	0.07	2.5	0.058	5	9	0.99632	3.38	0.55	10.9	4
5.9	0.61	0.08	2.1	0.071	16	24	0.99376	3.56	0.77	11.1	6
10.4	0.44	0.42	1.5	0.145	34	48	0.99832	3.38	0.86	9.9	3
11.6	0.47	0.44	1.6	0.147	36	51	0.99836	3.38	0.86	9.9	4
8.8	0.685	0.26	1.6	0.088	16	23	0.99694	3.32	0.47	9.4	5
7.6	0.665	0.1	1.5	0.066	27	55	0.99655	3.39	0.51	9.3	5
6.7	0.28	0.28	2.4	0.012	36	100	0.99064	3.26	0.39	11.7	7
6.7	0.28	0.28	2.4	0.012	36	100	0.99064	3.26	0.39	11.7	7
10.1	0.31	0.35	1.6	0.075	9	28	0.99672	3.24	0.83	11.2	7
6	0.5	0.04	2.2	0.092	13	26	0.99647	3.46	0.47	10	5
11.1	0.42	0.47	2.65	0.085	9	34	0.99736	3.24	0.77	12.1	7
6.6	0.66	0	3	0.115	21	31	0.99629	3.45	0.63	10.3	5
10.6	0.5	0.45	2.6	0.119	34	68	0.99708	3.23	0.72	10.9	6
7.1	0.685	0.35	2	0.088	9	92	0.9963	3.28	0.62	9.4	5
9.9	0.25	0.46	1.7	0.062	26	42	0.9959	3.18	0.83	10.6	6
6.4	0.64	0.21	1.8	0.081	14	31	0.99689	3.59	0.66	9.8	5
6.4	0.64	0.21	1.8	0.081	14	31	0.99689	3.59	0.66	9.8	5
7.4	0.68	0.16	1.8	0.078	12	39	0.9977	3.5	0.7	9.9	6
6.4	0.64	0.21	1.8	0.081	14	31	0.99689	3.59	0.66	9.8	5
6.4	0.63	0.21	1.6	0.08	12	32	0.99689	3.58	0.66	9.8	5
9.3	0.43	0.44	1.9	0.085	9	22	0.99708	3.28	0.55	9.5	5
9.3	0.43	0.44	1.9	0.085	9	22	0.99708	3.28	0.55	9.5	5
8	0.42	0.32	2.5	0.08	26	122	0.99801	3.22	1.07	9.7	5
9.3	0.36	0.39	1.5	0.08	41	55	0.99652	3.47	0.73	10.9	6
9.3	0.36	0.39	1.5	0.08	41	55	0.99652	3.47	0.73	10.9	6
7.6	0.735	0.02	2.5	0.071	10	14	0.99538	3.51	0.71	11.7	7
9.3	0.36	0.39	1.5	0.08	41	55	0.99652	3.47	0.73	10.9	6
8.2	0.26	0.34	2.5	0.073	16	47	0.99594	3.4	0.78	11.3	7
11.7	0.28	0.47	1.7	0.054	17	32	0.99686	3.15	0.67	10.6	7
6.8	0.56	0.22	1.8	0.074	15	24	0.99438	3.4	0.82	11.2	6
7.2	0.62	0.06	2.7	0.077	15	85	0.99746	3.51	0.54	9.5	5
5.8	1.01	0.66	2	0.039	15	88	0.99357	3.66	0.6	11.5	6
7.5	0.42	0.32	2.7	0.067	7	25	0.99628	3.24	0.44	10.4	5
7.2	0.62	0.06	2.5	0.078	17	84	0.99746	3.51	0.53	9.7	5
7.2	0.62	0.06	2.7	0.077	15	85	0.99746	3.51	0.54	9.5	5
7.2	0.635	0.07	2.6	0.077	16	86	0.99748	3.51	0.54	9.7	5
6.8	0.49	0.22	2.3	0.071	13	24	0.99438	3.41	0.83	11.3	6
6.9	0.51	0.23	2	0.072	13	22	0.99438	3.4	0.84	11.2	6
6.8	0.56	0.22	1.8	0.074	15	24	0.99438	3.4	0.82	11.2	6
7.6	0.63	0.03	2	0.08	27	43	0.99578	3.44	0.64	10.9	6
7.7	0.715	0.01	2.1	0.064	31	43	0.99371	3.41	0.57	11.8	6
6.9	0.56	0.03	1.5	0.086	36	46	0.99522	3.53	0.57	10.6	5
7.3	0.35	0.24	2	0.067	28	48	0.99576	3.43	0.54	10	4
9.1	0.21	0.37	1.6	0.067	6	10	0.99552	3.23	0.58	11.1	7
10.4	0.38	0.46	2.1	0.104	6	10	0.99664	3.12	0.65	11.8	7
8.8	0.31	0.4	2.8	0.109	7	16	0.99614	3.31	0.79	11.8	7
7.1	0.47	0	2.2	0.067	7	14	0.99517	3.4	0.58	10.9	4
7.7	0.715	0.01	2.1	0.064	31	43	0.99371	3.41	0.57	11.8	6
8.8	0.61	0.19	4	0.094	30	69	0.99787	3.22	0.5	10	6
7.2	0.6	0.04	2.5	0.076	18	88	0.99745	3.53	0.55	9.5	5
9.2	0.56	0.18	1.6	0.078	10	21	0.99576	3.15	0.49	9.9	5
7.6	0.715	0	2.1	0.068	30	35	0.99533	3.48	0.65	11.4	6
8.4	0.31	0.29	3.1	0.194	14	26	0.99536	3.22	0.78	12	6
7.2	0.6	0.04	2.5	0.076	18	88	0.99745	3.53	0.55	9.5	5
8.8	0.61	0.19	4	0.094	30	69	0.99787	3.22	0.5	10	6
8.9	0.75	0.14	2.5	0.086	9	30	0.99824	3.34	0.64	10.5	5
9	0.8	0.12	2.4	0.083	8	28	0.99836	3.33	0.65	10.4	6
10.7	0.52	0.38	2.6	0.066	29	56	0.99577	3.15	0.79	12.1	7
6.8	0.57	0	2.5	0.072	32	64	0.99491	3.43	0.56	11.2	6
10.7	0.9	0.34	6.6	0.112	23	99	1.00289	3.22	0.68	9.3	5
7.2	0.34	0.24	2	0.071	30	52	0.99576	3.44	0.58	10.1	5
7.2	0.66	0.03	2.3	0.078	16	86	0.99743	3.53	0.57	9.7	5
10.1	0.45	0.23	1.9	0.082	10	18	0.99774	3.22	0.65	9.3	6
7.2	0.66	0.03	2.3	0.078	16	86	0.99743	3.53	0.57	9.7	5
7.2	0.63	0.03	2.2	0.08	17	88	0.99745	3.53	0.58	9.8	6
7.1	0.59	0.01	2.3	0.08	27	43	0.9955	3.42	0.58	10.7	6
8.3	0.31	0.39	2.4	0.078	17	43	0.99444	3.31	0.77	12.5	7
7.1	0.59	0.01	2.3	0.08	27	43	0.9955	3.42	0.58	10.7	6
8.3	0.31	0.39	2.4	0.078	17	43	0.99444	3.31	0.77	12.5	7
8.3	1.02	0.02	3.4	0.084	6	11	0.99892	3.48	0.49	11	3
8.9	0.31	0.36	2.6	0.056	10	39	0.99562	3.4	0.69	11.8	5
7.4	0.635	0.1	2.4	0.08	16	33	0.99736	3.58	0.69	10.8	7
7.4	0.635	0.1	2.4	0.08	16	33	0.99736	3.58	0.69	10.8	7
6.8	0.59	0.06	6	0.06	11	18	0.9962	3.41	0.59	10.8	7
6.8	0.59	0.06	6	0.06	11	18	0.9962	3.41	0.59	10.8	7
9.2	0.58	0.2	3	0.081	15	115	0.998	3.23	0.59	9.5	5
7.2	0.54	0.27	2.6	0.084	12	78	0.9964	3.39	0.71	11	5
6.1	0.56	0	2.2	0.079	6	9	0.9948	3.59	0.54	11.5	6
7.4	0.52	0.13	2.4	0.078	34	61	0.99528	3.43	0.59	10.8	6
7.3	0.305	0.39	1.2	0.059	7	11	0.99331	3.29	0.52	11.5	6
9.3	0.38	0.48	3.8	0.132	3	11	0.99577	3.23	0.57	13.2	6
9.1	0.28	0.46	9	0.114	3	9	0.99901	3.18	0.6	10.9	6
10	0.46	0.44	2.9	0.065	4	8	0.99674	3.33	0.62	12.2	6
9.4	0.395	0.46	4.6	0.094	3	10	0.99639	3.27	0.64	12.2	7
7.3	0.305	0.39	1.2	0.059	7	11	0.99331	3.29	0.52	11.5	6
8.6	0.315	0.4	2.2	0.079	3	6	0.99512	3.27	0.67	11.9	6
5.3	0.715	0.19	1.5	0.161	7	62	0.99395	3.62	0.61	11	5
6.8	0.41	0.31	8.8	0.084	26	45	0.99824	3.38	0.64	10.1	6
8.4	0.36	0.32	2.2	0.081	32	79	0.9964	3.3	0.72	11	6
8.4	0.62	0.12	1.8	0.072	38	46	0.99504	3.38	0.89	11.8	6
9.6	0.41	0.37	2.3	0.091	10	23	0.99786	3.24	0.56	10.5	5
8.4	0.36	0.32	2.2	0.081	32	79	0.9964	3.3	0.72	11	6
8.4	0.62	0.12	1.8	0.072	38	46	0.99504	3.38	0.89	11.8	6
6.8	0.41	0.31	8.8	0.084	26	45	0.99824	3.38	0.64	10.1	6
8.6	0.47	0.27	2.3	0.055	14	28	0.99516	3.18	0.8	11.2	5
8.6	0.22	0.36	1.9	0.064	53	77	0.99604	3.47	0.87	11	7
9.4	0.24	0.33	2.3	0.061	52	73	0.99786	3.47	0.9	10.2	6
8.4	0.67	0.19	2.2	0.093	11	75	0.99736	3.2	0.59	9.2	4
8.6	0.47	0.27	2.3	0.055	14	28	0.99516	3.18	0.8	11.2	5
8.7	0.33	0.38	3.3	0.063	10	19	0.99468	3.3	0.73	12	7
6.6	0.61	0.01	1.9	0.08	8	25	0.99746	3.69	0.73	10.5	5
7.4	0.61	0.01	2	0.074	13	38	0.99748	3.48	0.65	9.8	5
7.6	0.4	0.29	1.9	0.078	29	66	0.9971	3.45	0.59	9.5	6
7.4	0.61	0.01	2	0.074	13	38	0.99748	3.48	0.65	9.8	5
6.6	0.61	0.01	1.9	0.08	8	25	0.99746	3.69	0.73	10.5	5
8.8	0.3	0.38	2.3	0.06	19	72	0.99543	3.39	0.72	11.8	6
8.8	0.3	0.38	2.3	0.06	19	72	0.99543	3.39	0.72	11.8	6
12	0.63	0.5	1.4	0.071	6	26	0.99791	3.07	0.6	10.4	4
7.2	0.38	0.38	2.8	0.068	23	42	0.99356	3.34	0.72	12.9	7
6.2	0.46	0.17	1.6	0.073	7	11	0.99425	3.61	0.54	11.4	5
9.6	0.33	0.52	2.2	0.074	13	25	0.99509	3.36	0.76	12.4	7
9.9	0.27	0.49	5	0.082	9	17	0.99484	3.19	0.52	12.5	7
10.1	0.43	0.4	2.6	0.092	13	52	0.99834	3.22	0.64	10	7
9.8	0.5	0.34	2.3	0.094	10	45	0.99864	3.24	0.6	9.7	7
8.3	0.3	0.49	3.8	0.09	11	24	0.99498	3.27	0.64	12.1	7
10.2	0.44	0.42	2	0.071	7	20	0.99566	3.14	0.79	11.1	7
10.2	0.44	0.58	4.1	0.092	11	24	0.99745	3.29	0.99	12	7
8.3	0.28	0.48	2.1	0.093	6	12	0.99408	3.26	0.62	12.4	7
8.9	0.12	0.45	1.8	0.075	10	21	0.99552	3.41	0.76	11.9	7
8.9	0.12	0.45	1.8	0.075	10	21	0.99552	3.41	0.76	11.9	7
8.9	0.12	0.45	1.8	0.075	10	21	0.99552	3.41	0.76	11.9	7
8.3	0.28	0.48	2.1	0.093	6	12	0.99408	3.26	0.62	12.4	7
8.2	0.31	0.4	2.2	0.058	6	10	0.99536	3.31	0.68	11.2	7
10.2	0.34	0.48	2.1	0.052	5	9	0.99458	3.2	0.69	12.1	7
7.6	0.43	0.4	2.7	0.082	6	11	0.99538	3.44	0.54	12.2	6
8.5	0.21	0.52	1.9	0.09	9	23	0.99648	3.36	0.67	10.4	5
9	0.36	0.52	2.1	0.111	5	10	0.99568	3.31	0.62	11.3	6
9.5	0.37	0.52	2	0.088	12	51	0.99613	3.29	0.58	11.1	6
6.4	0.57	0.12	2.3	0.12	25	36	0.99519	3.47	0.71	11.3	7
8	0.59	0.05	2	0.089	12	32	0.99735	3.36	0.61	10	5
8.5	0.47	0.27	1.9	0.058	18	38	0.99518	3.16	0.85	11.1	6
7.1	0.56	0.14	1.6	0.078	7	18	0.99592	3.27	0.62	9.3	5
6.6	0.57	0.02	2.1	0.115	6	16	0.99654	3.38	0.69	9.5	5
8.8	0.27	0.39	2	0.1	20	27	0.99546	3.15	0.69	11.2	6
8.5	0.47	0.27	1.9	0.058	18	38	0.99518	3.16	0.85	11.1	6
8.3	0.34	0.4	2.4	0.065	24	48	0.99554	3.34	0.86	11	6
9	0.38	0.41	2.4	0.103	6	10	0.99604	3.13	0.58	11.9	7
8.5	0.66	0.2	2.1	0.097	23	113	0.99733	3.13	0.48	9.2	5
9	0.4	0.43	2.4	0.068	29	46	0.9943	3.2	0.6	12.2	6
6.7	0.56	0.09	2.9	0.079	7	22	0.99669	3.46	0.61	10.2	5
10.4	0.26	0.48	1.9	0.066	6	10	0.99724	3.33	0.87	10.9	6
10.4	0.26	0.48	1.9	0.066	6	10	0.99724	3.33	0.87	10.9	6
10.1	0.38	0.5	2.4	0.104	6	13	0.99643	3.22	0.65	11.6	7
8.5	0.34	0.44	1.7	0.079	6	12	0.99605	3.52	0.63	10.7	5
8.8	0.33	0.41	5.9	0.073	7	13	0.99658	3.3	0.62	12.1	7
7.2	0.41	0.3	2.1	0.083	35	72	0.997	3.44	0.52	9.4	5
7.2	0.41	0.3	2.1	0.083	35	72	0.997	3.44	0.52	9.4	5
8.4	0.59	0.29	2.6	0.109	31	119	0.99801	3.15	0.5	9.1	5
7	0.4	0.32	3.6	0.061	9	29	0.99416	3.28	0.49	11.3	7
12.2	0.45	0.49	1.4	0.075	3	6	0.9969	3.13	0.63	10.4	5
9.1	0.5	0.3	1.9	0.065	8	17	0.99774	3.32	0.71	10.5	6
9.5	0.86	0.26	1.9	0.079	13	28	0.99712	3.25	0.62	10	5
7.3	0.52	0.32	2.1	0.07	51	70	0.99418	3.34	0.82	12.9	6
9.1	0.5	0.3	1.9	0.065	8	17	0.99774	3.32	0.71	10.5	6
12.2	0.45	0.49	1.4	0.075	3	6	0.9969	3.13	0.63	10.4	5
7.4	0.58	0	2	0.064	7	11	0.99562	3.45	0.58	11.3	6
9.8	0.34	0.39	1.4	0.066	3	7	0.9947	3.19	0.55	11.4	7
7.1	0.36	0.3	1.6	0.08	35	70	0.99693	3.44	0.5	9.4	5
7.7	0.39	0.12	1.7	0.097	19	27	0.99596	3.16	0.49	9.4	5
9.7	0.295	0.4	1.5	0.073	14	21	0.99556	3.14	0.51	10.9	6
7.7	0.39	0.12	1.7	0.097	19	27	0.99596	3.16	0.49	9.4	5
7.1	0.34	0.28	2	0.082	31	68	0.99694	3.45	0.48	9.4	5
6.5	0.4	0.1	2	0.076	30	47	0.99554	3.36	0.48	9.4	6
7.1	0.34	0.28	2	0.082	31	68	0.99694	3.45	0.48	9.4	5
10	0.35	0.45	2.5	0.092	20	88	0.99918	3.15	0.43	9.4	5
7.7	0.6	0.06	2	0.079	19	41	0.99697	3.39	0.62	10.1	6
5.6	0.66	0	2.2	0.087	3	11	0.99378	3.71	0.63	12.8	7
5.6	0.66	0	2.2	0.087	3	11	0.99378	3.71	0.63	12.8	7
8.9	0.84	0.34	1.4	0.05	4	10	0.99554	3.12	0.48	9.1	6
6.4	0.69	0	1.65	0.055	7	12	0.99162	3.47	0.53	12.9	6
7.5	0.43	0.3	2.2	0.062	6	12	0.99495	3.44	0.72	11.5	7
9.9	0.35	0.38	1.5	0.058	31	47	0.99676	3.26	0.82	10.6	7
9.1	0.29	0.33	2.05	0.063	13	27	0.99516	3.26	0.84	11.7	7
6.8	0.36	0.32	1.8	0.067	4	8	0.9928	3.36	0.55	12.8	7
8.2	0.43	0.29	1.6	0.081	27	45	0.99603	3.25	0.54	10.3	5
6.8	0.36	0.32	1.8	0.067	4	8	0.9928	3.36	0.55	12.8	7
9.1	0.29	0.33	2.05	0.063	13	27	0.99516	3.26	0.84	11.7	7
9.1	0.3	0.34	2	0.064	12	25	0.99516	3.26	0.84	11.7	7
8.9	0.35	0.4	3.6	0.11	12	24	0.99549	3.23	0.7	12	7
9.6	0.5	0.36	2.8	0.116	26	55	0.99722	3.18	0.68	10.9	5
8.9	0.28	0.45	1.7	0.067	7	12	0.99354	3.25	0.55	12.3	7
8.9	0.32	0.31	2	0.088	12	19	0.9957	3.17	0.55	10.4	6
7.7	1.005	0.15	2.1	0.102	11	32	0.99604	3.23	0.48	10	5
7.5	0.71	0	1.6	0.092	22	31	0.99635	3.38	0.58	10	6
8	0.58	0.16	2	0.12	3	7	0.99454	3.22	0.58	11.2	6
10.5	0.39	0.46	2.2	0.075	14	27	0.99598	3.06	0.84	11.4	6
8.9	0.38	0.4	2.2	0.068	12	28	0.99486	3.27	0.75	12.6	7
8	0.18	0.37	0.9	0.049	36	109	0.99007	2.89	0.44	12.7	6
8	0.18	0.37	0.9	0.049	36	109	0.99007	2.89	0.44	12.7	6
7	0.5	0.14	1.8	0.078	10	23	0.99636	3.53	0.61	10.4	5
11.3	0.36	0.66	2.4	0.123	3	8	0.99642	3.2	0.53	11.9	6
11.3	0.36	0.66	2.4	0.123	3	8	0.99642	3.2	0.53	11.9	6
7	0.51	0.09	2.1	0.062	4	9	0.99584	3.35	0.54	10.5	5
8.2	0.32	0.42	2.3	0.098	3	9	0.99506	3.27	0.55	12.3	6
7.7	0.58	0.01	1.8	0.088	12	18	0.99568	3.32	0.56	10.5	7
8.6	0.83	0	2.8	0.095	17	43	0.99822	3.33	0.6	10.4	6
7.9	0.31	0.32	1.9	0.066	14	36	0.99364	3.41	0.56	12.6	6
6.4	0.795	0	2.2	0.065	28	52	0.99378	3.49	0.52	11.6	5
7.2	0.34	0.21	2.5	0.075	41	68	0.99586	3.37	0.54	10.1	6
7.7	0.58	0.01	1.8	0.088	12	18	0.99568	3.32	0.56	10.5	7
7.1	0.59	0	2.1	0.091	9	14	0.99488	3.42	0.55	11.5	7
7.3	0.55	0.01	1.8	0.093	9	15	0.99514	3.35	0.58	11	7
8.1	0.82	0	4.1	0.095	5	14	0.99854	3.36	0.53	9.6	5
7.5	0.57	0.08	2.6	0.089	14	27	0.99592	3.3	0.59	10.4	6
8.9	0.745	0.18	2.5	0.077	15	48	0.99739	3.2	0.47	9.7	6
10.1	0.37	0.34	2.4	0.085	5	17	0.99683	3.17	0.65	10.6	7
7.6	0.31	0.34	2.5	0.082	26	35	0.99356	3.22	0.59	12.5	7
7.3	0.91	0.1	1.8	0.074	20	56	0.99672	3.35	0.56	9.2	5
8.7	0.41	0.41	6.2	0.078	25	42	0.9953	3.24	0.77	12.6	7
8.9	0.5	0.21	2.2	0.088	21	39	0.99692	3.33	0.83	11.1	6
7.4	0.965	0	2.2	0.088	16	32	0.99756	3.58	0.67	10.2	5
6.9	0.49	0.19	1.7	0.079	13	26	0.99547	3.38	0.64	9.8	6
8.9	0.5	0.21	2.2	0.088	21	39	0.99692	3.33	0.83	11.1	6
9.5	0.39	0.41	8.9	0.069	18	39	0.99859	3.29	0.81	10.9	7
6.4	0.39	0.33	3.3	0.046	12	53	0.99294	3.36	0.62	12.2	6
6.9	0.44	0	1.4	0.07	32	38	0.99438	3.32	0.58	11.4	6
7.6	0.78	0	1.7	0.076	33	45	0.99612	3.31	0.62	10.7	6
7.1	0.43	0.17	1.8	0.082	27	51	0.99634	3.49	0.64	10.4	5
9.3	0.49	0.36	1.7	0.081	3	14	0.99702	3.27	0.78	10.9	6
9.3	0.5	0.36	1.8	0.084	6	17	0.99704	3.27	0.77	10.8	6
7.1	0.43	0.17	1.8	0.082	27	51	0.99634	3.49	0.64	10.4	5
8.5	0.46	0.59	1.4	0.414	16	45	0.99702	3.03	1.34	9.2	5
5.6	0.605	0.05	2.4	0.073	19	25	0.99258	3.56	0.55	12.9	5
8.3	0.33	0.42	2.3	0.07	9	20	0.99426	3.38	0.77	12.7	7
8.2	0.64	0.27	2	0.095	5	77	0.99747	3.13	0.62	9.1	6
8.2	0.64	0.27	2	0.095	5	77	0.99747	3.13	0.62	9.1	6
8.9	0.48	0.53	4	0.101	3	10	0.99586	3.21	0.59	12.1	7
7.6	0.42	0.25	3.9	0.104	28	90	0.99784	3.15	0.57	9.1	5
9.9	0.53	0.57	2.4	0.093	30	52	0.9971	3.19	0.76	11.6	7
8.9	0.48	0.53	4	0.101	3	10	0.99586	3.21	0.59	12.1	7
11.6	0.23	0.57	1.8	0.074	3	8	0.9981	3.14	0.7	9.9	6
9.1	0.4	0.5	1.8	0.071	7	16	0.99462	3.21	0.69	12.5	8
8	0.38	0.44	1.9	0.098	6	15	0.9956	3.3	0.64	11.4	6
10.2	0.29	0.65	2.4	0.075	6	17	0.99565	3.22	0.63	11.8	6
8.2	0.74	0.09	2	0.067	5	10	0.99418	3.28	0.57	11.8	6
7.7	0.61	0.18	2.4	0.083	6	20	0.9963	3.29	0.6	10.2	6
6.6	0.52	0.08	2.4	0.07	13	26	0.99358	3.4	0.72	12.5	7
11.1	0.31	0.53	2.2	0.06	3	10	0.99572	3.02	0.83	10.9	7
11.1	0.31	0.53	2.2	0.06	3	10	0.99572	3.02	0.83	10.9	7
8	0.62	0.35	2.8	0.086	28	52	0.997	3.31	0.62	10.8	5
9.3	0.33	0.45	1.5	0.057	19	37	0.99498	3.18	0.89	11.1	7
7.5	0.77	0.2	8.1	0.098	30	92	0.99892	3.2	0.58	9.2	5
7.2	0.35	0.26	1.8	0.083	33	75	0.9968	3.4	0.58	9.5	6
8	0.62	0.33	2.7	0.088	16	37	0.9972	3.31	0.58	10.7	6
7.5	0.77	0.2	8.1	0.098	30	92	0.99892	3.2	0.58	9.2	5
9.1	0.25	0.34	2	0.071	45	67	0.99769	3.44	0.86	10.2	7
9.9	0.32	0.56	2	0.073	3	8	0.99534	3.15	0.73	11.4	6
8.6	0.37	0.65	6.4	0.08	3	8	0.99817	3.27	0.58	11	5
8.6	0.37	0.65	6.4	0.08	3	8	0.99817	3.27	0.58	11	5
7.9	0.3	0.68	8.3	0.05	37.5	278	0.99316	3.01	0.51	12.3	7
10.3	0.27	0.56	1.4	0.047	3	8	0.99471	3.16	0.51	11.8	6
7.9	0.3	0.68	8.3	0.05	37.5	289	0.99316	3.01	0.51	12.3	7
7.2	0.38	0.3	1.8	0.073	31	70	0.99685	3.42	0.59	9.5	6
8.7	0.42	0.45	2.4	0.072	32	59	0.99617	3.33	0.77	12	6
7.2	0.38	0.3	1.8	0.073	31	70	0.99685	3.42	0.59	9.5	6
6.8	0.48	0.08	1.8	0.074	40	64	0.99529	3.12	0.49	9.6	5
8.5	0.34	0.4	4.7	0.055	3	9	0.99738	3.38	0.66	11.6	7
7.9	0.19	0.42	1.6	0.057	18	30	0.994	3.29	0.69	11.2	6
11.6	0.41	0.54	1.5	0.095	22	41	0.99735	3.02	0.76	9.9	7
11.6	0.41	0.54	1.5	0.095	22	41	0.99735	3.02	0.76	9.9	7
10	0.26	0.54	1.9	0.083	42	74	0.99451	2.98	0.63	11.8	8
7.9	0.34	0.42	2	0.086	8	19	0.99546	3.35	0.6	11.4	6
7	0.54	0.09	2	0.081	10	16	0.99479	3.43	0.59	11.5	6
9.2	0.31	0.36	2.2	0.079	11	31	0.99615	3.33	0.86	12	7
6.6	0.725	0.09	5.5	0.117	9	17	0.99655	3.35	0.49	10.8	6
9.4	0.4	0.47	2.5	0.087	6	20	0.99772	3.15	0.5	10.5	5
6.6	0.725	0.09	5.5	0.117	9	17	0.99655	3.35	0.49	10.8	6
8.6	0.52	0.38	1.5	0.096	5	18	0.99666	3.2	0.52	9.4	5
8	0.31	0.45	2.1	0.216	5	16	0.99358	3.15	0.81	12.5	7
8.6	0.52	0.38	1.5	0.096	5	18	0.99666	3.2	0.52	9.4	5
8.4	0.34	0.42	2.1	0.072	23	36	0.99392	3.11	0.78	12.4	6
7.4	0.49	0.27	2.1	0.071	14	25	0.99388	3.35	0.63	12	6
6.1	0.48	0.09	1.7	0.078	18	30	0.99402	3.45	0.54	11.2	6
7.4	0.49	0.27	2.1	0.071	14	25	0.99388	3.35	0.63	12	6
8	0.48	0.34	2.2	0.073	16	25	0.9936	3.28	0.66	12.4	6
6.3	0.57	0.28	2.1	0.048	13	49	0.99374	3.41	0.6	12.8	5
8.2	0.23	0.42	1.9	0.069	9	17	0.99376	3.21	0.54	12.3	6
9.1	0.3	0.41	2	0.068	10	24	0.99523	3.27	0.85	11.7	7
8.1	0.78	0.1	3.3	0.09	4	13	0.99855	3.36	0.49	9.5	5
10.8	0.47	0.43	2.1	0.171	27	66	0.9982	3.17	0.76	10.8	6
8.3	0.53	0	1.4	0.07	6	14	0.99593	3.25	0.64	10	6
5.4	0.42	0.27	2	0.092	23	55	0.99471	3.78	0.64	12.3	7
7.9	0.33	0.41	1.5	0.056	6	35	0.99396	3.29	0.71	11	6
8.9	0.24	0.39	1.6	0.074	3	10	0.99698	3.12	0.59	9.5	6
5	0.4	0.5	4.3	0.046	29	80	0.9902	3.49	0.66	13.6	6
7	0.69	0.07	2.5	0.091	15	21	0.99572	3.38	0.6	11.3	6
7	0.69	0.07	2.5	0.091	15	21	0.99572	3.38	0.6	11.3	6
7	0.69	0.07	2.5	0.091	15	21	0.99572	3.38	0.6	11.3	6
7.1	0.39	0.12	2.1	0.065	14	24	0.99252	3.3	0.53	13.3	6
5.6	0.66	0	2.5	0.066	7	15	0.99256	3.52	0.58	12.9	5
7.9	0.54	0.34	2.5	0.076	8	17	0.99235	3.2	0.72	13.1	8
6.6	0.5	0	1.8	0.062	21	28	0.99352	3.44	0.55	12.3	6
6.3	0.47	0	1.4	0.055	27	33	0.9922	3.45	0.48	12.3	6
10.7	0.4	0.37	1.9	0.081	17	29	0.99674	3.12	0.65	11.2	6
6.5	0.58	0	2.2	0.096	3	13	0.99557	3.62	0.62	11.5	4
8.8	0.24	0.35	1.7	0.055	13	27	0.99394	3.14	0.59	11.3	7
5.8	0.29	0.26	1.7	0.063	3	11	0.9915	3.39	0.54	13.5	6
6.3	0.76	0	2.9	0.072	26	52	0.99379	3.51	0.6	11.5	6
10	0.43	0.33	2.7	0.095	28	89	0.9984	3.22	0.68	10	5
10.5	0.43	0.35	3.3	0.092	24	70	0.99798	3.21	0.69	10.5	6
9.1	0.6	0	1.9	0.058	5	10	0.9977	3.18	0.63	10.4	6
5.9	0.19	0.21	1.7	0.045	57	135	0.99341	3.32	0.44	9.5	5
7.4	0.36	0.34	1.8	0.075	18	38	0.9933	3.38	0.88	13.6	7
7.2	0.48	0.07	5.5	0.089	10	18	0.99684	3.37	0.68	11.2	7
8.5	0.28	0.35	1.7	0.061	6	15	0.99524	3.3	0.74	11.8	7
8	0.25	0.43	1.7	0.067	22	50	0.9946	3.38	0.6	11.9	6
10.4	0.52	0.45	2	0.08	6	13	0.99774	3.22	0.76	11.4	6
10.4	0.52	0.45	2	0.08	6	13	0.99774	3.22	0.76	11.4	6
7.5	0.41	0.15	3.7	0.104	29	94	0.99786	3.14	0.58	9.1	5
8.2	0.51	0.24	2	0.079	16	86	0.99764	3.34	0.64	9.5	6
7.3	0.4	0.3	1.7	0.08	33	79	0.9969	3.41	0.65	9.5	6
8.2	0.38	0.32	2.5	0.08	24	71	0.99624	3.27	0.85	11	6
6.9	0.45	0.11	2.4	0.043	6	12	0.99354	3.3	0.65	11.4	6
7	0.22	0.3	1.8	0.065	16	20	0.99672	3.61	0.82	10	6
7.3	0.32	0.23	2.3	0.066	35	70	0.99588	3.43	0.62	10.1	5
8.2	0.2	0.43	2.5	0.076	31	51	0.99672	3.53	0.81	10.4	6
7.8	0.5	0.12	1.8	0.178	6	21	0.996	3.28	0.87	9.8	6
10	0.41	0.45	6.2	0.071	6	14	0.99702	3.21	0.49	11.8	7
7.8	0.39	0.42	2	0.086	9	21	0.99526	3.39	0.66	11.6	6
10	0.35	0.47	2	0.061	6	11	0.99585	3.23	0.52	12	6
8.2	0.33	0.32	2.8	0.067	4	12	0.99473	3.3	0.76	12.8	7
6.1	0.58	0.23	2.5	0.044	16	70	0.99352	3.46	0.65	12.5	6
8.3	0.6	0.25	2.2	0.118	9	38	0.99616	3.15	0.53	9.8	5
9.6	0.42	0.35	2.1	0.083	17	38	0.99622	3.23	0.66	11.1	6
6.6	0.58	0	2.2	0.1	50	63	0.99544	3.59	0.68	11.4	6
8.3	0.6	0.25	2.2	0.118	9	38	0.99616	3.15	0.53	9.8	5
8.5	0.18	0.51	1.75	0.071	45	88	0.99524	3.33	0.76	11.8	7
5.1	0.51	0.18	2.1	0.042	16	101	0.9924	3.46	0.87	12.9	7
6.7	0.41	0.43	2.8	0.076	22	54	0.99572	3.42	1.16	10.6	6
10.2	0.41	0.43	2.2	0.11	11	37	0.99728	3.16	0.67	10.8	5
10.6	0.36	0.57	2.3	0.087	6	20	0.99676	3.14	0.72	11.1	7
8.8	0.45	0.43	1.4	0.076	12	21	0.99551	3.21	0.75	10.2	6
8.5	0.32	0.42	2.3	0.075	12	19	0.99434	3.14	0.71	11.8	7
9	0.785	0.24	1.7	0.078	10	21	0.99692	3.29	0.67	10	5
9	0.785	0.24	1.7	0.078	10	21	0.99692	3.29	0.67	10	5
8.5	0.44	0.5	1.9	0.369	15	38	0.99634	3.01	1.1	9.4	5
9.9	0.54	0.26	2	0.111	7	60	0.99709	2.94	0.98	10.2	5
8.2	0.33	0.39	2.5	0.074	29	48	0.99528	3.32	0.88	12.4	7
6.5	0.34	0.27	2.8	0.067	8	44	0.99384	3.21	0.56	12	6
7.6	0.5	0.29	2.3	0.086	5	14	0.99502	3.32	0.62	11.5	6
9.2	0.36	0.34	1.6	0.062	5	12	0.99667	3.2	0.67	10.5	6
7.1	0.59	0	2.2	0.078	26	44	0.99522	3.42	0.68	10.8	6
9.7	0.42	0.46	2.1	0.074	5	16	0.99649	3.27	0.74	12.3	6
7.6	0.36	0.31	1.7	0.079	26	65	0.99716	3.46	0.62	9.5	6
7.6	0.36	0.31	1.7	0.079	26	65	0.99716	3.46	0.62	9.5	6
6.5	0.61	0	2.2	0.095	48	59	0.99541	3.61	0.7	11.5	6
6.5	0.88	0.03	5.6	0.079	23	47	0.99572	3.58	0.5	11.2	4
7.1	0.66	0	2.4	0.052	6	11	0.99318	3.35	0.66	12.7	7
5.6	0.915	0	2.1	0.041	17	78	0.99346	3.68	0.73	11.4	5
8.2	0.35	0.33	2.4	0.076	11	47	0.99599	3.27	0.81	11	6
8.2	0.35	0.33	2.4	0.076	11	47	0.99599	3.27	0.81	11	6
9.8	0.39	0.43	1.65	0.068	5	11	0.99478	3.19	0.46	11.4	5
10.2	0.4	0.4	2.5	0.068	41	54	0.99754	3.38	0.86	10.5	6
6.8	0.66	0.07	1.6	0.07	16	61	0.99572	3.29	0.6	9.3	5
6.7	0.64	0.23	2.1	0.08	11	119	0.99538	3.36	0.7	10.9	5
7	0.43	0.3	2	0.085	6	39	0.99346	3.33	0.46	11.9	6
6.6	0.8	0.03	7.8	0.079	6	12	0.9963	3.52	0.5	12.2	5
7	0.43	0.3	2	0.085	6	39	0.99346	3.33	0.46	11.9	6
6.7	0.64	0.23	2.1	0.08	11	119	0.99538	3.36	0.7	10.9	5
8.8	0.955	0.05	1.8	0.075	5	19	0.99616	3.3	0.44	9.6	4
9.1	0.4	0.57	4.6	0.08	6	20	0.99652	3.28	0.57	12.5	6
6.5	0.885	0	2.3	0.166	6	12	0.99551	3.56	0.51	10.8	5
7.2	0.25	0.37	2.5	0.063	11	41	0.99439	3.52	0.8	12.4	7
6.4	0.885	0	2.3	0.166	6	12	0.99551	3.56	0.51	10.8	5
7	0.745	0.12	1.8	0.114	15	64	0.99588	3.22	0.59	9.5	6
6.2	0.43	0.22	1.8	0.078	21	56	0.99633	3.52	0.6	9.5	6
7.9	0.58	0.23	2.3	0.076	23	94	0.99686	3.21	0.58	9.5	6
7.7	0.57	0.21	1.5	0.069	4	9	0.99458	3.16	0.54	9.8	6
7.7	0.26	0.26	2	0.052	19	77	0.9951	3.15	0.79	10.9	6
7.9	0.58	0.23	2.3	0.076	23	94	0.99686	3.21	0.58	9.5	6
7.7	0.57	0.21	1.5	0.069	4	9	0.99458	3.16	0.54	9.8	6
7.9	0.34	0.36	1.9	0.065	5	10	0.99419	3.27	0.54	11.2	7
8.6	0.42	0.39	1.8	0.068	6	12	0.99516	3.35	0.69	11.7	8
9.9	0.74	0.19	5.8	0.111	33	76	0.99878	3.14	0.55	9.4	5
7.2	0.36	0.46	2.1	0.074	24	44	0.99534	3.4	0.85	11	7
7.2	0.36	0.46	2.1	0.074	24	44	0.99534	3.4	0.85	11	7
7.2	0.36	0.46	2.1	0.074	24	44	0.99534	3.4	0.85	11	7
9.9	0.72	0.55	1.7	0.136	24	52	0.99752	3.35	0.94	10	5
7.2	0.36	0.46	2.1	0.074	24	44	0.99534	3.4	0.85	11	7
6.2	0.39	0.43	2	0.071	14	24	0.99428	3.45	0.87	11.2	7
6.8	0.65	0.02	2.1	0.078	8	15	0.99498	3.35	0.62	10.4	6
6.6	0.44	0.15	2.1	0.076	22	53	0.9957	3.32	0.62	9.3	5
6.8	0.65	0.02	2.1	0.078	8	15	0.99498	3.35	0.62	10.4	6
9.6	0.38	0.42	1.9	0.071	5	13	0.99659	3.15	0.75	10.5	6
10.2	0.33	0.46	1.9	0.081	6	9	0.99628	3.1	0.48	10.4	6
8.8	0.27	0.46	2.1	0.095	20	29	0.99488	3.26	0.56	11.3	6
7.9	0.57	0.31	2	0.079	10	79	0.99677	3.29	0.69	9.5	6
8.2	0.34	0.37	1.9	0.057	43	74	0.99408	3.23	0.81	12	6
8.2	0.4	0.31	1.9	0.082	8	24	0.996	3.24	0.69	10.6	6
9	0.39	0.4	1.3	0.044	25	50	0.99478	3.2	0.83	10.9	6
10.9	0.32	0.52	1.8	0.132	17	44	0.99734	3.28	0.77	11.5	6
10.9	0.32	0.52	1.8	0.132	17	44	0.99734	3.28	0.77	11.5	6
8.1	0.53	0.22	2.2	0.078	33	89	0.99678	3.26	0.46	9.6	6
10.5	0.36	0.47	2.2	0.074	9	23	0.99638	3.23	0.76	12	6
12.6	0.39	0.49	2.5	0.08	8	20	0.9992	3.07	0.82	10.3	6
9.2	0.46	0.23	2.6	0.091	18	77	0.99922	3.15	0.51	9.4	5
7.5	0.58	0.03	4.1	0.08	27	46	0.99592	3.02	0.47	9.2	5
9	0.58	0.25	2	0.104	8	21	0.99769	3.27	0.72	9.6	5
5.1	0.42	0	1.8	0.044	18	88	0.99157	3.68	0.73	13.6	7
7.6	0.43	0.29	2.1	0.075	19	66	0.99718	3.4	0.64	9.5	5
7.7	0.18	0.34	2.7	0.066	15	58	0.9947	3.37	0.78	11.8	6
7.8	0.815	0.01	2.6	0.074	48	90	0.99621	3.38	0.62	10.8	5
7.6	0.43	0.29	2.1	0.075	19	66	0.99718	3.4	0.64	9.5	5
10.2	0.23	0.37	2.2	0.057	14	36	0.99614	3.23	0.49	9.3	4
7.1	0.75	0.01	2.2	0.059	11	18	0.99242	3.39	0.4	12.8	6
6	0.33	0.32	12.9	0.054	6	113	0.99572	3.3	0.56	11.5	4
7.8	0.55	0	1.7	0.07	7	17	0.99659	3.26	0.64	9.4	6
7.1	0.75	0.01	2.2	0.059	11	18	0.99242	3.39	0.4	12.8	6
8.1	0.73	0	2.5	0.081	12	24	0.99798	3.38	0.46	9.6	4
6.5	0.67	0	4.3	0.057	11	20	0.99488	3.45	0.56	11.8	4
7.5	0.61	0.2	1.7	0.076	36	60	0.99494	3.1	0.4	9.3	5
9.8	0.37	0.39	2.5	0.079	28	65	0.99729	3.16	0.59	9.8	5
9	0.4	0.41	2	0.058	15	40	0.99414	3.22	0.6	12.2	6
8.3	0.56	0.22	2.4	0.082	10	86	0.9983	3.37	0.62	9.5	5
5.9	0.29	0.25	13.4	0.067	72	160	0.99721	3.33	0.54	10.3	6
7.4	0.55	0.19	1.8	0.082	15	34	0.99655	3.49	0.68	10.5	5
7.4	0.74	0.07	1.7	0.086	15	48	0.99502	3.12	0.48	10	5
7.4	0.55	0.19	1.8	0.082	15	34	0.99655	3.49	0.68	10.5	5
6.9	0.41	0.33	2.2	0.081	22	36	0.9949	3.41	0.75	11.1	6
7.1	0.6	0.01	2.3	0.079	24	37	0.99514	3.4	0.61	10.9	6
7.1	0.6	0.01	2.3	0.079	24	37	0.99514	3.4	0.61	10.9	6
7.5	0.58	0.14	2.2	0.077	27	60	0.9963	3.28	0.59	9.8	5
7.1	0.72	0	1.8	0.123	6	14	0.99627	3.45	0.58	9.8	5
7.9	0.66	0	1.4	0.096	6	13	0.99569	3.43	0.58	9.5	5
7.8	0.7	0.06	1.9	0.079	20	35	0.99628	3.4	0.69	10.9	5
6.1	0.64	0.02	2.4	0.069	26	46	0.99358	3.47	0.45	11	5
7.5	0.59	0.22	1.8	0.082	43	60	0.99499	3.1	0.42	9.2	5
7	0.58	0.28	4.8	0.085	12	69	0.99633	3.32	0.7	11	6
6.8	0.64	0	2.7	0.123	15	33	0.99538	3.44	0.63	11.3	6
6.8	0.64	0	2.7	0.123	15	33	0.99538	3.44	0.63	11.3	6
8.6	0.635	0.68	1.8	0.403	19	56	0.99632	3.02	1.15	9.3	5
6.3	1.02	0	2	0.083	17	24	0.99437	3.59	0.55	11.2	4
9.8	0.45	0.38	2.5	0.081	34	66	0.99726	3.15	0.58	9.8	5
8.2	0.78	0	2.2	0.089	13	26	0.9978	3.37	0.46	9.6	4
8.5	0.37	0.32	1.8	0.066	26	51	0.99456	3.38	0.72	11.8	6
7.2	0.57	0.05	2.3	0.081	16	36	0.99564	3.38	0.6	10.3	6
7.2	0.57	0.05	2.3	0.081	16	36	0.99564	3.38	0.6	10.3	6
10.4	0.43	0.5	2.3	0.068	13	19	0.996	3.1	0.87	11.4	6
6.9	0.41	0.31	2	0.079	21	51	0.99668	3.47	0.55	9.5	6
5.5	0.49	0.03	1.8	0.044	28	87	0.9908	3.5	0.82	14	8
5	0.38	0.01	1.6	0.048	26	60	0.99084	3.7	0.75	14	6
7.3	0.44	0.2	1.6	0.049	24	64	0.9935	3.38	0.57	11.7	6
5.9	0.46	0	1.9	0.077	25	44	0.99385	3.5	0.53	11.2	5
7.5	0.58	0.2	2	0.073	34	44	0.99494	3.1	0.43	9.3	5
7.8	0.58	0.13	2.1	0.102	17	36	0.9944	3.24	0.53	11.2	6
8	0.715	0.22	2.3	0.075	13	81	0.99688	3.24	0.54	9.5	6
8.5	0.4	0.4	6.3	0.05	3	10	0.99566	3.28	0.56	12	4
7	0.69	0	1.9	0.114	3	10	0.99636	3.35	0.6	9.7	6
8	0.715	0.22	2.3	0.075	13	81	0.99688	3.24	0.54	9.5	6
9.8	0.3	0.39	1.7	0.062	3	9	0.9948	3.14	0.57	11.5	7
7.1	0.46	0.2	1.9	0.077	28	54	0.9956	3.37	0.64	10.4	6
7.1	0.46	0.2	1.9	0.077	28	54	0.9956	3.37	0.64	10.4	6
7.9	0.765	0	2	0.084	9	22	0.99619	3.33	0.68	10.9	6
8.7	0.63	0.28	2.7	0.096	17	69	0.99734	3.26	0.63	10.2	6
7	0.42	0.19	2.3	0.071	18	36	0.99476	3.39	0.56	10.9	5
11.3	0.37	0.5	1.8	0.09	20	47	0.99734	3.15	0.57	10.5	5
7.1	0.16	0.44	2.5	0.068	17	31	0.99328	3.35	0.54	12.4	6
8	0.6	0.08	2.6	0.056	3	7	0.99286	3.22	0.37	13	5
7	0.6	0.3	4.5	0.068	20	110	0.99914	3.3	1.17	10.2	5
7	0.6	0.3	4.5	0.068	20	110	0.99914	3.3	1.17	10.2	5
7.6	0.74	0	1.9	0.1	6	12	0.99521	3.36	0.59	11	5
8.2	0.635	0.1	2.1	0.073	25	60	0.99638	3.29	0.75	10.9	6
5.9	0.395	0.13	2.4	0.056	14	28	0.99362	3.62	0.67	12.4	6
7.5	0.755	0	1.9	0.084	6	12	0.99672	3.34	0.49	9.7	4
8.2	0.635	0.1	2.1	0.073	25	60	0.99638	3.29	0.75	10.9	6
6.6	0.63	0	4.3	0.093	51	77.5	0.99558	3.2	0.45	9.5	5
6.6	0.63	0	4.3	0.093	51	77.5	0.99558	3.2	0.45	9.5	5
7.2	0.53	0.14	2.1	0.064	15	29	0.99323	3.35	0.61	12.1	6
5.7	0.6	0	1.4	0.063	11	18	0.99191	3.45	0.56	12.2	6
7.6	1.58	0	2.1	0.137	5	9	0.99476	3.5	0.4	10.9	3
5.2	0.645	0	2.15	0.08	15	28	0.99444	3.78	0.61	12.5	6
6.7	0.86	0.07	2	0.1	20	57	0.99598	3.6	0.74	11.7	6
9.1	0.37	0.32	2.1	0.064	4	15	0.99576	3.3	0.8	11.2	6
8	0.28	0.44	1.8	0.081	28	68	0.99501	3.36	0.66	11.2	5
7.6	0.79	0.21	2.3	0.087	21	68	0.9955	3.12	0.44	9.2	5
7.5	0.61	0.26	1.9	0.073	24	88	0.99612	3.3	0.53	9.8	5
9.7	0.69	0.32	2.5	0.088	22	91	0.9979	3.29	0.62	10.1	5
6.8	0.68	0.09	3.9	0.068	15	29	0.99524	3.41	0.52	11.1	4
9.7	0.69	0.32	2.5	0.088	22	91	0.9979	3.29	0.62	10.1	5
7	0.62	0.1	1.4	0.071	27	63	0.996	3.28	0.61	9.2	5
7.5	0.61	0.26	1.9	0.073	24	88	0.99612	3.3	0.53	9.8	5
6.5	0.51	0.15	3	0.064	12	27	0.9929	3.33	0.59	12.8	6
8	1.18	0.21	1.9	0.083	14	41	0.99532	3.34	0.47	10.5	5
7	0.36	0.21	2.3	0.086	20	65	0.99558	3.4	0.54	10.1	6
7	0.36	0.21	2.4	0.086	24	69	0.99556	3.4	0.53	10.1	6
7.5	0.63	0.27	2	0.083	17	91	0.99616	3.26	0.58	9.8	6
5.4	0.74	0	1.2	0.041	16	46	0.99258	4.01	0.59	12.5	6
9.9	0.44	0.46	2.2	0.091	10	41	0.99638	3.18	0.69	11.9	6
7.5	0.63	0.27	2	0.083	17	91	0.99616	3.26	0.58	9.8	6
9.1	0.76	0.68	1.7	0.414	18	64	0.99652	2.9	1.33	9.1	6
9.7	0.66	0.34	2.6	0.094	12	88	0.99796	3.26	0.66	10.1	5
5	0.74	0	1.2	0.041	16	46	0.99258	4.01	0.59	12.5	6
9.1	0.34	0.42	1.8	0.058	9	18	0.99392	3.18	0.55	11.4	5
9.1	0.36	0.39	1.8	0.06	21	55	0.99495	3.18	0.82	11	7
6.7	0.46	0.24	1.7	0.077	18	34	0.9948	3.39	0.6	10.6	6
6.7	0.46	0.24	1.7	0.077	18	34	0.9948	3.39	0.6	10.6	6
6.7	0.46	0.24	1.7	0.077	18	34	0.9948	3.39	0.6	10.6	6
6.7	0.46	0.24	1.7	0.077	18	34	0.9948	3.39	0.6	10.6	6
6.5	0.52	0.11	1.8	0.073	13	38	0.9955	3.34	0.52	9.3	5
7.4	0.6	0.26	2.1	0.083	17	91	0.99616	3.29	0.56	9.8	6
7.4	0.6	0.26	2.1	0.083	17	91	0.99616	3.29	0.56	9.8	6
7.8	0.87	0.26	3.8	0.107	31	67	0.99668	3.26	0.46	9.2	5
8.4	0.39	0.1	1.7	0.075	6	25	0.99581	3.09	0.43	9.7	6
9.1	0.775	0.22	2.2	0.079	12	48	0.9976	3.18	0.51	9.6	5
7.2	0.835	0	2	0.166	4	11	0.99608	3.39	0.52	10	5
6.6	0.58	0.02	2.4	0.069	19	40	0.99387	3.38	0.66	12.6	6
6	0.5	0	1.4	0.057	15	26	0.99448	3.36	0.45	9.5	5
6	0.5	0	1.4	0.057	15	26	0.99448	3.36	0.45	9.5	5
6	0.5	0	1.4	0.057	15	26	0.99448	3.36	0.45	9.5	5
7.5	0.51	0.02	1.7	0.084	13	31	0.99538	3.36	0.54	10.5	6
7.5	0.51	0.02	1.7	0.084	13	31	0.99538	3.36	0.54	10.5	6
7.5	0.51	0.02	1.7	0.084	13	31	0.99538	3.36	0.54	10.5	6
7.6	0.54	0.02	1.7	0.085	17	31	0.99589	3.37	0.51	10.4	6
7.5	0.51	0.02	1.7	0.084	13	31	0.99538	3.36	0.54	10.5	6
11.5	0.42	0.48	2.6	0.077	8	20	0.99852	3.09	0.53	11	5
8.2	0.44	0.24	2.3	0.063	10	28	0.99613	3.25	0.53	10.2	6
6.1	0.59	0.01	2.1	0.056	5	13	0.99472	3.52	0.56	11.4	5
7.2	0.655	0.03	1.8	0.078	7	12	0.99587	3.34	0.39	9.5	5
7.2	0.655	0.03	1.8	0.078	7	12	0.99587	3.34	0.39	9.5	5
6.9	0.57	0	2.8	0.081	21	41	0.99518	3.41	0.52	10.8	5
9	0.6	0.29	2	0.069	32	73	0.99654	3.34	0.57	10	5
7.2	0.62	0.01	2.3	0.065	8	46	0.99332	3.32	0.51	11.8	6
7.6	0.645	0.03	1.9	0.086	14	57	0.9969	3.37	0.46	10.3	5
7.6	0.645	0.03	1.9	0.086	14	57	0.9969	3.37	0.46	10.3	5
7.2	0.58	0.03	2.3	0.077	7	28	0.99568	3.35	0.52	10	5
6.1	0.32	0.25	1.8	0.086	5	32	0.99464	3.36	0.44	10.1	5
6.1	0.34	0.25	1.8	0.084	4	28	0.99464	3.36	0.44	10.1	5
7.3	0.43	0.24	2.5	0.078	27	67	0.99648	3.6	0.59	11.1	6
7.4	0.64	0.17	5.4	0.168	52	98	0.99736	3.28	0.5	9.5	5
11.6	0.475	0.4	1.4	0.091	6	28	0.99704	3.07	0.65	10.0333333333333	6
9.2	0.54	0.31	2.3	0.112	11	38	0.99699	3.24	0.56	10.9	5
8.3	0.85	0.14	2.5	0.093	13	54	0.99724	3.36	0.54	10.1	5
11.6	0.475	0.4	1.4	0.091	6	28	0.99704	3.07	0.65	10.0333333333333	6
8	0.83	0.27	2	0.08	11	63	0.99652	3.29	0.48	9.8	4
7.2	0.605	0.02	1.9	0.096	10	31	0.995	3.46	0.53	11.8	6
7.8	0.5	0.09	2.2	0.115	10	42	0.9971	3.18	0.62	9.5	5
7.3	0.74	0.08	1.7	0.094	10	45	0.99576	3.24	0.5	9.8	5
6.9	0.54	0.3	2.2	0.088	9	105	0.99725	3.25	1.18	10.5	6
8	0.77	0.32	2.1	0.079	16	74	0.99656	3.27	0.5	9.8	6
6.6	0.61	0	1.6	0.069	4	8	0.99396	3.33	0.37	10.4	4
8.7	0.78	0.51	1.7	0.415	12	66	0.99623	3	1.17	9.2	5
7.5	0.58	0.56	3.1	0.153	5	14	0.99476	3.21	1.03	11.6	6
8.7	0.78	0.51	1.7	0.415	12	66	0.99623	3	1.17	9.2	5
7.7	0.75	0.27	3.8	0.11	34	89	0.99664	3.24	0.45	9.3	5
6.8	0.815	0	1.2	0.267	16	29	0.99471	3.32	0.51	9.8	3
7.2	0.56	0.26	2	0.083	13	100	0.99586	3.26	0.52	9.9	5
8.2	0.885	0.2	1.4	0.086	7	31	0.9946	3.11	0.46	10	5
5.2	0.49	0.26	2.3	0.09	23	74	0.9953	3.71	0.62	12.2	6
7.2	0.45	0.15	2	0.078	10	28	0.99609	3.29	0.51	9.9	6
7.5	0.57	0.02	2.6	0.077	11	35	0.99557	3.36	0.62	10.8	6
7.5	0.57	0.02	2.6	0.077	11	35	0.99557	3.36	0.62	10.8	6
6.8	0.83	0.09	1.8	0.074	4	25	0.99534	3.38	0.45	9.6	5
8	0.6	0.22	2.1	0.08	25	105	0.99613	3.3	0.49	9.9	5
8	0.6	0.22	2.1	0.08	25	105	0.99613	3.3	0.49	9.9	5
7.1	0.755	0.15	1.8	0.107	20	84	0.99593	3.19	0.5	9.5	5
8	0.81	0.25	3.4	0.076	34	85	0.99668	3.19	0.42	9.2	5
7.4	0.64	0.07	1.8	0.1	8	23	0.9961	3.3	0.58	9.6	5
7.4	0.64	0.07	1.8	0.1	8	23	0.9961	3.3	0.58	9.6	5
6.6	0.64	0.31	6.1	0.083	7	49	0.99718	3.35	0.68	10.3	5
6.7	0.48	0.02	2.2	0.08	36	111	0.99524	3.1	0.53	9.7	5
6	0.49	0	2.3	0.068	15	33	0.99292	3.58	0.59	12.5	6
8	0.64	0.22	2.4	0.094	5	33	0.99612	3.37	0.58	11	5
7.1	0.62	0.06	1.3	0.07	5	12	0.9942	3.17	0.48	9.8	5
8	0.52	0.25	2	0.078	19	59	0.99612	3.3	0.48	10.2	5
6.4	0.57	0.14	3.9	0.07	27	73	0.99669	3.32	0.48	9.2	5
8.6	0.685	0.1	1.6	0.092	3	12	0.99745	3.31	0.65	9.55	6
8.7	0.675	0.1	1.6	0.09	4	11	0.99745	3.31	0.65	9.55	5
7.3	0.59	0.26	2	0.08	17	104	0.99584	3.28	0.52	9.9	5
7	0.6	0.12	2.2	0.083	13	28	0.9966	3.52	0.62	10.2	7
7.2	0.67	0	2.2	0.068	10	24	0.9956	3.42	0.72	11.1	6
7.9	0.69	0.21	2.1	0.08	33	141	0.9962	3.25	0.51	9.9	5
7.9	0.69	0.21	2.1	0.08	33	141	0.9962	3.25	0.51	9.9	5
7.6	0.3	0.42	2	0.052	6	24	0.9963	3.44	0.82	11.9	6
7.2	0.33	0.33	1.7	0.061	3	13	0.996	3.23	1.1	10	8
8	0.5	0.39	2.6	0.082	12	46	0.9985	3.43	0.62	10.7	6
7.7	0.28	0.3	2	0.062	18	34	0.9952	3.28	0.9	11.3	7
8.2	0.24	0.34	5.1	0.062	8	22	0.9974	3.22	0.94	10.9	6
6	0.51	0	2.1	0.064	40	54	0.995	3.54	0.93	10.7	6
8.1	0.29	0.36	2.2	0.048	35	53	0.995	3.27	1.01	12.4	7
6	0.51	0	2.1	0.064	40	54	0.995	3.54	0.93	10.7	6
6.6	0.96	0	1.8	0.082	5	16	0.9936	3.5	0.44	11.9	6
6.4	0.47	0.4	2.4	0.071	8	19	0.9963	3.56	0.73	10.6	6
8.2	0.24	0.34	5.1	0.062	8	22	0.9974	3.22	0.94	10.9	6
9.9	0.57	0.25	2	0.104	12	89	0.9963	3.04	0.9	10.1	5
10	0.32	0.59	2.2	0.077	3	15	0.9994	3.2	0.78	9.6	5
6.2	0.58	0	1.6	0.065	8	18	0.9966	3.56	0.84	9.4	5
10	0.32	0.59	2.2	0.077	3	15	0.9994	3.2	0.78	9.6	5
7.3	0.34	0.33	2.5	0.064	21	37	0.9952	3.35	0.77	12.1	7
7.8	0.53	0.01	1.6	0.077	3	19	0.995	3.16	0.46	9.8	5
7.7	0.64	0.21	2.2	0.077	32	133	0.9956	3.27	0.45	9.9	5
7.8	0.53	0.01	1.6	0.077	3	19	0.995	3.16	0.46	9.8	5
7.5	0.4	0.18	1.6	0.079	24	58	0.9965	3.34	0.58	9.4	5
7	0.54	0	2.1	0.079	39	55	0.9956	3.39	0.84	11.4	6
6.4	0.53	0.09	3.9	0.123	14	31	0.9968	3.5	0.67	11	4
8.3	0.26	0.37	1.4	0.076	8	23	0.9974	3.26	0.7	9.6	6
8.3	0.26	0.37	1.4	0.076	8	23	0.9974	3.26	0.7	9.6	6
7.7	0.23	0.37	1.8	0.046	23	60	0.9971	3.41	0.71	12.1	6
7.6	0.41	0.33	2.5	0.078	6	23	0.9957	3.3	0.58	11.2	5
7.8	0.64	0	1.9	0.072	27	55	0.9962	3.31	0.63	11	5
7.9	0.18	0.4	2.2	0.049	38	67	0.996	3.33	0.93	11.3	5
7.4	0.41	0.24	1.8	0.066	18	47	0.9956	3.37	0.62	10.4	5
7.6	0.43	0.31	2.1	0.069	13	74	0.9958	3.26	0.54	9.9	6
5.9	0.44	0	1.6	0.042	3	11	0.9944	3.48	0.85	11.7	6
6.1	0.4	0.16	1.8	0.069	11	25	0.9955	3.42	0.74	10.1	7
10.2	0.54	0.37	15.4	0.214	55	95	1.00369	3.18	0.77	9	6
10.2	0.54	0.37	15.4	0.214	55	95	1.00369	3.18	0.77	9	6
10	0.38	0.38	1.6	0.169	27	90	0.99914	3.15	0.65	8.5	5
6.8	0.915	0.29	4.8	0.07	15	39	0.99577	3.53	0.54	11.1	5
7	0.59	0	1.7	0.052	3	8	0.996	3.41	0.47	10.3	5
7.3	0.67	0.02	2.2	0.072	31	92	0.99566	3.32	0.68	11.0666666666667	6
7.2	0.37	0.32	2	0.062	15	28	0.9947	3.23	0.73	11.3	7
7.4	0.785	0.19	5.2	0.094	19	98	0.99713	3.16	0.52	9.56666666666667	6
6.9	0.63	0.02	1.9	0.078	18	30	0.99712	3.4	0.75	9.8	5
6.9	0.58	0.2	1.75	0.058	8	22	0.99322	3.38	0.49	11.7	5
7.3	0.67	0.02	2.2	0.072	31	92	0.99566	3.32	0.68	11.1	6
7.4	0.785	0.19	5.2	0.094	19	98	0.99713	3.16	0.52	9.6	6
6.9	0.63	0.02	1.9	0.078	18	30	0.99712	3.4	0.75	9.8	5
6.8	0.67	0	1.9	0.08	22	39	0.99701	3.4	0.74	9.7	5
6.9	0.58	0.01	1.9	0.08	40	54	0.99683	3.4	0.73	9.7	5
7.2	0.38	0.31	2	0.056	15	29	0.99472	3.23	0.76	11.3	8
7.2	0.37	0.32	2	0.062	15	28	0.9947	3.23	0.73	11.3	7
7.8	0.32	0.44	2.7	0.104	8	17	0.99732	3.33	0.78	11	7
6.6	0.58	0.02	2	0.062	37	53	0.99374	3.35	0.76	11.6	7
7.6	0.49	0.33	1.9	0.074	27	85	0.99706	3.41	0.58	9	5
11.7	0.45	0.63	2.2	0.073	7	23	0.99974	3.21	0.69	10.9	6
6.5	0.9	0	1.6	0.052	9	17	0.99467	3.5	0.63	10.9	6
6	0.54	0.06	1.8	0.05	38	89	0.99236	3.3	0.5	10.55	6
7.6	0.49	0.33	1.9	0.074	27	85	0.99706	3.41	0.58	9	5
8.4	0.29	0.4	1.7	0.067	8	20	0.99603	3.39	0.6	10.5	5
7.9	0.2	0.35	1.7	0.054	7	15	0.99458	3.32	0.8	11.9	7
6.4	0.42	0.09	2.3	0.054	34	64	0.99724	3.41	0.68	10.4	6
6.2	0.785	0	2.1	0.06	6	13	0.99664	3.59	0.61	10	4
6.8	0.64	0.03	2.3	0.075	14	31	0.99545	3.36	0.58	10.4	6
6.9	0.63	0.01	2.4	0.076	14	39	0.99522	3.34	0.53	10.8	6
6.8	0.59	0.1	1.7	0.063	34	53	0.9958	3.41	0.67	9.7	5
6.8	0.59	0.1	1.7	0.063	34	53	0.9958	3.41	0.67	9.7	5
7.3	0.48	0.32	2.1	0.062	31	54	0.99728	3.3	0.65	10	7
6.7	1.04	0.08	2.3	0.067	19	32	0.99648	3.52	0.57	11	4
7.3	0.48	0.32	2.1	0.062	31	54	0.99728	3.3	0.65	10	7
7.3	0.98	0.05	2.1	0.061	20	49	0.99705	3.31	0.55	9.7	3
10	0.69	0.11	1.4	0.084	8	24	0.99578	2.88	0.47	9.7	5
6.7	0.7	0.08	3.75	0.067	8	16	0.99334	3.43	0.52	12.6	5
7.6	0.35	0.6	2.6	0.073	23	44	0.99656	3.38	0.79	11.1	6
6.1	0.6	0.08	1.8	0.071	14	45	0.99336	3.38	0.54	11	5
9.9	0.5	0.5	13.8	0.205	48	82	1.00242	3.16	0.75	8.8	5
5.3	0.47	0.11	2.2	0.048	16	89	0.99182	3.54	0.88	13.5666666666667	7
9.9	0.5	0.5	13.8	0.205	48	82	1.00242	3.16	0.75	8.8	5
5.3	0.47	0.11	2.2	0.048	16	89	0.99182	3.54	0.88	13.6	7
7.1	0.875	0.05	5.7	0.082	3	14	0.99808	3.4	0.52	10.2	3
8.2	0.28	0.6	3	0.104	10	22	0.99828	3.39	0.68	10.6	5
5.6	0.62	0.03	1.5	0.08	6	13	0.99498	3.66	0.62	10.1	4
8.2	0.28	0.6	3	0.104	10	22	0.99828	3.39	0.68	10.6	5
7.2	0.58	0.54	2.1	0.114	3	9	0.99719	3.33	0.57	10.3	4
8.1	0.33	0.44	1.5	0.042	6	12	0.99542	3.35	0.61	10.7	5
6.8	0.91	0.06	2	0.06	4	11	0.99592	3.53	0.64	10.9	4
7	0.655	0.16	2.1	0.074	8	25	0.99606	3.37	0.55	9.7	5
6.8	0.68	0.21	2.1	0.07	9	23	0.99546	3.38	0.6	10.3	5
6	0.64	0.05	1.9	0.066	9	17	0.99496	3.52	0.78	10.6	5
5.6	0.54	0.04	1.7	0.049	5	13	0.9942	3.72	0.58	11.4	5
6.2	0.57	0.1	2.1	0.048	4	11	0.99448	3.44	0.76	10.8	6
7.1	0.22	0.49	1.8	0.039	8	18	0.99344	3.39	0.56	12.4	6
5.6	0.54	0.04	1.7	0.049	5	13	0.9942	3.72	0.58	11.4	5
6.2	0.65	0.06	1.6	0.05	6	18	0.99348	3.57	0.54	11.95	5
7.7	0.54	0.26	1.9	0.089	23	147	0.99636	3.26	0.59	9.7	5
6.4	0.31	0.09	1.4	0.066	15	28	0.99459	3.42	0.7	10	7
7	0.43	0.02	1.9	0.08	15	28	0.99492	3.35	0.81	10.6	6
7.7	0.54	0.26	1.9	0.089	23	147	0.99636	3.26	0.59	9.7	5
6.9	0.74	0.03	2.3	0.054	7	16	0.99508	3.45	0.63	11.5	6
6.6	0.895	0.04	2.3	0.068	7	13	0.99582	3.53	0.58	10.8	6
6.9	0.74	0.03	2.3	0.054	7	16	0.99508	3.45	0.63	11.5	6
7.5	0.725	0.04	1.5	0.076	8	15	0.99508	3.26	0.53	9.6	5
7.8	0.82	0.29	4.3	0.083	21	64	0.99642	3.16	0.53	9.4	5
7.3	0.585	0.18	2.4	0.078	15	60	0.99638	3.31	0.54	9.8	5
6.2	0.44	0.39	2.5	0.077	6	14	0.99555	3.51	0.69	11	6
7.5	0.38	0.57	2.3	0.106	5	12	0.99605	3.36	0.55	11.4	6
6.7	0.76	0.02	1.8	0.078	6	12	0.996	3.55	0.63	9.95	3
6.8	0.81	0.05	2	0.07	6	14	0.99562	3.51	0.66	10.8	6
7.5	0.38	0.57	2.3	0.106	5	12	0.99605	3.36	0.55	11.4	6
7.1	0.27	0.6	2.1	0.074	17	25	0.99814	3.38	0.72	10.6	6
7.9	0.18	0.4	1.8	0.062	7	20	0.9941	3.28	0.7	11.1	5
6.4	0.36	0.21	2.2	0.047	26	48	0.99661	3.47	0.77	9.7	6
7.1	0.69	0.04	2.1	0.068	19	27	0.99712	3.44	0.67	9.8	5
6.4	0.79	0.04	2.2	0.061	11	17	0.99588	3.53	0.65	10.4	6
6.4	0.56	0.15	1.8	0.078	17	65	0.99294	3.33	0.6	10.5	6
6.9	0.84	0.21	4.1	0.074	16	65	0.99842	3.53	0.72	9.23333333333333	6
6.9	0.84	0.21	4.1	0.074	16	65	0.99842	3.53	0.72	9.25	6
6.1	0.32	0.25	2.3	0.071	23	58	0.99633	3.42	0.97	10.6	5
6.5	0.53	0.06	2	0.063	29	44	0.99489	3.38	0.83	10.3	6
7.4	0.47	0.46	2.2	0.114	7	20	0.99647	3.32	0.63	10.5	5
6.6	0.7	0.08	2.6	0.106	14	27	0.99665	3.44	0.58	10.2	5
6.5	0.53	0.06	2	0.063	29	44	0.99489	3.38	0.83	10.3	6
6.9	0.48	0.2	1.9	0.082	9	23	0.99585	3.39	0.43	9.05	4
6.1	0.32	0.25	2.3	0.071	23	58	0.99633	3.42	0.97	10.6	5
6.8	0.48	0.25	2	0.076	29	61	0.9953	3.34	0.6	10.4	5
6	0.42	0.19	2	0.075	22	47	0.99522	3.39	0.78	10	6
6.7	0.48	0.08	2.1	0.064	18	34	0.99552	3.33	0.64	9.7	5
6.8	0.47	0.08	2.2	0.064	18	38	0.99553	3.3	0.65	9.6	6
7.1	0.53	0.07	1.7	0.071	15	24	0.9951	3.29	0.66	10.8	6
7.9	0.29	0.49	2.2	0.096	21	59	0.99714	3.31	0.67	10.1	6
7.1	0.69	0.08	2.1	0.063	42	52	0.99608	3.42	0.6	10.2	6
6.6	0.44	0.09	2.2	0.063	9	18	0.99444	3.42	0.69	11.3	6
6.1	0.705	0.1	2.8	0.081	13	28	0.99631	3.6	0.66	10.2	5
7.2	0.53	0.13	2	0.058	18	22	0.99573	3.21	0.68	9.9	6
8	0.39	0.3	1.9	0.074	32	84	0.99717	3.39	0.61	9	5
6.6	0.56	0.14	2.4	0.064	13	29	0.99397	3.42	0.62	11.7	7
7	0.55	0.13	2.2	0.075	15	35	0.9959	3.36	0.59	9.7	6
6.1	0.53	0.08	1.9	0.077	24	45	0.99528	3.6	0.68	10.3	6
5.4	0.58	0.08	1.9	0.059	20	31	0.99484	3.5	0.64	10.2	6
6.2	0.64	0.09	2.5	0.081	15	26	0.99538	3.57	0.63	12	5
7.2	0.39	0.32	1.8	0.065	34	60	0.99714	3.46	0.78	9.9	5
6.2	0.52	0.08	4.4	0.071	11	32	0.99646	3.56	0.63	11.6	6
7.4	0.25	0.29	2.2	0.054	19	49	0.99666	3.4	0.76	10.9	7
6.7	0.855	0.02	1.9	0.064	29	38	0.99472	3.3	0.56	10.75	6
11.1	0.44	0.42	2.2	0.064	14	19	0.99758	3.25	0.57	10.4	6
8.4	0.37	0.43	2.3	0.063	12	19	0.9955	3.17	0.81	11.2	7
6.5	0.63	0.33	1.8	0.059	16	28	0.99531	3.36	0.64	10.1	6
7	0.57	0.02	2	0.072	17	26	0.99575	3.36	0.61	10.2	5
6.3	0.6	0.1	1.6	0.048	12	26	0.99306	3.55	0.51	12.1	5
11.2	0.4	0.5	2	0.099	19	50	0.99783	3.1	0.58	10.4	5
7.4	0.36	0.3	1.8	0.074	17	24	0.99419	3.24	0.7	11.4	8
7.1	0.68	0	2.3	0.087	17	26	0.99783	3.45	0.53	9.5	5
7.1	0.67	0	2.3	0.083	18	27	0.99768	3.44	0.54	9.4	5
6.3	0.68	0.01	3.7	0.103	32	54	0.99586	3.51	0.66	11.3	6
7.3	0.735	0	2.2	0.08	18	28	0.99765	3.41	0.6	9.4	5
6.6	0.855	0.02	2.4	0.062	15	23	0.99627	3.54	0.6	11	6
7	0.56	0.17	1.7	0.065	15	24	0.99514	3.44	0.68	10.55	7
6.6	0.88	0.04	2.2	0.066	12	20	0.99636	3.53	0.56	9.9	5
6.6	0.855	0.02	2.4	0.062	15	23	0.99627	3.54	0.6	11	6
6.9	0.63	0.33	6.7	0.235	66	115	0.99787	3.22	0.56	9.5	5
7.8	0.6	0.26	2	0.08	31	131	0.99622	3.21	0.52	9.9	5
7.8	0.6	0.26	2	0.08	31	131	0.99622	3.21	0.52	9.9	5
7.8	0.6	0.26	2	0.08	31	131	0.99622	3.21	0.52	9.9	5
7.2	0.695	0.13	2	0.076	12	20	0.99546	3.29	0.54	10.1	5
7.2	0.695	0.13	2	0.076	12	20	0.99546	3.29	0.54	10.1	5
7.2	0.695	0.13	2	0.076	12	20	0.99546	3.29	0.54	10.1	5
6.7	0.67	0.02	1.9	0.061	26	42	0.99489	3.39	0.82	10.9	6
6.7	0.16	0.64	2.1	0.059	24	52	0.99494	3.34	0.71	11.2	6
7.2	0.695	0.13	2	0.076	12	20	0.99546	3.29	0.54	10.1	5
7	0.56	0.13	1.6	0.077	25	42	0.99629	3.34	0.59	9.2	5
6.2	0.51	0.14	1.9	0.056	15	34	0.99396	3.48	0.57	11.5	6
6.4	0.36	0.53	2.2	0.23	19	35	0.9934	3.37	0.93	12.4	6
6.4	0.38	0.14	2.2	0.038	15	25	0.99514	3.44	0.65	11.1	6
7.3	0.69	0.32	2.2	0.069	35	104	0.99632	3.33	0.51	9.5	5
6	0.58	0.2	2.4	0.075	15	50	0.99467	3.58	0.67	12.5	6
5.6	0.31	0.78	13.9	0.074	23	92	0.99677	3.39	0.48	10.5	6
7.5	0.52	0.4	2.2	0.06	12	20	0.99474	3.26	0.64	11.8	6
8	0.3	0.63	1.6	0.081	16	29	0.99588	3.3	0.78	10.8	6
6.2	0.7	0.15	5.1	0.076	13	27	0.99622	3.54	0.6	11.9	6
6.8	0.67	0.15	1.8	0.118	13	20	0.9954	3.42	0.67	11.3	6
6.2	0.56	0.09	1.7	0.053	24	32	0.99402	3.54	0.6	11.3	5
7.4	0.35	0.33	2.4	0.068	9	26	0.9947	3.36	0.6	11.9	6
6.2	0.56	0.09	1.7	0.053	24	32	0.99402	3.54	0.6	11.3	5
6.1	0.715	0.1	2.6	0.053	13	27	0.99362	3.57	0.5	11.9	5
6.2	0.46	0.29	2.1	0.074	32	98	0.99578	3.33	0.62	9.8	5
6.7	0.32	0.44	2.4	0.061	24	34	0.99484	3.29	0.8	11.6	7
7.2	0.39	0.44	2.6	0.066	22	48	0.99494	3.3	0.84	11.5	6
7.5	0.31	0.41	2.4	0.065	34	60	0.99492	3.34	0.85	11.4	6
5.8	0.61	0.11	1.8	0.066	18	28	0.99483	3.55	0.66	10.9	6
7.2	0.66	0.33	2.5	0.068	34	102	0.99414	3.27	0.78	12.8	6
6.6	0.725	0.2	7.8	0.073	29	79	0.9977	3.29	0.54	9.2	5
6.3	0.55	0.15	1.8	0.077	26	35	0.99314	3.32	0.82	11.6	6
5.4	0.74	0.09	1.7	0.089	16	26	0.99402	3.67	0.56	11.6	6
6.3	0.51	0.13	2.3	0.076	29	40	0.99574	3.42	0.75	11	6
6.8	0.62	0.08	1.9	0.068	28	38	0.99651	3.42	0.82	9.5	6
6.2	0.6	0.08	2	0.09	32	44	0.9949	3.45	0.58	10.5	5
5.9	0.55	0.1	2.2	0.062	39	51	0.99512	3.52	0.76	11.2	6
6.3	0.51	0.13	2.3	0.076	29	40	0.99574	3.42	0.75	11	6
5.9	0.645	0.12	2	0.075	32	44	0.99547	3.57	0.71	10.2	5
6	0.31	0.47	3.6	0.067	18	42	0.99549	3.39	0.66	11	6
