# Supplementary material
Source: ML conference proceedings conference paper supplement (https://proceedings.neurips.cc/paper_files/paper/2020/hash/aab085461de182608ee9f607f3f7d18f-Abstract.html)
Supplement: Supplementary file 16 [file aab085461de182608ee9f607f3f7d18f-Supplemental.zip › supplemental/evidential_regression/environment.yml]

name: evidence
channels:
  - plotly
  - conda-forge
  - anaconda
  - defaults
dependencies:
  - _libgcc_mutex=0.1=main
  - _tflow_select=2.1.0=gpu
  - absl-py=0.9.0=py37_0
  - astor=0.8.0=py37_0
  - attrs=19.3.0=py_0
  - blas=1.0=mkl
  - blinker=1.4=py37_0
  - bzip2=1.0.8=h7b6447c_0
  - c-ares=1.15.0=h7b6447c_1001
  - ca-certificates=2020.1.1=0
  - cachetools=3.1.1=py_0
  - cairo=1.16.0=h18b612c_1001
  - certifi=2020.4.5.1=py37_0
  - cffi=1.14.0=py37he30daa8_1
  - cftime=1.1.2=py37heb32a55_0
  - chardet=3.0.4=py37_1003
  - click=7.1.2=py_0
  - cryptography=2.9.2=py37h1ba5d50_0
  - cudatoolkit=10.1.243=h6bb024c_0
  - cudnn=7.6.5=cuda10.1_0
  - cupti=10.1.168=0
  - curl=7.69.1=hbc83047_0
  - cycler=0.10.0=py37_0
  - dbus=1.13.14=hb2f20db_0
  - decorator=4.4.2=py_0
  - dill=0.3.1.1=py37_0
  - expat=2.2.6=he6710b0_0
  - ffmpeg=4.1.3=h167e202_0
  - fontconfig=2.13.1=he4413a7_1000
  - freetype=2.9.1=h8a8886c_1
  - future=0.18.2=py37_0
  - giflib=5.1.4=h14c3975_1
  - glib=2.63.1=h3eb4bd4_1
  - gmp=6.1.2=h6c8ec71_1
  - gnutls=3.6.5=h71b1129_1002
  - google-auth=1.14.1=py_0
  - google-auth-oauthlib=0.4.1=py_2
  - google-pasta=0.2.0=py_0
  - googleapis-common-protos=1.51.0=py37_2
  - graphite2=1.3.13=h23475e2_0
  - grpcio=1.27.2=py37hf8bcb03_0
  - gst-plugins-base=1.14.0=hbbd80ab_1
  - gstreamer=1.14.0=hb31296c_0
  - h5py=2.10.0=py37h7918eee_0
  - harfbuzz=2.4.0=h37c48d4_1
  - hdf4=4.2.13=h3ca952b_2
  - hdf5=1.10.4=hb1b8bf9_0
  - icu=58.2=he6710b0_3
  - idna=2.9=py_1
  - intel-openmp=2020.1=217
  - jasper=1.900.1=hd497a04_4
  - jinja2=2.11.2=py_0
  - joblib=0.15.1=py_0
  - jpeg=9c=h14c3975_1001
  - keras-applications=1.0.8=py_0
  - keras-preprocessing=1.1.0=py_1
  - kiwisolver=1.2.0=py37hfd86e86_0
  - krb5=1.17.1=h173b8e3_0
  - lame=3.100=h7b6447c_0
  - ld_impl_linux-64=2.33.1=h53a641e_7
  - libblas=3.8.0=15_mkl
  - libcblas=3.8.0=15_mkl
  - libcurl=7.69.1=h20c2e04_0
  - libedit=3.1.20181209=hc058e9b_0
  - libffi=3.3=he6710b0_1
  - libgcc-ng=9.1.0=hdf63c60_0
  - libgfortran-ng=7.3.0=hdf63c60_0
  - libiconv=1.15=h63c8f33_5
  - liblapack=3.8.0=15_mkl
  - liblapacke=3.8.0=15_mkl
  - libnetcdf=4.7.3=hb80b6cc_0
  - libpng=1.6.37=hbc83047_0
  - libprotobuf=3.11.4=hd408876_0
  - libssh2=1.9.0=h1ba5d50_1
  - libstdcxx-ng=9.1.0=hdf63c60_0
  - libtiff=4.1.0=h2733197_0
  - libuuid=2.32.1=h14c3975_1000
  - libwebp=1.0.1=h8e7db2f_0
  - libxcb=1.13=h1bed415_1
  - libxml2=2.9.9=hea5a465_1
  - markdown=3.1.1=py37_0
  - markupsafe=1.1.1=py37h7b6447c_0
  - matplotlib=3.1.3=py37_0
  - matplotlib-base=3.1.3=py37hef1b27d_0
  - meshio=4.0.13=py_0
  - mkl=2020.1=217
  - mkl-service=2.3.0=py37he904b0f_0
  - mkl_fft=1.0.15=py37ha843d7b_0
  - mkl_random=1.1.1=py37h0573a6f_0
  - mpld3=0.3=py37_0
  - ncurses=6.2=he6710b0_1
  - netcdf4=1.5.3=py37hbf33ddf_0
  - nettle=3.4.1=hbb512f6_0
  - numpy=1.18.1=py37h4f9e942_0
  - numpy-base=1.18.1=py37hde5b4d6_1
  - oauthlib=3.1.0=py_0
  - olefile=0.46=py37_0
  - opencv=4.1.0=py37h5517eff_4
  - openh264=1.8.0=hd408876_0
  - openssl=1.1.1g=h7b6447c_0
  - opt_einsum=3.1.0=py_0
  - pandas=1.0.3=py37h0573a6f_0
  - patsy=0.5.1=py37_0
  - pcre=8.43=he6710b0_0
  - pillow=7.1.2=py37hb39fc2d_0
  - pip=20.0.2=py37_3
  - pixman=0.38.0=h7b6447c_0
  - plotly=4.6.0=py_0
  - plotly-orca=1.3.1=1
  - promise=2.2.1=py37_0
  - protobuf=3.11.4=py37he6710b0_0
  - psutil=5.7.0=py37h7b6447c_0
  - pyasn1=0.4.8=py_0
  - pyasn1-modules=0.2.7=py_0
  - pycparser=2.20=py_0
  - pyjwt=1.7.1=py37_0
  - pyopenssl=19.1.0=py37_0
  - pyparsing=2.4.7=py_0
  - pyqt=5.9.2=py37h05f1152_2
  - pysocks=1.7.1=py37_0
  - python=3.7.7=hcff3b4d_5
  - python-dateutil=2.8.1=py_0
  - pytz=2020.1=py_0
  - qt=5.9.7=h5867ecd_1
  - readline=8.0=h7b6447c_0
  - requests=2.23.0=py37_0
  - requests-oauthlib=1.3.0=py_0
  - retrying=1.3.3=py37_2
  - rsa=4.0=py_0
  - scikit-learn=0.22.1=py37hd81dba3_0
  - scipy=1.4.1=py37h0b6359f_0
  - seaborn=0.10.1=py_0
  - setuptools=46.4.0=py37_0
  - sip=4.19.8=py37hf484d3e_0
  - six=1.14.0=py37_0
  - sqlite=3.31.1=h62c20be_1
  - statsmodels=0.11.1=py37h7b6447c_0
  - tensorboard=2.2.1=pyh532a8cf_0
  - tensorboard-plugin-wit=1.6.0=py_0
  - tensorflow=2.1.0=gpu_py37h7a4bb67_0
  - tensorflow-base=2.1.0=gpu_py37h6c5654b_0
  - tensorflow-datasets=1.2.0=py37_0
  - tensorflow-estimator=2.1.0=pyhd54b08b_0
  - tensorflow-gpu=2.1.0=h0d30ee6_0
  - tensorflow-metadata=0.14.0=pyhe6710b0_1
  - tensorflow-probability=0.8.0=py_0
  - termcolor=1.1.0=py37_1
  - tk=8.6.8=hbc83047_0
  - tornado=6.0.4=py37h7b6447c_1
  - tqdm=4.46.0=py_0
  - urllib3=1.25.8=py37_0
  - werkzeug=1.0.1=py_0
  - wheel=0.34.2=py37_0
  - wrapt=1.12.1=py37h7b6447c_1
  - x264=1!152.20180806=h7b6447c_0
  - xlrd=1.2.0=py37_0
  - xorg-kbproto=1.0.7=h14c3975_1002
  - xorg-libice=1.0.10=h516909a_0
  - xorg-libsm=1.2.3=h84519dc_1000
  - xorg-libx11=1.6.9=h516909a_0
  - xorg-libxext=1.3.4=h516909a_0
  - xorg-libxrender=0.9.10=h516909a_1002
  - xorg-renderproto=0.11.1=h14c3975_1002
  - xorg-xextproto=7.3.0=h14c3975_1002
  - xorg-xproto=7.0.31=h14c3975_1007
  - xz=5.2.5=h7b6447c_0
  - zlib=1.2.11=h7b6447c_3
  - zstd=1.3.7=h0b5b093_0
  - pip:
    - cloudpickle==1.4.1
    - gast==0.3.3
    - importlib-metadata==1.6.0
    - zipp==3.1.0
