# Supplementary material
Source: ML conference proceedings conference paper supplement (https://proceedings.neurips.cc/paper_files/paper/2020/hash/aab085461de182608ee9f607f3f7d18f-Abstract.html)
Supplement: Supplementary file 16 [file aab085461de182608ee9f607f3f7d18f-Supplemental.zip › supplemental/evidential_regression/figs/depth/calib_errors.csv]

	mean	std	sem
	Calibration Error	Calibration Error	Calibration Error
Dropout	0.10992175326050135	0.003696079255772239	0.002133932353266294
Ensemble	0.04597668953252032	0.027488418140740094	0.015870445613153285
Evidential	0.03391436420223577	0.02688109229504285	0.015519805872654165
GroundTruth	0.0
