# Supplementary material
Source: ML conference proceedings conference paper supplement (https://proceedings.neurips.cc/paper_files/paper/2020/hash/aab085461de182608ee9f607f3f7d18f-Abstract.html)
Supplement: Supplementary file 16 [file aab085461de182608ee9f607f3f7d18f-Supplemental.zip › supplemental/evidential_regression/models/depth/bbbp.py]

import tensorflow as tf
import tensorflow_probability as tfp
from tensorflow.keras.layers import Conv2D, MaxPooling2D, \
    UpSampling2D, Cropping2D, concatenate, ZeroPadding2D, SpatialDropout2D

import functools


# class Depth_BBBP(tf.keras.Model):
#
#     def __init__(self, num_class, activation):
#         super(Depth_BBBP, self).__init__()
#
#         Conv2D = functools.partial(tf.keras.layers.Conv2D, activation=activation, padding='same')
#         Conv2D_ = functools.partial(tfp.layers.Convolution2DFlipout, activation=activation, padding='same')
#
#         self.concat_axis = 3
#
#         self.conv1 = Conv2D(32, 3)
#         self.pool1 = Conv2D_(32, 3, strides=2)
#
#         self.conv2 = Conv2D(64, 3)
#         self.pool2 = Conv2D_(64, 3, strides=2)
#
#         self.conv3 = Conv2D(128, 3)
#         self.pool3 = Conv2D_(128, 3, strides=2)
#
#         self.conv4 = Conv2D(256, 3)
#         self.pool4 = Conv2D_(256, 3, strides=2)
#
#         self.conv5 = Conv2D(512, 3)
#         self.conv6 = Conv2D_(512, 3)
#
#
#         self.up7 = UpSampling2D(2)
#         self.conv7 = Conv2D(256, 3)
#         self.conv8 = Conv2D_(256, 3)
#
#         self.up9 = UpSampling2D(2)
#         self.conv9 = Conv2D(128, 3)
#         self.conv10 = Conv2D_(128, 3)
#
#         self.up11 = UpSampling2D(2)
#         self.conv11 = Conv2D(64, 3)
#         self.conv12 = Conv2D_(64, 3)
#
#         self.up13 = UpSampling2D(2)
#         self.conv13 = Conv2D(32, 3)
#         self.conv14 = Conv2D_(32, 3)
#
#         self.conv15 = Conv2D(num_class, 3)
#
#     def call(self, inputs):
#         conv1 = self.conv1(inputs)
#         pool1 = self.pool1(conv1)
#
#         conv2 = self.conv2(pool1)
#         pool2 = self.pool2(conv2)
#
#         conv3 = self.conv3(pool2)
#         pool3 = self.pool3(conv3)
#
#         conv4 = self.conv4(pool3)
#         pool4 = self.pool4(conv4)
#
#         conv5 = self.conv5(pool4)
#         conv6 = self.conv6(conv5)
#
#         up7 = self.up7(conv6)
#         cat7 = concatenate([up7, conv4], axis=self.concat_axis)
#         conv7 = self.conv7(cat7)
#         conv8 = self.conv8(conv7)
#
#         up9 = self.up9(conv8)
#         cat9 = concatenate([up9, conv3], axis=self.concat_axis)
#         conv9 = self.conv9(cat9)
#         conv10 = self.conv10(conv9)
#
#         up11 = self.up11(conv10)
#         cat11 = concatenate([up11, conv2], axis=self.concat_axis)
#         conv11 = self.conv11(cat11)
#         conv12 = self.conv12(conv11)
#
#         up13 = self.up13(conv12)
#         cat13 = concatenate([up13, conv1], axis=self.concat_axis)
#         conv13 = self.conv13(cat13)
#         conv14 = self.conv14(conv13)
#
#         conv15 = self.conv15(conv14)
#
#         return conv15


def create(input_shape, num_class=1, activation=tf.nn.relu):
    opts = locals().copy()

    # model = Depth_BBBP(num_class, activation)
    # return model, opts

    concat_axis = 3
    inputs = tf.keras.layers.Input(shape=input_shape)

    Conv2D_ = functools.partial(tfp.layers.Convolution2DReparameterization, activation=activation, padding='same')

    conv1 = Conv2D_(32, (3, 3))(inputs)
    conv1 = Conv2D_(32, (3, 3))(conv1)
    pool1 = MaxPooling2D(pool_size=(2, 2))(conv1)

    conv2 = Conv2D_(64, (3, 3))(pool1)
    conv2 = Conv2D_(64, (3, 3))(conv2)
    pool2 = MaxPooling2D(pool_size=(2, 2))(conv2)

    conv3 = Conv2D_(128, (3, 3))(pool2)
    conv3 = Conv2D_(128, (3, 3))(conv3)
    pool3 = MaxPooling2D(pool_size=(2, 2))(conv3)

    conv4 = Conv2D_(256, (3, 3))(pool3)
    conv4 = Conv2D_(256, (3, 3))(conv4)
    pool4 = MaxPooling2D(pool_size=(2, 2))(conv4)

    conv5 = Conv2D_(512, (3, 3))(pool4)
    conv5 = Conv2D_(512, (3, 3))(conv5)

    up_conv5 = UpSampling2D(size=(2, 2))(conv5)
    ch, cw = get_crop_shape(conv4, up_conv5)
    crop_conv4 = Cropping2D(cropping=(ch,cw))(conv4)
    up6 = concatenate([up_conv5, crop_conv4], axis=concat_axis)
    conv6 = Conv2D_(256, (3, 3))(up6)
    conv6 = Conv2D_(256, (3, 3))(conv6)

    up_conv6 = UpSampling2D(size=(2, 2))(conv6)
    ch, cw = get_crop_shape(conv3, up_conv6)
    crop_conv3 = Cropping2D(cropping=(ch,cw))(conv3)
    up7 = concatenate([up_conv6, crop_conv3], axis=concat_axis)
    conv7 = Conv2D_(128, (3, 3))(up7)
    conv7 = Conv2D_(128, (3, 3))(conv7)

    up_conv7 = UpSampling2D(size=(2, 2))(conv7)
    ch, cw = get_crop_shape(conv2, up_conv7)
    crop_conv2 = Cropping2D(cropping=(ch,cw))(conv2)
    up8 = concatenate([up_conv7, crop_conv2], axis=concat_axis)
    conv8 = Conv2D_(64, (3, 3))(up8)
    conv8 = Conv2D_(64, (3, 3))(conv8)

    up_conv8 = UpSampling2D(size=(2, 2))(conv8)
    ch, cw = get_crop_shape(conv1, up_conv8)
    crop_conv1 = Cropping2D(cropping=(ch,cw))(conv1)
    up9 = concatenate([up_conv8, crop_conv1], axis=concat_axis)
    conv9 = Conv2D_(32, (3, 3))(up9)
    conv9 = Conv2D_(32, (3, 3))(conv9)

    ch, cw = get_crop_shape(inputs, conv9)
    conv9 = ZeroPadding2D(padding=((ch[0], ch[1]), (cw[0], cw[1])))(conv9)
    conv10 = Conv2D(num_class, (1, 1))(conv9)
    conv10 = 1e-6 * conv10

    model = tf.keras.models.Model(inputs=inputs, outputs=conv10)
    return model, opts

def get_crop_shape(target, refer):
    # width, the 3rd dimension
    cw = (target.get_shape()[2] - refer.get_shape()[2])
    assert (cw >= 0)
    if cw % 2 != 0:
        cw1, cw2 = int(cw/2), int(cw/2) + 1
    else:
        cw1, cw2 = int(cw/2), int(cw/2)
    # height, the 2nd dimension
    ch = (target.get_shape()[1] - refer.get_shape()[1])
    assert (ch >= 0)
    if ch % 2 != 0:
        ch1, ch2 = int(ch/2), int(ch/2) + 1
    else:
        ch1, ch2 = int(ch/2), int(ch/2)

    return (ch1, ch2), (cw1, cw2)
#
# # import numpy as np
# # model = create((64,64,3), 2)
# # x = np.ones((1,64,64,3), dtype=np.float32)
# # output = model(x)
# # import pdb; pdb.set_trace()
