# Supplementary material
Source: ML conference proceedings conference paper supplement (https://proceedings.neurips.cc/paper_files/paper/2020/hash/aab085461de182608ee9f607f3f7d18f-Abstract.html)
Supplement: Supplementary file 16 [file aab085461de182608ee9f607f3f7d18f-Supplemental.zip › supplemental/evidential_regression/models/depth/ensemble.py]

import tensorflow as tf
from . import dropout

def create(input_shape, num_ensembles=5, sigma=True, activation=tf.nn.relu, num_class=1):
    opts = locals().copy()

    def create_single_model():
        model, dropout_options = dropout.create(input_shape, drop_prob=0.0, sigma=sigma, activation=activation, num_class=num_class)
        return model

    models = [create_single_model() for _ in range(num_ensembles)]
    return models, opts
