# Supplementary material
Source: ML conference proceedings conference paper supplement (https://proceedings.neurips.cc/paper_files/paper/2020/hash/aab085461de182608ee9f607f3f7d18f-Abstract.html)
Supplement: Supplementary file 16 [file aab085461de182608ee9f607f3f7d18f-Supplemental.zip › supplemental/evidential_regression/models/toy/ensemble.py]

import tensorflow as tf
import functools
import edl

def create(
    input_shape,
    num_neurons=50,
    num_layers=1,
    activation=tf.nn.relu,
    num_ensembles=5,
    sigma=True
    ):

    options = locals().copy()

    def create_model():
        inputs = tf.keras.Input(input_shape)
        x = inputs
        for _ in range(num_layers):
            x = tf.keras.layers.Dense(num_neurons, activation=activation)(x)
        output = edl.layers.DenseNormal(1)(x)
        model = tf.keras.Model(inputs=inputs, outputs=output)
        return model

    models = [create_model() for _ in range(num_ensembles)]

    return models, options
