# Supplementary material
Source: ML conference proceedings conference paper supplement (https://proceedings.neurips.cc/paper_files/paper/2020/hash/aab085461de182608ee9f607f3f7d18f-Abstract.html)
Supplement: Supplementary file 16 [file aab085461de182608ee9f607f3f7d18f-Supplemental.zip › supplemental/evidential_regression/trainers/__init__.py]

from .bbbp import BBBP
from .dropout import Dropout
from .ensemble import Ensemble
from .evidential import Evidential
from .gaussian import Gaussian
from .deterministic import Deterministic
