# Supplementary material
Source: ML conference proceedings conference paper supplement (https://proceedings.neurips.cc/paper_files/paper/2020/hash/aab085461de182608ee9f607f3f7d18f-Abstract.html)
Supplement: Supplementary file 16 [file aab085461de182608ee9f607f3f7d18f-Supplemental.zip › supplemental/evidential_regression/trainers/bbbp.py]

import numpy as np
import tensorflow as tf
import tensorflow_probability as tfp
import time
import datetime
import os
import sys
import h5py
from pathlib import Path

import edl
from .util import normalize, gallery

class BBBP:
    def __init__(self, model, opts, dataset="", learning_rate=1e-3, tag=""):
        self.loss_function = edl.losses.MSE

        self.model = model

        self.optimizer = tf.optimizers.Adam(learning_rate)

        self.min_rmse = float('inf')
        self.min_nll = float('inf')
        self.min_vloss = float('inf')

        trainer = self.__class__.__name__
        current_time = datetime.datetime.now().strftime("%Y%m%d-%H%M%S")
        self.save_dir = os.path.join('save','{}_{}_{}_{}'.format(current_time, dataset, trainer, tag))
        Path(self.save_dir).mkdir(parents=True, exist_ok=True)


        train_log_dir = os.path.join('logs', '{}_{}_{}_{}_train'.format(current_time, dataset, trainer, tag))
        self.train_summary_writer = tf.summary.create_file_writer(train_log_dir)
        val_log_dir = os.path.join('logs', '{}_{}_{}_{}_val'.format(current_time, dataset, trainer, tag))
        self.val_summary_writer = tf.summary.create_file_writer(val_log_dir)

    @tf.function
    def run_train_step(self, x, y):
        with tf.GradientTape() as tape:
            y_hat = self.model(x, training=True) #forward pass
            loss = self.loss_function(y, y_hat)
            loss += tf.reduce_mean(self.model.losses)

        grads = tape.gradient(loss, self.model.variables) #compute gradient
        self.optimizer.apply_gradients(zip(grads, self.model.variables))
        return loss, y_hat

    @tf.function
    def evaluate(self, x, y):
        preds = tf.stack([self.model(x, training=True) for _ in range(5)], axis=0) #forward pass
        mu, var = tf.nn.moments(preds, axes=0)
        rmse = edl.losses.RMSE(y, mu)
        nll = edl.losses.Gaussian_NLL(y, mu, tf.sqrt(var))
        loss = self.loss_function(y, mu)

        return mu, var, loss, rmse, nll

    def save_train_summary(self, loss, x, y, y_hat):
        with self.train_summary_writer.as_default():
            # tf.summary.scalar('loss', tf.reduce_mean(loss), step=self.iter)
            tf.summary.scalar('mse', tf.reduce_mean(edl.losses.MSE(y, y_hat)), step=self.iter)
            idx = np.random.choice(int(tf.shape(x)[0]), 9)
            if tf.shape(x).shape==4:
                tf.summary.image("x", [gallery(tf.gather(x,idx).numpy())], max_outputs=1, step=self.iter)

            if tf.shape(y).shape==4:
                tf.summary.image("y", [gallery(tf.gather(y,idx).numpy())], max_outputs=1, step=self.iter)
                tf.summary.image("y_hat", [gallery(tf.gather(y_hat,idx).numpy())], max_outputs=1, step=self.iter)

    def save_val_summary(self, loss, x, y, mu, var):
        with self.val_summary_writer.as_default():
            tf.summary.scalar('loss', tf.reduce_mean(self.loss_function(y, mu)), step=self.iter)
            tf.summary.scalar('mse', tf.reduce_mean(edl.losses.MSE(y, mu)), step=self.iter)
            idx = np.random.choice(int(tf.shape(x)[0]), 9)
            if tf.shape(x).shape==4:
                tf.summary.image("x", [gallery(tf.gather(x,idx).numpy())], max_outputs=1, step=self.iter)

            if tf.shape(y).shape==4:
                tf.summary.image("y", [gallery(tf.gather(y,idx).numpy())], max_outputs=1, step=self.iter)
                tf.summary.image("y_hat", [gallery(tf.gather(mu,idx).numpy())], max_outputs=1, step=self.iter)
                tf.summary.image("y_var", [gallery(normalize(tf.gather(var,idx)).numpy())], max_outputs=1, step=self.iter)

    def get_batch(self, x, y, batch_size):
        idx = np.random.choice(x.shape[0], batch_size, replace=False)
        if isinstance(x, tf.Tensor):
            x_ = x[idx,...]
            y_ = y[idx,...]
        elif isinstance(x, np.ndarray) or isinstance(x, h5py.Dataset):
            idx = np.sort(idx)
            x_ = x[idx,...]
            y_ = y[idx,...]

            x_divisor = 255. if x_.dtype == np.uint8 else 1.0
            y_divisor = 255. if y_.dtype == np.uint8 else 1.0

            x_ = tf.convert_to_tensor(x_/x_divisor, tf.float32)
            y_ = tf.convert_to_tensor(y_/y_divisor, tf.float32)
        else:
            print("unknown dataset type {} {}".format(type(x), type(y)))
        return x_, y_

    def save(self, name):
        self.model.save(os.path.join(self.save_dir, "{}.h5".format(name)))
        # pass

    def train(self, x_train, y_train, x_test, y_test, y_scale, batch_size=128, iters=10000, verbose=True):
        tic = time.time()
        for self.iter in range(iters):
            x_input_batch, y_input_batch = self.get_batch(x_train, y_train, batch_size)
            loss, y_hat = self.run_train_step(x_input_batch, y_input_batch)

            if self.iter % 10 == 0:
                self.save_train_summary(loss, x_input_batch, y_input_batch, y_hat)

            if self.iter % 100 == 0:
                x_test_batch, y_test_batch = self.get_batch(x_test, y_test, min(100, x_test.shape[0]))
                mu, var, vloss, rmse, nll = self.evaluate(x_test_batch, y_test_batch)
                nll += np.log(y_scale[0,0])
                rmse *= y_scale[0,0]

                self.save_val_summary(vloss, x_test_batch, y_test_batch, mu, var)

                if rmse.numpy() < self.min_rmse:
                    self.min_rmse = rmse.numpy()
                    print("SAVING")
                    self.save("model_rmse")

                if nll.numpy() < self.min_nll:
                    self.min_nll = nll.numpy()
                    self.save("model_nll")

                if vloss.numpy() < self.min_vloss:
                    self.min_vloss = vloss.numpy()
                    self.save("model_vloss")

                if verbose: print("[{}] \t RMSE: {:.4f} \t NLL: {:.4f} \t train_loss: {:.4f} \t t: {:.2f} sec".format(self.iter, self.min_rmse, self.min_nll, vloss, time.time()-tic))
                tic = time.time()

        return self.model, self.min_rmse, self.min_nll
