# Supplementary material
Source: ML conference proceedings conference paper supplement (https://proceedings.neurips.cc/paper_files/paper/2020/hash/aab085461de182608ee9f607f3f7d18f-Abstract.html)
Supplement: Supplementary file 16 [file aab085461de182608ee9f607f3f7d18f-Supplemental.zip › supplemental/evidential_regression/trainers/ensemble.py]

import numpy as np
import tensorflow as tf
import time
import datetime
import os
import sys
import h5py
from pathlib import Path

import edl
from .util import normalize, gallery

class Ensemble:
    def __init__(self, models, opts, dataset="", learning_rate=1e-3, tag=""):
        self.mse = not opts['sigma']
        self.loss_function = edl.losses.MSE if self.mse else edl.losses.Gaussian_NLL

        self.models = models

        self.num_ensembles = opts['num_ensembles']

        self.optimizers = [tf.optimizers.Adam(learning_rate) for _ in range(self.num_ensembles)]

        self.min_rmse = float('inf')
        self.min_nll = float('inf')
        self.min_vloss = float('inf')

        trainer = self.__class__.__name__
        current_time = datetime.datetime.now().strftime("%Y%m%d-%H%M%S")
        self.save_dir = os.path.join('save','{}_{}_{}_{}'.format(current_time, dataset, trainer, tag))
        Path(self.save_dir).mkdir(parents=True, exist_ok=True)

        train_log_dir = os.path.join('logs', '{}_{}_{}_{}_train'.format(current_time, dataset, trainer, tag))
        self.train_summary_writer = tf.summary.create_file_writer(train_log_dir)
        val_log_dir = os.path.join('logs', '{}_{}_{}_{}_val'.format(current_time, dataset, trainer, tag))
        self.val_summary_writer = tf.summary.create_file_writer(val_log_dir)


    @tf.function
    def run_train_step(self, x, y):
        losses = []
        y_hats = []
        for (model, optimizer) in zip(self.models, self.optimizers): #Autograph unrolls this so make sure ensemble size is not too large

            with tf.GradientTape() as tape:
                outputs = model(x, training=True) #forward pass
                if self.mse:
                    mu = outputs
                    loss = self.loss_function(y, mu)
                else:
                    mu, sigma = tf.split(outputs, 2, axis=-1)
                    loss = self.loss_function(y, mu, sigma)
                y_hats.append(mu)
                losses.append(loss)

            grads = tape.gradient(loss, model.variables) #compute gradient
            optimizer.apply_gradients(zip(grads, model.variables))

        return tf.reduce_mean(losses), tf.reduce_mean(y_hats, 0)

    @tf.function
    def evaluate(self, x, y):
        preds = tf.stack([model(x, training=False) for model in self.models], axis=0) #forward pass
        if self.mse:
            mean_mu, var = tf.nn.moments(preds, 0)
            loss = self.loss_function(y, mean_mu)

        else:
            mus, sigmas = tf.split(preds, 2, axis=-1)
            mean_mu = tf.reduce_mean(mus, axis=0)
            mean_sigma = tf.reduce_mean(sigmas, axis=0)
            var = tf.reduce_mean(sigmas**2 + tf.square(mus), axis=0) - tf.square(mean_mu)
            loss = self.loss_function(y, mean_mu, tf.sqrt(var))

        rmse = edl.losses.RMSE(y, mean_mu)
        nll = edl.losses.Gaussian_NLL(y, mean_mu, tf.sqrt(var))

        return mean_mu, var, loss, rmse, nll

    def save_train_summary(self, loss, x, y, y_hat):
        with self.train_summary_writer.as_default():
            tf.summary.scalar('mse', tf.reduce_mean(edl.losses.MSE(y, y_hat)), step=self.iter)
            tf.summary.scalar('loss', tf.reduce_mean(loss), step=self.iter)
            idx = np.random.choice(int(tf.shape(x)[0]), 9)
            if tf.shape(x).shape==4:
                tf.summary.image("x", [gallery(tf.gather(x,idx).numpy())], max_outputs=1, step=self.iter)

            if tf.shape(y).shape==4:
                tf.summary.image("y", [gallery(tf.gather(y,idx).numpy())], max_outputs=1, step=self.iter)
                tf.summary.image("y_hat", [gallery(tf.gather(y_hat,idx).numpy())], max_outputs=1, step=self.iter)

    def save_val_summary(self, loss, x, y, mu, var):
        with self.val_summary_writer.as_default():
            tf.summary.scalar('mse', tf.reduce_mean(edl.losses.MSE(y, mu)), step=self.iter)
            tf.summary.scalar('loss', tf.reduce_mean(loss), step=self.iter)
            idx = np.random.choice(int(tf.shape(x)[0]), 9)
            if tf.shape(x).shape==4:
                tf.summary.image("x", [gallery(tf.gather(x,idx).numpy())], max_outputs=1, step=self.iter)

            if tf.shape(y).shape==4:
                tf.summary.image("y", [gallery(tf.gather(y,idx).numpy())], max_outputs=1, step=self.iter)
                tf.summary.image("y_hat", [gallery(tf.gather(mu,idx).numpy())], max_outputs=1, step=self.iter)
                tf.summary.image("y_var", [gallery(normalize(tf.gather(var,idx)).numpy())], max_outputs=1, step=self.iter)

    def get_batch(self, x, y, batch_size):
        idx = np.random.choice(x.shape[0], batch_size, replace=False)
        if isinstance(x, tf.Tensor):
            x_ = x[idx,...]
            y_ = y[idx,...]
        elif isinstance(x, np.ndarray) or isinstance(x, h5py.Dataset):
            idx = np.sort(idx)
            x_ = x[idx,...]
            y_ = y[idx,...]

            x_divisor = 255. if x_.dtype == np.uint8 else 1.0
            y_divisor = 255. if y_.dtype == np.uint8 else 1.0

            x_ = tf.convert_to_tensor(x_/x_divisor, tf.float32)
            y_ = tf.convert_to_tensor(y_/y_divisor, tf.float32)
        else:
            print("unknown dataset type {} {}".format(type(x), type(y)))
        return x_, y_

    def save(self, name):
        for i, model in enumerate(self.models):
            model.save(os.path.join(self.save_dir, "{}_{}.h5".format(name, i)))

    def train(self, x_train, y_train, x_test, y_test, y_scale, batch_size=128, iters=10000, verbose=True):
        tic = time.time()
        for self.iter in range(iters):
            x_input_batch, y_input_batch = self.get_batch(x_train, y_train, batch_size)
            loss, y_hat = self.run_train_step(x_input_batch, y_input_batch)

            if self.iter % 10 == 0:
                self.save_train_summary(loss, x_input_batch, y_input_batch, y_hat)

            if self.iter % 100 == 0:
                x_test_batch, y_test_batch = self.get_batch(x_test, y_test, min(100, x_test.shape[0]))
                mu, var, vloss, rmse, nll = self.evaluate(x_test_batch, y_test_batch)
                nll += np.log(y_scale[0,0])
                rmse *= y_scale[0,0]

                self.save_val_summary(vloss, x_test_batch, y_test_batch, mu, var)

                if rmse.numpy() < self.min_rmse:
                    self.min_rmse = rmse.numpy()
                    self.save(f"model_rmse_{self.iter}")

                if nll.numpy() < self.min_nll:
                    self.min_nll = nll.numpy()
                    self.save(f"model_nll_{self.iter}")

                if vloss.numpy() < self.min_vloss:
                    self.min_vloss = vloss.numpy()
                    self.save(f"model_vloss_{self.iter}")

                if verbose: print("[{}] \t RMSE: {:.4f} \t NLL: {:.4f} \t train_loss: {:.4f} \t t: {:.2f} sec".format(self.iter, self.min_rmse, self.min_nll, loss, time.time()-tic))
                tic = time.time()

        return self.models, self.min_rmse, self.min_nll
