# Supplementary material
Source: ML conference proceedings conference paper supplement (https://proceedings.neurips.cc/paper_files/paper/2020/hash/aab085461de182608ee9f607f3f7d18f-Abstract.html)
Supplement: Supplementary file 16 [file aab085461de182608ee9f607f3f7d18f-Supplemental.zip › supplemental/evidential_regression/trainers/gaussian.py]

import numpy as np
import tensorflow as tf
import time
import datetime
import os
import sys
import h5py
from pathlib import Path

import edl
from .util import normalize, gallery

class Gaussian:
    def __init__(self, model, opts, dataset="", learning_rate=1e-3, tag=""):
        self.loss_function = edl.losses.Gaussian_NLL

        self.model = model

        self.optimizer = tf.optimizers.Adam(learning_rate)

        self.min_rmse = float('inf')
        self.min_nll = float('inf')
        self.min_vloss = float('inf')

        trainer = self.__class__.__name__
        current_time = datetime.datetime.now().strftime("%Y%m%d-%H%M%S")
        self.save_dir = os.path.join('save','{}_{}_{}_{}'.format(current_time, dataset, trainer, tag))
        Path(self.save_dir).mkdir(parents=True, exist_ok=True)

        train_log_dir = os.path.join('logs', '{}_{}_{}_{}_train'.format(current_time, dataset, trainer, tag))
        self.train_summary_writer = tf.summary.create_file_writer(train_log_dir)
        val_log_dir = os.path.join('logs', '{}_{}_{}_{}_val'.format(current_time, dataset, trainer, tag))
        self.val_summary_writer = tf.summary.create_file_writer(val_log_dir)

    @tf.function
    def run_train_step(self, x, y):
        with tf.GradientTape() as tape:
            outputs = self.model(x, training=True) #forward pass
            mu, sigma = tf.split(outputs, 2, axis=-1)
            loss = self.loss_function(y, mu, sigma)
        grads = tape.gradient(loss, self.model.variables) #compute gradient
        self.optimizer.apply_gradients(zip(grads, self.model.variables))

        return loss, mu

    @tf.function
    def evaluate(self, x, y):
        outputs = self.model(x, training=True) #forward pass
        mu, sigma = tf.split(outputs, 2, axis=-1)
        rmse = edl.losses.RMSE(y, mu)
        nll = edl.losses.Gaussian_NLL(y, mu, sigma)
        loss = self.loss_function(y, mu, sigma)

        return mu, sigma, loss, rmse, nll

    def save_train_summary(self, loss, x, y, y_hat):
        with self.train_summary_writer.as_default():
            tf.summary.scalar('mse', tf.reduce_mean(edl.losses.MSE(y, y_hat)), step=self.iter)
            tf.summary.scalar('loss', tf.reduce_mean(loss), step=self.iter)
            idx = np.random.choice(int(tf.shape(x)[0]), 9)
            if tf.shape(x).shape==4:
                tf.summary.image("x", [gallery(tf.gather(x,idx).numpy())], max_outputs=1, step=self.iter)

            if tf.shape(y).shape==4:
                tf.summary.image("y", [gallery(tf.gather(y,idx).numpy())], max_outputs=1, step=self.iter)
                tf.summary.image("y_hat", [gallery(tf.gather(y_hat,idx).numpy())], max_outputs=1, step=self.iter)

    def save_val_summary(self, loss, x, y, mu, var):
        with self.val_summary_writer.as_default():
            tf.summary.scalar('mse', tf.reduce_mean(edl.losses.MSE(y, mu)), step=self.iter)
            tf.summary.scalar('loss', tf.reduce_mean(self.loss_function(y, mu, tf.sqrt(var))), step=self.iter)
            idx = np.random.choice(int(tf.shape(x)[0]), 9)
            if tf.shape(x).shape==4:
                tf.summary.image("x", [gallery(tf.gather(x,idx).numpy())], max_outputs=1, step=self.iter)

            if tf.shape(y).shape==4:
                tf.summary.image("y", [gallery(tf.gather(y,idx).numpy())], max_outputs=1, step=self.iter)
                tf.summary.image("y_hat", [gallery(tf.gather(mu,idx).numpy())], max_outputs=1, step=self.iter)
                tf.summary.image("y_var", [gallery(normalize(tf.gather(var,idx)).numpy())], max_outputs=1, step=self.iter)

    def get_batch(self, x, y, batch_size):
        idx = np.random.choice(x.shape[0], batch_size, replace=False)
        if isinstance(x, tf.Tensor):
            x_ = x[idx,...]
            y_ = y[idx,...]
        elif isinstance(x, np.ndarray) or isinstance(x, h5py.Dataset):
            idx = np.sort(idx)
            x_ = x[idx,...]
            y_ = y[idx,...]

            x_divisor = 255. if x_.dtype == np.uint8 else 1.0
            y_divisor = 255. if y_.dtype == np.uint8 else 1.0

            x_ = tf.convert_to_tensor(x_/x_divisor, tf.float32)
            y_ = tf.convert_to_tensor(y_/y_divisor, tf.float32)
        else:
            print("unknown dataset type {} {}".format(type(x), type(y)))
        return x_, y_

    def save(self, name):
        self.model.save(os.path.join(self.save_dir, "{}.h5".format(name)))

    def train(self, x_train, y_train, x_test, y_test, y_scale, batch_size=128, iters=10000, verbose=True):
        tic = time.time()
        for self.iter in range(iters):
            x_input_batch, y_input_batch = self.get_batch(x_train, y_train, batch_size)
            loss, y_hat = self.run_train_step(x_input_batch, y_input_batch)

            if self.iter % 10 == 0:
                self.save_train_summary(loss, x_input_batch, y_input_batch, y_hat)

            if self.iter % 10 == 0:
                x_test_batch, y_test_batch = self.get_batch(x_test, y_test, min(100, x_test.shape[0]))
                mu, var, vloss, rmse, nll = self.evaluate(x_test_batch, y_test_batch)
                nll += np.log(y_scale[0,0])
                rmse *= y_scale[0,0]

                self.save_val_summary(vloss, x_test_batch, y_test_batch, mu, var)

                if rmse.numpy() < self.min_rmse:
                    self.min_rmse = rmse.numpy()
                    self.save(f"model_rmse_{self.iter}")

                if nll.numpy() < self.min_nll:
                    self.min_nll = nll.numpy()
                    self.save(f"model_nll_{self.iter}")

                if vloss.numpy() < self.min_vloss:
                    self.min_vloss = vloss.numpy()
                    self.save(f"model_vloss_{self.iter}")

                if verbose: print("[{}] \t RMSE: {:.4f} \t NLL: {:.4f} \t train_loss: {:.4f} \t t: {:.2f} sec".format(self.iter, self.min_rmse, self.min_nll, loss, time.time()-tic))
                tic = time.time()


        return self.model, self.min_rmse, self.min_nll
