# Supplementary material
Source: ML conference proceedings conference paper supplement (https://proceedings.neurips.cc/paper_files/paper/2020/hash/aab085461de182608ee9f607f3f7d18f-Abstract.html)

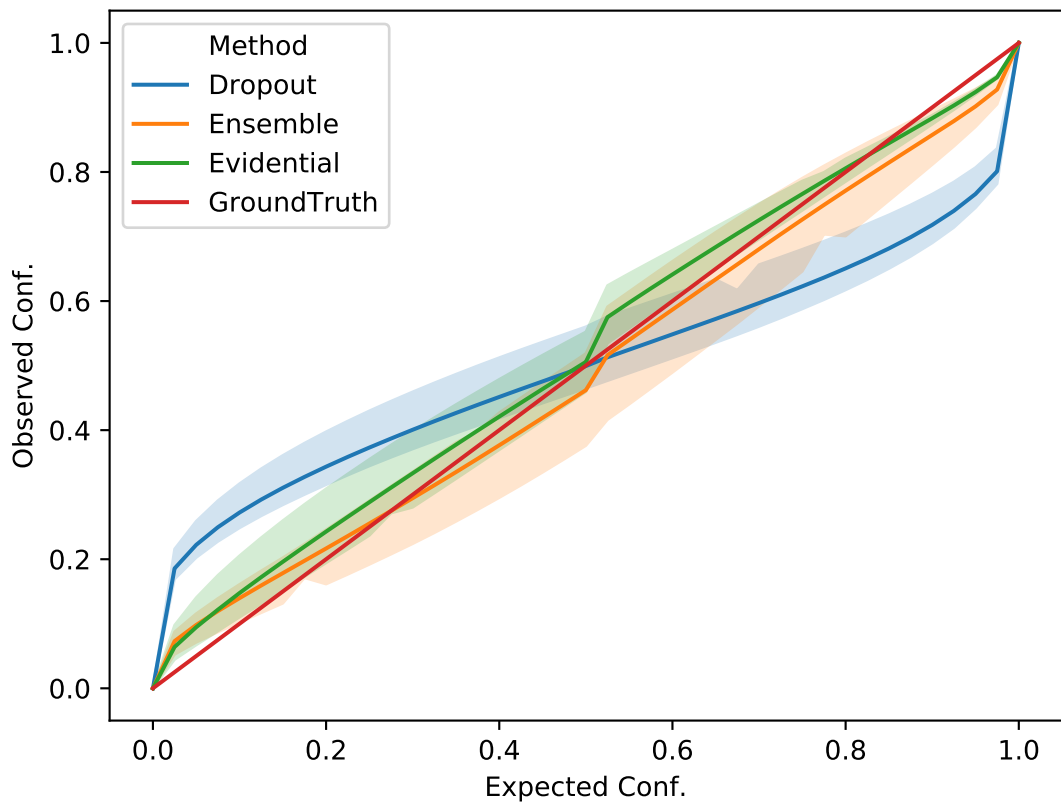

Supplement: Supplementary file 1 [file aab085461de182608ee9f607f3f7d18f-Supplemental.zip]

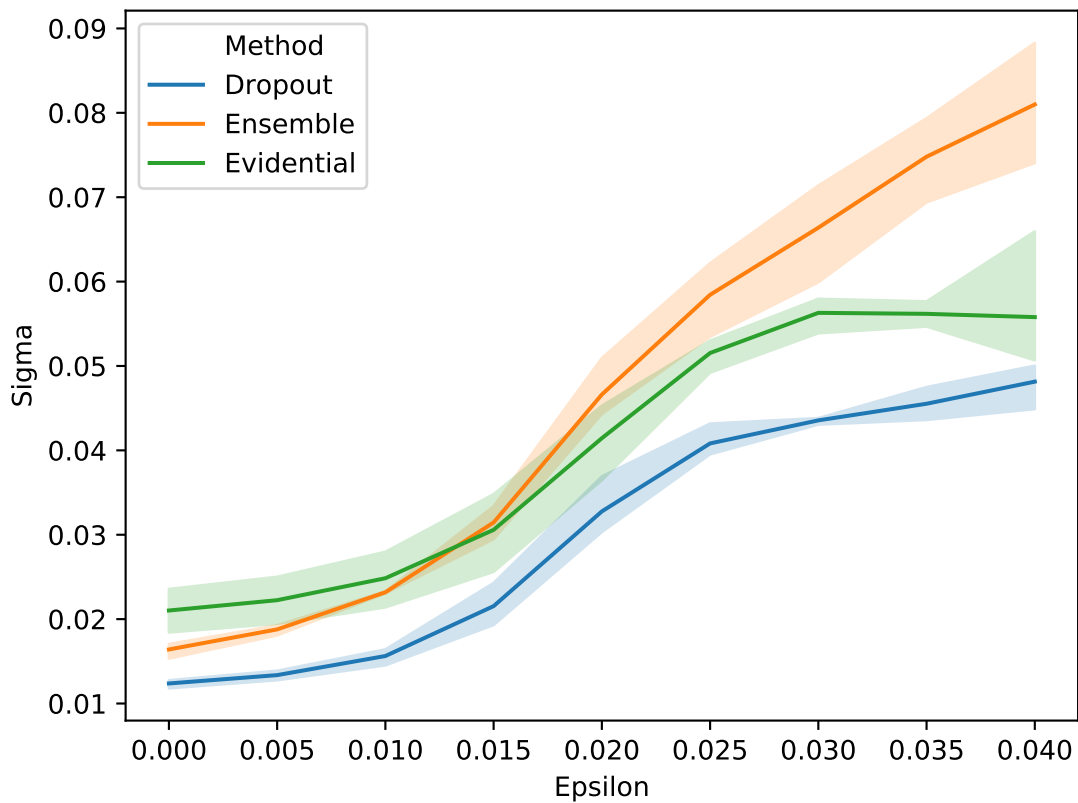

Supplement: Supplementary file 2 [file aab085461de182608ee9f607f3f7d18f-Supplemental.zip]

Method = Dropout

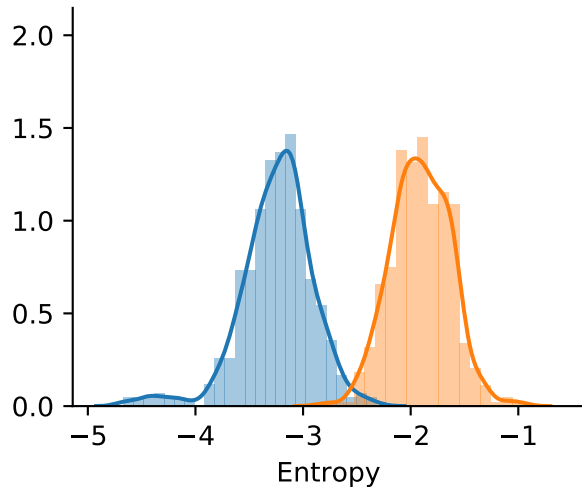

Method = Ensemble

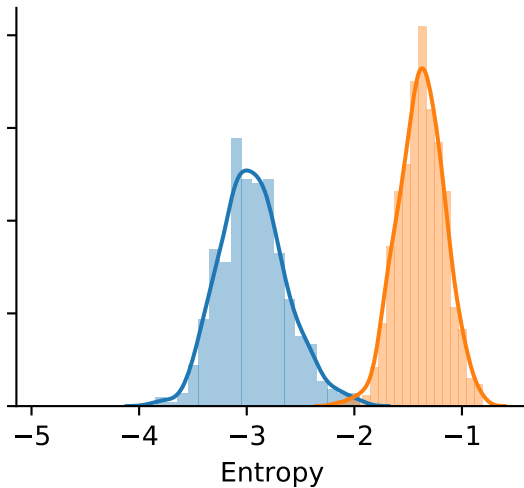

Method = Evidential

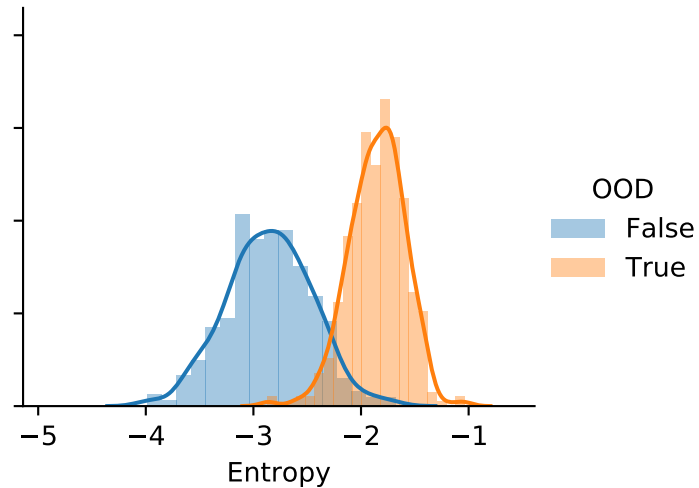

Supplement: Supplementary file 3 [file aab085461de182608ee9f607f3f7d18f-Supplemental.zip]

./figs/toy/gaussian\_4\_layers\_100\_neurons.pdf

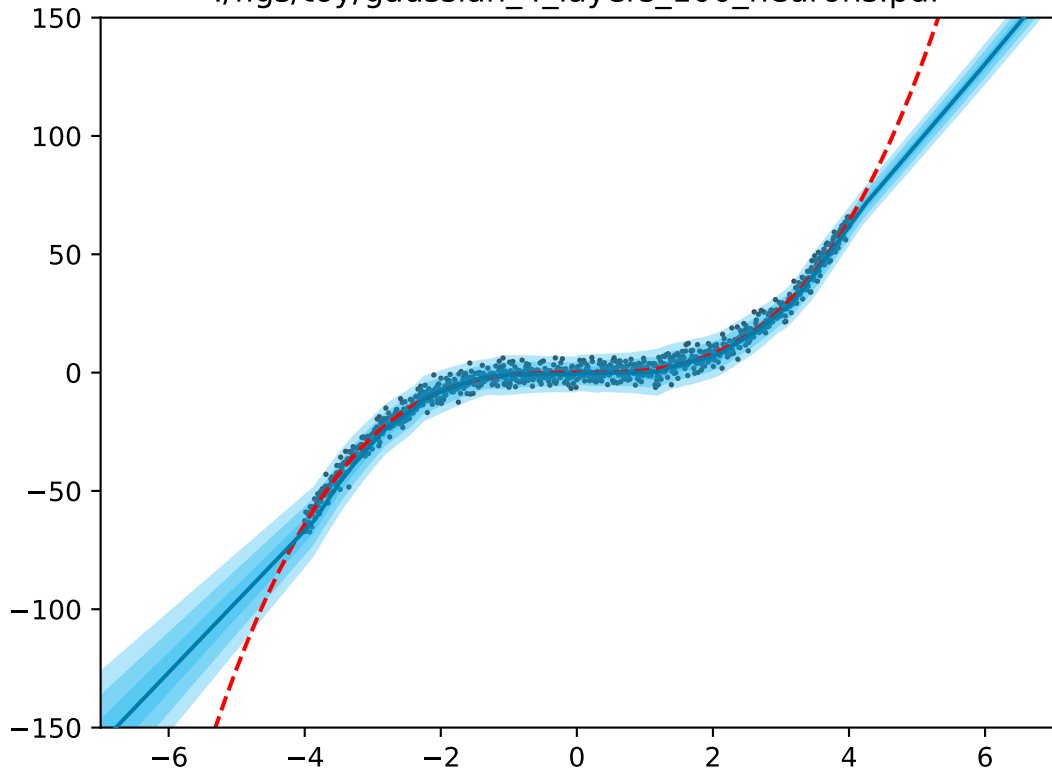

Supplement: Supplementary file 4 [file aab085461de182608ee9f607f3f7d18f-Supplemental.zip]

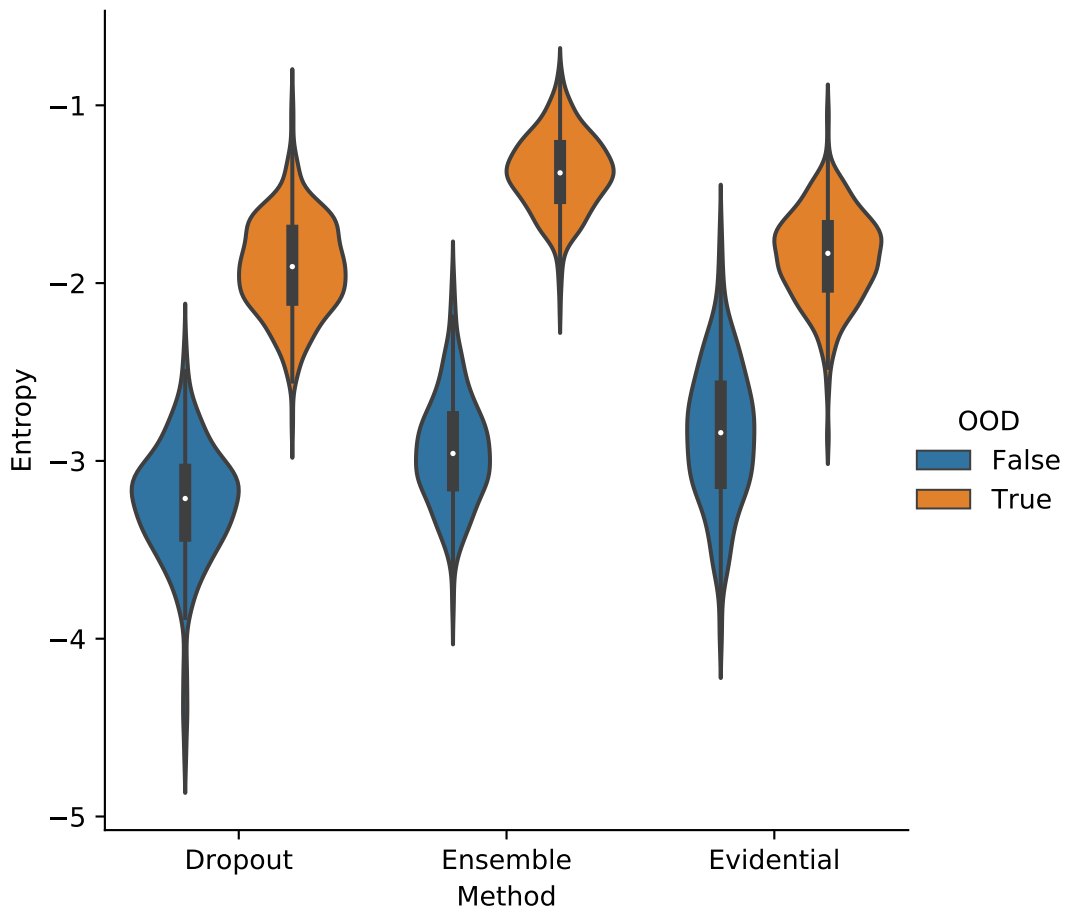

Supplement: Supplementary file 5 [file aab085461de182608ee9f607f3f7d18f-Supplemental.zip]

./figs/toy/ensemble\_4\_layers\_100\_neurons.pdf

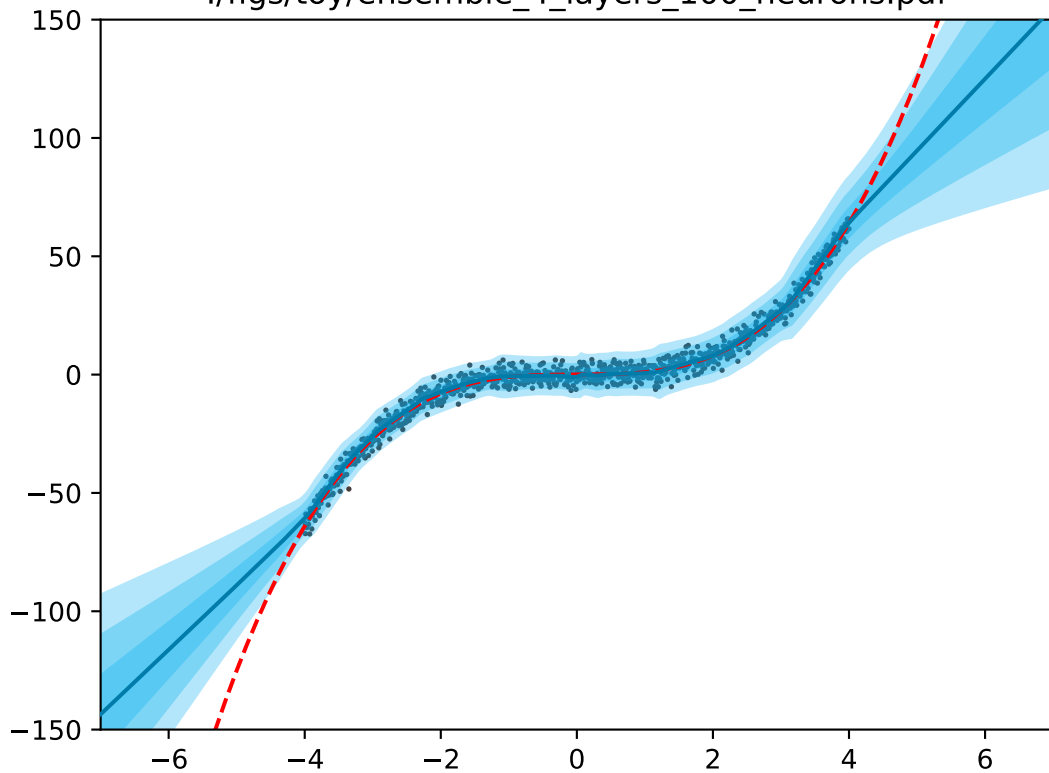

Supplement: Supplementary file 6 [file aab085461de182608ee9f607f3f7d18f-Supplemental.zip]

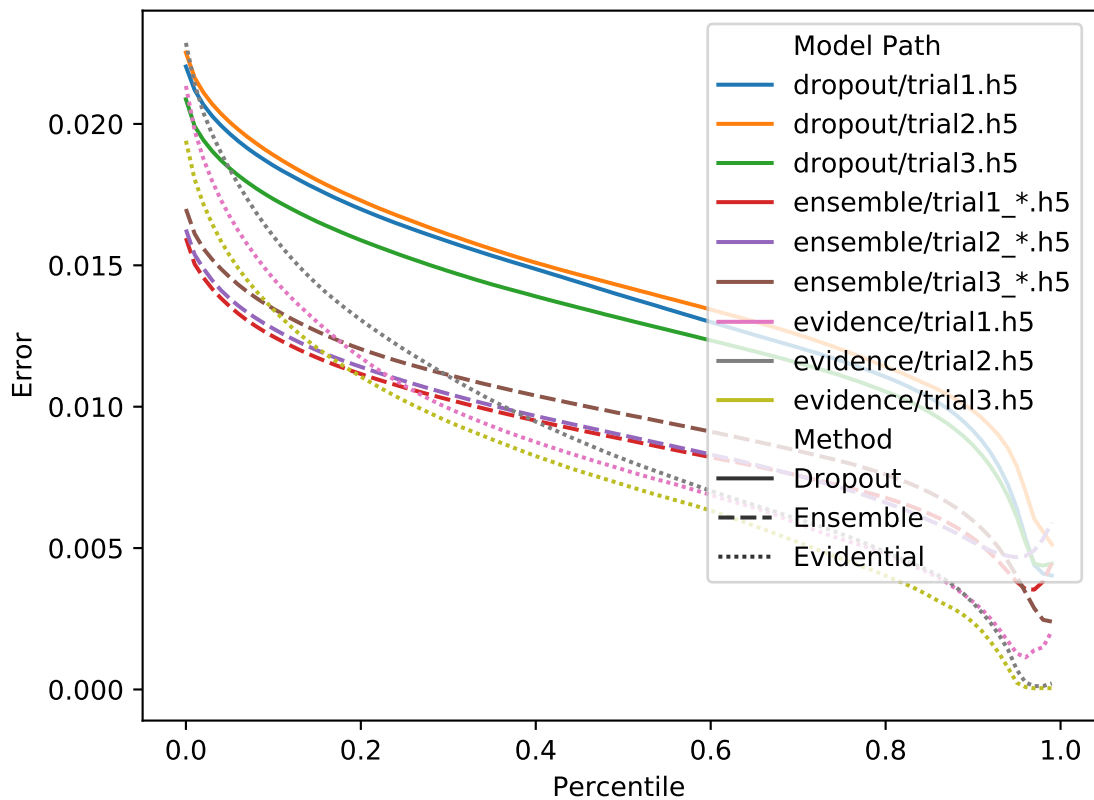

Supplement: Supplementary file 7 [file aab085461de182608ee9f607f3f7d18f-Supplemental.zip]

./figs/toy/bbbp\_4\_layers\_100\_neurons.pdf

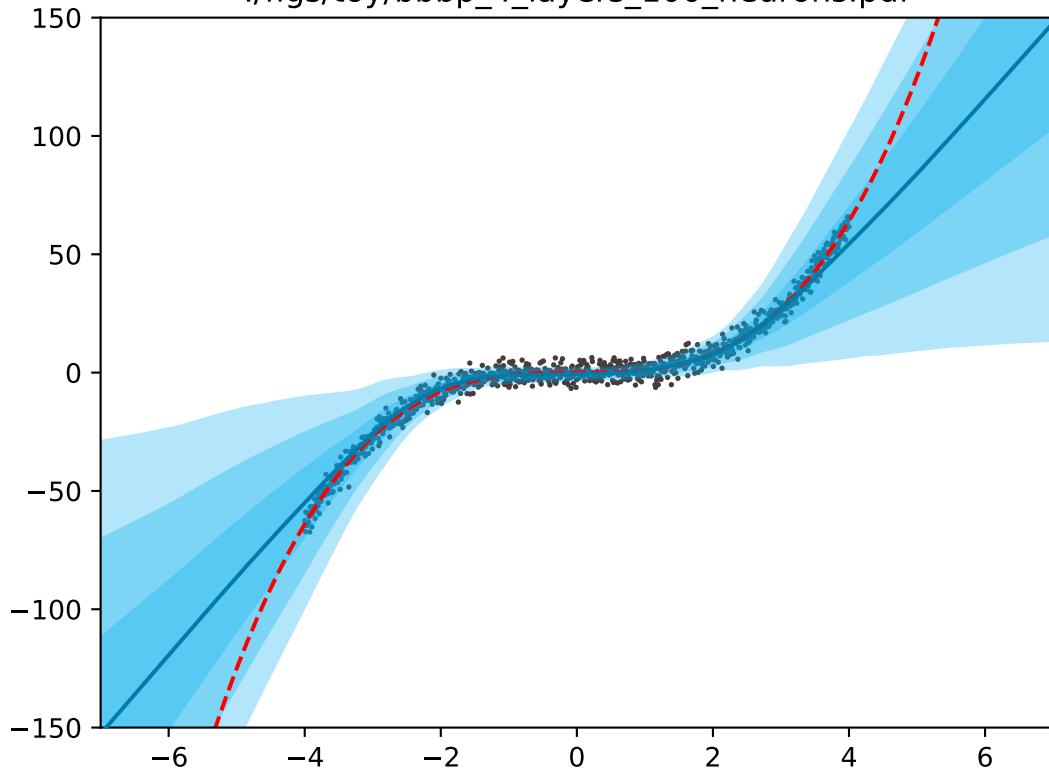

Supplement: Supplementary file 8 [file aab085461de182608ee9f607f3f7d18f-Supplemental.zip]

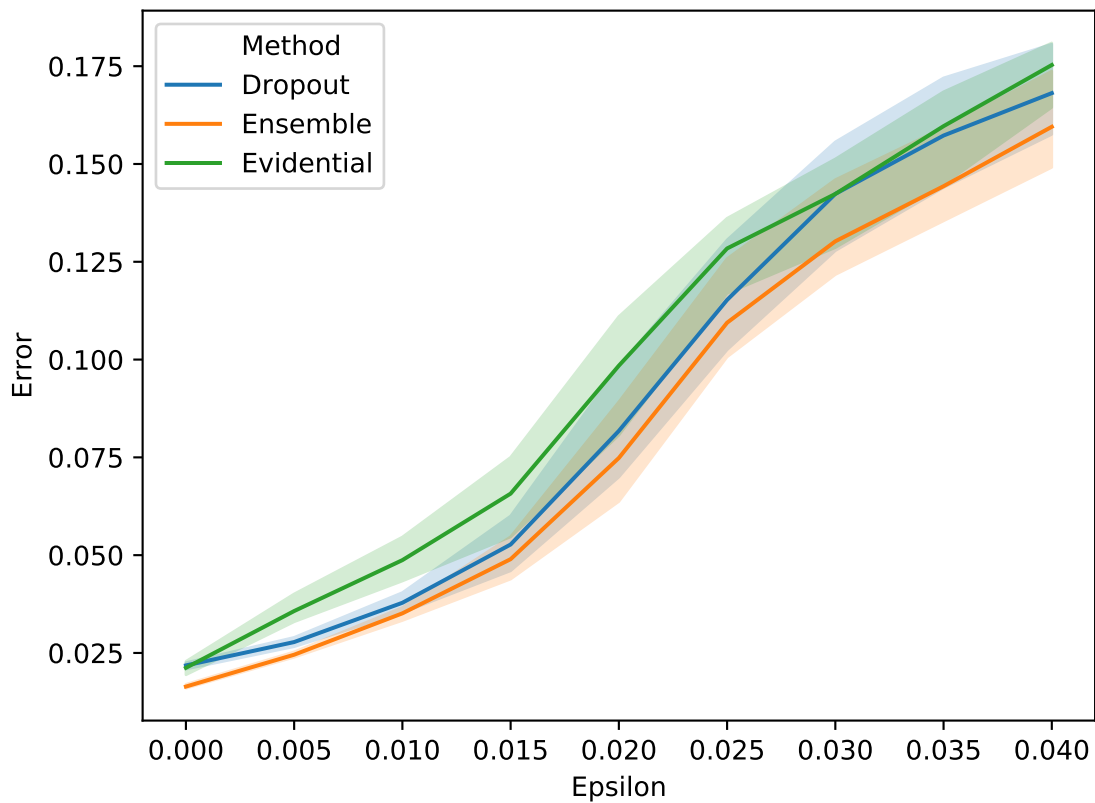

Supplement: Supplementary file 9 [file aab085461de182608ee9f607f3f7d18f-Supplemental.zip]

./figs/toy/evidence\_reg\_4\_layers\_100\_neurons.pdf

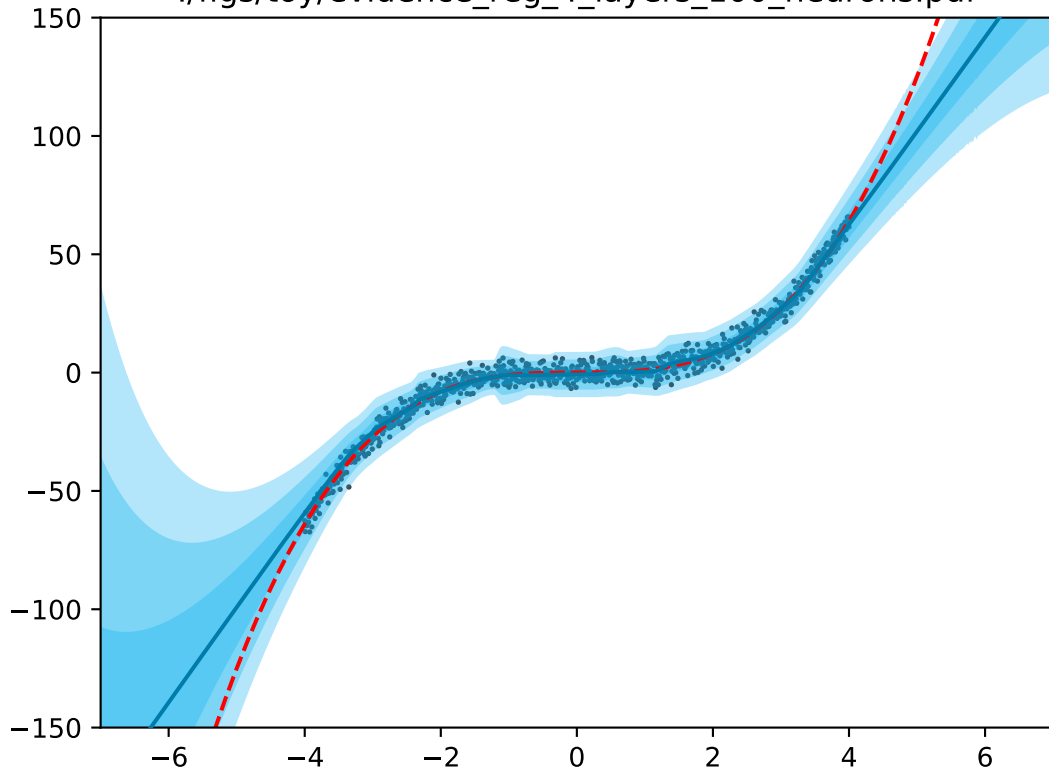

Supplement: Supplementary file 11 [file aab085461de182608ee9f607f3f7d18f-Supplemental.zip]

Method = Dropout

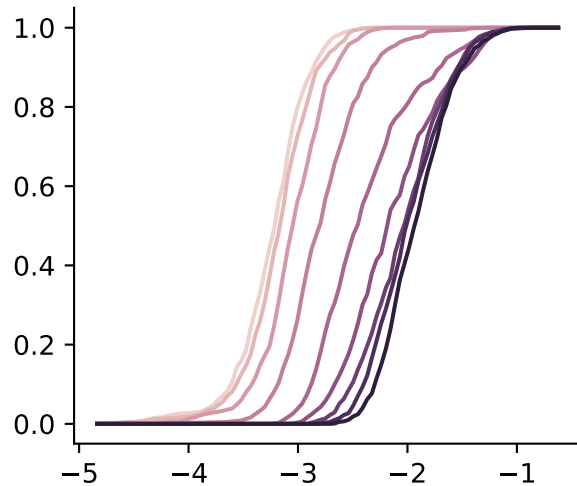

Method = Ensemble

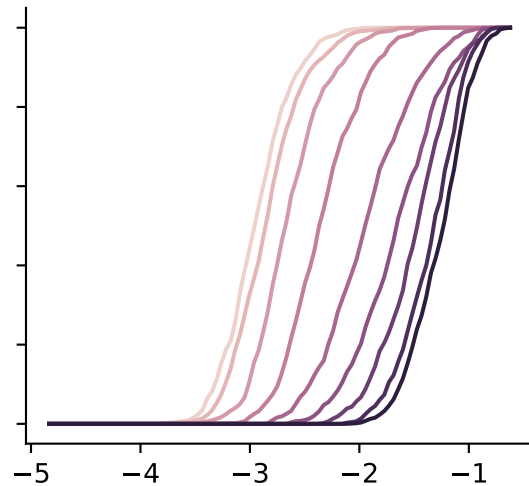

Method = Evidential

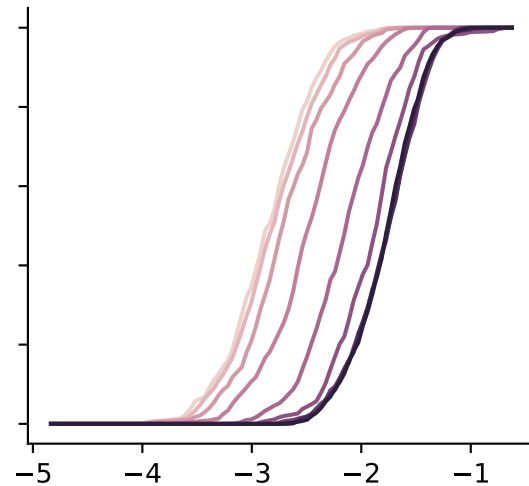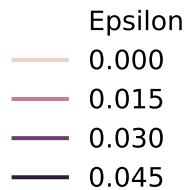

Supplement: Supplementary file 12 [file aab085461de182608ee9f607f3f7d18f-Supplemental.zip]

Method = Dropout

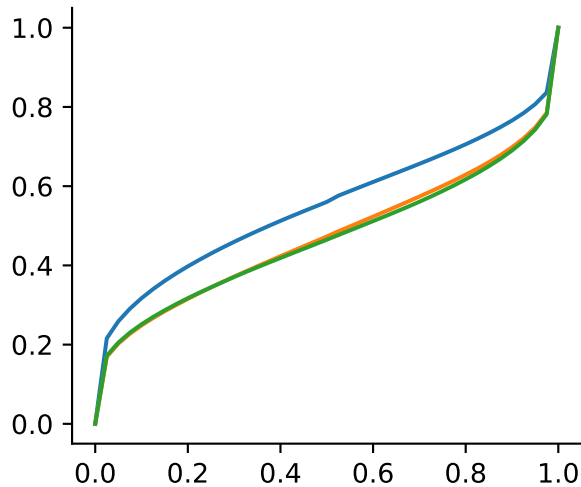

Method = Ensemble

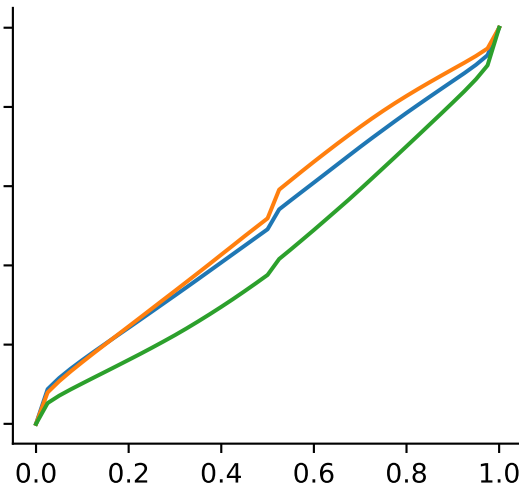

Method = Evidential

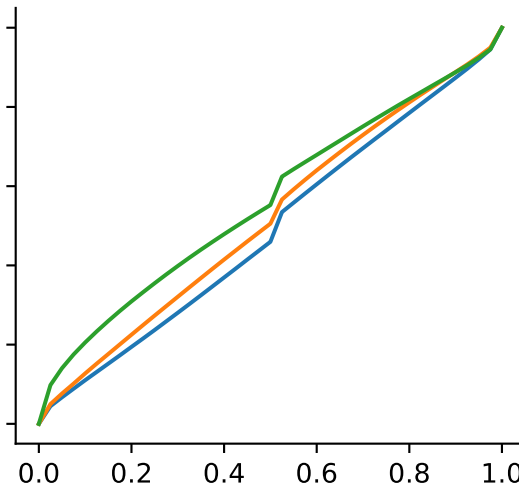

Method = GroundTruth

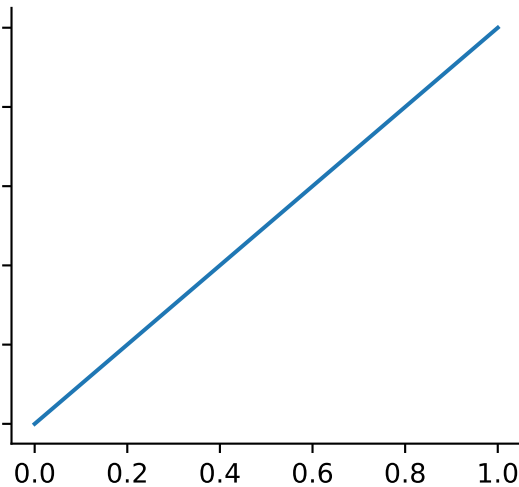

Supplement: Supplementary file 13 [file aab085461de182608ee9f607f3f7d18f-Supplemental.zip]

./figs/toy/dropout\_4\_layers\_100\_neurons.pdf

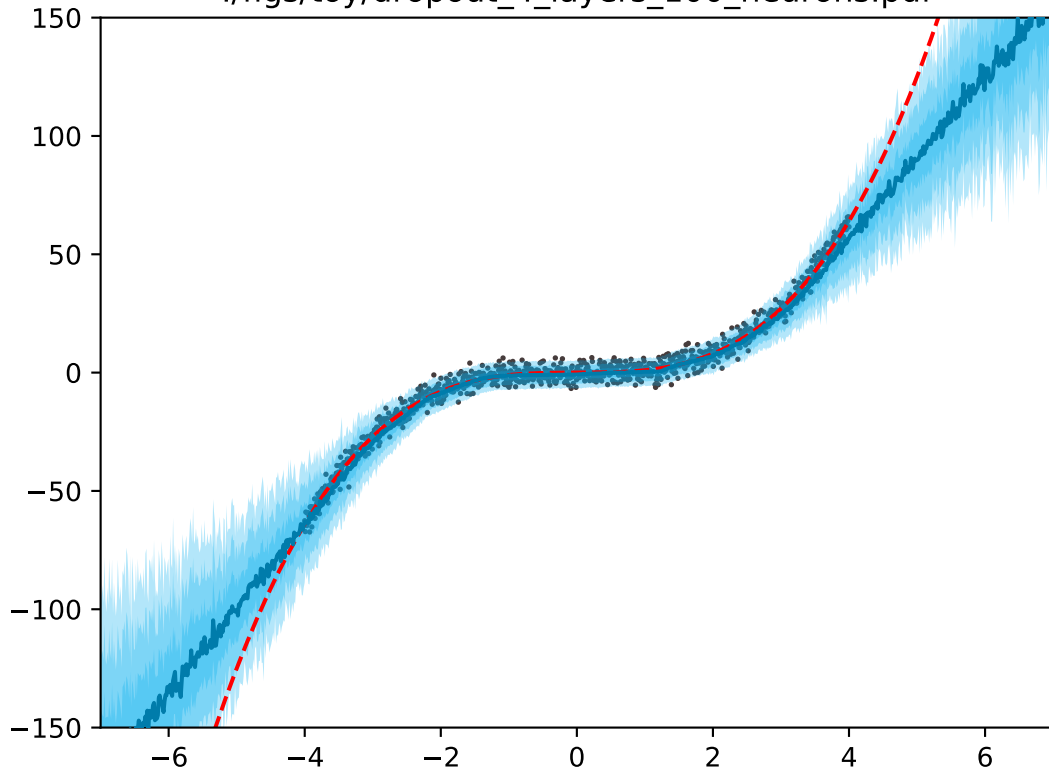

Supplement: Supplementary file 15 [file aab085461de182608ee9f607f3f7d18f-Supplemental.zip]

./figs/toy/evidence\_noreg\_4\_layers\_100\_neurons.pdf

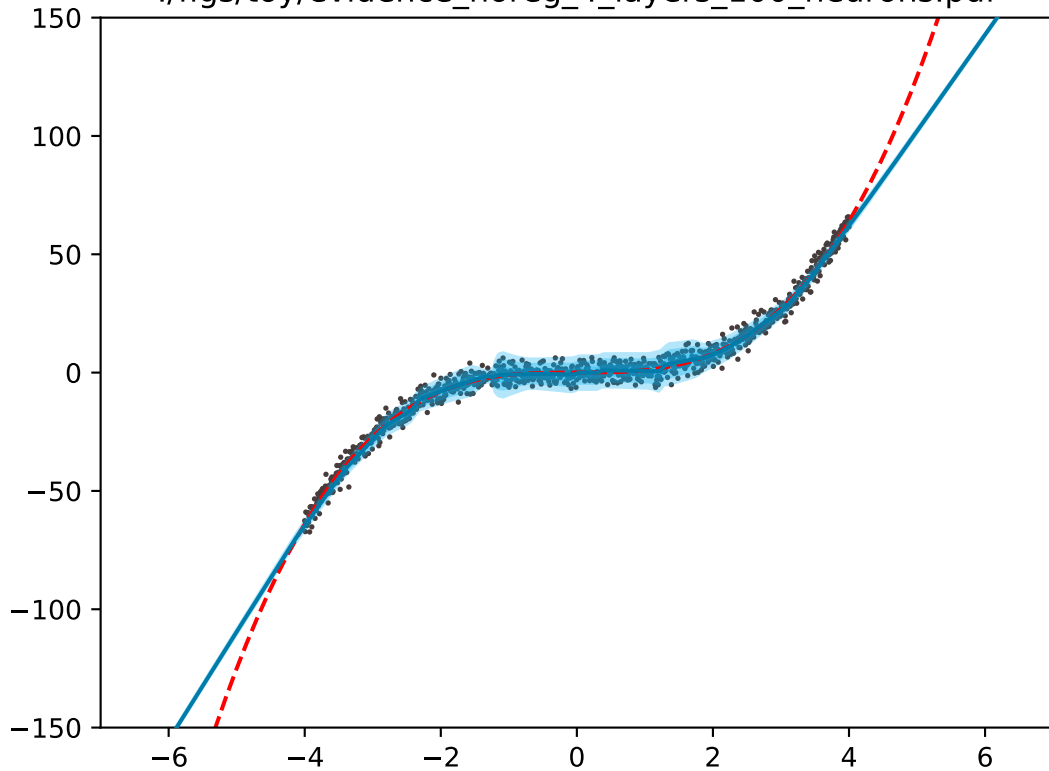

Supplement: Supplementary file 16 [file aab085461de182608ee9f607f3f7d18f-Supplemental.zip › supplemental/evidential_regression/figs/toy/evidence_noreg_4_layers_100_neurons.pdf]

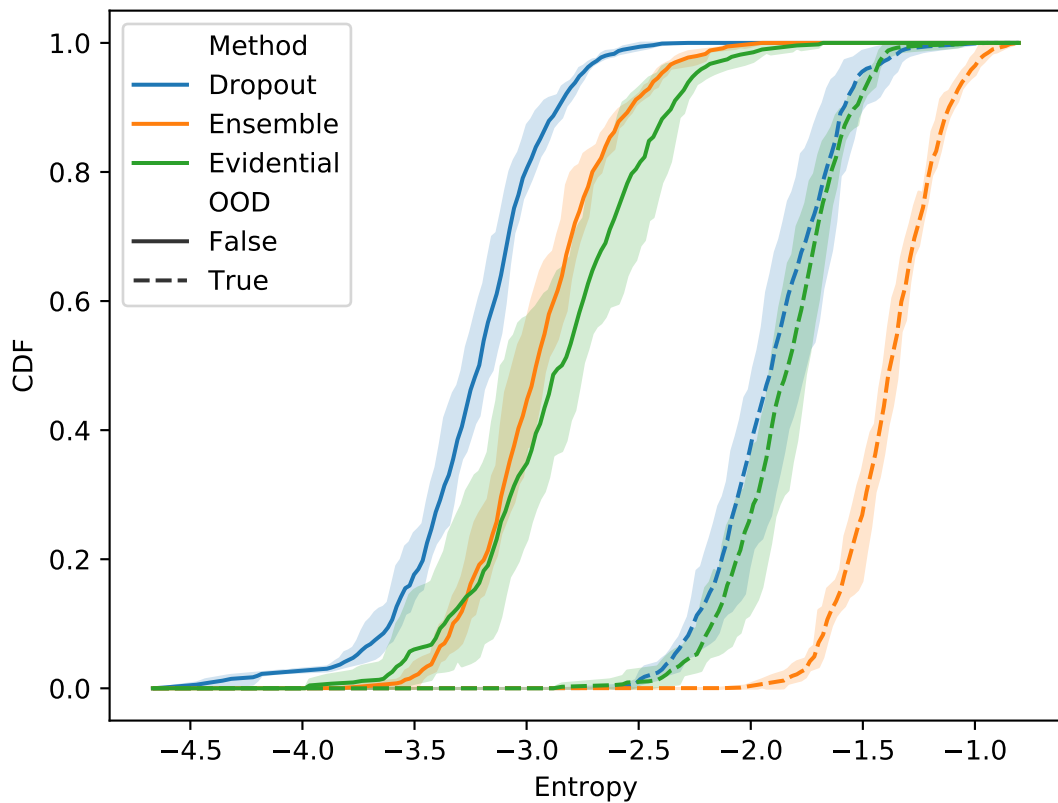

Supplement: Supplementary file 16 [file aab085461de182608ee9f607f3f7d18f-Supplemental.zip › supplemental/evidential_regression/figs/depth/ood_Entropy_cdfs.pdf]

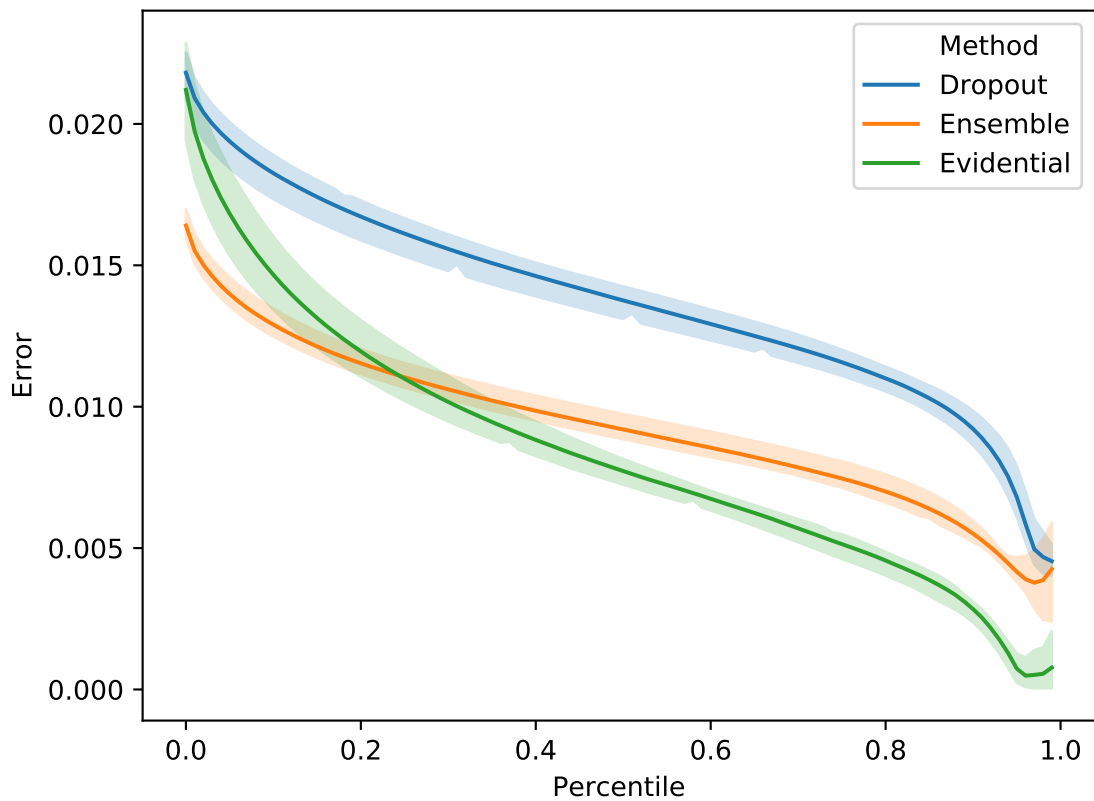

Supplement: Supplementary file 16 [file aab085461de182608ee9f607f3f7d18f-Supplemental.zip › supplemental/evidential_regression/figs/depth/cutoff_eps-0.0_ood-False.pdf]

Method = Dropout

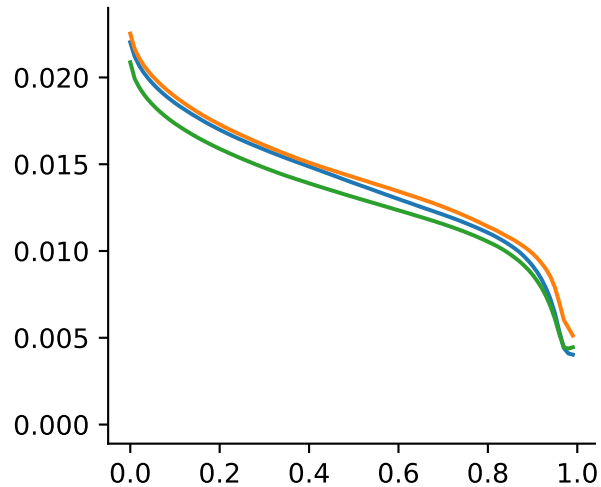

Method = Ensemble

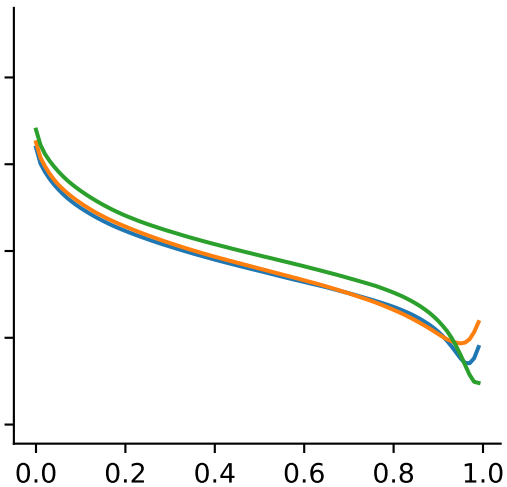

Method = Evidential

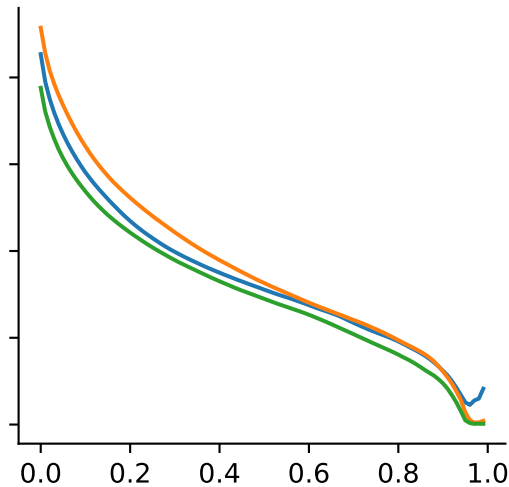

Supplement: Supplementary file 16 [file aab085461de182608ee9f607f3f7d18f-Supplemental.zip › supplemental/evidential_regression/figs/depth/cutoff_eps-0.0_ood-False_trial_panel.pdf]

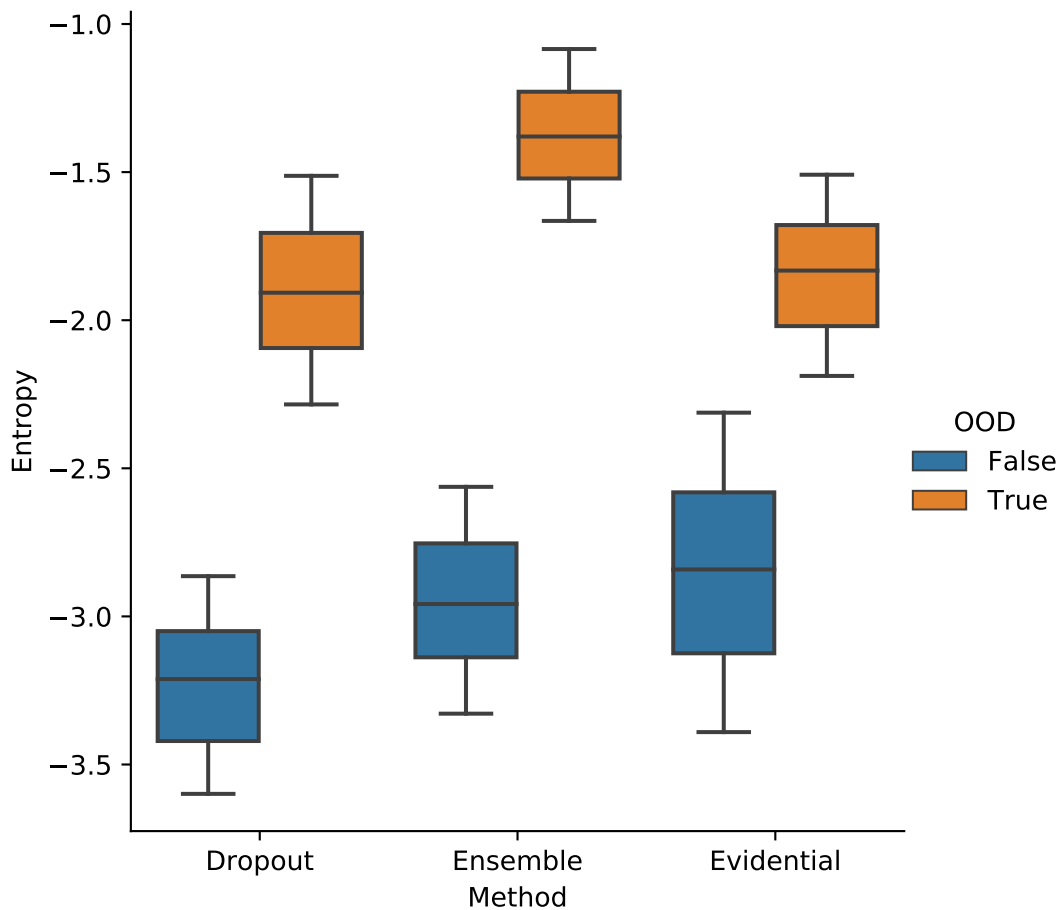

Supplement: Supplementary file 16 [file aab085461de182608ee9f607f3f7d18f-Supplemental.zip › supplemental/evidential_regression/figs/depth/ood_Entropy_box.pdf]
